# Supplementary material for: Thermal conditions and age structure determine the spawning regularities and condition of Baltic herring (Clupea harengus membras) in the NE of the Baltic Sea
Source: PeerJ. 2019 Jul 22;7:e7345. doi: 10.7717/peerj.7345 (PMC6657675; doi:10.7717/peerj.7345)
Supplement: Appendix 1 — The length, weight, condition factor (K), age, sex, calendar week of sampling and year of analysed Baltic herring. [file peerj-07-7345-s001.pdf]

The length, weight, condition factor (K), age, sex, calendar week of sampling and year of analysed Baltic herring.

| LENGTH, cm | WEIGHT, g | K   | AGE, yrs | SEX | week | year |
|------------|-----------|-----|----------|-----|------|------|
| 16         | 23,2      | 0,6 | 4        | 2   | 23   | 2003 |
| 15         | 18,5      | 0,5 | 3        | 2   | 20   | 1999 |
| 14,2       | 18,3      | 0,6 | 2        | 2   | 25   | 2003 |
| 12,2       | 12,9      | 0,7 | 2        | 2   | 25   | 2007 |
| 30,5       | 16,3      | 0,1 | 2        | 2   | 19   | 2012 |
| 15,5       | 9,8       | 0,3 | 1        | 2   | 26   | 2001 |
| 18,4       | 18,4      | 0,3 | 2        | 2   | 22   | 2000 |
| 13,9       | 8,2       | 0,3 | 2        | 2   | 22   | 2007 |
| 17,1       | 18,5      | 0,4 | 4        | 2   | 19   | 2012 |
| 14,4       | 11,2      | 0,4 | 3        | 2   | 24   | 2001 |
| 21,5       | 37,4      | 0,4 | 8        | 2   | 17   | 2012 |
| 14,7       | 12,5      | 0,4 | 3        | 2   | 18   | 2002 |
| 15,9       | 15,9      | 0,4 | 5        | 2   | 21   | 2014 |
| 14,3       | 11,6      | 0,4 | 4        | 2   | 21   | 2003 |
| 15         | 13,6      | 0,4 | 3        | 2   | 21   | 2001 |
| 14         | 11,2      | 0,4 | 4        | 2   | 23   | 1999 |
| 14,9       | 13,6      | 0,4 | 3        | 2   | 20   | 2008 |
| 13,8       | 10,9      | 0,4 | 2        | 2   | 26   | 2001 |
| 14         | 11,4      | 0,4 | 3        | 2   | 25   | 2004 |
| 15,3       | 14,9      | 0,4 | 5        | 2   | 19   | 2006 |
| 13,2       | 9,7       | 0,4 | 2        | 2   | 20   | 2007 |
| 14,8       | 13,8      | 0,4 | 5        | 2   | 23   | 2010 |
| 14,8       | 13,8      | 0,4 | 5        | 2   | 23   | 2010 |
| 15,7       | 16,5      | 0,4 | 8        | 2   | 23   | 2010 |
| 15,7       | 16,5      | 0,4 | 8        | 2   | 23   | 2010 |
| 16,9       | 20,7      | 0,4 | 4        | 2   | 20   | 2001 |

|      |      |     |     |   |    |      |
|------|------|-----|-----|---|----|------|
| 16,9 | 20,9 | 0,4 | 4   | 2 | 18 | 2004 |
| 19,3 | 31,2 | 0,4 | 5   | 2 | 18 | 2012 |
| 13,2 | 10   | 0,4 | 2   | 2 | 20 | 2013 |
| 14,2 | 12,5 | 0,4 | 4   | 2 | 23 | 2011 |
| 18,7 | 28,7 | 0,4 | 10+ | 2 | 17 | 2014 |
| 16,2 | 19   | 0,4 | 5   | 2 | 19 | 2004 |
| 17   | 22,2 | 0,5 | 8   | 2 | 21 | 2010 |
| 17   | 22,2 | 0,5 | 8   | 2 | 21 | 2010 |
| 14   | 12,4 | 0,5 | 3   | 2 | 18 | 2007 |
| 16,9 | 21,9 | 0,5 | 5   | 2 | 21 | 2000 |
| 13,5 | 11,2 | 0,5 | 3   | 2 | 19 | 2015 |
| 14,7 | 14,5 | 0,5 | 3   | 2 | 20 | 2004 |
| 14,1 | 12,8 | 0,5 | 4   | 2 | 20 | 2009 |
| 18,3 | 28   | 0,5 | 10  | 2 | 15 | 2015 |
| 13,7 | 11,8 | 0,5 | 3   | 2 | 21 | 2009 |
| 14   | 12,6 | 0,5 | 5   | 2 | 20 | 2012 |
| 14,7 | 14,6 | 0,5 | 3   | 2 | 20 | 2008 |
| 15,4 | 16,8 | 0,5 | 6   | 2 | 20 | 2004 |
| 17,9 | 26,5 | 0,5 | 4   | 2 | 19 | 2013 |
| 14   | 12,7 | 0,5 | 3   | 2 | 19 | 2009 |
| 13,3 | 10,9 | 0,5 | 3   | 2 | 25 | 2004 |
| 16,2 | 19,7 | 0,5 | 10  | 2 | 19 | 2015 |
| 14,1 | 13   | 0,5 | 2   | 2 | 19 | 2004 |
| 16,2 | 19,8 | 0,5 | 5   | 2 | 23 | 2001 |
| 15,3 | 16,7 | 0,5 | 3   | 2 | 18 | 2015 |
| 21,4 | 45,7 | 0,5 | 10  | 2 | 19 | 2015 |
| 15,9 | 18,8 | 0,5 | 3   | 2 | 23 | 2001 |
| 14,3 | 13,7 | 0,5 | 4   | 2 | 26 | 2006 |

|      |      |     |   |   |    |      |
|------|------|-----|---|---|----|------|
| 12,1 | 8,3  | 0,5 | 1 | 2 | 20 | 2013 |
| 16,1 | 19,6 | 0,5 | 6 | 2 | 20 | 2013 |
| 14   | 12,9 | 0,5 | 2 | 2 | 20 | 2013 |
| 11,3 | 6,8  | 0,5 | 2 | 2 | 23 | 2004 |
| 14,5 | 14,4 | 0,5 | 4 | 2 | 25 | 2004 |
| 16,8 | 22,4 | 0,5 | 7 | 2 | 19 | 2012 |
| 15,2 | 16,6 | 0,5 | 6 | 2 | 25 | 2003 |
| 14   | 13   | 0,5 | 3 | 2 | 25 | 2004 |
| 15,8 | 18,7 | 0,5 | 4 | 2 | 25 | 2003 |
| 14,1 | 13,3 | 0,5 | 8 | 2 | 26 | 2006 |
| 16,2 | 20,2 | 0,5 | 6 | 2 | 23 | 2010 |
| 16,2 | 20,2 | 0,5 | 6 | 2 | 23 | 2010 |
| 16,7 | 22,2 | 0,5 | 4 | 2 | 19 | 2014 |
| 15,6 | 18,1 | 0,5 | 4 | 2 | 25 | 2004 |
| 13,4 | 11,5 | 0,5 | 3 | 2 | 22 | 2011 |
| 13,4 | 11,5 | 0,5 | 2 | 2 | 20 | 2013 |
| 15,5 | 17,8 | 0,5 | 5 | 2 | 18 | 2007 |
| 13,2 | 11   | 0,5 | 2 | 2 | 20 | 2002 |
| 16,1 | 20,1 | 0,5 | 7 | 2 | 19 | 2009 |
| 15,8 | 19   | 0,5 | 5 | 2 | 21 | 2001 |
| 15,1 | 16,6 | 0,5 | 4 | 2 | 20 | 2009 |
| 17   | 23,7 | 0,5 | 6 | 2 | 22 | 2004 |
| 18,4 | 30,1 | 0,5 | 6 | 2 | 22 | 2011 |
| 16,1 | 20,2 | 0,5 | 6 | 2 | 22 | 2011 |
| 15,2 | 17   | 0,5 | 5 | 2 | 22 | 2009 |
| 13,3 | 11,4 | 0,5 | 2 | 2 | 23 | 2009 |
| 13,1 | 10,9 | 0,5 | 2 | 2 | 20 | 2013 |
| 13,6 | 12,2 | 0,5 | 3 | 2 | 23 | 2010 |

|      |      |     |   |   |    |      |
|------|------|-----|---|---|----|------|
| 13,6 | 12,2 | 0,5 | 3 | 2 | 23 | 2010 |
| 14,4 | 14,5 | 0,5 | 5 | 2 | 20 | 2010 |
| 14,4 | 14,5 | 0,5 | 5 | 2 | 20 | 2010 |
| 15,7 | 18,8 | 0,5 | 5 | 2 | 20 | 2010 |
| 15,7 | 18,8 | 0,5 | 5 | 2 | 20 | 2010 |
| 15,3 | 17,4 | 0,5 | 5 | 2 | 23 | 2010 |
| 15,3 | 17,4 | 0,5 | 5 | 2 | 23 | 2010 |
| 15   | 16,4 | 0,5 | 3 | 2 | 18 | 2015 |
| 14,9 | 16,1 | 0,5 | 3 | 2 | 20 | 2012 |
| 13,5 | 12   | 0,5 | 3 | 2 | 23 | 2010 |
| 13,5 | 12   | 0,5 | 3 | 2 | 23 | 2010 |
| 14,7 | 15,5 | 0,5 | 3 | 2 | 21 | 2010 |
| 14,7 | 15,5 | 0,5 | 5 | 2 | 21 | 2010 |
| 14,7 | 15,5 | 0,5 | 3 | 2 | 21 | 2010 |
| 14,7 | 15,5 | 0,5 | 5 | 2 | 21 | 2010 |
| 17,1 | 24,4 | 0,5 | 8 | 2 | 19 | 2012 |
| 14,2 | 14   | 0,5 | 4 | 2 | 21 | 2009 |
| 14,4 | 14,6 | 0,5 | 3 | 2 | 17 | 2014 |
| 13,6 | 12,3 | 0,5 | 2 | 2 | 20 | 2013 |
| 14,3 | 14,3 | 0,5 | 4 | 2 | 22 | 2011 |
| 18,1 | 29   | 0,5 | 6 | 2 | 20 | 2013 |
| 16,4 | 21,6 | 0,5 | 3 | 2 | 20 | 2003 |
| 15,6 | 18,6 | 0,5 | 3 | 2 | 20 | 2012 |
| 14,7 | 15,6 | 0,5 | 4 | 2 | 15 | 2015 |
| 13,2 | 11,3 | 0,5 | 3 | 2 | 23 | 2010 |
| 13,2 | 11,3 | 0,5 | 3 | 2 | 23 | 2010 |
| 16,8 | 23,3 | 0,5 | 5 | 2 | 24 | 2006 |
| 16,7 | 22,9 | 0,5 | 6 | 2 | 16 | 2015 |

|      |      |     |   |   |    |      |
|------|------|-----|---|---|----|------|
| 15,8 | 19,4 | 0,5 | 5 | 2 | 17 | 2009 |
| 14   | 13,5 | 0,5 | 3 | 2 | 22 | 2011 |
| 14,5 | 15   | 0,5 | 4 | 2 | 26 | 2006 |
| 14,4 | 14,7 | 0,5 | 3 | 2 | 20 | 2010 |
| 14,4 | 14,7 | 0,5 | 3 | 2 | 20 | 2010 |
| 15,4 | 18   | 0,5 | 5 | 2 | 23 | 1999 |
| 16,2 | 21   | 0,5 | 4 | 2 | 25 | 2003 |
| 14,7 | 15,7 | 0,5 | 2 | 2 | 18 | 2000 |
| 12,3 | 9,2  | 0,5 | 2 | 2 | 23 | 2010 |
| 12,3 | 9,2  | 0,5 | 2 | 2 | 23 | 2010 |
| 15   | 16,7 | 0,5 | 3 | 2 | 22 | 2001 |
| 14,6 | 15,4 | 0,5 | 5 | 2 | 19 | 2010 |
| 14,6 | 15,4 | 0,5 | 5 | 2 | 19 | 2010 |
| 14,9 | 16,4 | 0,5 | 3 | 2 | 20 | 2012 |
| 14,3 | 14,5 | 0,5 | 2 | 2 | 19 | 2001 |
| 14,2 | 14,2 | 0,5 | 3 | 2 | 26 | 2006 |
| 15,6 | 18,9 | 0,5 | 3 | 2 | 18 | 2015 |
| 14,6 | 15,5 | 0,5 | 3 | 2 | 20 | 2010 |
| 14,6 | 15,5 | 0,5 | 3 | 2 | 20 | 2010 |
| 13,1 | 11,2 | 0,5 | 6 | 2 | 20 | 2009 |
| 15,2 | 17,5 | 0,5 | 4 | 2 | 22 | 2011 |
| 13,8 | 13,1 | 0,5 | 2 | 2 | 20 | 2012 |
| 14,4 | 14,9 | 0,5 | 4 | 2 | 21 | 2009 |
| 14,3 | 14,6 | 0,5 | 4 | 2 | 21 | 2011 |
| 14,3 | 14,6 | 0,5 | 3 | 2 | 19 | 2015 |
| 14,1 | 14   | 0,5 | 4 | 2 | 19 | 2015 |
| 11,7 | 8    | 0,5 | 2 | 2 | 25 | 2004 |
| 15,9 | 20,1 | 0,5 | 3 | 2 | 17 | 2014 |

|      |      |     |   |   |    |      |
|------|------|-----|---|---|----|------|
| 17,3 | 25,9 | 0,5 | 6 | 2 | 21 | 2010 |
| 17,3 | 25,9 | 0,5 | 6 | 2 | 21 | 2010 |
| 16,7 | 23,3 | 0,5 | 5 | 2 | 25 | 2003 |
| 16   | 20,5 | 0,5 | 4 | 2 | 22 | 2003 |
| 15   | 16,9 | 0,5 | 8 | 2 | 23 | 2001 |
| 15   | 16,9 | 0,5 | 6 | 2 | 22 | 2007 |
| 14,9 | 16,6 | 0,5 | 3 | 2 | 21 | 2006 |
| 14,4 | 15   | 0,5 | 3 | 2 | 20 | 2003 |
| 13,1 | 11,3 | 0,5 | 1 | 2 | 15 | 2015 |
| 13,9 | 13,5 | 0,5 | 2 | 2 | 19 | 2012 |
| 14,3 | 14,7 | 0,5 | 3 | 2 | 18 | 2015 |
| 14   | 13,8 | 0,5 | 3 | 2 | 23 | 2015 |
| 16   | 20,6 | 0,5 | 4 | 2 | 21 | 2001 |
| 11   | 6,7  | 0,5 | 2 | 2 | 23 | 2004 |
| 12   | 8,7  | 0,5 | 2 | 2 | 26 | 2006 |
| 15   | 17   | 0,5 | 3 | 2 | 20 | 2003 |
| 15   | 17   | 0,5 | 4 | 2 | 25 | 2003 |
| 15   | 17   | 0,5 | 5 | 2 | 23 | 2010 |
| 15   | 17   | 0,5 | 5 | 2 | 23 | 2010 |
| 13,2 | 11,6 | 0,5 | 3 | 2 | 19 | 2015 |
| 15,5 | 18,8 | 0,5 | 5 | 2 | 23 | 2010 |
| 15,5 | 18,8 | 0,5 | 5 | 2 | 23 | 2010 |
| 15,5 | 18,8 | 0,5 | 4 | 2 | 20 | 2013 |
| 16,6 | 23,1 | 0,5 | 4 | 2 | 20 | 2013 |
| 15,9 | 20,3 | 0,5 | 4 | 2 | 17 | 2008 |
| 15,1 | 17,4 | 0,5 | 7 | 2 | 23 | 2015 |
| 16,4 | 22,3 | 0,5 | 4 | 2 | 15 | 2015 |
| 14,4 | 15,1 | 0,5 | 4 | 2 | 23 | 2001 |

|      |      |     |   |   |    |      |
|------|------|-----|---|---|----|------|
| 16,2 | 21,5 | 0,5 | 3 | 2 | 18 | 2002 |
| 16,2 | 21,5 | 0,5 | 4 | 2 | 16 | 2015 |
| 11,7 | 8,1  | 0,5 | 2 | 2 | 19 | 2006 |
| 14,8 | 16,4 | 0,5 | 4 | 2 | 21 | 2010 |
| 14,8 | 16,4 | 0,5 | 4 | 2 | 21 | 2010 |
| 14   | 13,9 | 0,5 | 2 | 2 | 19 | 2001 |
| 14,1 | 14,2 | 0,5 | 3 | 2 | 18 | 2015 |
| 15   | 17,1 | 0,5 | 5 | 2 | 26 | 2006 |
| 15   | 17,1 | 0,5 | 4 | 2 | 15 | 2015 |
| 17,4 | 26,7 | 0,5 | 5 | 2 | 20 | 2012 |
| 15,2 | 17,8 | 0,5 | 4 | 2 | 21 | 2011 |
| 16,8 | 24,1 | 0,5 | 4 | 2 | 16 | 2015 |
| 15,6 | 19,3 | 0,5 | 5 | 2 | 22 | 2009 |
| 14,5 | 15,5 | 0,5 | 3 | 2 | 21 | 2010 |
| 14,5 | 15,5 | 0,5 | 3 | 2 | 21 | 2010 |
| 13,6 | 12,8 | 0,5 | 3 | 2 | 18 | 2008 |
| 13,6 | 12,8 | 0,5 | 2 | 2 | 19 | 2010 |
| 13,6 | 12,8 | 0,5 | 2 | 2 | 19 | 2010 |
| 17,2 | 25,9 | 0,5 | 8 | 2 | 20 | 2013 |
| 13,7 | 13,1 | 0,5 | 2 | 2 | 22 | 2009 |
| 15   | 17,2 | 0,5 | 4 | 2 | 21 | 2011 |
| 15   | 17,2 | 0,5 | 4 | 2 | 20 | 2013 |
| 16,9 | 24,6 | 0,5 | 5 | 2 | 20 | 2012 |
| 13   | 11,2 | 0,5 | 3 | 2 | 20 | 2007 |
| 14,2 | 14,6 | 0,5 | 2 | 2 | 26 | 2003 |
| 14,7 | 16,2 | 0,5 | 3 | 2 | 20 | 2010 |
| 14,7 | 16,2 | 0,5 | 3 | 2 | 20 | 2010 |
| 13,3 | 12   | 0,5 | 4 | 2 | 21 | 2009 |

|      |      |     |   |   |    |      |
|------|------|-----|---|---|----|------|
| 14,1 | 14,3 | 0,5 | 2 | 2 | 19 | 2013 |
| 14   | 14   | 0,5 | 2 | 2 | 20 | 2012 |
| 16,3 | 22,1 | 0,5 | 6 | 2 | 20 | 2013 |
| 16,2 | 21,7 | 0,5 | 4 | 2 | 23 | 2001 |
| 14,9 | 16,9 | 0,5 | 8 | 2 | 26 | 2005 |
| 14,6 | 15,9 | 0,5 | 4 | 2 | 19 | 1999 |
| 14,6 | 15,9 | 0,5 | 5 | 2 | 20 | 2007 |
| 15,3 | 18,3 | 0,5 | 4 | 2 | 23 | 2011 |
| 14,5 | 15,6 | 0,5 | 4 | 2 | 21 | 2009 |
| 12,5 | 10   | 0,5 | 2 | 2 | 18 | 2002 |
| 15,4 | 18,7 | 0,5 | 6 | 2 | 20 | 2001 |
| 15,8 | 20,2 | 0,5 | 4 | 2 | 20 | 2013 |
| 16,8 | 24,3 | 0,5 | 5 | 2 | 23 | 2001 |
| 16   | 21   | 0,5 | 5 | 2 | 20 | 2012 |
| 16,2 | 21,8 | 0,5 | 8 | 2 | 23 | 2008 |
| 13,6 | 12,9 | 0,5 | 3 | 2 | 21 | 2010 |
| 13,6 | 12,9 | 0,5 | 3 | 2 | 21 | 2010 |
| 17   | 25,2 | 0,5 | 8 | 2 | 20 | 2013 |
| 14,3 | 15   | 0,5 | 4 | 2 | 19 | 2009 |
| 14,3 | 15   | 0,5 | 3 | 2 | 19 | 2015 |
| 11,4 | 7,6  | 0,5 | 2 | 2 | 22 | 2011 |
| 13,7 | 13,2 | 0,5 | 2 | 2 | 19 | 2013 |
| 13,7 | 13,2 | 0,5 | 2 | 2 | 20 | 2013 |
| 14,2 | 14,7 | 0,5 | 3 | 2 | 21 | 2010 |
| 14,2 | 14,7 | 0,5 | 3 | 2 | 21 | 2010 |
| 14,2 | 14,7 | 0,5 | 3 | 2 | 16 | 2015 |
| 14,1 | 14,4 | 0,5 | 3 | 2 | 21 | 2014 |
| 14,1 | 14,4 | 0,5 | 3 | 2 | 23 | 2014 |

|      |      |     |   |   |    |      |
|------|------|-----|---|---|----|------|
| 14   | 14,1 | 0,5 | 3 | 2 | 17 | 2008 |
| 14,6 | 16   | 0,5 | 3 | 2 | 20 | 2012 |
| 15,7 | 19,9 | 0,5 | 5 | 2 | 20 | 2006 |
| 13   | 11,3 | 0,5 | 2 | 2 | 17 | 2014 |
| 15,4 | 18,8 | 0,5 | 6 | 2 | 20 | 2013 |
| 18,5 | 32,6 | 0,5 | 7 | 2 | 19 | 2015 |
| 14,8 | 16,7 | 0,5 | 5 | 2 | 19 | 2009 |
| 14,8 | 16,7 | 0,5 | 3 | 2 | 23 | 2010 |
| 14,8 | 16,7 | 0,5 | 3 | 2 | 23 | 2010 |
| 13,4 | 12,4 | 0,5 | 2 | 2 | 20 | 2010 |
| 13,4 | 12,4 | 0,5 | 2 | 2 | 20 | 2010 |
| 15,2 | 18,1 | 0,5 | 4 | 2 | 22 | 2011 |
| 15   | 17,4 | 0,5 | 3 | 2 | 21 | 2001 |
| 15   | 17,4 | 0,5 | 3 | 2 | 23 | 2008 |
| 15   | 17,4 | 0,5 | 3 | 2 | 21 | 2010 |
| 15   | 17,4 | 0,5 | 3 | 2 | 21 | 2010 |
| 12,3 | 9,6  | 0,5 | 2 | 2 | 21 | 2009 |
| 15,6 | 19,6 | 0,5 | 3 | 2 | 20 | 2010 |
| 15,6 | 19,6 | 0,5 | 3 | 2 | 20 | 2010 |
| 14,7 | 16,4 | 0,5 | 3 | 2 | 21 | 2010 |
| 14,7 | 16,4 | 0,5 | 3 | 2 | 21 | 2010 |
| 14,7 | 16,4 | 0,5 | 4 | 2 | 23 | 2011 |
| 15,3 | 18,5 | 0,5 | 5 | 2 | 21 | 2010 |
| 15,3 | 18,5 | 0,5 | 5 | 2 | 21 | 2010 |
| 13,6 | 13   | 0,5 | 4 | 2 | 18 | 2015 |
| 15,1 | 17,8 | 0,5 | 6 | 2 | 20 | 2013 |
| 12,9 | 11,1 | 0,5 | 2 | 2 | 22 | 2007 |
| 12,5 | 10,1 | 0,5 | 2 | 2 | 18 | 2007 |

|      |      |     |   |   |    |      |
|------|------|-----|---|---|----|------|
| 15,8 | 20,4 | 0,5 | 4 | 2 | 17 | 2009 |
| 13,7 | 13,3 | 0,5 | 3 | 2 | 23 | 2010 |
| 13,7 | 13,3 | 0,5 | 3 | 2 | 23 | 2010 |
| 14,1 | 14,5 | 0,5 | 3 | 2 | 18 | 2008 |
| 14,1 | 14,5 | 0,5 | 3 | 2 | 20 | 2010 |
| 14,1 | 14,5 | 0,5 | 3 | 2 | 20 | 2010 |
| 16,7 | 24,1 | 0,5 | 4 | 2 | 19 | 2015 |
| 15,4 | 18,9 | 0,5 | 6 | 2 | 20 | 2013 |
| 13,8 | 13,6 | 0,5 | 2 | 2 | 23 | 2001 |
| 14   | 14,2 | 0,5 | 3 | 2 | 18 | 2015 |
| 14,8 | 16,8 | 0,5 | 4 | 2 | 17 | 2009 |
| 14,8 | 16,8 | 0,5 | 4 | 2 | 23 | 2010 |
| 14,8 | 16,8 | 0,5 | 4 | 2 | 23 | 2010 |
| 14,8 | 16,8 | 0,5 | 6 | 2 | 23 | 2011 |
| 15,2 | 18,2 | 0,5 | 3 | 2 | 23 | 2001 |
| 14,5 | 15,8 | 0,5 | 5 | 2 | 21 | 2010 |
| 14,5 | 15,8 | 0,5 | 5 | 2 | 21 | 2010 |
| 14,5 | 15,8 | 0,5 | 4 | 2 | 22 | 2011 |
| 15   | 17,5 | 0,5 | 4 | 2 | 23 | 2004 |
| 13,3 | 12,2 | 0,5 | 4 | 2 | 26 | 2006 |
| 13   | 11,4 | 0,5 | 2 | 2 | 23 | 2006 |
| 17   | 25,5 | 0,5 | 8 | 2 | 15 | 2015 |
| 15,7 | 20,1 | 0,5 | 4 | 2 | 20 | 2013 |
| 14,7 | 16,5 | 0,5 | 5 | 2 | 19 | 1999 |
| 14,7 | 16,5 | 0,5 | 3 | 2 | 18 | 2015 |
| 13,4 | 12,5 | 0,5 | 2 | 2 | 20 | 2013 |
| 14,9 | 17,2 | 0,5 | 4 | 2 | 18 | 2008 |
| 14,2 | 14,9 | 0,5 | 2 | 2 | 16 | 2008 |

|      |      |     |   |   |    |      |
|------|------|-----|---|---|----|------|
| 13,1 | 11,7 | 0,5 | 2 | 2 | 21 | 2001 |
| 13,1 | 11,7 | 0,5 | 3 | 2 | 22 | 2011 |
| 14,6 | 16,2 | 0,5 | 3 | 2 | 21 | 2005 |
| 14,6 | 16,2 | 0,5 | 3 | 2 | 16 | 2015 |
| 13,6 | 13,1 | 0,5 | 2 | 2 | 26 | 2006 |
| 13,6 | 13,1 | 0,5 | 4 | 2 | 21 | 2009 |
| 14,1 | 14,6 | 0,5 | 6 | 2 | 20 | 2011 |
| 16,5 | 23,4 | 0,5 | 5 | 2 | 20 | 2013 |
| 16,8 | 24,7 | 0,5 | 6 | 2 | 20 | 2013 |
| 14   | 14,3 | 0,5 | 2 | 2 | 19 | 2001 |
| 13,8 | 13,7 | 0,5 | 2 | 2 | 19 | 2013 |
| 13,9 | 14   | 0,5 | 2 | 2 | 20 | 2012 |
| 14,8 | 16,9 | 0,5 | 5 | 2 | 21 | 2010 |
| 14,8 | 16,9 | 0,5 | 5 | 2 | 21 | 2010 |
| 15   | 17,6 | 0,5 | 4 | 2 | 19 | 2009 |
| 15   | 17,6 | 0,5 | 4 | 2 | 21 | 2014 |
| 15,6 | 19,8 | 0,5 | 5 | 2 | 21 | 2010 |
| 15,6 | 19,8 | 0,5 | 5 | 2 | 21 | 2010 |
| 14,5 | 15,9 | 0,5 | 7 | 2 | 20 | 2009 |
| 16,7 | 24,3 | 0,5 | 5 | 2 | 20 | 2012 |
| 11,9 | 8,8  | 0,5 | 2 | 2 | 20 | 2007 |
| 15,8 | 20,6 | 0,5 | 6 | 2 | 23 | 2010 |
| 15,8 | 20,6 | 0,5 | 6 | 2 | 23 | 2010 |
| 12,7 | 10,7 | 0,5 | 2 | 2 | 21 | 2009 |
| 14,7 | 16,6 | 0,5 | 4 | 2 | 21 | 2009 |
| 15,4 | 19,1 | 0,5 | 3 | 2 | 25 | 2003 |
| 15,4 | 19,1 | 0,5 | 4 | 2 | 19 | 2010 |
| 15,4 | 19,1 | 0,5 | 4 | 2 | 19 | 2010 |

|      |      |     |    |   |    |      |
|------|------|-----|----|---|----|------|
| 17   | 25,7 | 0,5 | 10 | 2 | 22 | 2007 |
| 17,3 | 27,1 | 0,5 | 10 | 2 | 23 | 1999 |
| 13   | 11,5 | 0,5 | 2  | 2 | 19 | 2014 |
| 13   | 11,5 | 0,5 | 2  | 2 | 19 | 2015 |
| 14,2 | 15   | 0,5 | 4  | 2 | 15 | 2015 |
| 15,2 | 18,4 | 0,5 | 6  | 2 | 23 | 2001 |
| 15,2 | 18,4 | 0,5 | 5  | 2 | 24 | 2001 |
| 18,2 | 31,6 | 0,5 | 8  | 2 | 20 | 2010 |
| 18,2 | 31,6 | 0,5 | 8  | 2 | 20 | 2010 |
| 13,5 | 12,9 | 0,5 | 2  | 2 | 20 | 2013 |
| 14,8 | 17   | 0,5 | 4  | 2 | 21 | 2005 |
| 14,8 | 17   | 0,5 | 4  | 2 | 19 | 2009 |
| 15   | 17,7 | 0,5 | 3  | 2 | 23 | 2001 |
| 12,4 | 10   | 0,5 | 2  | 2 | 23 | 2004 |
| 14,5 | 16   | 0,5 | 4  | 2 | 20 | 2000 |
| 17   | 25,8 | 0,5 | 4  | 2 | 20 | 2013 |
| 16,5 | 23,6 | 0,5 | 3  | 2 | 22 | 2003 |
| 15,4 | 19,2 | 0,5 | 4  | 2 | 23 | 2001 |
| 15,4 | 19,2 | 0,5 | 4  | 2 | 19 | 2004 |
| 14,7 | 16,7 | 0,5 | 3  | 2 | 19 | 2008 |
| 14,7 | 16,7 | 0,5 | 3  | 2 | 19 | 2010 |
| 14,7 | 16,7 | 0,5 | 3  | 2 | 19 | 2010 |
| 18,9 | 35,5 | 0,5 | 6  | 2 | 20 | 2013 |
| 16,4 | 23,2 | 0,5 | 7  | 2 | 22 | 2009 |
| 13,2 | 12,1 | 0,5 | 2  | 2 | 20 | 2013 |
| 15,5 | 19,6 | 0,5 | 6  | 2 | 20 | 2008 |
| 14,3 | 15,4 | 0,5 | 2  | 2 | 24 | 2001 |
| 14,3 | 15,4 | 0,5 | 4  | 2 | 25 | 2004 |

|      |      |     |   |   |    |      |
|------|------|-----|---|---|----|------|
| 15,2 | 18,5 | 0,5 | 6 | 2 | 20 | 2013 |
| 15,2 | 18,5 | 0,5 | 4 | 2 | 16 | 2015 |
| 16,2 | 22,4 | 0,5 | 4 | 2 | 17 | 2014 |
| 16,1 | 22   | 0,5 | 6 | 2 | 26 | 2006 |
| 12,7 | 10,8 | 0,5 | 2 | 2 | 25 | 2004 |
| 15   | 17,8 | 0,5 | 3 | 2 | 18 | 2015 |
| 15,3 | 18,9 | 0,5 | 5 | 2 | 19 | 2010 |
| 15,3 | 18,9 | 0,5 | 5 | 2 | 19 | 2010 |
| 15,3 | 18,9 | 0,5 | 4 | 2 | 15 | 2015 |
| 13,4 | 12,7 | 0,5 | 2 | 2 | 20 | 2010 |
| 13,4 | 12,7 | 0,5 | 2 | 2 | 20 | 2010 |
| 14,1 | 14,8 | 0,5 | 3 | 2 | 23 | 2001 |
| 14,1 | 14,8 | 0,5 | 3 | 2 | 17 | 2008 |
| 13   | 11,6 | 0,5 | 3 | 2 | 21 | 2008 |
| 11,9 | 8,9  | 0,5 | 2 | 2 | 18 | 2007 |
| 16,4 | 23,3 | 0,5 | 4 | 2 | 20 | 2001 |
| 13,5 | 13   | 0,5 | 3 | 2 | 26 | 2006 |
| 13,5 | 13   | 0,5 | 2 | 2 | 21 | 2008 |
| 14   | 14,5 | 0,5 | 3 | 2 | 20 | 2012 |
| 13,6 | 13,3 | 0,5 | 2 | 2 | 19 | 2013 |
| 16,3 | 22,9 | 0,5 | 6 | 2 | 25 | 2004 |
| 13,8 | 13,9 | 0,5 | 3 | 2 | 26 | 2006 |
| 14,4 | 15,8 | 0,5 | 3 | 2 | 15 | 2015 |
| 16,2 | 22,5 | 0,5 | 4 | 2 | 18 | 2001 |
| 13,1 | 11,9 | 0,5 | 3 | 2 | 21 | 2005 |
| 17,4 | 27,9 | 0,5 | 6 | 2 | 23 | 2001 |
| 15,7 | 20,5 | 0,5 | 4 | 2 | 19 | 2001 |
| 16,5 | 23,8 | 0,5 | 4 | 2 | 19 | 2002 |

|      |      |     |   |   |    |      |
|------|------|-----|---|---|----|------|
| 15,8 | 20,9 | 0,5 | 5 | 2 | 20 | 2012 |
| 14,3 | 15,5 | 0,5 | 2 | 2 | 21 | 2003 |
| 14,3 | 15,5 | 0,5 | 2 | 2 | 19 | 2008 |
| 14,6 | 16,5 | 0,5 | 4 | 2 | 21 | 2009 |
| 18,3 | 32,5 | 0,5 | 6 | 2 | 19 | 2015 |
| 15   | 17,9 | 0,5 | 7 | 2 | 22 | 2009 |
| 15,3 | 19   | 0,5 | 8 | 2 | 19 | 2010 |
| 15,3 | 19   | 0,5 | 6 | 2 | 20 | 2010 |
| 15,3 | 19   | 0,5 | 8 | 2 | 19 | 2010 |
| 15,3 | 19   | 0,5 | 6 | 2 | 20 | 2010 |
| 16,4 | 23,4 | 0,5 | 5 | 2 | 23 | 2010 |
| 16,4 | 23,4 | 0,5 | 5 | 2 | 23 | 2010 |
| 14,8 | 17,2 | 0,5 | 4 | 2 | 25 | 2004 |
| 12,1 | 9,4  | 0,5 | 2 | 2 | 26 | 2006 |
| 11,7 | 8,5  | 0,5 | 2 | 2 | 21 | 2006 |
| 18,2 | 32   | 0,5 | 5 | 2 | 20 | 2012 |
| 14,2 | 15,2 | 0,5 | 4 | 2 | 26 | 2006 |
| 14,2 | 15,2 | 0,5 | 3 | 2 | 19 | 2007 |
| 14,2 | 15,2 | 0,5 | 5 | 2 | 23 | 2010 |
| 14,2 | 15,2 | 0,5 | 5 | 2 | 23 | 2010 |
| 15,4 | 19,4 | 0,5 | 4 | 2 | 19 | 2012 |
| 13,3 | 12,5 | 0,5 | 3 | 2 | 19 | 2015 |
| 14,5 | 16,2 | 0,5 | 4 | 2 | 20 | 2004 |
| 14,5 | 16,2 | 0,5 | 3 | 2 | 21 | 2006 |
| 14,5 | 16,2 | 0,5 | 3 | 2 | 20 | 2010 |
| 14,5 | 16,2 | 0,5 | 3 | 2 | 20 | 2010 |
| 17,4 | 28   | 0,5 | 4 | 2 | 19 | 2012 |
| 14,1 | 14,9 | 0,5 | 3 | 2 | 20 | 2001 |

|      |      |     |   |   |    |      |
|------|------|-----|---|---|----|------|
| 14,1 | 14,9 | 0,5 | 3 | 2 | 19 | 2015 |
| 16,2 | 22,6 | 0,5 | 8 | 2 | 21 | 2003 |
| 14,7 | 16,9 | 0,5 | 3 | 2 | 19 | 2010 |
| 14,7 | 16,9 | 0,5 | 3 | 2 | 19 | 2010 |
| 14,9 | 17,6 | 0,5 | 3 | 2 | 20 | 2008 |
| 14   | 14,6 | 0,5 | 3 | 2 | 19 | 2015 |
| 15,7 | 20,6 | 0,5 | 3 | 2 | 20 | 2010 |
| 15,7 | 20,6 | 0,5 | 3 | 2 | 20 | 2010 |
| 12   | 9,2  | 0,5 | 2 | 2 | 22 | 2011 |
| 15,8 | 21   | 0,5 | 3 | 2 | 20 | 2001 |
| 15,8 | 21   | 0,5 | 8 | 2 | 26 | 2003 |
| 13,5 | 13,1 | 0,5 | 2 | 2 | 23 | 2001 |
| 12,5 | 10,4 | 0,5 | 3 | 2 | 21 | 2005 |
| 14,4 | 15,9 | 0,5 | 4 | 2 | 26 | 2009 |
| 14,4 | 15,9 | 0,5 | 3 | 2 | 23 | 2010 |
| 14,4 | 15,9 | 0,5 | 3 | 2 | 23 | 2010 |
| 15,2 | 18,7 | 0,5 | 5 | 2 | 18 | 2014 |
| 13   | 11,7 | 0,5 | 2 | 2 | 20 | 2012 |
| 13,6 | 13,4 | 0,5 | 3 | 2 | 23 | 2010 |
| 13,6 | 13,4 | 0,5 | 3 | 2 | 23 | 2010 |
| 13,8 | 14   | 0,5 | 5 | 2 | 25 | 2004 |
| 13,8 | 14   | 0,5 | 2 | 2 | 18 | 2008 |
| 13,8 | 14   | 0,5 | 3 | 2 | 22 | 2011 |
| 13,8 | 14   | 0,5 | 2 | 2 | 19 | 2012 |
| 15,3 | 19,1 | 0,5 | 5 | 2 | 21 | 2000 |
| 15   | 18   | 0,5 | 5 | 2 | 18 | 2015 |
| 16,6 | 24,4 | 0,5 | 7 | 2 | 20 | 2012 |
| 14,3 | 15,6 | 0,5 | 5 | 2 | 25 | 2005 |

|      |      |     |    |   |    |      |
|------|------|-----|----|---|----|------|
| 14,3 | 15,6 | 0,5 | 4  | 2 | 26 | 2009 |
| 16,8 | 25,3 | 0,5 | 6  | 2 | 21 | 2010 |
| 16,8 | 25,3 | 0,5 | 6  | 2 | 21 | 2010 |
| 14,8 | 17,3 | 0,5 | 4  | 2 | 19 | 2004 |
| 13,1 | 12   | 0,5 | 2  | 2 | 17 | 2014 |
| 11,9 | 9    | 0,5 | 2  | 2 | 18 | 2007 |
| 16,5 | 24   | 0,5 | 6  | 2 | 17 | 2008 |
| 16,5 | 24   | 0,5 | 4  | 2 | 20 | 2013 |
| 14,2 | 15,3 | 0,5 | 5  | 2 | 22 | 2007 |
| 15,1 | 18,4 | 0,5 | 3  | 2 | 21 | 2015 |
| 14,5 | 16,3 | 0,5 | 2  | 2 | 23 | 2001 |
| 14,5 | 16,3 | 0,5 | 2  | 2 | 23 | 2010 |
| 14,5 | 16,3 | 0,5 | 2  | 2 | 23 | 2010 |
| 16   | 21,9 | 0,5 | 4  | 2 | 20 | 2013 |
| 15,6 | 20,3 | 0,5 | 10 | 2 | 18 | 2007 |
| 13,2 | 12,3 | 0,5 | 6  | 2 | 21 | 2009 |
| 13,2 | 12,3 | 0,5 | 2  | 2 | 19 | 2012 |
| 12,4 | 10,2 | 0,5 | 3  | 2 | 26 | 2006 |
| 12,4 | 10,2 | 0,5 | 2  | 2 | 26 | 2006 |
| 12,4 | 10,2 | 0,5 | 2  | 2 | 20 | 2013 |
| 16,4 | 23,6 | 0,5 | 6  | 2 | 20 | 2013 |
| 14,1 | 15   | 0,5 | 3  | 2 | 21 | 2009 |
| 14,7 | 17   | 0,5 | 3  | 2 | 19 | 2015 |
| 17   | 26,3 | 0,5 | 4  | 2 | 19 | 2010 |
| 17   | 26,3 | 0,5 | 4  | 2 | 19 | 2010 |
| 15,2 | 18,8 | 0,5 | 5  | 2 | 25 | 2004 |
| 13,3 | 12,6 | 0,5 | 2  | 2 | 23 | 2010 |
| 13,3 | 12,6 | 0,5 | 3  | 2 | 23 | 2010 |

|      |      |     |   |   |    |      |
|------|------|-----|---|---|----|------|
| 13,3 | 12,6 | 0,5 | 2 | 2 | 23 | 2010 |
| 13,3 | 12,6 | 0,5 | 3 | 2 | 23 | 2010 |
| 13,3 | 12,6 | 0,5 | 2 | 2 | 20 | 2013 |
| 14   | 14,7 | 0,5 | 3 | 2 | 23 | 2011 |
| 14   | 14,7 | 0,5 | 3 | 2 | 21 | 2015 |
| 15,3 | 19,2 | 0,5 | 4 | 2 | 20 | 1999 |
| 13,4 | 12,9 | 0,5 | 3 | 2 | 19 | 2015 |
| 13,9 | 14,4 | 0,5 | 2 | 2 | 19 | 2013 |
| 18,1 | 31,8 | 0,5 | 5 | 2 | 17 | 2014 |
| 15   | 18,1 | 0,5 | 5 | 2 | 19 | 2000 |
| 15   | 18,1 | 0,5 | 7 | 2 | 22 | 2009 |
| 15   | 18,1 | 0,5 | 6 | 2 | 20 | 2011 |
| 15   | 18,1 | 0,5 | 9 | 2 | 21 | 2014 |
| 15   | 18,1 | 0,5 | 9 | 2 | 23 | 2014 |
| 13,5 | 13,2 | 0,5 | 2 | 2 | 23 | 2001 |
| 14,6 | 16,7 | 0,5 | 3 | 2 | 20 | 2012 |
| 14,6 | 16,7 | 0,5 | 3 | 2 | 18 | 2015 |
| 15,4 | 19,6 | 0,5 | 3 | 2 | 25 | 2003 |
| 13,6 | 13,5 | 0,5 | 2 | 2 | 21 | 2008 |
| 13,7 | 13,8 | 0,5 | 2 | 2 | 20 | 2001 |
| 13,7 | 13,8 | 0,5 | 3 | 2 | 23 | 2003 |
| 14,8 | 17,4 | 0,5 | 4 | 2 | 20 | 2012 |
| 12,7 | 11   | 0,5 | 2 | 2 | 23 | 2009 |
| 15,5 | 20   | 0,5 | 3 | 2 | 22 | 2003 |
| 13   | 11,8 | 0,5 | 2 | 2 | 21 | 2005 |
| 13   | 11,8 | 0,5 | 2 | 2 | 20 | 2007 |
| 13   | 11,8 | 0,5 | 2 | 2 | 21 | 2010 |
| 13   | 11,8 | 0,5 | 2 | 2 | 21 | 2010 |

|      |      |     |   |   |    |      |
|------|------|-----|---|---|----|------|
| 13   | 11,8 | 0,5 | 2 | 2 | 20 | 2012 |
| 16,4 | 23,7 | 0,5 | 5 | 2 | 20 | 2009 |
| 15,1 | 18,5 | 0,5 | 4 | 2 | 21 | 2009 |
| 15,1 | 18,5 | 0,5 | 3 | 2 | 20 | 2012 |
| 15,6 | 20,4 | 0,5 | 3 | 2 | 23 | 2003 |
| 15,6 | 20,4 | 0,5 | 5 | 2 | 19 | 2010 |
| 15,6 | 20,4 | 0,5 | 5 | 2 | 19 | 2010 |
| 15,9 | 21,6 | 0,5 | 4 | 2 | 20 | 2001 |
| 21   | 49,8 | 0,5 | 6 | 2 | 16 | 2015 |
| 16,6 | 24,6 | 0,5 | 6 | 2 | 20 | 2013 |
| 16,8 | 25,5 | 0,5 | 6 | 2 | 19 | 2004 |
| 14,2 | 15,4 | 0,5 | 3 | 2 | 23 | 2009 |
| 14,5 | 16,4 | 0,5 | 3 | 2 | 19 | 1999 |
| 14,5 | 16,4 | 0,5 | 2 | 2 | 21 | 2001 |
| 14,5 | 16,4 | 0,5 | 2 | 2 | 18 | 2002 |
| 14,9 | 17,8 | 0,5 | 3 | 2 | 18 | 2008 |
| 15,2 | 18,9 | 0,5 | 4 | 2 | 19 | 2000 |
| 12   | 9,3  | 0,5 | 2 | 2 | 18 | 2007 |
| 13,1 | 12,1 | 0,5 | 2 | 2 | 21 | 2006 |
| 14,7 | 17,1 | 0,5 | 2 | 2 | 19 | 2001 |
| 18,3 | 33   | 0,5 | 6 | 2 | 20 | 2013 |
| 16,2 | 22,9 | 0,5 | 3 | 2 | 21 | 2010 |
| 16,2 | 22,9 | 0,5 | 3 | 2 | 21 | 2010 |
| 16,9 | 26   | 0,5 | 4 | 2 | 17 | 2009 |
| 14,1 | 15,1 | 0,5 | 6 | 2 | 26 | 2006 |
| 14,1 | 15,1 | 0,5 | 4 | 2 | 23 | 2009 |
| 16,5 | 24,2 | 0,5 | 3 | 2 | 18 | 2001 |
| 10,7 | 6,6  | 0,5 | 2 | 2 | 23 | 2004 |

|      |      |     |   |   |    |      |
|------|------|-----|---|---|----|------|
| 12,8 | 11,3 | 0,5 | 2 | 2 | 19 | 2009 |
| 15,3 | 19,3 | 0,5 | 3 | 2 | 19 | 2015 |
| 13,2 | 12,4 | 0,5 | 2 | 2 | 21 | 2009 |
| 13,2 | 12,4 | 0,5 | 2 | 2 | 20 | 2013 |
| 17,5 | 28,9 | 0,5 | 6 | 2 | 18 | 2015 |
| 15   | 18,2 | 0,5 | 3 | 2 | 20 | 2003 |
| 15   | 18,2 | 0,5 | 3 | 2 | 19 | 2010 |
| 15   | 18,2 | 0,5 | 9 | 2 | 19 | 2010 |
| 15   | 18,2 | 0,5 | 3 | 2 | 19 | 2010 |
| 15   | 18,2 | 0,5 | 9 | 2 | 19 | 2010 |
| 15   | 18,2 | 0,5 | 3 | 2 | 19 | 2015 |
| 14   | 14,8 | 0,5 | 3 | 2 | 17 | 2008 |
| 14   | 14,8 | 0,5 | 4 | 2 | 26 | 2009 |
| 17   | 26,5 | 0,5 | 4 | 2 | 15 | 2015 |
| 17   | 26,5 | 0,5 | 4 | 2 | 18 | 2015 |
| 15,4 | 19,7 | 0,5 | 5 | 2 | 20 | 2000 |
| 15,4 | 19,7 | 0,5 | 3 | 2 | 21 | 2001 |
| 15,4 | 19,7 | 0,5 | 4 | 2 | 18 | 2015 |
| 15,5 | 20,1 | 0,5 | 3 | 2 | 20 | 2001 |
| 15,5 | 20,1 | 0,5 | 8 | 2 | 15 | 2015 |
| 12,6 | 10,8 | 0,5 | 3 | 2 | 22 | 2005 |
| 13,9 | 14,5 | 0,5 | 2 | 2 | 19 | 2008 |
| 11,4 | 8    | 0,5 | 2 | 2 | 20 | 2004 |
| 11,4 | 8    | 0,5 | 2 | 2 | 18 | 2007 |
| 15,8 | 21,3 | 0,5 | 4 | 2 | 15 | 2015 |
| 13,4 | 13   | 0,5 | 2 | 2 | 19 | 2009 |
| 14,3 | 15,8 | 0,5 | 3 | 2 | 19 | 2010 |
| 14,3 | 15,8 | 0,5 | 3 | 2 | 19 | 2010 |

|      |      |     |   |   |    |      |
|------|------|-----|---|---|----|------|
| 13,8 | 14,2 | 0,5 | 3 | 2 | 20 | 2004 |
| 16,3 | 23,4 | 0,5 | 6 | 2 | 23 | 2001 |
| 12,9 | 11,6 | 0,5 | 2 | 2 | 20 | 2012 |
| 13,5 | 13,3 | 0,5 | 2 | 2 | 20 | 2013 |
| 13,7 | 13,9 | 0,5 | 3 | 2 | 20 | 2007 |
| 13,7 | 13,9 | 0,5 | 3 | 2 | 22 | 2007 |
| 13,7 | 13,9 | 0,5 | 3 | 2 | 23 | 2010 |
| 13,7 | 13,9 | 0,5 | 3 | 2 | 23 | 2010 |
| 13,6 | 13,6 | 0,5 | 2 | 2 | 20 | 2007 |
| 13,6 | 13,6 | 0,5 | 2 | 2 | 19 | 2013 |
| 16,2 | 23   | 0,5 | 4 | 2 | 19 | 2012 |
| 15,2 | 19   | 0,5 | 4 | 2 | 25 | 2004 |
| 15,2 | 19   | 0,5 | 4 | 2 | 22 | 2011 |
| 17,6 | 29,5 | 0,5 | 7 | 2 | 19 | 2011 |
| 14,9 | 17,9 | 0,5 | 3 | 2 | 19 | 2009 |
| 14,5 | 16,5 | 0,5 | 8 | 2 | 20 | 2004 |
| 14,5 | 16,5 | 0,5 | 6 | 2 | 26 | 2006 |
| 14,2 | 15,5 | 0,5 | 2 | 2 | 18 | 2002 |
| 17   | 26,6 | 0,5 | 4 | 2 | 16 | 2015 |
| 13   | 11,9 | 0,5 | 2 | 2 | 18 | 2002 |
| 13   | 11,9 | 0,5 | 3 | 2 | 22 | 2005 |
| 13   | 11,9 | 0,5 | 2 | 2 | 20 | 2007 |
| 13   | 11,9 | 0,5 | 3 | 2 | 17 | 2014 |
| 15,3 | 19,4 | 0,5 | 5 | 2 | 21 | 2010 |
| 15,3 | 19,4 | 0,5 | 5 | 2 | 21 | 2010 |
| 15,3 | 19,4 | 0,5 | 6 | 2 | 21 | 2011 |
| 15,3 | 19,4 | 0,5 | 4 | 2 | 23 | 2011 |
| 11,8 | 8,9  | 0,5 | 2 | 2 | 21 | 2005 |

|      |      |     |   |   |    |      |
|------|------|-----|---|---|----|------|
| 12,7 | 11,1 | 0,5 | 2 | 2 | 21 | 2006 |
| 16   | 22,2 | 0,5 | 6 | 2 | 21 | 2014 |
| 16,6 | 24,8 | 0,5 | 3 | 2 | 16 | 2015 |
| 15   | 18,3 | 0,5 | 5 | 2 | 20 | 2007 |
| 15   | 18,3 | 0,5 | 3 | 2 | 19 | 2008 |
| 15   | 18,3 | 0,5 | 3 | 2 | 18 | 2012 |
| 15   | 18,3 | 0,5 | 5 | 2 | 19 | 2013 |
| 15,5 | 20,2 | 0,5 | 7 | 2 | 19 | 2009 |
| 14,4 | 16,2 | 0,5 | 3 | 2 | 15 | 2015 |
| 15,8 | 21,4 | 0,5 | 3 | 2 | 17 | 2002 |
| 15,6 | 20,6 | 0,5 | 3 | 2 | 21 | 2010 |
| 15,6 | 20,6 | 0,5 | 3 | 2 | 21 | 2010 |
| 15,7 | 21   | 0,5 | 9 | 2 | 25 | 2004 |
| 15,7 | 21   | 0,5 | 3 | 2 | 22 | 2005 |
| 13,1 | 12,2 | 0,5 | 2 | 2 | 20 | 2013 |
| 14,8 | 17,6 | 0,5 | 4 | 2 | 22 | 2009 |
| 17,5 | 29,1 | 0,5 | 5 | 2 | 19 | 2010 |
| 17,5 | 29,1 | 0,5 | 5 | 2 | 19 | 2010 |
| 14   | 14,9 | 0,5 | 2 | 2 | 19 | 2013 |
| 14,6 | 16,9 | 0,5 | 3 | 2 | 26 | 2003 |
| 16,7 | 25,3 | 0,5 | 4 | 2 | 19 | 2001 |
| 16,7 | 25,3 | 0,5 | 4 | 2 | 20 | 2004 |
| 13,2 | 12,5 | 0,5 | 3 | 2 | 20 | 2007 |
| 13,9 | 14,6 | 0,5 | 5 | 2 | 25 | 2007 |
| 15,2 | 19,1 | 0,5 | 5 | 2 | 20 | 2007 |
| 15,2 | 19,1 | 0,5 | 3 | 2 | 18 | 2014 |
| 16,1 | 22,7 | 0,5 | 3 | 2 | 18 | 2002 |
| 16,1 | 22,7 | 0,5 | 4 | 2 | 17 | 2014 |

|      |      |     |   |   |    |      |
|------|------|-----|---|---|----|------|
| 13,8 | 14,3 | 0,5 | 3 | 2 | 22 | 2007 |
| 13,8 | 14,3 | 0,5 | 3 | 2 | 23 | 2010 |
| 13,8 | 14,3 | 0,5 | 3 | 2 | 23 | 2010 |
| 13,4 | 13,1 | 0,5 | 5 | 2 | 23 | 2010 |
| 13,4 | 13,1 | 0,5 | 5 | 2 | 23 | 2010 |
| 15,3 | 19,5 | 0,5 | 6 | 2 | 19 | 2010 |
| 15,3 | 19,5 | 0,5 | 6 | 2 | 19 | 2010 |
| 13,7 | 14   | 0,5 | 3 | 2 | 20 | 2009 |
| 14,5 | 16,6 | 0,5 | 2 | 2 | 23 | 2001 |
| 14,5 | 16,6 | 0,5 | 4 | 2 | 21 | 2009 |
| 14,5 | 16,6 | 0,5 | 3 | 2 | 20 | 2010 |
| 14,5 | 16,6 | 0,5 | 3 | 2 | 20 | 2010 |
| 14,5 | 16,6 | 0,5 | 3 | 2 | 17 | 2014 |
| 13,5 | 13,4 | 0,5 | 3 | 2 | 26 | 2006 |
| 17,6 | 29,7 | 0,5 | 6 | 2 | 19 | 2000 |
| 14,2 | 15,6 | 0,5 | 3 | 2 | 23 | 2010 |
| 14,2 | 15,6 | 0,5 | 3 | 2 | 23 | 2010 |
| 17,5 | 29,2 | 0,5 | 8 | 2 | 16 | 2015 |
| 16,3 | 23,6 | 0,5 | 3 | 2 | 19 | 2001 |
| 16,3 | 23,6 | 0,5 | 4 | 2 | 19 | 2015 |
| 12,9 | 11,7 | 0,5 | 2 | 2 | 22 | 2009 |
| 12,9 | 11,7 | 0,5 | 7 | 2 | 23 | 2010 |
| 12,9 | 11,7 | 0,5 | 7 | 2 | 23 | 2010 |
| 15   | 18,4 | 0,5 | 4 | 2 | 25 | 2004 |
| 15   | 18,4 | 0,5 | 5 | 2 | 18 | 2007 |
| 15   | 18,4 | 0,5 | 3 | 2 | 20 | 2010 |
| 15   | 18,4 | 0,5 | 3 | 2 | 20 | 2010 |
| 12,2 | 9,9  | 0,5 | 2 | 2 | 20 | 2010 |

|      |      |     |   |   |    |      |
|------|------|-----|---|---|----|------|
| 12,2 | 9,9  | 0,5 | 2 | 2 | 20 | 2010 |
| 12,2 | 9,9  | 0,5 | 2 | 2 | 17 | 2014 |
| 15,6 | 20,7 | 0,5 | 4 | 2 | 19 | 2013 |
| 17   | 26,8 | 0,5 | 6 | 2 | 20 | 2004 |
| 16,2 | 23,2 | 0,5 | 3 | 2 | 19 | 2010 |
| 16,2 | 23,2 | 0,5 | 3 | 2 | 19 | 2010 |
| 14,1 | 15,3 | 0,5 | 4 | 2 | 19 | 2009 |
| 14,4 | 16,3 | 0,5 | 3 | 2 | 20 | 2010 |
| 14,4 | 16,3 | 0,5 | 3 | 2 | 20 | 2010 |
| 14,4 | 16,3 | 0,5 | 3 | 2 | 18 | 2015 |
| 14,8 | 17,7 | 0,5 | 9 | 2 | 25 | 2005 |
| 15,1 | 18,8 | 0,5 | 4 | 2 | 19 | 2008 |
| 15,1 | 18,8 | 0,5 | 4 | 2 | 22 | 2011 |
| 13   | 12   | 0,5 | 3 | 2 | 22 | 2007 |
| 13   | 12   | 0,5 | 4 | 2 | 23 | 2009 |
| 13   | 12   | 0,5 | 2 | 2 | 20 | 2013 |
| 16,8 | 25,9 | 0,5 | 5 | 2 | 19 | 1999 |
| 14,6 | 17   | 0,5 | 3 | 2 | 19 | 2010 |
| 14,6 | 17   | 0,5 | 3 | 2 | 19 | 2010 |
| 16,1 | 22,8 | 0,5 | 4 | 2 | 19 | 2004 |
| 16,4 | 24,1 | 0,5 | 6 | 2 | 24 | 2001 |
| 16,4 | 24,1 | 0,5 | 6 | 2 | 23 | 2005 |
| 14   | 15   | 0,5 | 2 | 2 | 20 | 2003 |
| 14   | 15   | 0,5 | 3 | 2 | 21 | 2003 |
| 14   | 15   | 0,5 | 3 | 2 | 19 | 2014 |
| 15,2 | 19,2 | 0,5 | 3 | 2 | 19 | 2002 |
| 16   | 22,4 | 0,5 | 7 | 2 | 26 | 2009 |
| 13,1 | 12,3 | 0,5 | 2 | 2 | 26 | 2006 |

|      |      |     |    |   |    |      |
|------|------|-----|----|---|----|------|
| 13,1 | 12,3 | 0,5 | 2  | 2 | 19 | 2013 |
| 14,9 | 18,1 | 0,5 | 4  | 2 | 26 | 2005 |
| 14,9 | 18,1 | 0,5 | 4  | 2 | 26 | 2006 |
| 15,3 | 19,6 | 0,5 | 5  | 2 | 25 | 2004 |
| 15,3 | 19,6 | 0,5 | 3  | 2 | 21 | 2010 |
| 15,3 | 19,6 | 0,5 | 3  | 2 | 21 | 2010 |
| 16,3 | 23,7 | 0,5 | 6  | 2 | 25 | 2003 |
| 15,9 | 22   | 0,5 | 5  | 2 | 20 | 2007 |
| 13,9 | 14,7 | 0,5 | 2  | 2 | 19 | 2013 |
| 13,9 | 14,7 | 0,5 | 3  | 2 | 19 | 2013 |
| 11,3 | 7,9  | 0,5 | 2  | 2 | 18 | 2014 |
| 14,7 | 17,4 | 0,5 | 4  | 2 | 22 | 2009 |
| 14,7 | 17,4 | 0,5 | 4  | 2 | 20 | 2011 |
| 14,7 | 17,4 | 0,5 | 4  | 2 | 18 | 2015 |
| 14,5 | 16,7 | 0,5 | 3  | 2 | 19 | 2001 |
| 14,5 | 16,7 | 0,5 | 3  | 2 | 21 | 2010 |
| 14,5 | 16,7 | 0,5 | 3  | 2 | 21 | 2010 |
| 15,7 | 21,2 | 0,5 | 3  | 2 | 22 | 2001 |
| 15,7 | 21,2 | 0,5 | 5  | 2 | 21 | 2009 |
| 13,2 | 12,6 | 0,5 | 2  | 2 | 19 | 2009 |
| 16,2 | 23,3 | 0,5 | 5  | 2 | 19 | 2014 |
| 17,7 | 30,4 | 0,5 | 5  | 2 | 19 | 2000 |
| 17,2 | 27,9 | 0,5 | 10 | 2 | 25 | 2007 |
| 14,2 | 15,7 | 0,5 | 3  | 2 | 19 | 2002 |
| 14,2 | 15,7 | 0,5 | 3  | 2 | 22 | 2005 |
| 14,2 | 15,7 | 0,5 | 3  | 2 | 18 | 2007 |
| 13,3 | 12,9 | 0,5 | 2  | 2 | 20 | 2002 |
| 13,3 | 12,9 | 0,5 | 2  | 2 | 19 | 2013 |

|      |      |     |   |   |    |      |
|------|------|-----|---|---|----|------|
| 13,3 | 12,9 | 0,5 | 2 | 2 | 20 | 2013 |
| 13,7 | 14,1 | 0,5 | 2 | 2 | 21 | 2003 |
| 11   | 7,3  | 0,5 | 1 | 2 | 18 | 2007 |
| 13,4 | 13,2 | 0,5 | 2 | 2 | 20 | 2010 |
| 13,4 | 13,2 | 0,5 | 2 | 2 | 20 | 2010 |
| 13,6 | 13,8 | 0,5 | 2 | 2 | 20 | 2001 |
| 16,4 | 24,2 | 0,5 | 3 | 2 | 23 | 2010 |
| 16,4 | 24,2 | 0,5 | 3 | 2 | 23 | 2010 |
| 13,5 | 13,5 | 0,5 | 3 | 2 | 19 | 2000 |
| 16,1 | 22,9 | 0,5 | 4 | 2 | 21 | 2014 |
| 14,8 | 17,8 | 0,5 | 3 | 2 | 21 | 2001 |
| 14,8 | 17,8 | 0,5 | 6 | 2 | 16 | 2008 |
| 14,8 | 17,8 | 0,5 | 3 | 2 | 22 | 2011 |
| 14,1 | 15,4 | 0,5 | 3 | 2 | 20 | 2010 |
| 14,1 | 15,4 | 0,5 | 3 | 2 | 20 | 2010 |
| 14,1 | 15,4 | 0,5 | 3 | 2 | 18 | 2014 |
| 11,7 | 8,8  | 0,5 | 2 | 2 | 23 | 2004 |
| 14,6 | 17,1 | 0,5 | 5 | 2 | 20 | 2004 |
| 15,2 | 19,3 | 0,5 | 4 | 2 | 22 | 2011 |
| 12,9 | 11,8 | 0,5 | 2 | 2 | 18 | 2007 |
| 12   | 9,5  | 0,5 | 2 | 2 | 21 | 2005 |
| 16,5 | 24,7 | 0,5 | 4 | 2 | 19 | 2004 |
| 12,6 | 11   | 0,5 | 2 | 2 | 19 | 2013 |
| 17,6 | 30   | 0,6 | 6 | 2 | 20 | 2013 |
| 14   | 15,1 | 0,6 | 2 | 2 | 20 | 2000 |
| 14   | 15,1 | 0,6 | 3 | 2 | 22 | 2005 |
| 14   | 15,1 | 0,6 | 3 | 2 | 20 | 2007 |
| 14   | 15,1 | 0,6 | 3 | 2 | 20 | 2008 |

|      |      |     |   |   |    |      |
|------|------|-----|---|---|----|------|
| 14   | 15,1 | 0,6 | 3 | 2 | 22 | 2011 |
| 14   | 15,1 | 0,6 | 3 | 2 | 19 | 2015 |
| 15,4 | 20,1 | 0,6 | 5 | 2 | 20 | 2010 |
| 15,4 | 20,1 | 0,6 | 5 | 2 | 20 | 2010 |
| 15,6 | 20,9 | 0,6 | 3 | 2 | 21 | 2003 |
| 12,2 | 10   | 0,6 | 2 | 2 | 19 | 2007 |
| 12,4 | 10,5 | 0,6 | 2 | 2 | 17 | 2014 |
| 13   | 12,1 | 0,6 | 2 | 2 | 20 | 2000 |
| 13   | 12,1 | 0,6 | 3 | 2 | 21 | 2005 |
| 13   | 12,1 | 0,6 | 2 | 2 | 23 | 2006 |
| 13   | 12,1 | 0,6 | 3 | 2 | 23 | 2010 |
| 13   | 12,1 | 0,6 | 3 | 2 | 23 | 2010 |
| 16,4 | 24,3 | 0,6 | 4 | 2 | 18 | 2001 |
| 14,7 | 17,5 | 0,6 | 2 | 2 | 21 | 2001 |
| 14,7 | 17,5 | 0,6 | 3 | 2 | 25 | 2004 |
| 14,7 | 17,5 | 0,6 | 2 | 2 | 23 | 2010 |
| 14,7 | 17,5 | 0,6 | 2 | 2 | 23 | 2010 |
| 17,9 | 31,6 | 0,6 | 4 | 2 | 18 | 2015 |
| 13,9 | 14,8 | 0,6 | 2 | 2 | 21 | 2006 |
| 13,9 | 14,8 | 0,6 | 2 | 2 | 19 | 2013 |
| 15   | 18,6 | 0,6 | 3 | 2 | 23 | 2001 |
| 15   | 18,6 | 0,6 | 4 | 2 | 19 | 2009 |
| 16,1 | 23   | 0,6 | 8 | 2 | 23 | 2015 |
| 13,1 | 12,4 | 0,6 | 3 | 2 | 21 | 2008 |
| 17   | 27,1 | 0,6 | 6 | 2 | 19 | 2004 |
| 12,7 | 11,3 | 0,6 | 3 | 2 | 16 | 2015 |
| 13,8 | 14,5 | 0,6 | 2 | 2 | 20 | 2001 |
| 13,8 | 14,5 | 0,6 | 2 | 2 | 23 | 2001 |

|      |      |     |   |   |    |      |
|------|------|-----|---|---|----|------|
| 14,2 | 15,8 | 0,6 | 4 | 2 | 20 | 2001 |
| 14,2 | 15,8 | 0,6 | 5 | 2 | 22 | 2007 |
| 14,2 | 15,8 | 0,6 | 3 | 2 | 19 | 2010 |
| 14,2 | 15,8 | 0,6 | 3 | 2 | 19 | 2010 |
| 14,2 | 15,8 | 0,6 | 7 | 2 | 21 | 2014 |
| 14,2 | 15,8 | 0,6 | 7 | 2 | 23 | 2014 |
| 15,1 | 19   | 0,6 | 3 | 2 | 20 | 2010 |
| 15,1 | 19   | 0,6 | 3 | 2 | 20 | 2010 |
| 15,1 | 19   | 0,6 | 4 | 2 | 15 | 2015 |
| 14,8 | 17,9 | 0,6 | 2 | 2 | 23 | 2001 |
| 14,8 | 17,9 | 0,6 | 3 | 2 | 22 | 2007 |
| 14,8 | 17,9 | 0,6 | 3 | 2 | 19 | 2010 |
| 14,8 | 17,9 | 0,6 | 3 | 2 | 19 | 2010 |
| 14,8 | 17,9 | 0,6 | 3 | 2 | 18 | 2015 |
| 13,2 | 12,7 | 0,6 | 2 | 2 | 22 | 2009 |
| 13,2 | 12,7 | 0,6 | 4 | 2 | 23 | 2009 |
| 13,7 | 14,2 | 0,6 | 3 | 2 | 23 | 2010 |
| 13,7 | 14,2 | 0,6 | 2 | 2 | 23 | 2010 |
| 13,7 | 14,2 | 0,6 | 3 | 2 | 23 | 2010 |
| 13,7 | 14,2 | 0,6 | 2 | 2 | 23 | 2010 |
| 15,9 | 22,2 | 0,6 | 4 | 2 | 20 | 2011 |
| 19   | 37,9 | 0,6 | 5 | 2 | 19 | 2013 |
| 13,3 | 13   | 0,6 | 2 | 2 | 23 | 2003 |
| 13,6 | 13,9 | 0,6 | 3 | 2 | 22 | 2005 |
| 13,6 | 13,9 | 0,6 | 2 | 2 | 20 | 2010 |
| 13,6 | 13,9 | 0,6 | 2 | 2 | 20 | 2010 |
| 14,6 | 17,2 | 0,6 | 3 | 2 | 19 | 1999 |
| 16,2 | 23,5 | 0,6 | 5 | 2 | 17 | 2009 |

|      |      |     |   |   |    |      |
|------|------|-----|---|---|----|------|
| 13,4 | 13,3 | 0,6 | 3 | 2 | 25 | 2004 |
| 13,4 | 13,3 | 0,6 | 3 | 2 | 26 | 2009 |
| 13,5 | 13,6 | 0,6 | 2 | 2 | 20 | 2000 |
| 14,1 | 15,5 | 0,6 | 4 | 2 | 20 | 2008 |
| 14,1 | 15,5 | 0,6 | 3 | 2 | 20 | 2012 |
| 16,6 | 25,3 | 0,6 | 4 | 2 | 19 | 2015 |
| 16,4 | 24,4 | 0,6 | 5 | 2 | 20 | 1999 |
| 12,1 | 9,8  | 0,6 | 2 | 2 | 20 | 2000 |
| 12,1 | 9,8  | 0,6 | 3 | 2 | 21 | 2005 |
| 12,1 | 9,8  | 0,6 | 2 | 2 | 26 | 2006 |
| 15,5 | 20,6 | 0,6 | 4 | 2 | 19 | 2015 |
| 14,9 | 18,3 | 0,6 | 4 | 2 | 20 | 2008 |
| 12,3 | 10,3 | 0,6 | 2 | 2 | 26 | 2006 |
| 12,3 | 10,3 | 0,6 | 2 | 2 | 26 | 2006 |
| 16,1 | 23,1 | 0,6 | 6 | 2 | 19 | 1999 |
| 14   | 15,2 | 0,6 | 3 | 2 | 23 | 2010 |
| 14   | 15,2 | 0,6 | 3 | 2 | 23 | 2010 |
| 14   | 15,2 | 0,6 | 3 | 2 | 23 | 2011 |
| 14   | 15,2 | 0,6 | 4 | 2 | 19 | 2013 |
| 14,3 | 16,2 | 0,6 | 4 | 2 | 23 | 2010 |
| 14,3 | 16,2 | 0,6 | 4 | 2 | 23 | 2010 |
| 14,3 | 16,2 | 0,6 | 3 | 2 | 18 | 2015 |
| 15   | 18,7 | 0,6 | 4 | 2 | 19 | 2004 |
| 12,9 | 11,9 | 0,6 | 2 | 2 | 17 | 2002 |
| 14,5 | 16,9 | 0,6 | 4 | 2 | 20 | 1999 |
| 14,5 | 16,9 | 0,6 | 2 | 2 | 18 | 2002 |
| 15,1 | 19,1 | 0,6 | 3 | 2 | 17 | 2014 |
| 13,9 | 14,9 | 0,6 | 3 | 2 | 17 | 2014 |

|      |      |     |   |   |    |      |
|------|------|-----|---|---|----|------|
| 12,6 | 11,1 | 0,6 | 2 | 2 | 20 | 2013 |
| 15,8 | 21,9 | 0,6 | 5 | 2 | 26 | 2006 |
| 15,8 | 21,9 | 0,6 | 5 | 2 | 18 | 2007 |
| 14,8 | 18   | 0,6 | 4 | 2 | 23 | 1999 |
| 14,8 | 18   | 0,6 | 2 | 2 | 17 | 2009 |
| 15,2 | 19,5 | 0,6 | 6 | 2 | 19 | 2012 |
| 13   | 12,2 | 0,6 | 3 | 2 | 22 | 2005 |
| 13   | 12,2 | 0,6 | 3 | 2 | 19 | 2007 |
| 13   | 12,2 | 0,6 | 2 | 2 | 19 | 2013 |
| 13   | 12,2 | 0,6 | 2 | 2 | 19 | 2013 |
| 16,4 | 24,5 | 0,6 | 3 | 2 | 25 | 2003 |
| 13,8 | 14,6 | 0,6 | 4 | 2 | 19 | 2009 |
| 13,8 | 14,6 | 0,6 | 2 | 2 | 23 | 2010 |
| 13,8 | 14,6 | 0,6 | 2 | 2 | 23 | 2010 |
| 13,8 | 14,6 | 0,6 | 3 | 2 | 19 | 2013 |
| 12   | 9,6  | 0,6 | 2 | 2 | 26 | 2006 |
| 12   | 9,6  | 0,6 | 2 | 2 | 18 | 2007 |
| 12   | 9,6  | 0,6 | 2 | 2 | 20 | 2007 |
| 15,3 | 19,9 | 0,6 | 3 | 2 | 22 | 2003 |
| 15,3 | 19,9 | 0,6 | 4 | 2 | 26 | 2003 |
| 15,4 | 20,3 | 0,6 | 3 | 2 | 23 | 2003 |
| 15,5 | 20,7 | 0,6 | 4 | 2 | 19 | 2008 |
| 14,6 | 17,3 | 0,6 | 5 | 2 | 18 | 2007 |
| 14,4 | 16,6 | 0,6 | 2 | 2 | 18 | 2002 |
| 14,4 | 16,6 | 0,6 | 4 | 2 | 25 | 2004 |
| 13,1 | 12,5 | 0,6 | 2 | 2 | 17 | 2008 |
| 13,1 | 12,5 | 0,6 | 2 | 2 | 19 | 2013 |
| 16,7 | 25,9 | 0,6 | 5 | 2 | 20 | 2009 |

|      |      |     |   |   |    |      |
|------|------|-----|---|---|----|------|
| 13,7 | 14,3 | 0,6 | 3 | 2 | 25 | 2004 |
| 17,4 | 29,3 | 0,6 | 9 | 2 | 20 | 2004 |
| 12,2 | 10,1 | 0,6 | 2 | 2 | 19 | 2002 |
| 16,3 | 24,1 | 0,6 | 7 | 2 | 21 | 2014 |
| 14,1 | 15,6 | 0,6 | 2 | 2 | 17 | 2014 |
| 13,2 | 12,8 | 0,6 | 2 | 2 | 21 | 2009 |
| 12,7 | 11,4 | 0,6 | 2 | 2 | 20 | 2013 |
| 13,6 | 14   | 0,6 | 3 | 2 | 19 | 2013 |
| 13,3 | 13,1 | 0,6 | 3 | 2 | 25 | 2004 |
| 13,3 | 13,1 | 0,6 | 3 | 2 | 22 | 2005 |
| 13,5 | 13,7 | 0,6 | 2 | 2 | 20 | 2002 |
| 13,5 | 13,7 | 0,6 | 4 | 2 | 22 | 2011 |
| 13,4 | 13,4 | 0,6 | 2 | 2 | 19 | 2006 |
| 13,4 | 13,4 | 0,6 | 3 | 2 | 19 | 2015 |
| 15   | 18,8 | 0,6 | 4 | 2 | 18 | 2015 |
| 14,7 | 17,7 | 0,6 | 5 | 2 | 19 | 1999 |
| 14,7 | 17,7 | 0,6 | 3 | 2 | 21 | 2001 |
| 14,7 | 17,7 | 0,6 | 3 | 2 | 20 | 2003 |
| 14,7 | 17,7 | 0,6 | 4 | 2 | 18 | 2014 |
| 16,9 | 26,9 | 0,6 | 4 | 2 | 16 | 2008 |
| 14,3 | 16,3 | 0,6 | 2 | 2 | 21 | 2003 |
| 16,2 | 23,7 | 0,6 | 6 | 2 | 20 | 2011 |
| 16,2 | 23,7 | 0,6 | 7 | 2 | 21 | 2014 |
| 16,6 | 25,5 | 0,6 | 5 | 2 | 19 | 1999 |
| 14   | 15,3 | 0,6 | 2 | 2 | 21 | 2001 |
| 14   | 15,3 | 0,6 | 4 | 2 | 23 | 2009 |
| 14   | 15,3 | 0,6 | 7 | 2 | 26 | 2009 |
| 14   | 15,3 | 0,6 | 3 | 2 | 20 | 2010 |

|      |      |     |    |   |    |      |
|------|------|-----|----|---|----|------|
| 14   | 15,3 | 0,6 | 3  | 2 | 20 | 2010 |
| 14   | 15,3 | 0,6 | 2  | 2 | 19 | 2012 |
| 14   | 15,3 | 0,6 | 3  | 2 | 23 | 2015 |
| 14,5 | 17   | 0,6 | 3  | 2 | 19 | 1999 |
| 14,5 | 17   | 0,6 | 4  | 2 | 21 | 2009 |
| 14,5 | 17   | 0,6 | 4  | 2 | 18 | 2015 |
| 15,1 | 19,2 | 0,6 | 4  | 2 | 21 | 2011 |
| 15,1 | 19,2 | 0,6 | 4  | 2 | 19 | 2012 |
| 15,1 | 19,2 | 0,6 | 3  | 2 | 17 | 2014 |
| 15,8 | 22   | 0,6 | 3  | 2 | 18 | 2000 |
| 15,8 | 22   | 0,6 | 3  | 2 | 19 | 2011 |
| 12,8 | 11,7 | 0,6 | 2  | 2 | 23 | 2007 |
| 15,2 | 19,6 | 0,6 | 3  | 2 | 18 | 2001 |
| 15,2 | 19,6 | 0,6 | 3  | 2 | 23 | 2001 |
| 15,2 | 19,6 | 0,6 | 10 | 2 | 26 | 2006 |
| 15,2 | 19,6 | 0,6 | 3  | 2 | 21 | 2010 |
| 15,2 | 19,6 | 0,6 | 3  | 2 | 21 | 2010 |
| 10,3 | 6,1  | 0,6 | 2  | 2 | 23 | 2004 |
| 13,9 | 15   | 0,6 | 3  | 2 | 20 | 2008 |
| 13,9 | 15   | 0,6 | 2  | 2 | 19 | 2014 |
| 17,8 | 31,5 | 0,6 | 3  | 2 | 21 | 2015 |
| 15,5 | 20,8 | 0,6 | 3  | 2 | 17 | 2014 |
| 18,4 | 34,8 | 0,6 | 4  | 2 | 16 | 2015 |
| 14,2 | 16   | 0,6 | 3  | 2 | 23 | 2010 |
| 14,2 | 16   | 0,6 | 3  | 2 | 23 | 2010 |
| 11,5 | 8,5  | 0,6 | 2  | 2 | 20 | 2004 |
| 12,9 | 12   | 0,6 | 2  | 2 | 18 | 2014 |
| 18,2 | 33,7 | 0,6 | 10 | 2 | 23 | 2010 |

|      |      |     |    |   |    |      |
|------|------|-----|----|---|----|------|
| 18,2 | 33,7 | 0,6 | 10 | 2 | 23 | 2010 |
| 16   | 22,9 | 0,6 | 6  | 2 | 20 | 2004 |
| 14,6 | 17,4 | 0,6 | 2  | 2 | 19 | 2014 |
| 14,9 | 18,5 | 0,6 | 5  | 2 | 19 | 2012 |
| 14,9 | 18,5 | 0,6 | 4  | 2 | 17 | 2014 |
| 14,4 | 16,7 | 0,6 | 4  | 2 | 22 | 2011 |
| 13,8 | 14,7 | 0,6 | 2  | 2 | 19 | 2013 |
| 13,8 | 14,7 | 0,6 | 3  | 2 | 18 | 2014 |
| 17   | 27,5 | 0,6 | 8  | 2 | 23 | 2008 |
| 15,9 | 22,5 | 0,6 | 3  | 2 | 17 | 2012 |
| 16,2 | 23,8 | 0,6 | 3  | 2 | 21 | 2001 |
| 13   | 12,3 | 0,6 | 2  | 2 | 21 | 2000 |
| 13   | 12,3 | 0,6 | 3  | 2 | 18 | 2008 |
| 13   | 12,3 | 0,6 | 2  | 2 | 22 | 2009 |
| 15   | 18,9 | 0,6 | 4  | 2 | 22 | 2004 |
| 15   | 18,9 | 0,6 | 3  | 2 | 20 | 2007 |
| 13,7 | 14,4 | 0,6 | 3  | 2 | 18 | 2014 |
| 14,1 | 15,7 | 0,6 | 3  | 2 | 19 | 2002 |
| 15,8 | 22,1 | 0,6 | 3  | 2 | 21 | 2001 |
| 15,8 | 22,1 | 0,6 | 7  | 2 | 26 | 2005 |
| 15,8 | 22,1 | 0,6 | 5  | 2 | 19 | 2010 |
| 15,8 | 22,1 | 0,6 | 5  | 2 | 19 | 2010 |
| 15,8 | 22,1 | 0,6 | 4  | 2 | 17 | 2014 |
| 14,7 | 17,8 | 0,6 | 6  | 2 | 22 | 2003 |
| 14,7 | 17,8 | 0,6 | 4  | 2 | 19 | 2015 |
| 16,7 | 26,1 | 0,6 | 5  | 2 | 18 | 2000 |
| 16,7 | 26,1 | 0,6 | 5  | 2 | 21 | 2010 |
| 16,7 | 26,1 | 0,6 | 5  | 2 | 21 | 2010 |

|      |      |     |   |   |    |      |
|------|------|-----|---|---|----|------|
| 16,7 | 26,1 | 0,6 | 8 | 2 | 22 | 2015 |
| 13,1 | 12,6 | 0,6 | 2 | 2 | 18 | 2008 |
| 13,1 | 12,6 | 0,6 | 2 | 2 | 23 | 2009 |
| 13,1 | 12,6 | 0,6 | 2 | 2 | 20 | 2013 |
| 13,1 | 12,6 | 0,6 | 2 | 2 | 20 | 2013 |
| 15,1 | 19,3 | 0,6 | 4 | 2 | 21 | 2000 |
| 15,7 | 21,7 | 0,6 | 7 | 2 | 22 | 2009 |
| 15,7 | 21,7 | 0,6 | 4 | 2 | 22 | 2011 |
| 14,3 | 16,4 | 0,6 | 2 | 2 | 23 | 2001 |
| 14,3 | 16,4 | 0,6 | 4 | 2 | 21 | 2009 |
| 14,3 | 16,4 | 0,6 | 3 | 2 | 19 | 2015 |
| 13,2 | 12,9 | 0,6 | 2 | 2 | 20 | 2013 |
| 14,5 | 17,1 | 0,6 | 5 | 2 | 25 | 2004 |
| 14,5 | 17,1 | 0,6 | 6 | 2 | 18 | 2008 |
| 15,2 | 19,7 | 0,6 | 6 | 2 | 20 | 2008 |
| 13,4 | 13,5 | 0,6 | 4 | 2 | 21 | 2000 |
| 13,4 | 13,5 | 0,6 | 2 | 2 | 19 | 2013 |
| 16,3 | 24,3 | 0,6 | 5 | 2 | 18 | 1999 |
| 16,3 | 24,3 | 0,6 | 5 | 2 | 21 | 2010 |
| 16,3 | 24,3 | 0,6 | 5 | 2 | 21 | 2010 |
| 12,4 | 10,7 | 0,6 | 2 | 2 | 23 | 2006 |
| 15,3 | 20,1 | 0,6 | 4 | 2 | 19 | 1999 |
| 15,3 | 20,1 | 0,6 | 7 | 2 | 19 | 2012 |
| 14   | 15,4 | 0,6 | 4 | 2 | 19 | 2009 |
| 14   | 15,4 | 0,6 | 2 | 2 | 18 | 2014 |
| 14   | 15,4 | 0,6 | 3 | 2 | 19 | 2014 |
| 15,5 | 20,9 | 0,6 | 6 | 2 | 20 | 2013 |
| 15,4 | 20,5 | 0,6 | 5 | 2 | 19 | 2001 |

|      |      |     |   |   |    |      |
|------|------|-----|---|---|----|------|
| 15,4 | 20,5 | 0,6 | 3 | 2 | 15 | 2015 |
| 11,3 | 8,1  | 0,6 | 2 | 2 | 20 | 2004 |
| 14,8 | 18,2 | 0,6 | 3 | 2 | 23 | 2001 |
| 14,8 | 18,2 | 0,6 | 2 | 2 | 26 | 2003 |
| 14,8 | 18,2 | 0,6 | 3 | 2 | 25 | 2004 |
| 12,7 | 11,5 | 0,6 | 3 | 2 | 23 | 2010 |
| 12,7 | 11,5 | 0,6 | 3 | 2 | 23 | 2010 |
| 12,7 | 11,5 | 0,6 | 2 | 2 | 21 | 2014 |
| 12,2 | 10,2 | 0,6 | 2 | 2 | 21 | 2005 |
| 12,2 | 10,2 | 0,6 | 2 | 2 | 20 | 2008 |
| 11,7 | 9    | 0,6 | 2 | 2 | 20 | 2002 |
| 16,2 | 23,9 | 0,6 | 4 | 2 | 23 | 2001 |
| 13,9 | 15,1 | 0,6 | 2 | 2 | 23 | 2010 |
| 13,9 | 15,1 | 0,6 | 2 | 2 | 23 | 2010 |
| 14,6 | 17,5 | 0,6 | 3 | 2 | 19 | 2012 |
| 14,4 | 16,8 | 0,6 | 3 | 2 | 22 | 2001 |
| 15   | 19   | 0,6 | 3 | 2 | 20 | 2008 |
| 15   | 19   | 0,6 | 5 | 2 | 21 | 2011 |
| 15   | 19   | 0,6 | 4 | 2 | 23 | 2011 |
| 15   | 19   | 0,6 | 3 | 2 | 19 | 2013 |
| 15   | 19   | 0,6 | 3 | 2 | 19 | 2013 |
| 13,8 | 14,8 | 0,6 | 2 | 2 | 18 | 2000 |
| 13,8 | 14,8 | 0,6 | 5 | 2 | 18 | 2007 |
| 13,8 | 14,8 | 0,6 | 3 | 2 | 20 | 2010 |
| 13,8 | 14,8 | 0,6 | 2 | 2 | 23 | 2010 |
| 13,8 | 14,8 | 0,6 | 3 | 2 | 20 | 2010 |
| 13,8 | 14,8 | 0,6 | 2 | 2 | 23 | 2010 |
| 13,8 | 14,8 | 0,6 | 2 | 2 | 19 | 2013 |

|      |      |     |   |   |    |      |
|------|------|-----|---|---|----|------|
| 12,5 | 11   | 0,6 | 2 | 2 | 20 | 2004 |
| 12,5 | 11   | 0,6 | 2 | 2 | 19 | 2013 |
| 16,5 | 25,3 | 0,6 | 5 | 2 | 16 | 2015 |
| 15,7 | 21,8 | 0,6 | 5 | 2 | 19 | 1999 |
| 15,7 | 21,8 | 0,6 | 3 | 2 | 18 | 2001 |
| 16,3 | 24,4 | 0,6 | 3 | 2 | 20 | 2003 |
| 15,1 | 19,4 | 0,6 | 3 | 2 | 17 | 2008 |
| 15,1 | 19,4 | 0,6 | 6 | 2 | 19 | 2008 |
| 15,1 | 19,4 | 0,6 | 9 | 2 | 22 | 2009 |
| 14,7 | 17,9 | 0,6 | 3 | 2 | 21 | 2003 |
| 14,7 | 17,9 | 0,6 | 4 | 2 | 21 | 2009 |
| 14,7 | 17,9 | 0,6 | 5 | 2 | 21 | 2010 |
| 14,7 | 17,9 | 0,6 | 5 | 2 | 21 | 2010 |
| 14,1 | 15,8 | 0,6 | 3 | 2 | 20 | 2008 |
| 14,1 | 15,8 | 0,6 | 3 | 2 | 19 | 2015 |
| 12,9 | 12,1 | 0,6 | 2 | 2 | 21 | 2006 |
| 12,9 | 12,1 | 0,6 | 2 | 2 | 21 | 2008 |
| 15,6 | 21,4 | 0,6 | 4 | 2 | 23 | 2009 |
| 11,9 | 9,5  | 0,6 | 2 | 2 | 20 | 2004 |
| 11,9 | 9,5  | 0,6 | 2 | 2 | 18 | 2007 |
| 11,6 | 8,8  | 0,6 | 2 | 2 | 20 | 2004 |
| 15,2 | 19,8 | 0,6 | 3 | 2 | 21 | 2001 |
| 15,2 | 19,8 | 0,6 | 3 | 2 | 25 | 2003 |
| 15,2 | 19,8 | 0,6 | 4 | 2 | 17 | 2009 |
| 13,7 | 14,5 | 0,6 | 3 | 2 | 15 | 2015 |
| 16   | 23,1 | 0,6 | 6 | 2 | 22 | 2007 |
| 17,1 | 28,2 | 0,6 | 6 | 2 | 17 | 2002 |
| 17,1 | 28,2 | 0,6 | 5 | 2 | 19 | 2010 |

|      |      |     |   |   |    |      |
|------|------|-----|---|---|----|------|
| 17,1 | 28,2 | 0,6 | 5 | 2 | 19 | 2010 |
| 17,1 | 28,2 | 0,6 | 5 | 2 | 20 | 2012 |
| 15,3 | 20,2 | 0,6 | 9 | 2 | 22 | 2007 |
| 15,3 | 20,2 | 0,6 | 4 | 2 | 20 | 2011 |
| 15,3 | 20,2 | 0,6 | 5 | 2 | 19 | 2012 |
| 15,4 | 20,6 | 0,6 | 4 | 2 | 18 | 2015 |
| 14,5 | 17,2 | 0,6 | 3 | 2 | 26 | 2001 |
| 14,5 | 17,2 | 0,6 | 4 | 2 | 22 | 2011 |
| 12,3 | 10,5 | 0,6 | 2 | 2 | 22 | 2005 |
| 14,3 | 16,5 | 0,6 | 3 | 2 | 18 | 2014 |
| 13   | 12,4 | 0,6 | 3 | 2 | 20 | 2011 |
| 13   | 12,4 | 0,6 | 2 | 2 | 19 | 2013 |
| 12,1 | 10   | 0,6 | 2 | 2 | 25 | 2004 |
| 12,1 | 10   | 0,6 | 2 | 2 | 18 | 2007 |
| 12,1 | 10   | 0,6 | 2 | 2 | 20 | 2007 |
| 16,4 | 24,9 | 0,6 | 4 | 2 | 18 | 2001 |
| 14   | 15,5 | 0,6 | 3 | 2 | 18 | 2000 |
| 14   | 15,5 | 0,6 | 3 | 2 | 19 | 2010 |
| 14   | 15,5 | 0,6 | 3 | 2 | 19 | 2010 |
| 14   | 15,5 | 0,6 | 3 | 2 | 20 | 2013 |
| 12,6 | 11,3 | 0,6 | 2 | 2 | 20 | 2010 |
| 12,6 | 11,3 | 0,6 | 2 | 2 | 20 | 2010 |
| 13,1 | 12,7 | 0,6 | 3 | 2 | 18 | 2014 |
| 16,8 | 26,8 | 0,6 | 7 | 2 | 25 | 2004 |
| 13,4 | 13,6 | 0,6 | 3 | 2 | 18 | 2007 |
| 14,9 | 18,7 | 0,6 | 4 | 2 | 21 | 2005 |
| 14,9 | 18,7 | 0,6 | 5 | 2 | 18 | 2007 |
| 13,3 | 13,3 | 0,6 | 2 | 2 | 18 | 2002 |

|      |      |     |   |   |    |      |
|------|------|-----|---|---|----|------|
| 13,3 | 13,3 | 0,6 | 2 | 2 | 19 | 2010 |
| 13,3 | 13,3 | 0,6 | 2 | 2 | 19 | 2010 |
| 15,8 | 22,3 | 0,6 | 3 | 2 | 19 | 2004 |
| 16,5 | 25,4 | 0,6 | 5 | 2 | 19 | 2010 |
| 16,5 | 25,4 | 0,6 | 5 | 2 | 19 | 2010 |
| 16,1 | 23,6 | 0,6 | 7 | 2 | 20 | 2012 |
| 14,6 | 17,6 | 0,6 | 4 | 2 | 23 | 2003 |
| 16,3 | 24,5 | 0,6 | 5 | 2 | 18 | 2001 |
| 16,3 | 24,5 | 0,6 | 6 | 2 | 21 | 2001 |
| 14,2 | 16,2 | 0,6 | 4 | 2 | 23 | 2010 |
| 14,2 | 16,2 | 0,6 | 4 | 2 | 23 | 2010 |
| 15,7 | 21,9 | 0,6 | 4 | 2 | 20 | 2001 |
| 15   | 19,1 | 0,6 | 3 | 2 | 17 | 2002 |
| 15   | 19,1 | 0,6 | 6 | 2 | 25 | 2004 |
| 15   | 19,1 | 0,6 | 3 | 2 | 25 | 2004 |
| 15   | 19,1 | 0,6 | 3 | 2 | 20 | 2007 |
| 15   | 19,1 | 0,6 | 5 | 2 | 22 | 2007 |
| 15   | 19,1 | 0,6 | 2 | 2 | 22 | 2013 |
| 15   | 19,1 | 0,6 | 3 | 2 | 18 | 2014 |
| 13,9 | 15,2 | 0,6 | 3 | 2 | 22 | 2015 |
| 16,6 | 25,9 | 0,6 | 3 | 2 | 20 | 2003 |
| 15,6 | 21,5 | 0,6 | 3 | 2 | 18 | 2001 |
| 15,1 | 19,5 | 0,6 | 3 | 2 | 20 | 2003 |
| 15,1 | 19,5 | 0,6 | 4 | 2 | 21 | 2006 |
| 15,1 | 19,5 | 0,6 | 3 | 2 | 23 | 2010 |
| 15,1 | 19,5 | 0,6 | 3 | 2 | 23 | 2010 |
| 16   | 23,2 | 0,6 | 3 | 2 | 18 | 2001 |
| 16   | 23,2 | 0,6 | 6 | 2 | 20 | 2011 |

|      |      |     |   |   |    |      |
|------|------|-----|---|---|----|------|
| 12,4 | 10,8 | 0,6 | 2 | 2 | 24 | 2009 |
| 14,7 | 18   | 0,6 | 4 | 2 | 19 | 1999 |
| 14,7 | 18   | 0,6 | 3 | 2 | 18 | 2000 |
| 14,7 | 18   | 0,6 | 4 | 2 | 26 | 2006 |
| 14,7 | 18   | 0,6 | 3 | 2 | 18 | 2014 |
| 14,7 | 18   | 0,6 | 5 | 2 | 15 | 2015 |
| 15,2 | 19,9 | 0,6 | 4 | 2 | 18 | 2008 |
| 15,2 | 19,9 | 0,6 | 3 | 2 | 19 | 2014 |
| 17,9 | 32,5 | 0,6 | 3 | 2 | 19 | 2013 |
| 15,4 | 20,7 | 0,6 | 3 | 2 | 18 | 2015 |
| 16,4 | 25   | 0,6 | 5 | 2 | 18 | 2012 |
| 15,3 | 20,3 | 0,6 | 5 | 2 | 15 | 2015 |
| 15,3 | 20,3 | 0,6 | 3 | 2 | 18 | 2015 |
| 13,8 | 14,9 | 0,6 | 2 | 2 | 23 | 2008 |
| 12   | 9,8  | 0,6 | 2 | 2 | 20 | 2004 |
| 12   | 9,8  | 0,6 | 2 | 2 | 22 | 2011 |
| 15,9 | 22,8 | 0,6 | 4 | 2 | 17 | 2009 |
| 12,8 | 11,9 | 0,6 | 2 | 2 | 24 | 2006 |
| 14,5 | 17,3 | 0,6 | 7 | 2 | 26 | 2009 |
| 14,3 | 16,6 | 0,6 | 2 | 2 | 19 | 2000 |
| 14,3 | 16,6 | 0,6 | 5 | 2 | 23 | 2006 |
| 14,3 | 16,6 | 0,6 | 3 | 2 | 16 | 2015 |
| 15,8 | 22,4 | 0,6 | 5 | 2 | 20 | 2001 |
| 15,8 | 22,4 | 0,6 | 3 | 2 | 17 | 2014 |
| 16,3 | 24,6 | 0,6 | 3 | 2 | 20 | 2003 |
| 12,9 | 12,2 | 0,6 | 2 | 2 | 22 | 2007 |
| 12,5 | 11,1 | 0,6 | 2 | 2 | 26 | 2006 |
| 12,5 | 11,1 | 0,6 | 2 | 2 | 20 | 2009 |

|      |      |     |   |   |    |      |
|------|------|-----|---|---|----|------|
| 18,1 | 33,7 | 0,6 | 4 | 2 | 18 | 2014 |
| 14,9 | 18,8 | 0,6 | 4 | 2 | 26 | 2006 |
| 14,9 | 18,8 | 0,6 | 3 | 2 | 19 | 2014 |
| 13,6 | 14,3 | 0,6 | 2 | 2 | 18 | 2014 |
| 13,6 | 14,3 | 0,6 | 3 | 2 | 23 | 2015 |
| 14   | 15,6 | 0,6 | 2 | 2 | 18 | 2002 |
| 14   | 15,6 | 0,6 | 4 | 2 | 20 | 2006 |
| 14   | 15,6 | 0,6 | 3 | 2 | 20 | 2008 |
| 14   | 15,6 | 0,6 | 4 | 2 | 22 | 2009 |
| 14   | 15,6 | 0,6 | 3 | 2 | 19 | 2013 |
| 14   | 15,6 | 0,6 | 3 | 2 | 19 | 2014 |
| 18,5 | 36   | 0,6 | 6 | 2 | 20 | 2010 |
| 18,5 | 36   | 0,6 | 6 | 2 | 20 | 2010 |
| 18,5 | 36   | 0,6 | 5 | 2 | 18 | 2014 |
| 14,6 | 17,7 | 0,6 | 3 | 2 | 20 | 2010 |
| 14,6 | 17,7 | 0,6 | 3 | 2 | 20 | 2010 |
| 14,6 | 17,7 | 0,6 | 4 | 2 | 19 | 2014 |
| 16   | 23,3 | 0,6 | 5 | 2 | 25 | 2002 |
| 16   | 23,3 | 0,6 | 8 | 2 | 20 | 2010 |
| 16   | 23,3 | 0,6 | 8 | 2 | 20 | 2010 |
| 18,7 | 37,2 | 0,6 | 4 | 2 | 15 | 2015 |
| 15   | 19,2 | 0,6 | 3 | 2 | 20 | 2007 |
| 13   | 12,5 | 0,6 | 2 | 2 | 20 | 2008 |
| 13   | 12,5 | 0,6 | 2 | 2 | 23 | 2010 |
| 13   | 12,5 | 0,6 | 2 | 2 | 23 | 2010 |
| 13   | 12,5 | 0,6 | 2 | 2 | 19 | 2013 |
| 13   | 12,5 | 0,6 | 2 | 2 | 19 | 2013 |
| 13   | 12,5 | 0,6 | 2 | 2 | 19 | 2014 |

|      |      |     |   |   |    |      |
|------|------|-----|---|---|----|------|
| 13,5 | 14   | 0,6 | 2 | 2 | 21 | 2000 |
| 13,5 | 14   | 0,6 | 3 | 2 | 23 | 2008 |
| 16,2 | 24,2 | 0,6 | 3 | 2 | 19 | 2010 |
| 16,2 | 24,2 | 0,6 | 3 | 2 | 19 | 2010 |
| 14,2 | 16,3 | 0,6 | 2 | 2 | 20 | 2001 |
| 14,2 | 16,3 | 0,6 | 2 | 2 | 23 | 2006 |
| 14,2 | 16,3 | 0,6 | 3 | 2 | 23 | 2008 |
| 14,2 | 16,3 | 0,6 | 4 | 2 | 20 | 2011 |
| 14,4 | 17   | 0,6 | 3 | 2 | 21 | 1999 |
| 14,4 | 17   | 0,6 | 3 | 2 | 19 | 2001 |
| 14,4 | 17   | 0,6 | 4 | 2 | 22 | 2003 |
| 14,4 | 17   | 0,6 | 4 | 2 | 20 | 2011 |
| 13,1 | 12,8 | 0,6 | 3 | 2 | 22 | 2005 |
| 13,1 | 12,8 | 0,6 | 2 | 2 | 19 | 2013 |
| 13,4 | 13,7 | 0,6 | 2 | 2 | 19 | 2002 |
| 13,4 | 13,7 | 0,6 | 2 | 2 | 21 | 2003 |
| 13,4 | 13,7 | 0,6 | 2 | 2 | 18 | 2014 |
| 11,2 | 8    | 0,6 | 2 | 2 | 19 | 2004 |
| 15,2 | 20   | 0,6 | 5 | 2 | 21 | 2010 |
| 15,2 | 20   | 0,6 | 5 | 2 | 21 | 2010 |
| 15,4 | 20,8 | 0,6 | 3 | 2 | 21 | 2003 |
| 13,2 | 13,1 | 0,6 | 2 | 2 | 20 | 2001 |
| 13,2 | 13,1 | 0,6 | 2 | 2 | 17 | 2002 |
| 15,3 | 20,4 | 0,6 | 3 | 2 | 23 | 2003 |
| 15,3 | 20,4 | 0,6 | 4 | 2 | 25 | 2003 |
| 15,3 | 20,4 | 0,6 | 3 | 2 | 26 | 2003 |
| 15,3 | 20,4 | 0,6 | 4 | 2 | 23 | 2006 |
| 12,3 | 10,6 | 0,6 | 2 | 2 | 18 | 2007 |

|      |      |     |   |   |    |      |
|------|------|-----|---|---|----|------|
| 13,9 | 15,3 | 0,6 | 4 | 2 | 19 | 2009 |
| 13,9 | 15,3 | 0,6 | 2 | 2 | 20 | 2012 |
| 14,7 | 18,1 | 0,6 | 3 | 2 | 19 | 2002 |
| 14,7 | 18,1 | 0,6 | 3 | 2 | 21 | 2015 |
| 17   | 28   | 0,6 | 5 | 2 | 17 | 2014 |
| 12,1 | 10,1 | 0,6 | 2 | 2 | 19 | 2006 |
| 12,1 | 10,1 | 0,6 | 2 | 2 | 18 | 2007 |
| 16,1 | 23,8 | 0,6 | 5 | 2 | 20 | 2007 |
| 16,1 | 23,8 | 0,6 | 5 | 2 | 20 | 2012 |
| 15,8 | 22,5 | 0,6 | 3 | 2 | 22 | 2003 |
| 14,5 | 17,4 | 0,6 | 3 | 2 | 25 | 2004 |
| 14,5 | 17,4 | 0,6 | 4 | 2 | 26 | 2009 |
| 13,8 | 15   | 0,6 | 4 | 2 | 23 | 1999 |
| 13,8 | 15   | 0,6 | 3 | 2 | 18 | 2008 |
| 13,8 | 15   | 0,6 | 3 | 2 | 22 | 2011 |
| 13,8 | 15   | 0,6 | 2 | 2 | 21 | 2013 |
| 14,1 | 16   | 0,6 | 4 | 2 | 23 | 2009 |
| 15,7 | 22,1 | 0,6 | 5 | 2 | 21 | 2010 |
| 15,7 | 22,1 | 0,6 | 5 | 2 | 21 | 2010 |
| 14,3 | 16,7 | 0,6 | 3 | 2 | 19 | 2000 |
| 14,3 | 16,7 | 0,6 | 3 | 2 | 23 | 2010 |
| 14,3 | 16,7 | 0,6 | 3 | 2 | 23 | 2010 |
| 14,3 | 16,7 | 0,6 | 4 | 2 | 20 | 2011 |
| 14,3 | 16,7 | 0,6 | 4 | 2 | 17 | 2012 |
| 14,3 | 16,7 | 0,6 | 4 | 2 | 16 | 2015 |
| 12,7 | 11,7 | 0,6 | 2 | 2 | 18 | 2002 |
| 12,7 | 11,7 | 0,6 | 2 | 2 | 22 | 2005 |
| 16   | 23,4 | 0,6 | 4 | 2 | 25 | 2004 |

|      |      |     |   |   |    |      |
|------|------|-----|---|---|----|------|
| 16   | 23,4 | 0,6 | 5 | 2 | 19 | 2006 |
| 16   | 23,4 | 0,6 | 9 | 2 | 21 | 2011 |
| 16,4 | 25,2 | 0,6 | 5 | 2 | 19 | 2002 |
| 14,9 | 18,9 | 0,6 | 3 | 2 | 20 | 2006 |
| 14,9 | 18,9 | 0,6 | 4 | 2 | 26 | 2006 |
| 16,8 | 27,1 | 0,6 | 6 | 2 | 19 | 2004 |
| 13,7 | 14,7 | 0,6 | 4 | 2 | 25 | 2004 |
| 13,7 | 14,7 | 0,6 | 2 | 2 | 19 | 2010 |
| 13,7 | 14,7 | 0,6 | 2 | 2 | 19 | 2010 |
| 13,7 | 14,7 | 0,6 | 3 | 2 | 19 | 2014 |
| 13,7 | 14,7 | 0,6 | 2 | 2 | 19 | 2015 |
| 12,4 | 10,9 | 0,6 | 2 | 2 | 22 | 2005 |
| 15   | 19,3 | 0,6 | 4 | 2 | 23 | 2011 |
| 15   | 19,3 | 0,6 | 3 | 2 | 19 | 2014 |
| 15   | 19,3 | 0,6 | 5 | 2 | 21 | 2014 |
| 15   | 19,3 | 0,6 | 3 | 2 | 15 | 2015 |
| 14,6 | 17,8 | 0,6 | 3 | 2 | 19 | 2001 |
| 14,6 | 17,8 | 0,6 | 2 | 2 | 21 | 2001 |
| 14,6 | 17,8 | 0,6 | 4 | 2 | 21 | 2005 |
| 14   | 15,7 | 0,6 | 2 | 2 | 23 | 2006 |
| 14   | 15,7 | 0,6 | 3 | 2 | 16 | 2008 |
| 14   | 15,7 | 0,6 | 8 | 2 | 23 | 2010 |
| 14   | 15,7 | 0,6 | 8 | 2 | 23 | 2010 |
| 14   | 15,7 | 0,6 | 3 | 2 | 17 | 2014 |
| 15,1 | 19,7 | 0,6 | 3 | 2 | 21 | 2001 |
| 15,9 | 23   | 0,6 | 3 | 2 | 21 | 2001 |
| 15,9 | 23   | 0,6 | 3 | 2 | 19 | 2004 |
| 15,9 | 23   | 0,6 | 9 | 2 | 19 | 2014 |

|      |      |     |   |   |    |      |
|------|------|-----|---|---|----|------|
| 12,8 | 12   | 0,6 | 4 | 2 | 26 | 2006 |
| 15,4 | 20,9 | 0,6 | 3 | 2 | 19 | 2004 |
| 15,4 | 20,9 | 0,6 | 6 | 2 | 22 | 2011 |
| 13,6 | 14,4 | 0,6 | 2 | 2 | 26 | 2006 |
| 13,6 | 14,4 | 0,6 | 2 | 2 | 26 | 2006 |
| 13,6 | 14,4 | 0,6 | 2 | 2 | 22 | 2011 |
| 13,6 | 14,4 | 0,6 | 2 | 2 | 19 | 2013 |
| 13,6 | 14,4 | 0,6 | 3 | 2 | 19 | 2015 |
| 14,4 | 17,1 | 0,6 | 2 | 2 | 21 | 2003 |
| 14,4 | 17,1 | 0,6 | 4 | 2 | 22 | 2011 |
| 12,2 | 10,4 | 0,6 | 2 | 2 | 22 | 2013 |
| 14,2 | 16,4 | 0,6 | 3 | 2 | 19 | 2001 |
| 14,2 | 16,4 | 0,6 | 2 | 2 | 19 | 2014 |
| 12,9 | 12,3 | 0,6 | 2 | 2 | 19 | 2002 |
| 13,5 | 14,1 | 0,6 | 2 | 2 | 19 | 2014 |
| 13,9 | 15,4 | 0,6 | 5 | 2 | 23 | 2007 |
| 13   | 12,6 | 0,6 | 2 | 2 | 19 | 2002 |
| 13   | 12,6 | 0,6 | 3 | 2 | 23 | 2010 |
| 13   | 12,6 | 0,6 | 3 | 2 | 23 | 2010 |
| 13,4 | 13,8 | 0,6 | 2 | 2 | 18 | 2014 |
| 16,8 | 27,2 | 0,6 | 6 | 2 | 22 | 2005 |
| 15,7 | 22,2 | 0,6 | 4 | 2 | 19 | 1999 |
| 15,7 | 22,2 | 0,6 | 3 | 2 | 19 | 2010 |
| 15,7 | 22,2 | 0,6 | 3 | 2 | 19 | 2010 |
| 16   | 23,5 | 0,6 | 3 | 2 | 19 | 2012 |
| 14,8 | 18,6 | 0,6 | 3 | 2 | 21 | 2000 |
| 14,8 | 18,6 | 0,6 | 4 | 2 | 17 | 2009 |
| 14,8 | 18,6 | 0,6 | 5 | 2 | 23 | 2010 |

|      |      |     |    |   |    |      |
|------|------|-----|----|---|----|------|
| 14,8 | 18,6 | 0,6 | 5  | 2 | 23 | 2010 |
| 14,8 | 18,6 | 0,6 | 3  | 2 | 15 | 2015 |
| 13,1 | 12,9 | 0,6 | 2  | 2 | 19 | 2002 |
| 13,1 | 12,9 | 0,6 | 2  | 2 | 19 | 2013 |
| 13,1 | 12,9 | 0,6 | 2  | 2 | 21 | 2014 |
| 13,1 | 12,9 | 0,6 | 2  | 2 | 23 | 2014 |
| 16,2 | 24,4 | 0,6 | 4  | 2 | 17 | 2009 |
| 13,2 | 13,2 | 0,6 | 2  | 2 | 18 | 2002 |
| 13,2 | 13,2 | 0,6 | 2  | 2 | 23 | 2010 |
| 13,2 | 13,2 | 0,6 | 2  | 2 | 23 | 2010 |
| 17,1 | 28,7 | 0,6 | 6  | 2 | 20 | 2013 |
| 14,5 | 17,5 | 0,6 | 3  | 2 | 19 | 2010 |
| 14,5 | 17,5 | 0,6 | 3  | 2 | 19 | 2010 |
| 21,2 | 54,7 | 0,6 | 10 | 2 | 16 | 2015 |
| 16,5 | 25,8 | 0,6 | 5  | 2 | 21 | 2000 |
| 14,9 | 19   | 0,6 | 4  | 2 | 20 | 2004 |
| 14,9 | 19   | 0,6 | 4  | 2 | 17 | 2009 |
| 11,7 | 9,2  | 0,6 | 2  | 2 | 22 | 2007 |
| 14,3 | 16,8 | 0,6 | 3  | 2 | 18 | 2000 |
| 14,3 | 16,8 | 0,6 | 3  | 2 | 17 | 2014 |
| 13,8 | 15,1 | 0,6 | 2  | 2 | 19 | 2000 |
| 13,8 | 15,1 | 0,6 | 2  | 2 | 18 | 2001 |
| 13,8 | 15,1 | 0,6 | 2  | 2 | 19 | 2010 |
| 13,8 | 15,1 | 0,6 | 2  | 2 | 19 | 2010 |
| 15,5 | 21,4 | 0,6 | 5  | 2 | 19 | 2010 |
| 15,5 | 21,4 | 0,6 | 5  | 2 | 19 | 2010 |
| 18,4 | 35,8 | 0,6 | 4  | 2 | 21 | 2012 |
| 15   | 19,4 | 0,6 | 8  | 2 | 20 | 2010 |

|      |      |     |   |   |    |      |
|------|------|-----|---|---|----|------|
| 15   | 19,4 | 0,6 | 5 | 2 | 21 | 2010 |
| 15   | 19,4 | 0,6 | 8 | 2 | 20 | 2010 |
| 15   | 19,4 | 0,6 | 5 | 2 | 21 | 2010 |
| 15   | 19,4 | 0,6 | 6 | 2 | 23 | 2011 |
| 18,5 | 36,4 | 0,6 | 6 | 2 | 19 | 2013 |
| 16,3 | 24,9 | 0,6 | 5 | 2 | 19 | 2010 |
| 16,3 | 24,9 | 0,6 | 5 | 2 | 19 | 2010 |
| 15,4 | 21   | 0,6 | 6 | 2 | 17 | 2009 |
| 15,1 | 19,8 | 0,6 | 4 | 2 | 21 | 2009 |
| 15,1 | 19,8 | 0,6 | 6 | 2 | 22 | 2011 |
| 15,1 | 19,8 | 0,6 | 5 | 2 | 21 | 2014 |
| 15,3 | 20,6 | 0,6 | 3 | 2 | 26 | 2003 |
| 15,3 | 20,6 | 0,6 | 6 | 2 | 20 | 2010 |
| 15,3 | 20,6 | 0,6 | 6 | 2 | 20 | 2010 |
| 15,3 | 20,6 | 0,6 | 3 | 2 | 16 | 2015 |
| 14,6 | 17,9 | 0,6 | 4 | 2 | 19 | 1999 |
| 14,6 | 17,9 | 0,6 | 2 | 2 | 21 | 2003 |
| 15,2 | 20,2 | 0,6 | 5 | 2 | 21 | 2000 |
| 15,2 | 20,2 | 0,6 | 4 | 2 | 23 | 2009 |
| 15,2 | 20,2 | 0,6 | 3 | 2 | 19 | 2015 |
| 11,3 | 8,3  | 0,6 | 2 | 2 | 20 | 2004 |
| 15,8 | 22,7 | 0,6 | 5 | 2 | 20 | 2006 |
| 15,8 | 22,7 | 0,6 | 3 | 2 | 19 | 2013 |
| 13,7 | 14,8 | 0,6 | 4 | 2 | 25 | 2004 |
| 16,8 | 27,3 | 0,6 | 7 | 2 | 23 | 2001 |
| 14   | 15,8 | 0,6 | 3 | 2 | 18 | 2000 |
| 14   | 15,8 | 0,6 | 2 | 2 | 18 | 2015 |
| 17,2 | 29,3 | 0,6 | 6 | 2 | 18 | 2014 |

|      |      |     |   |   |    |      |
|------|------|-----|---|---|----|------|
| 16,4 | 25,4 | 0,6 | 4 | 2 | 15 | 2015 |
| 19,8 | 44,7 | 0,6 | 6 | 2 | 17 | 2014 |
| 16,9 | 27,8 | 0,6 | 6 | 2 | 18 | 2001 |
| 17,6 | 31,4 | 0,6 | 6 | 2 | 23 | 2015 |
| 17   | 28,3 | 0,6 | 7 | 2 | 23 | 2001 |
| 14,4 | 17,2 | 0,6 | 5 | 2 | 22 | 2009 |
| 12,7 | 11,8 | 0,6 | 2 | 2 | 20 | 2003 |
| 12,7 | 11,8 | 0,6 | 2 | 2 | 22 | 2009 |
| 14,7 | 18,3 | 0,6 | 3 | 2 | 25 | 2003 |
| 14,7 | 18,3 | 0,6 | 3 | 2 | 22 | 2009 |
| 14,7 | 18,3 | 0,6 | 7 | 2 | 26 | 2009 |
| 14,7 | 18,3 | 0,6 | 5 | 2 | 23 | 2010 |
| 14,7 | 18,3 | 0,6 | 5 | 2 | 23 | 2010 |
| 14,7 | 18,3 | 0,6 | 3 | 2 | 18 | 2015 |
| 16   | 23,6 | 0,6 | 4 | 2 | 18 | 2015 |
| 15,7 | 22,3 | 0,6 | 6 | 2 | 19 | 2000 |
| 14,2 | 16,5 | 0,6 | 3 | 2 | 25 | 2004 |
| 14,2 | 16,5 | 0,6 | 3 | 2 | 18 | 2007 |
| 14,2 | 16,5 | 0,6 | 5 | 2 | 23 | 2010 |
| 14,2 | 16,5 | 0,6 | 5 | 2 | 23 | 2010 |
| 16,2 | 24,5 | 0,6 | 3 | 2 | 19 | 2010 |
| 16,2 | 24,5 | 0,6 | 3 | 2 | 19 | 2010 |
| 18,4 | 35,9 | 0,6 | 4 | 2 | 15 | 2015 |
| 13,6 | 14,5 | 0,6 | 2 | 2 | 23 | 2009 |
| 11,6 | 9    | 0,6 | 2 | 2 | 18 | 2007 |
| 21   | 53,4 | 0,6 | 9 | 2 | 17 | 2014 |
| 14,8 | 18,7 | 0,6 | 3 | 2 | 22 | 2000 |
| 14,8 | 18,7 | 0,6 | 4 | 2 | 25 | 2004 |

|      |      |     |    |   |    |      |
|------|------|-----|----|---|----|------|
| 14,8 | 18,7 | 0,6 | 4  | 2 | 23 | 2008 |
| 14,8 | 18,7 | 0,6 | 4  | 2 | 20 | 2009 |
| 14,8 | 18,7 | 0,6 | 3  | 2 | 20 | 2013 |
| 14,8 | 18,7 | 0,6 | 3  | 2 | 17 | 2014 |
| 15,6 | 21,9 | 0,6 | 5  | 2 | 19 | 1999 |
| 15,6 | 21,9 | 0,6 | 3  | 2 | 21 | 2000 |
| 12,4 | 11   | 0,6 | 2  | 2 | 26 | 2006 |
| 12,4 | 11   | 0,6 | 2  | 2 | 26 | 2006 |
| 12,8 | 12,1 | 0,6 | 2  | 2 | 23 | 2009 |
| 12,8 | 12,1 | 0,6 | 2  | 2 | 20 | 2010 |
| 12,8 | 12,1 | 0,6 | 2  | 2 | 20 | 2010 |
| 12,8 | 12,1 | 0,6 | 2  | 2 | 18 | 2014 |
| 17,4 | 30,4 | 0,6 | 8  | 2 | 23 | 2001 |
| 13,5 | 14,2 | 0,6 | 2  | 2 | 20 | 2000 |
| 13,5 | 14,2 | 0,6 | 4  | 2 | 23 | 2008 |
| 13,5 | 14,2 | 0,6 | 2  | 2 | 21 | 2010 |
| 13,5 | 14,2 | 0,6 | 2  | 2 | 21 | 2010 |
| 13,5 | 14,2 | 0,6 | 2  | 2 | 18 | 2014 |
| 13,9 | 15,5 | 0,6 | 3  | 2 | 25 | 2002 |
| 13,9 | 15,5 | 0,6 | 3  | 2 | 25 | 2007 |
| 13,9 | 15,5 | 0,6 | 3  | 2 | 18 | 2015 |
| 15,9 | 23,2 | 0,6 | 6  | 2 | 19 | 2008 |
| 16,3 | 25   | 0,6 | 10 | 2 | 23 | 2010 |
| 16,3 | 25   | 0,6 | 10 | 2 | 23 | 2010 |
| 16,3 | 25   | 0,6 | 3  | 2 | 18 | 2015 |
| 16,3 | 25   | 0,6 | 8  | 2 | 23 | 2015 |
| 14,5 | 17,6 | 0,6 | 3  | 2 | 18 | 2000 |
| 15,5 | 21,5 | 0,6 | 7  | 2 | 20 | 2009 |

|      |      |     |   |   |    |      |
|------|------|-----|---|---|----|------|
| 15,5 | 21,5 | 0,6 | 3 | 2 | 17 | 2014 |
| 14,9 | 19,1 | 0,6 | 4 | 2 | 19 | 2012 |
| 13,4 | 13,9 | 0,6 | 2 | 2 | 18 | 1999 |
| 15   | 19,5 | 0,6 | 4 | 2 | 21 | 2009 |
| 15   | 19,5 | 0,6 | 4 | 2 | 15 | 2015 |
| 15   | 19,5 | 0,6 | 4 | 2 | 16 | 2015 |
| 10,4 | 6,5  | 0,6 | 2 | 2 | 23 | 2004 |
| 16,8 | 27,4 | 0,6 | 6 | 2 | 21 | 2011 |
| 14,1 | 16,2 | 0,6 | 2 | 2 | 20 | 2001 |
| 14,1 | 16,2 | 0,6 | 3 | 2 | 20 | 2008 |
| 14,1 | 16,2 | 0,6 | 2 | 2 | 20 | 2010 |
| 14,1 | 16,2 | 0,6 | 3 | 2 | 21 | 2010 |
| 14,1 | 16,2 | 0,6 | 2 | 2 | 20 | 2010 |
| 14,1 | 16,2 | 0,6 | 3 | 2 | 21 | 2010 |
| 14,1 | 16,2 | 0,6 | 3 | 2 | 21 | 2015 |
| 14,3 | 16,9 | 0,6 | 2 | 2 | 18 | 1999 |
| 14,3 | 16,9 | 0,6 | 4 | 2 | 18 | 2000 |
| 14,3 | 16,9 | 0,6 | 4 | 2 | 22 | 2005 |
| 14,3 | 16,9 | 0,6 | 6 | 2 | 23 | 2006 |
| 14,3 | 16,9 | 0,6 | 3 | 2 | 19 | 2008 |
| 14,3 | 16,9 | 0,6 | 3 | 2 | 21 | 2008 |
| 14,3 | 16,9 | 0,6 | 4 | 2 | 23 | 2011 |
| 14,3 | 16,9 | 0,6 | 3 | 2 | 19 | 2013 |
| 15,3 | 20,7 | 0,6 | 4 | 2 | 19 | 1999 |
| 15,3 | 20,7 | 0,6 | 4 | 2 | 19 | 2004 |
| 15,3 | 20,7 | 0,6 | 4 | 2 | 18 | 2015 |
| 15,1 | 19,9 | 0,6 | 6 | 2 | 23 | 2006 |
| 15,1 | 19,9 | 0,6 | 4 | 2 | 19 | 2013 |

|      |      |     |   |   |    |      |
|------|------|-----|---|---|----|------|
| 15,8 | 22,8 | 0,6 | 5 | 2 | 25 | 2004 |
| 15,8 | 22,8 | 0,6 | 6 | 2 | 25 | 2004 |
| 15,2 | 20,3 | 0,6 | 3 | 2 | 22 | 2001 |
| 17   | 28,4 | 0,6 | 6 | 2 | 20 | 2013 |
| 17   | 28,4 | 0,6 | 6 | 2 | 21 | 2014 |
| 17   | 28,4 | 0,6 | 5 | 2 | 21 | 2015 |
| 13   | 12,7 | 0,6 | 2 | 2 | 18 | 2014 |
| 13,3 | 13,6 | 0,6 | 2 | 2 | 20 | 2002 |
| 13,3 | 13,6 | 0,6 | 3 | 2 | 23 | 2011 |
| 13,3 | 13,6 | 0,6 | 2 | 2 | 20 | 2013 |
| 13,3 | 13,6 | 0,6 | 3 | 2 | 21 | 2014 |
| 16,4 | 25,5 | 0,6 | 6 | 2 | 22 | 2004 |
| 16,4 | 25,5 | 0,6 | 5 | 2 | 22 | 2005 |
| 13,1 | 13   | 0,6 | 3 | 2 | 20 | 2007 |
| 13,1 | 13   | 0,6 | 2 | 2 | 21 | 2009 |
| 13,1 | 13   | 0,6 | 3 | 2 | 21 | 2011 |
| 13,2 | 13,3 | 0,6 | 2 | 2 | 19 | 2014 |
| 13,8 | 15,2 | 0,6 | 2 | 2 | 20 | 2001 |
| 13,8 | 15,2 | 0,6 | 3 | 2 | 23 | 2008 |
| 14,6 | 18   | 0,6 | 2 | 2 | 24 | 2001 |
| 14,6 | 18   | 0,6 | 2 | 2 | 20 | 2003 |
| 14,6 | 18   | 0,6 | 3 | 2 | 26 | 2003 |
| 14,6 | 18   | 0,6 | 3 | 2 | 19 | 2013 |
| 14,6 | 18   | 0,6 | 3 | 2 | 18 | 2014 |
| 12,5 | 11,3 | 0,6 | 2 | 2 | 26 | 2006 |
| 16   | 23,7 | 0,6 | 5 | 2 | 19 | 2002 |
| 11,5 | 8,8  | 0,6 | 2 | 2 | 20 | 2004 |
| 11,5 | 8,8  | 0,6 | 2 | 2 | 20 | 2004 |

|      |      |     |    |   |    |      |
|------|------|-----|----|---|----|------|
| 15,7 | 22,4 | 0,6 | 3  | 2 | 21 | 2003 |
| 15,7 | 22,4 | 0,6 | 3  | 2 | 16 | 2015 |
| 17,4 | 30,5 | 0,6 | 7  | 2 | 23 | 2015 |
| 14,7 | 18,4 | 0,6 | 3  | 2 | 23 | 2010 |
| 14,7 | 18,4 | 0,6 | 3  | 2 | 23 | 2010 |
| 14,7 | 18,4 | 0,6 | 4  | 2 | 15 | 2015 |
| 14,4 | 17,3 | 0,6 | 3  | 2 | 18 | 2008 |
| 14   | 15,9 | 0,6 | 4  | 2 | 22 | 2007 |
| 13,7 | 14,9 | 0,6 | 3  | 2 | 20 | 2008 |
| 13,7 | 14,9 | 0,6 | 3  | 2 | 23 | 2015 |
| 15,9 | 23,3 | 0,6 | 4  | 2 | 20 | 2001 |
| 16,7 | 27   | 0,6 | 4  | 2 | 18 | 2015 |
| 14,2 | 16,6 | 0,6 | 4  | 2 | 25 | 2008 |
| 14,2 | 16,6 | 0,6 | 5  | 2 | 20 | 2010 |
| 14,2 | 16,6 | 0,6 | 5  | 2 | 20 | 2010 |
| 12,6 | 11,6 | 0,6 | 2  | 2 | 23 | 2005 |
| 14,8 | 18,8 | 0,6 | 2  | 2 | 23 | 2003 |
| 14,8 | 18,8 | 0,6 | 4  | 2 | 23 | 2006 |
| 14,8 | 18,8 | 0,6 | 5  | 2 | 17 | 2009 |
| 14,8 | 18,8 | 0,6 | 3  | 2 | 19 | 2015 |
| 17,1 | 29   | 0,6 | 10 | 2 | 17 | 2009 |
| 15,5 | 21,6 | 0,6 | 4  | 2 | 21 | 2003 |
| 15,5 | 21,6 | 0,6 | 4  | 2 | 19 | 2011 |
| 17   | 28,5 | 0,6 | 7  | 2 | 19 | 2014 |
| 12,3 | 10,8 | 0,6 | 2  | 2 | 21 | 2006 |
| 16,4 | 25,6 | 0,6 | 3  | 2 | 18 | 2001 |
| 22   | 61,8 | 0,6 | 10 | 2 | 16 | 2015 |
| 14,9 | 19,2 | 0,6 | 4  | 2 | 21 | 2008 |

|      |      |     |   |   |    |      |
|------|------|-----|---|---|----|------|
| 18,2 | 35   | 0,6 | 5 | 2 | 18 | 2015 |
| 14,5 | 17,7 | 0,6 | 3 | 2 | 24 | 2001 |
| 14,5 | 17,7 | 0,6 | 2 | 2 | 22 | 2003 |
| 14,5 | 17,7 | 0,6 | 5 | 2 | 23 | 2007 |
| 11,7 | 9,3  | 0,6 | 1 | 2 | 26 | 2001 |
| 11,7 | 9,3  | 0,6 | 2 | 2 | 23 | 2004 |
| 11,7 | 9,3  | 0,6 | 2 | 2 | 20 | 2007 |
| 15,3 | 20,8 | 0,6 | 3 | 2 | 22 | 2003 |
| 15,1 | 20   | 0,6 | 4 | 2 | 25 | 2004 |
| 15,1 | 20   | 0,6 | 3 | 2 | 19 | 2012 |
| 15,2 | 20,4 | 0,6 | 3 | 2 | 20 | 2003 |
| 12,7 | 11,9 | 0,6 | 2 | 2 | 20 | 2002 |
| 12,7 | 11,9 | 0,6 | 2 | 2 | 19 | 2013 |
| 12,7 | 11,9 | 0,6 | 2 | 2 | 20 | 2013 |
| 16,2 | 24,7 | 0,6 | 3 | 2 | 22 | 2003 |
| 16,2 | 24,7 | 0,6 | 5 | 2 | 19 | 2010 |
| 16,2 | 24,7 | 0,6 | 5 | 2 | 19 | 2010 |
| 16,5 | 26,1 | 0,6 | 3 | 2 | 18 | 2000 |
| 13,5 | 14,3 | 0,6 | 3 | 2 | 23 | 2010 |
| 13,5 | 14,3 | 0,6 | 3 | 2 | 23 | 2010 |
| 14,3 | 17   | 0,6 | 2 | 2 | 20 | 2001 |
| 14,3 | 17   | 0,6 | 4 | 2 | 23 | 2008 |
| 14,3 | 17   | 0,6 | 7 | 2 | 19 | 2009 |
| 14,3 | 17   | 0,6 | 5 | 2 | 23 | 2010 |
| 14,3 | 17   | 0,6 | 5 | 2 | 23 | 2010 |
| 12,1 | 10,3 | 0,6 | 2 | 2 | 20 | 2013 |
| 14,1 | 16,3 | 0,6 | 3 | 2 | 21 | 2000 |
| 14,1 | 16,3 | 0,6 | 3 | 2 | 20 | 2008 |

|      |      |     |   |   |    |      |
|------|------|-----|---|---|----|------|
| 14,1 | 16,3 | 0,6 | 4 | 2 | 19 | 2009 |
| 14,1 | 16,3 | 0,6 | 2 | 2 | 22 | 2009 |
| 14,1 | 16,3 | 0,6 | 3 | 2 | 18 | 2015 |
| 14,6 | 18,1 | 0,6 | 3 | 2 | 18 | 2000 |
| 12,8 | 12,2 | 0,6 | 2 | 2 | 26 | 2006 |
| 13,4 | 14   | 0,6 | 2 | 2 | 22 | 2009 |
| 16,7 | 27,1 | 0,6 | 5 | 2 | 22 | 2007 |
| 17,1 | 29,1 | 0,6 | 7 | 2 | 19 | 2014 |
| 15,6 | 22,1 | 0,6 | 4 | 2 | 22 | 2011 |
| 15,6 | 22,1 | 0,6 | 3 | 2 | 16 | 2015 |
| 17   | 28,6 | 0,6 | 7 | 2 | 17 | 2014 |
| 11,3 | 8,4  | 0,6 | 2 | 2 | 18 | 2007 |
| 16,9 | 28,1 | 0,6 | 7 | 2 | 17 | 2014 |
| 13,8 | 15,3 | 0,6 | 2 | 2 | 17 | 2002 |
| 13,8 | 15,3 | 0,6 | 2 | 2 | 22 | 2003 |
| 13,8 | 15,3 | 0,6 | 3 | 2 | 18 | 2015 |
| 16,1 | 24,3 | 0,6 | 6 | 2 | 17 | 2008 |
| 12,9 | 12,5 | 0,6 | 3 | 2 | 21 | 2005 |
| 12,9 | 12,5 | 0,6 | 2 | 2 | 22 | 2013 |
| 13,3 | 13,7 | 0,6 | 3 | 2 | 19 | 2008 |
| 13,3 | 13,7 | 0,6 | 2 | 2 | 21 | 2008 |
| 13,3 | 13,7 | 0,6 | 2 | 2 | 26 | 2009 |
| 13,3 | 13,7 | 0,6 | 3 | 2 | 15 | 2015 |
| 14,7 | 18,5 | 0,6 | 2 | 2 | 22 | 2003 |
| 13   | 12,8 | 0,6 | 2 | 2 | 25 | 2003 |
| 13   | 12,8 | 0,6 | 3 | 2 | 23 | 2005 |
| 13   | 12,8 | 0,6 | 3 | 2 | 20 | 2007 |
| 13   | 12,8 | 0,6 | 5 | 2 | 20 | 2007 |

|      |      |     |   |   |    |      |
|------|------|-----|---|---|----|------|
| 19,5 | 43,2 | 0,6 | 5 | 2 | 21 | 2010 |
| 19,5 | 43,2 | 0,6 | 5 | 2 | 21 | 2010 |
| 13,2 | 13,4 | 0,6 | 2 | 2 | 21 | 2001 |
| 13,2 | 13,4 | 0,6 | 3 | 2 | 19 | 2007 |
| 13,2 | 13,4 | 0,6 | 3 | 2 | 19 | 2010 |
| 13,2 | 13,4 | 0,6 | 3 | 2 | 19 | 2010 |
| 13,2 | 13,4 | 0,6 | 2 | 2 | 19 | 2013 |
| 16,4 | 25,7 | 0,6 | 6 | 2 | 22 | 2001 |
| 16,4 | 25,7 | 0,6 | 3 | 2 | 20 | 2003 |
| 16,4 | 25,7 | 0,6 | 5 | 2 | 19 | 2010 |
| 16,4 | 25,7 | 0,6 | 5 | 2 | 19 | 2010 |
| 13,1 | 13,1 | 0,6 | 2 | 2 | 19 | 2013 |
| 13,1 | 13,1 | 0,6 | 2 | 2 | 19 | 2013 |
| 14,4 | 17,4 | 0,6 | 3 | 2 | 19 | 2002 |
| 14,4 | 17,4 | 0,6 | 2 | 2 | 22 | 2003 |
| 14,4 | 17,4 | 0,6 | 4 | 2 | 15 | 2015 |
| 14,4 | 17,4 | 0,6 | 3 | 2 | 18 | 2015 |
| 11,6 | 9,1  | 0,6 | 2 | 2 | 20 | 2004 |
| 14   | 16   | 0,6 | 2 | 2 | 22 | 2003 |
| 14   | 16   | 0,6 | 4 | 2 | 20 | 2009 |
| 14   | 16   | 0,6 | 5 | 2 | 22 | 2009 |
| 14   | 16   | 0,6 | 3 | 2 | 23 | 2010 |
| 14   | 16   | 0,6 | 3 | 2 | 23 | 2010 |
| 14   | 16   | 0,6 | 3 | 2 | 19 | 2012 |
| 14   | 16   | 0,6 | 2 | 2 | 18 | 2015 |
| 15,8 | 23   | 0,6 | 3 | 2 | 18 | 2001 |
| 15,8 | 23   | 0,6 | 3 | 2 | 20 | 2001 |
| 15,8 | 23   | 0,6 | 4 | 2 | 22 | 2004 |

|      |      |     |   |   |    |      |
|------|------|-----|---|---|----|------|
| 19   | 40   | 0,6 | 8 | 2 | 19 | 2013 |
| 14,2 | 16,7 | 0,6 | 2 | 2 | 20 | 2003 |
| 14,2 | 16,7 | 0,6 | 4 | 2 | 19 | 2005 |
| 13,7 | 15   | 0,6 | 2 | 2 | 21 | 2013 |
| 14,9 | 19,3 | 0,6 | 3 | 2 | 17 | 2014 |
| 15,3 | 20,9 | 0,6 | 9 | 2 | 25 | 2005 |
| 15,3 | 20,9 | 0,6 | 6 | 2 | 22 | 2011 |
| 15,3 | 20,9 | 0,6 | 4 | 2 | 19 | 2015 |
| 12,5 | 11,4 | 0,6 | 1 | 2 | 26 | 2001 |
| 12,5 | 11,4 | 0,6 | 2 | 2 | 21 | 2006 |
| 12,5 | 11,4 | 0,6 | 3 | 2 | 19 | 2008 |
| 12,5 | 11,4 | 0,6 | 4 | 2 | 26 | 2009 |
| 12,5 | 11,4 | 0,6 | 2 | 2 | 21 | 2011 |
| 12,5 | 11,4 | 0,6 | 2 | 2 | 22 | 2011 |
| 16,6 | 26,7 | 0,6 | 5 | 2 | 23 | 2001 |
| 15   | 19,7 | 0,6 | 3 | 2 | 19 | 2008 |
| 15   | 19,7 | 0,6 | 4 | 2 | 19 | 2013 |
| 15   | 19,7 | 0,6 | 4 | 2 | 18 | 2015 |
| 12,2 | 10,6 | 0,6 | 2 | 2 | 22 | 2011 |
| 15,1 | 20,1 | 0,6 | 3 | 2 | 18 | 2004 |
| 15,1 | 20,1 | 0,6 | 4 | 2 | 20 | 2007 |
| 15,1 | 20,1 | 0,6 | 4 | 2 | 19 | 2012 |
| 14,5 | 17,8 | 0,6 | 3 | 2 | 20 | 2000 |
| 14,5 | 17,8 | 0,6 | 4 | 2 | 21 | 2009 |
| 14,5 | 17,8 | 0,6 | 3 | 2 | 21 | 2015 |
| 15,7 | 22,6 | 0,6 | 4 | 2 | 22 | 2011 |
| 20,7 | 51,8 | 0,6 | 8 | 2 | 21 | 2010 |
| 20,7 | 51,8 | 0,6 | 8 | 2 | 21 | 2010 |

|      |      |     |   |   |    |      |
|------|------|-----|---|---|----|------|
| 17   | 28,7 | 0,6 | 6 | 2 | 19 | 2013 |
| 16,8 | 27,7 | 0,6 | 6 | 2 | 22 | 2001 |
| 16,8 | 27,7 | 0,6 | 6 | 2 | 17 | 2008 |
| 13,6 | 14,7 | 0,6 | 2 | 2 | 18 | 2000 |
| 13,6 | 14,7 | 0,6 | 2 | 2 | 23 | 2009 |
| 13,9 | 15,7 | 0,6 | 3 | 2 | 23 | 2008 |
| 13,9 | 15,7 | 0,6 | 3 | 2 | 21 | 2014 |
| 13,9 | 15,7 | 0,6 | 3 | 2 | 18 | 2015 |
| 18   | 34,1 | 0,6 | 5 | 2 | 20 | 2013 |
| 15,6 | 22,2 | 0,6 | 5 | 2 | 19 | 2012 |
| 15,6 | 22,2 | 0,6 | 7 | 2 | 20 | 2012 |
| 14,3 | 17,1 | 0,6 | 2 | 2 | 22 | 2001 |
| 14,3 | 17,1 | 0,6 | 4 | 2 | 23 | 2004 |
| 14,3 | 17,1 | 0,6 | 3 | 2 | 23 | 2010 |
| 14,3 | 17,1 | 0,6 | 3 | 2 | 23 | 2010 |
| 14,3 | 17,1 | 0,6 | 5 | 2 | 18 | 2012 |
| 14,3 | 17,1 | 0,6 | 3 | 2 | 18 | 2015 |
| 12,6 | 11,7 | 0,6 | 2 | 2 | 19 | 2006 |
| 12,6 | 11,7 | 0,6 | 2 | 2 | 22 | 2009 |
| 14,1 | 16,4 | 0,6 | 2 | 2 | 17 | 2012 |
| 14,1 | 16,4 | 0,6 | 3 | 2 | 20 | 2013 |
| 14,1 | 16,4 | 0,6 | 3 | 2 | 17 | 2014 |
| 14,1 | 16,4 | 0,6 | 3 | 2 | 19 | 2014 |
| 13,5 | 14,4 | 0,6 | 2 | 2 | 18 | 2000 |
| 13,5 | 14,4 | 0,6 | 2 | 2 | 20 | 2001 |
| 13,5 | 14,4 | 0,6 | 2 | 2 | 20 | 2009 |
| 13,5 | 14,4 | 0,6 | 2 | 2 | 23 | 2009 |
| 13,5 | 14,4 | 0,6 | 2 | 2 | 26 | 2009 |

|      |      |     |    |   |    |      |
|------|------|-----|----|---|----|------|
| 13,5 | 14,4 | 0,6 | 3  | 2 | 22 | 2011 |
| 13,5 | 14,4 | 0,6 | 2  | 2 | 19 | 2013 |
| 15,5 | 21,8 | 0,6 | 8  | 2 | 26 | 2009 |
| 16,5 | 26,3 | 0,6 | 4  | 2 | 18 | 2015 |
| 14,7 | 18,6 | 0,6 | 5  | 2 | 19 | 1999 |
| 14,7 | 18,6 | 0,6 | 4  | 2 | 22 | 2009 |
| 12,3 | 10,9 | 0,6 | 2  | 2 | 26 | 2001 |
| 12,7 | 12   | 0,6 | 2  | 2 | 22 | 2000 |
| 12,7 | 12   | 0,6 | 2  | 2 | 19 | 2002 |
| 12,7 | 12   | 0,6 | 2  | 2 | 20 | 2006 |
| 12,7 | 12   | 0,6 | 3  | 2 | 18 | 2014 |
| 16,6 | 26,8 | 0,6 | 5  | 2 | 19 | 2013 |
| 16,6 | 26,8 | 0,6 | 3  | 2 | 17 | 2014 |
| 16   | 24   | 0,6 | 6  | 2 | 19 | 2001 |
| 16   | 24   | 0,6 | 10 | 2 | 18 | 2015 |
| 15,4 | 21,4 | 0,6 | 3  | 2 | 15 | 2015 |
| 17,1 | 29,3 | 0,6 | 4  | 2 | 19 | 2013 |
| 13,8 | 15,4 | 0,6 | 2  | 2 | 20 | 2002 |
| 13,8 | 15,4 | 0,6 | 3  | 2 | 17 | 2014 |
| 14,8 | 19   | 0,6 | 3  | 2 | 18 | 2007 |
| 14,8 | 19   | 0,6 | 3  | 2 | 20 | 2013 |
| 16,7 | 27,3 | 0,6 | 3  | 2 | 19 | 2000 |
| 17   | 28,8 | 0,6 | 5  | 2 | 18 | 2000 |
| 17   | 28,8 | 0,6 | 6  | 2 | 21 | 2010 |
| 17   | 28,8 | 0,6 | 6  | 2 | 21 | 2010 |
| 17   | 28,8 | 0,6 | 4  | 2 | 19 | 2013 |
| 15,3 | 21   | 0,6 | 4  | 2 | 20 | 2012 |
| 15,3 | 21   | 0,6 | 6  | 2 | 19 | 2013 |

|      |      |     |   |   |    |      |
|------|------|-----|---|---|----|------|
| 15,3 | 21   | 0,6 | 4 | 2 | 19 | 2015 |
| 14,9 | 19,4 | 0,6 | 4 | 2 | 17 | 2009 |
| 12,8 | 12,3 | 0,6 | 2 | 2 | 17 | 2002 |
| 12,8 | 12,3 | 0,6 | 2 | 2 | 18 | 2014 |
| 12,8 | 12,3 | 0,6 | 2 | 2 | 21 | 2014 |
| 13,3 | 13,8 | 0,6 | 2 | 2 | 22 | 2005 |
| 13,3 | 13,8 | 0,6 | 3 | 2 | 18 | 2008 |
| 15,7 | 22,7 | 0,6 | 4 | 2 | 25 | 2004 |
| 15,7 | 22,7 | 0,6 | 5 | 2 | 19 | 2010 |
| 15,7 | 22,7 | 0,6 | 5 | 2 | 19 | 2010 |
| 15,2 | 20,6 | 0,6 | 3 | 2 | 25 | 2003 |
| 15   | 19,8 | 0,6 | 4 | 2 | 24 | 2006 |
| 15   | 19,8 | 0,6 | 6 | 2 | 20 | 2008 |
| 15,1 | 20,2 | 0,6 | 4 | 2 | 19 | 2014 |
| 14   | 16,1 | 0,6 | 2 | 2 | 18 | 2000 |
| 14   | 16,1 | 0,6 | 3 | 2 | 25 | 2003 |
| 14   | 16,1 | 0,6 | 3 | 2 | 19 | 2006 |
| 14   | 16,1 | 0,6 | 3 | 2 | 20 | 2008 |
| 14   | 16,1 | 0,6 | 4 | 2 | 21 | 2011 |
| 14   | 16,1 | 0,6 | 4 | 2 | 22 | 2011 |
| 14   | 16,1 | 0,6 | 4 | 2 | 19 | 2012 |
| 14,2 | 16,8 | 0,6 | 5 | 2 | 22 | 1999 |
| 14,2 | 16,8 | 0,6 | 2 | 2 | 22 | 2003 |
| 14,2 | 16,8 | 0,6 | 4 | 2 | 20 | 2004 |
| 14,2 | 16,8 | 0,6 | 6 | 2 | 18 | 2008 |
| 14,2 | 16,8 | 0,6 | 4 | 2 | 23 | 2011 |
| 14,2 | 16,8 | 0,6 | 2 | 2 | 19 | 2013 |
| 14,2 | 16,8 | 0,6 | 2 | 2 | 20 | 2013 |

|      |      |     |   |   |    |      |
|------|------|-----|---|---|----|------|
| 14,2 | 16,8 | 0,6 | 3 | 2 | 18 | 2014 |
| 14,2 | 16,8 | 0,6 | 3 | 2 | 21 | 2014 |
| 12,9 | 12,6 | 0,6 | 4 | 2 | 26 | 2006 |
| 12,9 | 12,6 | 0,6 | 3 | 2 | 18 | 2007 |
| 12,9 | 12,6 | 0,6 | 2 | 2 | 23 | 2007 |
| 12,9 | 12,6 | 0,6 | 2 | 2 | 18 | 2014 |
| 13,2 | 13,5 | 0,6 | 2 | 2 | 19 | 2001 |
| 13,2 | 13,5 | 0,6 | 3 | 2 | 20 | 2010 |
| 13,2 | 13,5 | 0,6 | 3 | 2 | 20 | 2010 |
| 13,2 | 13,5 | 0,6 | 5 | 2 | 21 | 2011 |
| 13,2 | 13,5 | 0,6 | 2 | 2 | 19 | 2013 |
| 13,2 | 13,5 | 0,6 | 2 | 2 | 19 | 2013 |
| 19,1 | 40,9 | 0,6 | 8 | 2 | 18 | 2015 |
| 12,1 | 10,4 | 0,6 | 2 | 2 | 22 | 2007 |
| 12,1 | 10,4 | 0,6 | 2 | 2 | 22 | 2015 |
| 16,1 | 24,5 | 0,6 | 3 | 2 | 20 | 2001 |
| 15,9 | 23,6 | 0,6 | 3 | 2 | 20 | 2003 |
| 15,9 | 23,6 | 0,6 | 4 | 2 | 19 | 2007 |
| 14,5 | 17,9 | 0,6 | 4 | 2 | 20 | 2011 |
| 13   | 12,9 | 0,6 | 3 | 2 | 23 | 2007 |
| 13   | 12,9 | 0,6 | 2 | 2 | 23 | 2010 |
| 13   | 12,9 | 0,6 | 2 | 2 | 23 | 2010 |
| 13   | 12,9 | 0,6 | 2 | 2 | 22 | 2011 |
| 13   | 12,9 | 0,6 | 2 | 2 | 19 | 2013 |
| 13,1 | 13,2 | 0,6 | 2 | 2 | 24 | 2006 |
| 13,1 | 13,2 | 0,6 | 2 | 2 | 23 | 2011 |
| 13,7 | 15,1 | 0,6 | 3 | 2 | 21 | 2003 |
| 13,7 | 15,1 | 0,6 | 6 | 2 | 19 | 2009 |

|      |      |     |   |   |    |      |
|------|------|-----|---|---|----|------|
| 13,7 | 15,1 | 0,6 | 3 | 2 | 20 | 2009 |
| 13,7 | 15,1 | 0,6 | 4 | 2 | 20 | 2009 |
| 13,7 | 15,1 | 0,6 | 3 | 2 | 20 | 2011 |
| 13,7 | 15,1 | 0,6 | 4 | 2 | 15 | 2015 |
| 10,5 | 6,8  | 0,6 | 1 | 2 | 25 | 2005 |
| 12,4 | 11,2 | 0,6 | 2 | 2 | 19 | 2002 |
| 17,2 | 29,9 | 0,6 | 5 | 2 | 21 | 2010 |
| 17,2 | 29,9 | 0,6 | 5 | 2 | 21 | 2010 |
| 17,2 | 29,9 | 0,6 | 4 | 2 | 17 | 2014 |
| 17,5 | 31,5 | 0,6 | 5 | 2 | 20 | 2010 |
| 17,5 | 31,5 | 0,6 | 5 | 2 | 20 | 2010 |
| 14,6 | 18,3 | 0,6 | 4 | 2 | 25 | 2002 |
| 14,6 | 18,3 | 0,6 | 3 | 2 | 23 | 2002 |
| 14,6 | 18,3 | 0,6 | 3 | 2 | 20 | 2008 |
| 16,2 | 25   | 0,6 | 4 | 2 | 19 | 2013 |
| 16,6 | 26,9 | 0,6 | 4 | 2 | 21 | 2014 |
| 15,8 | 23,2 | 0,6 | 6 | 2 | 16 | 2008 |
| 15,8 | 23,2 | 0,6 | 3 | 2 | 19 | 2010 |
| 15,8 | 23,2 | 0,6 | 3 | 2 | 19 | 2010 |
| 15,8 | 23,2 | 0,6 | 4 | 2 | 18 | 2015 |
| 14,3 | 17,2 | 0,6 | 3 | 2 | 23 | 2010 |
| 14,3 | 17,2 | 0,6 | 3 | 2 | 23 | 2010 |
| 14,3 | 17,2 | 0,6 | 4 | 2 | 20 | 2011 |
| 14,3 | 17,2 | 0,6 | 4 | 2 | 19 | 2011 |
| 14,3 | 17,2 | 0,6 | 3 | 2 | 18 | 2014 |
| 14,3 | 17,2 | 0,6 | 3 | 2 | 16 | 2015 |
| 16,7 | 27,4 | 0,6 | 4 | 2 | 18 | 2001 |
| 13,9 | 15,8 | 0,6 | 2 | 2 | 26 | 2003 |

|      |      |     |   |   |    |      |
|------|------|-----|---|---|----|------|
| 13,9 | 15,8 | 0,6 | 4 | 2 | 21 | 2008 |
| 13,9 | 15,8 | 0,6 | 2 | 2 | 19 | 2014 |
| 13,6 | 14,8 | 0,6 | 2 | 2 | 22 | 2003 |
| 16   | 24,1 | 0,6 | 4 | 2 | 21 | 2003 |
| 16,9 | 28,4 | 0,6 | 5 | 2 | 21 | 2013 |
| 14,1 | 16,5 | 0,6 | 3 | 2 | 26 | 2003 |
| 14,1 | 16,5 | 0,6 | 3 | 2 | 19 | 2006 |
| 14,1 | 16,5 | 0,6 | 5 | 2 | 22 | 2007 |
| 14,1 | 16,5 | 0,6 | 5 | 2 | 22 | 2007 |
| 14,1 | 16,5 | 0,6 | 3 | 2 | 23 | 2015 |
| 15,4 | 21,5 | 0,6 | 4 | 2 | 16 | 2008 |
| 15,3 | 21,1 | 0,6 | 3 | 2 | 18 | 2014 |
| 15,7 | 22,8 | 0,6 | 4 | 2 | 19 | 2001 |
| 14,8 | 19,1 | 0,6 | 4 | 2 | 26 | 2009 |
| 14,8 | 19,1 | 0,6 | 4 | 2 | 23 | 2010 |
| 14,8 | 19,1 | 0,6 | 4 | 2 | 23 | 2010 |
| 13,5 | 14,5 | 0,6 | 2 | 2 | 19 | 2002 |
| 13,5 | 14,5 | 0,6 | 3 | 2 | 26 | 2006 |
| 13,5 | 14,5 | 0,6 | 2 | 2 | 19 | 2009 |
| 13,5 | 14,5 | 0,6 | 3 | 2 | 22 | 2011 |
| 13,5 | 14,5 | 0,6 | 2 | 2 | 19 | 2013 |
| 13,5 | 14,5 | 0,6 | 2 | 2 | 19 | 2013 |
| 15,2 | 20,7 | 0,6 | 3 | 2 | 18 | 2001 |
| 15,2 | 20,7 | 0,6 | 3 | 2 | 19 | 2010 |
| 15,2 | 20,7 | 0,6 | 3 | 2 | 19 | 2010 |
| 15,2 | 20,7 | 0,6 | 4 | 2 | 21 | 2011 |
| 15,2 | 20,7 | 0,6 | 3 | 2 | 15 | 2015 |
| 15,2 | 20,7 | 0,6 | 4 | 2 | 21 | 2015 |

|      |      |     |   |   |    |      |
|------|------|-----|---|---|----|------|
| 16,4 | 26   | 0,6 | 6 | 2 | 23 | 2008 |
| 16,1 | 24,6 | 0,6 | 5 | 2 | 19 | 2012 |
| 14,9 | 19,5 | 0,6 | 4 | 2 | 19 | 2012 |
| 15,1 | 20,3 | 0,6 | 4 | 2 | 19 | 1999 |
| 15,1 | 20,3 | 0,6 | 4 | 2 | 20 | 2001 |
| 15   | 19,9 | 0,6 | 3 | 2 | 23 | 2001 |
| 15   | 19,9 | 0,6 | 4 | 2 | 25 | 2004 |
| 15   | 19,9 | 0,6 | 5 | 2 | 22 | 2005 |
| 15   | 19,9 | 0,6 | 3 | 2 | 20 | 2012 |
| 15   | 19,9 | 0,6 | 3 | 2 | 18 | 2014 |
| 15   | 19,9 | 0,6 | 3 | 2 | 19 | 2014 |
| 13,8 | 15,5 | 0,6 | 2 | 2 | 24 | 2006 |
| 13,8 | 15,5 | 0,6 | 3 | 2 | 18 | 2014 |
| 13,8 | 15,5 | 0,6 | 3 | 2 | 16 | 2015 |
| 18   | 34,4 | 0,6 | 4 | 2 | 19 | 2013 |
| 12,6 | 11,8 | 0,6 | 2 | 2 | 21 | 2010 |
| 12,6 | 11,8 | 0,6 | 2 | 2 | 21 | 2010 |
| 16,5 | 26,5 | 0,6 | 5 | 2 | 20 | 2003 |
| 18,8 | 39,2 | 0,6 | 4 | 2 | 19 | 2010 |
| 18,8 | 39,2 | 0,6 | 4 | 2 | 19 | 2010 |
| 17,1 | 29,5 | 0,6 | 5 | 2 | 21 | 2000 |
| 15,6 | 22,4 | 0,6 | 6 | 2 | 23 | 2010 |
| 15,6 | 22,4 | 0,6 | 6 | 2 | 23 | 2010 |
| 15,6 | 22,4 | 0,6 | 3 | 2 | 19 | 2013 |
| 15,6 | 22,4 | 0,6 | 4 | 2 | 15 | 2015 |
| 13,4 | 14,2 | 0,6 | 2 | 2 | 24 | 2002 |
| 13,4 | 14,2 | 0,6 | 2 | 2 | 23 | 2010 |
| 13,4 | 14,2 | 0,6 | 2 | 2 | 23 | 2010 |

|      |      |     |    |   |    |      |
|------|------|-----|----|---|----|------|
| 13,4 | 14,2 | 0,6 | 2  | 2 | 20 | 2013 |
| 13,4 | 14,2 | 0,6 | 2  | 2 | 20 | 2013 |
| 14,2 | 16,9 | 0,6 | 2  | 2 | 26 | 2000 |
| 14,2 | 16,9 | 0,6 | 4  | 2 | 21 | 2001 |
| 14,2 | 16,9 | 0,6 | 3  | 2 | 18 | 2008 |
| 14,2 | 16,9 | 0,6 | 3  | 2 | 23 | 2010 |
| 14,2 | 16,9 | 0,6 | 3  | 2 | 23 | 2010 |
| 14,2 | 16,9 | 0,6 | 2  | 2 | 19 | 2013 |
| 14,2 | 16,9 | 0,6 | 3  | 2 | 17 | 2014 |
| 17   | 29   | 0,6 | 5  | 2 | 20 | 2010 |
| 17   | 29   | 0,6 | 5  | 2 | 20 | 2010 |
| 12   | 10,2 | 0,6 | 2  | 2 | 25 | 2007 |
| 12   | 10,2 | 0,6 | 2  | 2 | 19 | 2013 |
| 16,2 | 25,1 | 0,6 | 10 | 2 | 23 | 2005 |
| 14   | 16,2 | 0,6 | 3  | 2 | 23 | 2005 |
| 14   | 16,2 | 0,6 | 4  | 2 | 23 | 2011 |
| 14   | 16,2 | 0,6 | 2  | 2 | 19 | 2013 |
| 14,5 | 18   | 0,6 | 4  | 2 | 20 | 1999 |
| 14,5 | 18   | 0,6 | 5  | 2 | 21 | 1999 |
| 14,5 | 18   | 0,6 | 5  | 2 | 23 | 2009 |
| 14,5 | 18   | 0,6 | 3  | 2 | 19 | 2014 |
| 14,5 | 18   | 0,6 | 4  | 2 | 18 | 2015 |
| 16,9 | 28,5 | 0,6 | 4  | 2 | 20 | 2001 |
| 12,7 | 12,1 | 0,6 | 2  | 2 | 21 | 2005 |
| 12,7 | 12,1 | 0,6 | 2  | 2 | 22 | 2009 |
| 15,8 | 23,3 | 0,6 | 3  | 2 | 18 | 2000 |
| 16   | 24,2 | 0,6 | 5  | 2 | 20 | 2000 |
| 16   | 24,2 | 0,6 | 3  | 2 | 22 | 2003 |

|      |      |     |   |   |    |      |
|------|------|-----|---|---|----|------|
| 13,3 | 13,9 | 0,6 | 2 | 2 | 18 | 2000 |
| 13,3 | 13,9 | 0,6 | 5 | 2 | 19 | 2007 |
| 13,3 | 13,9 | 0,6 | 2 | 2 | 19 | 2009 |
| 13,3 | 13,9 | 0,6 | 6 | 2 | 24 | 2009 |
| 13,3 | 13,9 | 0,6 | 2 | 2 | 23 | 2010 |
| 13,3 | 13,9 | 0,6 | 8 | 2 | 23 | 2010 |
| 13,3 | 13,9 | 0,6 | 2 | 2 | 23 | 2010 |
| 13,3 | 13,9 | 0,6 | 8 | 2 | 23 | 2010 |
| 13,3 | 13,9 | 0,6 | 3 | 2 | 21 | 2011 |
| 13,3 | 13,9 | 0,6 | 2 | 2 | 23 | 2011 |
| 13,3 | 13,9 | 0,6 | 2 | 2 | 19 | 2013 |
| 13,3 | 13,9 | 0,6 | 2 | 2 | 18 | 2014 |
| 16,3 | 25,6 | 0,6 | 5 | 2 | 22 | 2004 |
| 12,3 | 11   | 0,6 | 2 | 2 | 20 | 2002 |
| 12,3 | 11   | 0,6 | 3 | 2 | 25 | 2004 |
| 12,3 | 11   | 0,6 | 2 | 2 | 23 | 2010 |
| 12,3 | 11   | 0,6 | 2 | 2 | 23 | 2010 |
| 13,7 | 15,2 | 0,6 | 2 | 2 | 22 | 1999 |
| 13,7 | 15,2 | 0,6 | 2 | 2 | 21 | 2008 |
| 13,7 | 15,2 | 0,6 | 3 | 2 | 23 | 2010 |
| 13,7 | 15,2 | 0,6 | 3 | 2 | 23 | 2010 |
| 13,2 | 13,6 | 0,6 | 3 | 2 | 20 | 2008 |
| 13,2 | 13,6 | 0,6 | 3 | 2 | 19 | 2010 |
| 13,2 | 13,6 | 0,6 | 3 | 2 | 19 | 2010 |
| 13,2 | 13,6 | 0,6 | 2 | 2 | 19 | 2013 |
| 13,2 | 13,6 | 0,6 | 2 | 2 | 19 | 2013 |
| 15,4 | 21,6 | 0,6 | 3 | 2 | 19 | 2002 |
| 18   | 34,5 | 0,6 | 8 | 2 | 20 | 2010 |

|      |      |     |   |   |    |      |
|------|------|-----|---|---|----|------|
| 18   | 34,5 | 0,6 | 8 | 2 | 20 | 2010 |
| 12,9 | 12,7 | 0,6 | 2 | 2 | 19 | 2013 |
| 12,9 | 12,7 | 0,6 | 2 | 2 | 17 | 2014 |
| 12,9 | 12,7 | 0,6 | 2 | 2 | 18 | 2014 |
| 13,1 | 13,3 | 0,6 | 2 | 2 | 21 | 2000 |
| 13,1 | 13,3 | 0,6 | 2 | 2 | 23 | 2003 |
| 13,1 | 13,3 | 0,6 | 2 | 2 | 19 | 2013 |
| 13,1 | 13,3 | 0,6 | 3 | 2 | 15 | 2015 |
| 14,3 | 17,3 | 0,6 | 3 | 2 | 18 | 2008 |
| 14,3 | 17,3 | 0,6 | 2 | 2 | 21 | 2008 |
| 14,3 | 17,3 | 0,6 | 4 | 2 | 26 | 2009 |
| 14,3 | 17,3 | 0,6 | 4 | 2 | 22 | 2011 |
| 16,4 | 26,1 | 0,6 | 5 | 2 | 19 | 2000 |
| 13   | 13   | 0,6 | 2 | 2 | 21 | 2006 |
| 13   | 13   | 0,6 | 2 | 2 | 17 | 2014 |
| 13   | 13   | 0,6 | 2 | 2 | 19 | 2014 |
| 15,7 | 22,9 | 0,6 | 3 | 2 | 18 | 2000 |
| 15,7 | 22,9 | 0,6 | 5 | 2 | 26 | 2000 |
| 15,7 | 22,9 | 0,6 | 4 | 2 | 19 | 2002 |
| 15,7 | 22,9 | 0,6 | 4 | 2 | 22 | 2003 |
| 16,1 | 24,7 | 0,6 | 3 | 2 | 21 | 2010 |
| 16,1 | 24,7 | 0,6 | 3 | 2 | 21 | 2010 |
| 15,3 | 21,2 | 0,6 | 3 | 2 | 21 | 2000 |
| 15,3 | 21,2 | 0,6 | 4 | 2 | 22 | 2004 |
| 13,9 | 15,9 | 0,6 | 2 | 2 | 24 | 2001 |
| 13,9 | 15,9 | 0,6 | 3 | 2 | 25 | 2005 |
| 15,9 | 23,8 | 0,6 | 4 | 2 | 21 | 2005 |
| 16,5 | 26,6 | 0,6 | 6 | 2 | 17 | 2009 |

|      |      |     |   |   |    |      |
|------|------|-----|---|---|----|------|
| 16,5 | 26,6 | 0,6 | 4 | 2 | 18 | 2015 |
| 14,1 | 16,6 | 0,6 | 3 | 2 | 21 | 2001 |
| 14,1 | 16,6 | 0,6 | 4 | 2 | 20 | 2009 |
| 14,1 | 16,6 | 0,6 | 5 | 2 | 23 | 2010 |
| 14,1 | 16,6 | 0,6 | 5 | 2 | 23 | 2010 |
| 14,1 | 16,6 | 0,6 | 3 | 2 | 16 | 2015 |
| 17,4 | 31,2 | 0,6 | 6 | 2 | 19 | 2010 |
| 17,4 | 31,2 | 0,6 | 6 | 2 | 19 | 2010 |
| 17,4 | 31,2 | 0,6 | 7 | 2 | 17 | 2014 |
| 14,8 | 19,2 | 0,6 | 2 | 2 | 19 | 2013 |
| 15,2 | 20,8 | 0,6 | 4 | 2 | 18 | 2001 |
| 15,2 | 20,8 | 0,6 | 4 | 2 | 19 | 2006 |
| 15,2 | 20,8 | 0,6 | 4 | 2 | 17 | 2009 |
| 13,6 | 14,9 | 0,6 | 4 | 2 | 19 | 1999 |
| 13,6 | 14,9 | 0,6 | 4 | 2 | 26 | 2006 |
| 13,6 | 14,9 | 0,6 | 2 | 2 | 22 | 2011 |
| 13,6 | 14,9 | 0,6 | 2 | 2 | 19 | 2014 |
| 14,9 | 19,6 | 0,6 | 4 | 2 | 19 | 2014 |
| 15,1 | 20,4 | 0,6 | 5 | 2 | 21 | 1999 |
| 15   | 20   | 0,6 | 4 | 2 | 23 | 2004 |
| 15   | 20   | 0,6 | 4 | 2 | 19 | 2007 |
| 15   | 20   | 0,6 | 4 | 2 | 22 | 2011 |
| 16,7 | 27,6 | 0,6 | 5 | 2 | 18 | 2000 |
| 16,7 | 27,6 | 0,6 | 7 | 2 | 18 | 2014 |
| 12,4 | 11,3 | 0,6 | 2 | 2 | 23 | 2007 |
| 12,1 | 10,5 | 0,6 | 2 | 2 | 26 | 2006 |
| 16,2 | 25,2 | 0,6 | 6 | 2 | 20 | 2003 |
| 14,4 | 17,7 | 0,6 | 4 | 2 | 20 | 2011 |

|      |      |     |   |   |    |      |
|------|------|-----|---|---|----|------|
| 15,8 | 23,4 | 0,6 | 4 | 2 | 22 | 2004 |
| 15,8 | 23,4 | 0,6 | 5 | 2 | 24 | 2006 |
| 15,8 | 23,4 | 0,6 | 3 | 2 | 21 | 2015 |
| 16   | 24,3 | 0,6 | 5 | 2 | 20 | 2001 |
| 16   | 24,3 | 0,6 | 6 | 2 | 20 | 2010 |
| 16   | 24,3 | 0,6 | 6 | 2 | 20 | 2010 |
| 16   | 24,3 | 0,6 | 5 | 2 | 18 | 2012 |
| 16   | 24,3 | 0,6 | 4 | 2 | 19 | 2014 |
| 16   | 24,3 | 0,6 | 7 | 2 | 21 | 2014 |
| 16   | 24,3 | 0,6 | 4 | 2 | 21 | 2015 |
| 13,5 | 14,6 | 0,6 | 3 | 2 | 23 | 2005 |
| 13,5 | 14,6 | 0,6 | 3 | 2 | 19 | 2007 |
| 13,5 | 14,6 | 0,6 | 2 | 2 | 17 | 2008 |
| 13,5 | 14,6 | 0,6 | 3 | 2 | 20 | 2008 |
| 16,3 | 25,7 | 0,6 | 6 | 2 | 18 | 2014 |
| 15,5 | 22,1 | 0,6 | 7 | 2 | 21 | 1999 |
| 15,5 | 22,1 | 0,6 | 5 | 2 | 18 | 2000 |
| 13,8 | 15,6 | 0,6 | 2 | 2 | 25 | 2003 |
| 13,8 | 15,6 | 0,6 | 3 | 2 | 19 | 2007 |
| 18,6 | 38,2 | 0,6 | 6 | 2 | 15 | 2015 |
| 14,5 | 18,1 | 0,6 | 3 | 2 | 20 | 2008 |
| 14,5 | 18,1 | 0,6 | 4 | 2 | 19 | 2013 |
| 14,2 | 17   | 0,6 | 5 | 2 | 19 | 2010 |
| 14,2 | 17   | 0,6 | 5 | 2 | 19 | 2010 |
| 14,2 | 17   | 0,6 | 3 | 2 | 21 | 2014 |
| 12,5 | 11,6 | 0,6 | 2 | 2 | 23 | 2010 |
| 12,5 | 11,6 | 0,6 | 2 | 2 | 23 | 2010 |
| 14   | 16,3 | 0,6 | 3 | 2 | 19 | 2005 |

|      |      |     |    |   |    |      |
|------|------|-----|----|---|----|------|
| 14   | 16,3 | 0,6 | 2  | 2 | 17 | 2012 |
| 14   | 16,3 | 0,6 | 3  | 2 | 20 | 2012 |
| 14   | 16,3 | 0,6 | 3  | 2 | 18 | 2014 |
| 14   | 16,3 | 0,6 | 3  | 2 | 21 | 2014 |
| 20,3 | 49,7 | 0,6 | 5  | 2 | 19 | 2010 |
| 20,3 | 49,7 | 0,6 | 5  | 2 | 19 | 2010 |
| 15,4 | 21,7 | 0,6 | 3  | 2 | 25 | 2004 |
| 15,4 | 21,7 | 0,6 | 4  | 2 | 22 | 2011 |
| 15,4 | 21,7 | 0,6 | 4  | 2 | 16 | 2015 |
| 16,1 | 24,8 | 0,6 | 5  | 2 | 19 | 2004 |
| 16,1 | 24,8 | 0,6 | 4  | 2 | 21 | 2013 |
| 13,4 | 14,3 | 0,6 | 5  | 2 | 22 | 2009 |
| 13,4 | 14,3 | 0,6 | 2  | 2 | 23 | 2009 |
| 13,4 | 14,3 | 0,6 | 3  | 2 | 24 | 2009 |
| 13,4 | 14,3 | 0,6 | 2  | 2 | 19 | 2010 |
| 13,4 | 14,3 | 0,6 | 2  | 2 | 19 | 2010 |
| 13,4 | 14,3 | 0,6 | 2  | 2 | 22 | 2011 |
| 13,4 | 14,3 | 0,6 | 2  | 2 | 19 | 2013 |
| 13,4 | 14,3 | 0,6 | 3  | 2 | 18 | 2014 |
| 13,4 | 14,3 | 0,6 | 2  | 2 | 21 | 2014 |
| 16,5 | 26,7 | 0,6 | 5  | 2 | 20 | 2010 |
| 16,5 | 26,7 | 0,6 | 6  | 2 | 21 | 2010 |
| 16,5 | 26,7 | 0,6 | 5  | 2 | 20 | 2010 |
| 16,5 | 26,7 | 0,6 | 6  | 2 | 21 | 2010 |
| 21,6 | 59,9 | 0,6 | 10 | 2 | 19 | 2010 |
| 21,6 | 59,9 | 0,6 | 10 | 2 | 19 | 2010 |
| 14,6 | 18,5 | 0,6 | 3  | 2 | 18 | 2014 |
| 14,6 | 18,5 | 0,6 | 3  | 2 | 18 | 2014 |

|      |      |     |   |   |    |      |
|------|------|-----|---|---|----|------|
| 15,9 | 23,9 | 0,6 | 3 | 2 | 19 | 2014 |
| 16,9 | 28,7 | 0,6 | 4 | 2 | 19 | 2013 |
| 16,6 | 27,2 | 0,6 | 4 | 2 | 19 | 2002 |
| 15,3 | 21,3 | 0,6 | 3 | 2 | 22 | 1999 |
| 15,3 | 21,3 | 0,6 | 5 | 2 | 20 | 2007 |
| 16,7 | 27,7 | 0,6 | 6 | 2 | 23 | 2003 |
| 12,2 | 10,8 | 0,6 | 2 | 2 | 22 | 2007 |
| 14,7 | 18,9 | 0,6 | 6 | 2 | 24 | 2006 |
| 13,7 | 15,3 | 0,6 | 2 | 2 | 22 | 2000 |
| 13,7 | 15,3 | 0,6 | 2 | 2 | 22 | 2003 |
| 13,7 | 15,3 | 0,6 | 4 | 2 | 20 | 2009 |
| 13,7 | 15,3 | 0,6 | 3 | 2 | 21 | 2010 |
| 13,7 | 15,3 | 0,6 | 3 | 2 | 21 | 2010 |
| 13,7 | 15,3 | 0,6 | 2 | 2 | 20 | 2013 |
| 13,7 | 15,3 | 0,6 | 2 | 2 | 20 | 2013 |
| 13,3 | 14   | 0,6 | 2 | 2 | 19 | 2002 |
| 13,3 | 14   | 0,6 | 2 | 2 | 25 | 2003 |
| 16,2 | 25,3 | 0,6 | 5 | 2 | 19 | 2004 |
| 15,2 | 20,9 | 0,6 | 3 | 2 | 20 | 2001 |
| 15,2 | 20,9 | 0,6 | 3 | 2 | 20 | 2001 |
| 15,2 | 20,9 | 0,6 | 3 | 2 | 17 | 2008 |
| 15,2 | 20,9 | 0,6 | 5 | 2 | 23 | 2009 |
| 15,2 | 20,9 | 0,6 | 4 | 2 | 19 | 2013 |
| 15,2 | 20,9 | 0,6 | 3 | 2 | 18 | 2015 |
| 15,6 | 22,6 | 0,6 | 3 | 2 | 20 | 2003 |
| 15,6 | 22,6 | 0,6 | 3 | 2 | 19 | 2004 |
| 15,6 | 22,6 | 0,6 | 5 | 2 | 18 | 2014 |
| 14,8 | 19,3 | 0,6 | 5 | 2 | 19 | 2007 |

|      |      |     |   |   |    |      |
|------|------|-----|---|---|----|------|
| 15,1 | 20,5 | 0,6 | 3 | 2 | 20 | 2003 |
| 15,1 | 20,5 | 0,6 | 4 | 2 | 21 | 2003 |
| 17,2 | 30,3 | 0,6 | 5 | 2 | 21 | 2010 |
| 17,2 | 30,3 | 0,6 | 5 | 2 | 21 | 2010 |
| 18,2 | 35,9 | 0,6 | 7 | 2 | 17 | 2014 |
| 15   | 20,1 | 0,6 | 3 | 2 | 20 | 2000 |
| 15   | 20,1 | 0,6 | 3 | 2 | 25 | 2003 |
| 15   | 20,1 | 0,6 | 3 | 2 | 20 | 2011 |
| 15   | 20,1 | 0,6 | 4 | 2 | 17 | 2012 |
| 15   | 20,1 | 0,6 | 3 | 2 | 15 | 2015 |
| 15   | 20,1 | 0,6 | 3 | 2 | 16 | 2015 |
| 12,7 | 12,2 | 0,6 | 2 | 2 | 19 | 2002 |
| 13,2 | 13,7 | 0,6 | 2 | 2 | 20 | 2000 |
| 13,2 | 13,7 | 0,6 | 3 | 2 | 21 | 2008 |
| 13,2 | 13,7 | 0,6 | 2 | 2 | 23 | 2009 |
| 13,2 | 13,7 | 0,6 | 3 | 2 | 23 | 2010 |
| 13,2 | 13,7 | 0,6 | 3 | 2 | 23 | 2010 |
| 16   | 24,4 | 0,6 | 6 | 2 | 25 | 2007 |
| 14,1 | 16,7 | 0,6 | 2 | 2 | 17 | 2002 |
| 14,1 | 16,7 | 0,6 | 4 | 2 | 20 | 2009 |
| 14,1 | 16,7 | 0,6 | 3 | 2 | 19 | 2014 |
| 13,9 | 16   | 0,6 | 2 | 2 | 22 | 2001 |
| 13,9 | 16   | 0,6 | 2 | 2 | 18 | 2014 |
| 17,8 | 33,6 | 0,6 | 5 | 2 | 20 | 2010 |
| 17,8 | 33,6 | 0,6 | 5 | 2 | 20 | 2010 |
| 12,8 | 12,5 | 0,6 | 2 | 2 | 21 | 2005 |
| 12,8 | 12,5 | 0,6 | 2 | 2 | 17 | 2014 |
| 13,1 | 13,4 | 0,6 | 3 | 2 | 19 | 2005 |

|      |      |     |   |   |    |      |
|------|------|-----|---|---|----|------|
| 13,1 | 13,4 | 0,6 | 2 | 2 | 26 | 2006 |
| 13,1 | 13,4 | 0,6 | 2 | 2 | 21 | 2008 |
| 13,1 | 13,4 | 0,6 | 2 | 2 | 20 | 2009 |
| 13,1 | 13,4 | 0,6 | 2 | 2 | 20 | 2011 |
| 13,1 | 13,4 | 0,6 | 2 | 2 | 23 | 2011 |
| 13,1 | 13,4 | 0,6 | 2 | 2 | 17 | 2014 |
| 13,1 | 13,4 | 0,6 | 2 | 2 | 18 | 2014 |
| 13,1 | 13,4 | 0,6 | 2 | 2 | 18 | 2014 |
| 13,1 | 13,4 | 0,6 | 2 | 2 | 18 | 2014 |
| 13,1 | 13,4 | 0,6 | 2 | 2 | 19 | 2014 |
| 12   | 10,3 | 0,6 | 2 | 2 | 23 | 2007 |
| 12   | 10,3 | 0,6 | 2 | 2 | 25 | 2007 |
| 12   | 10,3 | 0,6 | 2 | 2 | 19 | 2013 |
| 14,4 | 17,8 | 0,6 | 2 | 2 | 21 | 2000 |
| 14,4 | 17,8 | 0,6 | 4 | 2 | 21 | 2015 |
| 15,5 | 22,2 | 0,6 | 4 | 2 | 20 | 2013 |
| 15,5 | 22,2 | 0,6 | 7 | 2 | 18 | 2014 |
| 15,5 | 22,2 | 0,6 | 4 | 2 | 15 | 2015 |
| 15,5 | 22,2 | 0,6 | 3 | 2 | 18 | 2015 |
| 16,4 | 26,3 | 0,6 | 6 | 2 | 26 | 2001 |
| 13   | 13,1 | 0,6 | 2 | 2 | 26 | 2006 |
| 13   | 13,1 | 0,6 | 2 | 2 | 19 | 2013 |
| 13   | 13,1 | 0,6 | 1 | 2 | 22 | 2013 |
| 13   | 13,1 | 0,6 | 2 | 2 | 19 | 2014 |
| 13,6 | 15   | 0,6 | 2 | 2 | 19 | 2001 |
| 13,6 | 15   | 0,6 | 3 | 2 | 22 | 2007 |
| 13,6 | 15   | 0,6 | 2 | 2 | 23 | 2008 |
| 13,6 | 15   | 0,6 | 2 | 2 | 19 | 2013 |

|      |      |     |   |   |    |      |
|------|------|-----|---|---|----|------|
| 13,6 | 15   | 0,6 | 3 | 2 | 19 | 2014 |
| 12,3 | 11,1 | 0,6 | 2 | 2 | 18 | 2014 |
| 16,5 | 26,8 | 0,6 | 3 | 2 | 20 | 2003 |
| 18   | 34,8 | 0,6 | 4 | 2 | 19 | 2012 |
| 15,4 | 21,8 | 0,6 | 5 | 2 | 18 | 1999 |
| 15,4 | 21,8 | 0,6 | 6 | 2 | 19 | 2010 |
| 15,4 | 21,8 | 0,6 | 6 | 2 | 19 | 2010 |
| 17,7 | 33,1 | 0,6 | 6 | 2 | 20 | 2003 |
| 15,7 | 23,1 | 0,6 | 4 | 2 | 20 | 2011 |
| 14,5 | 18,2 | 0,6 | 2 | 2 | 20 | 2001 |
| 14,5 | 18,2 | 0,6 | 3 | 2 | 20 | 2013 |
| 14,5 | 18,2 | 0,6 | 2 | 2 | 17 | 2014 |
| 14,5 | 18,2 | 0,6 | 4 | 2 | 15 | 2015 |
| 14,5 | 18,2 | 0,6 | 3 | 2 | 18 | 2015 |
| 15,9 | 24   | 0,6 | 3 | 2 | 17 | 2014 |
| 14,2 | 17,1 | 0,6 | 2 | 2 | 20 | 2008 |
| 14,2 | 17,1 | 0,6 | 3 | 2 | 23 | 2008 |
| 14,2 | 17,1 | 0,6 | 4 | 2 | 20 | 2009 |
| 14,2 | 17,1 | 0,6 | 3 | 2 | 23 | 2015 |
| 13,8 | 15,7 | 0,6 | 3 | 2 | 22 | 2005 |
| 13,8 | 15,7 | 0,6 | 3 | 2 | 17 | 2014 |
| 13,5 | 14,7 | 0,6 | 2 | 2 | 23 | 2010 |
| 13,5 | 14,7 | 0,6 | 2 | 2 | 23 | 2010 |
| 13,5 | 14,7 | 0,6 | 2 | 2 | 19 | 2014 |
| 13,5 | 14,7 | 0,6 | 2 | 2 | 21 | 2014 |
| 13,5 | 14,7 | 0,6 | 2 | 2 | 23 | 2014 |
| 13,5 | 14,7 | 0,6 | 4 | 2 | 18 | 2015 |
| 15,3 | 21,4 | 0,6 | 3 | 2 | 21 | 2001 |

|      |      |     |   |   |    |      |
|------|------|-----|---|---|----|------|
| 14,6 | 18,6 | 0,6 | 3 | 2 | 21 | 2000 |
| 14,6 | 18,6 | 0,6 | 3 | 2 | 19 | 2008 |
| 14   | 16,4 | 0,6 | 2 | 2 | 21 | 2000 |
| 14   | 16,4 | 0,6 | 2 | 2 | 24 | 2001 |
| 14   | 16,4 | 0,6 | 3 | 2 | 18 | 2008 |
| 14   | 16,4 | 0,6 | 4 | 2 | 20 | 2012 |
| 14   | 16,4 | 0,6 | 3 | 2 | 19 | 2013 |
| 14   | 16,4 | 0,6 | 2 | 2 | 18 | 2014 |
| 14   | 16,4 | 0,6 | 3 | 2 | 21 | 2014 |
| 12,4 | 11,4 | 0,6 | 2 | 2 | 20 | 2004 |
| 15,6 | 22,7 | 0,6 | 4 | 2 | 22 | 2011 |
| 17,4 | 31,5 | 0,6 | 5 | 2 | 19 | 2013 |
| 15,2 | 21   | 0,6 | 5 | 2 | 17 | 2002 |
| 15,2 | 21   | 0,6 | 6 | 2 | 20 | 2007 |
| 15,2 | 21   | 0,6 | 3 | 2 | 15 | 2015 |
| 16,3 | 25,9 | 0,6 | 4 | 2 | 18 | 1999 |
| 16,3 | 25,9 | 0,6 | 4 | 2 | 22 | 2001 |
| 14,7 | 19   | 0,6 | 3 | 2 | 20 | 2008 |
| 14,7 | 19   | 0,6 | 4 | 2 | 21 | 2010 |
| 14,7 | 19   | 0,6 | 4 | 2 | 21 | 2010 |
| 14,7 | 19   | 0,6 | 4 | 2 | 23 | 2011 |
| 16   | 24,5 | 0,6 | 5 | 2 | 19 | 2014 |
| 16   | 24,5 | 0,6 | 4 | 2 | 21 | 2014 |
| 15,1 | 20,6 | 0,6 | 4 | 2 | 21 | 2006 |
| 15,1 | 20,6 | 0,6 | 3 | 2 | 20 | 2008 |
| 15,1 | 20,6 | 0,6 | 5 | 2 | 19 | 2009 |
| 11,5 | 9,1  | 0,6 | 2 | 2 | 23 | 2004 |
| 12,1 | 10,6 | 0,6 | 2 | 2 | 19 | 2007 |

|      |      |     |   |   |    |      |
|------|------|-----|---|---|----|------|
| 12,1 | 10,6 | 0,6 | 2 | 2 | 19 | 2007 |
| 14,8 | 19,4 | 0,6 | 5 | 2 | 18 | 2000 |
| 14,8 | 19,4 | 0,6 | 3 | 2 | 20 | 2001 |
| 14,3 | 17,5 | 0,6 | 4 | 2 | 23 | 2011 |
| 14,3 | 17,5 | 0,6 | 2 | 2 | 19 | 2012 |
| 14,3 | 17,5 | 0,6 | 3 | 2 | 18 | 2014 |
| 14,3 | 17,5 | 0,6 | 3 | 2 | 19 | 2014 |
| 14,3 | 17,5 | 0,6 | 3 | 2 | 21 | 2015 |
| 13,4 | 14,4 | 0,6 | 3 | 2 | 22 | 2005 |
| 13,4 | 14,4 | 0,6 | 3 | 2 | 20 | 2007 |
| 13,4 | 14,4 | 0,6 | 2 | 2 | 25 | 2008 |
| 16,4 | 26,4 | 0,6 | 5 | 2 | 18 | 2000 |
| 16,4 | 26,4 | 0,6 | 3 | 2 | 20 | 2003 |
| 15   | 20,2 | 0,6 | 6 | 2 | 23 | 2011 |
| 15   | 20,2 | 0,6 | 3 | 2 | 18 | 2014 |
| 14,9 | 19,8 | 0,6 | 5 | 2 | 21 | 2000 |
| 16,9 | 28,9 | 0,6 | 5 | 2 | 19 | 2014 |
| 16,5 | 26,9 | 0,6 | 5 | 2 | 18 | 2000 |
| 15,5 | 22,3 | 0,6 | 3 | 2 | 22 | 2001 |
| 15,5 | 22,3 | 0,6 | 5 | 2 | 22 | 2007 |
| 15,5 | 22,3 | 0,6 | 3 | 2 | 18 | 2015 |
| 13,7 | 15,4 | 0,6 | 2 | 2 | 22 | 2001 |
| 13,7 | 15,4 | 0,6 | 3 | 2 | 22 | 2004 |
| 13,7 | 15,4 | 0,6 | 3 | 2 | 24 | 2009 |
| 13,7 | 15,4 | 0,6 | 3 | 2 | 23 | 2011 |
| 13,7 | 15,4 | 0,6 | 2 | 2 | 16 | 2015 |
| 17,5 | 32,1 | 0,6 | 8 | 2 | 19 | 2015 |
| 16,7 | 27,9 | 0,6 | 4 | 2 | 19 | 2001 |

|      |      |     |   |   |    |      |
|------|------|-----|---|---|----|------|
| 14,1 | 16,8 | 0,6 | 3 | 2 | 20 | 2007 |
| 14,1 | 16,8 | 0,6 | 4 | 2 | 21 | 2011 |
| 14,1 | 16,8 | 0,6 | 3 | 2 | 16 | 2015 |
| 13,3 | 14,1 | 0,6 | 4 | 2 | 25 | 2005 |
| 13,3 | 14,1 | 0,6 | 5 | 2 | 22 | 2007 |
| 13,3 | 14,1 | 0,6 | 2 | 2 | 19 | 2013 |
| 11,9 | 10,1 | 0,6 | 2 | 2 | 18 | 2007 |
| 13,9 | 16,1 | 0,6 | 4 | 2 | 23 | 2001 |
| 13,9 | 16,1 | 0,6 | 3 | 2 | 25 | 2003 |
| 15,7 | 23,2 | 0,6 | 3 | 2 | 24 | 2001 |
| 15,9 | 24,1 | 0,6 | 3 | 2 | 20 | 2001 |
| 15,4 | 21,9 | 0,6 | 3 | 2 | 18 | 2000 |
| 15,4 | 21,9 | 0,6 | 3 | 2 | 19 | 2002 |
| 15,4 | 21,9 | 0,6 | 3 | 2 | 19 | 2004 |
| 16,2 | 25,5 | 0,6 | 4 | 2 | 19 | 2002 |
| 12,6 | 12   | 0,6 | 2 | 2 | 19 | 2009 |
| 12,6 | 12   | 0,6 | 2 | 2 | 20 | 2013 |
| 17,1 | 30   | 0,6 | 5 | 2 | 19 | 2014 |
| 13,2 | 13,8 | 0,6 | 2 | 2 | 17 | 2002 |
| 13,2 | 13,8 | 0,6 | 2 | 2 | 19 | 2002 |
| 13,2 | 13,8 | 0,6 | 3 | 2 | 22 | 2007 |
| 13,2 | 13,8 | 0,6 | 2 | 2 | 21 | 2009 |
| 13,2 | 13,8 | 0,6 | 2 | 2 | 26 | 2009 |
| 13,2 | 13,8 | 0,6 | 2 | 2 | 19 | 2014 |
| 13,2 | 13,8 | 0,6 | 3 | 2 | 19 | 2014 |
| 12,2 | 10,9 | 0,6 | 2 | 2 | 22 | 2011 |
| 12,2 | 10,9 | 0,6 | 2 | 2 | 18 | 2014 |
| 14,5 | 18,3 | 0,6 | 5 | 2 | 22 | 2002 |

|      |      |     |    |   |    |      |
|------|------|-----|----|---|----|------|
| 14,5 | 18,3 | 0,6 | 3  | 2 | 21 | 2003 |
| 14,5 | 18,3 | 0,6 | 3  | 2 | 19 | 2008 |
| 13,6 | 15,1 | 0,6 | 3  | 2 | 17 | 2014 |
| 15,3 | 21,5 | 0,6 | 5  | 2 | 23 | 1999 |
| 15,3 | 21,5 | 0,6 | 4  | 2 | 25 | 2004 |
| 16,3 | 26   | 0,6 | 3  | 2 | 24 | 2001 |
| 16,3 | 26   | 0,6 | 3  | 2 | 20 | 2003 |
| 16,3 | 26   | 0,6 | 4  | 2 | 21 | 2003 |
| 19,2 | 42,5 | 0,6 | 7  | 2 | 17 | 2012 |
| 12,7 | 12,3 | 0,6 | 2  | 2 | 18 | 2014 |
| 13,1 | 13,5 | 0,6 | 2  | 2 | 21 | 2000 |
| 13,1 | 13,5 | 0,6 | 2  | 2 | 20 | 2002 |
| 15,6 | 22,8 | 0,6 | 4  | 2 | 20 | 2003 |
| 15,6 | 22,8 | 0,6 | 8  | 2 | 20 | 2008 |
| 16   | 24,6 | 0,6 | 8  | 2 | 20 | 2013 |
| 16   | 24,6 | 0,6 | 3  | 2 | 15 | 2015 |
| 17,3 | 31,1 | 0,6 | 4  | 2 | 19 | 2014 |
| 19   | 41,2 | 0,6 | 7  | 2 | 19 | 2014 |
| 14,2 | 17,2 | 0,6 | 5  | 2 | 26 | 1999 |
| 14,2 | 17,2 | 0,6 | 2  | 2 | 23 | 2001 |
| 14,2 | 17,2 | 0,6 | 4  | 2 | 22 | 2005 |
| 14,2 | 17,2 | 0,6 | 4  | 2 | 26 | 2006 |
| 14,2 | 17,2 | 0,6 | 3  | 2 | 23 | 2010 |
| 14,2 | 17,2 | 0,6 | 3  | 2 | 23 | 2010 |
| 14,2 | 17,2 | 0,6 | 3  | 2 | 21 | 2014 |
| 14,2 | 17,2 | 0,6 | 3  | 2 | 21 | 2015 |
| 11,4 | 8,9  | 0,6 | 2  | 2 | 25 | 2004 |
| 16,9 | 29   | 0,6 | 10 | 2 | 23 | 2007 |

|      |      |     |   |   |    |      |
|------|------|-----|---|---|----|------|
| 12,8 | 12,6 | 0,6 | 2 | 2 | 20 | 2001 |
| 13   | 13,2 | 0,6 | 2 | 2 | 22 | 1999 |
| 13   | 13,2 | 0,6 | 3 | 2 | 23 | 2008 |
| 13   | 13,2 | 0,6 | 2 | 2 | 23 | 2009 |
| 13   | 13,2 | 0,6 | 2 | 2 | 23 | 2011 |
| 13   | 13,2 | 0,6 | 2 | 2 | 18 | 2014 |
| 13   | 13,2 | 0,6 | 2 | 2 | 18 | 2014 |
| 15,2 | 21,1 | 0,6 | 4 | 2 | 25 | 2003 |
| 15,2 | 21,1 | 0,6 | 4 | 2 | 23 | 2004 |
| 15,2 | 21,1 | 0,6 | 5 | 2 | 23 | 2010 |
| 15,2 | 21,1 | 0,6 | 5 | 2 | 23 | 2010 |
| 15,2 | 21,1 | 0,6 | 5 | 2 | 17 | 2014 |
| 15,2 | 21,1 | 0,6 | 3 | 2 | 18 | 2015 |
| 15,2 | 21,1 | 0,6 | 3 | 2 | 21 | 2015 |
| 15,8 | 23,7 | 0,6 | 3 | 2 | 21 | 2003 |
| 15,8 | 23,7 | 0,6 | 4 | 2 | 25 | 2004 |
| 15,8 | 23,7 | 0,6 | 5 | 2 | 19 | 2012 |
| 14,6 | 18,7 | 0,6 | 5 | 2 | 19 | 2007 |
| 14,6 | 18,7 | 0,6 | 4 | 2 | 23 | 2009 |
| 11   | 8    | 0,6 | 2 | 2 | 20 | 2004 |
| 13,8 | 15,8 | 0,6 | 2 | 2 | 18 | 2000 |
| 13,8 | 15,8 | 0,6 | 2 | 2 | 21 | 2001 |
| 13,8 | 15,8 | 0,6 | 3 | 2 | 19 | 2014 |
| 13,8 | 15,8 | 0,6 | 2 | 2 | 21 | 2014 |
| 15,1 | 20,7 | 0,6 | 4 | 2 | 20 | 1999 |
| 15,1 | 20,7 | 0,6 | 4 | 2 | 25 | 2004 |
| 15,1 | 20,7 | 0,6 | 6 | 2 | 21 | 2005 |
| 15,1 | 20,7 | 0,6 | 4 | 2 | 19 | 2006 |

|      |      |     |   |   |    |      |
|------|------|-----|---|---|----|------|
| 15,1 | 20,7 | 0,6 | 4 | 2 | 23 | 2006 |
| 15,1 | 20,7 | 0,6 | 5 | 2 | 19 | 2012 |
| 14,7 | 19,1 | 0,6 | 3 | 2 | 20 | 2000 |
| 14,7 | 19,1 | 0,6 | 3 | 2 | 20 | 2003 |
| 14   | 16,5 | 0,6 | 4 | 2 | 20 | 1999 |
| 14   | 16,5 | 0,6 | 4 | 2 | 21 | 2005 |
| 14   | 16,5 | 0,6 | 2 | 2 | 22 | 2009 |
| 14   | 16,5 | 0,6 | 3 | 2 | 17 | 2014 |
| 14   | 16,5 | 0,6 | 3 | 2 | 15 | 2015 |
| 16,1 | 25,1 | 0,6 | 5 | 2 | 20 | 1999 |
| 15   | 20,3 | 0,6 | 3 | 2 | 19 | 2011 |
| 15   | 20,3 | 0,6 | 3 | 2 | 17 | 2012 |
| 15   | 20,3 | 0,6 | 3 | 2 | 18 | 2015 |
| 15   | 20,3 | 0,6 | 4 | 2 | 22 | 2015 |
| 14,8 | 19,5 | 0,6 | 2 | 2 | 21 | 2000 |
| 14,8 | 19,5 | 0,6 | 6 | 2 | 19 | 2011 |
| 15,5 | 22,4 | 0,6 | 5 | 2 | 21 | 2000 |
| 15,5 | 22,4 | 0,6 | 3 | 2 | 21 | 2001 |
| 13,5 | 14,8 | 0,6 | 4 | 2 | 23 | 2010 |
| 13,5 | 14,8 | 0,6 | 4 | 2 | 23 | 2010 |
| 13,5 | 14,8 | 0,6 | 3 | 2 | 21 | 2011 |
| 14,9 | 19,9 | 0,6 | 3 | 2 | 21 | 2000 |
| 14,9 | 19,9 | 0,6 | 5 | 2 | 24 | 2009 |
| 19,6 | 45,3 | 0,6 | 5 | 2 | 19 | 2010 |
| 19,6 | 45,3 | 0,6 | 5 | 2 | 19 | 2010 |
| 12   | 10,4 | 0,6 | 3 | 2 | 22 | 2005 |
| 12   | 10,4 | 0,6 | 1 | 2 | 24 | 2006 |
| 12   | 10,4 | 0,6 | 2 | 2 | 20 | 2012 |

|      |      |     |   |   |    |      |
|------|------|-----|---|---|----|------|
| 12   | 10,4 | 0,6 | 2 | 2 | 19 | 2014 |
| 12   | 10,4 | 0,6 | 2 | 2 | 19 | 2014 |
| 12,3 | 11,2 | 0,6 | 2 | 2 | 17 | 2014 |
| 12,3 | 11,2 | 0,6 | 2 | 2 | 19 | 2014 |
| 14,3 | 17,6 | 0,6 | 4 | 2 | 20 | 1999 |
| 14,3 | 17,6 | 0,6 | 6 | 2 | 21 | 2013 |
| 14,3 | 17,6 | 0,6 | 3 | 2 | 19 | 2014 |
| 15,9 | 24,2 | 0,6 | 5 | 2 | 20 | 1999 |
| 15,7 | 23,3 | 0,6 | 7 | 2 | 23 | 2009 |
| 15,7 | 23,3 | 0,6 | 4 | 2 | 21 | 2015 |
| 11,6 | 9,4  | 0,6 | 2 | 2 | 23 | 2007 |
| 17,7 | 33,4 | 0,6 | 5 | 2 | 19 | 2010 |
| 17,7 | 33,4 | 0,6 | 5 | 2 | 19 | 2010 |
| 15,4 | 22   | 0,6 | 6 | 2 | 21 | 1999 |
| 15,4 | 22   | 0,6 | 3 | 2 | 22 | 2001 |
| 15,4 | 22   | 0,6 | 3 | 2 | 21 | 2003 |
| 15,4 | 22   | 0,6 | 4 | 2 | 23 | 2007 |
| 15,4 | 22   | 0,6 | 4 | 2 | 16 | 2015 |
| 15,4 | 22   | 0,6 | 4 | 2 | 16 | 2015 |
| 13,4 | 14,5 | 0,6 | 2 | 2 | 22 | 2001 |
| 13,4 | 14,5 | 0,6 | 2 | 2 | 20 | 2006 |
| 13,4 | 14,5 | 0,6 | 3 | 2 | 25 | 2008 |
| 13,4 | 14,5 | 0,6 | 2 | 2 | 18 | 2014 |
| 16,3 | 26,1 | 0,6 | 3 | 2 | 18 | 2015 |
| 13,7 | 15,5 | 0,6 | 2 | 2 | 24 | 2001 |
| 13,7 | 15,5 | 0,6 | 3 | 2 | 15 | 2015 |
| 14,4 | 18   | 0,6 | 3 | 2 | 24 | 2002 |
| 14,4 | 18   | 0,6 | 3 | 2 | 17 | 2008 |

|      |      |     |   |   |    |      |
|------|------|-----|---|---|----|------|
| 14,4 | 18   | 0,6 | 4 | 2 | 19 | 2009 |
| 14,1 | 16,9 | 0,6 | 2 | 2 | 17 | 2002 |
| 14,1 | 16,9 | 0,6 | 2 | 2 | 25 | 2003 |
| 14,1 | 16,9 | 0,6 | 3 | 2 | 18 | 2014 |
| 16   | 24,7 | 0,6 | 6 | 2 | 26 | 2000 |
| 16   | 24,7 | 0,6 | 6 | 2 | 23 | 2011 |
| 15,3 | 21,6 | 0,6 | 7 | 2 | 26 | 1999 |
| 15,3 | 21,6 | 0,6 | 4 | 2 | 20 | 2009 |
| 15,3 | 21,6 | 0,6 | 3 | 2 | 15 | 2015 |
| 15,6 | 22,9 | 0,6 | 5 | 2 | 22 | 2000 |
| 15,6 | 22,9 | 0,6 | 3 | 2 | 18 | 2015 |
| 13,9 | 16,2 | 0,6 | 3 | 2 | 21 | 2006 |
| 10,8 | 7,6  | 0,6 | 1 | 2 | 18 | 2007 |
| 16,7 | 28,1 | 0,6 | 3 | 2 | 22 | 2003 |
| 14,5 | 18,4 | 0,6 | 3 | 2 | 20 | 2000 |
| 14,5 | 18,4 | 0,6 | 4 | 2 | 22 | 2005 |
| 14,5 | 18,4 | 0,6 | 4 | 2 | 22 | 2005 |
| 13,3 | 14,2 | 0,6 | 3 | 2 | 20 | 2007 |
| 13,3 | 14,2 | 0,6 | 3 | 2 | 20 | 2008 |
| 15,2 | 21,2 | 0,6 | 4 | 2 | 19 | 2002 |
| 15,2 | 21,2 | 0,6 | 4 | 2 | 22 | 2004 |
| 15,2 | 21,2 | 0,6 | 5 | 2 | 20 | 2007 |
| 15,2 | 21,2 | 0,6 | 6 | 2 | 20 | 2011 |
| 15,2 | 21,2 | 0,6 | 3 | 2 | 15 | 2015 |
| 17,1 | 30,2 | 0,6 | 8 | 2 | 17 | 2009 |
| 12,1 | 10,7 | 0,6 | 4 | 2 | 20 | 2006 |
| 12,1 | 10,7 | 0,6 | 2 | 2 | 25 | 2007 |
| 10,7 | 7,4  | 0,6 | 2 | 2 | 23 | 2004 |

|      |      |     |   |   |    |      |
|------|------|-----|---|---|----|------|
| 14,6 | 18,8 | 0,6 | 2 | 2 | 19 | 1999 |
| 14,6 | 18,8 | 0,6 | 6 | 2 | 21 | 2006 |
| 14,6 | 18,8 | 0,6 | 3 | 2 | 20 | 2008 |
| 15,1 | 20,8 | 0,6 | 6 | 2 | 24 | 2006 |
| 15,1 | 20,8 | 0,6 | 5 | 2 | 26 | 2006 |
| 12,5 | 11,8 | 0,6 | 2 | 2 | 22 | 2011 |
| 12,5 | 11,8 | 0,6 | 2 | 2 | 19 | 2013 |
| 14,2 | 17,3 | 0,6 | 3 | 2 | 22 | 2003 |
| 14,2 | 17,3 | 0,6 | 3 | 2 | 19 | 2005 |
| 14,2 | 17,3 | 0,6 | 3 | 2 | 17 | 2008 |
| 14,2 | 17,3 | 0,6 | 6 | 2 | 20 | 2008 |
| 14,2 | 17,3 | 0,6 | 4 | 2 | 20 | 2008 |
| 14,2 | 17,3 | 0,6 | 2 | 2 | 20 | 2008 |
| 15,5 | 22,5 | 0,6 | 4 | 2 | 17 | 2009 |
| 13,6 | 15,2 | 0,6 | 3 | 2 | 21 | 2005 |
| 13,6 | 15,2 | 0,6 | 3 | 2 | 21 | 2011 |
| 18,9 | 40,8 | 0,6 | 5 | 2 | 20 | 2012 |
| 13,2 | 13,9 | 0,6 | 3 | 2 | 20 | 2007 |
| 13,2 | 13,9 | 0,6 | 2 | 2 | 23 | 2009 |
| 13,2 | 13,9 | 0,6 | 2 | 2 | 21 | 2013 |
| 14,7 | 19,2 | 0,6 | 2 | 2 | 21 | 2000 |
| 14,7 | 19,2 | 0,6 | 3 | 2 | 19 | 2001 |
| 14,7 | 19,2 | 0,6 | 3 | 2 | 19 | 2001 |
| 14,7 | 19,2 | 0,6 | 3 | 2 | 18 | 2015 |
| 15   | 20,4 | 0,6 | 4 | 2 | 21 | 2001 |
| 15   | 20,4 | 0,6 | 3 | 2 | 23 | 2003 |
| 15   | 20,4 | 0,6 | 4 | 2 | 17 | 2009 |
| 15   | 20,4 | 0,6 | 3 | 2 | 19 | 2012 |

|      |      |     |   |   |    |      |
|------|------|-----|---|---|----|------|
| 16,2 | 25,7 | 0,6 | 4 | 2 | 21 | 2001 |
| 17   | 29,7 | 0,6 | 3 | 2 | 16 | 2015 |
| 14,8 | 19,6 | 0,6 | 5 | 2 | 19 | 2009 |
| 14,9 | 20   | 0,6 | 3 | 2 | 20 | 2003 |
| 14,9 | 20   | 0,6 | 3 | 2 | 17 | 2012 |
| 15,7 | 23,4 | 0,6 | 4 | 2 | 18 | 2000 |
| 11,5 | 9,2  | 0,6 | 2 | 2 | 23 | 2011 |
| 16,9 | 29,2 | 0,6 | 5 | 2 | 19 | 2014 |
| 14   | 16,6 | 0,6 | 4 | 2 | 22 | 1999 |
| 14   | 16,6 | 0,6 | 2 | 2 | 20 | 2000 |
| 14   | 16,6 | 0,6 | 4 | 2 | 25 | 2005 |
| 14   | 16,6 | 0,6 | 4 | 2 | 19 | 2006 |
| 14   | 16,6 | 0,6 | 3 | 2 | 20 | 2011 |
| 14   | 16,6 | 0,6 | 2 | 2 | 21 | 2012 |
| 14   | 16,6 | 0,6 | 2 | 2 | 19 | 2013 |
| 14   | 16,6 | 0,6 | 3 | 2 | 15 | 2015 |
| 13,1 | 13,6 | 0,6 | 3 | 2 | 20 | 2007 |
| 13,1 | 13,6 | 0,6 | 2 | 2 | 26 | 2009 |
| 16,3 | 26,2 | 0,6 | 6 | 2 | 18 | 2000 |
| 13,8 | 15,9 | 0,6 | 4 | 2 | 20 | 2011 |
| 13,8 | 15,9 | 0,6 | 3 | 2 | 19 | 2012 |
| 11,9 | 10,2 | 0,6 | 2 | 2 | 26 | 2006 |
| 14,3 | 17,7 | 0,6 | 3 | 2 | 20 | 2002 |
| 14,3 | 17,7 | 0,6 | 4 | 2 | 20 | 2012 |
| 13   | 13,3 | 0,6 | 2 | 2 | 23 | 2007 |
| 13   | 13,3 | 0,6 | 2 | 2 | 19 | 2013 |
| 13   | 13,3 | 0,6 | 2 | 2 | 19 | 2013 |
| 13   | 13,3 | 0,6 | 2 | 2 | 19 | 2014 |

|      |      |     |    |   |    |      |
|------|------|-----|----|---|----|------|
| 13   | 13,3 | 0,6 | 2  | 2 | 21 | 2014 |
| 13   | 13,3 | 0,6 | 3  | 2 | 21 | 2015 |
| 16   | 24,8 | 0,6 | 5  | 2 | 19 | 2010 |
| 16   | 24,8 | 0,6 | 5  | 2 | 19 | 2010 |
| 16   | 24,8 | 0,6 | 3  | 2 | 18 | 2015 |
| 16,5 | 27,2 | 0,6 | 4  | 2 | 18 | 2002 |
| 12,8 | 12,7 | 0,6 | 3  | 2 | 22 | 2005 |
| 13,5 | 14,9 | 0,6 | 2  | 2 | 20 | 2006 |
| 13,5 | 14,9 | 0,6 | 2  | 2 | 19 | 2010 |
| 13,5 | 14,9 | 0,6 | 2  | 2 | 19 | 2010 |
| 13,5 | 14,9 | 0,6 | 3  | 2 | 19 | 2013 |
| 11,7 | 9,7  | 0,6 | 1  | 2 | 26 | 2001 |
| 12,2 | 11   | 0,6 | 4  | 2 | 26 | 2006 |
| 12,2 | 11   | 0,6 | 2  | 2 | 18 | 2007 |
| 15,6 | 23   | 0,6 | 3  | 2 | 21 | 2000 |
| 15,6 | 23   | 0,6 | 3  | 2 | 20 | 2003 |
| 15,6 | 23   | 0,6 | 7  | 2 | 19 | 2012 |
| 15,6 | 23   | 0,6 | 5  | 2 | 19 | 2013 |
| 15,3 | 21,7 | 0,6 | 5  | 2 | 19 | 1999 |
| 15,3 | 21,7 | 0,6 | 3  | 2 | 26 | 2003 |
| 15,3 | 21,7 | 0,6 | 4  | 2 | 20 | 2006 |
| 15,3 | 21,7 | 0,6 | 10 | 2 | 19 | 2009 |
| 15,3 | 21,7 | 0,6 | 3  | 2 | 21 | 2010 |
| 15,3 | 21,7 | 0,6 | 3  | 2 | 21 | 2010 |
| 18,6 | 39   | 0,6 | 5  | 2 | 20 | 2010 |
| 18,6 | 39   | 0,6 | 5  | 2 | 20 | 2010 |
| 14,4 | 18,1 | 0,6 | 3  | 2 | 26 | 2003 |
| 14,4 | 18,1 | 0,6 | 3  | 2 | 16 | 2008 |

|      |      |     |   |   |    |      |
|------|------|-----|---|---|----|------|
| 16,1 | 25,3 | 0,6 | 4 | 2 | 17 | 2012 |
| 20,6 | 53   | 0,6 | 5 | 2 | 17 | 2012 |
| 14,1 | 17   | 0,6 | 2 | 2 | 20 | 2000 |
| 14,1 | 17   | 0,6 | 3 | 2 | 20 | 2001 |
| 14,1 | 17   | 0,6 | 2 | 2 | 21 | 2001 |
| 14,1 | 17   | 0,6 | 4 | 2 | 21 | 2001 |
| 14,1 | 17   | 0,6 | 2 | 2 | 23 | 2003 |
| 14,1 | 17   | 0,6 | 3 | 2 | 21 | 2014 |
| 15,2 | 21,3 | 0,6 | 3 | 2 | 17 | 2014 |
| 15,2 | 21,3 | 0,6 | 4 | 2 | 17 | 2014 |
| 15,2 | 21,3 | 0,6 | 3 | 2 | 18 | 2015 |
| 15,2 | 21,3 | 0,6 | 3 | 2 | 19 | 2015 |
| 17   | 29,8 | 0,6 | 4 | 2 | 16 | 2008 |
| 13,4 | 14,6 | 0,6 | 2 | 2 | 18 | 2014 |
| 14,5 | 18,5 | 0,6 | 3 | 2 | 23 | 2001 |
| 14,5 | 18,5 | 0,6 | 4 | 2 | 23 | 2011 |
| 15,5 | 22,6 | 0,6 | 3 | 2 | 22 | 2003 |
| 15,5 | 22,6 | 0,6 | 3 | 2 | 22 | 2003 |
| 13,9 | 16,3 | 0,6 | 3 | 2 | 25 | 2007 |
| 16,9 | 29,3 | 0,6 | 4 | 2 | 17 | 2008 |
| 12,3 | 11,3 | 0,6 | 2 | 2 | 26 | 2006 |
| 12,3 | 11,3 | 0,6 | 3 | 2 | 21 | 2011 |
| 12,3 | 11,3 | 0,6 | 2 | 2 | 20 | 2013 |
| 16,3 | 26,3 | 0,6 | 4 | 2 | 19 | 2002 |
| 16,3 | 26,3 | 0,6 | 4 | 2 | 20 | 2013 |
| 14,6 | 18,9 | 0,6 | 3 | 2 | 16 | 2015 |
| 16,8 | 28,8 | 0,6 | 9 | 2 | 21 | 2000 |
| 16,8 | 28,8 | 0,6 | 7 | 2 | 21 | 2014 |

|      |      |     |    |   |    |      |
|------|------|-----|----|---|----|------|
| 15   | 20,5 | 0,6 | 3  | 2 | 22 | 2003 |
| 15   | 20,5 | 0,6 | 4  | 2 | 25 | 2004 |
| 15   | 20,5 | 0,6 | 4  | 2 | 20 | 2011 |
| 15   | 20,5 | 0,6 | 3  | 2 | 17 | 2014 |
| 15   | 20,5 | 0,6 | 4  | 2 | 21 | 2015 |
| 11,4 | 9    | 0,6 | 2  | 2 | 20 | 2004 |
| 11,4 | 9    | 0,6 | 2  | 2 | 20 | 2004 |
| 11,4 | 9    | 0,6 | 2  | 2 | 25 | 2004 |
| 20   | 48,6 | 0,6 | 10 | 2 | 18 | 2012 |
| 16,4 | 26,8 | 0,6 | 4  | 2 | 21 | 2012 |
| 14,7 | 19,3 | 0,6 | 4  | 2 | 21 | 1999 |
| 14,7 | 19,3 | 0,6 | 4  | 2 | 23 | 2003 |
| 14,7 | 19,3 | 0,6 | 3  | 2 | 22 | 2009 |
| 14,7 | 19,3 | 0,6 | 3  | 2 | 20 | 2013 |
| 14,7 | 19,3 | 0,6 | 3  | 2 | 18 | 2014 |
| 14,7 | 19,3 | 0,6 | 3  | 2 | 18 | 2015 |
| 16,7 | 28,3 | 0,6 | 3  | 2 | 18 | 2000 |
| 16,7 | 28,3 | 0,6 | 7  | 2 | 17 | 2014 |
| 14,9 | 20,1 | 0,6 | 3  | 2 | 19 | 2012 |
| 12   | 10,5 | 0,6 | 2  | 2 | 23 | 2007 |
| 12   | 10,5 | 0,6 | 2  | 2 | 20 | 2013 |
| 14,8 | 19,7 | 0,6 | 3  | 2 | 21 | 2001 |
| 14,8 | 19,7 | 0,6 | 5  | 2 | 19 | 2008 |
| 14,8 | 19,7 | 0,6 | 4  | 2 | 23 | 2010 |
| 14,8 | 19,7 | 0,6 | 4  | 2 | 23 | 2010 |
| 14,2 | 17,4 | 0,6 | 2  | 2 | 21 | 2001 |
| 14,2 | 17,4 | 0,6 | 4  | 2 | 23 | 2009 |
| 16,6 | 27,8 | 0,6 | 6  | 2 | 20 | 2001 |

|      |      |     |   |   |    |      |
|------|------|-----|---|---|----|------|
| 13,3 | 14,3 | 0,6 | 2 | 2 | 19 | 2002 |
| 13,3 | 14,3 | 0,6 | 2 | 2 | 23 | 2009 |
| 13,3 | 14,3 | 0,6 | 2 | 2 | 18 | 2014 |
| 15,4 | 22,2 | 0,6 | 3 | 2 | 19 | 2013 |
| 16   | 24,9 | 0,6 | 5 | 2 | 19 | 2000 |
| 16   | 24,9 | 0,6 | 3 | 2 | 19 | 2012 |
| 17,1 | 30,4 | 0,6 | 3 | 2 | 16 | 2015 |
| 13,6 | 15,3 | 0,6 | 4 | 2 | 25 | 1999 |
| 13,6 | 15,3 | 0,6 | 2 | 2 | 17 | 2014 |
| 15,8 | 24   | 0,6 | 3 | 2 | 19 | 2000 |
| 15,8 | 24   | 0,6 | 4 | 2 | 18 | 2001 |
| 15,8 | 24   | 0,6 | 7 | 2 | 21 | 2006 |
| 14   | 16,7 | 0,6 | 2 | 2 | 24 | 2001 |
| 14   | 16,7 | 0,6 | 2 | 2 | 24 | 2006 |
| 14   | 16,7 | 0,6 | 3 | 2 | 22 | 2009 |
| 14   | 16,7 | 0,6 | 4 | 2 | 22 | 2009 |
| 14   | 16,7 | 0,6 | 4 | 2 | 22 | 2011 |
| 14   | 16,7 | 0,6 | 2 | 2 | 17 | 2014 |
| 11,8 | 10   | 0,6 | 2 | 2 | 19 | 2013 |
| 16,1 | 25,4 | 0,6 | 4 | 2 | 25 | 1999 |
| 16,1 | 25,4 | 0,6 | 3 | 2 | 22 | 2003 |
| 16,1 | 25,4 | 0,6 | 6 | 2 | 21 | 2011 |
| 16,1 | 25,4 | 0,6 | 4 | 2 | 17 | 2012 |
| 16,1 | 25,4 | 0,6 | 4 | 2 | 18 | 2012 |
| 15,3 | 21,8 | 0,6 | 3 | 2 | 20 | 2000 |
| 15,3 | 21,8 | 0,6 | 2 | 2 | 24 | 2002 |
| 15,3 | 21,8 | 0,6 | 4 | 2 | 22 | 2004 |
| 15,3 | 21,8 | 0,6 | 6 | 2 | 19 | 2006 |

|      |      |     |   |   |    |      |
|------|------|-----|---|---|----|------|
| 15,3 | 21,8 | 0,6 | 3 | 2 | 16 | 2008 |
| 15,3 | 21,8 | 0,6 | 4 | 2 | 18 | 2008 |
| 15,3 | 21,8 | 0,6 | 6 | 2 | 19 | 2013 |
| 13,2 | 14   | 0,6 | 2 | 2 | 18 | 2002 |
| 13,2 | 14   | 0,6 | 2 | 2 | 23 | 2003 |
| 13,2 | 14   | 0,6 | 4 | 2 | 26 | 2009 |
| 13,2 | 14   | 0,6 | 2 | 2 | 19 | 2014 |
| 14,3 | 17,8 | 0,6 | 2 | 2 | 26 | 2001 |
| 14,3 | 17,8 | 0,6 | 2 | 2 | 24 | 2006 |
| 14,3 | 17,8 | 0,6 | 3 | 2 | 20 | 2008 |
| 13,8 | 16   | 0,6 | 2 | 2 | 18 | 2000 |
| 16,9 | 29,4 | 0,6 | 7 | 2 | 18 | 2001 |
| 16,2 | 25,9 | 0,6 | 8 | 2 | 26 | 2005 |
| 16,2 | 25,9 | 0,6 | 6 | 2 | 20 | 2013 |
| 17,2 | 31   | 0,6 | 5 | 2 | 17 | 2014 |
| 12,5 | 11,9 | 0,6 | 3 | 2 | 22 | 2005 |
| 12,5 | 11,9 | 0,6 | 2 | 2 | 20 | 2010 |
| 12,5 | 11,9 | 0,6 | 2 | 2 | 20 | 2010 |
| 15,2 | 21,4 | 0,6 | 6 | 2 | 18 | 2000 |
| 15,2 | 21,4 | 0,6 | 3 | 2 | 17 | 2002 |
| 15,2 | 21,4 | 0,6 | 3 | 2 | 21 | 2003 |
| 15,2 | 21,4 | 0,6 | 6 | 2 | 22 | 2007 |
| 15,2 | 21,4 | 0,6 | 3 | 2 | 22 | 2007 |
| 14,4 | 18,2 | 0,6 | 2 | 2 | 19 | 2000 |
| 14,4 | 18,2 | 0,6 | 3 | 2 | 21 | 2001 |
| 14,4 | 18,2 | 0,6 | 5 | 2 | 23 | 2009 |
| 14,4 | 18,2 | 0,6 | 4 | 2 | 20 | 2011 |
| 14,4 | 18,2 | 0,6 | 3 | 2 | 20 | 2013 |

|      |      |     |   |   |    |      |
|------|------|-----|---|---|----|------|
| 15,5 | 22,7 | 0,6 | 4 | 2 | 18 | 2014 |
| 16,3 | 26,4 | 0,6 | 7 | 2 | 19 | 2012 |
| 12,1 | 10,8 | 0,6 | 2 | 2 | 23 | 2006 |
| 12,1 | 10,8 | 0,6 | 2 | 2 | 21 | 2011 |
| 12,1 | 10,8 | 0,6 | 2 | 2 | 22 | 2011 |
| 15,7 | 23,6 | 0,6 | 4 | 2 | 20 | 2011 |
| 15,7 | 23,6 | 0,6 | 3 | 2 | 19 | 2014 |
| 11,3 | 8,8  | 0,6 | 2 | 2 | 24 | 2006 |
| 13   | 13,4 | 0,6 | 2 | 2 | 22 | 2001 |
| 13   | 13,4 | 0,6 | 2 | 2 | 19 | 2002 |
| 13   | 13,4 | 0,6 | 2 | 2 | 21 | 2006 |
| 13   | 13,4 | 0,6 | 2 | 2 | 21 | 2008 |
| 13   | 13,4 | 0,6 | 2 | 2 | 21 | 2008 |
| 13   | 13,4 | 0,6 | 2 | 2 | 22 | 2011 |
| 13   | 13,4 | 0,6 | 2 | 2 | 19 | 2013 |
| 13   | 13,4 | 0,6 | 2 | 2 | 19 | 2013 |
| 13   | 13,4 | 0,6 | 2 | 2 | 19 | 2014 |
| 15,1 | 21   | 0,6 | 3 | 2 | 24 | 2002 |
| 15,1 | 21   | 0,6 | 3 | 2 | 21 | 2003 |
| 16,5 | 27,4 | 0,6 | 5 | 2 | 20 | 1999 |
| 16,5 | 27,4 | 0,6 | 9 | 2 | 22 | 2003 |
| 14,1 | 17,1 | 0,6 | 6 | 2 | 22 | 2003 |
| 14,1 | 17,1 | 0,6 | 4 | 2 | 21 | 2005 |
| 14,1 | 17,1 | 0,6 | 3 | 2 | 19 | 2014 |
| 14,5 | 18,6 | 0,6 | 5 | 2 | 23 | 1999 |
| 14,5 | 18,6 | 0,6 | 4 | 2 | 25 | 2004 |
| 14,5 | 18,6 | 0,6 | 3 | 2 | 18 | 2008 |
| 12,7 | 12,5 | 0,6 | 2 | 2 | 18 | 2002 |

|      |      |     |   |   |    |      |
|------|------|-----|---|---|----|------|
| 12,9 | 13,1 | 0,6 | 2 | 2 | 23 | 2001 |
| 12,9 | 13,1 | 0,6 | 3 | 2 | 18 | 2014 |
| 18,3 | 37,4 | 0,6 | 4 | 2 | 16 | 2015 |
| 18,3 | 37,4 | 0,6 | 6 | 2 | 18 | 2015 |
| 12,8 | 12,8 | 0,6 | 5 | 2 | 25 | 1999 |
| 12,8 | 12,8 | 0,6 | 2 | 2 | 20 | 2004 |
| 12,8 | 12,8 | 0,6 | 2 | 2 | 23 | 2006 |
| 12,8 | 12,8 | 0,6 | 2 | 2 | 19 | 2013 |
| 12,8 | 12,8 | 0,6 | 2 | 2 | 21 | 2013 |
| 16   | 25   | 0,6 | 7 | 2 | 23 | 2002 |
| 16   | 25   | 0,6 | 4 | 2 | 20 | 2003 |
| 15   | 20,6 | 0,6 | 5 | 2 | 19 | 1999 |
| 15   | 20,6 | 0,6 | 3 | 2 | 20 | 2003 |
| 15   | 20,6 | 0,6 | 6 | 2 | 25 | 2004 |
| 15   | 20,6 | 0,6 | 3 | 2 | 20 | 2006 |
| 15   | 20,6 | 0,6 | 7 | 2 | 19 | 2007 |
| 15   | 20,6 | 0,6 | 3 | 2 | 19 | 2007 |
| 15   | 20,6 | 0,6 | 5 | 2 | 22 | 2007 |
| 15   | 20,6 | 0,6 | 4 | 2 | 23 | 2010 |
| 15   | 20,6 | 0,6 | 4 | 2 | 23 | 2010 |
| 15   | 20,6 | 0,6 | 4 | 2 | 18 | 2014 |
| 14,6 | 19   | 0,6 | 4 | 2 | 19 | 2009 |
| 14,6 | 19   | 0,6 | 3 | 2 | 16 | 2015 |
| 13,7 | 15,7 | 0,6 | 3 | 2 | 22 | 2001 |
| 13,7 | 15,7 | 0,6 | 2 | 2 | 23 | 2003 |
| 13,7 | 15,7 | 0,6 | 3 | 2 | 25 | 2004 |
| 13,7 | 15,7 | 0,6 | 2 | 2 | 24 | 2009 |
| 13,7 | 15,7 | 0,6 | 3 | 2 | 23 | 2010 |

|      |      |     |   |   |    |      |
|------|------|-----|---|---|----|------|
| 13,7 | 15,7 | 0,6 | 3 | 2 | 23 | 2010 |
| 15,4 | 22,3 | 0,6 | 5 | 2 | 21 | 1999 |
| 17   | 30   | 0,6 | 4 | 2 | 17 | 2012 |
| 14,9 | 20,2 | 0,6 | 3 | 2 | 21 | 2001 |
| 14,9 | 20,2 | 0,6 | 3 | 2 | 25 | 2003 |
| 13,9 | 16,4 | 0,6 | 3 | 2 | 20 | 2011 |
| 14,7 | 19,4 | 0,6 | 6 | 2 | 24 | 2001 |
| 14,7 | 19,4 | 0,6 | 3 | 2 | 20 | 2003 |
| 19   | 41,9 | 0,6 | 5 | 2 | 18 | 2012 |
| 13,4 | 14,7 | 0,6 | 2 | 2 | 23 | 2006 |
| 16,1 | 25,5 | 0,6 | 4 | 2 | 19 | 2013 |
| 15,6 | 23,2 | 0,6 | 3 | 2 | 22 | 2015 |
| 14,2 | 17,5 | 0,6 | 2 | 2 | 19 | 2000 |
| 14,2 | 17,5 | 0,6 | 5 | 2 | 18 | 2007 |
| 14,2 | 17,5 | 0,6 | 3 | 2 | 17 | 2008 |
| 14,2 | 17,5 | 0,6 | 4 | 2 | 21 | 2011 |
| 14,2 | 17,5 | 0,6 | 3 | 2 | 21 | 2011 |
| 14,2 | 17,5 | 0,6 | 3 | 2 | 19 | 2012 |
| 14,2 | 17,5 | 0,6 | 3 | 2 | 18 | 2014 |
| 14,2 | 17,5 | 0,6 | 3 | 2 | 15 | 2015 |
| 17,2 | 31,1 | 0,6 | 4 | 2 | 21 | 2015 |
| 12,2 | 11,1 | 0,6 | 2 | 2 | 22 | 2005 |
| 12,2 | 11,1 | 0,6 | 2 | 2 | 18 | 2014 |
| 15,3 | 21,9 | 0,6 | 7 | 2 | 24 | 2001 |
| 15,3 | 21,9 | 0,6 | 6 | 2 | 19 | 2008 |
| 15,3 | 21,9 | 0,6 | 6 | 2 | 21 | 2008 |
| 15,3 | 21,9 | 0,6 | 3 | 2 | 26 | 2009 |
| 16,2 | 26   | 0,6 | 4 | 2 | 17 | 2002 |

|      |      |     |   |   |    |      |
|------|------|-----|---|---|----|------|
| 16,2 | 26   | 0,6 | 4 | 2 | 19 | 2013 |
| 19,2 | 43,3 | 0,6 | 4 | 2 | 19 | 2013 |
| 13,3 | 14,4 | 0,6 | 2 | 2 | 20 | 1999 |
| 13,3 | 14,4 | 0,6 | 2 | 2 | 19 | 2002 |
| 13,3 | 14,4 | 0,6 | 3 | 2 | 23 | 2010 |
| 13,3 | 14,4 | 0,6 | 3 | 2 | 23 | 2010 |
| 13,3 | 14,4 | 0,6 | 2 | 2 | 19 | 2013 |
| 14,3 | 17,9 | 0,6 | 3 | 2 | 21 | 2000 |
| 14,3 | 17,9 | 0,6 | 4 | 2 | 22 | 2009 |
| 14,3 | 17,9 | 0,6 | 3 | 2 | 19 | 2012 |
| 19,4 | 44,7 | 0,6 | 6 | 2 | 15 | 2015 |
| 13,6 | 15,4 | 0,6 | 3 | 2 | 19 | 2013 |
| 15,2 | 21,5 | 0,6 | 7 | 2 | 22 | 2009 |
| 15,2 | 21,5 | 0,6 | 4 | 2 | 20 | 2013 |
| 17,3 | 31,7 | 0,6 | 8 | 2 | 21 | 2010 |
| 17,3 | 31,7 | 0,6 | 8 | 2 | 21 | 2010 |
| 14   | 16,8 | 0,6 | 2 | 2 | 24 | 2001 |
| 14   | 16,8 | 0,6 | 3 | 2 | 23 | 2003 |
| 14   | 16,8 | 0,6 | 2 | 2 | 19 | 2013 |
| 14   | 16,8 | 0,6 | 3 | 2 | 18 | 2014 |
| 15,5 | 22,8 | 0,6 | 3 | 2 | 19 | 2001 |
| 15,7 | 23,7 | 0,6 | 4 | 2 | 23 | 2015 |
| 13,8 | 16,1 | 0,6 | 3 | 2 | 22 | 2002 |
| 13,8 | 16,1 | 0,6 | 2 | 2 | 22 | 2011 |
| 13,8 | 16,1 | 0,6 | 2 | 2 | 19 | 2013 |
| 12,3 | 11,4 | 0,6 | 2 | 2 | 19 | 2014 |
| 17   | 30,1 | 0,6 | 6 | 2 | 19 | 2011 |
| 16   | 25,1 | 0,6 | 7 | 2 | 22 | 2004 |

|      |      |     |   |   |    |      |
|------|------|-----|---|---|----|------|
| 16   | 25,1 | 0,6 | 4 | 2 | 18 | 2014 |
| 15,1 | 21,1 | 0,6 | 3 | 2 | 17 | 2008 |
| 14,4 | 18,3 | 0,6 | 2 | 2 | 22 | 2009 |
| 14,4 | 18,3 | 0,6 | 4 | 2 | 22 | 2011 |
| 13,2 | 14,1 | 0,6 | 2 | 2 | 21 | 2001 |
| 13,2 | 14,1 | 0,6 | 2 | 2 | 19 | 2002 |
| 13,2 | 14,1 | 0,6 | 2 | 2 | 21 | 2005 |
| 13,2 | 14,1 | 0,6 | 2 | 2 | 19 | 2006 |
| 13,2 | 14,1 | 0,6 | 4 | 2 | 21 | 2008 |
| 13,2 | 14,1 | 0,6 | 2 | 2 | 19 | 2012 |
| 13,2 | 14,1 | 0,6 | 2 | 2 | 17 | 2014 |
| 17,7 | 34   | 0,6 | 5 | 2 | 19 | 2010 |
| 17,7 | 34   | 0,6 | 5 | 2 | 19 | 2010 |
| 18,9 | 41,4 | 0,6 | 6 | 2 | 17 | 2014 |
| 15,4 | 22,4 | 0,6 | 3 | 2 | 21 | 2001 |
| 15,4 | 22,4 | 0,6 | 3 | 2 | 22 | 2001 |
| 15,4 | 22,4 | 0,6 | 3 | 2 | 21 | 2003 |
| 15   | 20,7 | 0,6 | 4 | 2 | 26 | 2006 |
| 15   | 20,7 | 0,6 | 3 | 2 | 20 | 2007 |
| 15   | 20,7 | 0,6 | 5 | 2 | 19 | 2012 |
| 15   | 20,7 | 0,6 | 3 | 2 | 19 | 2012 |
| 15   | 20,7 | 0,6 | 5 | 2 | 21 | 2014 |
| 14,5 | 18,7 | 0,6 | 3 | 2 | 17 | 2008 |
| 10,4 | 6,9  | 0,6 | 2 | 2 | 20 | 2004 |
| 10,4 | 6,9  | 0,6 | 1 | 2 | 26 | 2009 |
| 12   | 10,6 | 0,6 | 2 | 2 | 25 | 2003 |
| 12   | 10,6 | 0,6 | 2 | 2 | 21 | 2006 |
| 12   | 10,6 | 0,6 | 2 | 2 | 21 | 2006 |

|      |      |     |   |   |    |      |
|------|------|-----|---|---|----|------|
| 12   | 10,6 | 0,6 | 2 | 2 | 20 | 2007 |
| 12   | 10,6 | 0,6 | 2 | 2 | 21 | 2013 |
| 16,1 | 25,6 | 0,6 | 5 | 2 | 17 | 2012 |
| 16,1 | 25,6 | 0,6 | 4 | 2 | 18 | 2012 |
| 17,8 | 34,6 | 0,6 | 6 | 2 | 18 | 2002 |
| 15,8 | 24,2 | 0,6 | 4 | 2 | 22 | 2003 |
| 15,8 | 24,2 | 0,6 | 3 | 2 | 21 | 2015 |
| 14,1 | 17,2 | 0,6 | 2 | 2 | 26 | 2000 |
| 14,1 | 17,2 | 0,6 | 5 | 2 | 19 | 2002 |
| 14,1 | 17,2 | 0,6 | 3 | 2 | 19 | 2007 |
| 14,1 | 17,2 | 0,6 | 6 | 2 | 17 | 2008 |
| 14,1 | 17,2 | 0,6 | 4 | 2 | 23 | 2008 |
| 14,1 | 17,2 | 0,6 | 3 | 2 | 23 | 2008 |
| 14,1 | 17,2 | 0,6 | 3 | 2 | 18 | 2015 |
| 16,8 | 29,1 | 0,6 | 4 | 2 | 19 | 2011 |
| 14,6 | 19,1 | 0,6 | 3 | 2 | 25 | 2004 |
| 14,6 | 19,1 | 0,6 | 3 | 2 | 22 | 2011 |
| 14,6 | 19,1 | 0,6 | 3 | 2 | 21 | 2015 |
| 13,5 | 15,1 | 0,6 | 2 | 2 | 23 | 1999 |
| 13,5 | 15,1 | 0,6 | 3 | 2 | 22 | 2000 |
| 13,5 | 15,1 | 0,6 | 5 | 2 | 20 | 2007 |
| 13,5 | 15,1 | 0,6 | 3 | 2 | 19 | 2010 |
| 13,5 | 15,1 | 0,6 | 3 | 2 | 19 | 2010 |
| 13,5 | 15,1 | 0,6 | 6 | 2 | 19 | 2015 |
| 13,1 | 13,8 | 0,6 | 3 | 2 | 20 | 2000 |
| 13,1 | 13,8 | 0,6 | 2 | 2 | 20 | 2009 |
| 13,1 | 13,8 | 0,6 | 2 | 2 | 19 | 2012 |
| 13,1 | 13,8 | 0,6 | 2 | 2 | 17 | 2014 |

|      |      |     |   |   |    |      |
|------|------|-----|---|---|----|------|
| 13,1 | 13,8 | 0,6 | 2 | 2 | 19 | 2014 |
| 18   | 35,8 | 0,6 | 6 | 2 | 21 | 2014 |
| 14,8 | 19,9 | 0,6 | 2 | 2 | 23 | 2003 |
| 14,8 | 19,9 | 0,6 | 3 | 2 | 21 | 2014 |
| 14,7 | 19,5 | 0,6 | 3 | 2 | 21 | 2015 |
| 16,2 | 26,1 | 0,6 | 5 | 2 | 23 | 2008 |
| 16,2 | 26,1 | 0,6 | 7 | 2 | 19 | 2012 |
| 16,2 | 26,1 | 0,6 | 5 | 2 | 19 | 2013 |
| 16,3 | 26,6 | 0,6 | 4 | 2 | 18 | 2015 |
| 15,3 | 22   | 0,6 | 4 | 2 | 22 | 1999 |
| 15,3 | 22   | 0,6 | 7 | 2 | 21 | 2010 |
| 15,3 | 22   | 0,6 | 7 | 2 | 21 | 2010 |
| 15,3 | 22   | 0,6 | 3 | 2 | 16 | 2015 |
| 16,4 | 27,1 | 0,6 | 8 | 2 | 20 | 2010 |
| 16,4 | 27,1 | 0,6 | 8 | 2 | 20 | 2010 |
| 13,9 | 16,5 | 0,6 | 3 | 2 | 25 | 2007 |
| 13,9 | 16,5 | 0,6 | 3 | 2 | 18 | 2014 |
| 12,5 | 12   | 0,6 | 4 | 2 | 26 | 2006 |
| 12,5 | 12   | 0,6 | 5 | 2 | 20 | 2007 |
| 12,5 | 12   | 0,6 | 2 | 2 | 18 | 2014 |
| 16,5 | 27,6 | 0,6 | 4 | 2 | 20 | 2003 |
| 16,5 | 27,6 | 0,6 | 6 | 2 | 23 | 2011 |
| 13,7 | 15,8 | 0,6 | 2 | 2 | 19 | 1999 |
| 13,7 | 15,8 | 0,6 | 3 | 2 | 20 | 2002 |
| 13,7 | 15,8 | 0,6 | 2 | 2 | 24 | 2006 |
| 13,7 | 15,8 | 0,6 | 3 | 2 | 22 | 2011 |
| 13,7 | 15,8 | 0,6 | 3 | 2 | 18 | 2014 |
| 13   | 13,5 | 0,6 | 3 | 2 | 21 | 2005 |

|      |      |     |   |   |    |      |
|------|------|-----|---|---|----|------|
| 13   | 13,5 | 0,6 | 4 | 2 | 25 | 2005 |
| 13   | 13,5 | 0,6 | 2 | 2 | 19 | 2014 |
| 17,6 | 33,5 | 0,6 | 5 | 2 | 18 | 2015 |
| 20,8 | 55,3 | 0,6 | 5 | 2 | 18 | 2012 |
| 14,2 | 17,6 | 0,6 | 7 | 2 | 22 | 2005 |
| 14,2 | 17,6 | 0,6 | 3 | 2 | 18 | 2014 |
| 17   | 30,2 | 0,6 | 4 | 2 | 18 | 2015 |
| 12,6 | 12,3 | 0,6 | 3 | 2 | 23 | 2008 |
| 12,9 | 13,2 | 0,6 | 2 | 2 | 20 | 2002 |
| 12,9 | 13,2 | 0,6 | 2 | 2 | 22 | 2011 |
| 12,9 | 13,2 | 0,6 | 2 | 2 | 19 | 2013 |
| 12,9 | 13,2 | 0,6 | 2 | 2 | 18 | 2014 |
| 15,5 | 22,9 | 0,6 | 3 | 2 | 18 | 2001 |
| 15,5 | 22,9 | 0,6 | 3 | 2 | 20 | 2003 |
| 15,5 | 22,9 | 0,6 | 6 | 2 | 23 | 2011 |
| 15,5 | 22,9 | 0,6 | 7 | 2 | 21 | 2014 |
| 15,5 | 22,9 | 0,6 | 3 | 2 | 15 | 2015 |
| 15,7 | 23,8 | 0,6 | 7 | 2 | 20 | 2006 |
| 11,6 | 9,6  | 0,6 | 2 | 2 | 25 | 2004 |
| 11,6 | 9,6  | 0,6 | 2 | 2 | 25 | 2005 |
| 15,2 | 21,6 | 0,6 | 4 | 2 | 18 | 1999 |
| 15,2 | 21,6 | 0,6 | 6 | 2 | 21 | 2008 |
| 15,2 | 21,6 | 0,6 | 4 | 2 | 19 | 2012 |
| 15,2 | 21,6 | 0,6 | 4 | 2 | 19 | 2013 |
| 13,4 | 14,8 | 0,6 | 2 | 2 | 20 | 2003 |
| 13,4 | 14,8 | 0,6 | 3 | 2 | 21 | 2006 |
| 13,4 | 14,8 | 0,6 | 2 | 2 | 20 | 2009 |
| 12,7 | 12,6 | 0,6 | 2 | 2 | 18 | 2002 |

|      |      |     |   |   |    |      |
|------|------|-----|---|---|----|------|
| 12,7 | 12,6 | 0,6 | 3 | 2 | 22 | 2005 |
| 12,7 | 12,6 | 0,6 | 2 | 2 | 20 | 2013 |
| 12,8 | 12,9 | 0,6 | 2 | 2 | 18 | 2002 |
| 12,8 | 12,9 | 0,6 | 2 | 2 | 19 | 2014 |
| 19   | 42,2 | 0,6 | 8 | 2 | 21 | 2010 |
| 19   | 42,2 | 0,6 | 8 | 2 | 21 | 2010 |
| 12,1 | 10,9 | 0,6 | 2 | 2 | 19 | 2007 |
| 12,1 | 10,9 | 0,6 | 2 | 2 | 18 | 2014 |
| 18,1 | 36,5 | 0,6 | 5 | 2 | 17 | 2014 |
| 14,3 | 18   | 0,6 | 6 | 2 | 21 | 2000 |
| 14,3 | 18   | 0,6 | 4 | 2 | 23 | 2006 |
| 14,3 | 18   | 0,6 | 2 | 2 | 23 | 2006 |
| 14,3 | 18   | 0,6 | 3 | 2 | 19 | 2011 |
| 14,3 | 18   | 0,6 | 3 | 2 | 18 | 2014 |
| 15,1 | 21,2 | 0,6 | 3 | 2 | 16 | 2015 |
| 15,1 | 21,2 | 0,6 | 4 | 2 | 22 | 2015 |
| 16,1 | 25,7 | 0,6 | 3 | 2 | 19 | 2012 |
| 16,1 | 25,7 | 0,6 | 4 | 2 | 18 | 2014 |
| 14   | 16,9 | 0,6 | 4 | 2 | 22 | 1999 |
| 14   | 16,9 | 0,6 | 2 | 2 | 17 | 2002 |
| 14   | 16,9 | 0,6 | 3 | 2 | 23 | 2010 |
| 14   | 16,9 | 0,6 | 3 | 2 | 23 | 2010 |
| 14   | 16,9 | 0,6 | 3 | 2 | 17 | 2014 |
| 14   | 16,9 | 0,6 | 3 | 2 | 19 | 2015 |
| 15,4 | 22,5 | 0,6 | 4 | 2 | 24 | 2001 |
| 13,6 | 15,5 | 0,6 | 6 | 2 | 21 | 2011 |
| 14,4 | 18,4 | 0,6 | 2 | 2 | 17 | 2002 |
| 14,4 | 18,4 | 0,6 | 3 | 2 | 23 | 2003 |

|      |      |     |   |   |    |      |
|------|------|-----|---|---|----|------|
| 16,7 | 28,7 | 0,6 | 3 | 2 | 21 | 2015 |
| 16,2 | 26,2 | 0,6 | 5 | 2 | 18 | 1999 |
| 16,2 | 26,2 | 0,6 | 4 | 2 | 20 | 2003 |
| 16,2 | 26,2 | 0,6 | 4 | 2 | 22 | 2003 |
| 16,2 | 26,2 | 0,6 | 4 | 2 | 16 | 2008 |
| 13,3 | 14,5 | 0,6 | 2 | 2 | 19 | 2002 |
| 13,3 | 14,5 | 0,6 | 4 | 2 | 18 | 2015 |
| 15,6 | 23,4 | 0,6 | 3 | 2 | 18 | 2000 |
| 13,8 | 16,2 | 0,6 | 3 | 2 | 25 | 2004 |
| 13,8 | 16,2 | 0,6 | 8 | 2 | 19 | 2010 |
| 13,8 | 16,2 | 0,6 | 3 | 2 | 23 | 2010 |
| 13,8 | 16,2 | 0,6 | 8 | 2 | 19 | 2010 |
| 13,8 | 16,2 | 0,6 | 3 | 2 | 23 | 2010 |
| 13,8 | 16,2 | 0,6 | 3 | 2 | 23 | 2011 |
| 13,8 | 16,2 | 0,6 | 2 | 2 | 17 | 2014 |
| 13,8 | 16,2 | 0,6 | 3 | 2 | 17 | 2014 |
| 18,4 | 38,4 | 0,6 | 4 | 2 | 15 | 2015 |
| 16,6 | 28,2 | 0,6 | 5 | 2 | 22 | 2003 |
| 16,3 | 26,7 | 0,6 | 9 | 2 | 22 | 2004 |
| 16,5 | 27,7 | 0,6 | 4 | 2 | 18 | 1999 |
| 14,5 | 18,8 | 0,6 | 4 | 2 | 20 | 2001 |
| 14,5 | 18,8 | 0,6 | 4 | 2 | 18 | 2015 |
| 14,9 | 20,4 | 0,6 | 3 | 2 | 25 | 2003 |
| 17   | 30,3 | 0,6 | 5 | 2 | 18 | 2000 |
| 17   | 30,3 | 0,6 | 4 | 2 | 20 | 2001 |
| 12,2 | 11,2 | 0,6 | 2 | 2 | 25 | 2007 |
| 12,2 | 11,2 | 0,6 | 2 | 2 | 18 | 2014 |
| 14,8 | 20   | 0,6 | 4 | 2 | 24 | 2006 |

|      |      |     |   |   |    |      |
|------|------|-----|---|---|----|------|
| 14,8 | 20   | 0,6 | 4 | 2 | 20 | 2013 |
| 14,8 | 20   | 0,6 | 3 | 2 | 19 | 2015 |
| 14,7 | 19,6 | 0,6 | 3 | 2 | 18 | 2002 |
| 15,3 | 22,1 | 0,6 | 4 | 2 | 20 | 2000 |
| 15,3 | 22,1 | 0,6 | 3 | 2 | 19 | 2000 |
| 15,3 | 22,1 | 0,6 | 4 | 2 | 23 | 2010 |
| 15,3 | 22,1 | 0,6 | 4 | 2 | 23 | 2010 |
| 15,3 | 22,1 | 0,6 | 4 | 2 | 23 | 2011 |
| 15,3 | 22,1 | 0,6 | 5 | 2 | 21 | 2012 |
| 17,8 | 34,8 | 0,6 | 5 | 2 | 17 | 2012 |
| 17,2 | 31,4 | 0,6 | 5 | 2 | 19 | 2013 |
| 14,1 | 17,3 | 0,6 | 2 | 2 | 18 | 2000 |
| 14,1 | 17,3 | 0,6 | 5 | 2 | 21 | 2011 |
| 14,1 | 17,3 | 0,6 | 3 | 2 | 19 | 2013 |
| 14,1 | 17,3 | 0,6 | 3 | 2 | 18 | 2015 |
| 17,9 | 35,4 | 0,6 | 5 | 2 | 17 | 2014 |
| 18   | 36   | 0,6 | 6 | 2 | 17 | 2014 |
| 16,9 | 29,8 | 0,6 | 4 | 2 | 18 | 2012 |
| 13,2 | 14,2 | 0,6 | 2 | 2 | 19 | 2002 |
| 13,2 | 14,2 | 0,6 | 3 | 2 | 22 | 2004 |
| 13,2 | 14,2 | 0,6 | 3 | 2 | 21 | 2005 |
| 13,2 | 14,2 | 0,6 | 4 | 2 | 22 | 2005 |
| 13,2 | 14,2 | 0,6 | 5 | 2 | 20 | 2007 |
| 13,2 | 14,2 | 0,6 | 3 | 2 | 20 | 2008 |
| 15,7 | 23,9 | 0,6 | 4 | 2 | 25 | 2004 |
| 15,7 | 23,9 | 0,6 | 5 | 2 | 18 | 2014 |
| 15,5 | 23   | 0,6 | 5 | 2 | 20 | 2012 |
| 15,5 | 23   | 0,6 | 4 | 2 | 21 | 2012 |

|      |      |     |   |   |    |      |
|------|------|-----|---|---|----|------|
| 15,5 | 23   | 0,6 | 3 | 2 | 20 | 2013 |
| 15,5 | 23   | 0,6 | 3 | 2 | 15 | 2015 |
| 16   | 25,3 | 0,6 | 3 | 2 | 21 | 2003 |
| 16   | 25,3 | 0,6 | 5 | 2 | 20 | 2006 |
| 16   | 25,3 | 0,6 | 5 | 2 | 18 | 2012 |
| 16   | 25,3 | 0,6 | 5 | 2 | 21 | 2014 |
| 16   | 25,3 | 0,6 | 5 | 2 | 23 | 2014 |
| 13,5 | 15,2 | 0,6 | 2 | 2 | 26 | 2001 |
| 13,5 | 15,2 | 0,6 | 2 | 2 | 23 | 2002 |
| 13,5 | 15,2 | 0,6 | 2 | 2 | 22 | 2011 |
| 13,5 | 15,2 | 0,6 | 2 | 2 | 20 | 2013 |
| 13,5 | 15,2 | 0,6 | 2 | 2 | 20 | 2013 |
| 13,5 | 15,2 | 0,6 | 2 | 2 | 17 | 2014 |
| 15,2 | 21,7 | 0,6 | 4 | 2 | 25 | 2004 |
| 15,2 | 21,7 | 0,6 | 3 | 2 | 16 | 2008 |
| 15,2 | 21,7 | 0,6 | 4 | 2 | 17 | 2009 |
| 15,2 | 21,7 | 0,6 | 4 | 2 | 21 | 2015 |
| 12,3 | 11,5 | 0,6 | 3 | 2 | 25 | 2004 |
| 12,3 | 11,5 | 0,6 | 4 | 2 | 22 | 2005 |
| 12,3 | 11,5 | 0,6 | 3 | 2 | 23 | 2005 |
| 18,4 | 38,5 | 0,6 | 6 | 2 | 19 | 2013 |
| 17,3 | 32   | 0,6 | 9 | 2 | 25 | 2004 |
| 11,5 | 9,4  | 0,6 | 2 | 2 | 23 | 2004 |
| 17,6 | 33,7 | 0,6 | 4 | 2 | 21 | 2015 |
| 14,2 | 17,7 | 0,6 | 4 | 2 | 20 | 1999 |
| 14,2 | 17,7 | 0,6 | 4 | 2 | 20 | 2010 |
| 14,2 | 17,7 | 0,6 | 4 | 2 | 20 | 2010 |
| 14,2 | 17,7 | 0,6 | 3 | 2 | 16 | 2015 |

|      |      |     |   |   |    |      |
|------|------|-----|---|---|----|------|
| 13,1 | 13,9 | 0,6 | 2 | 2 | 21 | 2001 |
| 13,1 | 13,9 | 0,6 | 2 | 2 | 25 | 2003 |
| 13,1 | 13,9 | 0,6 | 2 | 2 | 17 | 2009 |
| 13,1 | 13,9 | 0,6 | 3 | 2 | 23 | 2010 |
| 13,1 | 13,9 | 0,6 | 3 | 2 | 23 | 2010 |
| 13,1 | 13,9 | 0,6 | 2 | 2 | 19 | 2013 |
| 13,7 | 15,9 | 0,6 | 2 | 2 | 20 | 2000 |
| 13,7 | 15,9 | 0,6 | 2 | 2 | 26 | 2000 |
| 13,7 | 15,9 | 0,6 | 2 | 2 | 21 | 2001 |
| 13,7 | 15,9 | 0,6 | 3 | 2 | 18 | 2015 |
| 13,7 | 15,9 | 0,6 | 2 | 2 | 21 | 2015 |
| 17,7 | 34,3 | 0,6 | 4 | 2 | 19 | 2000 |
| 16,2 | 26,3 | 0,6 | 7 | 2 | 21 | 2014 |
| 15,1 | 21,3 | 0,6 | 5 | 2 | 25 | 2002 |
| 15,1 | 21,3 | 0,6 | 4 | 2 | 18 | 2015 |
| 18,2 | 37,3 | 0,6 | 4 | 2 | 19 | 2012 |
| 17   | 30,4 | 0,6 | 3 | 2 | 19 | 2013 |
| 17   | 30,4 | 0,6 | 5 | 2 | 20 | 2013 |
| 15,4 | 22,6 | 0,6 | 3 | 2 | 15 | 2015 |
| 16,3 | 26,8 | 0,6 | 6 | 2 | 23 | 2011 |
| 16,3 | 26,8 | 0,6 | 4 | 2 | 18 | 2014 |
| 16,5 | 27,8 | 0,6 | 5 | 2 | 18 | 2002 |
| 16,5 | 27,8 | 0,6 | 5 | 2 | 19 | 2004 |
| 12,4 | 11,8 | 0,6 | 2 | 2 | 18 | 2000 |
| 12,4 | 11,8 | 0,6 | 2 | 2 | 20 | 2001 |
| 16,4 | 27,3 | 0,6 | 5 | 2 | 22 | 2001 |
| 16,4 | 27,3 | 0,6 | 4 | 2 | 19 | 2002 |
| 16,4 | 27,3 | 0,6 | 6 | 2 | 20 | 2013 |

|      |      |     |    |   |    |      |
|------|------|-----|----|---|----|------|
| 14,3 | 18,1 | 0,6 | 5  | 2 | 23 | 1999 |
| 14,3 | 18,1 | 0,6 | 4  | 2 | 23 | 2002 |
| 14,3 | 18,1 | 0,6 | 3  | 2 | 25 | 2004 |
| 14,3 | 18,1 | 0,6 | 3  | 2 | 23 | 2010 |
| 14,3 | 18,1 | 0,6 | 3  | 2 | 23 | 2010 |
| 14,3 | 18,1 | 0,6 | 4  | 2 | 15 | 2015 |
| 15,6 | 23,5 | 0,6 | 5  | 2 | 19 | 2012 |
| 13   | 13,6 | 0,6 | 2  | 2 | 25 | 1999 |
| 13   | 13,6 | 0,6 | 3  | 2 | 23 | 2005 |
| 13   | 13,6 | 0,6 | 4  | 2 | 23 | 2006 |
| 13   | 13,6 | 0,6 | 3  | 2 | 21 | 2008 |
| 13   | 13,6 | 0,6 | 2  | 2 | 17 | 2014 |
| 12   | 10,7 | 0,6 | 2  | 2 | 20 | 2006 |
| 12   | 10,7 | 0,6 | 2  | 2 | 25 | 2007 |
| 11,2 | 8,7  | 0,6 | 2  | 2 | 20 | 2004 |
| 11,2 | 8,7  | 0,6 | 2  | 2 | 20 | 2004 |
| 13,4 | 14,9 | 0,6 | 2  | 2 | 20 | 2000 |
| 13,4 | 14,9 | 0,6 | 2  | 2 | 25 | 2008 |
| 13,4 | 14,9 | 0,6 | 2  | 2 | 19 | 2009 |
| 15   | 20,9 | 0,6 | 3  | 2 | 19 | 2007 |
| 15   | 20,9 | 0,6 | 4  | 2 | 22 | 2015 |
| 15,9 | 24,9 | 0,6 | 3  | 2 | 19 | 2000 |
| 16,9 | 29,9 | 0,6 | 7  | 2 | 22 | 1999 |
| 22,3 | 68,7 | 0,6 | 10 | 2 | 18 | 2012 |
| 12,5 | 12,1 | 0,6 | 3  | 2 | 25 | 2004 |
| 12,5 | 12,1 | 0,6 | 3  | 2 | 15 | 2015 |
| 14   | 17   | 0,6 | 5  | 2 | 18 | 2007 |
| 14   | 17   | 0,6 | 3  | 2 | 17 | 2014 |

|      |      |     |   |   |    |      |
|------|------|-----|---|---|----|------|
| 14   | 17   | 0,6 | 3 | 2 | 18 | 2015 |
| 12,9 | 13,3 | 0,6 | 2 | 2 | 24 | 2006 |
| 12,9 | 13,3 | 0,6 | 2 | 2 | 24 | 2006 |
| 12,9 | 13,3 | 0,6 | 3 | 2 | 23 | 2010 |
| 12,9 | 13,3 | 0,6 | 3 | 2 | 23 | 2010 |
| 14,4 | 18,5 | 0,6 | 5 | 2 | 21 | 1999 |
| 14,4 | 18,5 | 0,6 | 5 | 2 | 18 | 2000 |
| 14,4 | 18,5 | 0,6 | 2 | 2 | 26 | 2000 |
| 14,4 | 18,5 | 0,6 | 3 | 2 | 20 | 2003 |
| 14,4 | 18,5 | 0,6 | 3 | 2 | 18 | 2008 |
| 14,4 | 18,5 | 0,6 | 4 | 2 | 20 | 2013 |
| 14,4 | 18,5 | 0,6 | 3 | 2 | 16 | 2015 |
| 14,4 | 18,5 | 0,6 | 3 | 2 | 21 | 2015 |
| 14,9 | 20,5 | 0,6 | 3 | 2 | 20 | 2006 |
| 14,9 | 20,5 | 0,6 | 4 | 2 | 19 | 2012 |
| 14,9 | 20,5 | 0,6 | 3 | 2 | 17 | 2014 |
| 15,3 | 22,2 | 0,6 | 4 | 2 | 23 | 1999 |
| 15,3 | 22,2 | 0,6 | 4 | 2 | 18 | 2000 |
| 15,3 | 22,2 | 0,6 | 5 | 2 | 26 | 2000 |
| 15,3 | 22,2 | 0,6 | 4 | 2 | 20 | 2003 |
| 15,3 | 22,2 | 0,6 | 6 | 2 | 20 | 2011 |
| 15,3 | 22,2 | 0,6 | 4 | 2 | 15 | 2015 |
| 15,3 | 22,2 | 0,6 | 4 | 2 | 16 | 2015 |
| 12,6 | 12,4 | 0,6 | 2 | 2 | 26 | 1999 |
| 12,6 | 12,4 | 0,6 | 2 | 2 | 20 | 2009 |
| 12,8 | 13   | 0,6 | 2 | 2 | 23 | 2007 |
| 14,5 | 18,9 | 0,6 | 3 | 2 | 26 | 2003 |
| 14,5 | 18,9 | 0,6 | 5 | 2 | 19 | 2007 |

|      |      |     |    |   |    |      |
|------|------|-----|----|---|----|------|
| 14,5 | 18,9 | 0,6 | 4  | 2 | 20 | 2013 |
| 19,1 | 43,2 | 0,6 | 10 | 2 | 21 | 2013 |
| 14,8 | 20,1 | 0,6 | 3  | 2 | 19 | 2012 |
| 16   | 25,4 | 0,6 | 3  | 2 | 18 | 2000 |
| 16   | 25,4 | 0,6 | 4  | 2 | 22 | 2004 |
| 14,6 | 19,3 | 0,6 | 3  | 2 | 21 | 2003 |
| 14,6 | 19,3 | 0,6 | 3  | 2 | 22 | 2003 |
| 14,6 | 19,3 | 0,6 | 4  | 2 | 22 | 2004 |
| 14,6 | 19,3 | 0,6 | 4  | 2 | 20 | 2013 |
| 13,6 | 15,6 | 0,6 | 5  | 2 | 25 | 2007 |
| 13,6 | 15,6 | 0,6 | 2  | 2 | 20 | 2008 |
| 13,6 | 15,6 | 0,6 | 6  | 2 | 25 | 2008 |
| 13,6 | 15,6 | 0,6 | 2  | 2 | 19 | 2012 |
| 15,7 | 24   | 0,6 | 5  | 2 | 18 | 1999 |
| 15,7 | 24   | 0,6 | 5  | 2 | 26 | 2006 |
| 14,7 | 19,7 | 0,6 | 6  | 2 | 26 | 1999 |
| 14,7 | 19,7 | 0,6 | 3  | 2 | 26 | 2003 |
| 14,7 | 19,7 | 0,6 | 4  | 2 | 20 | 2004 |
| 14,7 | 19,7 | 0,6 | 4  | 2 | 20 | 2009 |
| 14,7 | 19,7 | 0,6 | 3  | 2 | 20 | 2013 |
| 13,8 | 16,3 | 0,6 | 2  | 2 | 18 | 2002 |
| 13,8 | 16,3 | 0,6 | 4  | 2 | 17 | 2009 |
| 13,8 | 16,3 | 0,6 | 3  | 2 | 22 | 2011 |
| 15,5 | 23,1 | 0,6 | 3  | 2 | 23 | 2003 |
| 15,5 | 23,1 | 0,6 | 3  | 2 | 20 | 2011 |
| 15,5 | 23,1 | 0,6 | 3  | 2 | 18 | 2014 |
| 10,7 | 7,6  | 0,6 | 1  | 2 | 23 | 2009 |
| 13,3 | 14,6 | 0,6 | 4  | 2 | 23 | 2009 |

|      |      |     |   |   |    |      |
|------|------|-----|---|---|----|------|
| 13,3 | 14,6 | 0,6 | 2 | 2 | 26 | 2009 |
| 13,3 | 14,6 | 0,6 | 2 | 2 | 19 | 2013 |
| 13,3 | 14,6 | 0,6 | 3 | 2 | 19 | 2014 |
| 13,3 | 14,6 | 0,6 | 2 | 2 | 21 | 2014 |
| 18   | 36,2 | 0,6 | 6 | 2 | 19 | 2000 |
| 14,1 | 17,4 | 0,6 | 3 | 2 | 21 | 2001 |
| 14,1 | 17,4 | 0,6 | 3 | 2 | 19 | 2004 |
| 14,1 | 17,4 | 0,6 | 5 | 2 | 18 | 2007 |
| 14,1 | 17,4 | 0,6 | 4 | 2 | 19 | 2008 |
| 14,1 | 17,4 | 0,6 | 3 | 2 | 19 | 2008 |
| 14,1 | 17,4 | 0,6 | 3 | 2 | 19 | 2008 |
| 14,1 | 17,4 | 0,6 | 3 | 2 | 20 | 2011 |
| 14,1 | 17,4 | 0,6 | 3 | 2 | 19 | 2014 |
| 15,2 | 21,8 | 0,6 | 4 | 2 | 21 | 2013 |
| 15,2 | 21,8 | 0,6 | 7 | 2 | 19 | 2014 |
| 11,8 | 10,2 | 0,6 | 2 | 2 | 18 | 2014 |
| 16,6 | 28,4 | 0,6 | 8 | 2 | 20 | 2010 |
| 16,6 | 28,4 | 0,6 | 8 | 2 | 20 | 2010 |
| 12,1 | 11   | 0,6 | 3 | 2 | 26 | 2005 |
| 12,1 | 11   | 0,6 | 2 | 2 | 23 | 2011 |
| 16,2 | 26,4 | 0,6 | 5 | 2 | 20 | 2011 |
| 11,4 | 9,2  | 0,6 | 1 | 2 | 26 | 2001 |
| 16,5 | 27,9 | 0,6 | 4 | 2 | 18 | 2000 |
| 16,5 | 27,9 | 0,6 | 6 | 2 | 26 | 2001 |
| 16,5 | 27,9 | 0,6 | 3 | 2 | 19 | 2013 |
| 16,3 | 26,9 | 0,6 | 5 | 2 | 20 | 2004 |
| 16,4 | 27,4 | 0,6 | 5 | 2 | 20 | 2000 |
| 16,4 | 27,4 | 0,6 | 4 | 2 | 22 | 2004 |

|      |      |     |    |   |    |      |
|------|------|-----|----|---|----|------|
| 16,4 | 27,4 | 0,6 | 3  | 2 | 16 | 2015 |
| 18,4 | 38,7 | 0,6 | 6  | 2 | 19 | 2013 |
| 22,7 | 72,7 | 0,6 | 10 | 2 | 18 | 2012 |
| 15,1 | 21,4 | 0,6 | 5  | 2 | 19 | 1999 |
| 15,1 | 21,4 | 0,6 | 7  | 2 | 22 | 2001 |
| 15,1 | 21,4 | 0,6 | 3  | 2 | 17 | 2002 |
| 15,6 | 23,6 | 0,6 | 5  | 2 | 20 | 2001 |
| 15,6 | 23,6 | 0,6 | 4  | 2 | 19 | 2004 |
| 15,6 | 23,6 | 0,6 | 5  | 2 | 20 | 2007 |
| 14,2 | 17,8 | 0,6 | 3  | 2 | 21 | 2005 |
| 14,2 | 17,8 | 0,6 | 3  | 2 | 19 | 2007 |
| 14,2 | 17,8 | 0,6 | 4  | 2 | 23 | 2011 |
| 14,2 | 17,8 | 0,6 | 3  | 2 | 17 | 2014 |
| 14,2 | 17,8 | 0,6 | 3  | 2 | 17 | 2014 |
| 13,2 | 14,3 | 0,6 | 2  | 2 | 18 | 2002 |
| 13,2 | 14,3 | 0,6 | 2  | 2 | 20 | 2013 |
| 13,2 | 14,3 | 0,6 | 2  | 2 | 22 | 2013 |
| 13,2 | 14,3 | 0,6 | 2  | 2 | 21 | 2014 |
| 13,2 | 14,3 | 0,6 | 2  | 2 | 23 | 2014 |
| 13,9 | 16,7 | 0,6 | 3  | 2 | 20 | 2002 |
| 13,9 | 16,7 | 0,6 | 3  | 2 | 18 | 2008 |
| 13,9 | 16,7 | 0,6 | 3  | 2 | 19 | 2012 |
| 13,9 | 16,7 | 0,6 | 3  | 2 | 23 | 2015 |
| 13,5 | 15,3 | 0,6 | 2  | 2 | 18 | 2002 |
| 13,5 | 15,3 | 0,6 | 3  | 2 | 20 | 2008 |
| 18,2 | 37,5 | 0,6 | 7  | 2 | 17 | 2014 |
| 18,2 | 37,5 | 0,6 | 4  | 2 | 18 | 2015 |
| 15   | 21   | 0,6 | 6  | 2 | 19 | 2001 |

|      |      |     |   |   |    |      |
|------|------|-----|---|---|----|------|
| 15   | 21   | 0,6 | 6 | 2 | 19 | 2013 |
| 13,7 | 16   | 0,6 | 3 | 2 | 22 | 1999 |
| 13,7 | 16   | 0,6 | 2 | 2 | 24 | 2001 |
| 13,7 | 16   | 0,6 | 6 | 2 | 22 | 2005 |
| 13,7 | 16   | 0,6 | 2 | 2 | 22 | 2009 |
| 13,7 | 16   | 0,6 | 8 | 2 | 22 | 2011 |
| 18,1 | 36,9 | 0,6 | 7 | 2 | 19 | 2012 |
| 12,2 | 11,3 | 0,6 | 2 | 2 | 20 | 2002 |
| 12,2 | 11,3 | 0,6 | 3 | 2 | 22 | 2005 |
| 12,2 | 11,3 | 0,6 | 2 | 2 | 22 | 2011 |
| 12,2 | 11,3 | 0,6 | 2 | 2 | 19 | 2014 |
| 14,3 | 18,2 | 0,6 | 4 | 2 | 26 | 1999 |
| 14,3 | 18,2 | 0,6 | 3 | 2 | 23 | 2003 |
| 14,3 | 18,2 | 0,6 | 5 | 2 | 19 | 2007 |
| 14,3 | 18,2 | 0,6 | 6 | 2 | 20 | 2007 |
| 14,3 | 18,2 | 0,6 | 3 | 2 | 18 | 2015 |
| 19   | 42,7 | 0,6 | 5 | 2 | 19 | 2012 |
| 16   | 25,5 | 0,6 | 4 | 2 | 21 | 2001 |
| 16   | 25,5 | 0,6 | 5 | 2 | 20 | 2007 |
| 16   | 25,5 | 0,6 | 4 | 2 | 20 | 2012 |
| 15,3 | 22,3 | 0,6 | 3 | 2 | 22 | 2003 |
| 14,9 | 20,6 | 0,6 | 4 | 2 | 20 | 1999 |
| 14,9 | 20,6 | 0,6 | 4 | 2 | 26 | 2006 |
| 14,9 | 20,6 | 0,6 | 4 | 2 | 19 | 2011 |
| 14,9 | 20,6 | 0,6 | 3 | 2 | 21 | 2012 |
| 13,1 | 14   | 0,6 | 5 | 2 | 20 | 2000 |
| 13,1 | 14   | 0,6 | 3 | 2 | 25 | 2005 |
| 13,1 | 14   | 0,6 | 3 | 2 | 19 | 2013 |

|      |      |     |   |   |    |      |
|------|------|-----|---|---|----|------|
| 13,1 | 14   | 0,6 | 2 | 2 | 19 | 2014 |
| 13,1 | 14   | 0,6 | 2 | 2 | 21 | 2015 |
| 15,7 | 24,1 | 0,6 | 5 | 2 | 22 | 1999 |
| 15,7 | 24,1 | 0,6 | 6 | 2 | 22 | 2000 |
| 15,7 | 24,1 | 0,6 | 3 | 2 | 20 | 2003 |
| 17   | 30,6 | 0,6 | 3 | 2 | 15 | 2015 |
| 14,4 | 18,6 | 0,6 | 3 | 2 | 20 | 2000 |
| 14,4 | 18,6 | 0,6 | 4 | 2 | 24 | 2006 |
| 14,4 | 18,6 | 0,6 | 3 | 2 | 15 | 2015 |
| 16,1 | 26   | 0,6 | 5 | 2 | 19 | 2014 |
| 14,8 | 20,2 | 0,6 | 3 | 2 | 21 | 2000 |
| 14,8 | 20,2 | 0,6 | 4 | 2 | 23 | 2004 |
| 14   | 17,1 | 0,6 | 3 | 2 | 22 | 2000 |
| 14   | 17,1 | 0,6 | 2 | 2 | 18 | 2002 |
| 14   | 17,1 | 0,6 | 4 | 2 | 20 | 2008 |
| 14   | 17,1 | 0,6 | 3 | 2 | 20 | 2011 |
| 14   | 17,1 | 0,6 | 3 | 2 | 21 | 2014 |
| 14   | 17,1 | 0,6 | 3 | 2 | 23 | 2014 |
| 14,5 | 19   | 0,6 | 5 | 2 | 22 | 1999 |
| 14,5 | 19   | 0,6 | 4 | 2 | 21 | 2011 |
| 14,5 | 19   | 0,6 | 3 | 2 | 20 | 2013 |
| 14,5 | 19   | 0,6 | 4 | 2 | 18 | 2015 |
| 16,2 | 26,5 | 0,6 | 4 | 2 | 20 | 2000 |
| 16,2 | 26,5 | 0,6 | 5 | 2 | 18 | 2012 |
| 16,5 | 28   | 0,6 | 4 | 2 | 19 | 2001 |
| 14,7 | 19,8 | 0,6 | 4 | 2 | 20 | 1999 |
| 14,7 | 19,8 | 0,6 | 3 | 2 | 21 | 2000 |
| 14,7 | 19,8 | 0,6 | 2 | 2 | 24 | 2001 |

|      |      |     |   |   |    |      |
|------|------|-----|---|---|----|------|
| 14,7 | 19,8 | 0,6 | 3 | 2 | 16 | 2015 |
| 12,3 | 11,6 | 0,6 | 2 | 2 | 20 | 2004 |
| 12,3 | 11,6 | 0,6 | 2 | 2 | 20 | 2013 |
| 14,6 | 19,4 | 0,6 | 3 | 2 | 23 | 2001 |
| 13,4 | 15   | 0,6 | 2 | 2 | 19 | 2000 |
| 13,4 | 15   | 0,6 | 2 | 2 | 26 | 2000 |
| 13,4 | 15   | 0,6 | 2 | 2 | 20 | 2002 |
| 13,4 | 15   | 0,6 | 4 | 2 | 20 | 2009 |
| 13,4 | 15   | 0,6 | 2 | 2 | 22 | 2009 |
| 16,3 | 27   | 0,6 | 4 | 2 | 19 | 2013 |
| 16,3 | 27   | 0,6 | 4 | 2 | 19 | 2015 |
| 16,4 | 27,5 | 0,6 | 5 | 2 | 20 | 1999 |
| 16,4 | 27,5 | 0,6 | 7 | 2 | 18 | 2014 |
| 13   | 13,7 | 0,6 | 2 | 2 | 19 | 2002 |
| 13   | 13,7 | 0,6 | 3 | 2 | 21 | 2008 |
| 13   | 13,7 | 0,6 | 4 | 2 | 26 | 2009 |
| 13   | 13,7 | 0,6 | 2 | 2 | 19 | 2013 |
| 13   | 13,7 | 0,6 | 2 | 2 | 19 | 2013 |
| 13   | 13,7 | 0,6 | 2 | 2 | 19 | 2013 |
| 13   | 13,7 | 0,6 | 2 | 2 | 19 | 2013 |
| 13   | 13,7 | 0,6 | 2 | 2 | 18 | 2014 |
| 15,2 | 21,9 | 0,6 | 5 | 2 | 21 | 2000 |
| 15,2 | 21,9 | 0,6 | 4 | 2 | 18 | 2015 |
| 15,8 | 24,6 | 0,6 | 4 | 2 | 22 | 2004 |
| 15,8 | 24,6 | 0,6 | 4 | 2 | 18 | 2012 |
| 15,8 | 24,6 | 0,6 | 4 | 2 | 20 | 2013 |
| 11,3 | 9    | 0,6 | 2 | 2 | 18 | 2007 |
| 17,3 | 32,3 | 0,6 | 4 | 2 | 20 | 2003 |

|      |      |     |    |   |    |      |
|------|------|-----|----|---|----|------|
| 17,3 | 32,3 | 0,6 | 3  | 2 | 22 | 2003 |
| 17,3 | 32,3 | 0,6 | 4  | 2 | 17 | 2012 |
| 18,1 | 37   | 0,6 | 10 | 2 | 17 | 2008 |
| 17,1 | 31,2 | 0,6 | 4  | 2 | 18 | 2012 |
| 13,8 | 16,4 | 0,6 | 3  | 2 | 25 | 2008 |
| 13,8 | 16,4 | 0,6 | 3  | 2 | 15 | 2015 |
| 12,4 | 11,9 | 0,6 | 2  | 2 | 19 | 2000 |
| 12,4 | 11,9 | 0,6 | 2  | 2 | 20 | 2002 |
| 12,4 | 11,9 | 0,6 | 2  | 2 | 20 | 2002 |
| 12,4 | 11,9 | 0,6 | 2  | 2 | 15 | 2015 |
| 13,6 | 15,7 | 0,6 | 2  | 2 | 23 | 2002 |
| 13,6 | 15,7 | 0,6 | 2  | 2 | 25 | 2003 |
| 13,6 | 15,7 | 0,6 | 3  | 2 | 21 | 2011 |
| 13,6 | 15,7 | 0,6 | 3  | 2 | 18 | 2014 |
| 18   | 36,4 | 0,6 | 5  | 2 | 19 | 2013 |
| 17,9 | 35,8 | 0,6 | 9  | 2 | 20 | 2011 |
| 12,9 | 13,4 | 0,6 | 3  | 2 | 18 | 2014 |
| 16,8 | 29,6 | 0,6 | 4  | 2 | 19 | 2013 |
| 15,4 | 22,8 | 0,6 | 6  | 2 | 23 | 2011 |
| 15,6 | 23,7 | 0,6 | 5  | 2 | 21 | 2009 |
| 14,1 | 17,5 | 0,6 | 5  | 2 | 21 | 2000 |
| 14,1 | 17,5 | 0,6 | 2  | 2 | 23 | 2001 |
| 14,1 | 17,5 | 0,6 | 2  | 2 | 26 | 2003 |
| 14,1 | 17,5 | 0,6 | 2  | 2 | 20 | 2013 |
| 20,1 | 50,7 | 0,6 | 7  | 2 | 17 | 2014 |
| 11,7 | 10   | 0,6 | 2  | 2 | 20 | 2004 |
| 11,7 | 10   | 0,6 | 2  | 2 | 23 | 2004 |
| 15,9 | 25,1 | 0,6 | 4  | 2 | 26 | 2003 |

|      |       |     |   |   |    |      |
|------|-------|-----|---|---|----|------|
| 12,5 | 12,2  | 0,6 | 3 | 2 | 22 | 2005 |
| 12,5 | 12,2  | 0,6 | 2 | 2 | 25 | 2007 |
| 12,5 | 12,2  | 0,6 | 2 | 2 | 19 | 2009 |
| 12,5 | 12,2  | 0,6 | 2 | 2 | 26 | 2009 |
| 12,8 | 13,1  | 0,6 | 2 | 2 | 24 | 2006 |
| 12,8 | 13,1  | 0,6 | 2 | 2 | 23 | 2011 |
| 12,8 | 13,1  | 0,6 | 2 | 2 | 19 | 2013 |
| 13,3 | 14,7  | 0,6 | 2 | 2 | 19 | 2002 |
| 13,3 | 14,7  | 0,6 | 2 | 2 | 20 | 2002 |
| 13,3 | 14,7  | 0,6 | 3 | 2 | 23 | 2005 |
| 13,3 | 14,7  | 0,6 | 3 | 2 | 25 | 2008 |
| 13,3 | 14,7  | 0,6 | 2 | 2 | 19 | 2013 |
| 13,3 | 14,7  | 0,6 | 2 | 2 | 18 | 2014 |
| 12,6 | 12,5  | 0,6 | 2 | 2 | 20 | 2004 |
| 12,6 | 12,5  | 0,6 | 2 | 2 | 23 | 2006 |
| 12,6 | 12,5  | 0,6 | 2 | 2 | 19 | 2013 |
| 12,7 | 12,8  | 0,6 | 3 | 2 | 22 | 2005 |
| 12,7 | 12,8  | 0,6 | 3 | 2 | 23 | 2010 |
| 12,7 | 12,8  | 0,6 | 3 | 2 | 23 | 2010 |
| 12,7 | 12,8  | 0,6 | 2 | 2 | 19 | 2014 |
| 12,5 | 12,21 | 0,6 | 2 | 2 | 23 | 2010 |
| 12,5 | 12,21 | 0,6 | 2 | 2 | 23 | 2010 |
| 14,2 | 17,9  | 0,6 | 4 | 2 | 22 | 2001 |
| 14,2 | 17,9  | 0,6 | 3 | 2 | 19 | 2007 |
| 14,2 | 17,9  | 0,6 | 8 | 2 | 24 | 2009 |
| 15   | 21,1  | 0,6 | 6 | 2 | 24 | 2001 |
| 15   | 21,1  | 0,6 | 3 | 2 | 20 | 2002 |
| 15   | 21,1  | 0,6 | 6 | 2 | 18 | 2008 |

|      |      |     |   |   |    |      |
|------|------|-----|---|---|----|------|
| 15   | 21,1 | 0,6 | 5 | 2 | 19 | 2014 |
| 15,7 | 24,2 | 0,6 | 4 | 2 | 19 | 2008 |
| 15,7 | 24,2 | 0,6 | 4 | 2 | 23 | 2011 |
| 15,3 | 22,4 | 0,6 | 3 | 2 | 21 | 2003 |
| 15,3 | 22,4 | 0,6 | 7 | 2 | 26 | 2009 |
| 15,3 | 22,4 | 0,6 | 4 | 2 | 20 | 2011 |
| 15,3 | 22,4 | 0,6 | 4 | 2 | 18 | 2014 |
| 16,5 | 28,1 | 0,6 | 7 | 2 | 21 | 1999 |
| 16,5 | 28,1 | 0,6 | 6 | 2 | 19 | 2001 |
| 13,9 | 16,8 | 0,6 | 3 | 2 | 25 | 2007 |
| 15,5 | 23,3 | 0,6 | 7 | 2 | 21 | 2012 |
| 16,3 | 27,1 | 0,6 | 5 | 2 | 23 | 2002 |
| 17,3 | 32,4 | 0,6 | 4 | 2 | 17 | 2014 |
| 17,3 | 32,4 | 0,6 | 5 | 2 | 19 | 2014 |
| 14,9 | 20,7 | 0,6 | 5 | 2 | 19 | 2007 |
| 14,3 | 18,3 | 0,6 | 3 | 2 | 23 | 2003 |
| 14,3 | 18,3 | 0,6 | 4 | 2 | 20 | 2006 |
| 14,3 | 18,3 | 0,6 | 4 | 2 | 20 | 2009 |
| 14,3 | 18,3 | 0,6 | 4 | 2 | 19 | 2014 |
| 17,8 | 35,3 | 0,6 | 4 | 2 | 15 | 2015 |
| 13,5 | 15,4 | 0,6 | 2 | 2 | 25 | 2005 |
| 13,2 | 14,4 | 0,6 | 2 | 2 | 26 | 1999 |
| 13,2 | 14,4 | 0,6 | 3 | 2 | 22 | 2005 |
| 13,2 | 14,4 | 0,6 | 3 | 2 | 18 | 2007 |
| 13,2 | 14,4 | 0,6 | 2 | 2 | 19 | 2014 |
| 13,7 | 16,1 | 0,6 | 3 | 2 | 23 | 1999 |
| 13,7 | 16,1 | 0,6 | 2 | 2 | 19 | 2000 |
| 13,7 | 16,1 | 0,6 | 3 | 2 | 23 | 2008 |

|      |      |     |   |   |    |      |
|------|------|-----|---|---|----|------|
| 14,8 | 20,3 | 0,6 | 4 | 2 | 18 | 2000 |
| 14,8 | 20,3 | 0,6 | 6 | 2 | 20 | 2000 |
| 14,8 | 20,3 | 0,6 | 3 | 2 | 19 | 2002 |
| 14,8 | 20,3 | 0,6 | 3 | 2 | 24 | 2002 |
| 15,8 | 24,7 | 0,6 | 3 | 2 | 23 | 2003 |
| 15,8 | 24,7 | 0,6 | 4 | 2 | 26 | 2003 |
| 14,4 | 18,7 | 0,6 | 4 | 2 | 21 | 1999 |
| 14,4 | 18,7 | 0,6 | 4 | 2 | 22 | 1999 |
| 14,4 | 18,7 | 0,6 | 4 | 2 | 23 | 1999 |
| 14,4 | 18,7 | 0,6 | 3 | 2 | 18 | 2000 |
| 14,4 | 18,7 | 0,6 | 2 | 2 | 19 | 2000 |
| 11,2 | 8,8  | 0,6 | 2 | 2 | 25 | 2004 |
| 15,2 | 22   | 0,6 | 3 | 2 | 21 | 2001 |
| 15,2 | 22   | 0,6 | 4 | 2 | 25 | 2003 |
| 15,2 | 22   | 0,6 | 4 | 2 | 19 | 2007 |
| 15,2 | 22   | 0,6 | 6 | 2 | 22 | 2011 |
| 15,2 | 22   | 0,6 | 4 | 2 | 20 | 2013 |
| 14,7 | 19,9 | 0,6 | 3 | 2 | 23 | 2003 |
| 14,7 | 19,9 | 0,6 | 3 | 2 | 16 | 2015 |
| 14,5 | 19,1 | 0,6 | 3 | 2 | 18 | 2000 |
| 14,5 | 19,1 | 0,6 | 4 | 2 | 23 | 2002 |
| 14,5 | 19,1 | 0,6 | 4 | 2 | 19 | 2012 |
| 12,1 | 11,1 | 0,6 | 3 | 2 | 21 | 2005 |
| 12,1 | 11,1 | 0,6 | 2 | 2 | 26 | 2006 |
| 12,1 | 11,1 | 0,6 | 2 | 2 | 23 | 2007 |
| 12,1 | 11,1 | 0,6 | 2 | 2 | 23 | 2007 |
| 12,1 | 11,1 | 0,6 | 2 | 2 | 23 | 2007 |
| 12,1 | 11,1 | 0,6 | 2 | 2 | 23 | 2010 |

|      |      |     |    |   |    |      |
|------|------|-----|----|---|----|------|
| 12,1 | 11,1 | 0,6 | 2  | 2 | 23 | 2010 |
| 14,6 | 19,5 | 0,6 | 3  | 2 | 18 | 2000 |
| 14,6 | 19,5 | 0,6 | 3  | 2 | 18 | 2000 |
| 14   | 17,2 | 0,6 | 3  | 2 | 18 | 1999 |
| 14   | 17,2 | 0,6 | 4  | 2 | 25 | 1999 |
| 14   | 17,2 | 0,6 | 3  | 2 | 23 | 2007 |
| 14   | 17,2 | 0,6 | 3  | 2 | 21 | 2014 |
| 14   | 17,2 | 0,6 | 3  | 2 | 23 | 2014 |
| 11,8 | 10,3 | 0,6 | 2  | 2 | 20 | 2002 |
| 11,8 | 10,3 | 0,6 | 2  | 2 | 20 | 2004 |
| 15,6 | 23,8 | 0,6 | 4  | 2 | 25 | 2004 |
| 17,2 | 31,9 | 0,6 | 10 | 2 | 20 | 2011 |
| 19   | 43   | 0,6 | 7  | 2 | 18 | 2012 |
| 15,9 | 25,2 | 0,6 | 5  | 2 | 21 | 1999 |
| 17,5 | 33,6 | 0,6 | 4  | 2 | 21 | 2015 |
| 17,5 | 33,6 | 0,6 | 6  | 2 | 22 | 2015 |
| 15,4 | 22,9 | 0,6 | 3  | 2 | 21 | 2001 |
| 15,4 | 22,9 | 0,6 | 3  | 2 | 19 | 2012 |
| 15,4 | 22,9 | 0,6 | 3  | 2 | 17 | 2014 |
| 13,1 | 14,1 | 0,6 | 3  | 2 | 21 | 2005 |
| 13,1 | 14,1 | 0,6 | 2  | 2 | 26 | 2009 |
| 13,1 | 14,1 | 0,6 | 2  | 2 | 22 | 2011 |
| 13,1 | 14,1 | 0,6 | 4  | 2 | 18 | 2015 |
| 16   | 25,7 | 0,6 | 5  | 2 | 21 | 1999 |
| 16   | 25,7 | 0,6 | 4  | 2 | 19 | 2013 |
| 13,4 | 15,1 | 0,6 | 2  | 2 | 22 | 2000 |
| 13,4 | 15,1 | 0,6 | 2  | 2 | 23 | 2001 |
| 13,4 | 15,1 | 0,6 | 3  | 2 | 21 | 2005 |

|      |      |     |   |   |    |      |
|------|------|-----|---|---|----|------|
| 16,5 | 28,2 | 0,6 | 8 | 2 | 21 | 2015 |
| 12,2 | 11,4 | 0,6 | 2 | 2 | 19 | 2014 |
| 12,2 | 11,4 | 0,6 | 2 | 2 | 21 | 2014 |
| 13,8 | 16,5 | 0,6 | 3 | 2 | 23 | 2010 |
| 13,8 | 16,5 | 0,6 | 3 | 2 | 23 | 2010 |
| 11,6 | 9,8  | 0,6 | 2 | 2 | 20 | 2004 |
| 11,6 | 9,8  | 0,6 | 2 | 2 | 25 | 2004 |
| 11,6 | 9,8  | 0,6 | 2 | 2 | 18 | 2007 |
| 14,1 | 17,6 | 0,6 | 2 | 2 | 21 | 2000 |
| 14,1 | 17,6 | 0,6 | 4 | 2 | 24 | 2009 |
| 14,1 | 17,6 | 0,6 | 3 | 2 | 18 | 2014 |
| 17,1 | 31,4 | 0,6 | 4 | 2 | 19 | 2012 |
| 17,1 | 31,4 | 0,6 | 4 | 2 | 16 | 2015 |
| 16,4 | 27,7 | 0,6 | 7 | 2 | 21 | 2001 |
| 16,2 | 26,7 | 0,6 | 5 | 2 | 19 | 2000 |
| 18,9 | 42,4 | 0,6 | 9 | 2 | 19 | 2012 |
| 13,6 | 15,8 | 0,6 | 3 | 2 | 21 | 2008 |
| 13,6 | 15,8 | 0,6 | 3 | 2 | 19 | 2015 |
| 13   | 13,8 | 0,6 | 3 | 2 | 21 | 2005 |
| 13   | 13,8 | 0,6 | 2 | 2 | 23 | 2006 |
| 13   | 13,8 | 0,6 | 3 | 2 | 23 | 2007 |
| 13   | 13,8 | 0,6 | 3 | 2 | 23 | 2007 |
| 13   | 13,8 | 0,6 | 3 | 2 | 21 | 2008 |
| 13   | 13,8 | 0,6 | 2 | 2 | 22 | 2009 |
| 13   | 13,8 | 0,6 | 2 | 2 | 21 | 2014 |
| 13   | 13,8 | 0,6 | 2 | 2 | 23 | 2014 |
| 15   | 21,2 | 0,6 | 6 | 2 | 22 | 2000 |
| 15   | 21,2 | 0,6 | 5 | 2 | 19 | 2000 |

|      |      |     |   |   |    |      |
|------|------|-----|---|---|----|------|
| 15   | 21,2 | 0,6 | 6 | 2 | 19 | 2001 |
| 15   | 21,2 | 0,6 | 5 | 2 | 22 | 2007 |
| 15,3 | 22,5 | 0,6 | 2 | 2 | 24 | 2001 |
| 15,3 | 22,5 | 0,6 | 3 | 2 | 21 | 2003 |
| 15,3 | 22,5 | 0,6 | 4 | 2 | 19 | 2012 |
| 15,3 | 22,5 | 0,6 | 5 | 2 | 21 | 2014 |
| 15,3 | 22,5 | 0,6 | 3 | 2 | 18 | 2015 |
| 19   | 43,1 | 0,6 | 5 | 2 | 19 | 2012 |
| 15,5 | 23,4 | 0,6 | 3 | 2 | 18 | 2014 |
| 15,5 | 23,4 | 0,6 | 5 | 2 | 19 | 2014 |
| 16,8 | 29,8 | 0,6 | 5 | 2 | 20 | 2011 |
| 16,8 | 29,8 | 0,6 | 3 | 2 | 21 | 2014 |
| 14,2 | 18   | 0,6 | 4 | 2 | 23 | 2006 |
| 14,2 | 18   | 0,6 | 3 | 2 | 23 | 2011 |
| 14,2 | 18   | 0,6 | 3 | 2 | 18 | 2015 |
| 14,2 | 18   | 0,6 | 3 | 2 | 22 | 2015 |
| 15,8 | 24,8 | 0,6 | 5 | 2 | 23 | 2010 |
| 15,8 | 24,8 | 0,6 | 5 | 2 | 23 | 2010 |
| 11,1 | 8,6  | 0,6 | 2 | 2 | 25 | 2004 |
| 17,2 | 32   | 0,6 | 8 | 2 | 20 | 2013 |
| 17   | 30,9 | 0,6 | 9 | 2 | 24 | 2001 |
| 17   | 30,9 | 0,6 | 9 | 2 | 21 | 2014 |
| 13,3 | 14,8 | 0,6 | 2 | 2 | 24 | 2001 |
| 13,3 | 14,8 | 0,6 | 2 | 2 | 18 | 2002 |
| 13,3 | 14,8 | 0,6 | 3 | 2 | 23 | 2010 |
| 13,3 | 14,8 | 0,6 | 3 | 2 | 23 | 2010 |
| 13,3 | 14,8 | 0,6 | 2 | 2 | 22 | 2011 |
| 13,3 | 14,8 | 0,6 | 2 | 2 | 21 | 2014 |

|      |      |     |   |   |    |      |
|------|------|-----|---|---|----|------|
| 16,7 | 29,3 | 0,6 | 8 | 2 | 23 | 2002 |
| 17,6 | 34,3 | 0,6 | 6 | 2 | 20 | 2010 |
| 17,6 | 34,3 | 0,6 | 6 | 2 | 20 | 2010 |
| 14,3 | 18,4 | 0,6 | 3 | 2 | 22 | 2001 |
| 14,3 | 18,4 | 0,6 | 3 | 2 | 24 | 2001 |
| 14,3 | 18,4 | 0,6 | 5 | 2 | 22 | 2004 |
| 14,3 | 18,4 | 0,6 | 4 | 2 | 23 | 2011 |
| 14,3 | 18,4 | 0,6 | 4 | 2 | 19 | 2013 |
| 14,3 | 18,4 | 0,6 | 3 | 2 | 17 | 2014 |
| 14,3 | 18,4 | 0,6 | 3 | 2 | 18 | 2015 |
| 14,3 | 18,4 | 0,6 | 3 | 2 | 21 | 2015 |
| 13,9 | 16,9 | 0,6 | 3 | 2 | 21 | 2008 |
| 14,8 | 20,4 | 0,6 | 4 | 2 | 15 | 2015 |
| 15,2 | 22,1 | 0,6 | 5 | 2 | 21 | 2000 |
| 15,2 | 22,1 | 0,6 | 3 | 2 | 20 | 2012 |
| 15,2 | 22,1 | 0,6 | 3 | 2 | 18 | 2015 |
| 12,4 | 12   | 0,6 | 3 | 2 | 21 | 2001 |
| 12,4 | 12   | 0,6 | 2 | 2 | 26 | 2001 |
| 12,4 | 12   | 0,6 | 2 | 2 | 24 | 2006 |
| 12,4 | 12   | 0,6 | 2 | 2 | 26 | 2009 |
| 12,8 | 13,2 | 0,6 | 2 | 2 | 25 | 2007 |
| 12,8 | 13,2 | 0,6 | 2 | 2 | 19 | 2013 |
| 15,6 | 23,9 | 0,6 | 6 | 2 | 19 | 2011 |
| 14,4 | 18,8 | 0,6 | 4 | 2 | 19 | 2011 |
| 14,4 | 18,8 | 0,6 | 3 | 2 | 17 | 2014 |
| 14,4 | 18,8 | 0,6 | 3 | 2 | 19 | 2014 |
| 14,7 | 20   | 0,6 | 3 | 2 | 18 | 2001 |
| 14,7 | 20   | 0,6 | 3 | 2 | 20 | 2004 |

|      |      |     |   |   |    |      |
|------|------|-----|---|---|----|------|
| 17,3 | 32,6 | 0,6 | 3 | 2 | 17 | 2014 |
| 10,6 | 7,5  | 0,6 | 2 | 2 | 25 | 2004 |
| 15,4 | 23   | 0,6 | 4 | 2 | 18 | 2001 |
| 15,4 | 23   | 0,6 | 3 | 2 | 17 | 2014 |
| 12,5 | 12,3 | 0,6 | 2 | 2 | 18 | 2014 |
| 12,5 | 12,3 | 0,6 | 3 | 2 | 19 | 2014 |
| 12,7 | 12,9 | 0,6 | 4 | 2 | 19 | 2008 |
| 12,7 | 12,9 | 0,6 | 2 | 2 | 21 | 2011 |
| 14,5 | 19,2 | 0,6 | 3 | 2 | 18 | 1999 |
| 14,5 | 19,2 | 0,6 | 3 | 2 | 21 | 2003 |
| 14,6 | 19,6 | 0,6 | 5 | 2 | 24 | 2009 |
| 14,6 | 19,6 | 0,6 | 3 | 2 | 18 | 2014 |
| 19   | 43,2 | 0,6 | 8 | 2 | 22 | 2013 |
| 19   | 43,2 | 0,6 | 5 | 2 | 17 | 2014 |
| 16   | 25,8 | 0,6 | 6 | 2 | 18 | 2001 |
| 13,5 | 15,5 | 0,6 | 2 | 2 | 20 | 2003 |
| 13,5 | 15,5 | 0,6 | 3 | 2 | 17 | 2014 |
| 16,5 | 28,3 | 0,6 | 4 | 2 | 19 | 2013 |
| 16,5 | 28,3 | 0,6 | 4 | 2 | 15 | 2015 |
| 10   | 6,3  | 0,6 | 1 | 2 | 20 | 2004 |
| 13,7 | 16,2 | 0,6 | 4 | 2 | 20 | 2009 |
| 13,7 | 16,2 | 0,6 | 3 | 2 | 15 | 2015 |
| 16,4 | 27,8 | 0,6 | 5 | 2 | 20 | 2000 |
| 16,4 | 27,8 | 0,6 | 4 | 2 | 24 | 2001 |
| 15,1 | 21,7 | 0,6 | 3 | 2 | 18 | 2001 |
| 15,1 | 21,7 | 0,6 | 4 | 2 | 20 | 2002 |
| 15,1 | 21,7 | 0,6 | 4 | 2 | 22 | 2004 |
| 15,1 | 21,7 | 0,6 | 4 | 2 | 25 | 2004 |

|      |      |     |   |   |    |      |
|------|------|-----|---|---|----|------|
| 15,1 | 21,7 | 0,6 | 4 | 2 | 16 | 2008 |
| 18,2 | 38   | 0,6 | 4 | 2 | 17 | 2012 |
| 16,2 | 26,8 | 0,6 | 6 | 2 | 18 | 2007 |
| 16,2 | 26,8 | 0,6 | 7 | 2 | 17 | 2014 |
| 13,2 | 14,5 | 0,6 | 2 | 2 | 22 | 2000 |
| 13,2 | 14,5 | 0,6 | 2 | 2 | 19 | 2013 |
| 14   | 17,3 | 0,6 | 6 | 2 | 18 | 2000 |
| 14   | 17,3 | 0,6 | 3 | 2 | 19 | 2012 |
| 14   | 17,3 | 0,6 | 2 | 2 | 19 | 2013 |
| 11,3 | 9,1  | 0,6 | 2 | 2 | 22 | 2004 |
| 12   | 10,9 | 0,6 | 2 | 2 | 23 | 2004 |
| 12   | 10,9 | 0,6 | 2 | 2 | 21 | 2006 |
| 12   | 10,9 | 0,6 | 2 | 2 | 23 | 2007 |
| 12   | 10,9 | 0,6 | 2 | 2 | 23 | 2007 |
| 12   | 10,9 | 0,6 | 2 | 2 | 20 | 2009 |
| 12   | 10,9 | 0,6 | 2 | 2 | 22 | 2011 |
| 12   | 10,9 | 0,6 | 2 | 2 | 17 | 2014 |
| 12   | 10,9 | 0,6 | 2 | 2 | 19 | 2014 |
| 17,2 | 32,1 | 0,6 | 4 | 2 | 18 | 2015 |
| 17   | 31   | 0,6 | 6 | 2 | 22 | 2001 |
| 17   | 31   | 0,6 | 4 | 2 | 19 | 2012 |
| 17   | 31   | 0,6 | 7 | 2 | 19 | 2012 |
| 17   | 31   | 0,6 | 7 | 2 | 21 | 2014 |
| 15,3 | 22,6 | 0,6 | 4 | 2 | 19 | 1999 |
| 15,3 | 22,6 | 0,6 | 3 | 2 | 23 | 2003 |
| 15,5 | 23,5 | 0,6 | 5 | 2 | 18 | 1999 |
| 15,5 | 23,5 | 0,6 | 3 | 2 | 15 | 2015 |
| 11   | 8,4  | 0,6 | 2 | 2 | 23 | 2004 |

|      |      |     |   |   |    |      |
|------|------|-----|---|---|----|------|
| 15   | 21,3 | 0,6 | 5 | 2 | 20 | 2007 |
| 15   | 21,3 | 0,6 | 4 | 2 | 19 | 2009 |
| 15   | 21,3 | 0,6 | 4 | 2 | 19 | 2013 |
| 11,5 | 9,6  | 0,6 | 1 | 2 | 26 | 1999 |
| 11,5 | 9,6  | 0,6 | 1 | 2 | 26 | 2001 |
| 19,4 | 46,1 | 0,6 | 5 | 2 | 23 | 2010 |
| 19,4 | 46,1 | 0,6 | 5 | 2 | 23 | 2010 |
| 14,1 | 17,7 | 0,6 | 3 | 2 | 21 | 2008 |
| 13,8 | 16,6 | 0,6 | 3 | 2 | 25 | 2004 |
| 13,8 | 16,6 | 0,6 | 4 | 2 | 26 | 2006 |
| 13,8 | 16,6 | 0,6 | 3 | 2 | 18 | 2007 |
| 13,1 | 14,2 | 0,6 | 3 | 2 | 23 | 2011 |
| 13,1 | 14,2 | 0,6 | 2 | 2 | 19 | 2013 |
| 13,4 | 15,2 | 0,6 | 2 | 2 | 26 | 2001 |
| 13,4 | 15,2 | 0,6 | 2 | 2 | 25 | 2003 |
| 14,9 | 20,9 | 0,6 | 3 | 2 | 21 | 2001 |
| 14,9 | 20,9 | 0,6 | 6 | 2 | 17 | 2008 |
| 17,1 | 31,6 | 0,6 | 4 | 2 | 19 | 2000 |
| 13,6 | 15,9 | 0,6 | 3 | 2 | 22 | 2000 |
| 13,6 | 15,9 | 0,6 | 3 | 2 | 21 | 2011 |
| 14,2 | 18,1 | 0,6 | 4 | 2 | 26 | 2006 |
| 14,2 | 18,1 | 0,6 | 3 | 2 | 19 | 2014 |
| 14,2 | 18,1 | 0,6 | 3 | 2 | 15 | 2015 |
| 15,2 | 22,2 | 0,6 | 4 | 2 | 22 | 2004 |
| 15,2 | 22,2 | 0,6 | 4 | 2 | 20 | 2009 |
| 15,2 | 22,2 | 0,6 | 7 | 2 | 18 | 2015 |
| 15,6 | 24   | 0,6 | 3 | 2 | 18 | 2000 |
| 12,1 | 11,2 | 0,6 | 2 | 2 | 23 | 1999 |

|      |      |     |   |   |    |      |
|------|------|-----|---|---|----|------|
| 12,1 | 11,2 | 0,6 | 2 | 2 | 22 | 2007 |
| 12,1 | 11,2 | 0,6 | 2 | 2 | 20 | 2009 |
| 12,1 | 11,2 | 0,6 | 2 | 2 | 19 | 2014 |
| 16   | 25,9 | 0,6 | 5 | 2 | 22 | 2004 |
| 18,1 | 37,5 | 0,6 | 8 | 2 | 23 | 2002 |
| 15,4 | 23,1 | 0,6 | 5 | 2 | 21 | 1999 |
| 15,4 | 23,1 | 0,6 | 4 | 2 | 19 | 2001 |
| 15,4 | 23,1 | 0,6 | 4 | 2 | 23 | 2002 |
| 15,4 | 23,1 | 0,6 | 3 | 2 | 25 | 2003 |
| 16,1 | 26,4 | 0,6 | 3 | 2 | 20 | 2003 |
| 16,1 | 26,4 | 0,6 | 5 | 2 | 17 | 2014 |
| 14,3 | 18,5 | 0,6 | 3 | 2 | 21 | 2000 |
| 14,3 | 18,5 | 0,6 | 4 | 2 | 22 | 2011 |
| 13   | 13,9 | 0,6 | 3 | 2 | 21 | 2005 |
| 13   | 13,9 | 0,6 | 3 | 2 | 23 | 2007 |
| 13   | 13,9 | 0,6 | 3 | 2 | 25 | 2007 |
| 13   | 13,9 | 0,6 | 2 | 2 | 19 | 2013 |
| 16,3 | 27,4 | 0,6 | 5 | 2 | 18 | 1999 |
| 16,3 | 27,4 | 0,6 | 7 | 2 | 24 | 2001 |
| 16,2 | 26,9 | 0,6 | 4 | 2 | 22 | 2001 |
| 16,2 | 26,9 | 0,6 | 3 | 2 | 22 | 2001 |
| 16,2 | 26,9 | 0,6 | 4 | 2 | 18 | 2002 |
| 16,2 | 26,9 | 0,6 | 3 | 2 | 16 | 2015 |
| 14,7 | 20,1 | 0,6 | 3 | 2 | 20 | 1999 |
| 14,7 | 20,1 | 0,6 | 7 | 2 | 23 | 2004 |
| 14,4 | 18,9 | 0,6 | 4 | 2 | 25 | 2008 |
| 11,8 | 10,4 | 0,6 | 2 | 2 | 20 | 2004 |
| 13,9 | 17   | 0,6 | 5 | 2 | 25 | 2007 |

|      |      |     |   |   |    |      |
|------|------|-----|---|---|----|------|
| 13,9 | 17   | 0,6 | 3 | 2 | 21 | 2012 |
| 13,9 | 17   | 0,6 | 3 | 2 | 21 | 2014 |
| 14,6 | 19,7 | 0,6 | 4 | 2 | 19 | 2000 |
| 14,6 | 19,7 | 0,6 | 3 | 2 | 20 | 2003 |
| 14,6 | 19,7 | 0,6 | 4 | 2 | 24 | 2009 |
| 14,5 | 19,3 | 0,6 | 5 | 2 | 22 | 2000 |
| 14,5 | 19,3 | 0,6 | 3 | 2 | 20 | 2007 |
| 14,5 | 19,3 | 0,6 | 4 | 2 | 15 | 2015 |
| 15,7 | 24,5 | 0,6 | 5 | 2 | 22 | 2005 |
| 15,1 | 21,8 | 0,6 | 3 | 2 | 19 | 2001 |
| 15,1 | 21,8 | 0,6 | 4 | 2 | 23 | 2011 |
| 15,1 | 21,8 | 0,6 | 5 | 2 | 19 | 2013 |
| 13,3 | 14,9 | 0,6 | 2 | 2 | 23 | 2002 |
| 13,3 | 14,9 | 0,6 | 3 | 2 | 19 | 2008 |
| 21,1 | 59,5 | 0,6 | 6 | 2 | 17 | 2012 |
| 15,5 | 23,6 | 0,6 | 3 | 2 | 20 | 2003 |
| 15,5 | 23,6 | 0,6 | 6 | 2 | 22 | 2011 |
| 15,5 | 23,6 | 0,6 | 3 | 2 | 19 | 2015 |
| 15,5 | 23,6 | 0,6 | 3 | 2 | 19 | 2015 |
| 15,3 | 22,7 | 0,6 | 4 | 2 | 19 | 2008 |
| 15,3 | 22,7 | 0,6 | 4 | 2 | 23 | 2011 |
| 15,8 | 25   | 0,6 | 5 | 2 | 20 | 2010 |
| 15,8 | 25   | 0,6 | 5 | 2 | 20 | 2010 |
| 15,8 | 25   | 0,6 | 5 | 2 | 19 | 2012 |
| 15,8 | 25   | 0,6 | 7 | 2 | 18 | 2012 |
| 13,7 | 16,3 | 0,6 | 2 | 2 | 22 | 2000 |
| 13,7 | 16,3 | 0,6 | 3 | 2 | 25 | 2007 |
| 13,7 | 16,3 | 0,6 | 3 | 2 | 15 | 2015 |

|      |      |     |   |   |    |      |
|------|------|-----|---|---|----|------|
| 13,5 | 15,6 | 0,6 | 2 | 2 | 17 | 2002 |
| 13,5 | 15,6 | 0,6 | 4 | 2 | 21 | 2006 |
| 13,5 | 15,6 | 0,6 | 2 | 2 | 19 | 2009 |
| 13,5 | 15,6 | 0,6 | 3 | 2 | 20 | 2009 |
| 13,5 | 15,6 | 0,6 | 3 | 2 | 23 | 2009 |
| 13,5 | 15,6 | 0,6 | 2 | 2 | 19 | 2013 |
| 15   | 21,4 | 0,6 | 4 | 2 | 22 | 1999 |
| 15   | 21,4 | 0,6 | 4 | 2 | 26 | 1999 |
| 15   | 21,4 | 0,6 | 3 | 2 | 18 | 2001 |
| 15   | 21,4 | 0,6 | 4 | 2 | 23 | 2004 |
| 15   | 21,4 | 0,6 | 4 | 2 | 24 | 2006 |
| 15   | 21,4 | 0,6 | 3 | 2 | 19 | 2012 |
| 15   | 21,4 | 0,6 | 4 | 2 | 19 | 2014 |
| 15   | 21,4 | 0,6 | 4 | 2 | 15 | 2015 |
| 14   | 17,4 | 0,6 | 2 | 2 | 20 | 2000 |
| 14   | 17,4 | 0,6 | 2 | 2 | 24 | 2002 |
| 14   | 17,4 | 0,6 | 3 | 2 | 21 | 2008 |
| 14   | 17,4 | 0,6 | 2 | 2 | 19 | 2014 |
| 14   | 17,4 | 0,6 | 3 | 2 | 19 | 2015 |
| 14   | 17,4 | 0,6 | 3 | 2 | 23 | 2015 |
| 12,3 | 11,8 | 0,6 | 2 | 2 | 19 | 2002 |
| 12,3 | 11,8 | 0,6 | 2 | 2 | 26 | 2006 |
| 12,3 | 11,8 | 0,6 | 2 | 2 | 21 | 2009 |
| 12,8 | 13,3 | 0,6 | 2 | 2 | 23 | 2006 |
| 12,8 | 13,3 | 0,6 | 2 | 2 | 26 | 2006 |
| 12,8 | 13,3 | 0,6 | 2 | 2 | 19 | 2010 |
| 12,8 | 13,3 | 0,6 | 2 | 2 | 19 | 2010 |
| 11,6 | 9,9  | 0,6 | 2 | 2 | 21 | 2006 |

|      |      |     |   |   |    |      |
|------|------|-----|---|---|----|------|
| 19,7 | 48,5 | 0,6 | 6 | 2 | 19 | 2015 |
| 18   | 37   | 0,6 | 5 | 2 | 19 | 2013 |
| 11,4 | 9,4  | 0,6 | 2 | 2 | 22 | 2004 |
| 11,4 | 9,4  | 0,6 | 2 | 2 | 18 | 2007 |
| 12,4 | 12,1 | 0,6 | 2 | 2 | 23 | 1999 |
| 12,4 | 12,1 | 0,6 | 3 | 2 | 25 | 2004 |
| 12,4 | 12,1 | 0,6 | 2 | 2 | 19 | 2014 |
| 12,7 | 13   | 0,6 | 2 | 2 | 20 | 2013 |
| 12,7 | 13   | 0,6 | 2 | 2 | 18 | 2014 |
| 16   | 26   | 0,6 | 5 | 2 | 22 | 1999 |
| 16   | 26   | 0,6 | 4 | 2 | 17 | 2009 |
| 17,2 | 32,3 | 0,6 | 6 | 2 | 21 | 2013 |
| 16,4 | 28   | 0,6 | 3 | 2 | 20 | 2003 |
| 13,2 | 14,6 | 0,6 | 3 | 2 | 26 | 2003 |
| 13,2 | 14,6 | 0,6 | 3 | 2 | 21 | 2008 |
| 13,2 | 14,6 | 0,6 | 2 | 2 | 23 | 2010 |
| 13,2 | 14,6 | 0,6 | 2 | 2 | 23 | 2010 |
| 13,2 | 14,6 | 0,6 | 2 | 2 | 19 | 2013 |
| 13,2 | 14,6 | 0,6 | 2 | 2 | 17 | 2014 |
| 15,6 | 24,1 | 0,6 | 3 | 2 | 20 | 2003 |
| 14,9 | 21   | 0,6 | 5 | 2 | 22 | 1999 |
| 14,9 | 21   | 0,6 | 7 | 2 | 22 | 2007 |
| 12,5 | 12,4 | 0,6 | 2 | 2 | 19 | 2014 |
| 12,6 | 12,7 | 0,6 | 2 | 2 | 25 | 1999 |
| 12,6 | 12,7 | 0,6 | 3 | 2 | 22 | 2005 |
| 12,6 | 12,7 | 0,6 | 2 | 2 | 24 | 2006 |
| 12,6 | 12,7 | 0,6 | 2 | 2 | 21 | 2011 |
| 11,9 | 10,7 | 0,6 | 2 | 2 | 25 | 2007 |

|      |      |     |   |   |    |      |
|------|------|-----|---|---|----|------|
| 14,1 | 17,8 | 0,6 | 3 | 2 | 25 | 2007 |
| 16,1 | 26,5 | 0,6 | 4 | 2 | 19 | 2012 |
| 15,2 | 22,3 | 0,6 | 3 | 2 | 18 | 2000 |
| 15,2 | 22,3 | 0,6 | 4 | 2 | 19 | 2011 |
| 15,2 | 22,3 | 0,6 | 4 | 2 | 19 | 2012 |
| 15,2 | 22,3 | 0,6 | 3 | 2 | 20 | 2012 |
| 16,2 | 27   | 0,6 | 9 | 2 | 23 | 2004 |
| 16,2 | 27   | 0,6 | 6 | 2 | 20 | 2013 |
| 15,4 | 23,2 | 0,6 | 3 | 2 | 21 | 2003 |
| 13,8 | 16,7 | 0,6 | 4 | 2 | 24 | 2006 |
| 13,8 | 16,7 | 0,6 | 3 | 2 | 21 | 2011 |
| 13,8 | 16,7 | 0,6 | 3 | 2 | 18 | 2014 |
| 14,8 | 20,6 | 0,6 | 4 | 2 | 20 | 2001 |
| 14,2 | 18,2 | 0,6 | 5 | 2 | 23 | 1999 |
| 14,2 | 18,2 | 0,6 | 3 | 2 | 21 | 2001 |
| 14,2 | 18,2 | 0,6 | 4 | 2 | 23 | 2005 |
| 14,2 | 18,2 | 0,6 | 4 | 2 | 20 | 2012 |
| 14,2 | 18,2 | 0,6 | 3 | 2 | 19 | 2012 |
| 14,2 | 18,2 | 0,6 | 3 | 2 | 18 | 2014 |
| 14,2 | 18,2 | 0,6 | 3 | 2 | 15 | 2015 |
| 13,4 | 15,3 | 0,6 | 3 | 2 | 25 | 2004 |
| 13,4 | 15,3 | 0,6 | 3 | 2 | 22 | 2011 |
| 17,1 | 31,8 | 0,6 | 7 | 2 | 18 | 2012 |
| 17,1 | 31,8 | 0,6 | 3 | 2 | 21 | 2013 |
| 13,6 | 16   | 0,6 | 2 | 2 | 18 | 2000 |
| 13,6 | 16   | 0,6 | 3 | 2 | 20 | 2002 |
| 14,3 | 18,6 | 0,6 | 3 | 2 | 26 | 2003 |
| 14,3 | 18,6 | 0,6 | 4 | 2 | 20 | 2011 |

|      |      |     |   |   |    |      |
|------|------|-----|---|---|----|------|
| 14,3 | 18,6 | 0,6 | 3 | 2 | 15 | 2015 |
| 14,3 | 18,6 | 0,6 | 4 | 2 | 15 | 2015 |
| 15,1 | 21,9 | 0,6 | 5 | 2 | 21 | 1999 |
| 15,1 | 21,9 | 0,6 | 6 | 2 | 23 | 2006 |
| 15,1 | 21,9 | 0,6 | 3 | 2 | 18 | 2012 |
| 13,1 | 14,3 | 0,6 | 3 | 2 | 22 | 2005 |
| 13,1 | 14,3 | 0,6 | 3 | 2 | 25 | 2007 |
| 13,1 | 14,3 | 0,6 | 4 | 2 | 25 | 2007 |
| 13,1 | 14,3 | 0,6 | 3 | 2 | 20 | 2013 |
| 11,1 | 8,7  | 0,6 | 2 | 2 | 23 | 2004 |
| 16,6 | 29,1 | 0,6 | 4 | 2 | 21 | 2015 |
| 14,6 | 19,8 | 0,6 | 3 | 2 | 21 | 2008 |
| 14,4 | 19   | 0,6 | 3 | 2 | 22 | 2000 |
| 14,4 | 19   | 0,6 | 2 | 2 | 22 | 2001 |
| 14,4 | 19   | 0,6 | 4 | 2 | 24 | 2009 |
| 14,5 | 19,4 | 0,6 | 3 | 2 | 25 | 2003 |
| 15,8 | 25,1 | 0,6 | 5 | 2 | 20 | 1999 |
| 12   | 11   | 0,6 | 2 | 2 | 22 | 2007 |
| 12   | 11   | 0,6 | 2 | 2 | 23 | 2007 |
| 12   | 11   | 0,6 | 1 | 2 | 19 | 2014 |
| 15,3 | 22,8 | 0,6 | 5 | 2 | 18 | 1999 |
| 15,3 | 22,8 | 0,6 | 5 | 2 | 21 | 1999 |
| 15,3 | 22,8 | 0,6 | 4 | 2 | 24 | 2001 |
| 15,3 | 22,8 | 0,6 | 4 | 2 | 23 | 2011 |
| 15,3 | 22,8 | 0,6 | 4 | 2 | 19 | 2013 |
| 15,3 | 22,8 | 0,6 | 3 | 2 | 21 | 2015 |
| 16,5 | 28,6 | 0,6 | 4 | 2 | 19 | 2012 |
| 13,9 | 17,1 | 0,6 | 3 | 2 | 20 | 2008 |

|      |      |     |     |   |    |      |
|------|------|-----|-----|---|----|------|
| 11,7 | 10,2 | 0,6 | 2   | 2 | 21 | 2006 |
| 15   | 21,5 | 0,6 | 5   | 2 | 19 | 2000 |
| 15   | 21,5 | 0,6 | 4   | 2 | 26 | 2001 |
| 16,4 | 28,1 | 0,6 | 4   | 2 | 19 | 2000 |
| 16,4 | 28,1 | 0,6 | 5   | 2 | 20 | 2000 |
| 19   | 43,7 | 0,6 | 10+ | 2 | 17 | 2014 |
| 16   | 26,1 | 0,6 | 5   | 2 | 18 | 1999 |
| 19,1 | 44,4 | 0,6 | 7   | 2 | 17 | 2012 |
| 13   | 14   | 0,6 | 3   | 2 | 22 | 2000 |
| 13   | 14   | 0,6 | 2   | 2 | 25 | 2003 |
| 13   | 14   | 0,6 | 3   | 2 | 23 | 2008 |
| 13   | 14   | 0,6 | 2   | 2 | 26 | 2009 |
| 13   | 14   | 0,6 | 2   | 2 | 19 | 2013 |
| 13   | 14   | 0,6 | 2   | 2 | 17 | 2014 |
| 13   | 14   | 0,6 | 2   | 2 | 18 | 2014 |
| 16,3 | 27,6 | 0,6 | 4   | 2 | 24 | 2002 |
| 16,3 | 27,6 | 0,6 | 8   | 2 | 23 | 2010 |
| 16,3 | 27,6 | 0,6 | 8   | 2 | 23 | 2010 |
| 16,1 | 26,6 | 0,6 | 5   | 2 | 19 | 2000 |
| 16,1 | 26,6 | 0,6 | 3   | 2 | 21 | 2015 |
| 16,2 | 27,1 | 0,6 | 9   | 2 | 19 | 2004 |
| 16,2 | 27,1 | 0,6 | 4   | 2 | 19 | 2013 |
| 15,6 | 24,2 | 0,6 | 4   | 2 | 19 | 2014 |
| 18,1 | 37,8 | 0,6 | 4   | 2 | 18 | 2012 |
| 13,3 | 15   | 0,6 | 2   | 2 | 25 | 1999 |
| 13,3 | 15   | 0,6 | 2   | 2 | 19 | 2002 |
| 13,3 | 15   | 0,6 | 3   | 2 | 25 | 2004 |
| 13,3 | 15   | 0,6 | 3   | 2 | 23 | 2007 |

|      |      |     |   |   |    |      |
|------|------|-----|---|---|----|------|
| 13,3 | 15   | 0,6 | 2 | 2 | 23 | 2010 |
| 13,3 | 15   | 0,6 | 2 | 2 | 23 | 2010 |
| 13,3 | 15   | 0,6 | 2 | 2 | 21 | 2014 |
| 11,3 | 9,2  | 0,6 | 2 | 2 | 23 | 2004 |
| 16,7 | 29,7 | 0,6 | 5 | 2 | 20 | 2003 |
| 14   | 17,5 | 0,6 | 3 | 2 | 19 | 2001 |
| 14   | 17,5 | 0,6 | 7 | 2 | 19 | 2007 |
| 14   | 17,5 | 0,6 | 5 | 2 | 19 | 2007 |
| 13,7 | 16,4 | 0,6 | 5 | 2 | 26 | 1999 |
| 13,7 | 16,4 | 0,6 | 3 | 2 | 24 | 2009 |
| 13,7 | 16,4 | 0,6 | 4 | 2 | 23 | 2010 |
| 13,7 | 16,4 | 0,6 | 4 | 2 | 23 | 2010 |
| 13,7 | 16,4 | 0,6 | 3 | 2 | 15 | 2015 |
| 13,7 | 16,4 | 0,6 | 3 | 2 | 22 | 2015 |
| 15,2 | 22,4 | 0,6 | 3 | 2 | 18 | 2000 |
| 15,2 | 22,4 | 0,6 | 4 | 2 | 25 | 2005 |
| 15,2 | 22,4 | 0,6 | 5 | 2 | 20 | 2012 |
| 15,2 | 22,4 | 0,6 | 3 | 2 | 15 | 2015 |
| 12,1 | 11,3 | 0,6 | 2 | 2 | 20 | 2004 |
| 12,1 | 11,3 | 0,6 | 2 | 2 | 22 | 2011 |
| 14,9 | 21,1 | 0,6 | 6 | 2 | 19 | 2007 |
| 15,4 | 23,3 | 0,6 | 4 | 2 | 23 | 1999 |
| 15,4 | 23,3 | 0,6 | 4 | 2 | 22 | 2004 |
| 17,1 | 31,9 | 0,6 | 5 | 2 | 19 | 2014 |
| 13,5 | 15,7 | 0,6 | 4 | 2 | 22 | 1999 |
| 12,9 | 13,7 | 0,6 | 2 | 2 | 19 | 2002 |
| 12,9 | 13,7 | 0,6 | 2 | 2 | 17 | 2014 |
| 15,7 | 24,7 | 0,6 | 6 | 2 | 22 | 2011 |

|      |      |     |   |   |    |      |
|------|------|-----|---|---|----|------|
| 15,7 | 24,7 | 0,6 | 4 | 2 | 19 | 2015 |
| 19,7 | 48,8 | 0,6 | 5 | 2 | 19 | 2013 |
| 16,6 | 29,2 | 0,6 | 5 | 2 | 19 | 2012 |
| 14,8 | 20,7 | 0,6 | 5 | 2 | 19 | 2007 |
| 14,8 | 20,7 | 0,6 | 4 | 2 | 19 | 2008 |
| 14,1 | 17,9 | 0,6 | 3 | 2 | 20 | 2008 |
| 14,1 | 17,9 | 0,6 | 4 | 2 | 19 | 2011 |
| 14,1 | 17,9 | 0,6 | 3 | 2 | 15 | 2015 |
| 11   | 8,5  | 0,6 | 2 | 2 | 23 | 2004 |
| 19,1 | 44,5 | 0,6 | 7 | 2 | 19 | 2012 |
| 17,2 | 32,5 | 0,6 | 5 | 2 | 17 | 2012 |
| 12,2 | 11,6 | 0,6 | 2 | 2 | 18 | 2014 |
| 15,8 | 25,2 | 0,6 | 3 | 2 | 19 | 2014 |
| 16,5 | 28,7 | 0,6 | 7 | 2 | 23 | 2004 |
| 16,5 | 28,7 | 0,6 | 5 | 2 | 19 | 2010 |
| 16,5 | 28,7 | 0,6 | 5 | 2 | 19 | 2010 |
| 12,8 | 13,4 | 0,6 | 2 | 2 | 23 | 2006 |
| 12,8 | 13,4 | 0,6 | 3 | 2 | 23 | 2007 |
| 12,8 | 13,4 | 0,6 | 3 | 2 | 19 | 2009 |
| 12,8 | 13,4 | 0,6 | 2 | 2 | 20 | 2013 |
| 12,8 | 13,4 | 0,6 | 2 | 2 | 17 | 2014 |
| 15,1 | 22   | 0,6 | 4 | 2 | 21 | 1999 |
| 15,1 | 22   | 0,6 | 4 | 2 | 20 | 2000 |
| 15,1 | 22   | 0,6 | 4 | 2 | 20 | 2003 |
| 15,1 | 22   | 0,6 | 3 | 2 | 21 | 2003 |
| 15,1 | 22   | 0,6 | 6 | 2 | 20 | 2011 |
| 15,1 | 22   | 0,6 | 4 | 2 | 19 | 2013 |
| 16,8 | 30,3 | 0,6 | 5 | 2 | 19 | 2013 |

|      |      |     |   |   |    |      |
|------|------|-----|---|---|----|------|
| 11,8 | 10,5 | 0,6 | 3 | 2 | 20 | 2004 |
| 14,7 | 20,3 | 0,6 | 3 | 2 | 21 | 2003 |
| 15,5 | 23,8 | 0,6 | 3 | 2 | 22 | 2001 |
| 15,5 | 23,8 | 0,6 | 3 | 2 | 20 | 2003 |
| 14,2 | 18,3 | 0,6 | 3 | 2 | 20 | 2006 |
| 14,2 | 18,3 | 0,6 | 6 | 2 | 26 | 2006 |
| 14,2 | 18,3 | 0,6 | 3 | 2 | 21 | 2011 |
| 14,2 | 18,3 | 0,6 | 6 | 2 | 19 | 2013 |
| 13,2 | 14,7 | 0,6 | 2 | 2 | 20 | 2002 |
| 13,2 | 14,7 | 0,6 | 4 | 2 | 26 | 2006 |
| 13,2 | 14,7 | 0,6 | 3 | 2 | 20 | 2009 |
| 13,2 | 14,7 | 0,6 | 2 | 2 | 17 | 2014 |
| 13,8 | 16,8 | 0,6 | 2 | 2 | 26 | 2001 |
| 13,8 | 16,8 | 0,6 | 2 | 2 | 21 | 2015 |
| 16,4 | 28,2 | 0,6 | 3 | 2 | 19 | 2012 |
| 15,9 | 25,7 | 0,6 | 4 | 2 | 18 | 1999 |
| 15,9 | 25,7 | 0,6 | 4 | 2 | 22 | 2013 |
| 15,3 | 22,9 | 0,6 | 3 | 2 | 18 | 2000 |
| 15,3 | 22,9 | 0,6 | 3 | 2 | 22 | 2003 |
| 15,3 | 22,9 | 0,6 | 4 | 2 | 24 | 2006 |
| 15,3 | 22,9 | 0,6 | 5 | 2 | 18 | 2007 |
| 15,3 | 22,9 | 0,6 | 4 | 2 | 15 | 2015 |
| 14,6 | 19,9 | 0,6 | 4 | 2 | 20 | 2004 |
| 14,6 | 19,9 | 0,6 | 3 | 2 | 21 | 2014 |
| 12,3 | 11,9 | 0,6 | 2 | 2 | 19 | 2002 |
| 12,3 | 11,9 | 0,6 | 2 | 2 | 22 | 2007 |
| 12,3 | 11,9 | 0,6 | 2 | 2 | 23 | 2007 |
| 14,3 | 18,7 | 0,6 | 4 | 2 | 20 | 2006 |

|      |      |     |   |   |    |      |
|------|------|-----|---|---|----|------|
| 14,3 | 18,7 | 0,6 | 4 | 2 | 23 | 2008 |
| 14,3 | 18,7 | 0,6 | 4 | 2 | 20 | 2011 |
| 14,3 | 18,7 | 0,6 | 3 | 2 | 15 | 2015 |
| 14,3 | 18,7 | 0,6 | 3 | 2 | 21 | 2015 |
| 12,7 | 13,1 | 0,6 | 2 | 2 | 18 | 2000 |
| 12,7 | 13,1 | 0,6 | 2 | 2 | 22 | 2009 |
| 16,3 | 27,7 | 0,6 | 7 | 2 | 23 | 1999 |
| 14,5 | 19,5 | 0,6 | 4 | 2 | 27 | 1999 |
| 14,5 | 19,5 | 0,6 | 2 | 2 | 20 | 2000 |
| 14,5 | 19,5 | 0,6 | 3 | 2 | 19 | 2000 |
| 14,5 | 19,5 | 0,6 | 3 | 2 | 19 | 2014 |
| 14,5 | 19,5 | 0,6 | 4 | 2 | 16 | 2015 |
| 14,5 | 19,5 | 0,6 | 4 | 2 | 21 | 2015 |
| 16   | 26,2 | 0,6 | 5 | 2 | 19 | 2000 |
| 16   | 26,2 | 0,6 | 6 | 2 | 19 | 2011 |
| 14,4 | 19,1 | 0,6 | 5 | 2 | 23 | 1999 |
| 14,4 | 19,1 | 0,6 | 3 | 2 | 22 | 2001 |
| 14,4 | 19,1 | 0,6 | 3 | 2 | 23 | 2003 |
| 14,4 | 19,1 | 0,6 | 6 | 2 | 23 | 2008 |
| 16,1 | 26,7 | 0,6 | 5 | 2 | 19 | 2013 |
| 16,1 | 26,7 | 0,6 | 7 | 2 | 22 | 2013 |
| 12,4 | 12,2 | 0,6 | 2 | 2 | 24 | 2006 |
| 12,4 | 12,2 | 0,6 | 2 | 2 | 23 | 2011 |
| 12,4 | 12,2 | 0,6 | 2 | 2 | 23 | 2011 |
| 12,4 | 12,2 | 0,6 | 2 | 2 | 18 | 2014 |
| 12,6 | 12,8 | 0,6 | 2 | 2 | 18 | 2000 |
| 12,6 | 12,8 | 0,6 | 3 | 2 | 19 | 2006 |
| 17,9 | 36,7 | 0,6 | 6 | 2 | 18 | 2012 |

|      |      |     |   |   |    |      |
|------|------|-----|---|---|----|------|
| 17,1 | 32   | 0,6 | 5 | 2 | 18 | 2000 |
| 15   | 21,6 | 0,6 | 5 | 2 | 23 | 1999 |
| 15   | 21,6 | 0,6 | 4 | 2 | 27 | 1999 |
| 12,5 | 12,5 | 0,6 | 2 | 2 | 20 | 2002 |
| 12,5 | 12,5 | 0,6 | 3 | 2 | 22 | 2005 |
| 12,5 | 12,5 | 0,6 | 2 | 2 | 25 | 2007 |
| 15   | 21,6 | 0,6 | 5 | 2 | 19 | 2007 |
| 15   | 21,6 | 0,6 | 3 | 2 | 18 | 2012 |
| 15   | 21,6 | 0,6 | 3 | 2 | 19 | 2012 |
| 12,5 | 12,5 | 0,6 | 2 | 2 | 19 | 2014 |
| 15   | 21,6 | 0,6 | 3 | 2 | 21 | 2015 |
| 13,4 | 15,4 | 0,6 | 3 | 2 | 21 | 2005 |
| 13,4 | 15,4 | 0,6 | 3 | 2 | 21 | 2005 |
| 13,4 | 15,4 | 0,6 | 2 | 2 | 19 | 2006 |
| 13,4 | 15,4 | 0,6 | 3 | 2 | 23 | 2009 |
| 13,4 | 15,4 | 0,6 | 2 | 2 | 26 | 2009 |
| 13,4 | 15,4 | 0,6 | 2 | 2 | 19 | 2013 |
| 13,4 | 15,4 | 0,6 | 3 | 2 | 22 | 2015 |
| 13,6 | 16,1 | 0,6 | 2 | 2 | 20 | 2000 |
| 13,6 | 16,1 | 0,6 | 2 | 2 | 22 | 2000 |
| 13,6 | 16,1 | 0,6 | 2 | 2 | 26 | 2000 |
| 13,6 | 16,1 | 0,6 | 5 | 2 | 26 | 2000 |
| 13,6 | 16,1 | 0,6 | 5 | 2 | 21 | 2005 |
| 13,6 | 16,1 | 0,6 | 2 | 2 | 25 | 2008 |
| 15,6 | 24,3 | 0,6 | 4 | 2 | 15 | 2015 |
| 13,9 | 17,2 | 0,6 | 3 | 2 | 21 | 2008 |
| 13,1 | 14,4 | 0,6 | 3 | 2 | 23 | 2005 |
| 13,1 | 14,4 | 0,6 | 4 | 2 | 23 | 2006 |

|      |      |     |   |   |    |      |
|------|------|-----|---|---|----|------|
| 13,1 | 14,4 | 0,6 | 2 | 2 | 26 | 2006 |
| 13,1 | 14,4 | 0,6 | 2 | 2 | 23 | 2007 |
| 13,1 | 14,4 | 0,6 | 3 | 2 | 20 | 2008 |
| 13,1 | 14,4 | 0,6 | 2 | 2 | 25 | 2008 |
| 13,1 | 14,4 | 0,6 | 2 | 2 | 24 | 2009 |
| 13,1 | 14,4 | 0,6 | 2 | 2 | 21 | 2014 |
| 11,2 | 9    | 0,6 | 2 | 2 | 25 | 2004 |
| 11,6 | 10   | 0,6 | 2 | 2 | 20 | 2004 |
| 15,2 | 22,5 | 0,6 | 4 | 2 | 21 | 2015 |
| 18,1 | 38   | 0,6 | 5 | 2 | 19 | 2013 |
| 14,9 | 21,2 | 0,6 | 4 | 2 | 20 | 2001 |
| 10,9 | 8,3  | 0,6 | 2 | 2 | 23 | 2004 |
| 16,8 | 30,4 | 0,6 | 6 | 2 | 20 | 2013 |
| 17,3 | 33,2 | 0,6 | 6 | 2 | 20 | 2002 |
| 17,3 | 33,2 | 0,6 | 5 | 2 | 19 | 2013 |
| 11,4 | 9,5  | 0,6 | 2 | 2 | 23 | 2004 |
| 14   | 17,6 | 0,6 | 3 | 2 | 23 | 2005 |
| 14   | 17,6 | 0,6 | 4 | 2 | 24 | 2006 |
| 14   | 17,6 | 0,6 | 4 | 2 | 23 | 2009 |
| 14   | 17,6 | 0,6 | 2 | 2 | 19 | 2013 |
| 14   | 17,6 | 0,6 | 3 | 2 | 20 | 2013 |
| 14   | 17,6 | 0,6 | 3 | 2 | 17 | 2014 |
| 14,8 | 20,8 | 0,6 | 4 | 2 | 20 | 1999 |
| 13,7 | 16,5 | 0,6 | 5 | 2 | 19 | 1999 |
| 13,7 | 16,5 | 0,6 | 3 | 2 | 22 | 2011 |
| 13   | 14,1 | 0,6 | 2 | 2 | 18 | 2002 |
| 13   | 14,1 | 0,6 | 5 | 2 | 26 | 2006 |
| 13   | 14,1 | 0,6 | 2 | 2 | 19 | 2013 |

|      |      |     |   |   |    |      |
|------|------|-----|---|---|----|------|
| 13   | 14,1 | 0,6 | 2 | 2 | 19 | 2013 |
| 15,5 | 23,9 | 0,6 | 3 | 2 | 20 | 2003 |
| 15,5 | 23,9 | 0,6 | 5 | 2 | 21 | 2012 |
| 13,3 | 15,1 | 0,6 | 2 | 2 | 21 | 2000 |
| 13,3 | 15,1 | 0,6 | 2 | 2 | 18 | 2002 |
| 13,3 | 15,1 | 0,6 | 3 | 2 | 20 | 2007 |
| 13,3 | 15,1 | 0,6 | 2 | 2 | 24 | 2009 |
| 13,3 | 15,1 | 0,6 | 2 | 2 | 19 | 2013 |
| 13,3 | 15,1 | 0,6 | 2 | 2 | 17 | 2014 |
| 17,5 | 34,4 | 0,6 | 8 | 2 | 18 | 2015 |
| 15,1 | 22,1 | 0,6 | 3 | 2 | 18 | 2015 |
| 20,5 | 55,3 | 0,6 | 6 | 2 | 19 | 2013 |
| 14,1 | 18   | 0,6 | 2 | 2 | 27 | 1999 |
| 14,1 | 18   | 0,6 | 3 | 2 | 21 | 2012 |
| 16,2 | 27,3 | 0,6 | 5 | 2 | 18 | 2000 |
| 16,2 | 27,3 | 0,6 | 4 | 2 | 17 | 2014 |
| 15,3 | 23   | 0,6 | 4 | 2 | 23 | 2003 |
| 15,3 | 23   | 0,6 | 4 | 2 | 21 | 2005 |
| 15,3 | 23   | 0,6 | 7 | 2 | 17 | 2009 |
| 13,5 | 15,8 | 0,6 | 2 | 2 | 24 | 2001 |
| 13,5 | 15,8 | 0,6 | 2 | 2 | 23 | 2002 |
| 13,5 | 15,8 | 0,6 | 3 | 2 | 19 | 2008 |
| 13,5 | 15,8 | 0,6 | 3 | 2 | 15 | 2015 |
| 14,7 | 20,4 | 0,6 | 4 | 2 | 22 | 1999 |
| 14,7 | 20,4 | 0,6 | 2 | 2 | 26 | 2001 |
| 14,7 | 20,4 | 0,6 | 3 | 2 | 24 | 2002 |
| 14,7 | 20,4 | 0,6 | 3 | 2 | 23 | 2003 |
| 12   | 11,1 | 0,6 | 2 | 2 | 23 | 2006 |

|      |      |     |   |   |    |      |
|------|------|-----|---|---|----|------|
| 12   | 11,1 | 0,6 | 3 | 2 | 22 | 2007 |
| 12   | 11,1 | 0,6 | 2 | 2 | 23 | 2007 |
| 12   | 11,1 | 0,6 | 2 | 2 | 25 | 2007 |
| 12   | 11,1 | 0,6 | 2 | 2 | 22 | 2011 |
| 14,2 | 18,4 | 0,6 | 3 | 2 | 17 | 2012 |
| 14,6 | 20   | 0,6 | 4 | 2 | 23 | 2011 |
| 15,6 | 24,4 | 0,6 | 3 | 2 | 19 | 2001 |
| 14,3 | 18,8 | 0,6 | 2 | 2 | 19 | 2000 |
| 14,3 | 18,8 | 0,6 | 3 | 2 | 22 | 2003 |
| 14,3 | 18,8 | 0,6 | 4 | 2 | 22 | 2011 |
| 14,3 | 18,8 | 0,6 | 4 | 2 | 21 | 2013 |
| 14,5 | 19,6 | 0,6 | 3 | 2 | 26 | 2000 |
| 14,5 | 19,6 | 0,6 | 3 | 2 | 17 | 2008 |
| 14,5 | 19,6 | 0,6 | 4 | 2 | 21 | 2009 |
| 14,5 | 19,6 | 0,6 | 4 | 2 | 19 | 2012 |
| 19,1 | 44,8 | 0,6 | 7 | 2 | 18 | 2012 |
| 15   | 21,7 | 0,6 | 3 | 2 | 20 | 2001 |
| 15   | 21,7 | 0,6 | 4 | 2 | 23 | 2004 |
| 15   | 21,7 | 0,6 | 3 | 2 | 17 | 2014 |
| 15   | 21,7 | 0,6 | 3 | 2 | 15 | 2015 |
| 14,4 | 19,2 | 0,6 | 4 | 2 | 26 | 2006 |
| 10,8 | 8,1  | 0,6 | 2 | 2 | 20 | 2007 |
| 13,8 | 16,9 | 0,6 | 4 | 2 | 23 | 2004 |
| 13,8 | 16,9 | 0,6 | 4 | 2 | 21 | 2006 |
| 13,8 | 16,9 | 0,6 | 3 | 2 | 25 | 2008 |
| 11,7 | 10,3 | 0,6 | 1 | 2 | 26 | 2001 |
| 11,7 | 10,3 | 0,6 | 2 | 2 | 25 | 2004 |
| 17   | 31,6 | 0,6 | 4 | 2 | 19 | 2012 |

|      |      |     |   |   |    |      |
|------|------|-----|---|---|----|------|
| 16,5 | 28,9 | 0,6 | 4 | 2 | 22 | 2003 |
| 16,5 | 28,9 | 0,6 | 7 | 2 | 24 | 2009 |
| 16,5 | 28,9 | 0,6 | 5 | 2 | 21 | 2014 |
| 15,7 | 24,9 | 0,6 | 5 | 2 | 25 | 2003 |
| 15,7 | 24,9 | 0,6 | 4 | 2 | 19 | 2011 |
| 15,4 | 23,5 | 0,6 | 5 | 2 | 20 | 2007 |
| 11,1 | 8,8  | 0,6 | 2 | 2 | 23 | 2004 |
| 13,2 | 14,8 | 0,6 | 2 | 2 | 25 | 1999 |
| 13,2 | 14,8 | 0,6 | 2 | 2 | 22 | 2000 |
| 13,2 | 14,8 | 0,6 | 3 | 2 | 20 | 2008 |
| 13,2 | 14,8 | 0,6 | 3 | 2 | 20 | 2008 |
| 12,1 | 11,4 | 0,6 | 2 | 2 | 26 | 2005 |
| 12,1 | 11,4 | 0,6 | 2 | 2 | 19 | 2011 |
| 12,1 | 11,4 | 0,6 | 2 | 2 | 21 | 2011 |
| 15,2 | 22,6 | 0,6 | 3 | 2 | 22 | 2000 |
| 15,2 | 22,6 | 0,6 | 5 | 2 | 17 | 2009 |
| 15,2 | 22,6 | 0,6 | 3 | 2 | 21 | 2013 |
| 12,8 | 13,5 | 0,6 | 3 | 2 | 22 | 2004 |
| 12,8 | 13,5 | 0,6 | 2 | 2 | 23 | 2007 |
| 12,8 | 13,5 | 0,6 | 2 | 2 | 21 | 2014 |
| 20   | 51,5 | 0,6 | 5 | 2 | 20 | 2013 |
| 14,9 | 21,3 | 0,6 | 4 | 2 | 21 | 2006 |
| 14,9 | 21,3 | 0,6 | 5 | 2 | 19 | 2012 |
| 15,8 | 25,4 | 0,6 | 4 | 2 | 20 | 2003 |
| 15,8 | 25,4 | 0,6 | 5 | 2 | 23 | 2005 |
| 15,8 | 25,4 | 0,6 | 3 | 2 | 18 | 2008 |
| 15,8 | 25,4 | 0,6 | 4 | 2 | 18 | 2015 |
| 13,6 | 16,2 | 0,6 | 3 | 2 | 21 | 2009 |

|      |      |     |   |   |    |      |
|------|------|-----|---|---|----|------|
| 13,6 | 16,2 | 0,6 | 2 | 2 | 20 | 2013 |
| 13,6 | 16,2 | 0,6 | 2 | 2 | 21 | 2014 |
| 13,6 | 16,2 | 0,6 | 2 | 2 | 23 | 2014 |
| 18,8 | 42,8 | 0,6 | 7 | 2 | 21 | 2014 |
| 16,7 | 30   | 0,6 | 4 | 2 | 22 | 2000 |
| 19,6 | 48,5 | 0,6 | 8 | 2 | 22 | 2013 |
| 13,9 | 17,3 | 0,6 | 3 | 2 | 23 | 1999 |
| 13,9 | 17,3 | 0,6 | 3 | 2 | 25 | 2005 |
| 13,4 | 15,5 | 0,6 | 3 | 2 | 24 | 2002 |
| 13,4 | 15,5 | 0,6 | 2 | 2 | 24 | 2002 |
| 13,4 | 15,5 | 0,6 | 2 | 2 | 17 | 2014 |
| 16,3 | 27,9 | 0,6 | 7 | 2 | 19 | 2014 |
| 12,2 | 11,7 | 0,6 | 2 | 2 | 19 | 2013 |
| 12,2 | 11,7 | 0,6 | 2 | 2 | 19 | 2013 |
| 11,5 | 9,8  | 0,6 | 2 | 2 | 20 | 2002 |
| 12,7 | 13,2 | 0,6 | 2 | 2 | 20 | 2002 |
| 12,7 | 13,2 | 0,6 | 2 | 2 | 20 | 2004 |
| 12,7 | 13,2 | 0,6 | 2 | 2 | 23 | 2009 |
| 12,7 | 13,2 | 0,6 | 2 | 2 | 17 | 2014 |
| 16,1 | 26,9 | 0,6 | 7 | 2 | 21 | 2012 |
| 17,2 | 32,8 | 0,6 | 6 | 2 | 20 | 2013 |
| 14,8 | 20,9 | 0,6 | 5 | 2 | 19 | 2007 |
| 14,8 | 20,9 | 0,6 | 3 | 2 | 19 | 2012 |
| 18   | 37,6 | 0,6 | 4 | 2 | 19 | 2013 |
| 15,1 | 22,2 | 0,6 | 5 | 2 | 19 | 1999 |
| 15,1 | 22,2 | 0,6 | 5 | 2 | 21 | 2006 |
| 12,3 | 12   | 0,6 | 2 | 2 | 20 | 2013 |
| 12,3 | 12   | 0,6 | 2 | 2 | 19 | 2014 |

|      |      |     |   |   |    |      |
|------|------|-----|---|---|----|------|
| 10,7 | 7,9  | 0,6 | 2 | 2 | 20 | 2004 |
| 12,6 | 12,9 | 0,6 | 2 | 2 | 23 | 2002 |
| 16,6 | 29,5 | 0,6 | 7 | 2 | 19 | 2012 |
| 13,1 | 14,5 | 0,6 | 2 | 2 | 20 | 2002 |
| 13,1 | 14,5 | 0,6 | 3 | 2 | 21 | 2008 |
| 13,1 | 14,5 | 0,6 | 2 | 2 | 19 | 2013 |
| 20   | 51,6 | 0,6 | 5 | 2 | 17 | 2014 |
| 14   | 17,7 | 0,6 | 3 | 2 | 19 | 2013 |
| 14   | 17,7 | 0,6 | 3 | 2 | 17 | 2014 |
| 14   | 17,7 | 0,6 | 3 | 2 | 19 | 2015 |
| 12,4 | 12,3 | 0,6 | 3 | 2 | 21 | 2005 |
| 12,4 | 12,3 | 0,6 | 3 | 2 | 22 | 2005 |
| 12,5 | 12,6 | 0,6 | 3 | 2 | 23 | 2005 |
| 12,5 | 12,6 | 0,6 | 3 | 2 | 25 | 2005 |
| 12,5 | 12,6 | 0,6 | 2 | 2 | 25 | 2007 |
| 11,8 | 10,6 | 0,6 | 1 | 2 | 26 | 2001 |
| 11,8 | 10,6 | 0,6 | 3 | 2 | 26 | 2006 |
| 11,8 | 10,6 | 0,6 | 2 | 2 | 23 | 2007 |
| 18,7 | 42,2 | 0,6 | 8 | 2 | 20 | 2010 |
| 18,7 | 42,2 | 0,6 | 8 | 2 | 20 | 2010 |
| 15,6 | 24,5 | 0,6 | 3 | 2 | 25 | 2003 |
| 15,6 | 24,5 | 0,6 | 5 | 2 | 23 | 2005 |
| 14,7 | 20,5 | 0,6 | 3 | 2 | 23 | 2003 |
| 14,7 | 20,5 | 0,6 | 5 | 2 | 26 | 2006 |
| 16,5 | 29   | 0,6 | 7 | 2 | 21 | 2014 |
| 13,7 | 16,6 | 0,6 | 2 | 2 | 24 | 2002 |
| 13,7 | 16,6 | 0,6 | 4 | 2 | 24 | 2002 |
| 13,7 | 16,6 | 0,6 | 3 | 2 | 22 | 2005 |

|      |      |     |   |   |    |      |
|------|------|-----|---|---|----|------|
| 14,1 | 18,1 | 0,6 | 4 | 2 | 20 | 2011 |
| 14,1 | 18,1 | 0,6 | 3 | 2 | 22 | 2015 |
| 15   | 21,8 | 0,6 | 4 | 2 | 23 | 1999 |
| 15   | 21,8 | 0,6 | 5 | 2 | 19 | 2000 |
| 15   | 21,8 | 0,6 | 3 | 2 | 22 | 2004 |
| 15   | 21,8 | 0,6 | 3 | 2 | 18 | 2015 |
| 15,7 | 25   | 0,6 | 5 | 2 | 26 | 2000 |
| 15,7 | 25   | 0,6 | 4 | 2 | 16 | 2015 |
| 13,3 | 15,2 | 0,6 | 2 | 2 | 21 | 2000 |
| 13,3 | 15,2 | 0,6 | 4 | 2 | 23 | 2009 |
| 14,2 | 18,5 | 0,6 | 3 | 2 | 24 | 2002 |
| 16,4 | 28,5 | 0,6 | 5 | 2 | 21 | 2015 |
| 15,4 | 23,6 | 0,6 | 5 | 2 | 20 | 1999 |
| 15,4 | 23,6 | 0,6 | 4 | 2 | 23 | 2003 |
| 14,5 | 19,7 | 0,6 | 7 | 2 | 25 | 2002 |
| 14,5 | 19,7 | 0,6 | 2 | 2 | 20 | 2003 |
| 14,5 | 19,7 | 0,6 | 4 | 2 | 24 | 2009 |
| 14,5 | 19,7 | 0,6 | 3 | 2 | 19 | 2012 |
| 14,5 | 19,7 | 0,6 | 4 | 2 | 18 | 2012 |
| 14,5 | 19,7 | 0,6 | 4 | 2 | 15 | 2015 |
| 13,5 | 15,9 | 0,6 | 3 | 2 | 23 | 2015 |
| 14,3 | 18,9 | 0,6 | 4 | 2 | 23 | 2009 |
| 14,3 | 18,9 | 0,6 | 2 | 2 | 21 | 2013 |
| 13   | 14,2 | 0,6 | 3 | 2 | 23 | 2008 |
| 13   | 14,2 | 0,6 | 2 | 2 | 19 | 2012 |
| 13   | 14,2 | 0,6 | 2 | 2 | 20 | 2013 |
| 14,4 | 19,3 | 0,6 | 2 | 2 | 19 | 2000 |
| 14,4 | 19,3 | 0,6 | 5 | 2 | 21 | 2000 |

|      |      |     |   |   |    |      |
|------|------|-----|---|---|----|------|
| 14,4 | 19,3 | 0,6 | 4 | 2 | 15 | 2015 |
| 15,2 | 22,7 | 0,6 | 4 | 2 | 16 | 2008 |
| 18,6 | 41,6 | 0,6 | 4 | 2 | 19 | 2012 |
| 16,3 | 28   | 0,6 | 5 | 2 | 21 | 2000 |
| 16,3 | 28   | 0,6 | 7 | 2 | 21 | 2006 |
| 16,3 | 28   | 0,6 | 4 | 2 | 17 | 2012 |
| 16,2 | 27,5 | 0,6 | 4 | 2 | 18 | 2001 |
| 13,8 | 17   | 0,6 | 3 | 2 | 19 | 2012 |
| 14,9 | 21,4 | 0,6 | 5 | 2 | 25 | 2007 |
| 14,9 | 21,4 | 0,6 | 5 | 2 | 25 | 2007 |
| 14,9 | 21,4 | 0,6 | 3 | 2 | 22 | 2015 |
| 16   | 26,5 | 0,6 | 8 | 2 | 18 | 2008 |
| 16,1 | 27   | 0,6 | 7 | 2 | 25 | 1999 |
| 16,1 | 27   | 0,6 | 4 | 2 | 17 | 2009 |
| 17,3 | 33,5 | 0,6 | 5 | 2 | 19 | 2010 |
| 17,3 | 33,5 | 0,6 | 5 | 2 | 19 | 2010 |
| 11,6 | 10,1 | 0,6 | 2 | 2 | 22 | 2007 |
| 15,5 | 24,1 | 0,6 | 3 | 2 | 25 | 2003 |
| 15,5 | 24,1 | 0,6 | 4 | 2 | 19 | 2007 |
| 15,5 | 24,1 | 0,6 | 3 | 2 | 18 | 2014 |
| 19   | 44,4 | 0,6 | 6 | 2 | 15 | 2015 |
| 16,8 | 30,7 | 0,6 | 4 | 2 | 20 | 2013 |
| 17,5 | 34,7 | 0,6 | 5 | 2 | 19 | 2012 |
| 15,1 | 22,3 | 0,6 | 3 | 2 | 21 | 2001 |
| 15,1 | 22,3 | 0,6 | 4 | 2 | 19 | 2012 |
| 20,1 | 52,6 | 0,6 | 5 | 2 | 19 | 2010 |
| 20,1 | 52,6 | 0,6 | 5 | 2 | 19 | 2010 |
| 15,3 | 23,2 | 0,6 | 5 | 2 | 19 | 2000 |

|      |      |     |    |   |    |      |
|------|------|-----|----|---|----|------|
| 15,3 | 23,2 | 0,6 | 3  | 2 | 18 | 2008 |
| 15,3 | 23,2 | 0,6 | 4  | 2 | 22 | 2015 |
| 14,8 | 21   | 0,6 | 4  | 2 | 21 | 2006 |
| 14,8 | 21   | 0,6 | 10 | 2 | 19 | 2013 |
| 13,2 | 14,9 | 0,6 | 2  | 2 | 20 | 2000 |
| 13,2 | 14,9 | 0,6 | 2  | 2 | 23 | 2002 |
| 13,2 | 14,9 | 0,6 | 5  | 2 | 22 | 2005 |
| 13,2 | 14,9 | 0,6 | 3  | 2 | 21 | 2008 |
| 13,2 | 14,9 | 0,6 | 3  | 2 | 19 | 2009 |
| 13,2 | 14,9 | 0,6 | 2  | 2 | 19 | 2013 |
| 13,2 | 14,9 | 0,6 | 2  | 2 | 17 | 2014 |
| 13,2 | 14,9 | 0,6 | 2  | 2 | 18 | 2014 |
| 10,5 | 7,5  | 0,6 | 1  | 2 | 22 | 2009 |
| 11,4 | 9,6  | 0,6 | 2  | 2 | 20 | 2004 |
| 11,4 | 9,6  | 0,6 | 2  | 2 | 23 | 2004 |
| 15,6 | 24,6 | 0,6 | 5  | 2 | 18 | 2000 |
| 15,6 | 24,6 | 0,6 | 5  | 2 | 20 | 2012 |
| 13,6 | 16,3 | 0,6 | 2  | 2 | 18 | 2002 |
| 13,6 | 16,3 | 0,6 | 3  | 2 | 22 | 2015 |
| 12   | 11,2 | 0,6 | 2  | 2 | 20 | 2002 |
| 12   | 11,2 | 0,6 | 5  | 2 | 23 | 2007 |
| 12   | 11,2 | 0,6 | 2  | 2 | 23 | 2007 |
| 12   | 11,2 | 0,6 | 2  | 2 | 23 | 2007 |
| 13,4 | 15,6 | 0,6 | 3  | 2 | 23 | 2011 |
| 16,7 | 30,2 | 0,6 | 6  | 2 | 21 | 2011 |
| 19,9 | 51,1 | 0,6 | 5  | 2 | 17 | 2014 |
| 12,8 | 13,6 | 0,6 | 2  | 2 | 21 | 2000 |
| 14,7 | 20,6 | 0,6 | 3  | 2 | 22 | 2003 |

|      |      |     |   |   |    |      |
|------|------|-----|---|---|----|------|
| 14,7 | 20,6 | 0,6 | 4 | 2 | 21 | 2011 |
| 14,7 | 20,6 | 0,6 | 3 | 2 | 18 | 2015 |
| 15,7 | 25,1 | 0,6 | 5 | 2 | 23 | 1999 |
| 15,7 | 25,1 | 0,6 | 4 | 2 | 24 | 2002 |
| 21,8 | 67,2 | 0,6 | 8 | 2 | 17 | 2012 |
| 18,8 | 43,1 | 0,6 | 6 | 2 | 21 | 2013 |
| 14   | 17,8 | 0,6 | 2 | 2 | 21 | 2008 |
| 14   | 17,8 | 0,6 | 4 | 2 | 19 | 2009 |
| 14   | 17,8 | 0,6 | 5 | 2 | 19 | 2012 |
| 14   | 17,8 | 0,6 | 3 | 2 | 17 | 2014 |
| 19   | 44,5 | 0,6 | 7 | 2 | 18 | 2015 |
| 15   | 21,9 | 0,6 | 4 | 2 | 22 | 1999 |
| 15   | 21,9 | 0,6 | 5 | 2 | 24 | 2002 |
| 15   | 21,9 | 0,6 | 4 | 2 | 22 | 2004 |
| 15   | 21,9 | 0,6 | 3 | 2 | 22 | 2004 |
| 15   | 21,9 | 0,6 | 4 | 2 | 18 | 2012 |
| 15   | 21,9 | 0,6 | 3 | 2 | 18 | 2012 |
| 15   | 21,9 | 0,6 | 4 | 2 | 19 | 2012 |
| 15   | 21,9 | 0,6 | 4 | 2 | 21 | 2012 |
| 15   | 21,9 | 0,6 | 3 | 2 | 20 | 2013 |
| 15   | 21,9 | 0,6 | 3 | 2 | 21 | 2014 |
| 15,4 | 23,7 | 0,6 | 5 | 2 | 19 | 2012 |
| 17,8 | 36,6 | 0,6 | 8 | 2 | 20 | 2003 |
| 10,4 | 7,3  | 0,6 | 2 | 2 | 25 | 2004 |
| 20,8 | 58,4 | 0,6 | 7 | 2 | 18 | 2012 |
| 15,8 | 25,6 | 0,6 | 3 | 2 | 18 | 2000 |
| 15,8 | 25,6 | 0,6 | 5 | 2 | 19 | 2000 |
| 14,6 | 20,2 | 0,6 | 5 | 2 | 22 | 1999 |

|      |      |     |    |   |    |      |
|------|------|-----|----|---|----|------|
| 14,6 | 20,2 | 0,6 | 3  | 2 | 20 | 2003 |
| 14,6 | 20,2 | 0,6 | 3  | 2 | 23 | 2003 |
| 12,1 | 11,5 | 0,6 | 2  | 2 | 23 | 2005 |
| 16,2 | 27,6 | 0,6 | 4  | 2 | 19 | 2012 |
| 15,2 | 22,8 | 0,6 | 6  | 2 | 26 | 2006 |
| 15,2 | 22,8 | 0,6 | 7  | 2 | 24 | 2009 |
| 15,2 | 22,8 | 0,6 | 4  | 2 | 20 | 2013 |
| 14,1 | 18,2 | 0,6 | 3  | 2 | 19 | 2000 |
| 14,1 | 18,2 | 0,6 | 2  | 2 | 26 | 2003 |
| 14,1 | 18,2 | 0,6 | 4  | 2 | 21 | 2011 |
| 16,6 | 29,7 | 0,6 | 6  | 2 | 26 | 2001 |
| 12,7 | 13,3 | 0,6 | 2  | 2 | 22 | 1999 |
| 12,7 | 13,3 | 0,6 | 2  | 2 | 20 | 2002 |
| 12,7 | 13,3 | 0,6 | 2  | 2 | 20 | 2002 |
| 12,7 | 13,3 | 0,6 | 2  | 2 | 23 | 2007 |
| 11,7 | 10,4 | 0,6 | 2  | 2 | 21 | 2014 |
| 16,1 | 27,1 | 0,6 | 5  | 2 | 21 | 2000 |
| 16   | 26,6 | 0,6 | 5  | 2 | 22 | 1999 |
| 16   | 26,6 | 0,6 | 6  | 2 | 22 | 2000 |
| 16   | 26,6 | 0,6 | 6  | 2 | 24 | 2001 |
| 16   | 26,6 | 0,6 | 5  | 2 | 21 | 2005 |
| 16   | 26,6 | 0,6 | 4  | 2 | 19 | 2014 |
| 18,3 | 39,8 | 0,6 | 10 | 2 | 18 | 2015 |
| 13,1 | 14,6 | 0,6 | 3  | 2 | 25 | 2007 |
| 13,1 | 14,6 | 0,6 | 2  | 2 | 17 | 2014 |
| 13,7 | 16,7 | 0,6 | 3  | 2 | 25 | 1999 |
| 13,7 | 16,7 | 0,6 | 3  | 2 | 23 | 2010 |
| 13,7 | 16,7 | 0,6 | 3  | 2 | 23 | 2010 |

|      |      |     |   |   |    |      |
|------|------|-----|---|---|----|------|
| 13,7 | 16,7 | 0,6 | 2 | 2 | 20 | 2011 |
| 14,5 | 19,8 | 0,6 | 3 | 2 | 24 | 2001 |
| 14,5 | 19,8 | 0,6 | 4 | 2 | 26 | 2001 |
| 14,5 | 19,8 | 0,6 | 3 | 2 | 20 | 2002 |
| 14,5 | 19,8 | 0,6 | 2 | 2 | 17 | 2012 |
| 14,2 | 18,6 | 0,6 | 3 | 2 | 16 | 2008 |
| 14,2 | 18,6 | 0,6 | 3 | 2 | 19 | 2012 |
| 14,2 | 18,6 | 0,6 | 3 | 2 | 17 | 2014 |
| 14,4 | 19,4 | 0,6 | 4 | 2 | 22 | 2004 |
| 14,4 | 19,4 | 0,6 | 2 | 2 | 21 | 2006 |
| 14,4 | 19,4 | 0,6 | 4 | 2 | 20 | 2009 |
| 14,4 | 19,4 | 0,6 | 3 | 2 | 20 | 2011 |
| 14,4 | 19,4 | 0,6 | 3 | 2 | 21 | 2015 |
| 12,2 | 11,8 | 0,6 | 2 | 2 | 26 | 2001 |
| 15,5 | 24,2 | 0,6 | 5 | 2 | 18 | 2000 |
| 15,5 | 24,2 | 0,6 | 3 | 2 | 19 | 2000 |
| 15,5 | 24,2 | 0,6 | 6 | 2 | 19 | 2000 |
| 15,5 | 24,2 | 0,6 | 4 | 2 | 19 | 2011 |
| 15,5 | 24,2 | 0,6 | 4 | 2 | 19 | 2012 |
| 12,6 | 13   | 0,6 | 2 | 2 | 22 | 2001 |
| 14,9 | 21,5 | 0,6 | 6 | 2 | 19 | 2008 |
| 16,5 | 29,2 | 0,7 | 4 | 2 | 18 | 2001 |
| 16,5 | 29,2 | 0,7 | 4 | 2 | 22 | 2004 |
| 16,5 | 29,2 | 0,7 | 4 | 2 | 20 | 2007 |
| 18,2 | 39,2 | 0,7 | 5 | 2 | 17 | 2012 |
| 12,5 | 12,7 | 0,7 | 2 | 2 | 20 | 2002 |
| 19   | 44,6 | 0,7 | 5 | 2 | 19 | 2013 |
| 13,5 | 16   | 0,7 | 2 | 2 | 23 | 2005 |

|      |      |     |   |   |    |      |
|------|------|-----|---|---|----|------|
| 13,5 | 16   | 0,7 | 4 | 2 | 23 | 2006 |
| 13,3 | 15,3 | 0,7 | 3 | 2 | 20 | 2000 |
| 13,3 | 15,3 | 0,7 | 2 | 2 | 22 | 2000 |
| 13,3 | 15,3 | 0,7 | 2 | 2 | 20 | 2002 |
| 13,3 | 15,3 | 0,7 | 2 | 2 | 23 | 2002 |
| 13,3 | 15,3 | 0,7 | 2 | 2 | 26 | 2003 |
| 13,3 | 15,3 | 0,7 | 3 | 2 | 22 | 2007 |
| 13,3 | 15,3 | 0,7 | 3 | 2 | 26 | 2009 |
| 12,4 | 12,4 | 0,7 | 2 | 2 | 21 | 2005 |
| 12,4 | 12,4 | 0,7 | 4 | 2 | 21 | 2006 |
| 12,4 | 12,4 | 0,7 | 2 | 2 | 19 | 2014 |
| 17,2 | 33,1 | 0,7 | 5 | 2 | 19 | 2012 |
| 16,9 | 31,4 | 0,7 | 5 | 2 | 19 | 2013 |
| 15,3 | 23,3 | 0,7 | 4 | 2 | 21 | 2003 |
| 15,3 | 23,3 | 0,7 | 3 | 2 | 16 | 2015 |
| 15,1 | 22,4 | 0,7 | 3 | 2 | 22 | 1999 |
| 15,1 | 22,4 | 0,7 | 6 | 2 | 23 | 2006 |
| 15,1 | 22,4 | 0,7 | 4 | 2 | 20 | 2013 |
| 15,6 | 24,7 | 0,7 | 4 | 2 | 21 | 2003 |
| 16,4 | 28,7 | 0,7 | 5 | 2 | 18 | 2000 |
| 16,4 | 28,7 | 0,7 | 4 | 2 | 19 | 2012 |
| 13,8 | 17,1 | 0,7 | 4 | 2 | 19 | 2011 |
| 17,3 | 33,7 | 0,7 | 5 | 2 | 18 | 2000 |
| 14,8 | 21,1 | 0,7 | 3 | 2 | 19 | 2000 |
| 14,8 | 21,1 | 0,7 | 3 | 2 | 19 | 2008 |
| 14,8 | 21,1 | 0,7 | 3 | 2 | 17 | 2014 |
| 13   | 14,3 | 0,7 | 2 | 2 | 24 | 2002 |
| 11,5 | 9,9  | 0,7 | 2 | 2 | 20 | 2004 |

|      |      |     |   |   |    |      |
|------|------|-----|---|---|----|------|
| 16,3 | 28,2 | 0,7 | 2 | 2 | 23 | 1999 |
| 16,3 | 28,2 | 0,7 | 3 | 2 | 20 | 2003 |
| 15,7 | 25,2 | 0,7 | 4 | 2 | 19 | 2011 |
| 17,5 | 34,9 | 0,7 | 6 | 2 | 20 | 2013 |
| 11,8 | 10,7 | 0,7 | 2 | 2 | 23 | 2007 |
| 19,2 | 46,1 | 0,7 | 6 | 2 | 19 | 2010 |
| 19,2 | 46,1 | 0,7 | 6 | 2 | 19 | 2010 |
| 20,1 | 52,9 | 0,7 | 7 | 2 | 19 | 2012 |
| 11,3 | 9,4  | 0,7 | 1 | 2 | 26 | 2001 |
| 11,3 | 9,4  | 0,7 | 2 | 2 | 23 | 2007 |
| 13,9 | 17,5 | 0,7 | 3 | 2 | 25 | 1999 |
| 13,9 | 17,5 | 0,7 | 3 | 2 | 18 | 2008 |
| 13,9 | 17,5 | 0,7 | 2 | 2 | 21 | 2014 |
| 15,4 | 23,8 | 0,7 | 5 | 2 | 22 | 2000 |
| 15,4 | 23,8 | 0,7 | 3 | 2 | 20 | 2003 |
| 15,4 | 23,8 | 0,7 | 4 | 2 | 23 | 2015 |
| 14,7 | 20,7 | 0,7 | 5 | 2 | 21 | 1999 |
| 14,7 | 20,7 | 0,7 | 3 | 2 | 18 | 2000 |
| 14,7 | 20,7 | 0,7 | 5 | 2 | 19 | 2000 |
| 16,1 | 27,2 | 0,7 | 3 | 2 | 19 | 2012 |
| 16,1 | 27,2 | 0,7 | 5 | 2 | 21 | 2013 |
| 15,9 | 26,2 | 0,7 | 5 | 2 | 19 | 2013 |
| 15   | 22   | 0,7 | 7 | 2 | 25 | 2002 |
| 15   | 22   | 0,7 | 3 | 2 | 23 | 2003 |
| 15   | 22   | 0,7 | 3 | 2 | 20 | 2006 |
| 15   | 22   | 0,7 | 5 | 2 | 19 | 2007 |
| 15   | 22   | 0,7 | 3 | 2 | 20 | 2011 |
| 15   | 22   | 0,7 | 3 | 2 | 19 | 2013 |

|      |      |     |    |   |    |      |
|------|------|-----|----|---|----|------|
| 15   | 22   | 0,7 | 3  | 2 | 18 | 2015 |
| 16   | 26,7 | 0,7 | 3  | 2 | 22 | 2003 |
| 16   | 26,7 | 0,7 | 4  | 2 | 19 | 2007 |
| 15,2 | 22,9 | 0,7 | 4  | 2 | 24 | 2001 |
| 15,2 | 22,9 | 0,7 | 4  | 2 | 26 | 2003 |
| 15,2 | 22,9 | 0,7 | 4  | 2 | 17 | 2012 |
| 12,9 | 14   | 0,7 | 5  | 2 | 25 | 2007 |
| 12,9 | 14   | 0,7 | 2  | 2 | 22 | 2009 |
| 13,2 | 15   | 0,7 | 3  | 2 | 19 | 2008 |
| 13,2 | 15   | 0,7 | 3  | 2 | 19 | 2008 |
| 13,2 | 15   | 0,7 | 2  | 2 | 21 | 2014 |
| 16,5 | 29,3 | 0,7 | 10 | 2 | 23 | 2007 |
| 16,5 | 29,3 | 0,7 | 6  | 2 | 20 | 2011 |
| 14,6 | 20,3 | 0,7 | 3  | 2 | 18 | 2000 |
| 14,6 | 20,3 | 0,7 | 3  | 2 | 20 | 2000 |
| 14,6 | 20,3 | 0,7 | 4  | 2 | 20 | 2011 |
| 14,6 | 20,3 | 0,7 | 3  | 2 | 19 | 2014 |
| 14,6 | 20,3 | 0,7 | 3  | 2 | 18 | 2015 |
| 14   | 17,9 | 0,7 | 3  | 2 | 21 | 2006 |
| 14   | 17,9 | 0,7 | 4  | 2 | 24 | 2006 |
| 14   | 17,9 | 0,7 | 5  | 2 | 19 | 2007 |
| 14   | 17,9 | 0,7 | 4  | 2 | 21 | 2008 |
| 14   | 17,9 | 0,7 | 4  | 2 | 19 | 2012 |
| 13,4 | 15,7 | 0,7 | 3  | 2 | 19 | 2000 |
| 13,4 | 15,7 | 0,7 | 3  | 2 | 18 | 2008 |
| 13,4 | 15,7 | 0,7 | 2  | 2 | 24 | 2009 |
| 13,4 | 15,7 | 0,7 | 3  | 2 | 23 | 2010 |
| 13,4 | 15,7 | 0,7 | 3  | 2 | 23 | 2010 |

|      |      |     |   |   |    |      |
|------|------|-----|---|---|----|------|
| 15,5 | 24,3 | 0,7 | 3 | 2 | 23 | 2003 |
| 15,5 | 24,3 | 0,7 | 5 | 2 | 20 | 2006 |
| 19,2 | 46,2 | 0,7 | 6 | 2 | 18 | 2012 |
| 14,5 | 19,9 | 0,7 | 3 | 2 | 26 | 2003 |
| 14,1 | 18,3 | 0,7 | 3 | 2 | 21 | 2000 |
| 14,1 | 18,3 | 0,7 | 2 | 2 | 26 | 2001 |
| 14,1 | 18,3 | 0,7 | 4 | 2 | 22 | 2003 |
| 14,1 | 18,3 | 0,7 | 3 | 2 | 23 | 2005 |
| 14,1 | 18,3 | 0,7 | 3 | 2 | 23 | 2007 |
| 14,1 | 18,3 | 0,7 | 4 | 2 | 17 | 2009 |
| 14,1 | 18,3 | 0,7 | 4 | 2 | 24 | 2009 |
| 14,1 | 18,3 | 0,7 | 3 | 2 | 19 | 2012 |
| 14,1 | 18,3 | 0,7 | 4 | 2 | 19 | 2012 |
| 16,4 | 28,8 | 0,7 | 7 | 2 | 17 | 2012 |
| 14,9 | 21,6 | 0,7 | 4 | 2 | 23 | 2015 |
| 10,7 | 8    | 0,7 | 2 | 2 | 23 | 2004 |
| 14,4 | 19,5 | 0,7 | 4 | 2 | 23 | 1999 |
| 14,4 | 19,5 | 0,7 | 5 | 2 | 20 | 2000 |
| 14,4 | 19,5 | 0,7 | 3 | 2 | 22 | 2001 |
| 14,4 | 19,5 | 0,7 | 6 | 2 | 21 | 2008 |
| 14,2 | 18,7 | 0,7 | 5 | 2 | 20 | 2007 |
| 14,2 | 18,7 | 0,7 | 3 | 2 | 21 | 2008 |
| 14,2 | 18,7 | 0,7 | 3 | 2 | 18 | 2014 |
| 14,3 | 19,1 | 0,7 | 4 | 2 | 23 | 2003 |
| 14,3 | 19,1 | 0,7 | 3 | 2 | 21 | 2008 |
| 14,3 | 19,1 | 0,7 | 4 | 2 | 23 | 2009 |
| 14,3 | 19,1 | 0,7 | 3 | 2 | 19 | 2014 |
| 14,3 | 19,1 | 0,7 | 4 | 2 | 19 | 2015 |

|      |      |     |   |   |    |      |
|------|------|-----|---|---|----|------|
| 12,8 | 13,7 | 0,7 | 2 | 2 | 26 | 1999 |
| 12,8 | 13,7 | 0,7 | 3 | 2 | 19 | 2008 |
| 12,8 | 13,7 | 0,7 | 2 | 2 | 26 | 2009 |
| 12,8 | 13,7 | 0,7 | 3 | 2 | 23 | 2010 |
| 12,8 | 13,7 | 0,7 | 3 | 2 | 23 | 2010 |
| 12,8 | 13,7 | 0,7 | 2 | 2 | 18 | 2014 |
| 15,3 | 23,4 | 0,7 | 3 | 2 | 19 | 2012 |
| 13,7 | 16,8 | 0,7 | 2 | 2 | 21 | 2000 |
| 11,6 | 10,2 | 0,7 | 2 | 2 | 23 | 2007 |
| 15,1 | 22,5 | 0,7 | 4 | 2 | 17 | 2009 |
| 15,1 | 22,5 | 0,7 | 3 | 2 | 18 | 2012 |
| 18,2 | 39,4 | 0,7 | 5 | 2 | 17 | 2014 |
| 11   | 8,7  | 0,7 | 2 | 2 | 20 | 2004 |
| 11   | 8,7  | 0,7 | 1 | 2 | 24 | 2009 |
| 15,7 | 25,3 | 0,7 | 3 | 2 | 18 | 2015 |
| 16,8 | 31   | 0,7 | 4 | 2 | 25 | 2004 |
| 17,9 | 37,5 | 0,7 | 6 | 2 | 17 | 2012 |
| 16,2 | 27,8 | 0,7 | 5 | 2 | 22 | 1999 |
| 16,2 | 27,8 | 0,7 | 5 | 2 | 22 | 2009 |
| 13,1 | 14,7 | 0,7 | 2 | 2 | 18 | 2002 |
| 13,1 | 14,7 | 0,7 | 2 | 2 | 18 | 2002 |
| 13,1 | 14,7 | 0,7 | 3 | 2 | 25 | 2007 |
| 13,1 | 14,7 | 0,7 | 3 | 2 | 19 | 2008 |
| 12   | 11,3 | 0,7 | 2 | 2 | 26 | 2001 |
| 12   | 11,3 | 0,7 | 2 | 2 | 25 | 2005 |
| 12   | 11,3 | 0,7 | 2 | 2 | 23 | 2007 |
| 12   | 11,3 | 0,7 | 2 | 2 | 23 | 2007 |
| 14,8 | 21,2 | 0,7 | 3 | 2 | 21 | 2003 |

|      |      |     |   |   |    |      |
|------|------|-----|---|---|----|------|
| 14,8 | 21,2 | 0,7 | 5 | 2 | 17 | 2009 |
| 15,8 | 25,8 | 0,7 | 5 | 2 | 20 | 1999 |
| 16,1 | 27,3 | 0,7 | 4 | 2 | 17 | 2008 |
| 12,7 | 13,4 | 0,7 | 2 | 2 | 20 | 2002 |
| 12,7 | 13,4 | 0,7 | 2 | 2 | 22 | 2013 |
| 12,7 | 13,4 | 0,7 | 2 | 2 | 20 | 2013 |
| 15,9 | 26,3 | 0,7 | 6 | 2 | 20 | 2011 |
| 16   | 26,8 | 0,7 | 5 | 2 | 21 | 2000 |
| 13,5 | 16,1 | 0,7 | 2 | 2 | 22 | 2002 |
| 13,5 | 16,1 | 0,7 | 2 | 2 | 25 | 2003 |
| 13,5 | 16,1 | 0,7 | 3 | 2 | 23 | 2010 |
| 13,5 | 16,1 | 0,7 | 3 | 2 | 23 | 2010 |
| 15,4 | 23,9 | 0,7 | 3 | 2 | 18 | 2001 |
| 15,4 | 23,9 | 0,7 | 5 | 2 | 19 | 2011 |
| 15,4 | 23,9 | 0,7 | 7 | 2 | 21 | 2014 |
| 13,3 | 15,4 | 0,7 | 2 | 2 | 22 | 2000 |
| 13,3 | 15,4 | 0,7 | 2 | 2 | 24 | 2002 |
| 13,3 | 15,4 | 0,7 | 3 | 2 | 22 | 2005 |
| 13,3 | 15,4 | 0,7 | 3 | 2 | 26 | 2006 |
| 13,3 | 15,4 | 0,7 | 3 | 2 | 19 | 2015 |
| 11,4 | 9,7  | 0,7 | 2 | 2 | 23 | 2004 |
| 19,6 | 49,3 | 0,7 | 8 | 2 | 22 | 2013 |
| 12,1 | 11,6 | 0,7 | 2 | 2 | 19 | 2006 |
| 14,7 | 20,8 | 0,7 | 5 | 2 | 25 | 1999 |
| 14,7 | 20,8 | 0,7 | 3 | 2 | 24 | 2001 |
| 14,7 | 20,8 | 0,7 | 4 | 2 | 23 | 2011 |
| 14,7 | 20,8 | 0,7 | 5 | 2 | 19 | 2012 |
| 14,7 | 20,8 | 0,7 | 3 | 2 | 19 | 2012 |

|      |      |     |   |   |    |      |
|------|------|-----|---|---|----|------|
| 15   | 22,1 | 0,7 | 3 | 2 | 20 | 2003 |
| 15   | 22,1 | 0,7 | 4 | 2 | 26 | 2003 |
| 15   | 22,1 | 0,7 | 5 | 2 | 21 | 2006 |
| 17,6 | 35,7 | 0,7 | 6 | 2 | 19 | 2010 |
| 17,6 | 35,7 | 0,7 | 6 | 2 | 19 | 2010 |
| 11,2 | 9,2  | 0,7 | 2 | 2 | 25 | 2005 |
| 11,2 | 9,2  | 0,7 | 2 | 2 | 22 | 2007 |
| 12,6 | 13,1 | 0,7 | 2 | 2 | 20 | 2001 |
| 12,6 | 13,1 | 0,7 | 2 | 2 | 21 | 2005 |
| 12,6 | 13,1 | 0,7 | 2 | 2 | 18 | 2014 |
| 17,5 | 35,1 | 0,7 | 4 | 2 | 19 | 2010 |
| 17,5 | 35,1 | 0,7 | 4 | 2 | 19 | 2010 |
| 15,2 | 23   | 0,7 | 4 | 2 | 23 | 2001 |
| 15,2 | 23   | 0,7 | 4 | 2 | 23 | 2003 |
| 15,2 | 23   | 0,7 | 3 | 2 | 20 | 2006 |
| 15,2 | 23   | 0,7 | 4 | 2 | 22 | 2011 |
| 16,4 | 28,9 | 0,7 | 5 | 2 | 19 | 2000 |
| 16,4 | 28,9 | 0,7 | 7 | 2 | 20 | 2007 |
| 15,5 | 24,4 | 0,7 | 6 | 2 | 20 | 1999 |
| 15,5 | 24,4 | 0,7 | 4 | 2 | 20 | 2003 |
| 12,2 | 11,9 | 0,7 | 1 | 2 | 26 | 2001 |
| 12,2 | 11,9 | 0,7 | 2 | 2 | 23 | 2006 |
| 12,2 | 11,9 | 0,7 | 2 | 2 | 24 | 2006 |
| 12,2 | 11,9 | 0,7 | 2 | 2 | 23 | 2007 |
| 12,2 | 11,9 | 0,7 | 2 | 2 | 22 | 2011 |
| 13,9 | 17,6 | 0,7 | 4 | 2 | 23 | 2005 |
| 12,5 | 12,8 | 0,7 | 2 | 2 | 19 | 2013 |
| 17   | 32,2 | 0,7 | 5 | 2 | 17 | 2002 |

|      |      |     |   |   |    |      |
|------|------|-----|---|---|----|------|
| 13   | 14,4 | 0,7 | 2 | 2 | 20 | 2002 |
| 13   | 14,4 | 0,7 | 2 | 2 | 21 | 2008 |
| 13   | 14,4 | 0,7 | 2 | 2 | 21 | 2013 |
| 12,3 | 12,2 | 0,7 | 2 | 2 | 22 | 2000 |
| 12,3 | 12,2 | 0,7 | 3 | 2 | 22 | 2007 |
| 12,4 | 12,5 | 0,7 | 2 | 2 | 24 | 2009 |
| 16,6 | 30   | 0,7 | 7 | 2 | 19 | 2012 |
| 13,6 | 16,5 | 0,7 | 3 | 2 | 21 | 2001 |
| 13,6 | 16,5 | 0,7 | 3 | 2 | 22 | 2011 |
| 14   | 18   | 0,7 | 5 | 2 | 27 | 1999 |
| 14   | 18   | 0,7 | 4 | 2 | 23 | 2004 |
| 14   | 18   | 0,7 | 3 | 2 | 23 | 2007 |
| 14   | 18   | 0,7 | 2 | 2 | 22 | 2009 |
| 14   | 18   | 0,7 | 2 | 2 | 19 | 2012 |
| 14,9 | 21,7 | 0,7 | 4 | 2 | 20 | 2011 |
| 14,9 | 21,7 | 0,7 | 3 | 2 | 19 | 2012 |
| 14,9 | 21,7 | 0,7 | 3 | 2 | 21 | 2015 |
| 14,5 | 20   | 0,7 | 3 | 2 | 22 | 2000 |
| 14,5 | 20   | 0,7 | 2 | 2 | 22 | 2003 |
| 14,5 | 20   | 0,7 | 3 | 2 | 21 | 2014 |
| 15,3 | 23,5 | 0,7 | 6 | 2 | 24 | 2001 |
| 15,3 | 23,5 | 0,7 | 4 | 2 | 20 | 2008 |
| 15,3 | 23,5 | 0,7 | 5 | 2 | 22 | 2015 |
| 18,8 | 43,6 | 0,7 | 6 | 2 | 19 | 2013 |
| 16,2 | 27,9 | 0,7 | 4 | 2 | 22 | 2004 |
| 14,1 | 18,4 | 0,7 | 2 | 2 | 24 | 2002 |
| 14,1 | 18,4 | 0,7 | 5 | 2 | 21 | 2006 |
| 14,1 | 18,4 | 0,7 | 3 | 2 | 18 | 2008 |

|      |      |     |   |   |    |      |
|------|------|-----|---|---|----|------|
| 14,1 | 18,4 | 0,7 | 3 | 2 | 19 | 2014 |
| 14,1 | 18,4 | 0,7 | 3 | 2 | 22 | 2015 |
| 17,7 | 36,4 | 0,7 | 5 | 2 | 19 | 2013 |
| 13,2 | 15,1 | 0,7 | 2 | 2 | 21 | 2012 |
| 19,3 | 47,2 | 0,7 | 7 | 2 | 17 | 2012 |
| 14,2 | 18,8 | 0,7 | 5 | 2 | 23 | 2006 |
| 14,2 | 18,8 | 0,7 | 6 | 2 | 23 | 2008 |
| 14,3 | 19,2 | 0,7 | 4 | 2 | 22 | 2001 |
| 14,3 | 19,2 | 0,7 | 4 | 2 | 25 | 2002 |
| 14,3 | 19,2 | 0,7 | 3 | 2 | 20 | 2008 |
| 14,3 | 19,2 | 0,7 | 3 | 2 | 20 | 2012 |
| 14,3 | 19,2 | 0,7 | 3 | 2 | 15 | 2015 |
| 14,3 | 19,2 | 0,7 | 3 | 2 | 21 | 2015 |
| 15,8 | 25,9 | 0,7 | 6 | 2 | 23 | 2005 |
| 13,4 | 15,8 | 0,7 | 2 | 2 | 27 | 1999 |
| 13,4 | 15,8 | 0,7 | 2 | 2 | 23 | 2001 |
| 13,4 | 15,8 | 0,7 | 3 | 2 | 20 | 2002 |
| 13,4 | 15,8 | 0,7 | 3 | 2 | 25 | 2008 |
| 16,5 | 29,5 | 0,7 | 5 | 2 | 25 | 2004 |
| 16   | 26,9 | 0,7 | 5 | 2 | 26 | 2000 |
| 16   | 26,9 | 0,7 | 6 | 2 | 23 | 2011 |
| 16   | 26,9 | 0,7 | 4 | 2 | 19 | 2012 |
| 16,9 | 31,7 | 0,7 | 6 | 2 | 17 | 2012 |
| 17,4 | 34,6 | 0,7 | 4 | 2 | 19 | 2012 |
| 19,2 | 46,5 | 0,7 | 7 | 2 | 18 | 2012 |
| 19,2 | 46,5 | 0,7 | 6 | 2 | 15 | 2015 |
| 16,7 | 30,6 | 0,7 | 7 | 2 | 19 | 2012 |
| 14,8 | 21,3 | 0,7 | 5 | 2 | 23 | 1999 |

|      |      |     |    |   |    |      |
|------|------|-----|----|---|----|------|
| 14,8 | 21,3 | 0,7 | 5  | 2 | 26 | 1999 |
| 14,8 | 21,3 | 0,7 | 4  | 2 | 22 | 2004 |
| 14,8 | 21,3 | 0,7 | 4  | 2 | 23 | 2005 |
| 15,4 | 24   | 0,7 | 6  | 2 | 21 | 1999 |
| 13,7 | 16,9 | 0,7 | 2  | 2 | 27 | 1999 |
| 13,7 | 16,9 | 0,7 | 2  | 2 | 25 | 2008 |
| 11,5 | 10   | 0,7 | 3  | 2 | 20 | 2004 |
| 20,6 | 57,5 | 0,7 | 8  | 2 | 15 | 2015 |
| 15   | 22,2 | 0,7 | 3  | 2 | 19 | 2012 |
| 15,2 | 23,1 | 0,7 | 3  | 2 | 17 | 2002 |
| 15,2 | 23,1 | 0,7 | 5  | 2 | 19 | 2007 |
| 15,2 | 23,1 | 0,7 | 4  | 2 | 23 | 2008 |
| 10,4 | 7,4  | 0,7 | 2  | 2 | 23 | 2004 |
| 15,5 | 24,5 | 0,7 | 6  | 2 | 20 | 2013 |
| 19,3 | 47,3 | 0,7 | 10 | 2 | 19 | 2013 |
| 14,7 | 20,9 | 0,7 | 4  | 2 | 20 | 1999 |
| 14,7 | 20,9 | 0,7 | 4  | 2 | 18 | 2001 |
| 17,1 | 32,9 | 0,7 | 7  | 2 | 18 | 2000 |
| 12,8 | 13,8 | 0,7 | 2  | 2 | 19 | 2002 |
| 12,8 | 13,8 | 0,7 | 2  | 2 | 26 | 2009 |
| 11,1 | 9    | 0,7 | 2  | 2 | 23 | 2004 |
| 16,3 | 28,5 | 0,7 | 5  | 2 | 20 | 1999 |
| 16,3 | 28,5 | 0,7 | 4  | 2 | 20 | 2003 |
| 16,3 | 28,5 | 0,7 | 7  | 2 | 20 | 2012 |
| 13,8 | 17,3 | 0,7 | 2  | 2 | 21 | 2000 |
| 13,8 | 17,3 | 0,7 | 3  | 2 | 21 | 2008 |
| 13,8 | 17,3 | 0,7 | 2  | 2 | 21 | 2015 |
| 13,1 | 14,8 | 0,7 | 3  | 2 | 23 | 2007 |

|      |      |     |   |   |    |      |
|------|------|-----|---|---|----|------|
| 19,2 | 46,6 | 0,7 | 8 | 2 | 19 | 2013 |
| 11,3 | 9,5  | 0,7 | 2 | 2 | 25 | 2004 |
| 13,5 | 16,2 | 0,7 | 2 | 2 | 26 | 2003 |
| 13,5 | 16,2 | 0,7 | 3 | 2 | 19 | 2007 |
| 13,5 | 16,2 | 0,7 | 4 | 2 | 24 | 2009 |
| 18   | 38,4 | 0,7 | 5 | 2 | 18 | 2015 |
| 15,6 | 25   | 0,7 | 4 | 2 | 19 | 2007 |
| 18,2 | 39,7 | 0,7 | 5 | 2 | 17 | 2014 |
| 19,9 | 51,9 | 0,7 | 8 | 2 | 19 | 2008 |
| 17,4 | 34,7 | 0,7 | 8 | 2 | 26 | 2001 |
| 14,6 | 20,5 | 0,7 | 4 | 2 | 19 | 2000 |
| 14,6 | 20,5 | 0,7 | 3 | 2 | 25 | 2007 |
| 13,3 | 15,5 | 0,7 | 2 | 2 | 23 | 2002 |
| 13,3 | 15,5 | 0,7 | 3 | 2 | 21 | 2008 |
| 13,3 | 15,5 | 0,7 | 3 | 2 | 21 | 2008 |
| 13,3 | 15,5 | 0,7 | 3 | 2 | 18 | 2015 |
| 13,9 | 17,7 | 0,7 | 3 | 2 | 18 | 2001 |
| 13,9 | 17,7 | 0,7 | 3 | 2 | 21 | 2003 |
| 18,8 | 43,8 | 0,7 | 6 | 2 | 19 | 2013 |
| 15,8 | 26   | 0,7 | 5 | 2 | 19 | 2000 |
| 16   | 27   | 0,7 | 5 | 2 | 21 | 1999 |
| 16   | 27   | 0,7 | 5 | 2 | 20 | 2001 |
| 15,9 | 26,5 | 0,7 | 5 | 2 | 25 | 2003 |
| 15,9 | 26,5 | 0,7 | 6 | 2 | 19 | 2013 |
| 14,5 | 20,1 | 0,7 | 6 | 2 | 25 | 1999 |
| 14,5 | 20,1 | 0,7 | 7 | 2 | 24 | 2009 |
| 15,1 | 22,7 | 0,7 | 6 | 2 | 22 | 2013 |
| 14   | 18,1 | 0,7 | 3 | 2 | 25 | 2004 |

|      |      |     |   |   |    |      |
|------|------|-----|---|---|----|------|
| 14   | 18,1 | 0,7 | 4 | 2 | 21 | 2006 |
| 14   | 18,1 | 0,7 | 4 | 2 | 21 | 2006 |
| 14   | 18,1 | 0,7 | 4 | 2 | 20 | 2009 |
| 14   | 18,1 | 0,7 | 4 | 2 | 24 | 2009 |
| 12   | 11,4 | 0,7 | 2 | 2 | 25 | 2007 |
| 16,4 | 29,1 | 0,7 | 6 | 2 | 17 | 2012 |
| 14,4 | 19,7 | 0,7 | 2 | 2 | 21 | 2000 |
| 14,4 | 19,7 | 0,7 | 3 | 2 | 21 | 2003 |
| 14,4 | 19,7 | 0,7 | 4 | 2 | 24 | 2006 |
| 14,4 | 19,7 | 0,7 | 3 | 2 | 15 | 2015 |
| 15,4 | 24,1 | 0,7 | 4 | 2 | 22 | 2011 |
| 12,6 | 13,2 | 0,7 | 2 | 2 | 19 | 2000 |
| 11,6 | 10,3 | 0,7 | 2 | 2 | 25 | 2007 |
| 13,6 | 16,6 | 0,7 | 2 | 2 | 23 | 2002 |
| 14,1 | 18,5 | 0,7 | 3 | 2 | 24 | 2002 |
| 14,1 | 18,5 | 0,7 | 4 | 2 | 24 | 2006 |
| 13   | 14,5 | 0,7 | 2 | 2 | 20 | 2000 |
| 13   | 14,5 | 0,7 | 3 | 2 | 25 | 2007 |
| 13   | 14,5 | 0,7 | 2 | 2 | 24 | 2009 |
| 13   | 14,5 | 0,7 | 2 | 2 | 23 | 2010 |
| 13   | 14,5 | 0,7 | 2 | 2 | 23 | 2010 |
| 10   | 6,6  | 0,7 | 1 | 2 | 25 | 2005 |
| 10   | 6,6  | 0,7 | 1 | 2 | 23 | 2007 |
| 14,3 | 19,3 | 0,7 | 3 | 2 | 22 | 2004 |
| 21,5 | 65,6 | 0,7 | 5 | 2 | 18 | 2012 |
| 14,2 | 18,9 | 0,7 | 3 | 2 | 25 | 2003 |
| 14,2 | 18,9 | 0,7 | 5 | 2 | 24 | 2006 |
| 14,2 | 18,9 | 0,7 | 2 | 2 | 25 | 2008 |

|      |      |     |     |   |    |      |
|------|------|-----|-----|---|----|------|
| 19,4 | 48,2 | 0,7 | 10+ | 2 | 17 | 2014 |
| 12,1 | 11,7 | 0,7 | 3   | 2 | 25 | 2003 |
| 12,1 | 11,7 | 0,7 | 2   | 2 | 21 | 2011 |
| 12,5 | 12,9 | 0,7 | 2   | 2 | 23 | 1999 |
| 15,2 | 23,2 | 0,7 | 3   | 2 | 26 | 2000 |
| 15,2 | 23,2 | 0,7 | 4   | 2 | 17 | 2012 |
| 15,2 | 23,2 | 0,7 | 5   | 2 | 19 | 2013 |
| 15,2 | 23,2 | 0,7 | 5   | 2 | 20 | 2013 |
| 15,2 | 23,2 | 0,7 | 3   | 2 | 21 | 2015 |
| 15   | 22,3 | 0,7 | 4   | 2 | 17 | 2009 |
| 13,4 | 15,9 | 0,7 | 2   | 2 | 22 | 1999 |
| 13,4 | 15,9 | 0,7 | 2   | 2 | 23 | 2002 |
| 13,4 | 15,9 | 0,7 | 2   | 2 | 23 | 2003 |
| 13,4 | 15,9 | 0,7 | 3   | 2 | 24 | 2009 |
| 13,4 | 15,9 | 0,7 | 3   | 2 | 23 | 2010 |
| 13,4 | 15,9 | 0,7 | 3   | 2 | 23 | 2010 |
| 13,4 | 15,9 | 0,7 | 3   | 2 | 21 | 2011 |
| 21   | 61,2 | 0,7 | 6   | 2 | 18 | 2012 |
| 12,2 | 12   | 0,7 | 2   | 2 | 24 | 2006 |
| 12,2 | 12   | 0,7 | 3   | 2 | 23 | 2010 |
| 12,2 | 12   | 0,7 | 3   | 2 | 23 | 2010 |
| 12,2 | 12   | 0,7 | 2   | 2 | 19 | 2013 |
| 12,4 | 12,6 | 0,7 | 2   | 2 | 22 | 2000 |
| 12,4 | 12,6 | 0,7 | 2   | 2 | 26 | 2003 |
| 12,4 | 12,6 | 0,7 | 2   | 2 | 20 | 2013 |
| 13,2 | 15,2 | 0,7 | 5   | 2 | 23 | 1999 |
| 13,2 | 15,2 | 0,7 | 2   | 2 | 20 | 2002 |
| 13,2 | 15,2 | 0,7 | 3   | 2 | 21 | 2005 |

|      |      |     |   |   |    |      |
|------|------|-----|---|---|----|------|
| 13,2 | 15,2 | 0,7 | 2 | 2 | 23 | 2006 |
| 13,2 | 15,2 | 0,7 | 3 | 2 | 25 | 2007 |
| 13,2 | 15,2 | 0,7 | 3 | 2 | 21 | 2008 |
| 13,2 | 15,2 | 0,7 | 2 | 2 | 26 | 2009 |
| 13,2 | 15,2 | 0,7 | 3 | 2 | 22 | 2011 |
| 13,2 | 15,2 | 0,7 | 3 | 2 | 22 | 2011 |
| 13,2 | 15,2 | 0,7 | 3 | 2 | 19 | 2014 |
| 13,2 | 15,2 | 0,7 | 3 | 2 | 19 | 2014 |
| 12,3 | 12,3 | 0,7 | 2 | 2 | 21 | 2009 |
| 14,7 | 21   | 0,7 | 3 | 2 | 25 | 2004 |
| 14,7 | 21   | 0,7 | 4 | 2 | 18 | 2014 |
| 13,7 | 17   | 0,7 | 5 | 2 | 26 | 1999 |
| 13,7 | 17   | 0,7 | 2 | 2 | 20 | 2000 |
| 13,7 | 17   | 0,7 | 3 | 2 | 25 | 2004 |
| 13,7 | 17   | 0,7 | 3 | 2 | 22 | 2005 |
| 13,7 | 17   | 0,7 | 2 | 2 | 24 | 2009 |
| 11   | 8,8  | 0,7 | 2 | 2 | 23 | 2004 |
| 16,1 | 27,6 | 0,7 | 6 | 2 | 19 | 2013 |
| 12,9 | 14,2 | 0,7 | 4 | 2 | 21 | 2006 |
| 12,9 | 14,2 | 0,7 | 2 | 2 | 20 | 2013 |
| 17   | 32,5 | 0,7 | 6 | 2 | 20 | 2013 |
| 15,7 | 25,6 | 0,7 | 3 | 2 | 19 | 2011 |

|      |      |     |   |   |    |      |
|------|------|-----|---|---|----|------|
| 15,7 | 25,6 | 0,7 | 4 | 2 | 21 | 2013 |
| 16   | 27,1 | 0,7 | 5 | 2 | 22 | 2013 |
| 15,3 | 23,7 | 0,7 | 4 | 2 | 23 | 1999 |
| 15,3 | 23,7 | 0,7 | 5 | 2 | 18 | 2000 |
| 15,3 | 23,7 | 0,7 | 4 | 2 | 23 | 2015 |
| 15,9 | 26,6 | 0,7 | 4 | 2 | 18 | 1999 |
| 11,7 | 10,6 | 0,7 | 1 | 2 | 22 | 2001 |
| 19   | 45,4 | 0,7 | 6 | 2 | 19 | 2013 |
| 14,6 | 20,6 | 0,7 | 4 | 2 | 25 | 1999 |
| 11,2 | 9,3  | 0,7 | 2 | 2 | 25 | 2004 |
| 17,1 | 33,1 | 0,7 | 5 | 2 | 21 | 2015 |
| 14,9 | 21,9 | 0,7 | 4 | 2 | 19 | 2012 |
| 13,8 | 17,4 | 0,7 | 3 | 2 | 25 | 2007 |
| 13,8 | 17,4 | 0,7 | 3 | 2 | 25 | 2008 |
| 19,8 | 51,4 | 0,7 | 9 | 2 | 20 | 2010 |
| 19,8 | 51,4 | 0,7 | 9 | 2 | 20 | 2010 |
| 16,8 | 31,4 | 0,7 | 4 | 2 | 19 | 2004 |
| 15,1 | 22,8 | 0,7 | 3 | 2 | 19 | 2007 |
| 17,2 | 33,7 | 0,7 | 5 | 2 | 19 | 2014 |

|      |      |     |   |   |    |      |
|------|------|-----|---|---|----|------|
| 17,3 | 34,3 | 0,7 | 6 | 2 | 20 | 2003 |
| 13,5 | 16,3 | 0,7 | 2 | 2 | 27 | 1999 |
| 13,5 | 16,3 | 0,7 | 2 | 2 | 21 | 2000 |
| 13,5 | 16,3 | 0,7 | 2 | 2 | 19 | 2000 |
| 13,5 | 16,3 | 0,7 | 3 | 2 | 22 | 2005 |
| 13,5 | 16,3 | 0,7 | 3 | 2 | 23 | 2007 |
| 13,5 | 16,3 | 0,7 | 3 | 2 | 24 | 2009 |
| 13,5 | 16,3 | 0,7 | 2 | 2 | 21 | 2015 |
| 14,5 | 20,2 | 0,7 | 4 | 2 | 21 | 1999 |
| 14,5 | 20,2 | 0,7 | 5 | 2 | 22 | 2007 |
| 14,5 | 20,2 | 0,7 | 4 | 2 | 15 | 2015 |
| 15,4 | 24,2 | 0,7 | 4 | 2 | 19 | 2011 |
| 15,4 | 24,2 | 0,7 | 6 | 2 | 19 | 2012 |
| 16,3 | 28,7 | 0,7 | 4 | 2 | 24 | 2002 |
| 19,6 | 49,9 | 0,7 | 7 | 2 | 18 | 2012 |
| 13,1 | 14,9 | 0,7 | 2 | 2 | 19 | 2000 |
| 13,1 | 14,9 | 0,7 | 2 | 2 | 20 | 2006 |
| 13,1 | 14,9 | 0,7 | 2 | 2 | 20 | 2008 |
| 13,1 | 14,9 | 0,7 | 2 | 2 | 23 | 2015 |

|      |      |     |   |   |    |      |
|------|------|-----|---|---|----|------|
| 13,9 | 17,8 | 0,7 | 3 | 2 | 22 | 2000 |
| 13,3 | 15,6 | 0,7 | 2 | 2 | 19 | 1999 |
| 13,3 | 15,6 | 0,7 | 3 | 2 | 19 | 2002 |
| 13,3 | 15,6 | 0,7 | 2 | 2 | 23 | 2002 |
| 13,3 | 15,6 | 0,7 | 2 | 2 | 23 | 2003 |
| 13,3 | 15,6 | 0,7 | 2 | 2 | 23 | 2010 |
| 13,3 | 15,6 | 0,7 | 2 | 2 | 23 | 2010 |
| 14,4 | 19,8 | 0,7 | 4 | 2 | 23 | 1999 |
| 14,4 | 19,8 | 0,7 | 5 | 2 | 25 | 1999 |
| 14,4 | 19,8 | 0,7 | 3 | 2 | 22 | 2004 |
| 14,4 | 19,8 | 0,7 | 6 | 2 | 22 | 2011 |
| 14,4 | 19,8 | 0,7 | 3 | 2 | 21 | 2015 |
| 14,8 | 21,5 | 0,7 | 5 | 2 | 18 | 1999 |
| 14,8 | 21,5 | 0,7 | 4 | 2 | 25 | 1999 |
| 14,8 | 21,5 | 0,7 | 4 | 2 | 18 | 2015 |
| 15,5 | 24,7 | 0,7 | 5 | 2 | 23 | 1999 |
| 14,3 | 19,4 | 0,7 | 4 | 2 | 24 | 2006 |
| 14,3 | 19,4 | 0,7 | 3 | 2 | 20 | 2012 |
| 16,7 | 30,9 | 0,7 | 4 | 2 | 18 | 2001 |

|      |      |     |   |   |    |      |
|------|------|-----|---|---|----|------|
| 16,7 | 30,9 | 0,7 | 4 | 2 | 18 | 2002 |
| 15,2 | 23,3 | 0,7 | 5 | 2 | 20 | 1999 |
| 14,1 | 18,6 | 0,7 | 3 | 2 | 19 | 2006 |
| 14,1 | 18,6 | 0,7 | 3 | 2 | 25 | 2007 |
| 14,1 | 18,6 | 0,7 | 6 | 2 | 20 | 2008 |
| 14,1 | 18,6 | 0,7 | 3 | 2 | 21 | 2008 |
| 15   | 22,4 | 0,7 | 6 | 2 | 22 | 1999 |
| 15   | 22,4 | 0,7 | 4 | 2 | 19 | 2007 |
| 15   | 22,4 | 0,7 | 4 | 2 | 20 | 2011 |
| 16,1 | 27,7 | 0,7 | 4 | 2 | 24 | 2001 |
| 16,1 | 27,7 | 0,7 | 3 | 2 | 20 | 2003 |
| 16,1 | 27,7 | 0,7 | 5 | 2 | 20 | 2003 |
| 15,6 | 25,2 | 0,7 | 3 | 2 | 23 | 2003 |
| 15,6 | 25,2 | 0,7 | 4 | 2 | 21 | 2015 |
| 13,6 | 16,7 | 0,7 | 3 | 2 | 23 | 1999 |
| 13,6 | 16,7 | 0,7 | 3 | 2 | 25 | 2005 |
| 12,7 | 13,6 | 0,7 | 3 | 2 | 23 | 2004 |
| 12,7 | 13,6 | 0,7 | 2 | 2 | 23 | 2007 |
| 17,1 | 33,2 | 0,7 | 5 | 2 | 18 | 2000 |

|      |      |     |   |   |    |      |
|------|------|-----|---|---|----|------|
| 17,1 | 33,2 | 0,7 | 6 | 2 | 19 | 2013 |
| 11,5 | 10,1 | 0,7 | 1 | 2 | 26 | 2001 |
| 11,5 | 10,1 | 0,7 | 3 | 2 | 25 | 2004 |
| 15,7 | 25,7 | 0,7 | 4 | 2 | 26 | 2001 |
| 15,8 | 26,2 | 0,7 | 5 | 2 | 18 | 2014 |
| 14,7 | 21,1 | 0,7 | 4 | 2 | 20 | 1999 |
| 14,7 | 21,1 | 0,7 | 3 | 2 | 21 | 2015 |
| 17,2 | 33,8 | 0,7 | 5 | 2 | 17 | 2002 |
| 17,2 | 33,8 | 0,7 | 5 | 2 | 18 | 2014 |
| 16,4 | 29,3 | 0,7 | 6 | 2 | 23 | 2005 |
| 17,4 | 35   | 0,7 | 5 | 2 | 19 | 2000 |
| 15,3 | 23,8 | 0,7 | 5 | 2 | 23 | 1999 |
| 15,3 | 23,8 | 0,7 | 5 | 2 | 22 | 2000 |
| 15,3 | 23,8 | 0,7 | 7 | 2 | 19 | 2012 |
| 13   | 14,6 | 0,7 | 3 | 2 | 19 | 2006 |
| 13   | 14,6 | 0,7 | 2 | 2 | 23 | 2007 |
| 13   | 14,6 | 0,7 | 2 | 2 | 21 | 2008 |
| 13   | 14,6 | 0,7 | 2 | 2 | 19 | 2009 |
| 13   | 14,6 | 0,7 | 2 | 2 | 21 | 2009 |

|      |      |     |   |   |    |      |
|------|------|-----|---|---|----|------|
| 11,9 | 11,2 | 0,7 | 1 | 2 | 26 | 2001 |
| 13,4 | 16   | 0,7 | 2 | 2 | 22 | 2000 |
| 13,4 | 16   | 0,7 | 2 | 2 | 23 | 2002 |
| 13,4 | 16   | 0,7 | 3 | 2 | 25 | 2003 |
| 13,4 | 16   | 0,7 | 2 | 2 | 19 | 2009 |
| 13,7 | 17,1 | 0,7 | 4 | 2 | 22 | 2004 |
| 16,9 | 32,1 | 0,7 | 6 | 2 | 19 | 2000 |
| 15,1 | 22,9 | 0,7 | 6 | 2 | 21 | 1999 |
| 15,1 | 22,9 | 0,7 | 3 | 2 | 22 | 2004 |
| 14,6 | 20,7 | 0,7 | 4 | 2 | 22 | 2004 |
| 14,6 | 20,7 | 0,7 | 3 | 2 | 19 | 2012 |
| 10,5 | 7,7  | 0,7 | 2 | 2 | 20 | 2004 |
| 18,2 | 40,1 | 0,7 | 7 | 2 | 18 | 2012 |
| 13,2 | 15,3 | 0,7 | 2 | 2 | 26 | 2000 |
| 13,2 | 15,3 | 0,7 | 3 | 2 | 25 | 2007 |
| 13,2 | 15,3 | 0,7 | 3 | 2 | 21 | 2014 |
| 11,3 | 9,6  | 0,7 | 2 | 2 | 25 | 2004 |
| 15,4 | 24,3 | 0,7 | 3 | 2 | 22 | 2001 |
| 15,4 | 24,3 | 0,7 | 5 | 2 | 21 | 2003 |

|      |      |     |   |   |    |      |
|------|------|-----|---|---|----|------|
| 15,4 | 24,3 | 0,7 | 4 | 2 | 23 | 2003 |
| 15,4 | 24,3 | 0,7 | 5 | 2 | 25 | 2005 |
| 12   | 11,5 | 0,7 | 2 | 2 | 19 | 2013 |
| 17   | 32,7 | 0,7 | 4 | 2 | 18 | 2015 |
| 12,5 | 13   | 0,7 | 2 | 2 | 19 | 2006 |
| 12,5 | 13   | 0,7 | 2 | 2 | 21 | 2013 |
| 12,5 | 13   | 0,7 | 2 | 2 | 22 | 2013 |
| 17,6 | 36,3 | 0,7 | 5 | 2 | 18 | 2000 |
| 17,6 | 36,3 | 0,7 | 4 | 2 | 19 | 2013 |
| 14,5 | 20,3 | 0,7 | 3 | 2 | 23 | 2004 |
| 14,5 | 20,3 | 0,7 | 3 | 2 | 22 | 2011 |
| 14,5 | 20,3 | 0,7 | 5 | 2 | 19 | 2013 |
| 14,5 | 20,3 | 0,7 | 3 | 2 | 21 | 2014 |
| 12,1 | 11,8 | 0,7 | 3 | 2 | 23 | 2005 |
| 12,1 | 11,8 | 0,7 | 2 | 2 | 21 | 2009 |
| 12,1 | 11,8 | 0,7 | 2 | 2 | 24 | 2009 |
| 12,1 | 11,8 | 0,7 | 2 | 2 | 23 | 2010 |
| 12,1 | 11,8 | 0,7 | 2 | 2 | 23 | 2010 |
| 16,1 | 27,8 | 0,7 | 3 | 2 | 24 | 2001 |

|      |      |     |    |   |    |      |
|------|------|-----|----|---|----|------|
| 16,1 | 27,8 | 0,7 | 4  | 2 | 26 | 2003 |
| 20,1 | 54,1 | 0,7 | 8  | 2 | 18 | 2012 |
| 20,1 | 54,1 | 0,7 | 10 | 2 | 19 | 2013 |
| 11,6 | 10,4 | 0,7 | 1  | 2 | 23 | 2015 |
| 14,8 | 21,6 | 0,7 | 5  | 2 | 21 | 2001 |
| 14,8 | 21,6 | 0,7 | 8  | 2 | 19 | 2011 |
| 14,8 | 21,6 | 0,7 | 3  | 2 | 19 | 2013 |
| 17,3 | 34,5 | 0,7 | 5  | 2 | 21 | 2000 |
| 15,2 | 23,4 | 0,7 | 8  | 2 | 17 | 2009 |
| 15,2 | 23,4 | 0,7 | 5  | 2 | 18 | 2012 |
| 12,2 | 12,1 | 0,7 | 2  | 2 | 23 | 2007 |
| 16,8 | 31,6 | 0,7 | 4  | 2 | 17 | 2002 |
| 14,4 | 19,9 | 0,7 | 4  | 2 | 24 | 2006 |
| 16   | 27,3 | 0,7 | 6  | 2 | 26 | 2006 |
| 16   | 27,3 | 0,7 | 5  | 2 | 20 | 2012 |
| 13,9 | 17,9 | 0,7 | 3  | 2 | 23 | 2010 |
| 13,9 | 17,9 | 0,7 | 3  | 2 | 23 | 2010 |
| 13,5 | 16,4 | 0,7 | 2  | 2 | 27 | 1999 |
| 13,5 | 16,4 | 0,7 | 3  | 2 | 19 | 2000 |

|      |      |     |   |   |    |      |
|------|------|-----|---|---|----|------|
| 13,5 | 16,4 | 0,7 | 5 | 2 | 19 | 2000 |
| 13,5 | 16,4 | 0,7 | 2 | 2 | 26 | 2001 |
| 13,5 | 16,4 | 0,7 | 2 | 2 | 26 | 2001 |
| 13,5 | 16,4 | 0,7 | 2 | 2 | 23 | 2008 |
| 15   | 22,5 | 0,7 | 6 | 2 | 19 | 2001 |
| 15   | 22,5 | 0,7 | 3 | 2 | 19 | 2012 |
| 15   | 22,5 | 0,7 | 4 | 2 | 15 | 2015 |
| 15,7 | 25,8 | 0,7 | 5 | 2 | 22 | 1999 |
| 15,7 | 25,8 | 0,7 | 5 | 2 | 23 | 1999 |
| 15,7 | 25,8 | 0,7 | 4 | 2 | 23 | 2002 |
| 15,9 | 26,8 | 0,7 | 4 | 2 | 21 | 2012 |
| 10,4 | 7,5  | 0,7 | 2 | 2 | 23 | 2004 |
| 16,6 | 30,5 | 0,7 | 7 | 2 | 19 | 2012 |
| 10,8 | 8,4  | 0,7 | 2 | 2 | 25 | 2004 |
| 14,3 | 19,5 | 0,7 | 3 | 2 | 23 | 2003 |
| 14,3 | 19,5 | 0,7 | 4 | 2 | 23 | 2003 |
| 14,3 | 19,5 | 0,7 | 2 | 2 | 23 | 2003 |
| 14,3 | 19,5 | 0,7 | 5 | 2 | 21 | 2012 |
| 14   | 18,3 | 0,7 | 4 | 2 | 26 | 1999 |

|      |      |     |   |   |    |      |
|------|------|-----|---|---|----|------|
| 14   | 18,3 | 0,7 | 3 | 2 | 18 | 2000 |
| 14   | 18,3 | 0,7 | 4 | 2 | 23 | 2008 |
| 14   | 18,3 | 0,7 | 4 | 2 | 20 | 2012 |
| 14   | 18,3 | 0,7 | 3 | 2 | 22 | 2015 |
| 18   | 38,9 | 0,7 | 5 | 2 | 20 | 2013 |
| 18   | 38,9 | 0,7 | 4 | 2 | 18 | 2015 |
| 14,2 | 19,1 | 0,7 | 5 | 2 | 22 | 1999 |
| 14,2 | 19,1 | 0,7 | 3 | 2 | 22 | 2000 |
| 14,2 | 19,1 | 0,7 | 7 | 2 | 21 | 2009 |
| 14,2 | 19,1 | 0,7 | 2 | 2 | 20 | 2013 |
| 14,1 | 18,7 | 0,7 | 4 | 2 | 23 | 1999 |
| 14,1 | 18,7 | 0,7 | 5 | 2 | 21 | 2009 |
| 14,1 | 18,7 | 0,7 | 3 | 2 | 19 | 2012 |
| 16,9 | 32,2 | 0,7 | 6 | 2 | 22 | 2013 |
| 13,1 | 15   | 0,7 | 2 | 2 | 25 | 2003 |
| 13,1 | 15   | 0,7 | 2 | 2 | 19 | 2009 |
| 15,3 | 23,9 | 0,7 | 3 | 2 | 17 | 2008 |
| 16,3 | 28,9 | 0,7 | 3 | 2 | 26 | 2001 |
| 16,3 | 28,9 | 0,7 | 4 | 2 | 18 | 2012 |

|      |      |     |    |   |    |      |
|------|------|-----|----|---|----|------|
| 16,3 | 28,9 | 0,7 | 6  | 2 | 21 | 2013 |
| 13,3 | 15,7 | 0,7 | 2  | 2 | 25 | 1999 |
| 13,3 | 15,7 | 0,7 | 3  | 2 | 19 | 2000 |
| 13,3 | 15,7 | 0,7 | 3  | 2 | 21 | 2008 |
| 19,1 | 46,5 | 0,7 | 7  | 2 | 17 | 2012 |
| 18,3 | 40,9 | 0,7 | 8  | 2 | 18 | 2015 |
| 14,7 | 21,2 | 0,7 | 4  | 2 | 20 | 2012 |
| 21,3 | 64,5 | 0,7 | 10 | 2 | 20 | 2013 |
| 13,6 | 16,8 | 0,7 | 2  | 2 | 27 | 1999 |
| 13,6 | 16,8 | 0,7 | 3  | 2 | 23 | 2006 |
| 13,6 | 16,8 | 0,7 | 2  | 2 | 20 | 2013 |
| 15,1 | 23   | 0,7 | 4  | 2 | 24 | 2001 |
| 15,1 | 23   | 0,7 | 5  | 2 | 23 | 2006 |
| 15,1 | 23   | 0,7 | 5  | 2 | 19 | 2008 |
| 15,1 | 23   | 0,7 | 4  | 2 | 20 | 2008 |
| 15,1 | 23   | 0,7 | 3  | 2 | 19 | 2012 |
| 11,7 | 10,7 | 0,7 | 2  | 2 | 20 | 2004 |
| 11,4 | 9,9  | 0,7 | 2  | 2 | 23 | 2004 |
| 19,2 | 47,3 | 0,7 | 7  | 2 | 18 | 2012 |

|      |      |     |   |   |    |      |
|------|------|-----|---|---|----|------|
| 16,8 | 31,7 | 0,7 | 5 | 2 | 20 | 2002 |
| 15,5 | 24,9 | 0,7 | 5 | 2 | 19 | 2000 |
| 11   | 8,9  | 0,7 | 2 | 2 | 23 | 2004 |
| 18   | 39   | 0,7 | 8 | 2 | 18 | 2015 |
| 13,7 | 17,2 | 0,7 | 4 | 2 | 26 | 1999 |
| 13,7 | 17,2 | 0,7 | 4 | 2 | 23 | 2009 |
| 13,7 | 17,2 | 0,7 | 4 | 2 | 19 | 2011 |
| 13,7 | 17,2 | 0,7 | 3 | 2 | 21 | 2011 |
| 16   | 27,4 | 0,7 | 3 | 2 | 20 | 2003 |
| 16   | 27,4 | 0,7 | 4 | 2 | 21 | 2013 |
| 16,6 | 30,6 | 0,7 | 4 | 2 | 18 | 2012 |
| 15,6 | 25,4 | 0,7 | 5 | 2 | 18 | 1999 |
| 15,6 | 25,4 | 0,7 | 5 | 2 | 18 | 1999 |
| 11,2 | 9,4  | 0,7 | 2 | 2 | 20 | 2004 |
| 11,2 | 9,4  | 0,7 | 2 | 2 | 25 | 2004 |
| 13   | 14,7 | 0,7 | 3 | 2 | 22 | 2013 |
| 13   | 14,7 | 0,7 | 2 | 2 | 18 | 2014 |
| 13,4 | 16,1 | 0,7 | 3 | 2 | 15 | 2015 |
| 14,5 | 20,4 | 0,7 | 3 | 2 | 22 | 2003 |

|      |      |     |   |   |    |      |
|------|------|-----|---|---|----|------|
| 15,2 | 23,5 | 0,7 | 4 | 2 | 26 | 2006 |
| 15,2 | 23,5 | 0,7 | 7 | 2 | 24 | 2009 |
| 15,2 | 23,5 | 0,7 | 5 | 2 | 19 | 2012 |
| 15,9 | 26,9 | 0,7 | 4 | 2 | 24 | 2002 |
| 15,7 | 25,9 | 0,7 | 5 | 2 | 20 | 1999 |
| 15,8 | 26,4 | 0,7 | 5 | 2 | 18 | 1999 |
| 13,2 | 15,4 | 0,7 | 3 | 2 | 25 | 1999 |
| 13,2 | 15,4 | 0,7 | 2 | 2 | 22 | 2000 |
| 13,2 | 15,4 | 0,7 | 3 | 2 | 25 | 2007 |
| 13,2 | 15,4 | 0,7 | 2 | 2 | 23 | 2009 |
| 15   | 22,6 | 0,7 | 3 | 2 | 20 | 2003 |
| 15   | 22,6 | 0,7 | 7 | 2 | 22 | 2011 |
| 15   | 22,6 | 0,7 | 4 | 2 | 19 | 2012 |
| 15   | 22,6 | 0,7 | 3 | 2 | 19 | 2013 |
| 16,3 | 29   | 0,7 | 5 | 2 | 18 | 1999 |
| 17   | 32,9 | 0,7 | 7 | 2 | 25 | 2002 |
| 17   | 32,9 | 0,7 | 5 | 2 | 19 | 2013 |
| 17   | 32,9 | 0,7 | 4 | 2 | 21 | 2013 |
| 19,2 | 47,4 | 0,7 | 5 | 2 | 18 | 2012 |

|      |      |     |    |   |    |      |
|------|------|-----|----|---|----|------|
| 13,8 | 17,6 | 0,7 | 3  | 2 | 25 | 2007 |
| 14,4 | 20   | 0,7 | 3  | 2 | 26 | 2000 |
| 12,6 | 13,4 | 0,7 | 3  | 2 | 25 | 2005 |
| 12,6 | 13,4 | 0,7 | 5  | 2 | 21 | 2012 |
| 16,5 | 30,1 | 0,7 | 5  | 2 | 17 | 2014 |
| 17,4 | 35,3 | 0,7 | 7  | 2 | 19 | 2012 |
| 17,4 | 35,3 | 0,7 | 5  | 2 | 18 | 2014 |
| 15,3 | 24   | 0,7 | 3  | 2 | 19 | 2000 |
| 15,3 | 24   | 0,7 | 4  | 2 | 26 | 2003 |
| 17,3 | 34,7 | 0,7 | 10 | 2 | 20 | 2013 |
| 14,3 | 19,6 | 0,7 | 3  | 2 | 26 | 2000 |
| 14,3 | 19,6 | 0,7 | 3  | 2 | 24 | 2002 |
| 14,3 | 19,6 | 0,7 | 2  | 2 | 20 | 2012 |
| 14,3 | 19,6 | 0,7 | 3  | 2 | 22 | 2015 |
| 14   | 18,4 | 0,7 | 2  | 2 | 19 | 2001 |
| 14   | 18,4 | 0,7 | 3  | 2 | 23 | 2002 |
| 14   | 18,4 | 0,7 | 3  | 2 | 21 | 2008 |
| 14,2 | 19,2 | 0,7 | 3  | 2 | 23 | 2007 |
| 14,2 | 19,2 | 0,7 | 5  | 2 | 25 | 2007 |

|      |      |     |   |   |    |      |
|------|------|-----|---|---|----|------|
| 11,9 | 11,3 | 0,7 | 2 | 2 | 19 | 2006 |
| 13,5 | 16,5 | 0,7 | 2 | 2 | 26 | 2000 |
| 13,5 | 16,5 | 0,7 | 3 | 2 | 22 | 2005 |
| 13,5 | 16,5 | 0,7 | 2 | 2 | 20 | 2013 |
| 19   | 46   | 0,7 | 6 | 2 | 19 | 2013 |
| 14,1 | 18,8 | 0,7 | 2 | 2 | 20 | 2003 |
| 11,5 | 10,2 | 0,7 | 2 | 2 | 20 | 2004 |
| 12,5 | 13,1 | 0,7 | 2 | 2 | 25 | 2007 |
| 12,5 | 13,1 | 0,7 | 2 | 2 | 22 | 2009 |
| 12,9 | 14,4 | 0,7 | 5 | 2 | 20 | 2012 |
| 15,4 | 24,5 | 0,7 | 5 | 2 | 26 | 2009 |
| 16,1 | 28   | 0,7 | 4 | 2 | 22 | 2009 |
| 15,1 | 23,1 | 0,7 | 5 | 2 | 19 | 1999 |
| 15,1 | 23,1 | 0,7 | 3 | 2 | 17 | 2014 |
| 16,4 | 29,6 | 0,7 | 5 | 2 | 22 | 2001 |
| 16,4 | 29,6 | 0,7 | 5 | 2 | 19 | 2013 |
| 12   | 11,6 | 0,7 | 2 | 2 | 23 | 2007 |
| 12   | 11,6 | 0,7 | 2 | 2 | 21 | 2008 |
| 12   | 11,6 | 0,7 | 2 | 2 | 23 | 2010 |

|      |      |     |   |   |    |      |
|------|------|-----|---|---|----|------|
| 12   | 11,6 | 0,7 | 2 | 2 | 23 | 2010 |
| 15,5 | 25   | 0,7 | 4 | 2 | 21 | 1999 |
| 15,5 | 25   | 0,7 | 5 | 2 | 22 | 2009 |
| 12,4 | 12,8 | 0,7 | 2 | 2 | 20 | 2013 |
| 12,4 | 12,8 | 0,7 | 2 | 2 | 19 | 2014 |
| 15,5 | 25   | 0,7 | 3 | 2 | 15 | 2015 |
| 16   | 27,5 | 0,7 | 4 | 2 | 21 | 2012 |
| 14,6 | 20,9 | 0,7 | 3 | 2 | 16 | 2008 |
| 13,3 | 15,8 | 0,7 | 2 | 2 | 23 | 2002 |
| 13,1 | 15,1 | 0,7 | 2 | 2 | 23 | 2002 |
| 13,1 | 15,1 | 0,7 | 4 | 2 | 23 | 2005 |
| 13,1 | 15,1 | 0,7 | 2 | 2 | 18 | 2014 |
| 13,1 | 15,1 | 0,7 | 3 | 2 | 19 | 2014 |
| 15,6 | 25,5 | 0,7 | 5 | 2 | 23 | 2003 |
| 12,1 | 11,9 | 0,7 | 2 | 2 | 23 | 2007 |
| 12,1 | 11,9 | 0,7 | 2 | 2 | 23 | 2007 |
| 13,6 | 16,9 | 0,7 | 2 | 2 | 26 | 2001 |
| 13,6 | 16,9 | 0,7 | 5 | 2 | 25 | 2007 |
| 15,7 | 26   | 0,7 | 7 | 2 | 19 | 2011 |

|      |      |     |   |   |    |      |
|------|------|-----|---|---|----|------|
| 15,8 | 26,5 | 0,7 | 8 | 2 | 23 | 2015 |
| 12,2 | 12,2 | 0,7 | 3 | 2 | 23 | 2007 |
| 12,2 | 12,2 | 0,7 | 2 | 2 | 26 | 2009 |
| 16,3 | 29,1 | 0,7 | 7 | 2 | 19 | 2013 |
| 15,2 | 23,6 | 0,7 | 5 | 2 | 20 | 2006 |
| 12,8 | 14,1 | 0,7 | 2 | 2 | 21 | 2000 |
| 12,8 | 14,1 | 0,7 | 2 | 2 | 17 | 2002 |
| 14,5 | 20,5 | 0,7 | 5 | 2 | 18 | 2000 |
| 14,5 | 20,5 | 0,7 | 5 | 2 | 20 | 2000 |
| 14,5 | 20,5 | 0,7 | 4 | 2 | 20 | 2011 |
| 14,5 | 20,5 | 0,7 | 4 | 2 | 20 | 2011 |
| 14,8 | 21,8 | 0,7 | 3 | 2 | 17 | 2008 |
| 15   | 22,7 | 0,7 | 3 | 2 | 23 | 2002 |
| 15   | 22,7 | 0,7 | 3 | 2 | 19 | 2006 |
| 17,7 | 37,3 | 0,7 | 4 | 2 | 16 | 2015 |
| 11,1 | 9,2  | 0,7 | 2 | 2 | 23 | 2005 |
| 16,2 | 28,6 | 0,7 | 6 | 2 | 18 | 2000 |
| 16,2 | 28,6 | 0,7 | 6 | 2 | 26 | 2001 |
| 16,2 | 28,6 | 0,7 | 5 | 2 | 19 | 2012 |

|      |      |     |   |   |    |      |
|------|------|-----|---|---|----|------|
| 16,2 | 28,6 | 0,7 | 5 | 2 | 17 | 2014 |
| 16,8 | 31,9 | 0,7 | 5 | 2 | 17 | 2012 |
| 13,7 | 17,3 | 0,7 | 2 | 2 | 22 | 2000 |
| 13,7 | 17,3 | 0,7 | 3 | 2 | 19 | 2009 |
| 15,3 | 24,1 | 0,7 | 4 | 2 | 22 | 2011 |
| 14,4 | 20,1 | 0,7 | 4 | 2 | 22 | 2011 |
| 13,4 | 16,2 | 0,7 | 2 | 2 | 19 | 2000 |
| 13,4 | 16,2 | 0,7 | 3 | 2 | 25 | 2007 |
| 13,4 | 16,2 | 0,7 | 3 | 2 | 15 | 2015 |
| 16,4 | 29,7 | 0,7 | 5 | 2 | 21 | 1999 |
| 16,6 | 30,8 | 0,7 | 6 | 2 | 23 | 2010 |
| 16,6 | 30,8 | 0,7 | 6 | 2 | 23 | 2010 |
| 13,8 | 17,7 | 0,7 | 3 | 2 | 23 | 2015 |
| 15,4 | 24,6 | 0,7 | 4 | 2 | 18 | 1999 |
| 15,4 | 24,6 | 0,7 | 5 | 2 | 24 | 2002 |
| 13   | 14,8 | 0,7 | 2 | 2 | 26 | 1999 |
| 13   | 14,8 | 0,7 | 3 | 2 | 25 | 2005 |
| 14,3 | 19,7 | 0,7 | 3 | 2 | 21 | 2000 |
| 14,3 | 19,7 | 0,7 | 4 | 2 | 23 | 2011 |

|      |      |     |   |   |    |      |
|------|------|-----|---|---|----|------|
| 14,3 | 19,7 | 0,7 | 3 | 2 | 19 | 2012 |
| 14,7 | 21,4 | 0,7 | 3 | 2 | 19 | 2002 |
| 12,7 | 13,8 | 0,7 | 2 | 2 | 19 | 2009 |
| 10,5 | 7,8  | 0,7 | 7 | 2 | 20 | 2004 |
| 10,5 | 7,8  | 0,7 | 2 | 2 | 23 | 2004 |
| 16   | 27,6 | 0,7 | 5 | 2 | 18 | 2012 |
| 15,1 | 23,2 | 0,7 | 4 | 2 | 22 | 2000 |
| 15,1 | 23,2 | 0,7 | 5 | 2 | 19 | 2012 |
| 15,1 | 23,2 | 0,7 | 4 | 2 | 19 | 2012 |
| 18   | 39,3 | 0,7 | 5 | 2 | 18 | 2012 |
| 13,2 | 15,5 | 0,7 | 3 | 2 | 24 | 2006 |
| 13,9 | 18,1 | 0,7 | 3 | 2 | 21 | 2008 |
| 14,2 | 19,3 | 0,7 | 3 | 2 | 17 | 2008 |
| 14,9 | 22,3 | 0,7 | 5 | 2 | 19 | 2012 |
| 14,9 | 22,3 | 0,7 | 3 | 2 | 21 | 2014 |
| 14,9 | 22,3 | 0,7 | 4 | 2 | 22 | 2015 |
| 14   | 18,5 | 0,7 | 4 | 2 | 21 | 1999 |
| 14   | 18,5 | 0,7 | 3 | 2 | 24 | 2002 |
| 14   | 18,5 | 0,7 | 2 | 2 | 23 | 2002 |

|      |      |     |   |   |    |      |
|------|------|-----|---|---|----|------|
| 14   | 18,5 | 0,7 | 2 | 2 | 23 | 2003 |
| 14   | 18,5 | 0,7 | 6 | 2 | 21 | 2008 |
| 14,1 | 18,9 | 0,7 | 3 | 2 | 17 | 2014 |
| 14,1 | 18,9 | 0,7 | 4 | 2 | 22 | 2015 |
| 11,7 | 10,8 | 0,7 | 2 | 2 | 22 | 2000 |
| 11,7 | 10,8 | 0,7 | 2 | 2 | 25 | 2004 |
| 11,7 | 10,8 | 0,7 | 2 | 2 | 25 | 2004 |
| 15,6 | 25,6 | 0,7 | 6 | 2 | 25 | 2004 |
| 15,6 | 25,6 | 0,7 | 4 | 2 | 18 | 2008 |
| 13,5 | 16,6 | 0,7 | 2 | 2 | 18 | 2002 |
| 13,5 | 16,6 | 0,7 | 4 | 2 | 19 | 2009 |
| 21,8 | 69,9 | 0,7 | 7 | 2 | 18 | 2012 |
| 10,8 | 8,5  | 0,7 | 1 | 2 | 26 | 2001 |
| 14,6 | 21   | 0,7 | 3 | 2 | 23 | 2007 |
| 15,2 | 23,7 | 0,7 | 4 | 2 | 22 | 2013 |
| 12,6 | 13,5 | 0,7 | 2 | 2 | 25 | 2007 |
| 12,6 | 13,5 | 0,7 | 2 | 2 | 21 | 2013 |
| 11,4 | 10   | 0,7 | 2 | 2 | 25 | 2005 |
| 16,2 | 28,7 | 0,7 | 5 | 2 | 18 | 2008 |

|      |      |     |   |   |    |      |
|------|------|-----|---|---|----|------|
| 14,8 | 21,9 | 0,7 | 3 | 2 | 19 | 1999 |
| 14,8 | 21,9 | 0,7 | 4 | 2 | 24 | 2006 |
| 15   | 22,8 | 0,7 | 3 | 2 | 25 | 2007 |
| 15   | 22,8 | 0,7 | 4 | 2 | 21 | 2011 |
| 11,8 | 11,1 | 0,7 | 2 | 2 | 25 | 2007 |
| 18   | 39,4 | 0,7 | 5 | 2 | 19 | 2013 |
| 16,4 | 29,8 | 0,7 | 7 | 2 | 19 | 2012 |
| 15,3 | 24,2 | 0,7 | 3 | 2 | 19 | 2013 |
| 14,5 | 20,6 | 0,7 | 3 | 2 | 21 | 2003 |
| 14,5 | 20,6 | 0,7 | 7 | 2 | 24 | 2009 |
| 16,1 | 28,2 | 0,7 | 6 | 2 | 20 | 2011 |
| 13,3 | 15,9 | 0,7 | 2 | 2 | 22 | 2000 |
| 13,3 | 15,9 | 0,7 | 3 | 2 | 22 | 2005 |
| 13,3 | 15,9 | 0,7 | 3 | 2 | 23 | 2010 |
| 13,3 | 15,9 | 0,7 | 3 | 2 | 23 | 2010 |
| 13,3 | 15,9 | 0,7 | 3 | 2 | 15 | 2015 |
| 17,1 | 33,8 | 0,7 | 3 | 2 | 18 | 2012 |
| 13,1 | 15,2 | 0,7 | 2 | 2 | 26 | 2006 |
| 11   | 9    | 0,7 | 2 | 2 | 22 | 2004 |

|      |      |     |   |   |    |      |
|------|------|-----|---|---|----|------|
| 11   | 9    | 0,7 | 2 | 2 | 23 | 2004 |
| 16   | 27,7 | 0,7 | 4 | 2 | 18 | 2000 |
| 16   | 27,7 | 0,7 | 4 | 2 | 23 | 2002 |
| 16   | 27,7 | 0,7 | 4 | 2 | 19 | 2011 |
| 16   | 27,7 | 0,7 | 6 | 2 | 20 | 2013 |
| 15,4 | 24,7 | 0,7 | 6 | 2 | 24 | 2001 |
| 15,4 | 24,7 | 0,7 | 3 | 2 | 21 | 2003 |
| 15,4 | 24,7 | 0,7 | 7 | 2 | 26 | 2006 |
| 14,4 | 20,2 | 0,7 | 2 | 2 | 27 | 1999 |
| 14,4 | 20,2 | 0,7 | 3 | 2 | 22 | 2003 |
| 14,4 | 20,2 | 0,7 | 4 | 2 | 24 | 2009 |
| 11,9 | 11,4 | 0,7 | 2 | 2 | 25 | 2008 |
| 17,9 | 38,8 | 0,7 | 5 | 2 | 19 | 2012 |
| 15,9 | 27,2 | 0,7 | 5 | 2 | 18 | 1999 |
| 13,7 | 17,4 | 0,7 | 2 | 2 | 26 | 2000 |
| 13,7 | 17,4 | 0,7 | 4 | 2 | 22 | 2001 |
| 13,7 | 17,4 | 0,7 | 2 | 2 | 25 | 2005 |
| 15,5 | 25,2 | 0,7 | 4 | 2 | 19 | 2000 |
| 15,1 | 23,3 | 0,7 | 5 | 2 | 21 | 1999 |

|      |      |     |    |   |    |      |
|------|------|-----|----|---|----|------|
| 15,1 | 23,3 | 0,7 | 3  | 2 | 18 | 2012 |
| 15,1 | 23,3 | 0,7 | 4  | 2 | 21 | 2012 |
| 12   | 11,7 | 0,7 | 2  | 2 | 23 | 2005 |
| 14,3 | 19,8 | 0,7 | 5  | 2 | 26 | 2000 |
| 14,3 | 19,8 | 0,7 | 4  | 2 | 25 | 2004 |
| 12,8 | 14,2 | 0,7 | 2  | 2 | 22 | 2002 |
| 12,8 | 14,2 | 0,7 | 2  | 2 | 19 | 2006 |
| 14,9 | 22,4 | 0,7 | 4  | 2 | 20 | 2011 |
| 10,3 | 7,4  | 0,7 | 2  | 2 | 23 | 2004 |
| 13,8 | 17,8 | 0,7 | 3  | 2 | 25 | 2005 |
| 13,8 | 17,8 | 0,7 | 3  | 2 | 20 | 2009 |
| 12,2 | 12,3 | 0,7 | 3  | 2 | 23 | 2007 |
| 16,2 | 28,8 | 0,7 | 6  | 2 | 19 | 2011 |
| 16,2 | 28,8 | 0,7 | 4  | 2 | 19 | 2012 |
| 13,4 | 16,3 | 0,7 | 2  | 2 | 22 | 2000 |
| 13,4 | 16,3 | 0,7 | 3  | 2 | 23 | 2008 |
| 13,4 | 16,3 | 0,7 | 3  | 2 | 25 | 2008 |
| 20   | 54,2 | 0,7 | 10 | 2 | 22 | 2013 |
| 10,7 | 8,3  | 0,7 | 2  | 2 | 23 | 2004 |

|      |      |     |   |   |    |      |
|------|------|-----|---|---|----|------|
| 10,7 | 8,3  | 0,7 | 2 | 2 | 25 | 2004 |
| 14,2 | 19,4 | 0,7 | 3 | 2 | 23 | 2001 |
| 14,2 | 19,4 | 0,7 | 4 | 2 | 20 | 2011 |
| 14,2 | 19,4 | 0,7 | 3 | 2 | 21 | 2014 |
| 14,2 | 19,4 | 0,7 | 3 | 2 | 23 | 2014 |
| 16,6 | 31   | 0,7 | 4 | 2 | 20 | 2003 |
| 15,2 | 23,8 | 0,7 | 4 | 2 | 24 | 2001 |
| 15,2 | 23,8 | 0,7 | 3 | 2 | 24 | 2002 |
| 15,2 | 23,8 | 0,7 | 4 | 2 | 17 | 2012 |
| 14,1 | 19   | 0,7 | 3 | 2 | 19 | 2000 |
| 14,1 | 19   | 0,7 | 3 | 2 | 23 | 2002 |
| 14,1 | 19   | 0,7 | 6 | 2 | 18 | 2008 |
| 17   | 33,3 | 0,7 | 4 | 2 | 19 | 2014 |
| 14   | 18,6 | 0,7 | 5 | 2 | 23 | 1999 |
| 17,3 | 35,1 | 0,7 | 5 | 2 | 19 | 2014 |
| 14,6 | 21,1 | 0,7 | 5 | 2 | 27 | 1999 |
| 14,6 | 21,1 | 0,7 | 4 | 2 | 20 | 2011 |
| 16,1 | 28,3 | 0,7 | 4 | 2 | 22 | 2003 |
| 16,1 | 28,3 | 0,7 | 6 | 2 | 23 | 2003 |

|      |      |     |   |   |    |      |
|------|------|-----|---|---|----|------|
| 16,1 | 28,3 | 0,7 | 6 | 2 | 23 | 2007 |
| 13   | 14,9 | 0,7 | 5 | 2 | 25 | 1999 |
| 13   | 14,9 | 0,7 | 3 | 2 | 23 | 2008 |
| 13   | 14,9 | 0,7 | 4 | 2 | 24 | 2009 |
| 13   | 14,9 | 0,7 | 2 | 2 | 22 | 2011 |
| 13,2 | 15,6 | 0,7 | 5 | 2 | 26 | 1999 |
| 13,2 | 15,6 | 0,7 | 2 | 2 | 26 | 2000 |
| 13,2 | 15,6 | 0,7 | 2 | 2 | 23 | 2006 |
| 13,2 | 15,6 | 0,7 | 4 | 2 | 22 | 2009 |
| 13,2 | 15,6 | 0,7 | 3 | 2 | 23 | 2011 |
| 15,3 | 24,3 | 0,7 | 6 | 2 | 22 | 2001 |
| 15,3 | 24,3 | 0,7 | 4 | 2 | 23 | 2002 |
| 15,3 | 24,3 | 0,7 | 5 | 2 | 25 | 2004 |
| 15   | 22,9 | 0,7 | 4 | 2 | 20 | 1999 |
| 15   | 22,9 | 0,7 | 8 | 2 | 23 | 2008 |
| 12,7 | 13,9 | 0,7 | 4 | 2 | 20 | 2006 |
| 12,7 | 13,9 | 0,7 | 2 | 2 | 20 | 2013 |
| 12,7 | 13,9 | 0,7 | 2 | 2 | 21 | 2014 |
| 14,8 | 22   | 0,7 | 5 | 2 | 25 | 1999 |

|      |      |     |   |   |    |      |
|------|------|-----|---|---|----|------|
| 14,8 | 22   | 0,7 | 4 | 2 | 26 | 2001 |
| 14,8 | 22   | 0,7 | 3 | 2 | 23 | 2003 |
| 16   | 27,8 | 0,7 | 8 | 2 | 25 | 2008 |
| 13,5 | 16,7 | 0,7 | 3 | 2 | 20 | 2002 |
| 13,5 | 16,7 | 0,7 | 4 | 2 | 25 | 2004 |
| 13,5 | 16,7 | 0,7 | 3 | 2 | 23 | 2009 |
| 16,3 | 29,4 | 0,7 | 5 | 2 | 18 | 2012 |
| 18   | 39,6 | 0,7 | 7 | 2 | 19 | 2013 |
| 16,8 | 32,2 | 0,7 | 5 | 2 | 18 | 2000 |
| 11,6 | 10,6 | 0,7 | 2 | 2 | 23 | 2004 |
| 11,3 | 9,8  | 0,7 | 2 | 2 | 23 | 2004 |
| 15,8 | 26,8 | 0,7 | 6 | 2 | 24 | 2001 |
| 15,6 | 25,8 | 0,7 | 5 | 2 | 23 | 1999 |
| 15,7 | 26,3 | 0,7 | 5 | 2 | 22 | 2001 |
| 15,7 | 26,3 | 0,7 | 5 | 2 | 23 | 2003 |
| 15,1 | 23,4 | 0,7 | 5 | 2 | 25 | 2003 |
| 15,1 | 23,4 | 0,7 | 3 | 2 | 18 | 2012 |
| 13,6 | 17,1 | 0,7 | 2 | 2 | 20 | 2000 |
| 13,6 | 17,1 | 0,7 | 2 | 2 | 22 | 2000 |

|      |      |     |   |   |    |      |
|------|------|-----|---|---|----|------|
| 13,6 | 17,1 | 0,7 | 3 | 2 | 21 | 2003 |
| 13,6 | 17,1 | 0,7 | 2 | 2 | 25 | 2003 |
| 17   | 33,4 | 0,7 | 5 | 2 | 19 | 2013 |
| 14,4 | 20,3 | 0,7 | 3 | 2 | 19 | 2012 |
| 12,6 | 13,6 | 0,7 | 2 | 2 | 20 | 2002 |
| 12,6 | 13,6 | 0,7 | 2 | 2 | 20 | 2002 |
| 12,6 | 13,6 | 0,7 | 2 | 2 | 26 | 2009 |
| 14,7 | 21,6 | 0,7 | 4 | 2 | 19 | 2012 |
| 11,1 | 9,3  | 0,7 | 2 | 2 | 25 | 2004 |
| 13,3 | 16   | 0,7 | 2 | 2 | 19 | 2012 |
| 18,2 | 41   | 0,7 | 6 | 2 | 19 | 2013 |
| 12,9 | 14,6 | 0,7 | 2 | 2 | 17 | 2008 |
| 16,4 | 30   | 0,7 | 5 | 2 | 26 | 2001 |
| 14,9 | 22,5 | 0,7 | 5 | 2 | 25 | 2007 |
| 14,3 | 19,9 | 0,7 | 4 | 2 | 15 | 2015 |
| 14,3 | 19,9 | 0,7 | 3 | 2 | 22 | 2015 |
| 15,2 | 23,9 | 0,7 | 4 | 2 | 21 | 2000 |
| 15,2 | 23,9 | 0,7 | 3 | 2 | 20 | 2001 |
| 11,7 | 10,9 | 0,7 | 1 | 2 | 22 | 2009 |

|      |      |     |   |   |    |      |
|------|------|-----|---|---|----|------|
| 13,7 | 17,5 | 0,7 | 2 | 2 | 23 | 2002 |
| 13,1 | 15,3 | 0,7 | 4 | 2 | 24 | 2009 |
| 13,1 | 15,3 | 0,7 | 2 | 2 | 21 | 2014 |
| 20,2 | 56,1 | 0,7 | 4 | 2 | 18 | 2012 |
| 16,7 | 31,7 | 0,7 | 5 | 2 | 19 | 2000 |
| 12,5 | 13,3 | 0,7 | 3 | 2 | 22 | 2005 |
| 14,2 | 19,5 | 0,7 | 4 | 2 | 24 | 2006 |
| 14,2 | 19,5 | 0,7 | 4 | 2 | 25 | 2008 |
| 13,8 | 17,9 | 0,7 | 4 | 2 | 21 | 2006 |
| 13,8 | 17,9 | 0,7 | 2 | 2 | 22 | 2009 |
| 13,8 | 17,9 | 0,7 | 3 | 2 | 20 | 2011 |
| 16,5 | 30,6 | 0,7 | 6 | 2 | 23 | 2003 |
| 14,6 | 21,2 | 0,7 | 6 | 2 | 20 | 2011 |
| 14,6 | 21,2 | 0,7 | 3 | 2 | 20 | 2011 |
| 15,3 | 24,4 | 0,7 | 4 | 2 | 20 | 1999 |
| 15,3 | 24,4 | 0,7 | 3 | 2 | 23 | 2002 |
| 14,1 | 19,1 | 0,7 | 3 | 2 | 22 | 2007 |
| 14,1 | 19,1 | 0,7 | 4 | 2 | 21 | 2009 |
| 14,1 | 19,1 | 0,7 | 4 | 2 | 24 | 2009 |

|      |      |     |   |   |    |      |
|------|------|-----|---|---|----|------|
| 15   | 23   | 0,7 | 5 | 2 | 18 | 2000 |
| 15   | 23   | 0,7 | 3 | 2 | 19 | 2013 |
| 14   | 18,7 | 0,7 | 5 | 2 | 26 | 2000 |
| 14   | 18,7 | 0,7 | 3 | 2 | 19 | 2006 |
| 14   | 18,7 | 0,7 | 3 | 2 | 21 | 2014 |
| 13,4 | 16,4 | 0,7 | 3 | 2 | 25 | 2005 |
| 17,7 | 37,8 | 0,7 | 7 | 2 | 21 | 2003 |
| 11,4 | 10,1 | 0,7 | 2 | 2 | 22 | 2007 |
| 14,8 | 22,1 | 0,7 | 4 | 2 | 24 | 2006 |
| 15,4 | 24,9 | 0,7 | 6 | 2 | 18 | 2008 |
| 12,4 | 13   | 0,7 | 2 | 2 | 20 | 2000 |
| 12,4 | 13   | 0,7 | 3 | 2 | 25 | 2004 |
| 17,1 | 34,1 | 0,7 | 8 | 2 | 19 | 2013 |
| 15,8 | 26,9 | 0,7 | 4 | 2 | 23 | 2002 |
| 15,8 | 26,9 | 0,7 | 4 | 2 | 23 | 2005 |
| 15,8 | 26,9 | 0,7 | 6 | 2 | 20 | 2011 |
| 15,5 | 25,4 | 0,7 | 5 | 2 | 18 | 1999 |
| 15,5 | 25,4 | 0,7 | 4 | 2 | 20 | 1999 |
| 15,5 | 25,4 | 0,7 | 3 | 2 | 23 | 2001 |

|      |      |     |   |   |    |      |
|------|------|-----|---|---|----|------|
| 15,7 | 26,4 | 0,7 | 4 | 2 | 21 | 1999 |
| 15,6 | 25,9 | 0,7 | 3 | 2 | 21 | 2003 |
| 14,5 | 20,8 | 0,7 | 3 | 2 | 23 | 2002 |
| 14,5 | 20,8 | 0,7 | 3 | 2 | 21 | 2012 |
| 16,4 | 30,1 | 0,7 | 6 | 2 | 20 | 2013 |
| 19,2 | 48,3 | 0,7 | 6 | 2 | 22 | 2013 |
| 10,5 | 7,9  | 0,7 | 2 | 2 | 20 | 2004 |
| 10,5 | 7,9  | 0,7 | 2 | 2 | 25 | 2004 |
| 12,3 | 12,7 | 0,7 | 2 | 2 | 19 | 2011 |
| 15,1 | 23,5 | 0,7 | 5 | 2 | 20 | 2013 |
| 13,2 | 15,7 | 0,7 | 3 | 2 | 26 | 2005 |
| 13,2 | 15,7 | 0,7 | 3 | 2 | 20 | 2011 |
| 13   | 15   | 0,7 | 3 | 2 | 25 | 2007 |
| 13   | 15   | 0,7 | 3 | 2 | 25 | 2007 |
| 16,7 | 31,8 | 0,7 | 4 | 2 | 20 | 2011 |
| 13,5 | 16,8 | 0,7 | 2 | 2 | 22 | 2000 |
| 13,5 | 16,8 | 0,7 | 4 | 2 | 24 | 2009 |
| 12   | 11,8 | 0,7 | 2 | 2 | 22 | 2007 |
| 12   | 11,8 | 0,7 | 2 | 2 | 23 | 2007 |

|      |      |     |    |   |    |      |
|------|------|-----|----|---|----|------|
| 12,2 | 12,4 | 0,7 | 2  | 2 | 22 | 2000 |
| 14,7 | 21,7 | 0,7 | 4  | 2 | 20 | 1999 |
| 14,7 | 21,7 | 0,7 | 6  | 2 | 20 | 1999 |
| 11,2 | 9,6  | 0,7 | 2  | 2 | 17 | 2014 |
| 15,2 | 24   | 0,7 | 4  | 2 | 19 | 2000 |
| 18,2 | 41,2 | 0,7 | 5  | 2 | 17 | 2012 |
| 16,5 | 30,7 | 0,7 | 5  | 2 | 17 | 2012 |
| 12,7 | 14   | 0,7 | 3  | 2 | 15 | 2015 |
| 18,7 | 44,7 | 0,7 | 10 | 2 | 16 | 2015 |
| 17,3 | 35,4 | 0,7 | 5  | 2 | 19 | 2000 |
| 17,3 | 35,4 | 0,7 | 5  | 2 | 20 | 2013 |
| 13,6 | 17,2 | 0,7 | 2  | 2 | 22 | 2000 |
| 17   | 33,6 | 0,7 | 9  | 2 | 17 | 2012 |
| 14,3 | 20   | 0,7 | 6  | 2 | 26 | 1999 |
| 14,3 | 20   | 0,7 | 3  | 2 | 21 | 2015 |
| 15,9 | 27,5 | 0,7 | 5  | 2 | 19 | 2013 |
| 16,6 | 31,3 | 0,7 | 6  | 2 | 22 | 2001 |
| 14,6 | 21,3 | 0,7 | 4  | 2 | 23 | 1999 |
| 14,6 | 21,3 | 0,7 | 3  | 2 | 22 | 2000 |

|      |      |     |   |   |    |      |
|------|------|-----|---|---|----|------|
| 14,6 | 21,3 | 0,7 | 2 | 2 | 19 | 2000 |
| 15   | 23,1 | 0,7 | 5 | 2 | 19 | 2007 |
| 15   | 23,1 | 0,7 | 4 | 2 | 25 | 2007 |
| 15   | 23,1 | 0,7 | 4 | 2 | 20 | 2011 |
| 16,2 | 29,1 | 0,7 | 6 | 2 | 22 | 2011 |
| 16,2 | 29,1 | 0,7 | 7 | 2 | 17 | 2012 |
| 13,7 | 17,6 | 0,7 | 3 | 2 | 21 | 2000 |
| 13,7 | 17,6 | 0,7 | 2 | 2 | 18 | 2002 |
| 13,7 | 17,6 | 0,7 | 2 | 2 | 23 | 2002 |
| 13,7 | 17,6 | 0,7 | 4 | 2 | 15 | 2015 |
| 10,4 | 7,7  | 0,7 | 1 | 2 | 26 | 2001 |
| 10,4 | 7,7  | 0,7 | 2 | 2 | 23 | 2004 |
| 15,8 | 27   | 0,7 | 5 | 2 | 25 | 1999 |
| 15,8 | 27   | 0,7 | 4 | 2 | 22 | 2011 |
| 16,4 | 30,2 | 0,7 | 6 | 2 | 19 | 2012 |
| 15,5 | 25,5 | 0,7 | 4 | 2 | 19 | 2001 |
| 15,7 | 26,5 | 0,7 | 4 | 2 | 21 | 1999 |
| 15,7 | 26,5 | 0,7 | 7 | 2 | 26 | 1999 |
| 15,7 | 26,5 | 0,7 | 4 | 2 | 19 | 2012 |

|      |      |     |   |   |    |      |
|------|------|-----|---|---|----|------|
| 12,9 | 14,7 | 0,7 | 3 | 2 | 23 | 2005 |
| 15,6 | 26   | 0,7 | 8 | 2 | 20 | 2013 |
| 12,6 | 13,7 | 0,7 | 2 | 2 | 26 | 2009 |
| 13,8 | 18   | 0,7 | 2 | 2 | 26 | 2000 |
| 14,1 | 19,2 | 0,7 | 4 | 2 | 24 | 2006 |
| 13,1 | 15,4 | 0,7 | 3 | 2 | 22 | 2013 |
| 18,2 | 41,3 | 0,7 | 7 | 2 | 19 | 2012 |
| 14   | 18,8 | 0,7 | 4 | 2 | 26 | 1999 |
| 14   | 18,8 | 0,7 | 3 | 2 | 20 | 2001 |
| 14   | 18,8 | 0,7 | 3 | 2 | 22 | 2004 |
| 14   | 18,8 | 0,7 | 4 | 2 | 25 | 2007 |
| 15,1 | 23,6 | 0,7 | 3 | 2 | 20 | 2003 |
| 14,5 | 20,9 | 0,7 | 4 | 2 | 26 | 1999 |
| 14,5 | 20,9 | 0,7 | 4 | 2 | 24 | 2002 |
| 14,5 | 20,9 | 0,7 | 3 | 2 | 25 | 2004 |
| 14,5 | 20,9 | 0,7 | 3 | 2 | 18 | 2012 |
| 16,5 | 30,8 | 0,7 | 7 | 2 | 23 | 2011 |
| 10,7 | 8,4  | 0,7 | 2 | 2 | 23 | 2004 |
| 13,4 | 16,5 | 0,7 | 2 | 2 | 23 | 2002 |

|      |      |     |   |   |    |      |
|------|------|-----|---|---|----|------|
| 13,4 | 16,5 | 0,7 | 3 | 2 | 25 | 2005 |
| 18,9 | 46,3 | 0,7 | 5 | 2 | 22 | 2013 |
| 17,1 | 34,3 | 0,7 | 7 | 2 | 24 | 2009 |
| 16   | 28,1 | 0,7 | 4 | 2 | 21 | 2003 |
| 12,5 | 13,4 | 0,7 | 3 | 2 | 21 | 2005 |
| 12,5 | 13,4 | 0,7 | 2 | 2 | 20 | 2013 |
| 12,5 | 13,4 | 0,7 | 2 | 2 | 19 | 2014 |
| 11,3 | 9,9  | 0,7 | 2 | 2 | 25 | 2004 |
| 11,3 | 9,9  | 0,7 | 2 | 2 | 25 | 2004 |
| 16,6 | 31,4 | 0,7 | 8 | 2 | 23 | 2003 |
| 14,4 | 20,5 | 0,7 | 3 | 2 | 24 | 2002 |
| 14,4 | 20,5 | 0,7 | 4 | 2 | 17 | 2012 |
| 14,4 | 20,5 | 0,7 | 3 | 2 | 23 | 2015 |
| 12,8 | 14,4 | 0,7 | 2 | 2 | 23 | 1999 |
| 12,8 | 14,4 | 0,7 | 2 | 2 | 25 | 2008 |
| 15,3 | 24,6 | 0,7 | 5 | 2 | 19 | 2012 |
| 13,5 | 16,9 | 0,7 | 2 | 2 | 24 | 2009 |
| 16,7 | 32   | 0,7 | 6 | 2 | 23 | 2004 |
| 16,7 | 32   | 0,7 | 5 | 2 | 19 | 2013 |

|      |      |     |   |   |    |      |
|------|------|-----|---|---|----|------|
| 12,4 | 13,1 | 0,7 | 2 | 2 | 21 | 2014 |
| 18,9 | 46,4 | 0,7 | 7 | 2 | 19 | 2012 |
| 13   | 15,1 | 0,7 | 2 | 2 | 26 | 2009 |
| 15,7 | 26,6 | 0,7 | 3 | 2 | 22 | 2001 |
| 14,3 | 20,1 | 0,7 | 3 | 2 | 25 | 2003 |
| 15   | 23,2 | 0,7 | 4 | 2 | 18 | 2000 |
| 15   | 23,2 | 0,7 | 4 | 2 | 20 | 2011 |
| 15,5 | 25,6 | 0,7 | 3 | 2 | 19 | 2000 |
| 15,5 | 25,6 | 0,7 | 4 | 2 | 19 | 2012 |
| 16,8 | 32,6 | 0,7 | 5 | 2 | 20 | 2013 |
| 13,6 | 17,3 | 0,7 | 3 | 2 | 24 | 2002 |
| 16,9 | 33,2 | 0,7 | 5 | 2 | 17 | 2012 |
| 17,2 | 35   | 0,7 | 5 | 2 | 19 | 2000 |
| 12,3 | 12,8 | 0,7 | 3 | 2 | 23 | 2007 |
| 12,3 | 12,8 | 0,7 | 2 | 2 | 25 | 2007 |
| 12,3 | 12,8 | 0,7 | 2 | 2 | 22 | 2011 |
| 14,8 | 22,3 | 0,7 | 4 | 2 | 24 | 2006 |
| 17   | 33,8 | 0,7 | 4 | 2 | 21 | 2013 |
| 17,1 | 34,4 | 0,7 | 7 | 2 | 19 | 2012 |

|      |      |     |    |   |    |      |
|------|------|-----|----|---|----|------|
| 14,2 | 19,7 | 0,7 | 3  | 2 | 17 | 2008 |
| 14,2 | 19,7 | 0,7 | 3  | 2 | 17 | 2012 |
| 16,3 | 29,8 | 0,7 | 6  | 2 | 25 | 1999 |
| 16,3 | 29,8 | 0,7 | 6  | 2 | 22 | 2001 |
| 16,3 | 29,8 | 0,7 | 4  | 2 | 19 | 2012 |
| 19   | 47,2 | 0,7 | 4  | 2 | 16 | 2015 |
| 12,7 | 14,1 | 0,7 | 2  | 2 | 20 | 2002 |
| 12,7 | 14,1 | 0,7 | 2  | 2 | 24 | 2009 |
| 12,7 | 14,1 | 0,7 | 2  | 2 | 20 | 2013 |
| 11,9 | 11,6 | 0,7 | 4  | 2 | 26 | 2006 |
| 15,1 | 23,7 | 0,7 | 5  | 2 | 26 | 2000 |
| 15,1 | 23,7 | 0,7 | 4  | 2 | 22 | 2013 |
| 12,2 | 12,5 | 0,7 | 2  | 2 | 20 | 2004 |
| 12,2 | 12,5 | 0,7 | 3  | 2 | 23 | 2005 |
| 11,4 | 10,2 | 0,7 | 2  | 2 | 26 | 2009 |
| 14,1 | 19,3 | 0,7 | 2  | 2 | 26 | 2000 |
| 14,1 | 19,3 | 0,7 | 4  | 2 | 23 | 2006 |
| 14,1 | 19,3 | 0,7 | 3  | 2 | 18 | 2008 |
| 17,5 | 36,9 | 0,7 | 10 | 2 | 21 | 2013 |

|      |      |     |   |   |    |      |
|------|------|-----|---|---|----|------|
| 13,3 | 16,2 | 0,7 | 2 | 2 | 22 | 2002 |
| 13,3 | 16,2 | 0,7 | 4 | 2 | 23 | 2008 |
| 13,3 | 16,2 | 0,7 | 6 | 2 | 24 | 2009 |
| 18,5 | 43,6 | 0,7 | 6 | 2 | 22 | 2013 |
| 12   | 11,9 | 0,7 | 2 | 2 | 19 | 2000 |
| 12   | 11,9 | 0,7 | 2 | 2 | 23 | 2005 |
| 12,1 | 12,2 | 0,7 | 2 | 2 | 23 | 2007 |
| 12,1 | 12,2 | 0,7 | 2 | 2 | 25 | 2007 |
| 13,8 | 18,1 | 0,7 | 5 | 2 | 19 | 2012 |
| 14,5 | 21   | 0,7 | 3 | 2 | 18 | 2000 |
| 21   | 63,8 | 0,7 | 7 | 2 | 18 | 2012 |
| 15,2 | 24,2 | 0,7 | 3 | 2 | 19 | 2013 |
| 16,2 | 29,3 | 0,7 | 4 | 2 | 22 | 2001 |
| 16,2 | 29,3 | 0,7 | 6 | 2 | 20 | 2013 |
| 16,7 | 32,1 | 0,7 | 6 | 2 | 19 | 2013 |
| 14,7 | 21,9 | 0,7 | 5 | 2 | 24 | 2002 |
| 14,7 | 21,9 | 0,7 | 3 | 2 | 23 | 2002 |
| 14,7 | 21,9 | 0,7 | 3 | 2 | 22 | 2004 |
| 13,1 | 15,5 | 0,7 | 3 | 2 | 23 | 2010 |

|      |      |     |    |   |    |      |
|------|------|-----|----|---|----|------|
| 13,1 | 15,5 | 0,7 | 3  | 2 | 23 | 2010 |
| 15,8 | 27,2 | 0,7 | 3  | 2 | 20 | 2003 |
| 15,3 | 24,7 | 0,7 | 4  | 2 | 24 | 2002 |
| 18,1 | 40,9 | 0,7 | 4  | 2 | 19 | 2012 |
| 12,6 | 13,8 | 0,7 | 2  | 2 | 25 | 2007 |
| 14,4 | 20,6 | 0,7 | 3  | 2 | 25 | 2005 |
| 13,4 | 16,6 | 0,7 | 4  | 2 | 18 | 2015 |
| 15,4 | 25,2 | 0,7 | 3  | 2 | 25 | 2003 |
| 15,4 | 25,2 | 0,7 | 5  | 2 | 19 | 2011 |
| 20   | 55,2 | 0,7 | 6  | 2 | 15 | 2015 |
| 16,5 | 31   | 0,7 | 6  | 2 | 24 | 2001 |
| 15,5 | 25,7 | 0,7 | 5  | 2 | 18 | 1999 |
| 15   | 23,3 | 0,7 | 5  | 2 | 23 | 2002 |
| 15   | 23,3 | 0,7 | 3  | 2 | 26 | 2003 |
| 15   | 23,3 | 0,7 | 7  | 2 | 19 | 2012 |
| 11,5 | 10,5 | 0,7 | 2  | 2 | 21 | 2006 |
| 16,3 | 29,9 | 0,7 | 5  | 2 | 25 | 2005 |
| 19,2 | 48,9 | 0,7 | 10 | 2 | 21 | 2013 |
| 13,5 | 17   | 0,7 | 3  | 2 | 22 | 2005 |

|      |      |     |   |   |    |      |
|------|------|-----|---|---|----|------|
| 13,5 | 17   | 0,7 | 3 | 2 | 25 | 2005 |
| 13,5 | 17   | 0,7 | 2 | 2 | 20 | 2013 |
| 17,4 | 36,4 | 0,7 | 5 | 2 | 21 | 2012 |
| 14,8 | 22,4 | 0,7 | 3 | 2 | 25 | 2003 |
| 14,8 | 22,4 | 0,7 | 4 | 2 | 25 | 2004 |
| 10,5 | 8    | 0,7 | 2 | 2 | 22 | 2004 |
| 12,5 | 13,5 | 0,7 | 2 | 2 | 20 | 2002 |
| 12,5 | 13,5 | 0,7 | 2 | 2 | 21 | 2012 |
| 11   | 9,2  | 0,7 | 3 | 2 | 23 | 2005 |
| 15,1 | 23,8 | 0,7 | 4 | 2 | 24 | 2006 |
| 15,1 | 23,8 | 0,7 | 5 | 2 | 24 | 2009 |
| 13,2 | 15,9 | 0,7 | 3 | 2 | 25 | 2007 |
| 13,2 | 15,9 | 0,7 | 3 | 2 | 20 | 2008 |
| 13,2 | 15,9 | 0,7 | 2 | 2 | 18 | 2014 |
| 16,7 | 32,2 | 0,7 | 4 | 2 | 21 | 2003 |
| 12,8 | 14,5 | 0,7 | 2 | 2 | 26 | 1999 |
| 12,8 | 14,5 | 0,7 | 2 | 2 | 27 | 1999 |
| 14,2 | 19,8 | 0,7 | 4 | 2 | 27 | 1999 |
| 14,2 | 19,8 | 0,7 | 3 | 2 | 17 | 2008 |

|      |      |     |   |   |    |      |
|------|------|-----|---|---|----|------|
| 14,2 | 19,8 | 0,7 | 4 | 2 | 22 | 2011 |
| 16,2 | 29,4 | 0,7 | 4 | 2 | 18 | 2002 |
| 16,2 | 29,4 | 0,7 | 9 | 2 | 23 | 2004 |
| 16,2 | 29,4 | 0,7 | 6 | 2 | 19 | 2011 |
| 16,2 | 29,4 | 0,7 | 6 | 2 | 19 | 2013 |
| 15,9 | 27,8 | 0,7 | 4 | 2 | 21 | 2008 |
| 18,2 | 41,7 | 0,7 | 8 | 2 | 18 | 2012 |
| 13,6 | 17,4 | 0,7 | 2 | 2 | 24 | 2002 |
| 13   | 15,2 | 0,7 | 3 | 2 | 18 | 1999 |
| 13   | 15,2 | 0,7 | 3 | 2 | 21 | 2000 |
| 13   | 15,2 | 0,7 | 2 | 2 | 21 | 2012 |
| 13   | 15,2 | 0,7 | 2 | 2 | 17 | 2014 |
| 15,2 | 24,3 | 0,7 | 4 | 2 | 24 | 2001 |
| 17,1 | 34,6 | 0,7 | 4 | 2 | 19 | 2014 |
| 17   | 34   | 0,7 | 5 | 2 | 21 | 2013 |
| 14,1 | 19,4 | 0,7 | 3 | 2 | 21 | 2012 |
| 14,1 | 19,4 | 0,7 | 3 | 2 | 17 | 2014 |
| 14,5 | 21,1 | 0,7 | 4 | 2 | 21 | 2012 |
| 13,7 | 17,8 | 0,7 | 2 | 2 | 22 | 2000 |

|      |      |     |   |   |    |      |
|------|------|-----|---|---|----|------|
| 13,7 | 17,8 | 0,7 | 3 | 2 | 23 | 2004 |
| 13,7 | 17,8 | 0,7 | 4 | 2 | 21 | 2012 |
| 19,2 | 49   | 0,7 | 6 | 2 | 21 | 2013 |
| 20,8 | 62,3 | 0,7 | 8 | 2 | 19 | 2013 |
| 12,4 | 13,2 | 0,7 | 3 | 2 | 25 | 2005 |
| 15,3 | 24,8 | 0,7 | 4 | 2 | 22 | 2000 |
| 15,3 | 24,8 | 0,7 | 4 | 2 | 18 | 2012 |
| 15,3 | 24,8 | 0,7 | 4 | 2 | 21 | 2015 |
| 15,7 | 26,8 | 0,7 | 3 | 2 | 19 | 2000 |
| 13,9 | 18,6 | 0,7 | 2 | 2 | 23 | 2002 |
| 15,6 | 26,3 | 0,7 | 6 | 2 | 26 | 2006 |
| 15,6 | 26,3 | 0,7 | 4 | 2 | 16 | 2015 |
| 11,3 | 10   | 0,7 | 2 | 2 | 22 | 2007 |
| 11,7 | 11,1 | 0,7 | 2 | 2 | 25 | 2004 |
| 11,7 | 11,1 | 0,7 | 2 | 2 | 21 | 2009 |
| 18,9 | 46,8 | 0,7 | 5 | 2 | 18 | 2012 |
| 20,6 | 60,6 | 0,7 | 5 | 2 | 18 | 2012 |
| 12,7 | 14,2 | 0,7 | 2 | 2 | 19 | 2002 |
| 12,7 | 14,2 | 0,7 | 2 | 2 | 20 | 2002 |

|      |      |     |   |   |    |      |
|------|------|-----|---|---|----|------|
| 12,7 | 14,2 | 0,7 | 2 | 2 | 19 | 2006 |
| 16   | 28,4 | 0,7 | 7 | 2 | 20 | 1999 |
| 16   | 28,4 | 0,7 | 5 | 2 | 21 | 2000 |
| 16   | 28,4 | 0,7 | 5 | 2 | 25 | 2004 |
| 16,4 | 30,6 | 0,7 | 6 | 2 | 20 | 2013 |
| 11,8 | 11,4 | 0,7 | 2 | 2 | 25 | 2007 |
| 16,2 | 29,5 | 0,7 | 6 | 2 | 23 | 2011 |
| 16,2 | 29,5 | 0,7 | 4 | 2 | 17 | 2012 |
| 12,2 | 12,6 | 0,7 | 3 | 2 | 22 | 2007 |
| 13,1 | 15,6 | 0,7 | 3 | 2 | 21 | 2005 |
| 13,1 | 15,6 | 0,7 | 3 | 2 | 21 | 2005 |
| 19   | 47,6 | 0,7 | 8 | 2 | 21 | 2015 |
| 16,9 | 33,5 | 0,7 | 7 | 2 | 17 | 2012 |
| 14,6 | 21,6 | 0,7 | 5 | 2 | 20 | 2013 |
| 14,8 | 22,5 | 0,7 | 5 | 2 | 25 | 1999 |
| 14,8 | 22,5 | 0,7 | 5 | 2 | 25 | 1999 |
| 14,8 | 22,5 | 0,7 | 3 | 2 | 23 | 2015 |
| 13,4 | 16,7 | 0,7 | 2 | 2 | 21 | 2000 |
| 13,4 | 16,7 | 0,7 | 3 | 2 | 23 | 2007 |

|      |      |     |    |   |    |      |
|------|------|-----|----|---|----|------|
| 13,4 | 16,7 | 0,7 | 3  | 2 | 22 | 2015 |
| 15,9 | 27,9 | 0,7 | 10 | 2 | 23 | 2007 |
| 15,1 | 23,9 | 0,7 | 3  | 2 | 26 | 2003 |
| 15,1 | 23,9 | 0,7 | 3  | 2 | 19 | 2012 |
| 14,3 | 20,3 | 0,7 | 5  | 2 | 25 | 1999 |
| 14,3 | 20,3 | 0,7 | 6  | 2 | 22 | 2003 |
| 12,1 | 12,3 | 0,7 | 3  | 2 | 25 | 2004 |
| 12,1 | 12,3 | 0,7 | 3  | 2 | 23 | 2005 |
| 12,1 | 12,3 | 0,7 | 2  | 2 | 21 | 2006 |
| 12,1 | 12,3 | 0,7 | 2  | 2 | 23 | 2006 |
| 12,1 | 12,3 | 0,7 | 2  | 2 | 25 | 2007 |
| 12   | 12   | 0,7 | 2  | 2 | 25 | 2005 |
| 12   | 12   | 0,7 | 2  | 2 | 19 | 2011 |
| 12   | 12   | 0,7 | 2  | 2 | 21 | 2014 |
| 15,8 | 27,4 | 0,7 | 5  | 2 | 24 | 2006 |
| 17,4 | 36,6 | 0,7 | 4  | 2 | 16 | 2015 |
| 15,2 | 24,4 | 0,7 | 4  | 2 | 23 | 2005 |
| 12,6 | 13,9 | 0,7 | 2  | 2 | 19 | 2000 |
| 14,2 | 19,9 | 0,7 | 2  | 2 | 23 | 2002 |

|      |      |     |   |   |    |      |
|------|------|-----|---|---|----|------|
| 14,2 | 19,9 | 0,7 | 3 | 2 | 26 | 2003 |
| 14,2 | 19,9 | 0,7 | 4 | 2 | 17 | 2008 |
| 14,2 | 19,9 | 0,7 | 4 | 2 | 23 | 2008 |
| 13,5 | 17,1 | 0,7 | 3 | 2 | 25 | 2007 |
| 15,7 | 26,9 | 0,7 | 4 | 2 | 23 | 1999 |
| 16,6 | 31,8 | 0,7 | 5 | 2 | 20 | 2001 |
| 16,6 | 31,8 | 0,7 | 5 | 2 | 24 | 2001 |
| 11,4 | 10,3 | 0,7 | 2 | 2 | 23 | 2004 |
| 15,3 | 24,9 | 0,7 | 3 | 2 | 21 | 2013 |
| 15,3 | 24,9 | 0,7 | 3 | 2 | 15 | 2015 |
| 14,5 | 21,2 | 0,7 | 4 | 2 | 19 | 2000 |
| 14,5 | 21,2 | 0,7 | 3 | 2 | 22 | 2015 |
| 15,4 | 25,4 | 0,7 | 5 | 2 | 26 | 1999 |
| 15,4 | 25,4 | 0,7 | 4 | 2 | 21 | 2013 |
| 15,5 | 25,9 | 0,7 | 6 | 2 | 19 | 2013 |
| 14,1 | 19,5 | 0,7 | 4 | 2 | 25 | 1999 |
| 14,1 | 19,5 | 0,7 | 3 | 2 | 25 | 2003 |
| 14,1 | 19,5 | 0,7 | 4 | 2 | 22 | 2011 |
| 14,1 | 19,5 | 0,7 | 2 | 2 | 20 | 2013 |

|      |      |     |    |   |    |      |
|------|------|-----|----|---|----|------|
| 13,2 | 16   | 0,7 | 4  | 2 | 21 | 2011 |
| 13,2 | 16   | 0,7 | 3  | 2 | 21 | 2011 |
| 17,2 | 35,4 | 0,7 | 8  | 2 | 22 | 2013 |
| 14,7 | 22,1 | 0,7 | 3  | 2 | 23 | 2002 |
| 16   | 28,5 | 0,7 | 5  | 2 | 21 | 2000 |
| 17,1 | 34,8 | 0,7 | 6  | 2 | 17 | 2012 |
| 14   | 19,1 | 0,7 | 2  | 2 | 22 | 2000 |
| 14   | 19,1 | 0,7 | 3  | 2 | 25 | 2003 |
| 14   | 19,1 | 0,7 | 3  | 2 | 25 | 2007 |
| 14   | 19,1 | 0,7 | 3  | 2 | 22 | 2015 |
| 17   | 34,2 | 0,7 | 5  | 2 | 21 | 2000 |
| 17   | 34,2 | 0,7 | 6  | 2 | 20 | 2003 |
| 13,7 | 17,9 | 0,7 | 2  | 2 | 24 | 2002 |
| 12,8 | 14,6 | 0,7 | 2  | 2 | 22 | 2013 |
| 20   | 55,7 | 0,7 | 10 | 2 | 19 | 2012 |
| 13,8 | 18,3 | 0,7 | 5  | 2 | 26 | 1999 |
| 13,8 | 18,3 | 0,7 | 3  | 2 | 25 | 2008 |
| 13   | 15,3 | 0,7 | 2  | 2 | 23 | 2009 |
| 15,9 | 28   | 0,7 | 5  | 2 | 19 | 2012 |

|      |      |     |    |   |    |      |
|------|------|-----|----|---|----|------|
| 14,4 | 20,8 | 0,7 | 4  | 2 | 21 | 2006 |
| 18,3 | 42,7 | 0,7 | 7  | 2 | 19 | 2014 |
| 16,5 | 31,3 | 0,7 | 8  | 2 | 23 | 2007 |
| 14,8 | 22,6 | 0,7 | 3  | 2 | 19 | 2012 |
| 17,3 | 36,1 | 0,7 | 6  | 2 | 19 | 2014 |
| 14,6 | 21,7 | 0,7 | 4  | 2 | 21 | 1999 |
| 14,6 | 21,7 | 0,7 | 3  | 2 | 24 | 2001 |
| 14,6 | 21,7 | 0,7 | 3  | 2 | 21 | 2014 |
| 16,6 | 31,9 | 0,7 | 6  | 2 | 20 | 2013 |
| 11,2 | 9,8  | 0,7 | 2  | 2 | 22 | 2004 |
| 11,2 | 9,8  | 0,7 | 2  | 2 | 25 | 2007 |
| 12,4 | 13,3 | 0,7 | 2  | 2 | 25 | 2007 |
| 12,4 | 13,3 | 0,7 | 2  | 2 | 25 | 2007 |
| 20,2 | 57,5 | 0,7 | 6  | 2 | 19 | 2012 |
| 15,2 | 24,5 | 0,7 | 4  | 2 | 20 | 2011 |
| 15,7 | 27   | 0,7 | 3  | 2 | 23 | 2003 |
| 19,2 | 49,4 | 0,7 | 10 | 2 | 22 | 2013 |
| 15,3 | 25   | 0,7 | 3  | 2 | 18 | 2002 |
| 15,3 | 25   | 0,7 | 4  | 2 | 18 | 2008 |

|      |      |     |   |   |    |      |
|------|------|-----|---|---|----|------|
| 15,3 | 25   | 0,7 | 3 | 2 | 19 | 2012 |
| 15,3 | 25   | 0,7 | 3 | 2 | 21 | 2015 |
| 16,8 | 33,1 | 0,7 | 6 | 2 | 20 | 2011 |
| 12,7 | 14,3 | 0,7 | 2 | 2 | 25 | 2005 |
| 17   | 34,3 | 0,7 | 4 | 2 | 20 | 2003 |
| 18,1 | 41,4 | 0,7 | 4 | 2 | 18 | 2012 |
| 15,4 | 25,5 | 0,7 | 4 | 2 | 20 | 2013 |
| 13,4 | 16,8 | 0,7 | 3 | 2 | 23 | 1999 |
| 13,4 | 16,8 | 0,7 | 2 | 2 | 25 | 2008 |
| 16   | 28,6 | 0,7 | 4 | 2 | 20 | 2003 |
| 11,6 | 10,9 | 0,7 | 1 | 2 | 26 | 2001 |
| 18,2 | 42,1 | 0,7 | 6 | 2 | 22 | 2013 |
| 13,1 | 15,7 | 0,7 | 3 | 2 | 25 | 2007 |
| 13,1 | 15,7 | 0,7 | 3 | 2 | 23 | 2008 |
| 14,2 | 20   | 0,7 | 4 | 2 | 19 | 2006 |
| 14,2 | 20   | 0,7 | 3 | 2 | 18 | 2012 |
| 14,2 | 20   | 0,7 | 4 | 2 | 15 | 2015 |
| 10,8 | 8,8  | 0,7 | 2 | 2 | 23 | 2004 |
| 12,3 | 13   | 0,7 | 2 | 2 | 21 | 2006 |

|      |      |     |   |   |    |      |
|------|------|-----|---|---|----|------|
| 12,3 | 13   | 0,7 | 2 | 2 | 26 | 2006 |
| 11   | 9,3  | 0,7 | 2 | 2 | 22 | 2004 |
| 12,9 | 15   | 0,7 | 3 | 2 | 21 | 2000 |
| 10,1 | 7,2  | 0,7 | 1 | 2 | 25 | 2005 |
| 17,6 | 38,1 | 0,7 | 8 | 2 | 23 | 2015 |
| 15,9 | 28,1 | 0,7 | 4 | 2 | 25 | 2004 |
| 13,5 | 17,2 | 0,7 | 3 | 2 | 22 | 1999 |
| 13,5 | 17,2 | 0,7 | 2 | 2 | 24 | 2002 |
| 15   | 23,6 | 0,7 | 5 | 2 | 25 | 1999 |
| 15   | 23,6 | 0,7 | 5 | 2 | 21 | 2000 |
| 11,7 | 11,2 | 0,7 | 2 | 2 | 25 | 2004 |
| 11,7 | 11,2 | 0,7 | 2 | 2 | 25 | 2008 |
| 12,2 | 12,7 | 0,7 | 3 | 2 | 21 | 2005 |
| 12,2 | 12,7 | 0,7 | 3 | 2 | 23 | 2005 |
| 12,2 | 12,7 | 0,7 | 2 | 2 | 23 | 2007 |
| 19,8 | 54,3 | 0,7 | 6 | 2 | 20 | 2013 |
| 16,3 | 30,3 | 0,7 | 6 | 2 | 20 | 2013 |
| 13,6 | 17,6 | 0,7 | 4 | 2 | 25 | 2008 |
| 10,5 | 8,1  | 0,7 | 2 | 2 | 25 | 2004 |

|      |      |     |    |   |    |      |
|------|------|-----|----|---|----|------|
| 14   | 19,2 | 0,7 | 4  | 2 | 21 | 2006 |
| 17,5 | 37,5 | 0,7 | 6  | 2 | 21 | 2013 |
| 15,8 | 27,6 | 0,7 | 5  | 2 | 19 | 2012 |
| 19   | 48   | 0,7 | 5  | 2 | 18 | 2012 |
| 12,6 | 14   | 0,7 | 2  | 2 | 20 | 2013 |
| 12,1 | 12,4 | 0,7 | 2  | 2 | 25 | 2007 |
| 17,1 | 35   | 0,7 | 5  | 2 | 19 | 2000 |
| 11,3 | 10,1 | 0,7 | 2  | 2 | 25 | 2004 |
| 11,3 | 10,1 | 0,7 | 2  | 2 | 25 | 2004 |
| 15,1 | 24,1 | 0,7 | 10 | 2 | 26 | 2001 |
| 13,7 | 18   | 0,7 | 3  | 2 | 26 | 2000 |
| 13,7 | 18   | 0,7 | 3  | 2 | 19 | 2012 |
| 13,7 | 18   | 0,7 | 3  | 2 | 22 | 2015 |
| 13,9 | 18,8 | 0,7 | 4  | 2 | 26 | 2009 |
| 13,8 | 18,4 | 0,7 | 4  | 2 | 21 | 2006 |
| 14,8 | 22,7 | 0,7 | 4  | 2 | 20 | 1999 |
| 15,7 | 27,1 | 0,7 | 4  | 2 | 21 | 2003 |
| 14,6 | 21,8 | 0,7 | 4  | 2 | 27 | 1999 |
| 14,6 | 21,8 | 0,7 | 3  | 2 | 23 | 2003 |

|      |      |     |   |   |    |      |
|------|------|-----|---|---|----|------|
| 15,6 | 26,6 | 0,7 | 4 | 2 | 27 | 1999 |
| 15,6 | 26,6 | 0,7 | 8 | 2 | 23 | 2015 |
| 15,3 | 25,1 | 0,7 | 7 | 2 | 23 | 1999 |
| 15,3 | 25,1 | 0,7 | 5 | 2 | 24 | 2002 |
| 16,2 | 29,8 | 0,7 | 4 | 2 | 24 | 2002 |
| 16,2 | 29,8 | 0,7 | 4 | 2 | 17 | 2012 |
| 15,4 | 25,6 | 0,7 | 6 | 2 | 19 | 2013 |
| 12,8 | 14,7 | 0,7 | 2 | 2 | 25 | 2005 |
| 13   | 15,4 | 0,7 | 2 | 2 | 22 | 2002 |
| 13   | 15,4 | 0,7 | 2 | 2 | 23 | 2002 |
| 13   | 15,4 | 0,7 | 5 | 2 | 23 | 2007 |
| 14,3 | 20,5 | 0,7 | 3 | 2 | 23 | 2010 |
| 14,3 | 20,5 | 0,7 | 3 | 2 | 23 | 2010 |
| 13,3 | 16,5 | 0,7 | 3 | 2 | 25 | 1999 |
| 13,3 | 16,5 | 0,7 | 2 | 2 | 27 | 1999 |
| 12,5 | 13,7 | 0,7 | 3 | 2 | 22 | 2005 |
| 15,9 | 28,2 | 0,7 | 5 | 2 | 17 | 2012 |
| 18,3 | 43   | 0,7 | 6 | 2 | 19 | 2013 |
| 14,5 | 21,4 | 0,7 | 3 | 2 | 26 | 2000 |

|      |      |     |    |   |    |      |
|------|------|-----|----|---|----|------|
| 16,3 | 30,4 | 0,7 | 10 | 2 | 19 | 2011 |
| 14,2 | 20,1 | 0,7 | 6  | 2 | 21 | 2008 |
| 14,2 | 20,1 | 0,7 | 3  | 2 | 20 | 2012 |
| 10,7 | 8,6  | 0,7 | 2  | 2 | 22 | 2004 |
| 14,7 | 22,3 | 0,7 | 2  | 2 | 26 | 2000 |
| 14,7 | 22,3 | 0,7 | 4  | 2 | 25 | 2005 |
| 15   | 23,7 | 0,7 | 5  | 2 | 23 | 1999 |
| 15,8 | 27,7 | 0,7 | 4  | 2 | 21 | 2013 |
| 16,8 | 33,3 | 0,7 | 10 | 2 | 21 | 2013 |
| 19,7 | 53,7 | 0,7 | 8  | 2 | 20 | 2013 |
| 14,1 | 19,7 | 0,7 | 5  | 2 | 24 | 2009 |
| 14,1 | 19,7 | 0,7 | 4  | 2 | 19 | 2011 |
| 16,4 | 31   | 0,7 | 4  | 2 | 18 | 2012 |
| 12,4 | 13,4 | 0,7 | 2  | 2 | 25 | 2007 |
| 13,1 | 15,8 | 0,7 | 3  | 2 | 21 | 2015 |
| 15,7 | 27,2 | 0,7 | 4  | 2 | 18 | 2000 |
| 15,7 | 27,2 | 0,7 | 4  | 2 | 22 | 2013 |
| 12,7 | 14,4 | 0,7 | 6  | 2 | 25 | 2008 |
| 17,3 | 36,4 | 0,7 | 5  | 2 | 19 | 2013 |

|      |      |     |   |   |    |      |
|------|------|-----|---|---|----|------|
| 21,4 | 68,9 | 0,7 | 9 | 2 | 20 | 2013 |
| 13,5 | 17,3 | 0,7 | 2 | 2 | 21 | 2000 |
| 14,8 | 22,8 | 0,7 | 4 | 2 | 24 | 2006 |
| 15,2 | 24,7 | 0,7 | 3 | 2 | 26 | 2003 |
| 15,2 | 24,7 | 0,7 | 7 | 2 | 19 | 2014 |
| 14   | 19,3 | 0,7 | 2 | 2 | 27 | 1999 |
| 14   | 19,3 | 0,7 | 3 | 2 | 21 | 2000 |
| 14   | 19,3 | 0,7 | 3 | 2 | 25 | 2007 |
| 12,9 | 15,1 | 0,7 | 2 | 2 | 25 | 2007 |
| 12,9 | 15,1 | 0,7 | 2 | 2 | 24 | 2009 |
| 17,5 | 37,7 | 0,7 | 4 | 2 | 19 | 2013 |
| 16,5 | 31,6 | 0,7 | 5 | 2 | 16 | 2015 |
| 15,5 | 26,2 | 0,7 | 3 | 2 | 18 | 2012 |
| 13,6 | 17,7 | 0,7 | 3 | 2 | 25 | 2002 |
| 14,6 | 21,9 | 0,7 | 3 | 2 | 21 | 2012 |
| 20   | 56,3 | 0,7 | 9 | 2 | 18 | 2015 |
| 13,7 | 18,1 | 0,7 | 3 | 2 | 24 | 2001 |
| 17,8 | 39,7 | 0,7 | 7 | 2 | 22 | 2001 |
| 13,2 | 16,2 | 0,7 | 2 | 2 | 21 | 2000 |

|      |      |     |   |   |    |      |
|------|------|-----|---|---|----|------|
| 13,2 | 16,2 | 0,7 | 3 | 2 | 23 | 2005 |
| 13,2 | 16,2 | 0,7 | 5 | 2 | 21 | 2006 |
| 17,9 | 40,4 | 0,7 | 5 | 2 | 19 | 2012 |
| 16,1 | 29,4 | 0,7 | 6 | 2 | 19 | 2014 |
| 12,6 | 14,1 | 0,7 | 2 | 2 | 19 | 2000 |
| 18,3 | 43,2 | 0,7 | 6 | 2 | 22 | 2013 |
| 20   | 56,4 | 0,7 | 7 | 2 | 18 | 2012 |
| 16,4 | 31,1 | 0,7 | 8 | 2 | 22 | 1999 |
| 16,4 | 31,1 | 0,7 | 6 | 2 | 17 | 2012 |
| 15   | 23,8 | 0,7 | 4 | 2 | 17 | 2012 |
| 14,5 | 21,5 | 0,7 | 5 | 2 | 25 | 2005 |
| 14,2 | 20,2 | 0,7 | 4 | 2 | 20 | 2011 |
| 13   | 15,5 | 0,7 | 3 | 2 | 25 | 2007 |
| 11,7 | 11,3 | 0,7 | 2 | 2 | 21 | 2009 |
| 16   | 28,9 | 0,7 | 7 | 2 | 19 | 2014 |
| 13,3 | 16,6 | 0,7 | 5 | 2 | 26 | 1999 |
| 13,3 | 16,6 | 0,7 | 3 | 2 | 25 | 2005 |
| 13,3 | 16,6 | 0,7 | 3 | 2 | 21 | 2014 |
| 13,3 | 16,6 | 0,7 | 3 | 2 | 23 | 2014 |

|      |      |     |   |   |    |      |
|------|------|-----|---|---|----|------|
| 12,1 | 12,5 | 0,7 | 2 | 2 | 19 | 2000 |
| 16,2 | 30   | 0,7 | 5 | 2 | 25 | 2002 |
| 16,2 | 30   | 0,7 | 5 | 2 | 21 | 2012 |
| 16,5 | 31,7 | 0,7 | 4 | 2 | 21 | 2003 |
| 16,5 | 31,7 | 0,7 | 6 | 2 | 22 | 2004 |
| 12,8 | 14,8 | 0,7 | 2 | 2 | 22 | 2002 |
| 12,8 | 14,8 | 0,7 | 3 | 2 | 23 | 2010 |
| 12,8 | 14,8 | 0,7 | 3 | 2 | 23 | 2010 |
| 12,8 | 14,8 | 0,7 | 2 | 2 | 22 | 2013 |
| 11,8 | 11,6 | 0,7 | 2 | 2 | 19 | 2011 |
| 12   | 12,2 | 0,7 | 3 | 2 | 21 | 2011 |
| 15,2 | 24,8 | 0,7 | 5 | 2 | 26 | 1999 |
| 15,5 | 26,3 | 0,7 | 4 | 2 | 22 | 2000 |
| 17   | 34,7 | 0,7 | 6 | 2 | 22 | 2013 |
| 14,1 | 19,8 | 0,7 | 5 | 2 | 19 | 2000 |
| 14,1 | 19,8 | 0,7 | 4 | 2 | 22 | 2004 |
| 15,3 | 25,3 | 0,7 | 6 | 2 | 25 | 1999 |
| 16,7 | 32,9 | 0,7 | 4 | 2 | 22 | 2002 |
| 14,8 | 22,9 | 0,7 | 4 | 2 | 20 | 2011 |

|      |      |     |   |   |    |      |
|------|------|-----|---|---|----|------|
| 14,8 | 22,9 | 0,7 | 4 | 2 | 21 | 2012 |
| 18   | 41,2 | 0,7 | 7 | 2 | 17 | 2012 |
| 13,4 | 17   | 0,7 | 4 | 2 | 23 | 1999 |
| 12,5 | 13,8 | 0,7 | 2 | 2 | 24 | 2006 |
| 12,5 | 13,8 | 0,7 | 2 | 2 | 25 | 2007 |
| 14,6 | 22   | 0,7 | 5 | 2 | 23 | 1999 |
| 14,6 | 22   | 0,7 | 4 | 2 | 23 | 1999 |
| 14,6 | 22   | 0,7 | 3 | 2 | 19 | 2012 |
| 14   | 19,4 | 0,7 | 6 | 2 | 20 | 2008 |
| 14   | 19,4 | 0,7 | 4 | 2 | 21 | 2008 |
| 13,5 | 17,4 | 0,7 | 5 | 2 | 26 | 1999 |
| 13,5 | 17,4 | 0,7 | 2 | 2 | 22 | 2000 |
| 13,1 | 15,9 | 0,7 | 2 | 2 | 24 | 2009 |
| 13,1 | 15,9 | 0,7 | 3 | 2 | 18 | 2015 |
| 16,4 | 31,2 | 0,7 | 4 | 2 | 26 | 2001 |
| 16,4 | 31,2 | 0,7 | 6 | 2 | 20 | 2011 |
| 14,9 | 23,4 | 0,7 | 4 | 2 | 25 | 1999 |
| 13,9 | 19   | 0,7 | 2 | 2 | 22 | 2000 |
| 13,9 | 19   | 0,7 | 2 | 2 | 19 | 2000 |

|      |      |     |   |   |    |      |
|------|------|-----|---|---|----|------|
| 17,2 | 36   | 0,7 | 5 | 2 | 19 | 2012 |
| 18,5 | 44,8 | 0,7 | 6 | 2 | 19 | 2013 |
| 13,6 | 17,8 | 0,7 | 2 | 2 | 27 | 1999 |
| 13,8 | 18,6 | 0,7 | 3 | 2 | 22 | 2000 |
| 13,8 | 18,6 | 0,7 | 3 | 2 | 20 | 2002 |
| 13,7 | 18,2 | 0,7 | 3 | 2 | 25 | 1999 |
| 13,7 | 18,2 | 0,7 | 3 | 2 | 25 | 2005 |
| 13,7 | 18,2 | 0,7 | 3 | 2 | 25 | 2005 |
| 12,7 | 14,5 | 0,7 | 2 | 2 | 24 | 2009 |
| 14,3 | 20,7 | 0,7 | 5 | 2 | 27 | 1999 |
| 14,3 | 20,7 | 0,7 | 5 | 2 | 23 | 2002 |
| 14,3 | 20,7 | 0,7 | 3 | 2 | 19 | 2008 |
| 16   | 29   | 0,7 | 6 | 2 | 19 | 2013 |
| 15   | 23,9 | 0,7 | 3 | 2 | 18 | 2012 |
| 14,7 | 22,5 | 0,7 | 4 | 2 | 23 | 2004 |
| 14,5 | 21,6 | 0,7 | 3 | 2 | 21 | 2000 |
| 15,6 | 26,9 | 0,7 | 3 | 2 | 19 | 2012 |
| 15,1 | 24,4 | 0,7 | 4 | 2 | 22 | 2013 |
| 13,2 | 16,3 | 0,7 | 2 | 2 | 18 | 2002 |

|      |      |     |   |   |    |      |
|------|------|-----|---|---|----|------|
| 18,8 | 47,1 | 0,7 | 5 | 2 | 18 | 2012 |
| 16,3 | 30,7 | 0,7 | 4 | 2 | 15 | 2015 |
| 15,5 | 26,4 | 0,7 | 6 | 2 | 22 | 2013 |
| 14,2 | 20,3 | 0,7 | 5 | 2 | 26 | 2000 |
| 15,2 | 24,9 | 0,7 | 5 | 2 | 22 | 2007 |
| 15,2 | 24,9 | 0,7 | 3 | 2 | 19 | 2011 |
| 17,5 | 38   | 0,7 | 6 | 2 | 20 | 2013 |
| 15,3 | 25,4 | 0,7 | 5 | 2 | 19 | 2012 |
| 12,3 | 13,2 | 0,7 | 2 | 2 | 25 | 2002 |
| 14,8 | 23   | 0,7 | 3 | 2 | 21 | 2012 |
| 16,4 | 31,3 | 0,7 | 7 | 2 | 20 | 2006 |
| 13,3 | 16,7 | 0,7 | 2 | 2 | 22 | 2002 |
| 13,3 | 16,7 | 0,7 | 3 | 2 | 21 | 2008 |
| 12,6 | 14,2 | 0,7 | 2 | 2 | 20 | 2000 |
| 18,2 | 42,8 | 0,7 | 6 | 2 | 20 | 2013 |
| 14,4 | 21,2 | 0,7 | 5 | 2 | 18 | 2000 |
| 13   | 15,6 | 0,7 | 2 | 2 | 20 | 2003 |
| 13   | 15,6 | 0,7 | 3 | 2 | 25 | 2005 |
| 16,5 | 31,9 | 0,7 | 6 | 2 | 24 | 2001 |

|      |      |     |   |   |    |      |
|------|------|-----|---|---|----|------|
| 16,2 | 30,2 | 0,7 | 5 | 2 | 22 | 2011 |
| 17   | 34,9 | 0,7 | 6 | 2 | 20 | 2013 |
| 12,2 | 12,9 | 0,7 | 3 | 2 | 23 | 2007 |
| 12,2 | 12,9 | 0,7 | 2 | 2 | 25 | 2007 |
| 16   | 29,1 | 0,7 | 6 | 2 | 20 | 2011 |
| 16   | 29,1 | 0,7 | 6 | 2 | 20 | 2013 |
| 15,7 | 27,5 | 0,7 | 5 | 2 | 25 | 2007 |
| 14   | 19,5 | 0,7 | 5 | 2 | 25 | 1999 |
| 14   | 19,5 | 0,7 | 3 | 2 | 22 | 2000 |
| 14   | 19,5 | 0,7 | 3 | 2 | 25 | 2002 |
| 14   | 19,5 | 0,7 | 4 | 2 | 19 | 2009 |
| 13,4 | 17,1 | 0,7 | 2 | 2 | 23 | 2002 |
| 13,4 | 17,1 | 0,7 | 3 | 2 | 25 | 2007 |
| 13,9 | 19,1 | 0,7 | 5 | 2 | 25 | 2007 |
| 15,6 | 27   | 0,7 | 6 | 2 | 25 | 1999 |
| 13,5 | 17,5 | 0,7 | 6 | 2 | 20 | 2011 |
| 14,3 | 20,8 | 0,7 | 6 | 2 | 18 | 2000 |
| 14,7 | 22,6 | 0,7 | 5 | 2 | 22 | 1999 |
| 15,9 | 28,6 | 0,7 | 5 | 2 | 19 | 2012 |

|      |      |     |   |   |    |      |
|------|------|-----|---|---|----|------|
| 15,1 | 24,5 | 0,7 | 5 | 2 | 25 | 2007 |
| 13,6 | 17,9 | 0,7 | 2 | 2 | 23 | 2002 |
| 15,5 | 26,5 | 0,7 | 5 | 2 | 19 | 2000 |
| 16,1 | 29,7 | 0,7 | 5 | 2 | 19 | 2012 |
| 12,5 | 13,9 | 0,7 | 3 | 2 | 21 | 2005 |
| 12,5 | 13,9 | 0,7 | 2 | 2 | 22 | 2011 |
| 13,7 | 18,3 | 0,7 | 3 | 2 | 20 | 2002 |
| 13,7 | 18,3 | 0,7 | 2 | 2 | 25 | 2008 |
| 11,2 | 10   | 0,7 | 3 | 2 | 23 | 2005 |
| 11,7 | 11,4 | 0,7 | 2 | 2 | 22 | 2011 |
| 14,5 | 21,7 | 0,7 | 3 | 2 | 23 | 2015 |
| 12   | 12,3 | 0,7 | 3 | 2 | 25 | 2005 |
| 12   | 12,3 | 0,7 | 3 | 2 | 25 | 2005 |
| 12   | 12,3 | 0,7 | 2 | 2 | 25 | 2007 |
| 12   | 12,3 | 0,7 | 2 | 2 | 21 | 2009 |
| 12   | 12,3 | 0,7 | 2 | 2 | 22 | 2011 |
| 19,9 | 56,1 | 0,7 | 8 | 2 | 17 | 2012 |
| 15,2 | 25   | 0,7 | 3 | 2 | 21 | 2000 |
| 15,4 | 26   | 0,7 | 4 | 2 | 22 | 2011 |

|      |      |     |   |   |    |      |
|------|------|-----|---|---|----|------|
| 15,3 | 25,5 | 0,7 | 5 | 2 | 18 | 2000 |
| 14,2 | 20,4 | 0,7 | 4 | 2 | 23 | 2002 |
| 14,2 | 20,4 | 0,7 | 4 | 2 | 23 | 2009 |
| 14,2 | 20,4 | 0,7 | 3 | 2 | 18 | 2012 |
| 14,2 | 20,4 | 0,7 | 4 | 2 | 22 | 2013 |
| 16,2 | 30,3 | 0,7 | 6 | 2 | 20 | 2013 |
| 12,7 | 14,6 | 0,7 | 2 | 2 | 25 | 1999 |
| 12,7 | 14,6 | 0,7 | 2 | 2 | 22 | 2002 |
| 16   | 29,2 | 0,7 | 6 | 2 | 21 | 2013 |
| 15,7 | 27,6 | 0,7 | 4 | 2 | 22 | 2001 |
| 18,2 | 43   | 0,7 | 6 | 2 | 19 | 2013 |
| 12,4 | 13,6 | 0,7 | 2 | 2 | 18 | 2002 |
| 12,4 | 13,6 | 0,7 | 2 | 2 | 25 | 2005 |
| 14,4 | 21,3 | 0,7 | 6 | 2 | 25 | 1999 |
| 14,6 | 22,2 | 0,7 | 3 | 2 | 22 | 2011 |
| 20,8 | 64,2 | 0,7 | 7 | 2 | 18 | 2012 |
| 14,1 | 20   | 0,7 | 4 | 2 | 23 | 2005 |
| 16,3 | 30,9 | 0,7 | 5 | 2 | 21 | 2012 |
| 16,3 | 30,9 | 0,7 | 5 | 2 | 22 | 2013 |

|      |      |     |   |   |    |      |
|------|------|-----|---|---|----|------|
| 20   | 57,1 | 0,7 | 6 | 2 | 22 | 2013 |
| 15   | 24,1 | 0,7 | 6 | 2 | 19 | 2000 |
| 13,3 | 16,8 | 0,7 | 5 | 2 | 25 | 2007 |
| 17,7 | 39,6 | 0,7 | 7 | 2 | 20 | 2013 |
| 14   | 19,6 | 0,7 | 2 | 2 | 24 | 2002 |
| 14   | 19,6 | 0,7 | 7 | 2 | 20 | 2012 |
| 15,1 | 24,6 | 0,7 | 5 | 2 | 20 | 1999 |
| 15,1 | 24,6 | 0,7 | 3 | 2 | 21 | 2014 |
| 15,1 | 24,6 | 0,7 | 3 | 2 | 23 | 2014 |
| 17,3 | 37   | 0,7 | 4 | 2 | 18 | 2012 |
| 13   | 15,7 | 0,7 | 3 | 2 | 25 | 2007 |
| 14,3 | 20,9 | 0,7 | 5 | 2 | 26 | 2000 |
| 14,3 | 20,9 | 0,7 | 3 | 2 | 24 | 2002 |
| 14,3 | 20,9 | 0,7 | 4 | 2 | 21 | 2005 |
| 14,3 | 20,9 | 0,7 | 3 | 2 | 19 | 2012 |
| 15,2 | 25,1 | 0,7 | 4 | 2 | 24 | 2006 |
| 15,3 | 25,6 | 0,7 | 4 | 2 | 19 | 1999 |
| 13,9 | 19,2 | 0,7 | 2 | 2 | 27 | 1999 |
| 18,2 | 43,1 | 0,7 | 7 | 2 | 18 | 2012 |

|      |      |     |   |   |    |      |
|------|------|-----|---|---|----|------|
| 15,8 | 28,2 | 0,7 | 4 | 2 | 18 | 2000 |
| 14,5 | 21,8 | 0,7 | 4 | 2 | 22 | 2011 |
| 16   | 29,3 | 0,7 | 4 | 2 | 25 | 2002 |
| 16   | 29,3 | 0,7 | 5 | 2 | 19 | 2012 |
| 13,5 | 17,6 | 0,7 | 2 | 2 | 24 | 2002 |
| 13,8 | 18,8 | 0,7 | 2 | 2 | 27 | 1999 |
| 13,8 | 18,8 | 0,7 | 4 | 2 | 26 | 2005 |
| 13,6 | 18   | 0,7 | 2 | 2 | 18 | 1999 |
| 13,7 | 18,4 | 0,7 | 3 | 2 | 27 | 1999 |
| 14,8 | 23,2 | 0,7 | 4 | 2 | 24 | 2002 |
| 12,2 | 13   | 0,7 | 3 | 2 | 25 | 2007 |
| 19,1 | 49,9 | 0,7 | 8 | 2 | 19 | 2013 |
| 13,1 | 16,1 | 0,7 | 3 | 2 | 20 | 2011 |
| 17,8 | 40,4 | 0,7 | 6 | 2 | 19 | 2000 |
| 14,6 | 22,3 | 0,7 | 4 | 2 | 23 | 2002 |
| 14,4 | 21,4 | 0,7 | 2 | 2 | 24 | 2002 |
| 11,5 | 10,9 | 0,7 | 2 | 2 | 25 | 2004 |
| 12,5 | 14   | 0,7 | 2 | 2 | 26 | 1999 |
| 12,5 | 14   | 0,7 | 2 | 2 | 25 | 2007 |

|      |      |     |    |   |    |      |
|------|------|-----|----|---|----|------|
| 12,5 | 14   | 0,7 | 3  | 2 | 23 | 2008 |
| 16,9 | 34,6 | 0,7 | 6  | 2 | 19 | 2011 |
| 12,1 | 12,7 | 0,7 | 2  | 2 | 25 | 2003 |
| 15,5 | 26,7 | 0,7 | 10 | 2 | 23 | 2002 |
| 15,5 | 26,7 | 0,7 | 4  | 2 | 19 | 2011 |
| 14,1 | 20,1 | 0,7 | 3  | 2 | 21 | 2000 |
| 14,1 | 20,1 | 0,7 | 3  | 2 | 24 | 2001 |
| 14,1 | 20,1 | 0,7 | 4  | 2 | 22 | 2002 |
| 14,1 | 20,1 | 0,7 | 3  | 2 | 24 | 2002 |
| 15   | 24,2 | 0,7 | 3  | 2 | 25 | 2002 |
| 16,6 | 32,8 | 0,7 | 4  | 2 | 18 | 2015 |
| 12,9 | 15,4 | 0,7 | 2  | 2 | 22 | 2002 |
| 15,8 | 28,3 | 0,7 | 3  | 2 | 21 | 2003 |
| 11,6 | 11,2 | 0,7 | 2  | 2 | 25 | 2004 |
| 15,3 | 25,7 | 0,7 | 5  | 2 | 19 | 2006 |
| 15,2 | 25,2 | 0,7 | 5  | 2 | 19 | 2012 |
| 15,2 | 25,2 | 0,7 | 4  | 2 | 20 | 2013 |
| 12   | 12,4 | 0,7 | 2  | 2 | 23 | 2007 |
| 12,7 | 14,7 | 0,7 | 3  | 2 | 25 | 2007 |

|      |      |     |   |   |    |      |
|------|------|-----|---|---|----|------|
| 14   | 19,7 | 0,7 | 4 | 2 | 19 | 2011 |
| 17,1 | 35,9 | 0,7 | 3 | 2 | 18 | 2012 |
| 11,7 | 11,5 | 0,7 | 2 | 2 | 26 | 2006 |
| 14,3 | 21   | 0,7 | 5 | 2 | 27 | 1999 |
| 14,3 | 21   | 0,7 | 3 | 2 | 26 | 2000 |
| 14,3 | 21   | 0,7 | 3 | 2 | 25 | 2002 |
| 14,3 | 21   | 0,7 | 4 | 2 | 23 | 2002 |
| 14,3 | 21   | 0,7 | 4 | 2 | 25 | 2004 |
| 13,3 | 16,9 | 0,7 | 3 | 2 | 25 | 2004 |
| 14,5 | 21,9 | 0,7 | 3 | 2 | 26 | 2000 |
| 14,5 | 21,9 | 0,7 | 3 | 2 | 24 | 2002 |
| 14,5 | 21,9 | 0,7 | 4 | 2 | 19 | 2011 |
| 18,1 | 42,6 | 0,7 | 7 | 2 | 18 | 2012 |
| 15,9 | 28,9 | 0,7 | 4 | 2 | 22 | 2011 |
| 15,9 | 28,9 | 0,7 | 5 | 2 | 21 | 2013 |
| 16,5 | 32,3 | 0,7 | 4 | 2 | 18 | 2012 |
| 15,6 | 27,3 | 0,7 | 3 | 2 | 24 | 2001 |
| 13,8 | 18,9 | 0,7 | 4 | 2 | 26 | 2009 |
| 16,6 | 32,9 | 0,7 | 6 | 2 | 19 | 2013 |

|      |      |     |   |   |    |      |
|------|------|-----|---|---|----|------|
| 13,5 | 17,7 | 0,7 | 3 | 2 | 18 | 2000 |
| 14,2 | 20,6 | 0,7 | 3 | 2 | 21 | 2012 |
| 13,7 | 18,5 | 0,7 | 2 | 2 | 27 | 1999 |
| 14,9 | 23,8 | 0,7 | 3 | 2 | 27 | 1999 |
| 14,9 | 23,8 | 0,7 | 4 | 2 | 26 | 2005 |
| 18,6 | 46,3 | 0,7 | 6 | 2 | 21 | 2013 |
| 17,7 | 39,9 | 0,7 | 6 | 2 | 20 | 2013 |
| 14,6 | 22,4 | 0,7 | 5 | 2 | 23 | 2007 |
| 12,6 | 14,4 | 0,7 | 2 | 2 | 22 | 2011 |
| 18,2 | 43,4 | 0,7 | 6 | 2 | 17 | 2012 |
| 17,1 | 36   | 0,7 | 5 | 2 | 21 | 2012 |
| 15   | 24,3 | 0,7 | 4 | 2 | 20 | 2006 |
| 15   | 24,3 | 0,7 | 4 | 2 | 24 | 2006 |
| 12,3 | 13,4 | 0,7 | 3 | 2 | 22 | 2005 |
| 12,3 | 13,4 | 0,7 | 2 | 2 | 26 | 2006 |
| 18   | 42   | 0,7 | 8 | 2 | 21 | 2013 |
| 16   | 29,5 | 0,7 | 9 | 2 | 19 | 2000 |
| 15,2 | 25,3 | 0,7 | 5 | 2 | 20 | 2011 |
| 16,3 | 31,2 | 0,7 | 5 | 2 | 19 | 2000 |

|      |      |     |   |   |    |      |
|------|------|-----|---|---|----|------|
| 14,1 | 20,2 | 0,7 | 2 | 2 | 18 | 2000 |
| 14,1 | 20,2 | 0,7 | 5 | 2 | 21 | 2000 |
| 14,1 | 20,2 | 0,7 | 5 | 2 | 26 | 2000 |
| 14,1 | 20,2 | 0,7 | 4 | 2 | 23 | 2006 |
| 14,1 | 20,2 | 0,7 | 4 | 2 | 21 | 2009 |
| 14,1 | 20,2 | 0,7 | 3 | 2 | 15 | 2015 |
| 16,4 | 31,8 | 0,7 | 6 | 2 | 24 | 2002 |
| 12,2 | 13,1 | 0,7 | 2 | 2 | 25 | 2003 |
| 12,2 | 13,1 | 0,7 | 2 | 2 | 25 | 2007 |
| 14   | 19,8 | 0,7 | 2 | 2 | 24 | 2002 |
| 14   | 19,8 | 0,7 | 3 | 2 | 23 | 2002 |
| 14   | 19,8 | 0,7 | 4 | 2 | 21 | 2011 |
| 14,5 | 22   | 0,7 | 3 | 2 | 23 | 2003 |
| 14,5 | 22   | 0,7 | 4 | 2 | 19 | 2012 |
| 14,5 | 22   | 0,7 | 3 | 2 | 21 | 2012 |
| 13,2 | 16,6 | 0,7 | 3 | 2 | 23 | 1999 |
| 13,2 | 16,6 | 0,7 | 3 | 2 | 23 | 2007 |
| 18,7 | 47,2 | 0,7 | 8 | 2 | 21 | 2013 |
| 14,8 | 23,4 | 0,7 | 4 | 2 | 20 | 1999 |

|      |      |     |   |   |    |      |
|------|------|-----|---|---|----|------|
| 14,8 | 23,4 | 0,7 | 5 | 2 | 21 | 2000 |
| 12,5 | 14,1 | 0,7 | 2 | 2 | 25 | 2008 |
| 12,9 | 15,5 | 0,7 | 2 | 2 | 19 | 2013 |
| 13,9 | 19,4 | 0,7 | 5 | 2 | 21 | 2000 |
| 13,9 | 19,4 | 0,7 | 2 | 2 | 26 | 2000 |
| 12,7 | 14,8 | 0,7 | 4 | 2 | 27 | 1999 |
| 12,7 | 14,8 | 0,7 | 2 | 2 | 24 | 2009 |
| 16   | 29,6 | 0,7 | 6 | 2 | 24 | 2006 |
| 16   | 29,6 | 0,7 | 4 | 2 | 19 | 2011 |
| 14,2 | 20,7 | 0,7 | 3 | 2 | 19 | 2012 |
| 15   | 24,4 | 0,7 | 4 | 2 | 23 | 2006 |
| 13,8 | 19   | 0,7 | 3 | 2 | 19 | 2012 |
| 16,9 | 34,9 | 0,7 | 9 | 2 | 22 | 2001 |
| 15,3 | 25,9 | 0,7 | 5 | 2 | 18 | 2000 |
| 15,3 | 25,9 | 0,7 | 4 | 2 | 18 | 2012 |
| 13,4 | 17,4 | 0,7 | 3 | 2 | 25 | 2008 |
| 11,5 | 11   | 0,7 | 2 | 2 | 23 | 2005 |
| 15,2 | 25,4 | 0,7 | 5 | 2 | 19 | 1999 |
| 19,3 | 52   | 0,7 | 7 | 2 | 18 | 2012 |

|      |      |     |   |   |    |      |
|------|------|-----|---|---|----|------|
| 18,7 | 47,3 | 0,7 | 5 | 2 | 18 | 2012 |
| 14,4 | 21,6 | 0,7 | 4 | 2 | 25 | 1999 |
| 12   | 12,5 | 0,7 | 2 | 2 | 22 | 2000 |
| 12   | 12,5 | 0,7 | 2 | 2 | 23 | 2010 |
| 12   | 12,5 | 0,7 | 2 | 2 | 23 | 2010 |
| 18   | 42,2 | 0,7 | 6 | 2 | 20 | 2013 |
| 13   | 15,9 | 0,7 | 3 | 2 | 25 | 2005 |
| 15,9 | 29,1 | 0,7 | 6 | 2 | 19 | 2006 |
| 11,6 | 11,3 | 0,7 | 2 | 2 | 20 | 2002 |
| 14,7 | 23   | 0,7 | 5 | 2 | 23 | 1999 |
| 11,7 | 11,6 | 0,7 | 2 | 2 | 20 | 2013 |
| 19   | 49,7 | 0,7 | 5 | 2 | 18 | 2012 |
| 17   | 35,6 | 0,7 | 6 | 2 | 21 | 2013 |
| 18,2 | 43,7 | 0,7 | 4 | 2 | 18 | 2012 |
| 14,8 | 23,5 | 0,7 | 5 | 2 | 27 | 1999 |
| 14,5 | 22,1 | 0,7 | 4 | 2 | 21 | 2006 |
| 14,5 | 22,1 | 0,7 | 4 | 2 | 20 | 2011 |
| 14,5 | 22,1 | 0,7 | 4 | 2 | 22 | 2011 |
| 13,1 | 16,3 | 0,7 | 3 | 2 | 23 | 2005 |

|      |      |     |   |   |    |      |
|------|------|-----|---|---|----|------|
| 16   | 29,7 | 0,7 | 4 | 2 | 22 | 2001 |
| 14   | 19,9 | 0,7 | 5 | 2 | 23 | 1999 |
| 14   | 19,9 | 0,7 | 3 | 2 | 20 | 2003 |
| 14   | 19,9 | 0,7 | 4 | 2 | 26 | 2009 |
| 14   | 19,9 | 0,7 | 4 | 2 | 21 | 2012 |
| 16,8 | 34,4 | 0,7 | 5 | 2 | 18 | 2012 |
| 15,4 | 26,5 | 0,7 | 4 | 2 | 19 | 2012 |
| 16,5 | 32,6 | 0,7 | 8 | 2 | 25 | 1999 |
| 16,5 | 32,6 | 0,7 | 5 | 2 | 19 | 2012 |
| 15,3 | 26   | 0,7 | 5 | 2 | 21 | 1999 |
| 15,3 | 26   | 0,7 | 4 | 2 | 26 | 2005 |
| 13,2 | 16,7 | 0,7 | 3 | 2 | 22 | 2002 |
| 15,7 | 28,1 | 0,7 | 4 | 2 | 20 | 2011 |
| 14,6 | 22,6 | 0,7 | 4 | 2 | 20 | 2011 |
| 17   | 35,7 | 0,7 | 5 | 2 | 20 | 2000 |
| 14,4 | 21,7 | 0,7 | 8 | 2 | 21 | 1999 |
| 14,4 | 21,7 | 0,7 | 8 | 2 | 26 | 1999 |
| 16,2 | 30,9 | 0,7 | 7 | 2 | 19 | 2012 |
| 13,3 | 17,1 | 0,7 | 5 | 2 | 26 | 1999 |

|      |      |     |   |   |    |      |
|------|------|-----|---|---|----|------|
| 13,3 | 17,1 | 0,7 | 4 | 2 | 26 | 1999 |
| 12,5 | 14,2 | 0,7 | 2 | 2 | 26 | 2001 |
| 16,9 | 35,1 | 0,7 | 7 | 2 | 19 | 2012 |
| 14,7 | 23,1 | 0,7 | 3 | 2 | 22 | 2004 |
| 13,7 | 18,7 | 0,7 | 4 | 2 | 21 | 1999 |
| 13,4 | 17,5 | 0,7 | 3 | 2 | 25 | 2004 |
| 13,4 | 17,5 | 0,7 | 4 | 2 | 25 | 2005 |
| 12,7 | 14,9 | 0,7 | 2 | 2 | 25 | 1999 |
| 12,7 | 14,9 | 0,7 | 6 | 2 | 25 | 2008 |
| 13,6 | 18,3 | 0,7 | 4 | 2 | 19 | 2006 |
| 13,6 | 18,3 | 0,7 | 3 | 2 | 23 | 2007 |
| 13,6 | 18,3 | 0,7 | 3 | 2 | 25 | 2007 |
| 16   | 29,8 | 0,7 | 4 | 2 | 20 | 2003 |
| 19,1 | 50,7 | 0,7 | 8 | 2 | 19 | 2013 |
| 11,3 | 10,5 | 0,7 | 2 | 2 | 20 | 2004 |
| 16,7 | 33,9 | 0,7 | 6 | 2 | 20 | 2013 |
| 17,3 | 37,7 | 0,7 | 7 | 2 | 19 | 2011 |
| 17,3 | 37,7 | 0,7 | 5 | 2 | 19 | 2012 |
| 14,5 | 22,2 | 0,7 | 2 | 2 | 23 | 2002 |

|      |      |     |     |   |    |      |
|------|------|-----|-----|---|----|------|
| 14,5 | 22,2 | 0,7 | 6   | 2 | 20 | 2011 |
| 13   | 16   | 0,7 | 3   | 2 | 25 | 2007 |
| 13   | 16   | 0,7 | 3   | 2 | 25 | 2007 |
| 13   | 16   | 0,7 | 3   | 2 | 21 | 2008 |
| 15,4 | 26,6 | 0,7 | 5   | 2 | 25 | 1999 |
| 15,4 | 26,6 | 0,7 | 6   | 2 | 17 | 2012 |
| 14,3 | 21,3 | 0,7 | 3   | 2 | 17 | 2012 |
| 16,1 | 30,4 | 0,7 | 10+ | 2 | 17 | 2014 |
| 18,1 | 43,2 | 0,7 | 5   | 2 | 21 | 2013 |
| 15,3 | 26,1 | 0,7 | 4   | 2 | 18 | 2012 |
| 18   | 42,5 | 0,7 | 6   | 2 | 15 | 2015 |
| 11   | 9,7  | 0,7 | 2   | 2 | 20 | 2009 |
| 17,9 | 41,8 | 0,7 | 10  | 2 | 18 | 2012 |
| 14   | 20   | 0,7 | 4   | 2 | 24 | 2009 |
| 15   | 24,6 | 0,7 | 4   | 2 | 20 | 2008 |
| 15,1 | 25,1 | 0,7 | 3   | 2 | 25 | 2002 |
| 12,4 | 13,9 | 0,7 | 3   | 2 | 25 | 2007 |
| 16,9 | 35,2 | 0,7 | 5   | 2 | 22 | 2013 |
| 14,6 | 22,7 | 0,7 | 5   | 2 | 25 | 2007 |

|      |      |     |    |   |    |      |
|------|------|-----|----|---|----|------|
| 13,1 | 16,4 | 0,7 | 2  | 2 | 26 | 2006 |
| 16,3 | 31,6 | 0,7 | 5  | 2 | 17 | 2008 |
| 18,2 | 44   | 0,7 | 6  | 2 | 21 | 2015 |
| 16   | 29,9 | 0,7 | 5  | 2 | 18 | 2012 |
| 16   | 29,9 | 0,7 | 8  | 2 | 20 | 2013 |
| 16,4 | 32,2 | 0,7 | 4  | 2 | 17 | 2008 |
| 14,4 | 21,8 | 0,7 | 5  | 2 | 19 | 2000 |
| 14,4 | 21,8 | 0,7 | 4  | 2 | 15 | 2015 |
| 16,5 | 32,8 | 0,7 | 5  | 2 | 25 | 1999 |
| 14,7 | 23,2 | 0,7 | 5  | 2 | 25 | 1999 |
| 18,6 | 47   | 0,7 | 10 | 2 | 20 | 2013 |
| 15,5 | 27,2 | 0,7 | 5  | 2 | 21 | 2000 |
| 13,2 | 16,8 | 0,7 | 3  | 2 | 25 | 2005 |
| 18   | 42,6 | 0,7 | 6  | 2 | 20 | 2013 |
| 13,8 | 19,2 | 0,7 | 2  | 2 | 26 | 2000 |
| 12,3 | 13,6 | 0,7 | 2  | 2 | 25 | 1999 |
| 12,3 | 13,6 | 0,7 | 2  | 2 | 21 | 2008 |
| 13,3 | 17,2 | 0,7 | 2  | 2 | 24 | 2009 |
| 13,7 | 18,8 | 0,7 | 4  | 2 | 24 | 2002 |

|      |      |     |   |   |    |      |
|------|------|-----|---|---|----|------|
| 17,5 | 39,2 | 0,7 | 5 | 2 | 21 | 2012 |
| 14,5 | 22,3 | 0,7 | 5 | 2 | 19 | 2000 |
| 13,6 | 18,4 | 0,7 | 3 | 2 | 15 | 2015 |
| 16,2 | 31,1 | 0,7 | 6 | 2 | 22 | 2013 |
| 15,3 | 26,2 | 0,7 | 6 | 2 | 20 | 2011 |
| 15,3 | 26,2 | 0,7 | 3 | 2 | 15 | 2015 |
| 13,5 | 18   | 0,7 | 3 | 2 | 23 | 1999 |
| 13,5 | 18   | 0,7 | 2 | 2 | 26 | 2001 |
| 13,5 | 18   | 0,7 | 3 | 2 | 25 | 2005 |
| 15,2 | 25,7 | 0,7 | 5 | 2 | 22 | 1999 |
| 15,1 | 25,2 | 0,7 | 5 | 2 | 19 | 2000 |
| 10,3 | 8    | 0,7 | 2 | 2 | 23 | 2004 |
| 16,7 | 34,1 | 0,7 | 5 | 2 | 23 | 2002 |
| 16,4 | 32,3 | 0,7 | 5 | 2 | 21 | 2014 |
| 12,7 | 15   | 0,7 | 3 | 2 | 25 | 2008 |
| 12,7 | 15   | 0,7 | 3 | 2 | 22 | 2011 |
| 20,5 | 63,1 | 0,7 | 7 | 2 | 21 | 2012 |
| 12,2 | 13,3 | 0,7 | 3 | 2 | 25 | 2005 |
| 14   | 20,1 | 0,7 | 5 | 2 | 18 | 1999 |

|      |      |     |   |   |    |      |
|------|------|-----|---|---|----|------|
| 14   | 20,1 | 0,7 | 4 | 2 | 25 | 1999 |
| 14   | 20,1 | 0,7 | 2 | 2 | 25 | 2002 |
| 14,6 | 22,8 | 0,7 | 5 | 2 | 22 | 1999 |
| 18,3 | 44,9 | 0,7 | 6 | 2 | 19 | 2013 |
| 13   | 16,1 | 0,7 | 2 | 2 | 20 | 2013 |
| 15,5 | 27,3 | 0,7 | 4 | 2 | 20 | 2010 |
| 15,5 | 27,3 | 0,7 | 4 | 2 | 20 | 2010 |
| 14,4 | 21,9 | 0,7 | 4 | 2 | 23 | 2011 |
| 18,1 | 43,5 | 0,7 | 7 | 2 | 18 | 2012 |
| 17,6 | 40   | 0,7 | 6 | 2 | 20 | 2013 |
| 16,2 | 31,2 | 0,7 | 6 | 2 | 21 | 2012 |
| 13,1 | 16,5 | 0,7 | 5 | 2 | 23 | 2006 |
| 17,1 | 36,7 | 0,7 | 6 | 2 | 19 | 2013 |
| 17,8 | 41,4 | 0,7 | 5 | 2 | 19 | 2012 |
| 10,5 | 8,5  | 0,7 | 2 | 2 | 23 | 2004 |
| 12,4 | 14   | 0,7 | 2 | 2 | 21 | 2000 |
| 16,7 | 34,2 | 0,7 | 5 | 2 | 24 | 2001 |
| 15,3 | 26,3 | 0,7 | 4 | 2 | 17 | 2012 |
| 13,8 | 19,3 | 0,7 | 3 | 2 | 19 | 2012 |

|      |      |     |     |   |    |      |
|------|------|-----|-----|---|----|------|
| 14,9 | 24,3 | 0,7 | 3   | 2 | 26 | 2003 |
| 11,3 | 10,6 | 0,7 | 3   | 2 | 25 | 2005 |
| 15,2 | 25,8 | 0,7 | 4   | 2 | 19 | 2012 |
| 14,5 | 22,4 | 0,7 | 5   | 2 | 27 | 1999 |
| 14,5 | 22,4 | 0,7 | 4   | 2 | 21 | 2011 |
| 15   | 24,8 | 0,7 | 5   | 2 | 22 | 2002 |
| 15   | 24,8 | 0,7 | 3   | 2 | 24 | 2002 |
| 12,6 | 14,7 | 0,7 | 2   | 2 | 25 | 1999 |
| 15,6 | 27,9 | 0,7 | 5   | 2 | 19 | 2012 |
| 12   | 12,7 | 0,7 | 2   | 2 | 19 | 2011 |
| 18,7 | 48,1 | 0,7 | 4   | 2 | 18 | 2012 |
| 13,5 | 18,1 | 0,7 | 3   | 2 | 23 | 2002 |
| 13,5 | 18,1 | 0,7 | 4   | 2 | 24 | 2009 |
| 11,4 | 10,9 | 0,7 | 2   | 2 | 25 | 2004 |
| 15,5 | 27,4 | 0,7 | 4   | 2 | 20 | 2013 |
| 14,6 | 22,9 | 0,7 | 6   | 2 | 20 | 2013 |
| 18,5 | 46,6 | 0,7 | 10+ | 2 | 17 | 2014 |
| 15,9 | 29,6 | 0,7 | 5   | 2 | 19 | 2000 |
| 11,5 | 11,2 | 0,7 | 2   | 2 | 25 | 2005 |

|      |      |     |    |   |    |      |
|------|------|-----|----|---|----|------|
| 11,8 | 12,1 | 0,7 | 2  | 2 | 25 | 2002 |
| 11,7 | 11,8 | 0,7 | 2  | 2 | 25 | 2007 |
| 14,4 | 22   | 0,7 | 3  | 2 | 23 | 2008 |
| 12,7 | 15,1 | 0,7 | 2  | 2 | 21 | 2011 |
| 15,2 | 25,9 | 0,7 | 6  | 2 | 21 | 1999 |
| 15,2 | 25,9 | 0,7 | 5  | 2 | 23 | 1999 |
| 15,2 | 25,9 | 0,7 | 4  | 2 | 25 | 2002 |
| 19   | 50,6 | 0,7 | 10 | 2 | 17 | 2012 |
| 15,8 | 29,1 | 0,7 | 5  | 2 | 19 | 2012 |
| 17,3 | 38,2 | 0,7 | 7  | 2 | 18 | 2012 |
| 12,2 | 13,4 | 0,7 | 2  | 2 | 19 | 2006 |
| 12,2 | 13,4 | 0,7 | 3  | 2 | 25 | 2008 |
| 17,1 | 36,9 | 0,7 | 5  | 2 | 17 | 2012 |
| 13,1 | 16,6 | 0,7 | 3  | 2 | 24 | 2002 |
| 13,1 | 16,6 | 0,7 | 2  | 2 | 24 | 2002 |
| 15,5 | 27,5 | 0,7 | 5  | 2 | 22 | 1999 |
| 15,5 | 27,5 | 0,7 | 5  | 2 | 25 | 1999 |
| 16,3 | 32   | 0,7 | 6  | 2 | 19 | 2011 |
| 15,7 | 28,6 | 0,7 | 4  | 2 | 21 | 2012 |

|      |      |     |   |   |    |      |
|------|------|-----|---|---|----|------|
| 14,6 | 23   | 0,7 | 5 | 2 | 25 | 1999 |
| 16,5 | 33,2 | 0,7 | 6 | 2 | 19 | 2011 |
| 13,2 | 17   | 0,7 | 2 | 2 | 27 | 1999 |
| 15,4 | 27   | 0,7 | 5 | 2 | 26 | 2000 |
| 12,1 | 13,1 | 0,7 | 2 | 2 | 25 | 2007 |
| 13,4 | 17,8 | 0,7 | 5 | 2 | 26 | 2006 |
| 14   | 20,3 | 0,7 | 5 | 2 | 18 | 1999 |
| 14   | 20,3 | 0,7 | 2 | 2 | 27 | 1999 |
| 14   | 20,3 | 0,7 | 3 | 2 | 19 | 2012 |
| 15,3 | 26,5 | 0,7 | 4 | 2 | 25 | 2008 |
| 14,4 | 22,1 | 0,7 | 5 | 2 | 21 | 1999 |
| 14,4 | 22,1 | 0,7 | 4 | 2 | 22 | 2000 |
| 15,6 | 28,1 | 0,7 | 6 | 2 | 21 | 2001 |
| 15,8 | 29,2 | 0,7 | 5 | 2 | 23 | 2011 |
| 15,8 | 29,2 | 0,7 | 5 | 2 | 19 | 2011 |
| 15,2 | 26   | 0,7 | 4 | 2 | 25 | 1999 |
| 15,2 | 26   | 0,7 | 7 | 2 | 17 | 2012 |
| 15,1 | 25,5 | 0,7 | 4 | 2 | 23 | 2006 |
| 15,1 | 25,5 | 0,7 | 4 | 2 | 20 | 2012 |

|      |      |     |   |   |    |      |
|------|------|-----|---|---|----|------|
| 12,9 | 15,9 | 0,7 | 2 | 2 | 22 | 2013 |
| 18,5 | 46,9 | 0,7 | 8 | 2 | 21 | 2013 |
| 15   | 25   | 0,7 | 6 | 2 | 26 | 2001 |
| 16,2 | 31,5 | 0,7 | 7 | 2 | 21 | 2013 |
| 14,5 | 22,6 | 0,7 | 4 | 2 | 27 | 1999 |
| 15,9 | 29,8 | 0,7 | 5 | 2 | 23 | 2003 |
| 12,3 | 13,8 | 0,7 | 2 | 2 | 21 | 2000 |
| 12,3 | 13,8 | 0,7 | 3 | 2 | 26 | 2005 |
| 15,7 | 28,7 | 0,7 | 4 | 2 | 24 | 2002 |
| 11,9 | 12,5 | 0,7 | 3 | 2 | 19 | 2006 |
| 13   | 16,3 | 0,7 | 2 | 2 | 26 | 2000 |
| 13   | 16,3 | 0,7 | 2 | 2 | 26 | 2009 |
| 14,1 | 20,8 | 0,7 | 5 | 2 | 25 | 2007 |
| 14,3 | 21,7 | 0,7 | 2 | 2 | 26 | 2000 |
| 12,5 | 14,5 | 0,7 | 2 | 2 | 25 | 2007 |
| 15,3 | 26,6 | 0,7 | 7 | 2 | 22 | 2007 |
| 17,9 | 42,6 | 0,7 | 8 | 2 | 20 | 2013 |
| 15,6 | 28,2 | 0,7 | 5 | 2 | 22 | 2013 |
| 13,1 | 16,7 | 0,7 | 2 | 2 | 23 | 2005 |

|      |      |     |   |   |    |      |
|------|------|-----|---|---|----|------|
| 14,7 | 23,6 | 0,7 | 7 | 2 | 22 | 1999 |
| 15,2 | 26,1 | 0,7 | 4 | 2 | 23 | 2002 |
| 14,4 | 22,2 | 0,7 | 2 | 2 | 21 | 2000 |
| 16,3 | 32,2 | 0,7 | 6 | 2 | 22 | 2011 |
| 16,3 | 32,2 | 0,7 | 6 | 2 | 21 | 2012 |
| 16,5 | 33,4 | 0,7 | 4 | 2 | 21 | 2012 |
| 15,1 | 25,6 | 0,7 | 5 | 2 | 25 | 1999 |
| 15   | 25,1 | 0,7 | 4 | 2 | 26 | 2006 |
| 15   | 25,1 | 0,7 | 5 | 2 | 20 | 2012 |
| 13,3 | 17,5 | 0,7 | 2 | 2 | 26 | 1999 |
| 15,5 | 27,7 | 0,7 | 6 | 2 | 19 | 2011 |
| 15,4 | 27,2 | 0,7 | 4 | 2 | 19 | 2006 |
| 12,4 | 14,2 | 0,7 | 3 | 2 | 22 | 2005 |
| 12,1 | 13,2 | 0,7 | 2 | 2 | 22 | 2011 |
| 12,9 | 16   | 0,7 | 2 | 2 | 25 | 2002 |
| 15,3 | 26,7 | 0,7 | 4 | 2 | 17 | 2012 |
| 14,3 | 21,8 | 0,7 | 3 | 2 | 25 | 2002 |
| 13,8 | 19,6 | 0,7 | 2 | 2 | 25 | 2002 |
| 14,7 | 23,7 | 0,7 | 5 | 2 | 25 | 1999 |

|      |      |     |   |   |    |      |
|------|------|-----|---|---|----|------|
| 15,1 | 25,7 | 0,7 | 5 | 2 | 27 | 1999 |
| 15,1 | 25,7 | 0,7 | 4 | 2 | 25 | 2007 |
| 19   | 51,2 | 0,7 | 5 | 2 | 20 | 2013 |
| 13   | 16,4 | 0,7 | 4 | 2 | 26 | 2009 |
| 14,8 | 24,2 | 0,7 | 5 | 2 | 19 | 2012 |
| 15   | 25,2 | 0,7 | 8 | 2 | 26 | 1999 |
| 13,7 | 19,2 | 0,7 | 3 | 2 | 21 | 2000 |
| 13,7 | 19,2 | 0,7 | 3 | 2 | 22 | 2002 |
| 13,7 | 19,2 | 0,7 | 3 | 2 | 21 | 2012 |
| 15,7 | 28,9 | 0,7 | 6 | 2 | 20 | 2011 |
| 12,7 | 15,3 | 0,7 | 2 | 2 | 21 | 2000 |
| 14   | 20,5 | 0,7 | 5 | 2 | 25 | 1999 |
| 14   | 20,5 | 0,7 | 3 | 2 | 23 | 2007 |
| 14   | 20,5 | 0,7 | 4 | 2 | 25 | 2007 |
| 13,1 | 16,8 | 0,7 | 2 | 2 | 23 | 2002 |
| 13,1 | 16,8 | 0,7 | 3 | 2 | 23 | 2005 |
| 15,4 | 27,3 | 0,7 | 4 | 2 | 20 | 2011 |
| 12,5 | 14,6 | 0,7 | 2 | 2 | 22 | 2009 |
| 13,3 | 17,6 | 0,7 | 2 | 2 | 25 | 2003 |

|      |      |     |   |   |    |      |
|------|------|-----|---|---|----|------|
| 13,4 | 18   | 0,7 | 3 | 2 | 25 | 2005 |
| 13,4 | 18   | 0,7 | 4 | 2 | 25 | 2008 |
| 13,4 | 18   | 0,7 | 4 | 2 | 22 | 2011 |
| 15,3 | 26,8 | 0,7 | 4 | 2 | 17 | 2012 |
| 13,9 | 20,1 | 0,7 | 2 | 2 | 25 | 2002 |
| 16,8 | 35,5 | 0,7 | 5 | 2 | 18 | 2000 |
| 14,3 | 21,9 | 0,7 | 5 | 2 | 26 | 1999 |
| 14,3 | 21,9 | 0,7 | 2 | 2 | 21 | 2000 |
| 14,1 | 21   | 0,7 | 3 | 2 | 25 | 2002 |
| 14,7 | 23,8 | 0,7 | 3 | 2 | 22 | 2011 |
| 16,7 | 34,9 | 0,7 | 6 | 2 | 20 | 2013 |
| 15,1 | 25,8 | 0,7 | 4 | 2 | 25 | 1999 |
| 20,2 | 61,8 | 0,7 | 5 | 2 | 18 | 2012 |
| 10   | 7,5  | 0,8 | 2 | 2 | 23 | 2004 |
| 16,1 | 31,3 | 0,8 | 9 | 2 | 24 | 2009 |
| 12,4 | 14,3 | 0,8 | 2 | 2 | 25 | 2008 |
| 15,4 | 27,4 | 0,8 | 6 | 2 | 19 | 2011 |
| 16,3 | 32,5 | 0,8 | 6 | 2 | 23 | 2011 |
| 14   | 20,6 | 0,8 | 2 | 2 | 26 | 2000 |

|      |      |     |    |   |    |      |
|------|------|-----|----|---|----|------|
| 14,2 | 21,5 | 0,8 | 4  | 2 | 23 | 1999 |
| 13   | 16,5 | 0,8 | 2  | 2 | 22 | 2000 |
| 13   | 16,5 | 0,8 | 2  | 2 | 25 | 2005 |
| 13   | 16,5 | 0,8 | 3  | 2 | 26 | 2005 |
| 17   | 36,9 | 0,8 | 10 | 2 | 19 | 2012 |
| 15,9 | 30,2 | 0,8 | 7  | 2 | 25 | 2007 |
| 13,6 | 18,9 | 0,8 | 2  | 2 | 21 | 2000 |
| 15,2 | 26,4 | 0,8 | 5  | 2 | 20 | 1999 |
| 18,5 | 47,6 | 0,8 | 6  | 2 | 21 | 2013 |
| 13,2 | 17,3 | 0,8 | 2  | 2 | 26 | 1999 |
| 13,2 | 17,3 | 0,8 | 3  | 2 | 26 | 1999 |
| 13,4 | 18,1 | 0,8 | 2  | 2 | 21 | 2000 |
| 13,4 | 18,1 | 0,8 | 2  | 2 | 26 | 2000 |
| 12   | 13   | 0,8 | 2  | 2 | 25 | 2007 |
| 19,8 | 58,4 | 0,8 | 5  | 2 | 18 | 2012 |
| 13,3 | 17,7 | 0,8 | 2  | 2 | 22 | 2011 |
| 14,7 | 23,9 | 0,8 | 4  | 2 | 26 | 1999 |
| 14,7 | 23,9 | 0,8 | 6  | 2 | 27 | 1999 |
| 16,4 | 33,2 | 0,8 | 4  | 2 | 24 | 2002 |

|      |      |     |    |   |    |      |
|------|------|-----|----|---|----|------|
| 18   | 43,9 | 0,8 | 10 | 2 | 19 | 2012 |
| 15,4 | 27,5 | 0,8 | 5  | 2 | 26 | 2000 |
| 11,1 | 10,3 | 0,8 | 2  | 2 | 25 | 2007 |
| 13,8 | 19,8 | 0,8 | 3  | 2 | 24 | 2002 |
| 17,8 | 42,5 | 0,8 | 9  | 2 | 19 | 2013 |
| 11,9 | 12,7 | 0,8 | 3  | 2 | 26 | 2005 |
| 15,3 | 27   | 0,8 | 5  | 2 | 21 | 2012 |
| 17,6 | 41,1 | 0,8 | 7  | 2 | 18 | 2012 |
| 14,2 | 21,6 | 0,8 | 9  | 2 | 25 | 1999 |
| 14,2 | 21,6 | 0,8 | 6  | 2 | 25 | 1999 |
| 14,2 | 21,6 | 0,8 | 3  | 2 | 25 | 2002 |
| 14,5 | 23   | 0,8 | 4  | 2 | 26 | 2009 |
| 19,2 | 53,4 | 0,8 | 7  | 2 | 17 | 2012 |
| 12,2 | 13,7 | 0,8 | 2  | 2 | 22 | 2002 |
| 16,5 | 33,9 | 0,8 | 6  | 2 | 21 | 2013 |
| 12,6 | 15,1 | 0,8 | 3  | 2 | 24 | 2002 |
| 17,9 | 43,3 | 0,8 | 7  | 2 | 17 | 2012 |
| 16,2 | 32,1 | 0,8 | 4  | 2 | 21 | 2012 |
| 12,4 | 14,4 | 0,8 | 2  | 2 | 19 | 2009 |

|      |      |     |   |   |    |      |
|------|------|-----|---|---|----|------|
| 13   | 16,6 | 0,8 | 4 | 2 | 22 | 2002 |
| 17,5 | 40,5 | 0,8 | 5 | 2 | 20 | 2013 |
| 13,9 | 20,3 | 0,8 | 5 | 2 | 18 | 2012 |
| 11,4 | 11,2 | 0,8 | 2 | 2 | 22 | 2002 |
| 13,1 | 17   | 0,8 | 2 | 2 | 25 | 2002 |
| 13,1 | 17   | 0,8 | 2 | 2 | 25 | 2008 |
| 14,1 | 21,2 | 0,8 | 5 | 2 | 23 | 1999 |
| 13,2 | 17,4 | 0,8 | 4 | 2 | 21 | 2006 |
| 15,3 | 27,1 | 0,8 | 4 | 2 | 22 | 2002 |
| 12,7 | 15,5 | 0,8 | 2 | 2 | 22 | 2002 |
| 16   | 31   | 0,8 | 5 | 2 | 20 | 2000 |
| 14,4 | 22,6 | 0,8 | 4 | 2 | 19 | 2000 |
| 15,7 | 29,3 | 0,8 | 4 | 2 | 19 | 2011 |
| 15,5 | 28,2 | 0,8 | 5 | 2 | 21 | 2000 |
| 15,5 | 28,2 | 0,8 | 5 | 2 | 21 | 2012 |
| 16,2 | 32,2 | 0,8 | 6 | 2 | 19 | 2012 |
| 14   | 20,8 | 0,8 | 4 | 2 | 26 | 2006 |
| 15,1 | 26,1 | 0,8 | 4 | 2 | 21 | 1999 |
| 14,6 | 23,6 | 0,8 | 3 | 2 | 23 | 2003 |

|      |      |     |    |   |    |      |
|------|------|-----|----|---|----|------|
| 14,6 | 23,6 | 0,8 | 6  | 2 | 25 | 2005 |
| 13,7 | 19,5 | 0,8 | 3  | 2 | 22 | 2000 |
| 15   | 25,6 | 0,8 | 4  | 2 | 18 | 2002 |
| 15,6 | 28,8 | 0,8 | 4  | 2 | 20 | 2011 |
| 14,7 | 24,1 | 0,8 | 3  | 2 | 25 | 2002 |
| 20   | 60,7 | 0,8 | 10 | 2 | 18 | 2012 |
| 14,9 | 25,1 | 0,8 | 4  | 2 | 27 | 1999 |
| 14,9 | 25,1 | 0,8 | 4  | 2 | 21 | 2000 |
| 20,9 | 69,3 | 0,8 | 10 | 2 | 22 | 2013 |
| 16   | 31,1 | 0,8 | 5  | 2 | 22 | 2002 |
| 13,6 | 19,1 | 0,8 | 4  | 2 | 19 | 2006 |
| 17,5 | 40,7 | 0,8 | 6  | 2 | 19 | 2013 |
| 14,1 | 21,3 | 0,8 | 3  | 2 | 25 | 2002 |
| 14,1 | 21,3 | 0,8 | 3  | 2 | 25 | 2004 |
| 14,1 | 21,3 | 0,8 | 3  | 2 | 19 | 2011 |
| 12,2 | 13,8 | 0,8 | 3  | 2 | 25 | 2005 |
| 13,5 | 18,7 | 0,8 | 2  | 2 | 21 | 2000 |
| 13,2 | 17,5 | 0,8 | 4  | 2 | 25 | 1999 |
| 20,4 | 64,6 | 0,8 | 10 | 2 | 21 | 2013 |

|      |      |     |   |   |    |      |
|------|------|-----|---|---|----|------|
| 15,6 | 28,9 | 0,8 | 4 | 2 | 23 | 2002 |
| 17   | 37,4 | 0,8 | 7 | 2 | 19 | 2012 |
| 18   | 44,4 | 0,8 | 6 | 2 | 19 | 2013 |
| 14,2 | 21,8 | 0,8 | 4 | 2 | 22 | 2004 |
| 14,2 | 21,8 | 0,8 | 4 | 2 | 22 | 2011 |
| 12,7 | 15,6 | 0,8 | 2 | 2 | 27 | 1999 |
| 14   | 20,9 | 0,8 | 3 | 2 | 19 | 2011 |
| 11,7 | 12,2 | 0,8 | 3 | 2 | 20 | 2004 |
| 23,4 | 97,6 | 0,8 | 9 | 2 | 18 | 2012 |
| 14,7 | 24,2 | 0,8 | 3 | 2 | 21 | 2000 |
| 17,9 | 43,7 | 0,8 | 6 | 2 | 18 | 2012 |
| 16,1 | 31,8 | 0,8 | 6 | 2 | 25 | 1999 |
| 13,7 | 19,6 | 0,8 | 2 | 2 | 22 | 2002 |
| 18,1 | 45,2 | 0,8 | 6 | 2 | 20 | 2013 |
| 18,4 | 47,5 | 0,8 | 7 | 2 | 18 | 2012 |
| 14,3 | 22,3 | 0,8 | 6 | 2 | 26 | 1999 |
| 11,4 | 11,3 | 0,8 | 2 | 2 | 20 | 2009 |
| 12,3 | 14,2 | 0,8 | 2 | 2 | 22 | 2002 |
| 15,8 | 30,1 | 0,8 | 5 | 2 | 19 | 2012 |

|      |      |     |   |   |    |      |
|------|------|-----|---|---|----|------|
| 14,1 | 21,4 | 0,8 | 3 | 2 | 17 | 2008 |
| 16,5 | 34,3 | 0,8 | 5 | 2 | 20 | 2000 |
| 16   | 31,3 | 0,8 | 7 | 2 | 19 | 2012 |
| 15   | 25,8 | 0,8 | 6 | 2 | 22 | 2011 |
| 16,9 | 36,9 | 0,8 | 5 | 2 | 21 | 2013 |
| 13   | 16,8 | 0,8 | 3 | 2 | 21 | 2011 |
| 13,4 | 18,4 | 0,8 | 2 | 2 | 25 | 2002 |
| 13,8 | 20,1 | 0,8 | 2 | 2 | 27 | 1999 |
| 14,9 | 25,3 | 0,8 | 6 | 2 | 27 | 1999 |
| 13,1 | 17,2 | 0,8 | 3 | 2 | 25 | 2007 |
| 13,3 | 18   | 0,8 | 3 | 2 | 21 | 2000 |
| 13,3 | 18   | 0,8 | 3 | 2 | 22 | 2002 |
| 13,3 | 18   | 0,8 | 2 | 2 | 25 | 2002 |
| 17,1 | 38,3 | 0,8 | 5 | 2 | 19 | 2000 |
| 13,7 | 19,7 | 0,8 | 3 | 2 | 22 | 2002 |
| 15,9 | 30,8 | 0,8 | 4 | 2 | 19 | 2011 |
| 15,9 | 30,8 | 0,8 | 5 | 2 | 19 | 2012 |
| 16,4 | 33,8 | 0,8 | 4 | 2 | 20 | 2003 |
| 18,3 | 47   | 0,8 | 7 | 2 | 19 | 2012 |

|      |      |     |    |   |    |      |
|------|------|-----|----|---|----|------|
| 13,6 | 19,3 | 0,8 | 2  | 2 | 27 | 1999 |
| 13,6 | 19,3 | 0,8 | 4  | 2 | 22 | 2002 |
| 16,6 | 35,1 | 0,8 | 7  | 2 | 19 | 2012 |
| 18,5 | 48,6 | 0,8 | 8  | 2 | 20 | 2013 |
| 12,1 | 13,6 | 0,8 | 3  | 2 | 23 | 2005 |
| 15,3 | 27,5 | 0,8 | 5  | 2 | 25 | 1999 |
| 15,5 | 28,6 | 0,8 | 5  | 2 | 25 | 1999 |
| 14,2 | 22   | 0,8 | 3  | 2 | 27 | 1999 |
| 11,2 | 10,8 | 0,8 | 2  | 2 | 25 | 2007 |
| 20,2 | 63,4 | 0,8 | 10 | 2 | 18 | 2012 |
| 14,3 | 22,5 | 0,8 | 4  | 2 | 26 | 1999 |
| 14,3 | 22,5 | 0,8 | 4  | 2 | 23 | 2007 |
| 14,4 | 23   | 0,8 | 4  | 2 | 19 | 2012 |
| 14,1 | 21,6 | 0,8 | 5  | 2 | 25 | 1999 |
| 15,3 | 27,6 | 0,8 | 4  | 2 | 22 | 2013 |
| 16,4 | 34   | 0,8 | 6  | 2 | 22 | 2013 |
| 14,5 | 23,5 | 0,8 | 5  | 2 | 26 | 1999 |
| 20,1 | 62,6 | 0,8 | 7  | 2 | 15 | 2015 |
| 14,7 | 24,5 | 0,8 | 5  | 2 | 19 | 2012 |

|      |      |     |    |   |    |      |
|------|------|-----|----|---|----|------|
| 12,7 | 15,8 | 0,8 | 2  | 2 | 24 | 2002 |
| 17,9 | 44,3 | 0,8 | 6  | 2 | 21 | 2013 |
| 17,4 | 40,7 | 0,8 | 7  | 2 | 18 | 2002 |
| 17,4 | 40,7 | 0,8 | 10 | 2 | 26 | 2006 |
| 15,1 | 26,6 | 0,8 | 5  | 2 | 20 | 2007 |
| 14   | 21,2 | 0,8 | 3  | 2 | 22 | 2011 |
| 16,9 | 37,3 | 0,8 | 7  | 2 | 19 | 2012 |
| 12,9 | 16,6 | 0,8 | 2  | 2 | 25 | 2002 |
| 10,4 | 8,7  | 0,8 | 2  | 2 | 23 | 2004 |
| 13,3 | 18,2 | 0,8 | 2  | 2 | 25 | 2002 |
| 18,1 | 45,9 | 0,8 | 5  | 2 | 17 | 2012 |
| 14,6 | 24,1 | 0,8 | 3  | 2 | 25 | 2002 |
| 14,7 | 24,6 | 0,8 | 3  | 2 | 23 | 2003 |
| 15,2 | 27,2 | 0,8 | 4  | 2 | 26 | 2005 |
| 15,2 | 27,2 | 0,8 | 4  | 2 | 19 | 2012 |
| 12   | 13,4 | 0,8 | 2  | 2 | 25 | 2007 |
| 11,5 | 11,8 | 0,8 | 2  | 2 | 25 | 2002 |
| 15,5 | 28,9 | 0,8 | 6  | 2 | 25 | 1999 |
| 15,5 | 28,9 | 0,8 | 4  | 2 | 22 | 2002 |

|      |      |     |    |   |    |      |
|------|------|-----|----|---|----|------|
| 11,3 | 11,2 | 0,8 | 2  | 2 | 21 | 2006 |
| 13,8 | 20,4 | 0,8 | 3  | 2 | 25 | 2007 |
| 14   | 21,3 | 0,8 | 3  | 2 | 18 | 2012 |
| 12,4 | 14,8 | 0,8 | 2  | 2 | 23 | 1999 |
| 12,4 | 14,8 | 0,8 | 3  | 2 | 25 | 2005 |
| 13,5 | 19,1 | 0,8 | 3  | 2 | 23 | 2002 |
| 16,1 | 32,4 | 0,8 | 5  | 2 | 21 | 2012 |
| 15,2 | 27,3 | 0,8 | 6  | 2 | 22 | 2000 |
| 14,5 | 23,7 | 0,8 | 4  | 2 | 22 | 2015 |
| 13,7 | 20   | 0,8 | 4  | 2 | 27 | 1999 |
| 13,7 | 20   | 0,8 | 3  | 2 | 26 | 2009 |
| 12,9 | 16,7 | 0,8 | 3  | 2 | 25 | 2007 |
| 13,2 | 17,9 | 0,8 | 2  | 2 | 25 | 2002 |
| 14,2 | 22,3 | 0,8 | 3  | 2 | 15 | 2015 |
| 12,3 | 14,5 | 0,8 | 3  | 2 | 22 | 2005 |
| 14,3 | 22,8 | 0,8 | 7  | 2 | 26 | 1999 |
| 19   | 53,5 | 0,8 | 6  | 2 | 18 | 2012 |
| 15,2 | 27,4 | 0,8 | 4  | 2 | 20 | 2011 |
| 21,4 | 76,5 | 0,8 | 10 | 2 | 16 | 2015 |

|      |      |     |    |   |    |      |
|------|------|-----|----|---|----|------|
| 17,7 | 43,3 | 0,8 | 9  | 2 | 19 | 2000 |
| 15,5 | 29,1 | 0,8 | 5  | 2 | 21 | 2000 |
| 15,3 | 28   | 0,8 | 3  | 2 | 26 | 2000 |
| 15,3 | 28   | 0,8 | 6  | 2 | 19 | 2011 |
| 14,3 | 22,9 | 0,8 | 3  | 2 | 22 | 2002 |
| 18,3 | 48   | 0,8 | 6  | 2 | 19 | 2013 |
| 15,9 | 31,5 | 0,8 | 4  | 2 | 22 | 2002 |
| 13,8 | 20,6 | 0,8 | 6  | 2 | 25 | 2008 |
| 13,5 | 19,3 | 0,8 | 5  | 2 | 26 | 1999 |
| 16,8 | 37,2 | 0,8 | 5  | 2 | 21 | 2012 |
| 15,3 | 28,1 | 0,8 | 4  | 2 | 22 | 2011 |
| 21,5 | 78   | 0,8 | 8  | 2 | 16 | 2015 |
| 19,5 | 58,2 | 0,8 | 10 | 2 | 17 | 2012 |
| 15,7 | 30,4 | 0,8 | 8  | 2 | 23 | 1999 |
| 13,9 | 21,1 | 0,8 | 2  | 2 | 25 | 2002 |
| 15,4 | 28,7 | 0,8 | 7  | 2 | 18 | 2012 |
| 16,4 | 34,7 | 0,8 | 4  | 2 | 26 | 2000 |
| 15,1 | 27,1 | 0,8 | 4  | 2 | 22 | 1999 |
| 15,3 | 28,2 | 0,8 | 4  | 2 | 22 | 2011 |

|      |      |     |   |   |    |      |
|------|------|-----|---|---|----|------|
| 13   | 17,3 | 0,8 | 4 | 2 | 26 | 1999 |
| 13   | 17,3 | 0,8 | 2 | 2 | 22 | 2002 |
| 12,2 | 14,3 | 0,8 | 3 | 2 | 26 | 1999 |
| 15   | 26,6 | 0,8 | 2 | 2 | 22 | 2013 |
| 13,5 | 19,4 | 0,8 | 2 | 2 | 22 | 2002 |
| 16   | 32,3 | 0,8 | 7 | 2 | 19 | 2013 |
| 13,4 | 19   | 0,8 | 2 | 2 | 25 | 2002 |
| 12,3 | 14,7 | 0,8 | 2 | 2 | 25 | 2002 |
| 10   | 7,9  | 0,8 | 2 | 2 | 19 | 2007 |
| 16,1 | 33   | 0,8 | 6 | 2 | 25 | 2005 |
| 15   | 26,7 | 0,8 | 4 | 2 | 26 | 2003 |
| 15,4 | 28,9 | 0,8 | 5 | 2 | 21 | 2012 |
| 13   | 17,4 | 0,8 | 2 | 2 | 22 | 2002 |
| 15,7 | 30,7 | 0,8 | 5 | 2 | 25 | 2005 |
| 12,6 | 15,9 | 0,8 | 2 | 2 | 22 | 2002 |
| 15,5 | 29,6 | 0,8 | 7 | 2 | 17 | 2012 |
| 12,3 | 14,8 | 0,8 | 2 | 2 | 25 | 2008 |
| 14,8 | 25,8 | 0,8 | 5 | 2 | 22 | 2002 |
| 16   | 32,6 | 0,8 | 6 | 2 | 20 | 2011 |

|      |      |     |    |   |    |      |
|------|------|-----|----|---|----|------|
| 12,1 | 14,1 | 0,8 | 2  | 2 | 25 | 2002 |
| 13,1 | 17,9 | 0,8 | 3  | 2 | 22 | 2002 |
| 12,8 | 16,7 | 0,8 | 4  | 2 | 27 | 1999 |
| 13   | 17,5 | 0,8 | 2  | 2 | 22 | 2002 |
| 14,3 | 23,3 | 0,8 | 5  | 2 | 20 | 2007 |
| 17,9 | 45,7 | 0,8 | 10 | 2 | 18 | 2012 |
| 13,9 | 21,4 | 0,8 | 3  | 2 | 26 | 2000 |
| 15,5 | 29,7 | 0,8 | 8  | 2 | 22 | 2002 |
| 16,2 | 34   | 0,8 | 5  | 2 | 21 | 2012 |
| 14,2 | 22,9 | 0,8 | 3  | 2 | 25 | 2002 |
| 9,7  | 7,3  | 0,8 | 2  | 2 | 23 | 2004 |
| 14,5 | 24,4 | 0,8 | 3  | 2 | 25 | 2002 |
| 15,7 | 31   | 0,8 | 7  | 2 | 23 | 1999 |
| 14,8 | 26   | 0,8 | 5  | 2 | 22 | 1999 |
| 17,9 | 46   | 0,8 | 7  | 2 | 18 | 2012 |
| 13,6 | 20,2 | 0,8 | 6  | 2 | 25 | 1999 |
| 13,6 | 20,2 | 0,8 | 5  | 2 | 27 | 1999 |
| 14,4 | 24   | 0,8 | 2  | 2 | 22 | 2003 |
| 12,2 | 14,6 | 0,8 | 3  | 2 | 21 | 2014 |

|      |      |     |   |   |    |      |
|------|------|-----|---|---|----|------|
| 11,7 | 12,9 | 0,8 | 3 | 2 | 25 | 2005 |
| 13   | 17,7 | 0,8 | 2 | 2 | 25 | 2002 |
| 12,3 | 15   | 0,8 | 3 | 2 | 17 | 2012 |
| 16,2 | 34,3 | 0,8 | 6 | 2 | 22 | 2011 |
| 15,3 | 28,9 | 0,8 | 4 | 2 | 19 | 2000 |
| 14,5 | 24,6 | 0,8 | 4 | 2 | 25 | 2002 |
| 13,6 | 20,3 | 0,8 | 2 | 2 | 25 | 2002 |
| 17,3 | 41,8 | 0,8 | 6 | 2 | 24 | 2006 |
| 17,1 | 40,4 | 0,8 | 8 | 2 | 18 | 2012 |
| 13,7 | 20,8 | 0,8 | 5 | 2 | 27 | 1999 |
| 12,5 | 15,8 | 0,8 | 3 | 2 | 26 | 2005 |
| 14   | 22,2 | 0,8 | 3 | 2 | 25 | 2002 |
| 12   | 14   | 0,8 | 3 | 2 | 22 | 2000 |
| 16,5 | 36,4 | 0,8 | 7 | 2 | 26 | 1999 |
| 13,8 | 21,3 | 0,8 | 3 | 2 | 25 | 2002 |
| 12,3 | 15,1 | 0,8 | 2 | 2 | 26 | 2006 |
| 15,2 | 28,5 | 0,8 | 4 | 2 | 27 | 1999 |
| 16,4 | 35,8 | 0,8 | 7 | 2 | 18 | 2012 |
| 15   | 27,4 | 0,8 | 5 | 2 | 17 | 2014 |

|      |      |     |    |   |    |      |
|------|------|-----|----|---|----|------|
| 14,7 | 25,8 | 0,8 | 4  | 2 | 22 | 2011 |
| 11,9 | 13,7 | 0,8 | 2  | 2 | 26 | 2005 |
| 13,2 | 18,7 | 0,8 | 3  | 2 | 26 | 1999 |
| 13,2 | 18,7 | 0,8 | 2  | 2 | 25 | 2002 |
| 13,2 | 18,7 | 0,8 | 4  | 2 | 26 | 2006 |
| 16,6 | 37,2 | 0,8 | 6  | 2 | 21 | 2013 |
| 14,2 | 23,3 | 0,8 | 2  | 2 | 21 | 2000 |
| 14,3 | 23,8 | 0,8 | 3  | 2 | 25 | 2007 |
| 16,3 | 35,3 | 0,8 | 6  | 2 | 20 | 2011 |
| 12,7 | 16,7 | 0,8 | 2  | 2 | 22 | 2002 |
| 17,1 | 40,8 | 0,8 | 6  | 2 | 22 | 2013 |
| 11,2 | 11,5 | 0,8 | 2  | 2 | 22 | 2007 |
| 13,4 | 19,7 | 0,8 | 4  | 2 | 25 | 2005 |
| 13,4 | 19,7 | 0,8 | 4  | 2 | 25 | 2005 |
| 15,1 | 28,2 | 0,8 | 6  | 2 | 21 | 2013 |
| 21,9 | 86,1 | 0,8 | 10 | 2 | 18 | 2012 |
| 15,9 | 33   | 0,8 | 10 | 2 | 26 | 2006 |
| 13,5 | 20,2 | 0,8 | 5  | 2 | 25 | 1999 |
| 13,8 | 21,6 | 0,8 | 4  | 2 | 26 | 2005 |

|      |      |     |    |   |    |      |
|------|------|-----|----|---|----|------|
| 17,4 | 43,3 | 0,8 | 6  | 2 | 20 | 2013 |
| 14,4 | 24,6 | 0,8 | 4  | 2 | 20 | 2011 |
| 22,9 | 99   | 0,8 | 7  | 2 | 18 | 2012 |
| 15,6 | 31,3 | 0,8 | 8  | 2 | 21 | 2010 |
| 15,6 | 31,3 | 0,8 | 8  | 2 | 21 | 2010 |
| 17,4 | 43,5 | 0,8 | 10 | 2 | 18 | 2012 |
| 12,3 | 15,4 | 0,8 | 2  | 2 | 22 | 2002 |
| 14,4 | 24,9 | 0,8 | 4  | 2 | 27 | 1999 |
| 14,4 | 24,9 | 0,8 | 10 | 2 | 26 | 2006 |
| 12,5 | 16,3 | 0,8 | 2  | 2 | 17 | 2012 |
| 18,3 | 51,2 | 0,8 | 7  | 2 | 18 | 2012 |
| 13   | 18,4 | 0,8 | 2  | 2 | 26 | 2006 |
| 15,1 | 28,9 | 0,8 | 4  | 2 | 20 | 2012 |
| 12,6 | 16,8 | 0,8 | 3  | 2 | 26 | 2005 |
| 16,4 | 37,2 | 0,8 | 7  | 2 | 25 | 1999 |
| 12,2 | 15,4 | 0,8 | 2  | 2 | 25 | 2002 |
| 13,4 | 20,5 | 0,9 | 4  | 2 | 26 | 2006 |
| 14,5 | 26,1 | 0,9 | 7  | 2 | 19 | 2012 |
| 14,3 | 25,1 | 0,9 | 5  | 2 | 26 | 2005 |

|      |      |     |    |   |    |      |
|------|------|-----|----|---|----|------|
| 13   | 18,9 | 0,9 | 2  | 2 | 23 | 1999 |
| 13,4 | 20,8 | 0,9 | 2  | 2 | 25 | 2002 |
| 14,2 | 25,1 | 0,9 | 9  | 2 | 26 | 2006 |
| 13,4 | 21,1 | 0,9 | 4  | 2 | 25 | 1999 |
| 16,2 | 37,5 | 0,9 | 5  | 2 | 19 | 2012 |
| 17,1 | 44,3 | 0,9 | 8  | 2 | 21 | 2013 |
| 12,5 | 17,4 | 0,9 | 3  | 2 | 20 | 2003 |
| 11,9 | 15,1 | 0,9 | 2  | 2 | 17 | 2012 |
| 20,6 | 78,8 | 0,9 | 10 | 2 | 19 | 2012 |
| 11,9 | 15,2 | 0,9 | 3  | 2 | 26 | 2005 |
| 15,9 | 36,5 | 0,9 | 7  | 2 | 26 | 2006 |
| 15,1 | 31,4 | 0,9 | 5  | 2 | 23 | 2006 |
| 13,1 | 20,7 | 0,9 | 2  | 2 | 25 | 2002 |
| 13,7 | 23,8 | 0,9 | 9  | 2 | 20 | 2013 |
| 15,6 | 35,2 | 0,9 | 5  | 2 | 21 | 2012 |
| 14,7 | 29,5 | 0,9 | 7  | 2 | 26 | 1999 |
| 20,2 | 76,6 | 0,9 | 10 | 2 | 18 | 2012 |
| 13,4 | 22,4 | 0,9 | 3  | 2 | 20 | 2003 |
| 17   | 46,8 | 1,0 | 7  | 2 | 18 | 2012 |

|      |      |     |   |   |    |      |
|------|------|-----|---|---|----|------|
| 13,7 | 24,7 | 1,0 | 5 | 2 | 25 | 1999 |
| 16,9 | 49,2 | 1,0 | 7 | 2 | 18 | 2012 |
| 13   | 22,4 | 1,0 | 4 | 2 | 23 | 2008 |
| 16,3 | 48,2 | 1,1 | 9 | 2 | 18 | 2000 |
| 14,2 | 36,5 | 1,3 | 7 | 2 | 17 | 2014 |
| 16,7 | 62,5 | 1,3 | 6 | 2 | 19 | 2002 |
| 14,7 | 11,8 | 0,4 | 2 | 1 | 20 | 2002 |
| 14,8 | 12,7 | 0,4 | 4 | 1 | 22 | 2004 |
| 18,7 | 26,5 | 0,4 | 9 | 1 | 21 | 2014 |
| 14,7 | 12,9 | 0,4 | 6 | 1 | 21 | 2013 |
| 12,5 | 8    | 0,4 | 1 | 1 | 20 | 2013 |
| 18,3 | 25,4 | 0,4 | 5 | 1 | 15 | 2015 |
| 16,7 | 19,9 | 0,4 | 6 | 1 | 20 | 2013 |
| 12,6 | 8,6  | 0,4 | 1 | 1 | 20 | 2013 |
| 14,9 | 14,4 | 0,4 | 4 | 1 | 19 | 2004 |
| 16,2 | 18,7 | 0,4 | 4 | 1 | 19 | 2002 |
| 14,3 | 12,9 | 0,4 | 3 | 1 | 20 | 2013 |
| 14,5 | 13,5 | 0,4 | 2 | 1 | 20 | 2013 |
| 15,1 | 15,3 | 0,4 | 4 | 1 | 19 | 2004 |

|      |      |     |   |   |    |      |
|------|------|-----|---|---|----|------|
| 15   | 15,1 | 0,4 | 6 | 1 | 20 | 2013 |
| 21   | 41,7 | 0,5 | 8 | 1 | 19 | 2010 |
| 21   | 41,7 | 0,5 | 8 | 1 | 19 | 2010 |
| 15,7 | 17,5 | 0,5 | 4 | 1 | 19 | 2015 |
| 14,2 | 13   | 0,5 | 4 | 1 | 21 | 2009 |
| 15,4 | 16,6 | 0,5 | 3 | 1 | 19 | 2005 |
| 14,4 | 13,6 | 0,5 | 5 | 1 | 26 | 2006 |
| 14,8 | 14,8 | 0,5 | 4 | 1 | 26 | 2006 |
| 12,2 | 8,3  | 0,5 | 1 | 1 | 20 | 2013 |
| 17,3 | 23,7 | 0,5 | 8 | 1 | 15 | 2015 |
| 14,3 | 13,4 | 0,5 | 3 | 1 | 23 | 2009 |
| 14,7 | 14,7 | 0,5 | 2 | 1 | 20 | 2013 |
| 16   | 19   | 0,5 | 4 | 1 | 19 | 2015 |
| 14,3 | 13,6 | 0,5 | 3 | 1 | 23 | 2010 |
| 14,3 | 13,6 | 0,5 | 3 | 1 | 23 | 2010 |
| 14,5 | 14,2 | 0,5 | 5 | 1 | 20 | 2013 |
| 16   | 19,2 | 0,5 | 4 | 1 | 26 | 2006 |
| 17,1 | 23,5 | 0,5 | 5 | 1 | 17 | 2002 |
| 14   | 12,9 | 0,5 | 4 | 1 | 23 | 2009 |

|      |      |     |   |   |    |      |
|------|------|-----|---|---|----|------|
| 15,7 | 18,2 | 0,5 | 4 | 1 | 20 | 2001 |
| 17,6 | 25,7 | 0,5 | 5 | 1 | 21 | 2010 |
| 17,6 | 25,7 | 0,5 | 5 | 1 | 21 | 2010 |
| 15,5 | 17,6 | 0,5 | 4 | 1 | 23 | 2001 |
| 13,9 | 12,7 | 0,5 | 2 | 1 | 20 | 2010 |
| 13,9 | 12,7 | 0,5 | 2 | 1 | 20 | 2010 |
| 13,6 | 11,9 | 0,5 | 2 | 1 | 20 | 2013 |
| 15,4 | 17,3 | 0,5 | 6 | 1 | 21 | 2011 |
| 13,4 | 11,4 | 0,5 | 3 | 1 | 23 | 2010 |
| 13,4 | 11,4 | 0,5 | 3 | 1 | 23 | 2010 |
| 14,9 | 15,7 | 0,5 | 3 | 1 | 20 | 2012 |
| 12,9 | 10,2 | 0,5 | 3 | 1 | 18 | 2008 |
| 15,9 | 19,1 | 0,5 | 4 | 1 | 23 | 2001 |
| 14,7 | 15,1 | 0,5 | 2 | 1 | 21 | 2010 |
| 14,7 | 15,1 | 0,5 | 2 | 1 | 21 | 2010 |
| 14,7 | 15,1 | 0,5 | 6 | 1 | 20 | 2013 |
| 13,5 | 11,7 | 0,5 | 3 | 1 | 20 | 2009 |
| 13,9 | 12,8 | 0,5 | 2 | 1 | 18 | 2000 |
| 13,9 | 12,8 | 0,5 | 4 | 1 | 23 | 2006 |

|      |      |     |   |   |    |      |
|------|------|-----|---|---|----|------|
| 14   | 13,1 | 0,5 | 4 | 1 | 15 | 2015 |
| 17,8 | 27   | 0,5 | 5 | 1 | 18 | 2015 |
| 15,4 | 17,5 | 0,5 | 4 | 1 | 19 | 2009 |
| 13,8 | 12,6 | 0,5 | 2 | 1 | 20 | 2000 |
| 17   | 23,6 | 0,5 | 5 | 1 | 23 | 2010 |
| 17   | 23,6 | 0,5 | 5 | 1 | 23 | 2010 |
| 14   | 13,2 | 0,5 | 4 | 1 | 26 | 2006 |
| 14   | 13,2 | 0,5 | 4 | 1 | 21 | 2011 |
| 14   | 13,2 | 0,5 | 2 | 1 | 19 | 2014 |
| 14,8 | 15,6 | 0,5 | 4 | 1 | 22 | 2011 |
| 13,4 | 11,6 | 0,5 | 2 | 1 | 20 | 2004 |
| 15,8 | 19,1 | 0,5 | 4 | 1 | 20 | 2001 |
| 15,1 | 16,7 | 0,5 | 5 | 1 | 21 | 2009 |
| 12,5 | 9,5  | 0,5 | 1 | 1 | 20 | 2013 |
| 15,2 | 17,1 | 0,5 | 4 | 1 | 23 | 2005 |
| 12,4 | 9,3  | 0,5 | 2 | 1 | 20 | 2013 |
| 15,1 | 16,8 | 0,5 | 5 | 1 | 19 | 2010 |
| 15,1 | 16,8 | 0,5 | 5 | 1 | 19 | 2010 |
| 14   | 13,4 | 0,5 | 5 | 1 | 23 | 2010 |

|      |      |     |   |   |    |      |
|------|------|-----|---|---|----|------|
| 14   | 13,4 | 0,5 | 5 | 1 | 23 | 2010 |
| 14,6 | 15,2 | 0,5 | 4 | 1 | 26 | 2006 |
| 15,3 | 17,5 | 0,5 | 3 | 1 | 26 | 2006 |
| 16,1 | 20,4 | 0,5 | 4 | 1 | 21 | 2001 |
| 16,3 | 21,2 | 0,5 | 3 | 1 | 18 | 2002 |
| 12,6 | 9,8  | 0,5 | 2 | 1 | 20 | 2013 |
| 17,1 | 24,5 | 0,5 | 6 | 1 | 22 | 2011 |
| 15,7 | 19   | 0,5 | 5 | 1 | 20 | 2013 |
| 16,1 | 20,5 | 0,5 | 5 | 1 | 21 | 2010 |
| 16,1 | 20,5 | 0,5 | 5 | 1 | 21 | 2010 |
| 17,2 | 25   | 0,5 | 6 | 1 | 18 | 2015 |
| 13,2 | 11,3 | 0,5 | 2 | 1 | 26 | 2006 |
| 15,5 | 18,3 | 0,5 | 4 | 1 | 21 | 2010 |
| 15,5 | 18,3 | 0,5 | 4 | 1 | 21 | 2010 |
| 12,5 | 9,6  | 0,5 | 2 | 1 | 20 | 2004 |
| 13,5 | 12,1 | 0,5 | 3 | 1 | 22 | 2005 |
| 15   | 16,6 | 0,5 | 4 | 1 | 20 | 2013 |
| 14   | 13,5 | 0,5 | 7 | 1 | 21 | 2009 |
| 14,2 | 14,1 | 0,5 | 2 | 1 | 20 | 2013 |

|      |      |     |   |   |    |      |
|------|------|-----|---|---|----|------|
| 14,3 | 14,4 | 0,5 | 4 | 1 | 21 | 2009 |
| 17,5 | 26,4 | 0,5 | 8 | 1 | 15 | 2015 |
| 12,7 | 10,1 | 0,5 | 2 | 1 | 25 | 2007 |
| 15,7 | 19,1 | 0,5 | 6 | 1 | 19 | 2000 |
| 14,8 | 16   | 0,5 | 3 | 1 | 19 | 2015 |
| 16,3 | 21,4 | 0,5 | 4 | 1 | 23 | 2010 |
| 16,3 | 21,4 | 0,5 | 4 | 1 | 23 | 2010 |
| 16,4 | 21,8 | 0,5 | 4 | 1 | 19 | 2015 |
| 13,4 | 11,9 | 0,5 | 3 | 1 | 23 | 2004 |
| 13,4 | 11,9 | 0,5 | 3 | 1 | 21 | 2009 |
| 15,2 | 17,4 | 0,5 | 4 | 1 | 22 | 2004 |
| 16   | 20,3 | 0,5 | 4 | 1 | 19 | 2013 |
| 14   | 13,6 | 0,5 | 5 | 1 | 23 | 2007 |
| 14,1 | 13,9 | 0,5 | 3 | 1 | 20 | 2002 |
| 14,1 | 13,9 | 0,5 | 3 | 1 | 19 | 2015 |
| 14,3 | 14,5 | 0,5 | 3 | 1 | 19 | 2015 |
| 14,2 | 14,2 | 0,5 | 6 | 1 | 26 | 2006 |
| 14,2 | 14,2 | 0,5 | 5 | 1 | 22 | 2007 |
| 13   | 10,9 | 0,5 | 2 | 1 | 23 | 2009 |

|      |      |     |   |   |    |      |
|------|------|-----|---|---|----|------|
| 13   | 10,9 | 0,5 | 2 | 1 | 20 | 2013 |
| 17   | 24,4 | 0,5 | 5 | 1 | 26 | 1999 |
| 15,8 | 19,6 | 0,5 | 5 | 1 | 19 | 2014 |
| 15,8 | 19,6 | 0,5 | 8 | 1 | 18 | 2015 |
| 13,6 | 12,5 | 0,5 | 3 | 1 | 23 | 2010 |
| 13,6 | 12,5 | 0,5 | 3 | 1 | 23 | 2010 |
| 12   | 8,6  | 0,5 | 2 | 1 | 18 | 2007 |
| 12   | 8,6  | 0,5 | 2 | 1 | 18 | 2007 |
| 13,7 | 12,8 | 0,5 | 8 | 1 | 23 | 2010 |
| 13,7 | 12,8 | 0,5 | 8 | 1 | 23 | 2010 |
| 16   | 20,4 | 0,5 | 8 | 1 | 15 | 2015 |
| 14,6 | 15,5 | 0,5 | 4 | 1 | 20 | 2011 |
| 16,1 | 20,8 | 0,5 | 5 | 1 | 21 | 2010 |
| 16,1 | 20,8 | 0,5 | 5 | 1 | 21 | 2010 |
| 12,9 | 10,7 | 0,5 | 2 | 1 | 20 | 2001 |
| 13,8 | 13,1 | 0,5 | 3 | 1 | 23 | 2010 |
| 13,8 | 13,1 | 0,5 | 3 | 1 | 23 | 2010 |
| 15,7 | 19,3 | 0,5 | 4 | 1 | 21 | 2009 |
| 20,5 | 43   | 0,5 | 6 | 1 | 20 | 2012 |

|      |      |     |   |   |    |      |
|------|------|-----|---|---|----|------|
| 14   | 13,7 | 0,5 | 3 | 1 | 23 | 2004 |
| 14,1 | 14   | 0,5 | 4 | 1 | 25 | 2004 |
| 14,1 | 14   | 0,5 | 5 | 1 | 23 | 2007 |
| 14,1 | 14   | 0,5 | 4 | 1 | 22 | 2009 |
| 14,2 | 14,3 | 0,5 | 5 | 1 | 23 | 2010 |
| 14,2 | 14,3 | 0,5 | 5 | 1 | 23 | 2010 |
| 15,3 | 17,9 | 0,5 | 5 | 1 | 18 | 2012 |
| 15,3 | 17,9 | 0,5 | 5 | 1 | 20 | 2013 |
| 13,2 | 11,5 | 0,5 | 3 | 1 | 23 | 2010 |
| 13,2 | 11,5 | 0,5 | 3 | 1 | 23 | 2010 |
| 14,7 | 15,9 | 0,5 | 3 | 1 | 22 | 2003 |
| 16,4 | 22,1 | 0,5 | 9 | 1 | 25 | 2004 |
| 15,2 | 17,6 | 0,5 | 4 | 1 | 23 | 2009 |
| 15,7 | 19,4 | 0,5 | 3 | 1 | 17 | 2008 |
| 13,7 | 12,9 | 0,5 | 3 | 1 | 23 | 2010 |
| 13,7 | 12,9 | 0,5 | 3 | 1 | 23 | 2010 |
| 15,5 | 18,7 | 0,5 | 4 | 1 | 18 | 2015 |
| 15,3 | 18   | 0,5 | 3 | 1 | 20 | 2013 |
| 13,1 | 11,3 | 0,5 | 2 | 1 | 17 | 2008 |

|      |      |     |   |   |    |      |
|------|------|-----|---|---|----|------|
| 13,4 | 12,1 | 0,5 | 2 | 1 | 26 | 2006 |
| 14,2 | 14,4 | 0,5 | 3 | 1 | 23 | 2010 |
| 14,2 | 14,4 | 0,5 | 3 | 1 | 23 | 2010 |
| 12,9 | 10,8 | 0,5 | 2 | 1 | 21 | 2006 |
| 16,1 | 21   | 0,5 | 4 | 1 | 20 | 2013 |
| 16,2 | 21,4 | 0,5 | 6 | 1 | 25 | 2003 |
| 12,4 | 9,6  | 0,5 | 2 | 1 | 25 | 2004 |
| 20,1 | 40,9 | 0,5 | 4 | 1 | 21 | 2010 |
| 20,1 | 40,9 | 0,5 | 4 | 1 | 21 | 2010 |
| 15   | 17   | 0,5 | 4 | 1 | 22 | 2004 |
| 15   | 17   | 0,5 | 4 | 1 | 15 | 2015 |
| 15,4 | 18,4 | 0,5 | 3 | 1 | 22 | 2003 |
| 13,5 | 12,4 | 0,5 | 2 | 1 | 21 | 2010 |
| 13,5 | 12,4 | 0,5 | 2 | 1 | 21 | 2010 |
| 15,2 | 17,7 | 0,5 | 3 | 1 | 18 | 2007 |
| 15,8 | 19,9 | 0,5 | 6 | 1 | 23 | 2010 |
| 15,8 | 19,9 | 0,5 | 6 | 1 | 23 | 2010 |
| 17   | 24,8 | 0,5 | 8 | 1 | 18 | 2008 |
| 14,5 | 15,4 | 0,5 | 3 | 1 | 22 | 2011 |

|      |      |     |   |   |    |      |
|------|------|-----|---|---|----|------|
| 13   | 11,1 | 0,5 | 2 | 1 | 20 | 2001 |
| 16,5 | 22,7 | 0,5 | 7 | 1 | 16 | 2015 |
| 17,5 | 27,1 | 0,5 | 5 | 1 | 19 | 2013 |
| 13,3 | 11,9 | 0,5 | 2 | 1 | 20 | 2013 |
| 16,8 | 24   | 0,5 | 4 | 1 | 18 | 2012 |
| 11,5 | 7,7  | 0,5 | 2 | 1 | 25 | 2004 |
| 15,4 | 18,5 | 0,5 | 4 | 1 | 19 | 2006 |
| 14   | 13,9 | 0,5 | 2 | 1 | 17 | 2014 |
| 14,1 | 14,2 | 0,5 | 3 | 1 | 19 | 2009 |
| 14,1 | 14,2 | 0,5 | 2 | 1 | 20 | 2012 |
| 12,2 | 9,2  | 0,5 | 2 | 1 | 21 | 2011 |
| 16,7 | 23,6 | 0,5 | 4 | 1 | 20 | 2004 |
| 16,7 | 23,6 | 0,5 | 4 | 1 | 21 | 2010 |
| 16,7 | 23,6 | 0,5 | 4 | 1 | 21 | 2010 |
| 14,7 | 16,1 | 0,5 | 5 | 1 | 23 | 2010 |
| 14,7 | 16,1 | 0,5 | 5 | 1 | 23 | 2010 |
| 16,4 | 22,4 | 0,5 | 8 | 1 | 20 | 2010 |
| 16,4 | 22,4 | 0,5 | 8 | 1 | 20 | 2010 |
| 16,4 | 22,4 | 0,5 | 6 | 1 | 23 | 2011 |

|      |      |     |   |   |    |      |
|------|------|-----|---|---|----|------|
| 15,1 | 17,5 | 0,5 | 4 | 1 | 22 | 2011 |
| 17   | 25   | 0,5 | 6 | 1 | 21 | 2010 |
| 17   | 25   | 0,5 | 6 | 1 | 21 | 2010 |
| 14,8 | 16,5 | 0,5 | 2 | 1 | 21 | 2000 |
| 15,7 | 19,7 | 0,5 | 4 | 1 | 20 | 2009 |
| 12   | 8,8  | 0,5 | 1 | 1 | 21 | 2005 |
| 18   | 29,7 | 0,5 | 5 | 1 | 20 | 2010 |
| 18   | 29,7 | 0,5 | 5 | 1 | 20 | 2010 |
| 13,7 | 13,1 | 0,5 | 2 | 1 | 23 | 2006 |
| 14,3 | 14,9 | 0,5 | 2 | 1 | 18 | 2002 |
| 14,3 | 14,9 | 0,5 | 4 | 1 | 22 | 2009 |
| 15,2 | 17,9 | 0,5 | 5 | 1 | 18 | 2000 |
| 13,8 | 13,4 | 0,5 | 3 | 1 | 21 | 2005 |
| 14,2 | 14,6 | 0,5 | 4 | 1 | 19 | 2015 |
| 14,2 | 14,6 | 0,5 | 3 | 1 | 19 | 2015 |
| 13,3 | 12   | 0,5 | 3 | 1 | 22 | 2001 |
| 14,1 | 14,3 | 0,5 | 3 | 1 | 20 | 2004 |
| 14,1 | 14,3 | 0,5 | 7 | 1 | 22 | 2009 |
| 14,1 | 14,3 | 0,5 | 3 | 1 | 16 | 2015 |

|      |      |     |   |   |    |      |
|------|------|-----|---|---|----|------|
| 16,1 | 21,3 | 0,5 | 4 | 1 | 20 | 2012 |
| 12,3 | 9,5  | 0,5 | 2 | 1 | 23 | 2010 |
| 12,3 | 9,5  | 0,5 | 2 | 1 | 23 | 2010 |
| 14,9 | 16,9 | 0,5 | 3 | 1 | 23 | 2001 |
| 14,6 | 15,9 | 0,5 | 4 | 1 | 20 | 2008 |
| 15,3 | 18,3 | 0,5 | 4 | 1 | 18 | 2015 |
| 13,4 | 12,3 | 0,5 | 3 | 1 | 19 | 2015 |
| 13,1 | 11,5 | 0,5 | 2 | 1 | 20 | 2013 |
| 13,1 | 11,5 | 0,5 | 2 | 1 | 20 | 2013 |
| 14,5 | 15,6 | 0,5 | 5 | 1 | 23 | 1999 |
| 17,3 | 26,5 | 0,5 | 4 | 1 | 15 | 2015 |
| 12,5 | 10   | 0,5 | 2 | 1 | 19 | 2007 |
| 17,7 | 28,4 | 0,5 | 7 | 1 | 18 | 2015 |
| 12,2 | 9,3  | 0,5 | 2 | 1 | 18 | 2007 |
| 14,4 | 15,3 | 0,5 | 6 | 1 | 19 | 2008 |
| 14,4 | 15,3 | 0,5 | 4 | 1 | 20 | 2009 |
| 15,9 | 20,6 | 0,5 | 5 | 1 | 19 | 1999 |
| 11,6 | 8    | 0,5 | 2 | 1 | 22 | 2009 |
| 15   | 17,3 | 0,5 | 5 | 1 | 26 | 2006 |

|      |      |     |   |   |    |      |
|------|------|-----|---|---|----|------|
| 15   | 17,3 | 0,5 | 5 | 1 | 23 | 2010 |
| 15   | 17,3 | 0,5 | 5 | 1 | 23 | 2010 |
| 16   | 21   | 0,5 | 4 | 1 | 20 | 2012 |
| 16   | 21   | 0,5 | 4 | 1 | 16 | 2015 |
| 17   | 25,2 | 0,5 | 4 | 1 | 17 | 2014 |
| 14,3 | 15   | 0,5 | 3 | 1 | 18 | 2002 |
| 14,3 | 15   | 0,5 | 3 | 1 | 19 | 2008 |
| 14,2 | 14,7 | 0,5 | 2 | 1 | 20 | 2010 |
| 14,2 | 14,7 | 0,5 | 2 | 1 | 20 | 2010 |
| 14,2 | 14,7 | 0,5 | 2 | 1 | 20 | 2013 |
| 15,6 | 19,5 | 0,5 | 5 | 1 | 20 | 2012 |
| 15,6 | 19,5 | 0,5 | 5 | 1 | 20 | 2012 |
| 15,3 | 18,4 | 0,5 | 5 | 1 | 21 | 2009 |
| 13,9 | 13,8 | 0,5 | 4 | 1 | 22 | 2013 |
| 14   | 14,1 | 0,5 | 3 | 1 | 26 | 2006 |
| 16,8 | 24,4 | 0,5 | 6 | 1 | 23 | 2005 |
| 15,4 | 18,8 | 0,5 | 6 | 1 | 26 | 2006 |
| 12,8 | 10,8 | 0,5 | 2 | 1 | 18 | 2007 |
| 12,8 | 10,8 | 0,5 | 3 | 1 | 18 | 2015 |

|      |      |     |    |   |    |      |
|------|------|-----|----|---|----|------|
| 16,2 | 21,9 | 0,5 | 7  | 1 | 21 | 2014 |
| 16,2 | 21,9 | 0,5 | 7  | 1 | 23 | 2014 |
| 16   | 21,1 | 0,5 | 3  | 1 | 19 | 2010 |
| 16   | 21,1 | 0,5 | 3  | 1 | 19 | 2010 |
| 14,8 | 16,7 | 0,5 | 4  | 1 | 23 | 2011 |
| 16,7 | 24   | 0,5 | 7  | 1 | 18 | 2015 |
| 15,2 | 18,1 | 0,5 | 5  | 1 | 19 | 1999 |
| 15,5 | 19,2 | 0,5 | 6  | 1 | 15 | 2015 |
| 18,2 | 31,1 | 0,5 | 10 | 1 | 21 | 2015 |
| 17,9 | 29,6 | 0,5 | 7  | 1 | 20 | 2012 |
| 17,4 | 27,2 | 0,5 | 4  | 1 | 18 | 2015 |
| 15,7 | 20   | 0,5 | 4  | 1 | 22 | 2011 |
| 15,7 | 20   | 0,5 | 3  | 1 | 20 | 2013 |
| 14,2 | 14,8 | 0,5 | 2  | 1 | 20 | 2013 |
| 15,8 | 20,4 | 0,5 | 4  | 1 | 19 | 2004 |
| 13,2 | 11,9 | 0,5 | 2  | 1 | 25 | 2003 |
| 16,7 | 24,1 | 0,5 | 6  | 1 | 22 | 2011 |
| 12,7 | 10,6 | 0,5 | 2  | 1 | 20 | 2013 |
| 13,8 | 13,6 | 0,5 | 3  | 1 | 20 | 2013 |

|      |      |     |   |   |    |      |
|------|------|-----|---|---|----|------|
| 14   | 14,2 | 0,5 | 3 | 1 | 17 | 2014 |
| 14   | 14,2 | 0,5 | 4 | 1 | 21 | 2015 |
| 16   | 21,2 | 0,5 | 6 | 1 | 20 | 2013 |
| 16,1 | 21,6 | 0,5 | 4 | 1 | 20 | 2013 |
| 16,1 | 21,6 | 0,5 | 3 | 1 | 15 | 2015 |
| 17,1 | 25,9 | 0,5 | 4 | 1 | 17 | 2014 |
| 17,1 | 25,9 | 0,5 | 4 | 1 | 18 | 2015 |
| 14,8 | 16,8 | 0,5 | 3 | 1 | 16 | 2008 |
| 14,5 | 15,8 | 0,5 | 4 | 1 | 21 | 2011 |
| 15,5 | 19,3 | 0,5 | 5 | 1 | 23 | 2010 |
| 15,5 | 19,3 | 0,5 | 5 | 1 | 23 | 2010 |
| 15   | 17,5 | 0,5 | 3 | 1 | 26 | 2006 |
| 15,6 | 19,7 | 0,5 | 5 | 1 | 21 | 2010 |
| 15,6 | 19,7 | 0,5 | 5 | 1 | 21 | 2010 |
| 19,9 | 40,9 | 0,5 | 6 | 1 | 20 | 2013 |
| 14,4 | 15,5 | 0,5 | 4 | 1 | 21 | 2009 |
| 12,4 | 9,9  | 0,5 | 2 | 1 | 23 | 2010 |
| 12,4 | 9,9  | 0,5 | 2 | 1 | 23 | 2010 |
| 15,3 | 18,6 | 0,5 | 5 | 1 | 25 | 2004 |

|      |      |     |    |   |    |      |
|------|------|-----|----|---|----|------|
| 15,3 | 18,6 | 0,5 | 10 | 1 | 26 | 2006 |
| 15,3 | 18,6 | 0,5 | 5  | 1 | 18 | 2007 |
| 15,3 | 18,6 | 0,5 | 9  | 1 | 19 | 2011 |
| 13,4 | 12,5 | 0,5 | 2  | 1 | 21 | 2009 |
| 13,4 | 12,5 | 0,5 | 2  | 1 | 22 | 2011 |
| 16,3 | 22,5 | 0,5 | 5  | 1 | 18 | 2002 |
| 12,8 | 10,9 | 0,5 | 2  | 1 | 18 | 2007 |
| 14,3 | 15,2 | 0,5 | 5  | 1 | 22 | 2011 |
| 15,1 | 17,9 | 0,5 | 5  | 1 | 23 | 2010 |
| 15,1 | 17,9 | 0,5 | 5  | 1 | 23 | 2010 |
| 15,1 | 17,9 | 0,5 | 5  | 1 | 20 | 2012 |
| 14,9 | 17,2 | 0,5 | 4  | 1 | 23 | 2001 |
| 14,2 | 14,9 | 0,5 | 3  | 1 | 21 | 2005 |
| 14,2 | 14,9 | 0,5 | 3  | 1 | 19 | 2008 |
| 14,2 | 14,9 | 0,5 | 4  | 1 | 20 | 2009 |
| 14,2 | 14,9 | 0,5 | 3  | 1 | 20 | 2009 |
| 13,1 | 11,7 | 0,5 | 2  | 1 | 20 | 2013 |
| 14,6 | 16,2 | 0,5 | 6  | 1 | 26 | 2006 |
| 14,6 | 16,2 | 0,5 | 6  | 1 | 23 | 2010 |

|      |      |     |    |   |    |      |
|------|------|-----|----|---|----|------|
| 14,6 | 16,2 | 0,5 | 6  | 1 | 23 | 2010 |
| 14,6 | 16,2 | 0,5 | 3  | 1 | 16 | 2015 |
| 16,5 | 23,4 | 0,5 | 6  | 1 | 19 | 2011 |
| 17,6 | 28,4 | 0,5 | 10 | 1 | 19 | 2012 |
| 13,7 | 13,4 | 0,5 | 5  | 1 | 20 | 2011 |
| 14   | 14,3 | 0,5 | 2  | 1 | 23 | 2001 |
| 14   | 14,3 | 0,5 | 2  | 1 | 18 | 2008 |
| 13,8 | 13,7 | 0,5 | 2  | 1 | 23 | 2001 |
| 13,8 | 13,7 | 0,5 | 4  | 1 | 19 | 2015 |
| 13,9 | 14   | 0,5 | 2  | 1 | 26 | 2006 |
| 14,8 | 16,9 | 0,5 | 3  | 1 | 23 | 2001 |
| 15   | 17,6 | 0,5 | 5  | 1 | 19 | 2007 |
| 14,5 | 15,9 | 0,5 | 2  | 1 | 23 | 2001 |
| 14,5 | 15,9 | 0,5 | 3  | 1 | 21 | 2010 |
| 14,5 | 15,9 | 0,5 | 3  | 1 | 21 | 2010 |
| 13,2 | 12   | 0,5 | 3  | 1 | 18 | 2007 |
| 15,7 | 20,2 | 0,5 | 8  | 1 | 22 | 2004 |
| 15,3 | 18,7 | 0,5 | 3  | 1 | 20 | 2010 |
| 15,3 | 18,7 | 0,5 | 3  | 1 | 20 | 2010 |

|      |      |     |   |   |    |      |
|------|------|-----|---|---|----|------|
| 16,2 | 22,2 | 0,5 | 4 | 1 | 20 | 2013 |
| 12,7 | 10,7 | 0,5 | 2 | 1 | 26 | 2006 |
| 14,7 | 16,6 | 0,5 | 3 | 1 | 20 | 2010 |
| 14,7 | 16,6 | 0,5 | 3 | 1 | 20 | 2010 |
| 15,4 | 19,1 | 0,5 | 4 | 1 | 19 | 2004 |
| 14,9 | 17,3 | 0,5 | 4 | 1 | 20 | 2004 |
| 14,3 | 15,3 | 0,5 | 4 | 1 | 25 | 2004 |
| 14,3 | 15,3 | 0,5 | 3 | 1 | 21 | 2010 |
| 14,3 | 15,3 | 0,5 | 3 | 1 | 21 | 2010 |
| 14,3 | 15,3 | 0,5 | 5 | 1 | 20 | 2013 |
| 14,6 | 16,3 | 0,5 | 3 | 1 | 19 | 2009 |
| 14,2 | 15   | 0,5 | 3 | 1 | 19 | 2004 |
| 14,2 | 15   | 0,5 | 2 | 1 | 19 | 2012 |
| 16,7 | 24,4 | 0,5 | 4 | 1 | 22 | 2009 |
| 16,7 | 24,4 | 0,5 | 3 | 1 | 22 | 2015 |
| 14,1 | 14,7 | 0,5 | 3 | 1 | 20 | 2010 |
| 14,1 | 14,7 | 0,5 | 3 | 1 | 20 | 2010 |
| 15   | 17,7 | 0,5 | 4 | 1 | 19 | 2007 |
| 16,2 | 22,3 | 0,5 | 5 | 1 | 21 | 2000 |

|      |      |     |   |   |    |      |
|------|------|-----|---|---|----|------|
| 13,6 | 13,2 | 0,5 | 2 | 1 | 20 | 2012 |
| 13,6 | 13,2 | 0,5 | 4 | 1 | 21 | 2015 |
| 14   | 14,4 | 0,5 | 4 | 1 | 20 | 2004 |
| 15,8 | 20,7 | 0,5 | 4 | 1 | 17 | 2014 |
| 14,5 | 16   | 0,5 | 3 | 1 | 18 | 2000 |
| 14,5 | 16   | 0,5 | 2 | 1 | 23 | 2001 |
| 14,5 | 16   | 0,5 | 4 | 1 | 21 | 2009 |
| 13,1 | 11,8 | 0,5 | 2 | 1 | 23 | 2001 |
| 13,1 | 11,8 | 0,5 | 2 | 1 | 21 | 2009 |
| 15,3 | 18,8 | 0,5 | 3 | 1 | 20 | 1999 |
| 15,3 | 18,8 | 0,5 | 3 | 1 | 18 | 2015 |
| 15,9 | 21,1 | 0,5 | 4 | 1 | 18 | 2015 |
| 13,7 | 13,5 | 0,5 | 5 | 1 | 21 | 2000 |
| 13,7 | 13,5 | 0,5 | 2 | 1 | 21 | 2009 |
| 13,7 | 13,5 | 0,5 | 2 | 1 | 21 | 2009 |
| 13,7 | 13,5 | 0,5 | 5 | 1 | 21 | 2011 |
| 13,8 | 13,8 | 0,5 | 3 | 1 | 23 | 2010 |
| 13,8 | 13,8 | 0,5 | 3 | 1 | 23 | 2010 |
| 13,8 | 13,8 | 0,5 | 2 | 1 | 19 | 2013 |

|      |      |     |   |   |    |      |
|------|------|-----|---|---|----|------|
| 14,7 | 16,7 | 0,5 | 5 | 1 | 22 | 2009 |
| 14,7 | 16,7 | 0,5 | 3 | 1 | 22 | 2011 |
| 14,9 | 17,4 | 0,5 | 4 | 1 | 19 | 2004 |
| 11,5 | 8    | 0,5 | 1 | 1 | 21 | 2009 |
| 16,7 | 24,5 | 0,5 | 5 | 1 | 19 | 2009 |
| 15,5 | 19,6 | 0,5 | 4 | 1 | 17 | 2002 |
| 16,3 | 22,8 | 0,5 | 3 | 1 | 18 | 2015 |
| 14,3 | 15,4 | 0,5 | 3 | 1 | 23 | 2008 |
| 15,2 | 18,5 | 0,5 | 4 | 1 | 22 | 2005 |
| 15,2 | 18,5 | 0,5 | 3 | 1 | 22 | 2011 |
| 15,6 | 20   | 0,5 | 4 | 1 | 22 | 2011 |
| 16,6 | 24,1 | 0,5 | 4 | 1 | 20 | 2010 |
| 16,6 | 24,1 | 0,5 | 4 | 1 | 20 | 2010 |
| 16,2 | 22,4 | 0,5 | 4 | 1 | 18 | 2008 |
| 16,2 | 22,4 | 0,5 | 6 | 1 | 20 | 2013 |
| 16,2 | 22,4 | 0,5 | 3 | 1 | 17 | 2014 |
| 13,3 | 12,4 | 0,5 | 2 | 1 | 20 | 2009 |
| 15,7 | 20,4 | 0,5 | 4 | 1 | 19 | 2013 |
| 15,7 | 20,4 | 0,5 | 3 | 1 | 18 | 2015 |

|      |      |     |   |   |    |      |
|------|------|-----|---|---|----|------|
| 15,8 | 20,8 | 0,5 | 3 | 1 | 20 | 2010 |
| 15,8 | 20,8 | 0,5 | 3 | 1 | 20 | 2010 |
| 16   | 21,6 | 0,5 | 4 | 1 | 19 | 2004 |
| 14,2 | 15,1 | 0,5 | 3 | 1 | 16 | 2015 |
| 15   | 17,8 | 0,5 | 3 | 1 | 20 | 2010 |
| 15   | 17,8 | 0,5 | 3 | 1 | 20 | 2010 |
| 15   | 17,8 | 0,5 | 4 | 1 | 18 | 2015 |
| 15   | 17,8 | 0,5 | 4 | 1 | 18 | 2015 |
| 14,8 | 17,1 | 0,5 | 3 | 1 | 23 | 2001 |
| 13,4 | 12,7 | 0,5 | 2 | 1 | 19 | 2007 |
| 13,4 | 12,7 | 0,5 | 4 | 1 | 21 | 2009 |
| 13,4 | 12,7 | 0,5 | 4 | 1 | 21 | 2009 |
| 14,1 | 14,8 | 0,5 | 3 | 1 | 15 | 2015 |
| 13   | 11,6 | 0,5 | 2 | 1 | 23 | 2009 |
| 13   | 11,6 | 0,5 | 2 | 1 | 20 | 2013 |
| 13,5 | 13   | 0,5 | 2 | 1 | 19 | 2012 |
| 14   | 14,5 | 0,5 | 2 | 1 | 18 | 2008 |
| 14   | 14,5 | 0,5 | 2 | 1 | 20 | 2013 |
| 15,1 | 18,2 | 0,5 | 5 | 1 | 18 | 2007 |

|      |      |     |   |   |    |      |
|------|------|-----|---|---|----|------|
| 15,1 | 18,2 | 0,5 | 4 | 1 | 20 | 2012 |
| 13,9 | 14,2 | 0,5 | 2 | 1 | 26 | 2006 |
| 14,7 | 16,8 | 0,5 | 4 | 1 | 21 | 2009 |
| 15,5 | 19,7 | 0,5 | 5 | 1 | 26 | 2006 |
| 15,5 | 19,7 | 0,5 | 4 | 1 | 20 | 2010 |
| 15,5 | 19,7 | 0,5 | 4 | 1 | 20 | 2010 |
| 15,5 | 19,7 | 0,5 | 4 | 1 | 20 | 2013 |
| 14,4 | 15,8 | 0,5 | 3 | 1 | 26 | 2006 |
| 17   | 26   | 0,5 | 4 | 1 | 20 | 2013 |
| 16,2 | 22,5 | 0,5 | 4 | 1 | 21 | 1999 |
| 16,2 | 22,5 | 0,5 | 4 | 1 | 20 | 2013 |
| 13,1 | 11,9 | 0,5 | 3 | 1 | 20 | 2004 |
| 13,1 | 11,9 | 0,5 | 2 | 1 | 20 | 2013 |
| 12,4 | 10,1 | 0,5 | 3 | 1 | 19 | 2015 |
| 16   | 21,7 | 0,5 | 4 | 1 | 19 | 2012 |
| 15,9 | 21,3 | 0,5 | 4 | 1 | 19 | 2004 |
| 17,9 | 30,4 | 0,5 | 6 | 1 | 23 | 2001 |
| 16,7 | 24,7 | 0,5 | 8 | 1 | 22 | 2015 |
| 15   | 17,9 | 0,5 | 4 | 1 | 19 | 2009 |

|      |      |     |   |   |    |      |
|------|------|-----|---|---|----|------|
| 15   | 17,9 | 0,5 | 4 | 1 | 23 | 2011 |
| 15   | 17,9 | 0,5 | 2 | 1 | 19 | 2013 |
| 15,3 | 19   | 0,5 | 4 | 1 | 18 | 2000 |
| 14,8 | 17,2 | 0,5 | 4 | 1 | 20 | 2009 |
| 14,8 | 17,2 | 0,5 | 3 | 1 | 20 | 2013 |
| 12,1 | 9,4  | 0,5 | 2 | 1 | 18 | 2007 |
| 17,3 | 27,5 | 0,5 | 4 | 1 | 16 | 2015 |
| 15,4 | 19,4 | 0,5 | 3 | 1 | 21 | 2001 |
| 15,4 | 19,4 | 0,5 | 4 | 1 | 22 | 2001 |
| 15,4 | 19,4 | 0,5 | 3 | 1 | 22 | 2003 |
| 13,3 | 12,5 | 0,5 | 3 | 1 | 22 | 2005 |
| 14,5 | 16,2 | 0,5 | 4 | 1 | 19 | 1999 |
| 14,5 | 16,2 | 0,5 | 4 | 1 | 21 | 2011 |
| 14,5 | 16,2 | 0,5 | 4 | 1 | 23 | 2011 |
| 15,1 | 18,3 | 0,5 | 3 | 1 | 26 | 2003 |
| 15,1 | 18,3 | 0,5 | 3 | 1 | 21 | 2008 |
| 15,5 | 19,8 | 0,5 | 4 | 1 | 19 | 1999 |
| 15,5 | 19,8 | 0,5 | 5 | 1 | 20 | 2010 |
| 15,5 | 19,8 | 0,5 | 5 | 1 | 20 | 2010 |

|      |      |     |   |   |    |      |
|------|------|-----|---|---|----|------|
| 13,4 | 12,8 | 0,5 | 2 | 1 | 22 | 2009 |
| 13,4 | 12,8 | 0,5 | 2 | 1 | 20 | 2013 |
| 12,3 | 9,9  | 0,5 | 2 | 1 | 26 | 2006 |
| 14,9 | 17,6 | 0,5 | 3 | 1 | 20 | 2007 |
| 16   | 21,8 | 0,5 | 6 | 1 | 20 | 2013 |
| 15,8 | 21   | 0,5 | 5 | 1 | 23 | 1999 |
| 15,8 | 21   | 0,5 | 4 | 1 | 18 | 2015 |
| 13,5 | 13,1 | 0,5 | 2 | 1 | 26 | 2006 |
| 16,9 | 25,7 | 0,5 | 5 | 1 | 20 | 2012 |
| 14,4 | 15,9 | 0,5 | 3 | 1 | 19 | 2015 |
| 15,2 | 18,7 | 0,5 | 5 | 1 | 23 | 2011 |
| 13   | 11,7 | 0,5 | 2 | 1 | 26 | 2006 |
| 13   | 11,7 | 0,5 | 2 | 1 | 26 | 2006 |
| 13   | 11,7 | 0,5 | 2 | 1 | 20 | 2013 |
| 13,8 | 14   | 0,5 | 2 | 1 | 19 | 2001 |
| 13,8 | 14   | 0,5 | 2 | 1 | 20 | 2006 |
| 13,8 | 14   | 0,5 | 3 | 1 | 18 | 2015 |
| 16,4 | 23,5 | 0,5 | 4 | 1 | 19 | 2001 |
| 13,7 | 13,7 | 0,5 | 3 | 1 | 21 | 2009 |

|      |      |     |   |   |    |      |
|------|------|-----|---|---|----|------|
| 17,3 | 27,6 | 0,5 | 7 | 1 | 23 | 2001 |
| 14,6 | 16,6 | 0,5 | 3 | 1 | 18 | 2002 |
| 14,6 | 16,6 | 0,5 | 3 | 1 | 20 | 2008 |
| 14,3 | 15,6 | 0,5 | 4 | 1 | 20 | 2004 |
| 16,2 | 22,7 | 0,5 | 5 | 1 | 22 | 2009 |
| 12,8 | 11,2 | 0,5 | 2 | 1 | 22 | 2009 |
| 11,9 | 9    | 0,5 | 2 | 1 | 18 | 2007 |
| 14,2 | 15,3 | 0,5 | 4 | 1 | 21 | 2005 |
| 14,2 | 15,3 | 0,5 | 2 | 1 | 23 | 2006 |
| 14,2 | 15,3 | 0,5 | 4 | 1 | 21 | 2009 |
| 14,2 | 15,3 | 0,5 | 3 | 1 | 19 | 2015 |
| 17,2 | 27,2 | 0,5 | 8 | 1 | 25 | 2004 |
| 14,5 | 16,3 | 0,5 | 5 | 1 | 23 | 2010 |
| 14,5 | 16,3 | 0,5 | 5 | 1 | 23 | 2010 |
| 14,5 | 16,3 | 0,5 | 4 | 1 | 15 | 2015 |
| 16   | 21,9 | 0,5 | 6 | 1 | 20 | 2013 |
| 15,6 | 20,3 | 0,5 | 4 | 1 | 23 | 2009 |
| 15,7 | 20,7 | 0,5 | 5 | 1 | 19 | 2010 |
| 15,7 | 20,7 | 0,5 | 3 | 1 | 23 | 2010 |

|      |      |     |    |   |    |      |
|------|------|-----|----|---|----|------|
| 15,7 | 20,7 | 0,5 | 5  | 1 | 19 | 2010 |
| 15,7 | 20,7 | 0,5 | 3  | 1 | 23 | 2010 |
| 12,6 | 10,7 | 0,5 | 3  | 1 | 22 | 2005 |
| 12,6 | 10,7 | 0,5 | 2  | 1 | 20 | 2013 |
| 15,8 | 21,1 | 0,5 | 4  | 1 | 26 | 2003 |
| 15,8 | 21,1 | 0,5 | 5  | 1 | 19 | 2004 |
| 12,4 | 10,2 | 0,5 | 2  | 1 | 26 | 2006 |
| 14,1 | 15   | 0,5 | 4  | 1 | 24 | 2006 |
| 14,1 | 15   | 0,5 | 3  | 1 | 22 | 2011 |
| 15,2 | 18,8 | 0,5 | 3  | 1 | 18 | 2015 |
| 17,8 | 30,2 | 0,5 | 10 | 1 | 21 | 2010 |
| 17,8 | 30,2 | 0,5 | 10 | 1 | 21 | 2010 |
| 13,3 | 12,6 | 0,5 | 2  | 1 | 20 | 2013 |
| 13,3 | 12,6 | 0,5 | 3  | 1 | 18 | 2015 |
| 16,3 | 23,2 | 0,5 | 7  | 1 | 20 | 2013 |
| 14   | 14,7 | 0,5 | 2  | 1 | 19 | 2000 |
| 14   | 14,7 | 0,5 | 2  | 1 | 15 | 2015 |
| 14   | 14,7 | 0,5 | 3  | 1 | 19 | 2015 |
| 14,4 | 16   | 0,5 | 2  | 1 | 19 | 2001 |

|      |      |     |   |   |    |      |
|------|------|-----|---|---|----|------|
| 15,3 | 19,2 | 0,5 | 3 | 1 | 23 | 2015 |
| 13,4 | 12,9 | 0,5 | 3 | 1 | 19 | 2008 |
| 13,4 | 12,9 | 0,5 | 3 | 1 | 22 | 2011 |
| 16,2 | 22,8 | 0,5 | 4 | 1 | 20 | 2012 |
| 15   | 18,1 | 0,5 | 5 | 1 | 20 | 2010 |
| 15   | 18,1 | 0,5 |   | 1 | 20 | 2010 |
| 15   | 18,1 | 0,5 | 5 | 1 | 20 | 2010 |
| 15   | 18,1 | 0,5 |   | 1 | 20 | 2010 |
| 13,5 | 13,2 | 0,5 | 4 | 1 | 19 | 2009 |
| 13,5 | 13,2 | 0,5 | 5 | 1 | 21 | 2009 |
| 13,5 | 13,2 | 0,5 | 2 | 1 | 20 | 2013 |
| 13,8 | 14,1 | 0,5 | 4 | 1 | 26 | 2006 |
| 15,4 | 19,6 | 0,5 | 3 | 1 | 20 | 2010 |
| 15,4 | 19,6 | 0,5 | 3 | 1 | 20 | 2010 |
| 13,6 | 13,5 | 0,5 | 2 | 1 | 23 | 2006 |
| 13,6 | 13,5 | 0,5 | 4 | 1 | 26 | 2006 |
| 13,7 | 13,8 | 0,5 | 3 | 1 | 21 | 2001 |
| 13,7 | 13,8 | 0,5 | 4 | 1 | 22 | 2009 |
| 13,7 | 13,8 | 0,5 | 3 | 1 | 19 | 2015 |

|      |      |     |   |   |    |      |
|------|------|-----|---|---|----|------|
| 14,8 | 17,4 | 0,5 | 2 | 1 | 19 | 2001 |
| 16,1 | 22,4 | 0,5 | 8 | 1 | 18 | 2015 |
| 14,3 | 15,7 | 0,5 | 4 | 1 | 22 | 2011 |
| 12,7 | 11   | 0,5 | 3 | 1 | 23 | 2010 |
| 12,7 | 11   | 0,5 | 3 | 1 | 23 | 2010 |
| 15,5 | 20   | 0,5 | 4 | 1 | 22 | 2005 |
| 15,5 | 20   | 0,5 | 5 | 1 | 20 | 2010 |
| 15,5 | 20   | 0,5 | 5 | 1 | 20 | 2010 |
| 13   | 11,8 | 0,5 | 2 | 1 | 23 | 2011 |
| 16   | 22   | 0,5 | 6 | 1 | 22 | 2001 |
| 16   | 22   | 0,5 | 3 | 1 | 18 | 2015 |
| 17,6 | 29,3 | 0,5 | 4 | 1 | 20 | 2010 |
| 17,6 | 29,3 | 0,5 | 4 | 1 | 20 | 2010 |
| 15,7 | 20,8 | 0,5 | 3 | 1 | 21 | 2001 |
| 15,8 | 21,2 | 0,5 | 3 | 1 | 19 | 2014 |
| 14,2 | 15,4 | 0,5 | 3 | 1 | 26 | 2005 |
| 14,9 | 17,8 | 0,5 | 3 | 1 | 23 | 2001 |
| 14,9 | 17,8 | 0,5 | 4 | 1 | 18 | 2014 |
| 14,9 | 17,8 | 0,5 | 3 | 1 | 18 | 2015 |

|      |      |     |   |   |    |      |
|------|------|-----|---|---|----|------|
| 15,2 | 18,9 | 0,5 | 5 | 1 | 21 | 2013 |
| 15,2 | 18,9 | 0,5 | 5 | 1 | 17 | 2014 |
| 13,1 | 12,1 | 0,5 | 2 | 1 | 18 | 2008 |
| 13,1 | 12,1 | 0,5 | 2 | 1 | 18 | 2014 |
| 16,2 | 22,9 | 0,5 | 3 | 1 | 20 | 2001 |
| 16,2 | 22,9 | 0,5 | 3 | 1 | 18 | 2015 |
| 16,9 | 26   | 0,5 | 8 | 1 | 20 | 2013 |
| 17,4 | 28,4 | 0,5 | 6 | 1 | 19 | 2013 |
| 13,2 | 12,4 | 0,5 | 2 | 1 | 19 | 2011 |
| 13,2 | 12,4 | 0,5 | 2 | 1 | 17 | 2014 |
| 17,5 | 28,9 | 0,5 | 5 | 1 | 18 | 2012 |
| 15   | 18,2 | 0,5 | 3 | 1 | 20 | 2000 |
| 15   | 18,2 | 0,5 | 5 | 1 | 20 | 2012 |
| 14   | 14,8 | 0,5 | 2 | 1 | 19 | 2013 |
| 15,4 | 19,7 | 0,5 | 4 | 1 | 21 | 2014 |
| 16   | 22,1 | 0,5 | 9 | 1 | 17 | 2009 |
| 15,5 | 20,1 | 0,5 | 6 | 1 | 19 | 2004 |
| 15,5 | 20,1 | 0,5 | 4 | 1 | 22 | 2015 |
| 13,3 | 12,7 | 0,5 | 4 | 1 | 25 | 2004 |

|      |      |     |    |   |    |      |
|------|------|-----|----|---|----|------|
| 14,6 | 16,8 | 0,5 | 4  | 1 | 23 | 2010 |
| 14,6 | 16,8 | 0,5 | 4  | 1 | 23 | 2010 |
| 14,8 | 17,5 | 0,5 | 5  | 1 | 18 | 2007 |
| 14,8 | 17,5 | 0,5 | 5  | 1 | 20 | 2012 |
| 13,9 | 14,5 | 0,5 | 2  | 1 | 19 | 2002 |
| 16,6 | 24,7 | 0,5 | 10 | 1 | 18 | 2015 |
| 15,6 | 20,5 | 0,5 | 6  | 1 | 19 | 2007 |
| 15,8 | 21,3 | 0,5 | 5  | 1 | 21 | 2010 |
| 15,8 | 21,3 | 0,5 | 5  | 1 | 21 | 2010 |
| 15,7 | 20,9 | 0,5 | 4  | 1 | 19 | 2014 |
| 15,1 | 18,6 | 0,5 | 4  | 1 | 26 | 2006 |
| 14,3 | 15,8 | 0,5 | 5  | 1 | 26 | 2006 |
| 16,3 | 23,4 | 0,5 | 4  | 1 | 20 | 2013 |
| 13,5 | 13,3 | 0,5 | 2  | 1 | 23 | 2009 |
| 13,5 | 13,3 | 0,5 | 2  | 1 | 20 | 2013 |
| 16,2 | 23   | 0,5 | 6  | 1 | 23 | 2010 |
| 16,2 | 23   | 0,5 | 6  | 1 | 23 | 2010 |
| 14,9 | 17,9 | 0,5 | 7  | 1 | 23 | 2001 |
| 14,9 | 17,9 | 0,5 | 6  | 1 | 26 | 2003 |

|      |      |     |   |   |    |      |
|------|------|-----|---|---|----|------|
| 14,5 | 16,5 | 0,5 | 3 | 1 | 19 | 2015 |
| 14,2 | 15,5 | 0,5 | 3 | 1 | 18 | 2015 |
| 14,2 | 15,5 | 0,5 | 6 | 1 | 19 | 2015 |
| 14,7 | 17,2 | 0,5 | 4 | 1 | 22 | 2005 |
| 14,7 | 17,2 | 0,5 | 4 | 1 | 19 | 2015 |
| 13   | 11,9 | 0,5 | 3 | 1 | 19 | 2012 |
| 13   | 11,9 | 0,5 | 2 | 1 | 19 | 2014 |
| 15,3 | 19,4 | 0,5 | 4 | 1 | 25 | 2004 |
| 16,4 | 23,9 | 0,5 | 5 | 1 | 19 | 1999 |
| 12,7 | 11,1 | 0,5 | 2 | 1 | 26 | 2009 |
| 12,7 | 11,1 | 0,5 | 2 | 1 | 23 | 2010 |
| 12,7 | 11,1 | 0,5 | 2 | 1 | 23 | 2010 |
| 12,7 | 11,1 | 0,5 | 2 | 1 | 19 | 2013 |
| 12,7 | 11,1 | 0,5 | 2 | 1 | 20 | 2013 |
| 16   | 22,2 | 0,5 | 5 | 1 | 19 | 1999 |
| 16,8 | 25,7 | 0,5 | 6 | 1 | 19 | 2004 |
| 16,8 | 25,7 | 0,5 | 4 | 1 | 21 | 2010 |
| 16,8 | 25,7 | 0,5 | 4 | 1 | 21 | 2010 |
| 16,8 | 25,7 | 0,5 | 4 | 1 | 19 | 2015 |

|      |      |     |   |   |    |      |
|------|------|-----|---|---|----|------|
| 15,4 | 19,8 | 0,5 | 4 | 1 | 15 | 2015 |
| 14,1 | 15,2 | 0,5 | 5 | 1 | 21 | 2005 |
| 14,1 | 15,2 | 0,5 | 4 | 1 | 23 | 2009 |
| 14,1 | 15,2 | 0,5 | 5 | 1 | 23 | 2010 |
| 14,1 | 15,2 | 0,5 | 5 | 1 | 23 | 2010 |
| 14,4 | 16,2 | 0,5 | 5 | 1 | 20 | 2004 |
| 14,4 | 16,2 | 0,5 | 4 | 1 | 20 | 2009 |
| 15,8 | 21,4 | 0,5 | 3 | 1 | 23 | 2001 |
| 15,6 | 20,6 | 0,5 | 3 | 1 | 19 | 2010 |
| 15,6 | 20,6 | 0,5 | 3 | 1 | 19 | 2010 |
| 15,6 | 20,6 | 0,5 | 5 | 1 | 19 | 2014 |
| 13,1 | 12,2 | 0,5 | 2 | 1 | 23 | 2001 |
| 13,1 | 12,2 | 0,5 | 2 | 1 | 19 | 2009 |
| 13,1 | 12,2 | 0,5 | 3 | 1 | 17 | 2014 |
| 13,1 | 12,2 | 0,5 | 2 | 1 | 17 | 2014 |
| 14,8 | 17,6 | 0,5 | 3 | 1 | 20 | 2010 |
| 14,8 | 17,6 | 0,5 | 3 | 1 | 20 | 2010 |
| 14,8 | 17,6 | 0,5 | 4 | 1 | 21 | 2015 |
| 17,6 | 29,6 | 0,5 | 6 | 1 | 21 | 2015 |

|      |      |     |   |   |    |      |
|------|------|-----|---|---|----|------|
| 14   | 14,9 | 0,5 | 4 | 1 | 25 | 2004 |
| 14   | 14,9 | 0,5 | 4 | 1 | 26 | 2006 |
| 14   | 14,9 | 0,5 | 3 | 1 | 20 | 2010 |
| 14   | 14,9 | 0,5 | 3 | 1 | 23 | 2010 |
| 14   | 14,9 | 0,5 | 3 | 1 | 20 | 2010 |
| 14   | 14,9 | 0,5 | 3 | 1 | 23 | 2010 |
| 15,1 | 18,7 | 0,5 | 3 | 1 | 16 | 2008 |
| 15,1 | 18,7 | 0,5 | 7 | 1 | 21 | 2009 |
| 16,5 | 24,4 | 0,5 | 5 | 1 | 18 | 2002 |
| 16,2 | 23,1 | 0,5 | 6 | 1 | 21 | 2005 |
| 16,2 | 23,1 | 0,5 | 3 | 1 | 19 | 2013 |
| 12,8 | 11,4 | 0,5 | 2 | 1 | 20 | 2007 |
| 14,3 | 15,9 | 0,5 | 4 | 1 | 19 | 1999 |
| 14,3 | 15,9 | 0,5 | 5 | 1 | 19 | 2010 |
| 14,3 | 15,9 | 0,5 | 5 | 1 | 19 | 2010 |
| 15,2 | 19,1 | 0,5 | 3 | 1 | 20 | 2001 |
| 15,2 | 19,1 | 0,5 | 4 | 1 | 19 | 2004 |
| 13,8 | 14,3 | 0,5 | 2 | 1 | 19 | 2014 |
| 16,6 | 24,9 | 0,5 | 5 | 1 | 21 | 2015 |

|      |      |     |   |   |    |      |
|------|------|-----|---|---|----|------|
| 16   | 22,3 | 0,5 | 4 | 1 | 19 | 2013 |
| 13,4 | 13,1 | 0,5 | 2 | 1 | 21 | 2009 |
| 15,3 | 19,5 | 0,5 | 3 | 1 | 22 | 2007 |
| 15,3 | 19,5 | 0,5 | 3 | 1 | 18 | 2015 |
| 13,7 | 14   | 0,5 | 4 | 1 | 26 | 2006 |
| 13,7 | 14   | 0,5 | 3 | 1 | 21 | 2010 |
| 13,7 | 14   | 0,5 | 3 | 1 | 21 | 2010 |
| 13,7 | 14   | 0,5 | 2 | 1 | 20 | 2012 |
| 14,5 | 16,6 | 0,5 | 3 | 1 | 19 | 2010 |
| 14,5 | 16,6 | 0,5 | 3 | 1 | 19 | 2010 |
| 14,5 | 16,6 | 0,5 | 4 | 1 | 22 | 2011 |
| 14,7 | 17,3 | 0,5 | 4 | 1 | 23 | 2004 |
| 13,5 | 13,4 | 0,5 | 4 | 1 | 19 | 2015 |
| 13,6 | 13,7 | 0,5 | 2 | 1 | 20 | 2013 |
| 12,9 | 11,7 | 0,5 | 2 | 1 | 19 | 2009 |
| 15,8 | 21,5 | 0,5 | 4 | 1 | 19 | 2011 |
| 15   | 18,4 | 0,5 | 9 | 1 | 20 | 2011 |
| 12,2 | 9,9  | 0,5 | 2 | 1 | 26 | 2006 |
| 15,6 | 20,7 | 0,5 | 6 | 1 | 19 | 2007 |

|      |      |     |   |   |    |      |
|------|------|-----|---|---|----|------|
| 15,6 | 20,7 | 0,5 | 5 | 1 | 20 | 2012 |
| 16,5 | 24,5 | 0,5 | 6 | 1 | 20 | 2011 |
| 18,4 | 34   | 0,5 | 4 | 1 | 18 | 2014 |
| 14,4 | 16,3 | 0,5 | 3 | 1 | 18 | 2015 |
| 14,8 | 17,7 | 0,5 | 4 | 1 | 23 | 2006 |
| 14,8 | 17,7 | 0,5 | 3 | 1 | 22 | 2011 |
| 15,1 | 18,8 | 0,5 | 3 | 1 | 20 | 2003 |
| 15,1 | 18,8 | 0,5 | 5 | 1 | 23 | 2005 |
| 13   | 12   | 0,5 | 5 | 1 | 26 | 2006 |
| 13   | 12   | 0,5 | 7 | 1 | 23 | 2009 |
| 14,6 | 17   | 0,5 | 2 | 1 | 19 | 2002 |
| 14,6 | 17   | 0,5 | 3 | 1 | 25 | 2004 |
| 17,2 | 27,8 | 0,5 | 4 | 1 | 21 | 2010 |
| 17,2 | 27,8 | 0,5 | 4 | 1 | 21 | 2010 |
| 21,3 | 52,8 | 0,5 | 5 | 1 | 18 | 2012 |
| 14   | 15   | 0,5 | 5 | 1 | 21 | 2000 |
| 14   | 15   | 0,5 | 2 | 1 | 19 | 2001 |
| 14   | 15   | 0,5 | 2 | 1 | 24 | 2006 |
| 14   | 15   | 0,5 | 3 | 1 | 18 | 2008 |

|      |      |     |   |   |    |      |
|------|------|-----|---|---|----|------|
| 15,2 | 19,2 | 0,5 | 3 | 1 | 20 | 2010 |
| 15,2 | 19,2 | 0,5 | 3 | 1 | 20 | 2010 |
| 16   | 22,4 | 0,5 | 7 | 1 | 22 | 2009 |
| 14,9 | 18,1 | 0,5 | 3 | 1 | 20 | 2001 |
| 14,9 | 18,1 | 0,5 | 3 | 1 | 21 | 2010 |
| 14,9 | 18,1 | 0,5 | 3 | 1 | 21 | 2010 |
| 15,3 | 19,6 | 0,5 | 5 | 1 | 20 | 2006 |
| 15,9 | 22   | 0,5 | 4 | 1 | 20 | 2006 |
| 15,9 | 22   | 0,5 | 3 | 1 | 15 | 2015 |
| 13,9 | 14,7 | 0,5 | 3 | 1 | 20 | 2008 |
| 15,4 | 20   | 0,5 | 4 | 1 | 21 | 1999 |
| 15,4 | 20   | 0,5 | 3 | 1 | 18 | 2002 |
| 15,4 | 20   | 0,5 | 4 | 1 | 20 | 2013 |
| 15,4 | 20   | 0,5 | 4 | 1 | 16 | 2015 |
| 15,8 | 21,6 | 0,5 | 5 | 1 | 19 | 2012 |
| 14,7 | 17,4 | 0,5 | 4 | 1 | 22 | 2011 |
| 13,2 | 12,6 | 0,5 | 2 | 1 | 20 | 2001 |
| 13,2 | 12,6 | 0,5 | 3 | 1 | 23 | 2007 |
| 13,2 | 12,6 | 0,5 | 3 | 1 | 22 | 2009 |

|      |      |     |   |   |    |      |
|------|------|-----|---|---|----|------|
| 13,2 | 12,6 | 0,5 | 2 | 1 | 20 | 2013 |
| 13,2 | 12,6 | 0,5 | 2 | 1 | 18 | 2014 |
| 16,2 | 23,3 | 0,5 | 7 | 1 | 17 | 2014 |
| 15   | 18,5 | 0,5 | 5 | 1 | 23 | 1999 |
| 14,2 | 15,7 | 0,5 | 5 | 1 | 19 | 2004 |
| 13,3 | 12,9 | 0,5 | 5 | 1 | 20 | 2007 |
| 13,3 | 12,9 | 0,5 | 2 | 1 | 26 | 2009 |
| 13,7 | 14,1 | 0,5 | 2 | 1 | 19 | 2008 |
| 12,8 | 11,5 | 0,5 | 2 | 1 | 17 | 2014 |
| 13,4 | 13,2 | 0,5 | 3 | 1 | 21 | 2009 |
| 13,6 | 13,8 | 0,5 | 3 | 1 | 22 | 2009 |
| 13,5 | 13,5 | 0,5 | 3 | 1 | 21 | 2011 |
| 15,1 | 18,9 | 0,5 | 3 | 1 | 18 | 2002 |
| 14,8 | 17,8 | 0,5 | 4 | 1 | 25 | 2004 |
| 14,8 | 17,8 | 0,5 | 4 | 1 | 21 | 2010 |
| 14,8 | 17,8 | 0,5 | 4 | 1 | 21 | 2010 |
| 14,4 | 16,4 | 0,5 | 4 | 1 | 23 | 1999 |
| 14,4 | 16,4 | 0,5 | 3 | 1 | 19 | 2004 |
| 14,4 | 16,4 | 0,5 | 4 | 1 | 23 | 2006 |

|      |      |     |   |   |    |      |
|------|------|-----|---|---|----|------|
| 14,1 | 15,4 | 0,5 | 3 | 1 | 26 | 2006 |
| 14,1 | 15,4 | 0,5 | 4 | 1 | 26 | 2009 |
| 14,1 | 15,4 | 0,5 | 4 | 1 | 19 | 2015 |
| 14,6 | 17,1 | 0,5 | 5 | 1 | 20 | 2012 |
| 15,2 | 19,3 | 0,5 | 3 | 1 | 20 | 2001 |
| 15,2 | 19,3 | 0,5 | 5 | 1 | 24 | 2006 |
| 16,7 | 25,6 | 0,5 | 7 | 1 | 21 | 2009 |
| 16,5 | 24,7 | 0,5 | 3 | 1 | 20 | 2001 |
| 16,5 | 24,7 | 0,5 | 3 | 1 | 15 | 2015 |
| 12,6 | 11   | 0,5 | 2 | 1 | 20 | 2007 |
| 15,3 | 19,7 | 0,6 | 3 | 1 | 25 | 2003 |
| 15,3 | 19,7 | 0,6 | 5 | 1 | 21 | 2010 |
| 15,3 | 19,7 | 0,6 | 5 | 1 | 21 | 2010 |
| 15,8 | 21,7 | 0,6 | 3 | 1 | 21 | 2000 |
| 15,8 | 21,7 | 0,6 | 9 | 1 | 23 | 2001 |
| 14,9 | 18,2 | 0,6 | 3 | 1 | 17 | 2002 |
| 14   | 15,1 | 0,6 | 2 | 1 | 19 | 2001 |
| 14   | 15,1 | 0,6 | 3 | 1 | 18 | 2008 |
| 14   | 15,1 | 0,6 | 2 | 1 | 19 | 2013 |

|      |      |     |   |   |    |      |
|------|------|-----|---|---|----|------|
| 14   | 15,1 | 0,6 | 3 | 1 | 16 | 2015 |
| 15,4 | 20,1 | 0,6 | 3 | 1 | 17 | 2014 |
| 16,2 | 23,4 | 0,6 | 4 | 1 | 20 | 2012 |
| 16,8 | 26,1 | 0,6 | 5 | 1 | 19 | 2002 |
| 16,8 | 26,1 | 0,6 | 8 | 1 | 22 | 2011 |
| 15,5 | 20,5 | 0,6 | 4 | 1 | 20 | 1999 |
| 15,5 | 20,5 | 0,6 | 4 | 1 | 25 | 2004 |
| 15,5 | 20,5 | 0,6 | 4 | 1 | 19 | 2009 |
| 15,6 | 20,9 | 0,6 | 3 | 1 | 19 | 2001 |
| 15,6 | 20,9 | 0,6 | 4 | 1 | 23 | 2001 |
| 15,6 | 20,9 | 0,6 | 4 | 1 | 20 | 2012 |
| 14,3 | 16,1 | 0,6 | 4 | 1 | 21 | 2011 |
| 12,4 | 10,5 | 0,6 | 2 | 1 | 21 | 2009 |
| 12,4 | 10,5 | 0,6 | 2 | 1 | 22 | 2009 |
| 13   | 12,1 | 0,6 | 2 | 1 | 26 | 2006 |
| 13   | 12,1 | 0,6 | 3 | 1 | 23 | 2008 |
| 13   | 12,1 | 0,6 | 2 | 1 | 19 | 2013 |
| 16,4 | 24,3 | 0,6 | 5 | 1 | 19 | 2005 |
| 16,4 | 24,3 | 0,6 | 5 | 1 | 20 | 2012 |

|      |      |     |   |   |    |      |
|------|------|-----|---|---|----|------|
| 14,7 | 17,5 | 0,6 | 5 | 1 | 19 | 2000 |
| 14,7 | 17,5 | 0,6 | 2 | 1 | 17 | 2002 |
| 14,7 | 17,5 | 0,6 | 3 | 1 | 26 | 2003 |
| 14,5 | 16,8 | 0,6 | 3 | 1 | 23 | 2011 |
| 13,9 | 14,8 | 0,6 | 2 | 1 | 20 | 2013 |
| 15   | 18,6 | 0,6 | 4 | 1 | 19 | 2002 |
| 15   | 18,6 | 0,6 | 4 | 1 | 23 | 2009 |
| 15   | 18,6 | 0,6 | 3 | 1 | 21 | 2010 |
| 15   | 18,6 | 0,6 | 3 | 1 | 21 | 2010 |
| 15   | 18,6 | 0,6 | 4 | 1 | 23 | 2011 |
| 16,1 | 23   | 0,6 | 5 | 1 | 20 | 2012 |
| 18,1 | 32,7 | 0,6 | 4 | 1 | 16 | 2015 |
| 13,1 | 12,4 | 0,6 | 2 | 1 | 20 | 2011 |
| 12,7 | 11,3 | 0,6 | 2 | 1 | 25 | 2008 |
| 12,7 | 11,3 | 0,6 | 2 | 1 | 19 | 2013 |
| 14,2 | 15,8 | 0,6 | 7 | 1 | 26 | 2006 |
| 14,2 | 15,8 | 0,6 | 4 | 1 | 21 | 2011 |
| 14,2 | 15,8 | 0,6 | 3 | 1 | 19 | 2013 |
| 15,1 | 19   | 0,6 | 4 | 1 | 21 | 1999 |

|      |      |     |   |   |    |      |
|------|------|-----|---|---|----|------|
| 15,1 | 19   | 0,6 | 4 | 1 | 19 | 2013 |
| 11,9 | 9,3  | 0,6 | 2 | 1 | 22 | 2007 |
| 17,1 | 27,6 | 0,6 | 5 | 1 | 17 | 2002 |
| 14,8 | 17,9 | 0,6 | 3 | 1 | 16 | 2015 |
| 13,2 | 12,7 | 0,6 | 3 | 1 | 21 | 2011 |
| 13,7 | 14,2 | 0,6 | 4 | 1 | 19 | 2009 |
| 13,7 | 14,2 | 0,6 | 6 | 1 | 21 | 2009 |
| 13,7 | 14,2 | 0,6 | 2 | 1 | 22 | 2009 |
| 13,7 | 14,2 | 0,6 | 3 | 1 | 23 | 2010 |
| 13,7 | 14,2 | 0,6 | 3 | 1 | 23 | 2010 |
| 13,7 | 14,2 | 0,6 | 7 | 1 | 22 | 2011 |
| 13,7 | 14,2 | 0,6 | 3 | 1 | 18 | 2015 |
| 15,9 | 22,2 | 0,6 | 3 | 1 | 21 | 2014 |
| 15,2 | 19,4 | 0,6 | 3 | 1 | 21 | 2001 |
| 15,2 | 19,4 | 0,6 | 5 | 1 | 26 | 2006 |
| 15,2 | 19,4 | 0,6 | 6 | 1 | 20 | 2012 |
| 13,3 | 13   | 0,6 | 2 | 1 | 26 | 2006 |
| 14,4 | 16,5 | 0,6 | 3 | 1 | 23 | 2001 |
| 14,4 | 16,5 | 0,6 | 2 | 1 | 20 | 2010 |

|      |      |     |    |   |    |      |
|------|------|-----|----|---|----|------|
| 14,4 | 16,5 | 0,6 | 2  | 1 | 20 | 2010 |
| 14,6 | 17,2 | 0,6 | 3  | 1 | 19 | 2012 |
| 15,8 | 21,8 | 0,6 | 4  | 1 | 20 | 2001 |
| 16,2 | 23,5 | 0,6 | 4  | 1 | 19 | 2014 |
| 13,5 | 13,6 | 0,6 | 2  | 1 | 20 | 2001 |
| 13,5 | 13,6 | 0,6 | 2  | 1 | 21 | 2014 |
| 13,5 | 13,6 | 0,6 | 2  | 1 | 23 | 2014 |
| 15,3 | 19,8 | 0,6 | 4  | 1 | 21 | 1999 |
| 15,3 | 19,8 | 0,6 | 4  | 1 | 23 | 2009 |
| 14,1 | 15,5 | 0,6 | 4  | 1 | 23 | 2001 |
| 14,1 | 15,5 | 0,6 | 2  | 1 | 19 | 2013 |
| 14,1 | 15,5 | 0,6 | 2  | 1 | 19 | 2014 |
| 15,4 | 20,2 | 0,6 | 3  | 1 | 18 | 2001 |
| 15,6 | 21   | 0,6 | 3  | 1 | 20 | 2013 |
| 16,4 | 24,4 | 0,6 | 4  | 1 | 15 | 2015 |
| 12,1 | 9,8  | 0,6 | 2  | 1 | 18 | 2014 |
| 15,5 | 20,6 | 0,6 | 10 | 1 | 19 | 2013 |
| 14,9 | 18,3 | 0,6 | 4  | 1 | 19 | 1999 |
| 12,3 | 10,3 | 0,6 | 2  | 1 | 21 | 2005 |

|      |      |     |   |   |    |      |
|------|------|-----|---|---|----|------|
| 12,3 | 10,3 | 0,6 | 2 | 1 | 18 | 2007 |
| 14   | 15,2 | 0,6 | 2 | 1 | 21 | 2000 |
| 14   | 15,2 | 0,6 | 3 | 1 | 23 | 2001 |
| 14   | 15,2 | 0,6 | 2 | 1 | 21 | 2005 |
| 14   | 15,2 | 0,6 | 4 | 1 | 26 | 2006 |
| 14   | 15,2 | 0,6 | 2 | 1 | 19 | 2013 |
| 16,7 | 25,8 | 0,6 | 3 | 1 | 18 | 2001 |
| 14,3 | 16,2 | 0,6 | 2 | 1 | 20 | 2001 |
| 14,3 | 16,2 | 0,6 | 3 | 1 | 23 | 2006 |
| 14,3 | 16,2 | 0,6 | 2 | 1 | 20 | 2012 |
| 14,7 | 17,6 | 0,6 | 5 | 1 | 26 | 2006 |
| 15   | 18,7 | 0,6 | 3 | 1 | 20 | 2001 |
| 15   | 18,7 | 0,6 | 4 | 1 | 22 | 2005 |
| 15   | 18,7 | 0,6 | 7 | 1 | 22 | 2009 |
| 15   | 18,7 | 0,6 | 4 | 1 | 19 | 2015 |
| 14,5 | 16,9 | 0,6 | 3 | 1 | 19 | 2014 |
| 15,1 | 19,1 | 0,6 | 5 | 1 | 19 | 2009 |
| 15,9 | 22,3 | 0,6 | 5 | 1 | 19 | 2014 |
| 13,9 | 14,9 | 0,6 | 2 | 1 | 20 | 2001 |

|      |      |     |   |   |    |      |
|------|------|-----|---|---|----|------|
| 13,9 | 14,9 | 0,6 | 3 | 1 | 19 | 2014 |
| 17,8 | 31,3 | 0,6 | 9 | 1 | 19 | 2011 |
| 16,9 | 26,8 | 0,6 | 4 | 1 | 17 | 2014 |
| 14,8 | 18   | 0,6 | 3 | 1 | 20 | 2003 |
| 14,8 | 18   | 0,6 | 3 | 1 | 25 | 2003 |
| 14,8 | 18   | 0,6 | 5 | 1 | 23 | 2007 |
| 14,8 | 18   | 0,6 | 3 | 1 | 15 | 2015 |
| 15,2 | 19,5 | 0,6 | 3 | 1 | 19 | 2010 |
| 15,2 | 19,5 | 0,6 | 3 | 1 | 19 | 2010 |
| 15,2 | 19,5 | 0,6 | 4 | 1 | 20 | 2012 |
| 16,6 | 25,4 | 0,6 | 6 | 1 | 21 | 2003 |
| 13   | 12,2 | 0,6 | 2 | 1 | 21 | 2009 |
| 13   | 12,2 | 0,6 | 3 | 1 | 21 | 2011 |
| 13   | 12,2 | 0,6 | 2 | 1 | 20 | 2013 |
| 14,2 | 15,9 | 0,6 | 4 | 1 | 23 | 2001 |
| 14,2 | 15,9 | 0,6 | 3 | 1 | 20 | 2010 |
| 14,2 | 15,9 | 0,6 | 3 | 1 | 20 | 2010 |
| 13,8 | 14,6 | 0,6 | 2 | 1 | 19 | 1999 |
| 15,3 | 19,9 | 0,6 | 4 | 1 | 20 | 2004 |

|      |      |     |   |   |    |      |
|------|------|-----|---|---|----|------|
| 15,3 | 19,9 | 0,6 | 5 | 1 | 23 | 2010 |
| 15,3 | 19,9 | 0,6 | 5 | 1 | 23 | 2010 |
| 11,1 | 7,6  | 0,6 | 2 | 1 | 19 | 2007 |
| 15,6 | 21,1 | 0,6 | 3 | 1 | 19 | 2000 |
| 15,5 | 20,7 | 0,6 | 9 | 1 | 22 | 2001 |
| 15,5 | 20,7 | 0,6 | 3 | 1 | 22 | 2001 |
| 15,5 | 20,7 | 0,6 | 5 | 1 | 22 | 2005 |
| 15,5 | 20,7 | 0,6 | 3 | 1 | 20 | 2012 |
| 15,5 | 20,7 | 0,6 | 3 | 1 | 17 | 2014 |
| 14,6 | 17,3 | 0,6 | 3 | 1 | 21 | 2014 |
| 16,1 | 23,2 | 0,6 | 3 | 1 | 23 | 2001 |
| 10,2 | 5,9  | 0,6 | 1 | 1 | 21 | 2010 |
| 10,2 | 5,9  | 0,6 | 1 | 1 | 21 | 2010 |
| 17,1 | 27,8 | 0,6 | 7 | 1 | 18 | 2002 |
| 13,1 | 12,5 | 0,6 | 3 | 1 | 20 | 2007 |
| 13,1 | 12,5 | 0,6 | 2 | 1 | 19 | 2013 |
| 13,7 | 14,3 | 0,6 | 3 | 1 | 23 | 2010 |
| 13,7 | 14,3 | 0,6 | 3 | 1 | 23 | 2010 |
| 13,7 | 14,3 | 0,6 | 3 | 1 | 23 | 2011 |

|      |      |     |   |   |    |      |
|------|------|-----|---|---|----|------|
| 12,2 | 10,1 | 0,6 | 2 | 1 | 22 | 2011 |
| 12,2 | 10,1 | 0,6 | 2 | 1 | 23 | 2011 |
| 14,1 | 15,6 | 0,6 | 3 | 1 | 20 | 2009 |
| 16,5 | 25   | 0,6 | 5 | 1 | 18 | 1999 |
| 16,5 | 25   | 0,6 | 5 | 1 | 21 | 2000 |
| 13,2 | 12,8 | 0,6 | 2 | 1 | 22 | 2009 |
| 12,7 | 11,4 | 0,6 | 2 | 1 | 22 | 2001 |
| 13,6 | 14   | 0,6 | 2 | 1 | 19 | 2000 |
| 16   | 22,8 | 0,6 | 6 | 1 | 20 | 2013 |
| 13,3 | 13,1 | 0,6 | 2 | 1 | 26 | 2006 |
| 13,5 | 13,7 | 0,6 | 2 | 1 | 23 | 2010 |
| 13,5 | 13,7 | 0,6 | 2 | 1 | 23 | 2010 |
| 13,4 | 13,4 | 0,6 | 4 | 1 | 21 | 2009 |
| 15   | 18,8 | 0,6 | 4 | 1 | 19 | 1999 |
| 15   | 18,8 | 0,6 | 2 | 1 | 21 | 2003 |
| 15   | 18,8 | 0,6 | 3 | 1 | 26 | 2006 |
| 15   | 18,8 | 0,6 | 3 | 1 | 20 | 2008 |
| 14,7 | 17,7 | 0,6 | 3 | 1 | 22 | 2011 |
| 14,7 | 17,7 | 0,6 | 3 | 1 | 19 | 2015 |

|      |      |     |   |   |    |      |
|------|------|-----|---|---|----|------|
| 17,7 | 30,9 | 0,6 | 7 | 1 | 23 | 2001 |
| 14,3 | 16,3 | 0,6 | 6 | 1 | 19 | 2007 |
| 14,3 | 16,3 | 0,6 | 4 | 1 | 20 | 2009 |
| 14   | 15,3 | 0,6 | 3 | 1 | 18 | 2008 |
| 14,5 | 17   | 0,6 | 4 | 1 | 21 | 2006 |
| 14,5 | 17   | 0,6 | 4 | 1 | 19 | 2009 |
| 14,5 | 17   | 0,6 | 7 | 1 | 22 | 2009 |
| 14,5 | 17   | 0,6 | 3 | 1 | 19 | 2011 |
| 15,1 | 19,2 | 0,6 | 5 | 1 | 19 | 2000 |
| 15,1 | 19,2 | 0,6 | 2 | 1 | 19 | 2013 |
| 17   | 27,4 | 0,6 | 6 | 1 | 19 | 2013 |
| 18,6 | 35,9 | 0,6 | 5 | 1 | 21 | 2010 |
| 18,6 | 35,9 | 0,6 | 5 | 1 | 21 | 2010 |
| 12,8 | 11,7 | 0,6 | 2 | 1 | 20 | 2007 |
| 17,9 | 32   | 0,6 | 4 | 1 | 18 | 2012 |
| 15,2 | 19,6 | 0,6 | 4 | 1 | 20 | 1999 |
| 15,2 | 19,6 | 0,6 | 4 | 1 | 26 | 2001 |
| 15,7 | 21,6 | 0,6 | 4 | 1 | 25 | 2004 |
| 15,7 | 21,6 | 0,6 | 3 | 1 | 23 | 2010 |

|      |      |     |   |   |    |      |
|------|------|-----|---|---|----|------|
| 15,7 | 21,6 | 0,6 | 3 | 1 | 23 | 2010 |
| 16,1 | 23,3 | 0,6 | 4 | 1 | 20 | 2012 |
| 16,1 | 23,3 | 0,6 | 4 | 1 | 20 | 2012 |
| 14,8 | 18,1 | 0,6 | 2 | 1 | 20 | 2001 |
| 14,8 | 18,1 | 0,6 | 4 | 1 | 21 | 2011 |
| 15,3 | 20   | 0,6 | 3 | 1 | 22 | 2001 |
| 15,3 | 20   | 0,6 | 3 | 1 | 23 | 2002 |
| 15,3 | 20   | 0,6 | 3 | 1 | 21 | 2003 |
| 15,3 | 20   | 0,6 | 4 | 1 | 19 | 2013 |
| 13,9 | 15   | 0,6 | 6 | 1 | 18 | 2008 |
| 15,4 | 20,4 | 0,6 | 5 | 1 | 23 | 2004 |
| 15,4 | 20,4 | 0,6 | 5 | 1 | 19 | 2009 |
| 15,5 | 20,8 | 0,6 | 3 | 1 | 18 | 2000 |
| 18,4 | 34,8 | 0,6 | 6 | 1 | 15 | 2015 |
| 14,2 | 16   | 0,6 | 3 | 1 | 19 | 2004 |
| 19,4 | 40,8 | 0,6 | 8 | 1 | 20 | 2013 |
| 12,3 | 10,4 | 0,6 | 3 | 1 | 26 | 2006 |
| 12,9 | 12   | 0,6 | 3 | 1 | 21 | 2005 |
| 16   | 22,9 | 0,6 | 3 | 1 | 24 | 2001 |

|      |      |     |   |   |    |      |
|------|------|-----|---|---|----|------|
| 18,5 | 35,4 | 0,6 | 6 | 1 | 20 | 2013 |
| 14,6 | 17,4 | 0,6 | 3 | 1 | 16 | 2015 |
| 14,6 | 17,4 | 0,6 | 4 | 1 | 19 | 2015 |
| 19,3 | 40,2 | 0,6 | 5 | 1 | 18 | 2014 |
| 14,9 | 18,5 | 0,6 | 4 | 1 | 22 | 2009 |
| 14,4 | 16,7 | 0,6 | 2 | 1 | 21 | 2003 |
| 14,4 | 16,7 | 0,6 | 3 | 1 | 20 | 2013 |
| 15,9 | 22,5 | 0,6 | 4 | 1 | 20 | 2013 |
| 16,2 | 23,8 | 0,6 | 3 | 1 | 20 | 2001 |
| 16,2 | 23,8 | 0,6 | 6 | 1 | 20 | 2010 |
| 16,2 | 23,8 | 0,6 | 6 | 1 | 20 | 2010 |
| 12,6 | 11,2 | 0,6 | 3 | 1 | 26 | 2006 |
| 11,8 | 9,2  | 0,6 | 2 | 1 | 22 | 2007 |
| 11,8 | 9,2  | 0,6 | 2 | 1 | 22 | 2007 |
| 15   | 18,9 | 0,6 | 4 | 1 | 25 | 2004 |
| 15   | 18,9 | 0,6 | 4 | 1 | 26 | 2009 |
| 13,7 | 14,4 | 0,6 | 2 | 1 | 17 | 2002 |
| 13,7 | 14,4 | 0,6 | 2 | 1 | 19 | 2010 |
| 13,7 | 14,4 | 0,6 | 2 | 1 | 19 | 2010 |

|      |      |     |   |   |    |      |
|------|------|-----|---|---|----|------|
| 13,7 | 14,4 | 0,6 | 3 | 1 | 19 | 2015 |
| 10,4 | 6,3  | 0,6 | 1 | 1 | 26 | 2009 |
| 14,1 | 15,7 | 0,6 | 4 | 1 | 19 | 1999 |
| 14,1 | 15,7 | 0,6 | 3 | 1 | 19 | 2002 |
| 14,1 | 15,7 | 0,6 | 3 | 1 | 18 | 2008 |
| 15,8 | 22,1 | 0,6 | 5 | 1 | 20 | 2000 |
| 14,7 | 17,8 | 0,6 | 5 | 1 | 19 | 2002 |
| 14,7 | 17,8 | 0,6 | 5 | 1 | 20 | 2002 |
| 13,1 | 12,6 | 0,6 | 3 | 1 | 25 | 2003 |
| 13,1 | 12,6 | 0,6 | 2 | 1 | 19 | 2006 |
| 13,1 | 12,6 | 0,6 | 5 | 1 | 19 | 2007 |
| 13,1 | 12,6 | 0,6 | 2 | 1 | 22 | 2011 |
| 15,7 | 21,7 | 0,6 | 5 | 1 | 22 | 2001 |
| 15,7 | 21,7 | 0,6 | 5 | 1 | 19 | 2010 |
| 15,7 | 21,7 | 0,6 | 5 | 1 | 21 | 2010 |
| 15,7 | 21,7 | 0,6 | 5 | 1 | 19 | 2010 |
| 15,7 | 21,7 | 0,6 | 5 | 1 | 21 | 2010 |
| 15,7 | 21,7 | 0,6 | 8 | 1 | 22 | 2011 |
| 14,3 | 16,4 | 0,6 | 4 | 1 | 24 | 2009 |

|      |      |     |   |   |    |      |
|------|------|-----|---|---|----|------|
| 14,3 | 16,4 | 0,6 | 3 | 1 | 22 | 2011 |
| 13,2 | 12,9 | 0,6 | 2 | 1 | 21 | 2000 |
| 13,2 | 12,9 | 0,6 | 2 | 1 | 23 | 2010 |
| 13,2 | 12,9 | 0,6 | 2 | 1 | 23 | 2010 |
| 15,2 | 19,7 | 0,6 | 3 | 1 | 19 | 2008 |
| 13,3 | 13,2 | 0,6 | 4 | 1 | 23 | 2006 |
| 13,3 | 13,2 | 0,6 | 2 | 1 | 20 | 2013 |
| 13,4 | 13,5 | 0,6 | 5 | 1 | 21 | 2011 |
| 15,3 | 20,1 | 0,6 | 4 | 1 | 19 | 1999 |
| 14   | 15,4 | 0,6 | 3 | 1 | 26 | 2003 |
| 14   | 15,4 | 0,6 | 3 | 1 | 26 | 2003 |
| 14   | 15,4 | 0,6 | 4 | 1 | 24 | 2006 |
| 14   | 15,4 | 0,6 | 3 | 1 | 18 | 2008 |
| 15,5 | 20,9 | 0,6 | 5 | 1 | 20 | 1999 |
| 15,5 | 20,9 | 0,6 | 5 | 1 | 21 | 2010 |
| 15,5 | 20,9 | 0,6 | 5 | 1 | 21 | 2010 |
| 17,6 | 30,6 | 0,6 | 4 | 1 | 19 | 2013 |
| 15,4 | 20,5 | 0,6 | 4 | 1 | 24 | 2009 |
| 12   | 9,7  | 0,6 | 4 | 1 | 21 | 2009 |

|      |      |     |   |   |    |      |
|------|------|-----|---|---|----|------|
| 14,8 | 18,2 | 0,6 | 3 | 1 | 18 | 2002 |
| 16   | 23   | 0,6 | 4 | 1 | 22 | 2004 |
| 17,5 | 30,1 | 0,6 | 4 | 1 | 19 | 2015 |
| 12,2 | 10,2 | 0,6 | 2 | 1 | 20 | 2004 |
| 12,2 | 10,2 | 0,6 | 2 | 1 | 18 | 2007 |
| 12,2 | 10,2 | 0,6 | 2 | 1 | 22 | 2011 |
| 12,2 | 10,2 | 0,6 | 2 | 1 | 20 | 2012 |
| 17   | 27,6 | 0,6 | 3 | 1 | 19 | 2010 |
| 17   | 27,6 | 0,6 | 3 | 1 | 19 | 2010 |
| 11,7 | 9    | 0,6 | 2 | 1 | 20 | 2004 |
| 17,3 | 29,1 | 0,6 | 8 | 1 | 20 | 2013 |
| 15,9 | 22,6 | 0,6 | 4 | 1 | 19 | 2014 |
| 16,4 | 24,8 | 0,6 | 4 | 1 | 20 | 2001 |
| 16,4 | 24,8 | 0,6 | 3 | 1 | 15 | 2015 |
| 13,9 | 15,1 | 0,6 | 2 | 1 | 21 | 2000 |
| 14,9 | 18,6 | 0,6 | 5 | 1 | 17 | 2009 |
| 14,6 | 17,5 | 0,6 | 3 | 1 | 22 | 2003 |
| 14,6 | 17,5 | 0,6 | 4 | 1 | 23 | 2006 |
| 14,6 | 17,5 | 0,6 | 6 | 1 | 19 | 2007 |

|      |      |     |   |   |    |      |
|------|------|-----|---|---|----|------|
| 14,6 | 17,5 | 0,6 | 4 | 1 | 20 | 2009 |
| 14,6 | 17,5 | 0,6 | 3 | 1 | 19 | 2011 |
| 14,4 | 16,8 | 0,6 | 3 | 1 | 23 | 2005 |
| 12,8 | 11,8 | 0,6 | 2 | 1 | 21 | 2006 |
| 15,8 | 22,2 | 0,6 | 9 | 1 | 21 | 2010 |
| 15,8 | 22,2 | 0,6 | 9 | 1 | 21 | 2010 |
| 15,8 | 22,2 | 0,6 | 6 | 1 | 20 | 2013 |
| 15   | 19   | 0,6 | 7 | 1 | 19 | 2004 |
| 15   | 19   | 0,6 | 5 | 1 | 18 | 2007 |
| 15   | 19   | 0,6 | 3 | 1 | 20 | 2012 |
| 16,1 | 23,5 | 0,6 | 6 | 1 | 25 | 2003 |
| 13,8 | 14,8 | 0,6 | 7 | 1 | 21 | 2010 |
| 13,8 | 14,8 | 0,6 | 7 | 1 | 21 | 2010 |
| 13,8 | 14,8 | 0,6 | 2 | 1 | 17 | 2014 |
| 16,5 | 25,3 | 0,6 | 6 | 1 | 23 | 2001 |
| 15,7 | 21,8 | 0,6 | 4 | 1 | 18 | 2000 |
| 19,3 | 40,5 | 0,6 | 8 | 1 | 18 | 2012 |
| 15,1 | 19,4 | 0,6 | 4 | 1 | 19 | 1999 |
| 15,1 | 19,4 | 0,6 | 3 | 1 | 23 | 2001 |

|      |      |     |    |   |    |      |
|------|------|-----|----|---|----|------|
| 15,1 | 19,4 | 0,6 | 3  | 1 | 17 | 2014 |
| 14,7 | 17,9 | 0,6 | 3  | 1 | 23 | 2010 |
| 14,7 | 17,9 | 0,6 | 3  | 1 | 23 | 2010 |
| 14,7 | 17,9 | 0,6 | 3  | 1 | 20 | 2013 |
| 14,7 | 17,9 | 0,6 | 4  | 1 | 21 | 2014 |
| 14,1 | 15,8 | 0,6 | 2  | 1 | 23 | 2003 |
| 12,9 | 12,1 | 0,6 | 2  | 1 | 19 | 2006 |
| 12,9 | 12,1 | 0,6 | 2  | 1 | 19 | 2013 |
| 15,6 | 21,4 | 0,6 | 6  | 1 | 19 | 2000 |
| 15,6 | 21,4 | 0,6 | 4  | 1 | 19 | 2004 |
| 17,4 | 29,7 | 0,6 | 4  | 1 | 18 | 2000 |
| 17,4 | 29,7 | 0,6 | 10 | 1 | 19 | 2011 |
| 15,2 | 19,8 | 0,6 | 4  | 1 | 25 | 2004 |
| 15,2 | 19,8 | 0,6 | 4  | 1 | 20 | 2010 |
| 15,2 | 19,8 | 0,6 | 4  | 1 | 20 | 2010 |
| 13,7 | 14,5 | 0,6 | 3  | 1 | 20 | 2010 |
| 13,7 | 14,5 | 0,6 | 3  | 1 | 20 | 2010 |
| 13,7 | 14,5 | 0,6 | 3  | 1 | 19 | 2015 |
| 15,5 | 21   | 0,6 | 6  | 1 | 21 | 2015 |

|      |      |     |    |   |    |      |
|------|------|-----|----|---|----|------|
| 16   | 23,1 | 0,6 | 3  | 1 | 26 | 2003 |
| 15,3 | 20,2 | 0,6 | 3  | 1 | 26 | 2003 |
| 15,3 | 20,2 | 0,6 | 5  | 1 | 25 | 2004 |
| 15,4 | 20,6 | 0,6 | 3  | 1 | 25 | 2003 |
| 18   | 32,9 | 0,6 | 10 | 1 | 23 | 2015 |
| 14,5 | 17,2 | 0,6 | 3  | 1 | 19 | 2000 |
| 14,5 | 17,2 | 0,6 | 5  | 1 | 22 | 2007 |
| 14,3 | 16,5 | 0,6 | 6  | 1 | 22 | 2004 |
| 14,3 | 16,5 | 0,6 | 2  | 1 | 21 | 2014 |
| 13   | 12,4 | 0,6 | 2  | 1 | 23 | 2006 |
| 13   | 12,4 | 0,6 | 2  | 1 | 22 | 2009 |
| 14,8 | 18,3 | 0,6 | 6  | 1 | 19 | 2008 |
| 16,2 | 24   | 0,6 | 6  | 1 | 19 | 2010 |
| 16,2 | 24   | 0,6 | 6  | 1 | 19 | 2010 |
| 13,6 | 14,2 | 0,6 | 3  | 1 | 23 | 2001 |
| 15,9 | 22,7 | 0,6 | 5  | 1 | 19 | 2008 |
| 14   | 15,5 | 0,6 | 3  | 1 | 25 | 2004 |
| 14   | 15,5 | 0,6 | 3  | 1 | 20 | 2010 |
| 14   | 15,5 | 0,6 | 3  | 1 | 20 | 2010 |

|      |      |     |   |   |    |      |
|------|------|-----|---|---|----|------|
| 14   | 15,5 | 0,6 | 3 | 1 | 23 | 2011 |
| 14   | 15,5 | 0,6 | 2 | 1 | 19 | 2013 |
| 12,6 | 11,3 | 0,6 | 2 | 1 | 26 | 2006 |
| 13,1 | 12,7 | 0,6 | 2 | 1 | 26 | 2003 |
| 13,1 | 12,7 | 0,6 | 4 | 1 | 21 | 2015 |
| 17,6 | 30,8 | 0,6 | 6 | 1 | 20 | 2001 |
| 13,5 | 13,9 | 0,6 | 2 | 1 | 18 | 2002 |
| 13,5 | 13,9 | 0,6 | 2 | 1 | 26 | 2003 |
| 13,5 | 13,9 | 0,6 | 2 | 1 | 22 | 2009 |
| 13,5 | 13,9 | 0,6 | 4 | 1 | 19 | 2015 |
| 19,7 | 43,2 | 0,6 | 6 | 1 | 19 | 2013 |
| 16,8 | 26,8 | 0,6 | 4 | 1 | 20 | 2001 |
| 13,2 | 13   | 0,6 | 3 | 1 | 22 | 2005 |
| 13,2 | 13   | 0,6 | 2 | 1 | 26 | 2006 |
| 13,4 | 13,6 | 0,6 | 2 | 1 | 25 | 2002 |
| 13,4 | 13,6 | 0,6 | 2 | 1 | 23 | 2002 |
| 13,4 | 13,6 | 0,6 | 3 | 1 | 20 | 2011 |
| 14,9 | 18,7 | 0,6 | 5 | 1 | 26 | 2006 |
| 13,3 | 13,3 | 0,6 | 3 | 1 | 23 | 2010 |

|      |      |     |   |   |    |      |
|------|------|-----|---|---|----|------|
| 13,3 | 13,3 | 0,6 | 3 | 1 | 23 | 2010 |
| 13,3 | 13,3 | 0,6 | 4 | 1 | 21 | 2011 |
| 15,8 | 22,3 | 0,6 | 5 | 1 | 21 | 2010 |
| 15,8 | 22,3 | 0,6 | 5 | 1 | 21 | 2010 |
| 16,1 | 23,6 | 0,6 | 4 | 1 | 19 | 2013 |
| 14,6 | 17,6 | 0,6 | 3 | 1 | 26 | 2006 |
| 14,6 | 17,6 | 0,6 | 3 | 1 | 20 | 2008 |
| 14,6 | 17,6 | 0,6 | 3 | 1 | 21 | 2014 |
| 16,3 | 24,5 | 0,6 | 4 | 1 | 21 | 2000 |
| 14,2 | 16,2 | 0,6 | 3 | 1 | 23 | 2004 |
| 14,2 | 16,2 | 0,6 | 3 | 1 | 19 | 2008 |
| 14,2 | 16,2 | 0,6 | 6 | 1 | 22 | 2011 |
| 18   | 33   | 0,6 | 7 | 1 | 19 | 2014 |
| 15   | 19,1 | 0,6 | 4 | 1 | 25 | 2004 |
| 15   | 19,1 | 0,6 | 3 | 1 | 19 | 2014 |
| 13,9 | 15,2 | 0,6 | 2 | 1 | 20 | 2013 |
| 13,9 | 15,2 | 0,6 | 2 | 1 | 18 | 2014 |
| 13,9 | 15,2 | 0,6 | 3 | 1 | 19 | 2014 |
| 14,4 | 16,9 | 0,6 | 2 | 1 | 22 | 2001 |

|      |      |     |   |   |    |      |
|------|------|-----|---|---|----|------|
| 14,4 | 16,9 | 0,6 | 3 | 1 | 26 | 2003 |
| 15,6 | 21,5 | 0,6 | 5 | 1 | 19 | 2000 |
| 15,6 | 21,5 | 0,6 | 4 | 1 | 26 | 2003 |
| 15,6 | 21,5 | 0,6 | 5 | 1 | 17 | 2014 |
| 15,1 | 19,5 | 0,6 | 3 | 1 | 19 | 2005 |
| 15,1 | 19,5 | 0,6 | 4 | 1 | 17 | 2009 |
| 15,1 | 19,5 | 0,6 | 7 | 1 | 19 | 2012 |
| 15,1 | 19,5 | 0,6 | 3 | 1 | 19 | 2013 |
| 15,1 | 19,5 | 0,6 | 3 | 1 | 18 | 2014 |
| 15,1 | 19,5 | 0,6 | 3 | 1 | 15 | 2015 |
| 16   | 23,2 | 0,6 | 6 | 1 | 26 | 2003 |
| 14,7 | 18   | 0,6 | 5 | 1 | 19 | 2000 |
| 14,7 | 18   | 0,6 | 5 | 1 | 22 | 2005 |
| 15,2 | 19,9 | 0,6 | 3 | 1 | 17 | 2002 |
| 15,2 | 19,9 | 0,6 | 4 | 1 | 21 | 2005 |
| 15,2 | 19,9 | 0,6 | 3 | 1 | 18 | 2008 |
| 15,2 | 19,9 | 0,6 | 4 | 1 | 20 | 2008 |
| 15,3 | 20,3 | 0,6 | 3 | 1 | 17 | 2002 |
| 15,3 | 20,3 | 0,6 | 6 | 1 | 26 | 2006 |

|      |      |     |   |   |    |      |
|------|------|-----|---|---|----|------|
| 16,7 | 26,4 | 0,6 | 4 | 1 | 21 | 2001 |
| 13,8 | 14,9 | 0,6 | 2 | 1 | 19 | 2008 |
| 13,8 | 14,9 | 0,6 | 2 | 1 | 20 | 2013 |
| 12   | 9,8  | 0,6 | 2 | 1 | 22 | 2007 |
| 12   | 9,8  | 0,6 | 2 | 1 | 22 | 2007 |
| 12   | 9,8  | 0,6 | 2 | 1 | 21 | 2011 |
| 14,1 | 15,9 | 0,6 | 2 | 1 | 20 | 2006 |
| 14,1 | 15,9 | 0,6 | 4 | 1 | 23 | 2006 |
| 14,1 | 15,9 | 0,6 | 2 | 1 | 24 | 2006 |
| 14,1 | 15,9 | 0,6 | 4 | 1 | 19 | 2008 |
| 15,9 | 22,8 | 0,6 | 7 | 1 | 20 | 2012 |
| 12,2 | 10,3 | 0,6 | 2 | 1 | 20 | 2007 |
| 14,5 | 17,3 | 0,6 | 7 | 1 | 23 | 2009 |
| 14,5 | 17,3 | 0,6 | 6 | 1 | 19 | 2012 |
| 14,8 | 18,4 | 0,6 | 4 | 1 | 16 | 2015 |
| 14,8 | 18,4 | 0,6 | 4 | 1 | 21 | 2015 |
| 14,3 | 16,6 | 0,6 | 3 | 1 | 23 | 2007 |
| 13,7 | 14,6 | 0,6 | 3 | 1 | 21 | 2010 |
| 13,7 | 14,6 | 0,6 | 3 | 1 | 21 | 2010 |

|      |      |     |   |   |    |      |
|------|------|-----|---|---|----|------|
| 17   | 27,9 | 0,6 | 7 | 1 | 19 | 2014 |
| 16,1 | 23,7 | 0,6 | 4 | 1 | 21 | 2000 |
| 16,1 | 23,7 | 0,6 | 6 | 1 | 23 | 2015 |
| 16,3 | 24,6 | 0,6 | 5 | 1 | 19 | 2002 |
| 12,9 | 12,2 | 0,6 | 2 | 1 | 26 | 2009 |
| 12,9 | 12,2 | 0,6 | 2 | 1 | 19 | 2013 |
| 12,5 | 11,1 | 0,6 | 2 | 1 | 20 | 2010 |
| 12,5 | 11,1 | 0,6 | 2 | 1 | 23 | 2010 |
| 12,5 | 11,1 | 0,6 | 2 | 1 | 20 | 2010 |
| 12,5 | 11,1 | 0,6 | 2 | 1 | 23 | 2010 |
| 12,5 | 11,1 | 0,6 | 2 | 1 | 21 | 2015 |
| 14,9 | 18,8 | 0,6 | 3 | 1 | 20 | 2001 |
| 14,9 | 18,8 | 0,6 | 4 | 1 | 20 | 2007 |
| 13,6 | 14,3 | 0,6 | 2 | 1 | 19 | 2013 |
| 15,7 | 22   | 0,6 | 3 | 1 | 18 | 2002 |
| 15,7 | 22   | 0,6 | 3 | 1 | 21 | 2010 |
| 15,7 | 22   | 0,6 | 3 | 1 | 21 | 2010 |
| 15,7 | 22   | 0,6 | 4 | 1 | 16 | 2015 |
| 14   | 15,6 | 0,6 | 5 | 1 | 21 | 2006 |

|      |      |     |   |   |    |      |
|------|------|-----|---|---|----|------|
| 14,6 | 17,7 | 0,6 | 8 | 1 | 26 | 2006 |
| 16   | 23,3 | 0,6 | 5 | 1 | 21 | 1999 |
| 16   | 23,3 | 0,6 | 5 | 1 | 20 | 2001 |
| 16   | 23,3 | 0,6 | 4 | 1 | 18 | 2015 |
| 18,7 | 37,2 | 0,6 | 5 | 1 | 20 | 2013 |
| 15   | 19,2 | 0,6 | 4 | 1 | 20 | 2004 |
| 15   | 19,2 | 0,6 | 4 | 1 | 20 | 2011 |
| 20,4 | 48,3 | 0,6 | 8 | 1 | 19 | 2013 |
| 15,6 | 21,6 | 0,6 | 4 | 1 | 20 | 1999 |
| 13   | 12,5 | 0,6 | 3 | 1 | 22 | 2005 |
| 13   | 12,5 | 0,6 | 2 | 1 | 26 | 2009 |
| 13   | 12,5 | 0,6 | 2 | 1 | 21 | 2010 |
| 13   | 12,5 | 0,6 | 2 | 1 | 23 | 2010 |
| 13   | 12,5 | 0,6 | 2 | 1 | 21 | 2010 |
| 13   | 12,5 | 0,6 | 2 | 1 | 23 | 2010 |
| 15,6 | 21,6 | 0,6 | 3 | 1 | 19 | 2013 |
| 13,5 | 14   | 0,6 | 3 | 1 | 23 | 1999 |
| 13,5 | 14   | 0,6 | 3 | 1 | 22 | 2005 |
| 13,5 | 14   | 0,6 | 4 | 1 | 23 | 2009 |

|      |      |     |   |   |    |      |
|------|------|-----|---|---|----|------|
| 13,5 | 14   | 0,6 | 3 | 1 | 23 | 2010 |
| 13,5 | 14   | 0,6 | 3 | 1 | 23 | 2010 |
| 13,5 | 14   | 0,6 | 3 | 1 | 23 | 2010 |
| 13,5 | 14   | 0,6 | 3 | 1 | 23 | 2010 |
| 16,4 | 25,1 | 0,6 | 4 | 1 | 18 | 2014 |
| 14,2 | 16,3 | 0,6 | 3 | 1 | 26 | 2003 |
| 15,1 | 19,6 | 0,6 | 5 | 1 | 20 | 2009 |
| 15,1 | 19,6 | 0,6 | 3 | 1 | 15 | 2015 |
| 15,5 | 21,2 | 0,6 | 4 | 1 | 19 | 2001 |
| 15,5 | 21,2 | 0,6 | 4 | 1 | 18 | 2015 |
| 14,4 | 17   | 0,6 | 4 | 1 | 26 | 2006 |
| 14,4 | 17   | 0,6 | 6 | 1 | 23 | 2010 |
| 14,4 | 17   | 0,6 | 6 | 1 | 23 | 2010 |
| 13,1 | 12,8 | 0,6 | 3 | 1 | 21 | 2005 |
| 13,4 | 13,7 | 0,6 | 2 | 1 | 21 | 2009 |
| 13,4 | 13,7 | 0,6 | 3 | 1 | 20 | 2011 |
| 13,4 | 13,7 | 0,6 | 2 | 1 | 23 | 2011 |
| 15,2 | 20   | 0,6 | 5 | 1 | 19 | 1999 |
| 15,2 | 20   | 0,6 | 5 | 1 | 21 | 2000 |

|      |      |     |   |   |    |      |
|------|------|-----|---|---|----|------|
| 15,2 | 20   | 0,6 | 3 | 1 | 22 | 2001 |
| 15,2 | 20   | 0,6 | 3 | 1 | 25 | 2003 |
| 15,2 | 20   | 0,6 | 3 | 1 | 19 | 2014 |
| 15,4 | 20,8 | 0,6 | 5 | 1 | 22 | 2003 |
| 13,2 | 13,1 | 0,6 | 3 | 1 | 19 | 2007 |
| 13,2 | 13,1 | 0,6 | 5 | 1 | 22 | 2007 |
| 13,2 | 13,1 | 0,6 | 2 | 1 | 22 | 2009 |
| 13,2 | 13,1 | 0,6 | 2 | 1 | 20 | 2013 |
| 13,3 | 13,4 | 0,6 | 2 | 1 | 21 | 2006 |
| 13,3 | 13,4 | 0,6 | 3 | 1 | 21 | 2008 |
| 12,3 | 10,6 | 0,6 | 3 | 1 | 22 | 2005 |
| 12,3 | 10,6 | 0,6 | 2 | 1 | 23 | 2010 |
| 12,3 | 10,6 | 0,6 | 2 | 1 | 23 | 2010 |
| 12,3 | 10,6 | 0,6 | 2 | 1 | 21 | 2011 |
| 11,9 | 9,6  | 0,6 | 2 | 1 | 21 | 2005 |
| 11,9 | 9,6  | 0,6 | 2 | 1 | 19 | 2006 |
| 15,9 | 22,9 | 0,6 | 4 | 1 | 19 | 2012 |
| 13,9 | 15,3 | 0,6 | 3 | 1 | 20 | 2001 |
| 16,9 | 27,5 | 0,6 | 5 | 1 | 18 | 2004 |

|      |      |     |   |   |    |      |
|------|------|-----|---|---|----|------|
| 16,9 | 27,5 | 0,6 | 7 | 1 | 17 | 2009 |
| 16,9 | 27,5 | 0,6 | 7 | 1 | 18 | 2012 |
| 14,7 | 18,1 | 0,6 | 5 | 1 | 20 | 1999 |
| 14,7 | 18,1 | 0,6 | 2 | 1 | 20 | 2000 |
| 16,5 | 25,6 | 0,6 | 5 | 1 | 21 | 1999 |
| 11,6 | 8,9  | 0,6 | 2 | 1 | 18 | 2007 |
| 16,1 | 23,8 | 0,6 | 6 | 1 | 21 | 2001 |
| 11,1 | 7,8  | 0,6 | 1 | 1 | 20 | 2007 |
| 14,8 | 18,5 | 0,6 | 3 | 1 | 18 | 2000 |
| 14,8 | 18,5 | 0,6 | 3 | 1 | 19 | 2010 |
| 14,8 | 18,5 | 0,6 | 3 | 1 | 19 | 2010 |
| 14,5 | 17,4 | 0,6 | 3 | 1 | 21 | 2003 |
| 14,5 | 17,4 | 0,6 | 3 | 1 | 19 | 2009 |
| 13,8 | 15   | 0,6 | 5 | 1 | 26 | 2006 |
| 13,8 | 15   | 0,6 | 3 | 1 | 19 | 2008 |
| 13,8 | 15   | 0,6 | 3 | 1 | 23 | 2010 |
| 13,8 | 15   | 0,6 | 3 | 1 | 23 | 2010 |
| 14,1 | 16   | 0,6 | 2 | 1 | 18 | 2002 |
| 14,1 | 16   | 0,6 | 3 | 1 | 20 | 2006 |

|      |      |     |   |   |    |      |
|------|------|-----|---|---|----|------|
| 14,3 | 16,7 | 0,6 | 3 | 1 | 20 | 2002 |
| 14,3 | 16,7 | 0,6 | 3 | 1 | 20 | 2012 |
| 16,7 | 26,6 | 0,6 | 6 | 1 | 21 | 2003 |
| 16,7 | 26,6 | 0,6 | 6 | 1 | 22 | 2011 |
| 12,7 | 11,7 | 0,6 | 2 | 1 | 20 | 2013 |
| 12,7 | 11,7 | 0,6 | 2 | 1 | 18 | 2014 |
| 16   | 23,4 | 0,6 | 4 | 1 | 17 | 2002 |
| 18,4 | 35,6 | 0,6 | 7 | 1 | 19 | 2012 |
| 13,7 | 14,7 | 0,6 | 3 | 1 | 22 | 2004 |
| 13,7 | 14,7 | 0,6 | 2 | 1 | 21 | 2006 |
| 13,7 | 14,7 | 0,6 | 2 | 1 | 21 | 2010 |
| 13,7 | 14,7 | 0,6 | 3 | 1 | 23 | 2010 |
| 13,7 | 14,7 | 0,6 | 2 | 1 | 21 | 2010 |
| 13,7 | 14,7 | 0,6 | 3 | 1 | 23 | 2010 |
| 13,7 | 14,7 | 0,6 | 2 | 1 | 20 | 2013 |
| 15   | 19,3 | 0,6 | 3 | 1 | 22 | 2001 |
| 15   | 19,3 | 0,6 | 3 | 1 | 20 | 2006 |
| 15   | 19,3 | 0,6 | 3 | 1 | 19 | 2013 |
| 15   | 19,3 | 0,6 | 3 | 1 | 21 | 2015 |

|      |      |     |   |   |    |      |
|------|------|-----|---|---|----|------|
| 17,2 | 29,1 | 0,6 | 6 | 1 | 21 | 2001 |
| 14,6 | 17,8 | 0,6 | 5 | 1 | 19 | 1999 |
| 14,6 | 17,8 | 0,6 | 4 | 1 | 22 | 2011 |
| 14,6 | 17,8 | 0,6 | 3 | 1 | 20 | 2013 |
| 14,6 | 17,8 | 0,6 | 3 | 1 | 18 | 2014 |
| 15,5 | 21,3 | 0,6 | 4 | 1 | 21 | 2000 |
| 11,8 | 9,4  | 0,6 | 2 | 1 | 26 | 2006 |
| 14   | 15,7 | 0,6 | 3 | 1 | 25 | 2003 |
| 14   | 15,7 | 0,6 | 3 | 1 | 25 | 2004 |
| 14   | 15,7 | 0,6 | 4 | 1 | 23 | 2009 |
| 14   | 15,7 | 0,6 | 3 | 1 | 22 | 2011 |
| 14   | 15,7 | 0,6 | 5 | 1 | 20 | 2013 |
| 15,1 | 19,7 | 0,6 | 3 | 1 | 26 | 2003 |
| 15,1 | 19,7 | 0,6 | 4 | 1 | 20 | 2013 |
| 12,8 | 12   | 0,6 | 4 | 1 | 23 | 2004 |
| 12,8 | 12   | 0,6 | 2 | 1 | 26 | 2006 |
| 15,4 | 20,9 | 0,6 | 4 | 1 | 23 | 2001 |
| 15,4 | 20,9 | 0,6 | 3 | 1 | 18 | 2014 |
| 15,4 | 20,9 | 0,6 | 4 | 1 | 18 | 2015 |

|      |      |     |   |   |    |      |
|------|------|-----|---|---|----|------|
| 15,2 | 20,1 | 0,6 | 4 | 1 | 15 | 2015 |
| 15,3 | 20,5 | 0,6 | 4 | 1 | 18 | 2001 |
| 15,3 | 20,5 | 0,6 | 4 | 1 | 18 | 2001 |
| 15,3 | 20,5 | 0,6 | 5 | 1 | 26 | 2001 |
| 15,3 | 20,5 | 0,6 | 4 | 1 | 25 | 2004 |
| 13,6 | 14,4 | 0,6 | 2 | 1 | 21 | 2009 |
| 13,6 | 14,4 | 0,6 | 2 | 1 | 21 | 2010 |
| 13,6 | 14,4 | 0,6 | 2 | 1 | 21 | 2010 |
| 14,4 | 17,1 | 0,6 | 3 | 1 | 20 | 2011 |
| 16,1 | 23,9 | 0,6 | 6 | 1 | 21 | 2005 |
| 16,1 | 23,9 | 0,6 | 8 | 1 | 23 | 2005 |
| 14,2 | 16,4 | 0,6 | 3 | 1 | 18 | 2008 |
| 14,2 | 16,4 | 0,6 | 2 | 1 | 21 | 2015 |
| 12   | 9,9  | 0,6 | 2 | 1 | 18 | 2007 |
| 12   | 9,9  | 0,6 | 2 | 1 | 19 | 2009 |
| 14,7 | 18,2 | 0,6 | 4 | 1 | 20 | 2006 |
| 14,7 | 18,2 | 0,6 | 3 | 1 | 19 | 2010 |
| 14,7 | 18,2 | 0,6 | 3 | 1 | 19 | 2010 |
| 12,9 | 12,3 | 0,6 | 2 | 1 | 21 | 2005 |

|      |      |     |   |   |    |      |
|------|------|-----|---|---|----|------|
| 13,5 | 14,1 | 0,6 | 2 | 1 | 22 | 2009 |
| 13,5 | 14,1 | 0,6 | 4 | 1 | 24 | 2009 |
| 13,5 | 14,1 | 0,6 | 2 | 1 | 20 | 2012 |
| 17,4 | 30,2 | 0,6 | 9 | 1 | 22 | 2004 |
| 18,1 | 34   | 0,6 | 7 | 1 | 19 | 2012 |
| 13   | 12,6 | 0,6 | 3 | 1 | 25 | 2005 |
| 13   | 12,6 | 0,6 | 2 | 1 | 19 | 2009 |
| 13   | 12,6 | 0,6 | 2 | 1 | 22 | 2009 |
| 13   | 12,6 | 0,6 | 2 | 1 | 23 | 2009 |
| 13   | 12,6 | 0,6 | 2 | 1 | 26 | 2009 |
| 13   | 12,6 | 0,6 | 2 | 1 | 19 | 2013 |
| 13   | 12,6 | 0,6 | 2 | 1 | 20 | 2013 |
| 13   | 12,6 | 0,6 | 2 | 1 | 23 | 2015 |
| 13,4 | 13,8 | 0,6 | 2 | 1 | 18 | 2014 |
| 16   | 23,5 | 0,6 | 4 | 1 | 20 | 2001 |
| 16   | 23,5 | 0,6 | 3 | 1 | 20 | 2003 |
| 14,8 | 18,6 | 0,6 | 4 | 1 | 23 | 2007 |
| 14,8 | 18,6 | 0,6 | 4 | 1 | 19 | 2012 |
| 13,3 | 13,5 | 0,6 | 3 | 1 | 25 | 2003 |

|      |      |     |   |   |    |      |
|------|------|-----|---|---|----|------|
| 13,3 | 13,5 | 0,6 | 2 | 1 | 25 | 2003 |
| 13,3 | 13,5 | 0,6 | 3 | 1 | 25 | 2003 |
| 13,3 | 13,5 | 0,6 | 3 | 1 | 22 | 2011 |
| 17,2 | 29,2 | 0,6 | 5 | 1 | 20 | 2010 |
| 17,2 | 29,2 | 0,6 | 5 | 1 | 20 | 2010 |
| 16,2 | 24,4 | 0,6 | 4 | 1 | 18 | 2000 |
| 16,2 | 24,4 | 0,6 | 7 | 1 | 19 | 2014 |
| 13,2 | 13,2 | 0,6 | 2 | 1 | 20 | 2002 |
| 17,1 | 28,7 | 0,6 | 5 | 1 | 17 | 2002 |
| 17   | 28,2 | 0,6 | 6 | 1 | 18 | 1999 |
| 14,5 | 17,5 | 0,6 | 4 | 1 | 20 | 2009 |
| 17,6 | 31,3 | 0,6 | 5 | 1 | 20 | 2010 |
| 17,6 | 31,3 | 0,6 | 5 | 1 | 20 | 2010 |
| 14,1 | 16,1 | 0,6 | 2 | 1 | 22 | 2001 |
| 14,1 | 16,1 | 0,6 | 4 | 1 | 24 | 2001 |
| 14,1 | 16,1 | 0,6 | 2 | 1 | 19 | 2014 |
| 14,1 | 16,1 | 0,6 | 4 | 1 | 18 | 2015 |
| 14,3 | 16,8 | 0,6 | 3 | 1 | 23 | 2002 |
| 14,3 | 16,8 | 0,6 | 2 | 1 | 20 | 2006 |

|      |      |     |   |   |    |      |
|------|------|-----|---|---|----|------|
| 14,3 | 16,8 | 0,6 | 3 | 1 | 21 | 2010 |
| 14,3 | 16,8 | 0,6 | 5 | 1 | 23 | 2010 |
| 14,3 | 16,8 | 0,6 | 3 | 1 | 21 | 2010 |
| 14,3 | 16,8 | 0,6 | 5 | 1 | 23 | 2010 |
| 14,3 | 16,8 | 0,6 | 4 | 1 | 20 | 2013 |
| 14,3 | 16,8 | 0,6 | 3 | 1 | 15 | 2015 |
| 14,3 | 16,8 | 0,6 | 3 | 1 | 18 | 2015 |
| 15,5 | 21,4 | 0,6 | 5 | 1 | 22 | 2009 |
| 15,5 | 21,4 | 0,6 | 5 | 1 | 21 | 2012 |
| 15,5 | 21,4 | 0,6 | 5 | 1 | 19 | 2014 |
| 15   | 19,4 | 0,6 | 3 | 1 | 26 | 2003 |
| 15   | 19,4 | 0,6 | 4 | 1 | 25 | 2004 |
| 15   | 19,4 | 0,6 | 4 | 1 | 19 | 2012 |
| 15   | 19,4 | 0,6 | 3 | 1 | 18 | 2014 |
| 12,6 | 11,5 | 0,6 | 2 | 1 | 23 | 2008 |
| 12,6 | 11,5 | 0,6 | 2 | 1 | 23 | 2009 |
| 16,3 | 24,9 | 0,6 | 3 | 1 | 19 | 2012 |
| 12,3 | 10,7 | 0,6 | 2 | 1 | 26 | 2006 |
| 15,3 | 20,6 | 0,6 | 3 | 1 | 20 | 2003 |

|      |      |     |   |   |    |      |
|------|------|-----|---|---|----|------|
| 14,6 | 17,9 | 0,6 | 3 | 1 | 26 | 2003 |
| 14,6 | 17,9 | 0,6 | 4 | 1 | 21 | 2013 |
| 15,2 | 20,2 | 0,6 | 4 | 1 | 21 | 2000 |
| 15,2 | 20,2 | 0,6 | 4 | 1 | 20 | 2012 |
| 15,8 | 22,7 | 0,6 | 5 | 1 | 18 | 2000 |
| 15,8 | 22,7 | 0,6 | 4 | 1 | 20 | 2013 |
| 13,7 | 14,8 | 0,6 | 3 | 1 | 22 | 2015 |
| 12,1 | 10,2 | 0,6 | 2 | 1 | 18 | 2007 |
| 14   | 15,8 | 0,6 | 3 | 1 | 19 | 1999 |
| 14   | 15,8 | 0,6 | 2 | 1 | 23 | 2003 |
| 14   | 15,8 | 0,6 | 3 | 1 | 18 | 2008 |
| 14   | 15,8 | 0,6 | 4 | 1 | 20 | 2011 |
| 14   | 15,8 | 0,6 | 2 | 1 | 19 | 2014 |
| 14   | 15,8 | 0,6 | 2 | 1 | 21 | 2015 |
| 17,2 | 29,3 | 0,6 | 5 | 1 | 17 | 2014 |
| 16,4 | 25,4 | 0,6 | 4 | 1 | 19 | 2002 |
| 17   | 28,3 | 0,6 | 4 | 1 | 19 | 2015 |
| 14,4 | 17,2 | 0,6 | 3 | 1 | 17 | 2014 |
| 12,7 | 11,8 | 0,6 | 2 | 1 | 19 | 2000 |

|      |      |     |   |   |    |      |
|------|------|-----|---|---|----|------|
| 12,7 | 11,8 | 0,6 | 2 | 1 | 26 | 2006 |
| 12,7 | 11,8 | 0,6 | 2 | 1 | 19 | 2010 |
| 12,7 | 11,8 | 0,6 | 2 | 1 | 19 | 2010 |
| 14,7 | 18,3 | 0,6 | 3 | 1 | 26 | 2006 |
| 14,7 | 18,3 | 0,6 | 3 | 1 | 20 | 2013 |
| 14,7 | 18,3 | 0,6 | 3 | 1 | 18 | 2015 |
| 16   | 23,6 | 0,6 | 5 | 1 | 21 | 2005 |
| 14,2 | 16,5 | 0,6 | 3 | 1 | 22 | 2003 |
| 14,2 | 16,5 | 0,6 | 3 | 1 | 20 | 2007 |
| 14,2 | 16,5 | 0,6 | 4 | 1 | 22 | 2009 |
| 14,2 | 16,5 | 0,6 | 3 | 1 | 19 | 2010 |
| 14,2 | 16,5 | 0,6 | 3 | 1 | 19 | 2010 |
| 13,6 | 14,5 | 0,6 | 2 | 1 | 23 | 2010 |
| 13,6 | 14,5 | 0,6 | 2 | 1 | 23 | 2010 |
| 13,6 | 14,5 | 0,6 | 3 | 1 | 23 | 2010 |
| 13,6 | 14,5 | 0,6 | 2 | 1 | 23 | 2010 |
| 13,6 | 14,5 | 0,6 | 2 | 1 | 23 | 2010 |
| 13,6 | 14,5 | 0,6 | 3 | 1 | 23 | 2010 |
| 16,5 | 25,9 | 0,6 | 7 | 1 | 26 | 1999 |

|      |      |     |   |   |    |      |
|------|------|-----|---|---|----|------|
| 11,6 | 9    | 0,6 | 2 | 1 | 22 | 2009 |
| 15,6 | 21,9 | 0,6 | 6 | 1 | 26 | 2000 |
| 15,6 | 21,9 | 0,6 | 5 | 1 | 19 | 2010 |
| 15,6 | 21,9 | 0,6 | 5 | 1 | 19 | 2010 |
| 12,4 | 11   | 0,6 | 2 | 1 | 24 | 2006 |
| 12,4 | 11   | 0,6 | 2 | 1 | 22 | 2011 |
| 13,5 | 14,2 | 0,6 | 2 | 1 | 21 | 2000 |
| 13,5 | 14,2 | 0,6 | 2 | 1 | 21 | 2008 |
| 13,5 | 14,2 | 0,6 | 2 | 1 | 21 | 2010 |
| 13,5 | 14,2 | 0,6 | 2 | 1 | 21 | 2010 |
| 13,5 | 14,2 | 0,6 | 3 | 1 | 20 | 2011 |
| 13,9 | 15,5 | 0,6 | 3 | 1 | 18 | 2008 |
| 16,3 | 25   | 0,6 | 5 | 1 | 24 | 2009 |
| 14,5 | 17,6 | 0,6 | 4 | 1 | 20 | 2004 |
| 14,5 | 17,6 | 0,6 | 3 | 1 | 20 | 2010 |
| 14,5 | 17,6 | 0,6 | 3 | 1 | 20 | 2010 |
| 14,5 | 17,6 | 0,6 | 4 | 1 | 18 | 2015 |
| 15,5 | 21,5 | 0,6 | 3 | 1 | 23 | 2001 |
| 15,5 | 21,5 | 0,6 | 4 | 1 | 22 | 2004 |

|      |      |     |   |   |    |      |
|------|------|-----|---|---|----|------|
| 15,5 | 21,5 | 0,6 | 3 | 1 | 21 | 2010 |
| 15,5 | 21,5 | 0,6 | 3 | 1 | 21 | 2010 |
| 15,5 | 21,5 | 0,6 | 3 | 1 | 19 | 2014 |
| 16,1 | 24,1 | 0,6 | 3 | 1 | 21 | 2015 |
| 12,9 | 12,4 | 0,6 | 2 | 1 | 24 | 2006 |
| 12,9 | 12,4 | 0,6 | 2 | 1 | 26 | 2006 |
| 12,9 | 12,4 | 0,6 | 3 | 1 | 20 | 2008 |
| 11,1 | 7,9  | 0,6 | 1 | 1 | 18 | 2007 |
| 13,4 | 13,9 | 0,6 | 2 | 1 | 20 | 2000 |
| 13,4 | 13,9 | 0,6 | 3 | 1 | 22 | 2005 |
| 13,4 | 13,9 | 0,6 | 2 | 1 | 18 | 2014 |
| 15,4 | 21,1 | 0,6 | 4 | 1 | 18 | 2002 |
| 15   | 19,5 | 0,6 | 4 | 1 | 22 | 2004 |
| 15   | 19,5 | 0,6 | 4 | 1 | 24 | 2006 |
| 15   | 19,5 | 0,6 | 5 | 1 | 21 | 2010 |
| 15   | 19,5 | 0,6 | 5 | 1 | 21 | 2010 |
| 17,2 | 29,4 | 0,6 | 4 | 1 | 20 | 2013 |
| 14,1 | 16,2 | 0,6 | 3 | 1 | 26 | 2003 |
| 14,1 | 16,2 | 0,6 | 4 | 1 | 24 | 2009 |

|      |      |     |   |   |    |      |
|------|------|-----|---|---|----|------|
| 14,3 | 16,9 | 0,6 | 4 | 1 | 23 | 2011 |
| 14,3 | 16,9 | 0,6 | 4 | 1 | 23 | 2011 |
| 14,3 | 16,9 | 0,6 | 4 | 1 | 18 | 2015 |
| 14,3 | 16,9 | 0,6 | 4 | 1 | 18 | 2015 |
| 15,3 | 20,7 | 0,6 | 5 | 1 | 17 | 2002 |
| 15,3 | 20,7 | 0,6 | 3 | 1 | 20 | 2003 |
| 15,3 | 20,7 | 0,6 | 3 | 1 | 22 | 2004 |
| 15,3 | 20,7 | 0,6 | 5 | 1 | 26 | 2006 |
| 15,3 | 20,7 | 0,6 | 5 | 1 | 23 | 2010 |
| 15,3 | 20,7 | 0,6 | 5 | 1 | 23 | 2010 |
| 15,3 | 20,7 | 0,6 | 8 | 1 | 20 | 2013 |
| 15,3 | 20,7 | 0,6 | 3 | 1 | 18 | 2014 |
| 15,1 | 19,9 | 0,6 | 6 | 1 | 17 | 2008 |
| 15,1 | 19,9 | 0,6 | 4 | 1 | 22 | 2011 |
| 15,8 | 22,8 | 0,6 | 4 | 1 | 19 | 2004 |
| 15,8 | 22,8 | 0,6 | 6 | 1 | 19 | 2008 |
| 15,2 | 20,3 | 0,6 | 3 | 1 | 20 | 2001 |
| 15,2 | 20,3 | 0,6 | 5 | 1 | 20 | 2007 |
| 15,2 | 20,3 | 0,6 | 5 | 1 | 17 | 2008 |

|      |      |     |   |   |    |      |
|------|------|-----|---|---|----|------|
| 13   | 12,7 | 0,6 | 3 | 1 | 21 | 2005 |
| 13   | 12,7 | 0,6 | 2 | 1 | 21 | 2006 |
| 13   | 12,7 | 0,6 | 2 | 1 | 26 | 2009 |
| 13   | 12,7 | 0,6 | 2 | 1 | 23 | 2011 |
| 13   | 12,7 | 0,6 | 3 | 1 | 18 | 2015 |
| 13,3 | 13,6 | 0,6 | 2 | 1 | 25 | 2003 |
| 13,3 | 13,6 | 0,6 | 2 | 1 | 20 | 2013 |
| 12,2 | 10,5 | 0,6 | 2 | 1 | 20 | 2010 |
| 12,2 | 10,5 | 0,6 | 2 | 1 | 20 | 2010 |
| 13,1 | 13   | 0,6 | 2 | 1 | 23 | 2006 |
| 13,1 | 13   | 0,6 | 2 | 1 | 19 | 2013 |
| 13,1 | 13   | 0,6 | 2 | 1 | 20 | 2013 |
| 13,2 | 13,3 | 0,6 | 2 | 1 | 20 | 2002 |
| 13,8 | 15,2 | 0,6 | 4 | 1 | 20 | 2009 |
| 13,8 | 15,2 | 0,6 | 3 | 1 | 18 | 2015 |
| 14,6 | 18   | 0,6 | 3 | 1 | 15 | 2015 |
| 12,5 | 11,3 | 0,6 | 2 | 1 | 23 | 1999 |
| 12,5 | 11,3 | 0,6 | 3 | 1 | 22 | 2005 |
| 12,5 | 11,3 | 0,6 | 3 | 1 | 22 | 2011 |

|      |      |     |   |   |    |      |
|------|------|-----|---|---|----|------|
| 12,5 | 11,3 | 0,6 | 2 | 1 | 20 | 2013 |
| 16   | 23,7 | 0,6 | 4 | 1 | 19 | 2002 |
| 16,2 | 24,6 | 0,6 | 6 | 1 | 22 | 2007 |
| 12   | 10   | 0,6 | 2 | 1 | 23 | 2006 |
| 16,5 | 26   | 0,6 | 6 | 1 | 26 | 2006 |
| 15,7 | 22,4 | 0,6 | 5 | 1 | 20 | 1999 |
| 15,7 | 22,4 | 0,6 | 5 | 1 | 19 | 2002 |
| 14,7 | 18,4 | 0,6 | 5 | 1 | 19 | 1999 |
| 16,6 | 26,5 | 0,6 | 4 | 1 | 18 | 2015 |
| 14,4 | 17,3 | 0,6 | 3 | 1 | 21 | 2000 |
| 14,4 | 17,3 | 0,6 | 3 | 1 | 18 | 2015 |
| 14   | 15,9 | 0,6 | 2 | 1 | 20 | 2006 |
| 14   | 15,9 | 0,6 | 3 | 1 | 19 | 2008 |
| 14   | 15,9 | 0,6 | 2 | 1 | 17 | 2014 |
| 14   | 15,9 | 0,6 | 3 | 1 | 19 | 2014 |
| 13,7 | 14,9 | 0,6 | 2 | 1 | 20 | 2002 |
| 15,6 | 22   | 0,6 | 3 | 1 | 20 | 2003 |
| 15,6 | 22   | 0,6 | 5 | 1 | 21 | 2011 |
| 10,7 | 7,1  | 0,6 | 2 | 1 | 23 | 2004 |

|      |      |     |   |   |    |      |
|------|------|-----|---|---|----|------|
| 16,3 | 25,1 | 0,6 | 4 | 1 | 21 | 2003 |
| 15,9 | 23,3 | 0,6 | 5 | 1 | 19 | 2007 |
| 16,7 | 27   | 0,6 | 4 | 1 | 23 | 2001 |
| 16,7 | 27   | 0,6 | 6 | 1 | 26 | 2001 |
| 16,7 | 27   | 0,6 | 7 | 1 | 17 | 2009 |
| 14,2 | 16,6 | 0,6 | 2 | 1 | 20 | 2000 |
| 14,2 | 16,6 | 0,6 | 3 | 1 | 23 | 2010 |
| 14,2 | 16,6 | 0,6 | 3 | 1 | 23 | 2010 |
| 12,6 | 11,6 | 0,6 | 2 | 1 | 21 | 2006 |
| 14,8 | 18,8 | 0,6 | 3 | 1 | 22 | 2001 |
| 14,8 | 18,8 | 0,6 | 4 | 1 | 17 | 2002 |
| 14,8 | 18,8 | 0,6 | 2 | 1 | 19 | 2013 |
| 15,5 | 21,6 | 0,6 | 4 | 1 | 20 | 2003 |
| 16,9 | 28   | 0,6 | 6 | 1 | 20 | 2013 |
| 12,3 | 10,8 | 0,6 | 2 | 1 | 23 | 2009 |
| 12,3 | 10,8 | 0,6 | 2 | 1 | 22 | 2011 |
| 12,3 | 10,8 | 0,6 | 2 | 1 | 18 | 2014 |
| 13,6 | 14,6 | 0,6 | 4 | 1 | 26 | 2006 |
| 14,9 | 19,2 | 0,6 | 3 | 1 | 20 | 2010 |

|      |      |     |    |   |    |      |
|------|------|-----|----|---|----|------|
| 14,9 | 19,2 | 0,6 | 3  | 1 | 20 | 2010 |
| 15,4 | 21,2 | 0,6 | 4  | 1 | 20 | 2006 |
| 15,4 | 21,2 | 0,6 | 3  | 1 | 21 | 2010 |
| 15,4 | 21,2 | 0,6 | 3  | 1 | 21 | 2010 |
| 15,4 | 21,2 | 0,6 | 4  | 1 | 21 | 2013 |
| 11,4 | 8,6  | 0,6 | 1  | 1 | 26 | 2009 |
| 18,2 | 35   | 0,6 | 10 | 1 | 19 | 2015 |
| 14,5 | 17,7 | 0,6 | 5  | 1 | 18 | 2000 |
| 14,5 | 17,7 | 0,6 | 5  | 1 | 20 | 2000 |
| 14,5 | 17,7 | 0,6 | 2  | 1 | 22 | 2001 |
| 15   | 19,6 | 0,6 | 5  | 1 | 23 | 1999 |
| 15   | 19,6 | 0,6 | 3  | 1 | 18 | 2007 |
| 15   | 19,6 | 0,6 | 4  | 1 | 23 | 2007 |
| 15,3 | 20,8 | 0,6 | 3  | 1 | 20 | 2000 |
| 13,9 | 15,6 | 0,6 | 4  | 1 | 17 | 2008 |
| 13,9 | 15,6 | 0,6 | 3  | 1 | 23 | 2011 |
| 13,9 | 15,6 | 0,6 | 3  | 1 | 18 | 2014 |
| 13,9 | 15,6 | 0,6 | 2  | 1 | 18 | 2014 |
| 15,1 | 20   | 0,6 | 5  | 1 | 22 | 1999 |

|      |      |     |   |   |    |      |
|------|------|-----|---|---|----|------|
| 15,1 | 20   | 0,6 | 4 | 1 | 23 | 2004 |
| 15,2 | 20,4 | 0,6 | 3 | 1 | 21 | 2003 |
| 12,7 | 11,9 | 0,6 | 1 | 1 | 26 | 2001 |
| 12,7 | 11,9 | 0,6 | 2 | 1 | 23 | 2009 |
| 16,2 | 24,7 | 0,6 | 5 | 1 | 18 | 2000 |
| 16,2 | 24,7 | 0,6 | 4 | 1 | 18 | 2014 |
| 16,2 | 24,7 | 0,6 | 4 | 1 | 19 | 2014 |
| 16   | 23,8 | 0,6 | 4 | 1 | 25 | 2003 |
| 16   | 23,8 | 0,6 | 5 | 1 | 22 | 2005 |
| 16   | 23,8 | 0,6 | 7 | 1 | 26 | 2006 |
| 16   | 23,8 | 0,6 | 3 | 1 | 16 | 2015 |
| 13,5 | 14,3 | 0,6 | 2 | 1 | 20 | 2002 |
| 18   | 33,9 | 0,6 | 6 | 1 | 23 | 2002 |
| 14,3 | 17   | 0,6 | 6 | 1 | 23 | 2010 |
| 14,3 | 17   | 0,6 | 6 | 1 | 23 | 2010 |
| 12,1 | 10,3 | 0,6 | 2 | 1 | 23 | 2004 |
| 15,7 | 22,5 | 0,6 | 5 | 1 | 19 | 2002 |
| 14,1 | 16,3 | 0,6 | 6 | 1 | 21 | 2005 |
| 14,1 | 16,3 | 0,6 | 4 | 1 | 19 | 2009 |

|      |      |     |   |   |    |      |
|------|------|-----|---|---|----|------|
| 14,1 | 16,3 | 0,6 | 3 | 1 | 20 | 2010 |
| 14,1 | 16,3 | 0,6 | 3 | 1 | 20 | 2010 |
| 17,8 | 32,8 | 0,6 | 4 | 1 | 15 | 2015 |
| 14,6 | 18,1 | 0,6 | 3 | 1 | 26 | 2001 |
| 14,6 | 18,1 | 0,6 | 3 | 1 | 19 | 2008 |
| 12,8 | 12,2 | 0,6 | 2 | 1 | 15 | 2015 |
| 13,4 | 14   | 0,6 | 2 | 1 | 18 | 2000 |
| 13,4 | 14   | 0,6 | 3 | 1 | 19 | 2002 |
| 13,4 | 14   | 0,6 | 2 | 1 | 19 | 2009 |
| 16,8 | 27,6 | 0,6 | 3 | 1 | 17 | 2012 |
| 11,3 | 8,4  | 0,6 | 1 | 1 | 20 | 2000 |
| 16,9 | 28,1 | 0,6 | 5 | 1 | 18 | 2012 |
| 13,8 | 15,3 | 0,6 | 2 | 1 | 18 | 2000 |
| 13,8 | 15,3 | 0,6 | 3 | 1 | 23 | 2004 |
| 13,8 | 15,3 | 0,6 | 2 | 1 | 22 | 2009 |
| 13,8 | 15,3 | 0,6 | 3 | 1 | 20 | 2010 |
| 13,8 | 15,3 | 0,6 | 3 | 1 | 20 | 2010 |
| 12,4 | 11,1 | 0,6 | 2 | 1 | 26 | 2009 |
| 12,4 | 11,1 | 0,6 | 2 | 1 | 20 | 2013 |

|      |      |     |   |   |    |      |
|------|------|-----|---|---|----|------|
| 16,1 | 24,3 | 0,6 | 4 | 1 | 19 | 2015 |
| 18,3 | 35,7 | 0,6 | 4 | 1 | 19 | 2012 |
| 13   | 12,8 | 0,6 | 2 | 1 | 18 | 2002 |
| 13   | 12,8 | 0,6 | 2 | 1 | 25 | 2007 |
| 13   | 12,8 | 0,6 | 2 | 1 | 26 | 2009 |
| 13   | 12,8 | 0,6 | 2 | 1 | 23 | 2010 |
| 13   | 12,8 | 0,6 | 2 | 1 | 23 | 2010 |
| 13   | 12,8 | 0,6 | 2 | 1 | 23 | 2011 |
| 13,2 | 13,4 | 0,6 | 2 | 1 | 20 | 2010 |
| 13,2 | 13,4 | 0,6 | 2 | 1 | 20 | 2010 |
| 13,2 | 13,4 | 0,6 | 2 | 1 | 17 | 2014 |
| 13,1 | 13,1 | 0,6 | 3 | 1 | 21 | 2000 |
| 13,1 | 13,1 | 0,6 | 3 | 1 | 18 | 2007 |
| 13,1 | 13,1 | 0,6 | 2 | 1 | 20 | 2010 |
| 13,1 | 13,1 | 0,6 | 2 | 1 | 20 | 2010 |
| 13,1 | 13,1 | 0,6 | 4 | 1 | 22 | 2011 |
| 13,1 | 13,1 | 0,6 | 2 | 1 | 18 | 2014 |
| 14,4 | 17,4 | 0,6 | 5 | 1 | 19 | 1999 |
| 14,4 | 17,4 | 0,6 | 7 | 1 | 22 | 2011 |

|      |      |     |   |   |    |      |
|------|------|-----|---|---|----|------|
| 15,5 | 21,7 | 0,6 | 5 | 1 | 21 | 2010 |
| 15,5 | 21,7 | 0,6 | 5 | 1 | 21 | 2010 |
| 14   | 16   | 0,6 | 2 | 1 | 21 | 2000 |
| 14   | 16   | 0,6 | 2 | 1 | 26 | 2001 |
| 14   | 16   | 0,6 | 2 | 1 | 20 | 2003 |
| 14   | 16   | 0,6 | 3 | 1 | 18 | 2008 |
| 14   | 16   | 0,6 | 3 | 1 | 20 | 2008 |
| 14   | 16   | 0,6 | 4 | 1 | 26 | 2009 |
| 14   | 16   | 0,6 | 3 | 1 | 21 | 2014 |
| 16,5 | 26,2 | 0,6 | 4 | 1 | 22 | 2015 |
| 14,2 | 16,7 | 0,6 | 4 | 1 | 24 | 2009 |
| 14,2 | 16,7 | 0,6 | 4 | 1 | 26 | 2009 |
| 14,2 | 16,7 | 0,6 | 6 | 1 | 21 | 2011 |
| 14,2 | 16,7 | 0,6 | 3 | 1 | 23 | 2011 |
| 16,2 | 24,8 | 0,6 | 4 | 1 | 17 | 2014 |
| 13,7 | 15   | 0,6 | 2 | 1 | 18 | 2001 |
| 13,7 | 15   | 0,6 | 3 | 1 | 26 | 2001 |
| 13,7 | 15   | 0,6 | 3 | 1 | 21 | 2009 |
| 13,7 | 15   | 0,6 | 3 | 1 | 26 | 2009 |

|      |      |     |   |   |    |      |
|------|------|-----|---|---|----|------|
| 13,7 | 15   | 0,6 | 3 | 1 | 22 | 2011 |
| 14,9 | 19,3 | 0,6 | 4 | 1 | 19 | 1999 |
| 16   | 23,9 | 0,6 | 4 | 1 | 15 | 2015 |
| 16   | 23,9 | 0,6 | 8 | 1 | 22 | 2015 |
| 15,3 | 20,9 | 0,6 | 7 | 1 | 26 | 2009 |
| 12,5 | 11,4 | 0,6 | 2 | 1 | 22 | 2011 |
| 15   | 19,7 | 0,6 | 5 | 1 | 21 | 1999 |
| 15   | 19,7 | 0,6 | 3 | 1 | 19 | 2008 |
| 12,2 | 10,6 | 0,6 | 2 | 1 | 23 | 2009 |
| 15,1 | 20,1 | 0,6 | 4 | 1 | 20 | 2008 |
| 14,5 | 17,8 | 0,6 | 4 | 1 | 19 | 2000 |
| 14,5 | 17,8 | 0,6 | 5 | 1 | 26 | 2006 |
| 14,5 | 17,8 | 0,6 | 4 | 1 | 24 | 2009 |
| 14,5 | 17,8 | 0,6 | 4 | 1 | 16 | 2015 |
| 15,7 | 22,6 | 0,6 | 4 | 1 | 22 | 2004 |
| 15,7 | 22,6 | 0,6 | 4 | 1 | 19 | 2011 |
| 16,3 | 25,3 | 0,6 | 5 | 1 | 24 | 2002 |
| 13,6 | 14,7 | 0,6 | 2 | 1 | 24 | 2001 |
| 13,6 | 14,7 | 0,6 | 2 | 1 | 18 | 2002 |

|      |      |     |   |   |    |      |
|------|------|-----|---|---|----|------|
| 12   | 10,1 | 0,6 | 2 | 1 | 19 | 2011 |
| 16,1 | 24,4 | 0,6 | 5 | 1 | 19 | 2002 |
| 16,1 | 24,4 | 0,6 | 5 | 1 | 20 | 2009 |
| 15,6 | 22,2 | 0,6 | 5 | 1 | 19 | 2012 |
| 14,3 | 17,1 | 0,6 | 4 | 1 | 19 | 1999 |
| 14,3 | 17,1 | 0,6 | 3 | 1 | 26 | 2001 |
| 14,3 | 17,1 | 0,6 | 2 | 1 | 18 | 2002 |
| 14,3 | 17,1 | 0,6 | 4 | 1 | 22 | 2004 |
| 14,3 | 17,1 | 0,6 | 2 | 1 | 25 | 2004 |
| 14,3 | 17,1 | 0,6 | 4 | 1 | 20 | 2013 |
| 14,6 | 18,2 | 0,6 | 5 | 1 | 20 | 2007 |
| 12,6 | 11,7 | 0,6 | 2 | 1 | 18 | 2008 |
| 14,1 | 16,4 | 0,6 | 4 | 1 | 21 | 2006 |
| 14,1 | 16,4 | 0,6 | 2 | 1 | 19 | 2013 |
| 14,1 | 16,4 | 0,6 | 3 | 1 | 18 | 2014 |
| 14,1 | 16,4 | 0,6 | 3 | 1 | 19 | 2014 |
| 14,1 | 16,4 | 0,6 | 3 | 1 | 18 | 2015 |
| 11,5 | 8,9  | 0,6 | 2 | 1 | 20 | 2004 |
| 11,5 | 8,9  | 0,6 | 2 | 1 | 22 | 2005 |

|      |      |     |   |   |    |      |
|------|------|-----|---|---|----|------|
| 17,3 | 30,3 | 0,6 | 5 | 1 | 20 | 2002 |
| 13,5 | 14,4 | 0,6 | 2 | 1 | 20 | 2010 |
| 13,5 | 14,4 | 0,6 | 2 | 1 | 20 | 2010 |
| 13,5 | 14,4 | 0,6 | 2 | 1 | 19 | 2014 |
| 13,5 | 14,4 | 0,6 | 2 | 1 | 23 | 2015 |
| 15,5 | 21,8 | 0,6 | 5 | 1 | 18 | 1999 |
| 15,5 | 21,8 | 0,6 | 3 | 1 | 20 | 2003 |
| 15,5 | 21,8 | 0,6 | 5 | 1 | 23 | 2010 |
| 15,5 | 21,8 | 0,6 | 5 | 1 | 23 | 2010 |
| 16,5 | 26,3 | 0,6 | 4 | 1 | 19 | 2002 |
| 14,7 | 18,6 | 0,6 | 4 | 1 | 22 | 2004 |
| 14,7 | 18,6 | 0,6 | 5 | 1 | 21 | 2005 |
| 14,7 | 18,6 | 0,6 | 3 | 1 | 22 | 2015 |
| 15,8 | 23,1 | 0,6 | 5 | 1 | 21 | 2000 |
| 15,8 | 23,1 | 0,6 | 4 | 1 | 21 | 2010 |
| 15,8 | 23,1 | 0,6 | 4 | 1 | 21 | 2010 |
| 12,7 | 12   | 0,6 | 2 | 1 | 22 | 1999 |
| 16,6 | 26,8 | 0,6 | 6 | 1 | 20 | 2010 |
| 16,6 | 26,8 | 0,6 | 6 | 1 | 20 | 2010 |

|      |      |     |   |   |    |      |
|------|------|-----|---|---|----|------|
| 16   | 24   | 0,6 | 6 | 1 | 22 | 1999 |
| 16   | 24   | 0,6 | 3 | 1 | 22 | 2003 |
| 15,4 | 21,4 | 0,6 | 6 | 1 | 19 | 2000 |
| 17,1 | 29,3 | 0,6 | 6 | 1 | 21 | 2005 |
| 13,4 | 14,1 | 0,6 | 2 | 1 | 20 | 2002 |
| 13,4 | 14,1 | 0,6 | 5 | 1 | 21 | 2006 |
| 13,4 | 14,1 | 0,6 | 3 | 1 | 19 | 2009 |
| 14,4 | 17,5 | 0,6 | 5 | 1 | 26 | 2009 |
| 14,4 | 17,5 | 0,6 | 3 | 1 | 19 | 2015 |
| 15,3 | 21   | 0,6 | 3 | 1 | 19 | 2010 |
| 15,3 | 21   | 0,6 | 3 | 1 | 19 | 2010 |
| 14,9 | 19,4 | 0,6 | 3 | 1 | 26 | 2003 |
| 16,3 | 25,4 | 0,6 | 6 | 1 | 19 | 2000 |
| 13,3 | 13,8 | 0,6 | 2 | 1 | 20 | 2002 |
| 13,3 | 13,8 | 0,6 | 2 | 1 | 20 | 2002 |
| 13,3 | 13,8 | 0,6 | 3 | 1 | 20 | 2011 |
| 15,2 | 20,6 | 0,6 | 3 | 1 | 20 | 2003 |
| 15   | 19,8 | 0,6 | 5 | 1 | 20 | 1999 |
| 15   | 19,8 | 0,6 | 3 | 1 | 21 | 2000 |

|      |      |     |   |   |    |      |
|------|------|-----|---|---|----|------|
| 15   | 19,8 | 0,6 | 4 | 1 | 20 | 2004 |
| 15   | 19,8 | 0,6 | 4 | 1 | 23 | 2006 |
| 15   | 19,8 | 0,6 | 4 | 1 | 20 | 2009 |
| 15   | 19,8 | 0,6 | 6 | 1 | 19 | 2011 |
| 15   | 19,8 | 0,6 | 4 | 1 | 22 | 2011 |
| 15   | 19,8 | 0,6 | 4 | 1 | 17 | 2012 |
| 15   | 19,8 | 0,6 | 3 | 1 | 19 | 2013 |
| 15   | 19,8 | 0,6 | 4 | 1 | 21 | 2014 |
| 15   | 19,8 | 0,6 | 3 | 1 | 18 | 2015 |
| 15,1 | 20,2 | 0,6 | 5 | 1 | 22 | 1999 |
| 15,1 | 20,2 | 0,6 | 6 | 1 | 20 | 2000 |
| 15,1 | 20,2 | 0,6 | 3 | 1 | 20 | 2001 |
| 14   | 16,1 | 0,6 | 3 | 1 | 26 | 2003 |
| 14   | 16,1 | 0,6 | 3 | 1 | 21 | 2005 |
| 14   | 16,1 | 0,6 | 2 | 1 | 20 | 2008 |
| 14   | 16,1 | 0,6 | 3 | 1 | 19 | 2014 |
| 14,2 | 16,8 | 0,6 | 5 | 1 | 26 | 2006 |
| 14,2 | 16,8 | 0,6 | 3 | 1 | 23 | 2008 |
| 11,7 | 9,4  | 0,6 | 1 | 1 | 23 | 2009 |

|      |      |     |   |   |    |      |
|------|------|-----|---|---|----|------|
| 12,9 | 12,6 | 0,6 | 2 | 1 | 26 | 2005 |
| 13,2 | 13,5 | 0,6 | 2 | 1 | 20 | 2001 |
| 13,2 | 13,5 | 0,6 | 4 | 1 | 22 | 2004 |
| 13,2 | 13,5 | 0,6 | 3 | 1 | 23 | 2010 |
| 13,2 | 13,5 | 0,6 | 3 | 1 | 23 | 2010 |
| 13,2 | 13,5 | 0,6 | 2 | 1 | 19 | 2013 |
| 13,2 | 13,5 | 0,6 | 2 | 1 | 20 | 2013 |
| 13,2 | 13,5 | 0,6 | 2 | 1 | 18 | 2014 |
| 15,9 | 23,6 | 0,6 | 3 | 1 | 17 | 2008 |
| 17,3 | 30,4 | 0,6 | 3 | 1 | 21 | 2010 |
| 17,3 | 30,4 | 0,6 | 3 | 1 | 21 | 2010 |
| 14,5 | 17,9 | 0,6 | 3 | 1 | 20 | 2001 |
| 14,5 | 17,9 | 0,6 | 3 | 1 | 20 | 2002 |
| 14,5 | 17,9 | 0,6 | 3 | 1 | 18 | 2007 |
| 14,5 | 17,9 | 0,6 | 3 | 1 | 20 | 2013 |
| 13   | 12,9 | 0,6 | 2 | 1 | 21 | 2000 |
| 13   | 12,9 | 0,6 | 4 | 1 | 23 | 2001 |
| 13   | 12,9 | 0,6 | 3 | 1 | 22 | 2005 |
| 13   | 12,9 | 0,6 | 2 | 1 | 26 | 2006 |

|      |      |     |   |   |    |      |
|------|------|-----|---|---|----|------|
| 13   | 12,9 | 0,6 | 4 | 1 | 26 | 2009 |
| 13   | 12,9 | 0,6 | 2 | 1 | 17 | 2014 |
| 13   | 12,9 | 0,6 | 2 | 1 | 21 | 2014 |
| 13   | 12,9 | 0,6 | 2 | 1 | 21 | 2014 |
| 13,1 | 13,2 | 0,6 | 2 | 1 | 21 | 2006 |
| 13,1 | 13,2 | 0,6 | 3 | 1 | 23 | 2008 |
| 13,7 | 15,1 | 0,6 | 4 | 1 | 25 | 2004 |
| 10,8 | 7,4  | 0,6 | 2 | 1 | 25 | 2004 |
| 16,5 | 26,4 | 0,6 | 6 | 1 | 18 | 2014 |
| 14,6 | 18,3 | 0,6 | 3 | 1 | 21 | 2000 |
| 14,6 | 18,3 | 0,6 | 3 | 1 | 25 | 2003 |
| 16,2 | 25   | 0,6 | 4 | 1 | 20 | 2012 |
| 15,5 | 21,9 | 0,6 | 7 | 1 | 23 | 2005 |
| 14,3 | 17,2 | 0,6 | 3 | 1 | 19 | 2008 |
| 14,3 | 17,2 | 0,6 | 2 | 1 | 20 | 2008 |
| 14,3 | 17,2 | 0,6 | 3 | 1 | 22 | 2011 |
| 14,3 | 17,2 | 0,6 | 3 | 1 | 19 | 2015 |
| 16,7 | 27,4 | 0,6 | 5 | 1 | 19 | 2000 |
| 16,7 | 27,4 | 0,6 | 4 | 1 | 18 | 2002 |

|      |      |     |   |   |    |      |
|------|------|-----|---|---|----|------|
| 13,9 | 15,8 | 0,6 | 2 | 1 | 25 | 2002 |
| 13,9 | 15,8 | 0,6 | 4 | 1 | 21 | 2005 |
| 13,9 | 15,8 | 0,6 | 2 | 1 | 18 | 2015 |
| 13,6 | 14,8 | 0,6 | 2 | 1 | 22 | 2001 |
| 13,6 | 14,8 | 0,6 | 2 | 1 | 26 | 2006 |
| 13,6 | 14,8 | 0,6 | 3 | 1 | 19 | 2007 |
| 13,6 | 14,8 | 0,6 | 3 | 1 | 23 | 2009 |
| 16   | 24,1 | 0,6 | 7 | 1 | 19 | 2001 |
| 16   | 24,1 | 0,6 | 3 | 1 | 23 | 2001 |
| 16   | 24,1 | 0,6 | 7 | 1 | 25 | 2007 |
| 16   | 24,1 | 0,6 | 3 | 1 | 20 | 2012 |
| 16   | 24,1 | 0,6 | 3 | 1 | 15 | 2015 |
| 16   | 24,1 | 0,6 | 3 | 1 | 16 | 2015 |
| 14,1 | 16,5 | 0,6 | 2 | 1 | 24 | 2001 |
| 14,1 | 16,5 | 0,6 | 4 | 1 | 20 | 2009 |
| 14,1 | 16,5 | 0,6 | 3 | 1 | 18 | 2014 |
| 15,4 | 21,5 | 0,6 | 4 | 1 | 23 | 2003 |
| 14,7 | 18,7 | 0,6 | 3 | 1 | 23 | 2010 |
| 14,7 | 18,7 | 0,6 | 3 | 1 | 23 | 2010 |

|      |      |     |   |   |    |      |
|------|------|-----|---|---|----|------|
| 14,7 | 18,7 | 0,6 | 3 | 1 | 17 | 2014 |
| 12,5 | 11,5 | 0,6 | 2 | 1 | 20 | 2013 |
| 16,3 | 25,5 | 0,6 | 4 | 1 | 19 | 2012 |
| 18,2 | 35,5 | 0,6 | 5 | 1 | 20 | 2010 |
| 18,2 | 35,5 | 0,6 | 5 | 1 | 20 | 2010 |
| 11,3 | 8,5  | 0,6 | 1 | 1 | 22 | 2007 |
| 15,3 | 21,1 | 0,6 | 5 | 1 | 23 | 1999 |
| 15,7 | 22,8 | 0,6 | 3 | 1 | 19 | 2001 |
| 14,8 | 19,1 | 0,6 | 3 | 1 | 26 | 2003 |
| 14,8 | 19,1 | 0,6 | 4 | 1 | 21 | 2006 |
| 14,8 | 19,1 | 0,6 | 4 | 1 | 22 | 2009 |
| 12,2 | 10,7 | 0,6 | 3 | 1 | 25 | 2004 |
| 13,5 | 14,5 | 0,6 | 3 | 1 | 19 | 2002 |
| 13,5 | 14,5 | 0,6 | 2 | 1 | 22 | 2011 |
| 13,5 | 14,5 | 0,6 | 3 | 1 | 21 | 2014 |
| 14,4 | 17,6 | 0,6 | 4 | 1 | 18 | 1999 |
| 14,4 | 17,6 | 0,6 | 3 | 1 | 19 | 2002 |
| 14,4 | 17,6 | 0,6 | 4 | 1 | 22 | 2004 |
| 15,2 | 20,7 | 0,6 | 5 | 1 | 17 | 2014 |

|      |      |     |   |   |    |      |
|------|------|-----|---|---|----|------|
| 16,4 | 26   | 0,6 | 3 | 1 | 23 | 2001 |
| 16,1 | 24,6 | 0,6 | 6 | 1 | 20 | 2001 |
| 16,1 | 24,6 | 0,6 | 5 | 1 | 19 | 2010 |
| 16,1 | 24,6 | 0,6 | 5 | 1 | 19 | 2010 |
| 16,1 | 24,6 | 0,6 | 7 | 1 | 18 | 2014 |
| 14,9 | 19,5 | 0,6 | 3 | 1 | 21 | 2006 |
| 14,9 | 19,5 | 0,6 | 3 | 1 | 19 | 2012 |
| 17,2 | 30   | 0,6 | 5 | 1 | 20 | 2010 |
| 17,2 | 30   | 0,6 | 5 | 1 | 20 | 2010 |
| 15,1 | 20,3 | 0,6 | 5 | 1 | 24 | 2006 |
| 15,1 | 20,3 | 0,6 | 5 | 1 | 26 | 2006 |
| 15,1 | 20,3 | 0,6 | 7 | 1 | 20 | 2011 |
| 15   | 19,9 | 0,6 | 3 | 1 | 26 | 2006 |
| 15   | 19,9 | 0,6 | 7 | 1 | 20 | 2009 |
| 15   | 19,9 | 0,6 | 3 | 1 | 18 | 2012 |
| 15   | 19,9 | 0,6 | 5 | 1 | 19 | 2012 |
| 15   | 19,9 | 0,6 | 3 | 1 | 21 | 2014 |
| 13,8 | 15,5 | 0,6 | 3 | 1 | 25 | 2003 |
| 13,8 | 15,5 | 0,6 | 3 | 1 | 18 | 2008 |

|      |      |     |   |   |    |      |
|------|------|-----|---|---|----|------|
| 13,8 | 15,5 | 0,6 | 3 | 1 | 18 | 2014 |
| 16,5 | 26,5 | 0,6 | 5 | 1 | 20 | 2013 |
| 10   | 5,9  | 0,6 | 1 | 1 | 24 | 2009 |
| 15,6 | 22,4 | 0,6 | 4 | 1 | 20 | 2008 |
| 13,4 | 14,2 | 0,6 | 4 | 1 | 19 | 2006 |
| 13,4 | 14,2 | 0,6 | 4 | 1 | 26 | 2009 |
| 14,2 | 16,9 | 0,6 | 2 | 1 | 26 | 2001 |
| 14,2 | 16,9 | 0,6 | 3 | 1 | 24 | 2002 |
| 16,6 | 27   | 0,6 | 3 | 1 | 22 | 2003 |
| 16,6 | 27   | 0,6 | 5 | 1 | 17 | 2014 |
| 12   | 10,2 | 0,6 | 2 | 1 | 20 | 2007 |
| 12   | 10,2 | 0,6 | 2 | 1 | 23 | 2007 |
| 11,8 | 9,7  | 0,6 | 2 | 1 | 23 | 2009 |
| 14   | 16,2 | 0,6 | 4 | 1 | 23 | 2006 |
| 14   | 16,2 | 0,6 | 2 | 1 | 22 | 2009 |
| 14   | 16,2 | 0,6 | 3 | 1 | 17 | 2014 |
| 14   | 16,2 | 0,6 | 3 | 1 | 19 | 2014 |
| 14,5 | 18   | 0,6 | 2 | 1 | 26 | 2001 |
| 14,5 | 18   | 0,6 | 2 | 1 | 22 | 2003 |

|      |      |     |   |   |    |      |
|------|------|-----|---|---|----|------|
| 17,8 | 33,3 | 0,6 | 5 | 1 | 21 | 2013 |
| 12,7 | 12,1 | 0,6 | 2 | 1 | 26 | 2006 |
| 11,2 | 8,3  | 0,6 | 2 | 1 | 19 | 2006 |
| 16   | 24,2 | 0,6 | 3 | 1 | 20 | 2003 |
| 16   | 24,2 | 0,6 | 4 | 1 | 23 | 2003 |
| 16   | 24,2 | 0,6 | 4 | 1 | 19 | 2013 |
| 13,3 | 13,9 | 0,6 | 2 | 1 | 18 | 2000 |
| 13,3 | 13,9 | 0,6 | 4 | 1 | 22 | 2009 |
| 13,3 | 13,9 | 0,6 | 2 | 1 | 20 | 2013 |
| 13,3 | 13,9 | 0,6 | 3 | 1 | 18 | 2014 |
| 16,3 | 25,6 | 0,6 | 4 | 1 | 24 | 2001 |
| 16,3 | 25,6 | 0,6 | 4 | 1 | 18 | 2002 |
| 12,3 | 11   | 0,6 | 2 | 1 | 22 | 2005 |
| 13,7 | 15,2 | 0,6 | 3 | 1 | 23 | 2003 |
| 13,7 | 15,2 | 0,6 | 3 | 1 | 22 | 2005 |
| 13,7 | 15,2 | 0,6 | 3 | 1 | 19 | 2012 |
| 13,7 | 15,2 | 0,6 | 2 | 1 | 19 | 2013 |
| 19,3 | 42,5 | 0,6 | 5 | 1 | 20 | 2012 |
| 14,6 | 18,4 | 0,6 | 5 | 1 | 19 | 1999 |

|      |      |     |   |   |    |      |
|------|------|-----|---|---|----|------|
| 14,6 | 18,4 | 0,6 | 4 | 1 | 21 | 1999 |
| 14,6 | 18,4 | 0,6 | 3 | 1 | 26 | 2003 |
| 12,8 | 12,4 | 0,6 | 3 | 1 | 23 | 2005 |
| 12,8 | 12,4 | 0,6 | 2 | 1 | 23 | 2005 |
| 12,8 | 12,4 | 0,6 | 2 | 1 | 23 | 2007 |
| 13,2 | 13,6 | 0,6 | 2 | 1 | 23 | 2001 |
| 13,2 | 13,6 | 0,6 | 3 | 1 | 21 | 2005 |
| 15,4 | 21,6 | 0,6 | 3 | 1 | 20 | 2003 |
| 15,4 | 21,6 | 0,6 | 3 | 1 | 15 | 2015 |
| 15,4 | 21,6 | 0,6 | 6 | 1 | 21 | 2015 |
| 13,1 | 13,3 | 0,6 | 3 | 1 | 21 | 2005 |
| 13,1 | 13,3 | 0,6 | 2 | 1 | 23 | 2006 |
| 13,1 | 13,3 | 0,6 | 3 | 1 | 20 | 2008 |
| 14,3 | 17,3 | 0,6 | 3 | 1 | 26 | 2003 |
| 14,3 | 17,3 | 0,6 | 2 | 1 | 20 | 2013 |
| 14,3 | 17,3 | 0,6 | 3 | 1 | 21 | 2014 |
| 14,3 | 17,3 | 0,6 | 3 | 1 | 23 | 2014 |
| 14,3 | 17,3 | 0,6 | 3 | 1 | 16 | 2015 |
| 16,4 | 26,1 | 0,6 | 6 | 1 | 24 | 2001 |

|      |      |     |   |   |    |      |
|------|------|-----|---|---|----|------|
| 13   | 13   | 0,6 | 3 | 1 | 25 | 2007 |
| 13   | 13   | 0,6 | 4 | 1 | 20 | 2009 |
| 13   | 13   | 0,6 | 2 | 1 | 23 | 2009 |
| 13   | 13   | 0,6 | 2 | 1 | 20 | 2011 |
| 13   | 13   | 0,6 | 3 | 1 | 17 | 2014 |
| 15,7 | 22,9 | 0,6 | 3 | 1 | 23 | 2003 |
| 15,7 | 22,9 | 0,6 | 3 | 1 | 18 | 2014 |
| 14,7 | 18,8 | 0,6 | 3 | 1 | 22 | 2005 |
| 16,1 | 24,7 | 0,6 | 3 | 1 | 18 | 2001 |
| 15,3 | 21,2 | 0,6 | 3 | 1 | 19 | 2002 |
| 15,3 | 21,2 | 0,6 | 3 | 1 | 20 | 2003 |
| 13,9 | 15,9 | 0,6 | 3 | 1 | 20 | 2008 |
| 15,9 | 23,8 | 0,6 | 5 | 1 | 19 | 2005 |
| 15,9 | 23,8 | 0,6 | 4 | 1 | 19 | 2013 |
| 14,1 | 16,6 | 0,6 | 4 | 1 | 23 | 2007 |
| 14,1 | 16,6 | 0,6 | 3 | 1 | 15 | 2015 |
| 14,8 | 19,2 | 0,6 | 3 | 1 | 20 | 2001 |
| 14,8 | 19,2 | 0,6 | 2 | 1 | 25 | 2003 |
| 14,8 | 19,2 | 0,6 | 4 | 1 | 25 | 2004 |

|      |      |     |   |   |    |      |
|------|------|-----|---|---|----|------|
| 11,1 | 8,1  | 0,6 | 2 | 1 | 22 | 2007 |
| 15,2 | 20,8 | 0,6 | 3 | 1 | 18 | 2002 |
| 15,2 | 20,8 | 0,6 | 4 | 1 | 22 | 2007 |
| 13,6 | 14,9 | 0,6 | 2 | 1 | 19 | 2013 |
| 13,6 | 14,9 | 0,6 | 3 | 1 | 23 | 2015 |
| 17,6 | 32,3 | 0,6 | 7 | 1 | 25 | 2004 |
| 14,9 | 19,6 | 0,6 | 8 | 1 | 26 | 2006 |
| 14,9 | 19,6 | 0,6 | 5 | 1 | 18 | 2007 |
| 15,1 | 20,4 | 0,6 | 3 | 1 | 21 | 2001 |
| 15,1 | 20,4 | 0,6 | 3 | 1 | 25 | 2002 |
| 15,1 | 20,4 | 0,6 | 6 | 1 | 20 | 2011 |
| 15   | 20   | 0,6 | 3 | 1 | 17 | 2002 |
| 15   | 20   | 0,6 | 3 | 1 | 17 | 2014 |
| 15   | 20   | 0,6 | 4 | 1 | 19 | 2014 |
| 15,6 | 22,5 | 0,6 | 4 | 1 | 21 | 2001 |
| 15,6 | 22,5 | 0,6 | 8 | 1 | 19 | 2002 |
| 15,6 | 22,5 | 0,6 | 5 | 1 | 24 | 2002 |
| 15,6 | 22,5 | 0,6 | 4 | 1 | 17 | 2009 |
| 15,6 | 22,5 | 0,6 | 4 | 1 | 22 | 2009 |

|      |      |     |   |   |    |      |
|------|------|-----|---|---|----|------|
| 15,6 | 22,5 | 0,6 | 4 | 1 | 19 | 2013 |
| 12,1 | 10,5 | 0,6 | 2 | 1 | 24 | 2006 |
| 12,1 | 10,5 | 0,6 | 2 | 1 | 20 | 2007 |
| 12,1 | 10,5 | 0,6 | 3 | 1 | 20 | 2008 |
| 14,4 | 17,7 | 0,6 | 3 | 1 | 20 | 2001 |
| 14,4 | 17,7 | 0,6 | 3 | 1 | 19 | 2008 |
| 14,4 | 17,7 | 0,6 | 3 | 1 | 18 | 2012 |
| 11,7 | 9,5  | 0,6 | 2 | 1 | 20 | 2004 |
| 11,7 | 9,5  | 0,6 | 2 | 1 | 25 | 2004 |
| 15,8 | 23,4 | 0,6 | 8 | 1 | 21 | 2015 |
| 16   | 24,3 | 0,6 | 3 | 1 | 19 | 2013 |
| 13,5 | 14,6 | 0,6 | 2 | 1 | 21 | 2000 |
| 13,5 | 14,6 | 0,6 | 2 | 1 | 19 | 2008 |
| 13,5 | 14,6 | 0,6 | 2 | 1 | 18 | 2014 |
| 16,3 | 25,7 | 0,6 | 5 | 1 | 21 | 2010 |
| 16,3 | 25,7 | 0,6 | 5 | 1 | 21 | 2010 |
| 16,3 | 25,7 | 0,6 | 5 | 1 | 18 | 2015 |
| 15,5 | 22,1 | 0,6 | 4 | 1 | 20 | 2011 |
| 15,5 | 22,1 | 0,6 | 3 | 1 | 19 | 2011 |

|      |      |     |   |   |    |      |
|------|------|-----|---|---|----|------|
| 15,5 | 22,1 | 0,6 | 3 | 1 | 21 | 2015 |
| 17,2 | 30,2 | 0,6 | 8 | 1 | 16 | 2008 |
| 17,2 | 30,2 | 0,6 | 5 | 1 | 19 | 2013 |
| 13,8 | 15,6 | 0,6 | 4 | 1 | 19 | 1999 |
| 13,8 | 15,6 | 0,6 | 3 | 1 | 22 | 2005 |
| 13,8 | 15,6 | 0,6 | 3 | 1 | 19 | 2014 |
| 18,1 | 35,2 | 0,6 | 5 | 1 | 17 | 2014 |
| 10,2 | 6,3  | 0,6 | 1 | 1 | 26 | 2009 |
| 14,5 | 18,1 | 0,6 | 3 | 1 | 23 | 2003 |
| 14,5 | 18,1 | 0,6 | 3 | 1 | 25 | 2003 |
| 14,5 | 18,1 | 0,6 | 3 | 1 | 19 | 2010 |
| 14,5 | 18,1 | 0,6 | 3 | 1 | 19 | 2010 |
| 14,2 | 17   | 0,6 | 3 | 1 | 25 | 2003 |
| 14,2 | 17   | 0,6 | 4 | 1 | 20 | 2004 |
| 14,2 | 17   | 0,6 | 4 | 1 | 23 | 2006 |
| 14,2 | 17   | 0,6 | 3 | 1 | 19 | 2007 |
| 14,2 | 17   | 0,6 | 3 | 1 | 23 | 2009 |
| 14,2 | 17   | 0,6 | 4 | 1 | 22 | 2011 |
| 12,5 | 11,6 | 0,6 | 2 | 1 | 23 | 2001 |

|      |      |     |   |   |    |      |
|------|------|-----|---|---|----|------|
| 12,5 | 11,6 | 0,6 | 2 | 1 | 23 | 2010 |
| 12,5 | 11,6 | 0,6 | 2 | 1 | 23 | 2010 |
| 11,4 | 8,8  | 0,6 | 2 | 1 | 23 | 2004 |
| 14   | 16,3 | 0,6 | 3 | 1 | 20 | 2006 |
| 14   | 16,3 | 0,6 | 3 | 1 | 20 | 2007 |
| 14   | 16,3 | 0,6 | 5 | 1 | 25 | 2007 |
| 14   | 16,3 | 0,6 | 3 | 1 | 17 | 2009 |
| 14   | 16,3 | 0,6 | 3 | 1 | 20 | 2011 |
| 14   | 16,3 | 0,6 | 3 | 1 | 19 | 2013 |
| 15,4 | 21,7 | 0,6 | 3 | 1 | 19 | 2001 |
| 15,4 | 21,7 | 0,6 | 4 | 1 | 23 | 2005 |
| 13,4 | 14,3 | 0,6 | 2 | 1 | 22 | 2009 |
| 15,7 | 23   | 0,6 | 8 | 1 | 23 | 2010 |
| 15,7 | 23   | 0,6 | 8 | 1 | 23 | 2010 |
| 17   | 29,2 | 0,6 | 6 | 1 | 20 | 2011 |
| 16,5 | 26,7 | 0,6 | 5 | 1 | 20 | 1999 |
| 16,5 | 26,7 | 0,6 | 5 | 1 | 21 | 2010 |
| 16,5 | 26,7 | 0,6 | 5 | 1 | 21 | 2010 |
| 14,6 | 18,5 | 0,6 | 3 | 1 | 25 | 2003 |

|      |      |     |   |   |    |      |
|------|------|-----|---|---|----|------|
| 14,6 | 18,5 | 0,6 | 3 | 1 | 22 | 2007 |
| 14,6 | 18,5 | 0,6 | 4 | 1 | 20 | 2011 |
| 15,9 | 23,9 | 0,6 | 3 | 1 | 26 | 2000 |
| 15,3 | 21,3 | 0,6 | 5 | 1 | 20 | 1999 |
| 15,3 | 21,3 | 0,6 | 3 | 1 | 18 | 2014 |
| 15,3 | 21,3 | 0,6 | 3 | 1 | 18 | 2015 |
| 16,7 | 27,7 | 0,6 | 6 | 1 | 20 | 2013 |
| 16,7 | 27,7 | 0,6 | 7 | 1 | 19 | 2014 |
| 12,2 | 10,8 | 0,6 | 3 | 1 | 21 | 2005 |
| 12,6 | 11,9 | 0,6 | 2 | 1 | 25 | 2007 |
| 12,6 | 11,9 | 0,6 | 2 | 1 | 23 | 2009 |
| 14,7 | 18,9 | 0,6 | 3 | 1 | 22 | 2001 |
| 14,7 | 18,9 | 0,6 | 4 | 1 | 19 | 2004 |
| 14,7 | 18,9 | 0,6 | 3 | 1 | 23 | 2011 |
| 14,7 | 18,9 | 0,6 | 3 | 1 | 19 | 2014 |
| 18   | 34,7 | 0,6 | 4 | 1 | 15 | 2015 |
| 13,7 | 15,3 | 0,6 | 3 | 1 | 22 | 2005 |
| 13,7 | 15,3 | 0,6 | 4 | 1 | 20 | 2009 |
| 13,7 | 15,3 | 0,6 | 3 | 1 | 15 | 2015 |

|      |      |     |   |   |    |      |
|------|------|-----|---|---|----|------|
| 14,3 | 17,4 | 0,6 | 2 | 1 | 24 | 2001 |
| 14,3 | 17,4 | 0,6 | 3 | 1 | 21 | 2003 |
| 13,3 | 14   | 0,6 | 2 | 1 | 22 | 2000 |
| 13,3 | 14   | 0,6 | 4 | 1 | 23 | 2006 |
| 13,3 | 14   | 0,6 | 2 | 1 | 26 | 2006 |
| 13,3 | 14   | 0,6 | 2 | 1 | 26 | 2009 |
| 13,3 | 14   | 0,6 | 2 | 1 | 20 | 2011 |
| 13,3 | 14   | 0,6 | 3 | 1 | 17 | 2014 |
| 13,3 | 14   | 0,6 | 3 | 1 | 15 | 2015 |
| 16,2 | 25,3 | 0,6 | 5 | 1 | 19 | 1999 |
| 16,2 | 25,3 | 0,6 | 6 | 1 | 20 | 2010 |
| 16,2 | 25,3 | 0,6 | 6 | 1 | 20 | 2010 |
| 15,2 | 20,9 | 0,6 | 4 | 1 | 17 | 2002 |
| 15,2 | 20,9 | 0,6 | 3 | 1 | 19 | 2013 |
| 15,2 | 20,9 | 0,6 | 3 | 1 | 19 | 2014 |
| 15,6 | 22,6 | 0,6 | 5 | 1 | 19 | 2010 |
| 15,6 | 22,6 | 0,6 | 5 | 1 | 19 | 2010 |
| 15,6 | 22,6 | 0,6 | 4 | 1 | 20 | 2012 |
| 18,1 | 35,3 | 0,6 | 8 | 1 | 21 | 2013 |

|      |      |     |   |   |    |      |
|------|------|-----|---|---|----|------|
| 14,8 | 19,3 | 0,6 | 5 | 1 | 26 | 2006 |
| 14,8 | 19,3 | 0,6 | 4 | 1 | 26 | 2006 |
| 14,8 | 19,3 | 0,6 | 3 | 1 | 19 | 2015 |
| 15,1 | 20,5 | 0,6 | 5 | 1 | 23 | 2007 |
| 15,1 | 20,5 | 0,6 | 5 | 1 | 19 | 2012 |
| 15,1 | 20,5 | 0,6 | 4 | 1 | 18 | 2015 |
| 15   | 20,1 | 0,6 | 3 | 1 | 23 | 2002 |
| 15   | 20,1 | 0,6 | 3 | 1 | 20 | 2003 |
| 15   | 20,1 | 0,6 | 4 | 1 | 24 | 2009 |
| 12,7 | 12,2 | 0,6 | 3 | 1 | 21 | 2005 |
| 12,7 | 12,2 | 0,6 | 2 | 1 | 21 | 2011 |
| 10,4 | 6,7  | 0,6 | 1 | 1 | 22 | 2009 |
| 13,2 | 13,7 | 0,6 | 2 | 1 | 18 | 2000 |
| 13,2 | 13,7 | 0,6 | 2 | 1 | 21 | 2001 |
| 13,2 | 13,7 | 0,6 | 2 | 1 | 19 | 2006 |
| 13,2 | 13,7 | 0,6 | 2 | 1 | 24 | 2006 |
| 13,2 | 13,7 | 0,6 | 2 | 1 | 19 | 2009 |
| 13,2 | 13,7 | 0,6 | 2 | 1 | 19 | 2013 |
| 13,2 | 13,7 | 0,6 | 2 | 1 | 21 | 2013 |

|      |      |     |   |   |    |      |
|------|------|-----|---|---|----|------|
| 13,2 | 13,7 | 0,6 | 2 | 1 | 19 | 2014 |
| 16   | 24,4 | 0,6 | 5 | 1 | 21 | 2000 |
| 16,3 | 25,8 | 0,6 | 6 | 1 | 19 | 2013 |
| 16,3 | 25,8 | 0,6 | 4 | 1 | 20 | 2013 |
| 14,1 | 16,7 | 0,6 | 6 | 1 | 23 | 2008 |
| 14,1 | 16,7 | 0,6 | 4 | 1 | 20 | 2009 |
| 14,1 | 16,7 | 0,6 | 2 | 1 | 21 | 2015 |
| 13,9 | 16   | 0,6 | 2 | 1 | 26 | 2003 |
| 13,9 | 16   | 0,6 | 2 | 1 | 19 | 2014 |
| 20,9 | 54,4 | 0,6 | 5 | 1 | 18 | 2012 |
| 12,8 | 12,5 | 0,6 | 3 | 1 | 19 | 2000 |
| 12,8 | 12,5 | 0,6 | 2 | 1 | 26 | 2006 |
| 12,8 | 12,5 | 0,6 | 2 | 1 | 20 | 2009 |
| 13,1 | 13,4 | 0,6 | 2 | 1 | 21 | 2009 |
| 12   | 10,3 | 0,6 | 2 | 1 | 20 | 2007 |
| 12   | 10,3 | 0,6 | 2 | 1 | 22 | 2007 |
| 12   | 10,3 | 0,6 | 2 | 1 | 23 | 2007 |
| 14,4 | 17,8 | 0,6 | 5 | 1 | 22 | 1999 |
| 14,4 | 17,8 | 0,6 | 3 | 1 | 20 | 2010 |

|      |      |     |   |   |    |      |
|------|------|-----|---|---|----|------|
| 14,4 | 17,8 | 0,6 | 3 | 1 | 20 | 2010 |
| 14,4 | 17,8 | 0,6 | 3 | 1 | 21 | 2014 |
| 14,4 | 17,8 | 0,6 | 3 | 1 | 15 | 2015 |
| 15,5 | 22,2 | 0,6 | 5 | 1 | 18 | 2000 |
| 15,5 | 22,2 | 0,6 | 5 | 1 | 18 | 2007 |
| 15,5 | 22,2 | 0,6 | 6 | 1 | 20 | 2013 |
| 16,4 | 26,3 | 0,6 | 6 | 1 | 19 | 2001 |
| 12,9 | 12,8 | 0,6 | 3 | 1 | 20 | 2007 |
| 12,9 | 12,8 | 0,6 | 2 | 1 | 20 | 2007 |
| 12,9 | 12,8 | 0,6 | 2 | 1 | 19 | 2013 |
| 12,9 | 12,8 | 0,6 | 2 | 1 | 17 | 2014 |
| 13   | 13,1 | 0,6 | 2 | 1 | 21 | 2000 |
| 13   | 13,1 | 0,6 | 2 | 1 | 21 | 2013 |
| 13,6 | 15   | 0,6 | 2 | 1 | 19 | 2001 |
| 17   | 29,3 | 0,6 | 7 | 1 | 18 | 2014 |
| 12,3 | 11,1 | 0,6 | 2 | 1 | 26 | 2006 |
| 12,3 | 11,1 | 0,6 | 2 | 1 | 20 | 2009 |
| 16,1 | 24,9 | 0,6 | 4 | 1 | 20 | 2011 |
| 16,1 | 24,9 | 0,6 | 5 | 1 | 19 | 2012 |

|      |      |     |   |   |    |      |
|------|------|-----|---|---|----|------|
| 16,1 | 24,9 | 0,6 | 4 | 1 | 18 | 2015 |
| 16,9 | 28,8 | 0,6 | 5 | 1 | 20 | 2000 |
| 9,3  | 4,8  | 0,6 | 1 | 1 | 20 | 2004 |
| 15,4 | 21,8 | 0,6 | 3 | 1 | 24 | 2001 |
| 15,4 | 21,8 | 0,6 | 3 | 1 | 21 | 2003 |
| 15,4 | 21,8 | 0,6 | 5 | 1 | 19 | 2006 |
| 15,4 | 21,8 | 0,6 | 5 | 1 | 19 | 2007 |
| 16,7 | 27,8 | 0,6 | 3 | 1 | 15 | 2015 |
| 15,7 | 23,1 | 0,6 | 4 | 1 | 20 | 1999 |
| 15,7 | 23,1 | 0,6 | 4 | 1 | 25 | 2004 |
| 15,7 | 23,1 | 0,6 | 5 | 1 | 20 | 2013 |
| 15,9 | 24   | 0,6 | 4 | 1 | 21 | 2010 |
| 15,9 | 24   | 0,6 | 4 | 1 | 21 | 2010 |
| 14,2 | 17,1 | 0,6 | 3 | 1 | 18 | 1999 |
| 14,2 | 17,1 | 0,6 | 3 | 1 | 23 | 2003 |
| 14,2 | 17,1 | 0,6 | 3 | 1 | 22 | 2005 |
| 14,2 | 17,1 | 0,6 | 3 | 1 | 19 | 2014 |
| 13,8 | 15,7 | 0,6 | 4 | 1 | 23 | 2011 |
| 13,8 | 15,7 | 0,6 | 2 | 1 | 22 | 2013 |

|      |      |     |   |   |    |      |
|------|------|-----|---|---|----|------|
| 13,5 | 14,7 | 0,6 | 4 | 1 | 22 | 2011 |
| 13,5 | 14,7 | 0,6 | 2 | 1 | 21 | 2014 |
| 15,3 | 21,4 | 0,6 | 5 | 1 | 25 | 2004 |
| 14,6 | 18,6 | 0,6 | 3 | 1 | 19 | 2000 |
| 14,6 | 18,6 | 0,6 | 3 | 1 | 23 | 2015 |
| 14   | 16,4 | 0,6 | 3 | 1 | 19 | 1999 |
| 14   | 16,4 | 0,6 | 4 | 1 | 20 | 2006 |
| 14   | 16,4 | 0,6 | 3 | 1 | 18 | 2007 |
| 14   | 16,4 | 0,6 | 5 | 1 | 23 | 2007 |
| 14   | 16,4 | 0,6 | 3 | 1 | 20 | 2008 |
| 14   | 16,4 | 0,6 | 4 | 1 | 20 | 2008 |
| 14   | 16,4 | 0,6 | 3 | 1 | 23 | 2008 |
| 14   | 16,4 | 0,6 | 3 | 1 | 19 | 2014 |
| 14   | 16,4 | 0,6 | 4 | 1 | 19 | 2014 |
| 12,4 | 11,4 | 0,6 | 3 | 1 | 25 | 2004 |
| 12,4 | 11,4 | 0,6 | 2 | 1 | 26 | 2009 |
| 12,4 | 11,4 | 0,6 | 2 | 1 | 22 | 2011 |
| 15,2 | 21   | 0,6 | 3 | 1 | 22 | 2001 |
| 15,2 | 21   | 0,6 | 5 | 1 | 24 | 2001 |

|      |      |     |   |   |    |      |
|------|------|-----|---|---|----|------|
| 15,2 | 21   | 0,6 | 5 | 1 | 20 | 2012 |
| 16,3 | 25,9 | 0,6 | 8 | 1 | 21 | 2001 |
| 14,7 | 19   | 0,6 | 3 | 1 | 18 | 2001 |
| 14,7 | 19   | 0,6 | 2 | 1 | 24 | 2001 |
| 14,7 | 19   | 0,6 | 4 | 1 | 21 | 2011 |
| 16   | 24,5 | 0,6 | 4 | 1 | 23 | 2007 |
| 16   | 24,5 | 0,6 | 4 | 1 | 17 | 2012 |
| 15,8 | 23,6 | 0,6 | 3 | 1 | 20 | 2003 |
| 14,8 | 19,4 | 0,6 | 5 | 1 | 20 | 2001 |
| 14,8 | 19,4 | 0,6 | 4 | 1 | 23 | 2005 |
| 14,8 | 19,4 | 0,6 | 4 | 1 | 21 | 2015 |
| 14,3 | 17,5 | 0,6 | 3 | 1 | 19 | 2000 |
| 14,3 | 17,5 | 0,6 | 3 | 1 | 15 | 2015 |
| 13,4 | 14,4 | 0,6 | 2 | 1 | 20 | 2002 |
| 13,4 | 14,4 | 0,6 | 2 | 1 | 20 | 2002 |
| 13,4 | 14,4 | 0,6 | 3 | 1 | 21 | 2008 |
| 13,4 | 14,4 | 0,6 | 2 | 1 | 24 | 2009 |
| 13,4 | 14,4 | 0,6 | 2 | 1 | 19 | 2014 |
| 15   | 20,2 | 0,6 | 3 | 1 | 23 | 2003 |

|      |      |     |   |   |    |      |
|------|------|-----|---|---|----|------|
| 15   | 20,2 | 0,6 | 4 | 1 | 19 | 2004 |
| 15   | 20,2 | 0,6 | 4 | 1 | 22 | 2011 |
| 15   | 20,2 | 0,6 | 3 | 1 | 19 | 2014 |
| 15   | 20,2 | 0,6 | 4 | 1 | 18 | 2015 |
| 14,9 | 19,8 | 0,6 | 5 | 1 | 24 | 2006 |
| 14,9 | 19,8 | 0,6 | 4 | 1 | 24 | 2006 |
| 16,9 | 28,9 | 0,6 | 7 | 1 | 18 | 2014 |
| 15,5 | 22,3 | 0,6 | 3 | 1 | 21 | 2003 |
| 15,5 | 22,3 | 0,6 | 5 | 1 | 19 | 2007 |
| 13,7 | 15,4 | 0,6 | 2 | 1 | 25 | 2002 |
| 13,7 | 15,4 | 0,6 | 2 | 1 | 24 | 2009 |
| 13,7 | 15,4 | 0,6 | 2 | 1 | 23 | 2011 |
| 16,7 | 27,9 | 0,6 | 4 | 1 | 18 | 2002 |
| 16,7 | 27,9 | 0,6 | 7 | 1 | 24 | 2009 |
| 12,5 | 11,7 | 0,6 | 2 | 1 | 23 | 2006 |
| 16,1 | 25   | 0,6 | 5 | 1 | 23 | 2001 |
| 16,1 | 25   | 0,6 | 5 | 1 | 21 | 2006 |
| 16,1 | 25   | 0,6 | 5 | 1 | 19 | 2007 |
| 14,1 | 16,8 | 0,6 | 4 | 1 | 23 | 2011 |

|      |      |     |   |   |    |      |
|------|------|-----|---|---|----|------|
| 14,1 | 16,8 | 0,6 | 4 | 1 | 23 | 2011 |
| 14,1 | 16,8 | 0,6 | 2 | 1 | 19 | 2014 |
| 13,3 | 14,1 | 0,6 | 2 | 1 | 20 | 2000 |
| 13,3 | 14,1 | 0,6 | 2 | 1 | 20 | 2002 |
| 13,3 | 14,1 | 0,6 | 3 | 1 | 21 | 2005 |
| 13,3 | 14,1 | 0,6 | 3 | 1 | 21 | 2008 |
| 13,3 | 14,1 | 0,6 | 2 | 1 | 26 | 2009 |
| 13,3 | 14,1 | 0,6 | 2 | 1 | 23 | 2010 |
| 13,3 | 14,1 | 0,6 | 2 | 1 | 23 | 2010 |
| 11,7 | 9,6  | 0,6 | 2 | 1 | 20 | 2004 |
| 11,7 | 9,6  | 0,6 | 3 | 1 | 25 | 2004 |
| 17,2 | 30,5 | 0,6 | 4 | 1 | 17 | 2012 |
| 14,4 | 17,9 | 0,6 | 5 | 1 | 26 | 1999 |
| 14,4 | 17,9 | 0,6 | 3 | 1 | 24 | 2001 |
| 14,4 | 17,9 | 0,6 | 3 | 1 | 15 | 2015 |
| 13,9 | 16,1 | 0,6 | 3 | 1 | 19 | 2014 |
| 15,7 | 23,2 | 0,6 | 4 | 1 | 19 | 2013 |
| 15,7 | 23,2 | 0,6 | 3 | 1 | 20 | 2013 |
| 15,7 | 23,2 | 0,6 | 4 | 1 | 15 | 2015 |

|      |      |     |   |   |    |      |
|------|------|-----|---|---|----|------|
| 15,9 | 24,1 | 0,6 | 4 | 1 | 20 | 2006 |
| 15,9 | 24,1 | 0,6 | 7 | 1 | 20 | 2011 |
| 15,4 | 21,9 | 0,6 | 4 | 1 | 18 | 1999 |
| 15,4 | 21,9 | 0,6 | 4 | 1 | 18 | 2015 |
| 15,4 | 21,9 | 0,6 | 4 | 1 | 18 | 2015 |
| 16,2 | 25,5 | 0,6 | 4 | 1 | 17 | 2014 |
| 17,4 | 31,6 | 0,6 | 5 | 1 | 19 | 2002 |
| 12,6 | 12   | 0,6 | 2 | 1 | 23 | 2010 |
| 12,6 | 12   | 0,6 | 2 | 1 | 23 | 2010 |
| 19,1 | 41,8 | 0,6 | 5 | 1 | 18 | 2012 |
| 13,2 | 13,8 | 0,6 | 2 | 1 | 22 | 2001 |
| 13,2 | 13,8 | 0,6 | 2 | 1 | 23 | 2002 |
| 13,2 | 13,8 | 0,6 | 2 | 1 | 18 | 2008 |
| 13,2 | 13,8 | 0,6 | 2 | 1 | 23 | 2009 |
| 13,2 | 13,8 | 0,6 | 2 | 1 | 22 | 2011 |
| 13,2 | 13,8 | 0,6 | 2 | 1 | 19 | 2014 |
| 18   | 35   | 0,6 | 6 | 1 | 19 | 2013 |
| 13,6 | 15,1 | 0,6 | 5 | 1 | 20 | 2000 |
| 13,6 | 15,1 | 0,6 | 3 | 1 | 19 | 2010 |

|      |      |     |   |   |    |      |
|------|------|-----|---|---|----|------|
| 13,6 | 15,1 | 0,6 | 3 | 1 | 19 | 2010 |
| 13,6 | 15,1 | 0,6 | 2 | 1 | 19 | 2013 |
| 13,6 | 15,1 | 0,6 | 2 | 1 | 21 | 2013 |
| 15,3 | 21,5 | 0,6 | 5 | 1 | 19 | 1999 |
| 15,3 | 21,5 | 0,6 | 5 | 1 | 19 | 2002 |
| 15,3 | 21,5 | 0,6 | 5 | 1 | 23 | 2005 |
| 15,3 | 21,5 | 0,6 | 7 | 1 | 19 | 2006 |
| 16,3 | 26   | 0,6 | 5 | 1 | 18 | 2000 |
| 16,3 | 26   | 0,6 | 4 | 1 | 22 | 2004 |
| 16,3 | 26   | 0,6 | 4 | 1 | 19 | 2013 |
| 19,7 | 45,9 | 0,6 | 5 | 1 | 18 | 2014 |
| 17   | 29,5 | 0,6 | 7 | 1 | 21 | 2014 |
| 12,7 | 12,3 | 0,6 | 2 | 1 | 22 | 2009 |
| 13,1 | 13,5 | 0,6 | 3 | 1 | 21 | 2005 |
| 13,1 | 13,5 | 0,6 | 2 | 1 | 26 | 2006 |
| 13,1 | 13,5 | 0,6 | 4 | 1 | 22 | 2009 |
| 13,1 | 13,5 | 0,6 | 2 | 1 | 17 | 2012 |
| 17,7 | 33,3 | 0,6 | 5 | 1 | 19 | 2010 |
| 17,7 | 33,3 | 0,6 | 5 | 1 | 19 | 2010 |

|      |      |     |   |   |    |      |
|------|------|-----|---|---|----|------|
| 15,6 | 22,8 | 0,6 | 3 | 1 | 20 | 2003 |
| 15,6 | 22,8 | 0,6 | 3 | 1 | 19 | 2010 |
| 15,6 | 22,8 | 0,6 | 3 | 1 | 19 | 2010 |
| 16   | 24,6 | 0,6 | 4 | 1 | 19 | 2001 |
| 16   | 24,6 | 0,6 | 4 | 1 | 20 | 2001 |
| 16   | 24,6 | 0,6 | 5 | 1 | 23 | 2005 |
| 16   | 24,6 | 0,6 | 4 | 1 | 20 | 2013 |
| 17,3 | 31,1 | 0,6 | 4 | 1 | 19 | 2010 |
| 17,3 | 31,1 | 0,6 | 4 | 1 | 19 | 2010 |
| 14,2 | 17,2 | 0,6 | 3 | 1 | 18 | 2008 |
| 14,2 | 17,2 | 0,6 | 3 | 1 | 23 | 2008 |
| 14,2 | 17,2 | 0,6 | 3 | 1 | 19 | 2010 |
| 14,2 | 17,2 | 0,6 | 5 | 1 | 23 | 2010 |
| 14,2 | 17,2 | 0,6 | 3 | 1 | 19 | 2010 |
| 14,2 | 17,2 | 0,6 | 5 | 1 | 23 | 2010 |
| 14,2 | 17,2 | 0,6 | 3 | 1 | 18 | 2014 |
| 14,2 | 17,2 | 0,6 | 4 | 1 | 19 | 2015 |
| 11,4 | 8,9  | 0,6 | 2 | 1 | 20 | 2004 |
| 16,4 | 26,5 | 0,6 | 5 | 1 | 26 | 2003 |

|      |      |     |   |   |    |      |
|------|------|-----|---|---|----|------|
| 16,4 | 26,5 | 0,6 | 7 | 1 | 19 | 2009 |
| 12,8 | 12,6 | 0,6 | 2 | 1 | 18 | 2002 |
| 12,8 | 12,6 | 0,6 | 2 | 1 | 26 | 2006 |
| 12,8 | 12,6 | 0,6 | 2 | 1 | 19 | 2013 |
| 12,8 | 12,6 | 0,6 | 2 | 1 | 21 | 2014 |
| 13   | 13,2 | 0,6 | 2 | 1 | 26 | 2006 |
| 13   | 13,2 | 0,6 | 5 | 1 | 23 | 2007 |
| 13   | 13,2 | 0,6 | 2 | 1 | 22 | 2009 |
| 13   | 13,2 | 0,6 | 2 | 1 | 23 | 2009 |
| 13   | 13,2 | 0,6 | 2 | 1 | 23 | 2011 |
| 13   | 13,2 | 0,6 | 2 | 1 | 19 | 2013 |
| 15,2 | 21,1 | 0,6 | 4 | 1 | 18 | 2001 |
| 14,6 | 18,7 | 0,6 | 2 | 1 | 24 | 2001 |
| 14,6 | 18,7 | 0,6 | 2 | 1 | 19 | 2012 |
| 14,6 | 18,7 | 0,6 | 3 | 1 | 21 | 2015 |
| 12,9 | 12,9 | 0,6 | 2 | 1 | 24 | 2009 |
| 12,9 | 12,9 | 0,6 | 2 | 1 | 19 | 2013 |
| 16,5 | 27   | 0,6 | 4 | 1 | 15 | 2015 |
| 16,8 | 28,5 | 0,6 | 5 | 1 | 21 | 2010 |

|      |      |     |   |   |    |      |
|------|------|-----|---|---|----|------|
| 16,8 | 28,5 | 0,6 | 5 | 1 | 21 | 2010 |
| 13,8 | 15,8 | 0,6 | 2 | 1 | 20 | 2008 |
| 15,1 | 20,7 | 0,6 | 4 | 1 | 20 | 2006 |
| 15,1 | 20,7 | 0,6 | 6 | 1 | 19 | 2008 |
| 14,7 | 19,1 | 0,6 | 3 | 1 | 18 | 2000 |
| 14   | 16,5 | 0,6 | 2 | 1 | 20 | 2013 |
| 14   | 16,5 | 0,6 | 3 | 1 | 17 | 2014 |
| 14   | 16,5 | 0,6 | 3 | 1 | 19 | 2014 |
| 15   | 20,3 | 0,6 | 3 | 1 | 19 | 2001 |
| 15   | 20,3 | 0,6 | 4 | 1 | 23 | 2006 |
| 15   | 20,3 | 0,6 | 4 | 1 | 18 | 2008 |
| 15   | 20,3 | 0,6 | 4 | 1 | 15 | 2015 |
| 14,8 | 19,5 | 0,6 | 4 | 1 | 20 | 2001 |
| 14,8 | 19,5 | 0,6 | 5 | 1 | 19 | 2009 |
| 14,8 | 19,5 | 0,6 | 5 | 1 | 19 | 2009 |
| 14,8 | 19,5 | 0,6 | 4 | 1 | 20 | 2011 |
| 15,5 | 22,4 | 0,6 | 3 | 1 | 22 | 2003 |
| 15,5 | 22,4 | 0,6 | 3 | 1 | 19 | 2015 |
| 13,5 | 14,8 | 0,6 | 2 | 1 | 22 | 2000 |

|      |      |     |   |   |    |      |
|------|------|-----|---|---|----|------|
| 13,5 | 14,8 | 0,6 | 4 | 1 | 23 | 2006 |
| 13,5 | 14,8 | 0,6 | 2 | 1 | 22 | 2009 |
| 13,5 | 14,8 | 0,6 | 2 | 1 | 19 | 2013 |
| 13,5 | 14,8 | 0,6 | 2 | 1 | 18 | 2014 |
| 13,5 | 14,8 | 0,6 | 2 | 1 | 21 | 2014 |
| 13,5 | 14,8 | 0,6 | 2 | 1 | 23 | 2014 |
| 13,5 | 14,8 | 0,6 | 3 | 1 | 18 | 2015 |
| 14,9 | 19,9 | 0,6 | 5 | 1 | 18 | 2000 |
| 14,9 | 19,9 | 0,6 | 4 | 1 | 26 | 2003 |
| 14,9 | 19,9 | 0,6 | 4 | 1 | 20 | 2012 |
| 12,3 | 11,2 | 0,6 | 2 | 1 | 21 | 2009 |
| 14,3 | 17,6 | 0,6 | 3 | 1 | 18 | 1999 |
| 14,3 | 17,6 | 0,6 | 3 | 1 | 19 | 2001 |
| 14,3 | 17,6 | 0,6 | 3 | 1 | 18 | 2008 |
| 14,3 | 17,6 | 0,6 | 4 | 1 | 22 | 2011 |
| 14,3 | 17,6 | 0,6 | 3 | 1 | 19 | 2012 |
| 14,3 | 17,6 | 0,6 | 3 | 1 | 18 | 2015 |
| 15,9 | 24,2 | 0,6 | 5 | 1 | 26 | 2001 |
| 18,1 | 35,7 | 0,6 | 4 | 1 | 15 | 2015 |

|      |      |     |   |   |    |      |
|------|------|-----|---|---|----|------|
| 15,7 | 23,3 | 0,6 | 4 | 1 | 22 | 2003 |
| 15,7 | 23,3 | 0,6 | 5 | 1 | 19 | 2010 |
| 15,7 | 23,3 | 0,6 | 5 | 1 | 19 | 2010 |
| 16,2 | 25,6 | 0,6 | 6 | 1 | 26 | 2003 |
| 20,8 | 54,2 | 0,6 | 8 | 1 | 18 | 2012 |
| 17,7 | 33,4 | 0,6 | 4 | 1 | 19 | 2013 |
| 15,4 | 22   | 0,6 | 4 | 1 | 17 | 2012 |
| 13,4 | 14,5 | 0,6 | 3 | 1 | 24 | 2001 |
| 13,4 | 14,5 | 0,6 | 3 | 1 | 21 | 2003 |
| 19,9 | 47,5 | 0,6 | 6 | 1 | 18 | 2012 |
| 13,7 | 15,5 | 0,6 | 3 | 1 | 20 | 2004 |
| 14,4 | 18   | 0,6 | 3 | 1 | 18 | 2012 |
| 14,1 | 16,9 | 0,6 | 3 | 1 | 26 | 1999 |
| 14,1 | 16,9 | 0,6 | 2 | 1 | 26 | 2001 |
| 14,1 | 16,9 | 0,6 | 4 | 1 | 21 | 2006 |
| 14,1 | 16,9 | 0,6 | 3 | 1 | 18 | 2014 |
| 14,1 | 16,9 | 0,6 | 3 | 1 | 22 | 2015 |
| 18,6 | 38,8 | 0,6 | 7 | 1 | 19 | 2000 |
| 16   | 24,7 | 0,6 | 4 | 1 | 21 | 1999 |

|      |      |     |   |   |    |      |
|------|------|-----|---|---|----|------|
| 16   | 24,7 | 0,6 | 6 | 1 | 24 | 2001 |
| 16,4 | 26,6 | 0,6 | 5 | 1 | 23 | 2004 |
| 15,3 | 21,6 | 0,6 | 3 | 1 | 18 | 2001 |
| 15,3 | 21,6 | 0,6 | 4 | 1 | 20 | 2001 |
| 15,3 | 21,6 | 0,6 | 4 | 1 | 25 | 2003 |
| 12,4 | 11,5 | 0,6 | 1 | 1 | 26 | 2001 |
| 12,4 | 11,5 | 0,6 | 3 | 1 | 25 | 2004 |
| 12,4 | 11,5 | 0,6 | 2 | 1 | 18 | 2014 |
| 15,6 | 22,9 | 0,6 | 4 | 1 | 23 | 2003 |
| 15,6 | 22,9 | 0,6 | 5 | 1 | 23 | 2011 |
| 13,9 | 16,2 | 0,6 | 3 | 1 | 23 | 2007 |
| 13,9 | 16,2 | 0,6 | 3 | 1 | 17 | 2008 |
| 17,2 | 30,7 | 0,6 | 4 | 1 | 16 | 2015 |
| 16,7 | 28,1 | 0,6 | 5 | 1 | 20 | 2011 |
| 16,6 | 27,6 | 0,6 | 9 | 1 | 19 | 2014 |
| 14,5 | 18,4 | 0,6 | 3 | 1 | 18 | 2015 |
| 13,3 | 14,2 | 0,6 | 2 | 1 | 26 | 2001 |
| 13,3 | 14,2 | 0,6 | 3 | 1 | 20 | 2002 |
| 13,3 | 14,2 | 0,6 | 3 | 1 | 21 | 2011 |

|      |      |     |   |   |    |      |
|------|------|-----|---|---|----|------|
| 13,3 | 14,2 | 0,6 | 3 | 1 | 22 | 2011 |
| 15,2 | 21,2 | 0,6 | 4 | 1 | 20 | 1999 |
| 15,2 | 21,2 | 0,6 | 3 | 1 | 21 | 2001 |
| 15,2 | 21,2 | 0,6 | 3 | 1 | 26 | 2001 |
| 15,2 | 21,2 | 0,6 | 3 | 1 | 23 | 2002 |
| 15,2 | 21,2 | 0,6 | 8 | 1 | 26 | 2005 |
| 12,1 | 10,7 | 0,6 | 2 | 1 | 20 | 2007 |
| 14,6 | 18,8 | 0,6 | 3 | 1 | 23 | 2006 |
| 17,7 | 33,5 | 0,6 | 6 | 1 | 20 | 2010 |
| 17,7 | 33,5 | 0,6 | 6 | 1 | 20 | 2010 |
| 15,1 | 20,8 | 0,6 | 4 | 1 | 20 | 1999 |
| 15,1 | 20,8 | 0,6 | 3 | 1 | 20 | 2003 |
| 15,1 | 20,8 | 0,6 | 4 | 1 | 23 | 2007 |
| 12,5 | 11,8 | 0,6 | 2 | 1 | 22 | 2005 |
| 14,2 | 17,3 | 0,6 | 3 | 1 | 18 | 2002 |
| 14,2 | 17,3 | 0,6 | 4 | 1 | 23 | 2009 |
| 14,2 | 17,3 | 0,6 | 3 | 1 | 22 | 2011 |
| 14,2 | 17,3 | 0,6 | 3 | 1 | 16 | 2015 |
| 15,5 | 22,5 | 0,6 | 4 | 1 | 21 | 2005 |

|      |      |     |   |   |    |      |
|------|------|-----|---|---|----|------|
| 15,5 | 22,5 | 0,6 | 5 | 1 | 19 | 2010 |
| 15,5 | 22,5 | 0,6 | 5 | 1 | 19 | 2010 |
| 15,5 | 22,5 | 0,6 | 5 | 1 | 19 | 2012 |
| 13,6 | 15,2 | 0,6 | 3 | 1 | 22 | 1999 |
| 13,6 | 15,2 | 0,6 | 2 | 1 | 20 | 2000 |
| 13,6 | 15,2 | 0,6 | 8 | 1 | 26 | 2001 |
| 13,6 | 15,2 | 0,6 | 5 | 1 | 20 | 2006 |
| 13,2 | 13,9 | 0,6 | 2 | 1 | 20 | 2002 |
| 13,2 | 13,9 | 0,6 | 3 | 1 | 19 | 2008 |
| 13,2 | 13,9 | 0,6 | 3 | 1 | 19 | 2009 |
| 13,2 | 13,9 | 0,6 | 2 | 1 | 19 | 2013 |
| 14,7 | 19,2 | 0,6 | 5 | 1 | 21 | 2000 |
| 14,7 | 19,2 | 0,6 | 3 | 1 | 24 | 2002 |
| 14,7 | 19,2 | 0,6 | 3 | 1 | 25 | 2004 |
| 14,7 | 19,2 | 0,6 | 3 | 1 | 18 | 2014 |
| 14,7 | 19,2 | 0,6 | 3 | 1 | 19 | 2014 |
| 14,7 | 19,2 | 0,6 | 3 | 1 | 15 | 2015 |
| 15   | 20,4 | 0,6 | 5 | 1 | 18 | 2000 |
| 15   | 20,4 | 0,6 | 4 | 1 | 19 | 2006 |

|      |      |     |   |   |    |      |
|------|------|-----|---|---|----|------|
| 15   | 20,4 | 0,6 | 3 | 1 | 20 | 2013 |
| 15   | 20,4 | 0,6 | 3 | 1 | 19 | 2014 |
| 15   | 20,4 | 0,6 | 5 | 1 | 19 | 2014 |
| 15   | 20,4 | 0,6 | 3 | 1 | 18 | 2015 |
| 15   | 20,4 | 0,6 | 3 | 1 | 19 | 2015 |
| 17,3 | 31,3 | 0,6 | 4 | 1 | 18 | 2012 |
| 15,9 | 24,3 | 0,6 | 6 | 1 | 17 | 2008 |
| 15,9 | 24,3 | 0,6 | 4 | 1 | 19 | 2012 |
| 14,8 | 19,6 | 0,6 | 5 | 1 | 18 | 2007 |
| 14,8 | 19,6 | 0,6 | 3 | 1 | 21 | 2008 |
| 15,7 | 23,4 | 0,6 | 4 | 1 | 23 | 2001 |
| 15,7 | 23,4 | 0,6 | 4 | 1 | 26 | 2005 |
| 15,7 | 23,4 | 0,6 | 7 | 1 | 22 | 2007 |
| 15,7 | 23,4 | 0,6 | 3 | 1 | 17 | 2008 |
| 15,7 | 23,4 | 0,6 | 5 | 1 | 19 | 2012 |
| 15,7 | 23,4 | 0,6 | 4 | 1 | 19 | 2012 |
| 15,7 | 23,4 | 0,6 | 4 | 1 | 18 | 2015 |
| 12,6 | 12,1 | 0,6 | 3 | 1 | 22 | 2005 |
| 14   | 16,6 | 0,6 | 2 | 1 | 19 | 2002 |

|      |      |     |   |   |    |      |
|------|------|-----|---|---|----|------|
| 14   | 16,6 | 0,6 | 5 | 1 | 20 | 2007 |
| 14   | 16,6 | 0,6 | 3 | 1 | 21 | 2008 |
| 14   | 16,6 | 0,6 | 3 | 1 | 16 | 2015 |
| 13,1 | 13,6 | 0,6 | 3 | 1 | 21 | 2006 |
| 13,1 | 13,6 | 0,6 | 2 | 1 | 26 | 2009 |
| 13,1 | 13,6 | 0,6 | 2 | 1 | 17 | 2014 |
| 16,3 | 26,2 | 0,6 | 4 | 1 | 22 | 2001 |
| 16,3 | 26,2 | 0,6 | 8 | 1 | 20 | 2013 |
| 18,8 | 40,2 | 0,6 | 6 | 1 | 18 | 2015 |
| 13,8 | 15,9 | 0,6 | 3 | 1 | 26 | 2003 |
| 13,8 | 15,9 | 0,6 | 5 | 1 | 25 | 2007 |
| 13,8 | 15,9 | 0,6 | 4 | 1 | 20 | 2013 |
| 11,2 | 8,5  | 0,6 | 2 | 1 | 25 | 2004 |
| 15,4 | 22,1 | 0,6 | 3 | 1 | 18 | 2015 |
| 16,8 | 28,7 | 0,6 | 4 | 1 | 20 | 2000 |
| 16,8 | 28,7 | 0,6 | 3 | 1 | 18 | 2002 |
| 16,8 | 28,7 | 0,6 | 4 | 1 | 24 | 2006 |
| 14,3 | 17,7 | 0,6 | 2 | 1 | 19 | 2001 |
| 14,3 | 17,7 | 0,6 | 3 | 1 | 18 | 2002 |

|      |      |     |   |   |    |      |
|------|------|-----|---|---|----|------|
| 14,3 | 17,7 | 0,6 | 7 | 1 | 19 | 2009 |
| 14,3 | 17,7 | 0,6 | 3 | 1 | 23 | 2010 |
| 14,3 | 17,7 | 0,6 | 5 | 1 | 23 | 2010 |
| 14,3 | 17,7 | 0,6 | 3 | 1 | 23 | 2010 |
| 14,3 | 17,7 | 0,6 | 5 | 1 | 23 | 2010 |
| 14,3 | 17,7 | 0,6 | 3 | 1 | 19 | 2011 |
| 17,6 | 33   | 0,6 | 5 | 1 | 20 | 2010 |
| 17,6 | 33   | 0,6 | 5 | 1 | 20 | 2010 |
| 12,7 | 12,4 | 0,6 | 3 | 1 | 21 | 2005 |
| 12,7 | 12,4 | 0,6 | 2 | 1 | 20 | 2009 |
| 12,7 | 12,4 | 0,6 | 2 | 1 | 23 | 2009 |
| 13   | 13,3 | 0,6 | 2 | 1 | 24 | 2001 |
| 13   | 13,3 | 0,6 | 2 | 1 | 23 | 2007 |
| 13   | 13,3 | 0,6 | 2 | 1 | 22 | 2009 |
| 13   | 13,3 | 0,6 | 2 | 1 | 26 | 2009 |
| 13   | 13,3 | 0,6 | 3 | 1 | 21 | 2011 |
| 13   | 13,3 | 0,6 | 2 | 1 | 17 | 2014 |
| 13   | 13,3 | 0,6 | 2 | 1 | 18 | 2014 |
| 13   | 13,3 | 0,6 | 3 | 1 | 19 | 2014 |

|      |      |     |   |   |    |      |
|------|------|-----|---|---|----|------|
| 16,7 | 28,2 | 0,6 | 5 | 1 | 15 | 2015 |
| 17,4 | 31,9 | 0,6 | 5 | 1 | 18 | 2000 |
| 16,6 | 27,7 | 0,6 | 6 | 1 | 16 | 2015 |
| 12,9 | 13   | 0,6 | 2 | 1 | 17 | 2014 |
| 13,5 | 14,9 | 0,6 | 3 | 1 | 21 | 2000 |
| 13,5 | 14,9 | 0,6 | 2 | 1 | 20 | 2002 |
| 13,5 | 14,9 | 0,6 | 3 | 1 | 23 | 2004 |
| 13,5 | 14,9 | 0,6 | 2 | 1 | 21 | 2005 |
| 13,5 | 14,9 | 0,6 | 2 | 1 | 18 | 2008 |
| 11,7 | 9,7  | 0,6 | 2 | 1 | 25 | 2004 |
| 12,2 | 11   | 0,6 | 2 | 1 | 19 | 2006 |
| 15,6 | 23   | 0,6 | 4 | 1 | 15 | 2015 |
| 15,3 | 21,7 | 0,6 | 4 | 1 | 19 | 2001 |
| 15,3 | 21,7 | 0,6 | 3 | 1 | 20 | 2007 |
| 15,8 | 23,9 | 0,6 | 5 | 1 | 20 | 1999 |
| 15,8 | 23,9 | 0,6 | 6 | 1 | 17 | 2008 |
| 14,4 | 18,1 | 0,6 | 3 | 1 | 21 | 2003 |
| 14,4 | 18,1 | 0,6 | 2 | 1 | 24 | 2009 |
| 14,4 | 18,1 | 0,6 | 4 | 1 | 24 | 2009 |

|      |      |     |   |   |    |      |
|------|------|-----|---|---|----|------|
| 16,1 | 25,3 | 0,6 | 3 | 1 | 22 | 2003 |
| 17,8 | 34,2 | 0,6 | 9 | 1 | 24 | 2006 |
| 14,1 | 17   | 0,6 | 2 | 1 | 18 | 2000 |
| 14,1 | 17   | 0,6 | 5 | 1 | 20 | 2000 |
| 14,1 | 17   | 0,6 | 3 | 1 | 21 | 2011 |
| 14,1 | 17   | 0,6 | 3 | 1 | 15 | 2015 |
| 14,1 | 17   | 0,6 | 3 | 1 | 23 | 2015 |
| 15,2 | 21,3 | 0,6 | 3 | 1 | 19 | 2000 |
| 15,2 | 21,3 | 0,6 | 3 | 1 | 25 | 2003 |
| 15,2 | 21,3 | 0,6 | 3 | 1 | 21 | 2010 |
| 15,2 | 21,3 | 0,6 | 3 | 1 | 21 | 2010 |
| 17   | 29,8 | 0,6 | 4 | 1 | 19 | 2015 |
| 13,7 | 15,6 | 0,6 | 2 | 1 | 22 | 1999 |
| 13,4 | 14,6 | 0,6 | 2 | 1 | 20 | 2000 |
| 14,5 | 18,5 | 0,6 | 3 | 1 | 22 | 2001 |
| 14,5 | 18,5 | 0,6 | 2 | 1 | 24 | 2001 |
| 14,5 | 18,5 | 0,6 | 4 | 1 | 19 | 2009 |
| 14,5 | 18,5 | 0,6 | 4 | 1 | 21 | 2009 |
| 14,5 | 18,5 | 0,6 | 3 | 1 | 18 | 2014 |

|      |      |     |    |   |    |      |
|------|------|-----|----|---|----|------|
| 15,5 | 22,6 | 0,6 | 5  | 1 | 23 | 2010 |
| 15,5 | 22,6 | 0,6 | 5  | 1 | 23 | 2010 |
| 13,9 | 16,3 | 0,6 | 3  | 1 | 24 | 2001 |
| 13,9 | 16,3 | 0,6 | 3  | 1 | 20 | 2008 |
| 15,9 | 24,4 | 0,6 | 4  | 1 | 20 | 2001 |
| 15,1 | 20,9 | 0,6 | 5  | 1 | 21 | 1999 |
| 15,1 | 20,9 | 0,6 | 4  | 1 | 22 | 2007 |
| 15,1 | 20,9 | 0,6 | 6  | 1 | 25 | 2007 |
| 15,1 | 20,9 | 0,6 | 3  | 1 | 20 | 2012 |
| 15,7 | 23,5 | 0,6 | 5  | 1 | 24 | 2001 |
| 15,7 | 23,5 | 0,6 | 10 | 1 | 18 | 2015 |
| 16,3 | 26,3 | 0,6 | 6  | 1 | 23 | 2003 |
| 14,6 | 18,9 | 0,6 | 4  | 1 | 26 | 1999 |
| 14,6 | 18,9 | 0,6 | 3  | 1 | 17 | 2008 |
| 14,6 | 18,9 | 0,6 | 4  | 1 | 19 | 2012 |
| 16,8 | 28,8 | 0,6 | 6  | 1 | 19 | 2013 |
| 15   | 20,5 | 0,6 | 4  | 1 | 18 | 2000 |
| 15   | 20,5 | 0,6 | 4  | 1 | 26 | 2003 |
| 15   | 20,5 | 0,6 | 6  | 1 | 23 | 2005 |

|      |      |     |   |   |    |      |
|------|------|-----|---|---|----|------|
| 15   | 20,5 | 0,6 | 5 | 1 | 19 | 2006 |
| 15   | 20,5 | 0,6 | 3 | 1 | 19 | 2008 |
| 15   | 20,5 | 0,6 | 4 | 1 | 21 | 2011 |
| 15   | 20,5 | 0,6 | 4 | 1 | 19 | 2011 |
| 17,4 | 32   | 0,6 | 6 | 1 | 21 | 2015 |
| 11,4 | 9    | 0,6 | 2 | 1 | 20 | 2004 |
| 11,4 | 9    | 0,6 | 2 | 1 | 25 | 2004 |
| 20   | 48,6 | 0,6 | 5 | 1 | 15 | 2015 |
| 14,7 | 19,3 | 0,6 | 3 | 1 | 19 | 2000 |
| 14,7 | 19,3 | 0,6 | 3 | 1 | 19 | 2001 |
| 14,7 | 19,3 | 0,6 | 3 | 1 | 21 | 2010 |
| 14,7 | 19,3 | 0,6 | 3 | 1 | 21 | 2010 |
| 14,7 | 19,3 | 0,6 | 4 | 1 | 15 | 2015 |
| 14,9 | 20,1 | 0,6 | 3 | 1 | 21 | 2000 |
| 14,9 | 20,1 | 0,6 | 5 | 1 | 19 | 2013 |
| 12   | 10,5 | 0,6 | 2 | 1 | 26 | 2006 |
| 12   | 10,5 | 0,6 | 2 | 1 | 20 | 2007 |
| 12   | 10,5 | 0,6 | 2 | 1 | 19 | 2009 |
| 14,8 | 19,7 | 0,6 | 3 | 1 | 26 | 2006 |

|      |      |     |   |   |    |      |
|------|------|-----|---|---|----|------|
| 14,8 | 19,7 | 0,6 | 4 | 1 | 23 | 2008 |
| 14,8 | 19,7 | 0,6 | 2 | 1 | 22 | 2009 |
| 14,8 | 19,7 | 0,6 | 7 | 1 | 23 | 2009 |
| 14,2 | 17,4 | 0,6 | 4 | 1 | 21 | 2006 |
| 14,2 | 17,4 | 0,6 | 3 | 1 | 19 | 2014 |
| 17,7 | 33,7 | 0,6 | 4 | 1 | 19 | 2012 |
| 13,3 | 14,3 | 0,6 | 2 | 1 | 23 | 2003 |
| 13,3 | 14,3 | 0,6 | 2 | 1 | 25 | 2003 |
| 15,4 | 22,2 | 0,6 | 4 | 1 | 22 | 1999 |
| 16   | 24,9 | 0,6 | 2 | 1 | 19 | 2013 |
| 13,6 | 15,3 | 0,6 | 3 | 1 | 22 | 1999 |
| 13,6 | 15,3 | 0,6 | 3 | 1 | 26 | 2003 |
| 17,3 | 31,5 | 0,6 | 6 | 1 | 24 | 2001 |
| 12,4 | 11,6 | 0,6 | 3 | 1 | 21 | 2005 |
| 12,4 | 11,6 | 0,6 | 2 | 1 | 19 | 2006 |
| 15,6 | 23,1 | 0,6 | 4 | 1 | 17 | 2002 |
| 15,6 | 23,1 | 0,6 | 5 | 1 | 21 | 2003 |
| 15,8 | 24   | 0,6 | 3 | 1 | 20 | 2003 |
| 15,8 | 24   | 0,6 | 5 | 1 | 19 | 2012 |

|      |      |     |   |   |    |      |
|------|------|-----|---|---|----|------|
| 17,9 | 34,9 | 0,6 | 4 | 1 | 19 | 2013 |
| 17   | 29,9 | 0,6 | 5 | 1 | 20 | 2013 |
| 14   | 16,7 | 0,6 | 4 | 1 | 23 | 1999 |
| 14   | 16,7 | 0,6 | 2 | 1 | 19 | 2000 |
| 14   | 16,7 | 0,6 | 3 | 1 | 25 | 2003 |
| 14   | 16,7 | 0,6 | 3 | 1 | 19 | 2005 |
| 14   | 16,7 | 0,6 | 5 | 1 | 18 | 2007 |
| 14   | 16,7 | 0,6 | 3 | 1 | 19 | 2008 |
| 14   | 16,7 | 0,6 | 3 | 1 | 21 | 2008 |
| 14   | 16,7 | 0,6 | 4 | 1 | 20 | 2011 |
| 14   | 16,7 | 0,6 | 2 | 1 | 19 | 2012 |
| 14   | 16,7 | 0,6 | 3 | 1 | 18 | 2015 |
| 11,6 | 9,5  | 0,6 | 2 | 1 | 20 | 2007 |
| 16,1 | 25,4 | 0,6 | 3 | 1 | 17 | 2014 |
| 15,3 | 21,8 | 0,6 | 4 | 1 | 21 | 1999 |
| 15,3 | 21,8 | 0,6 | 3 | 1 | 18 | 2000 |
| 15,3 | 21,8 | 0,6 | 3 | 1 | 19 | 2002 |
| 15,3 | 21,8 | 0,6 | 3 | 1 | 22 | 2003 |
| 15,3 | 21,8 | 0,6 | 4 | 1 | 20 | 2009 |

|      |      |     |    |   |    |      |
|------|------|-----|----|---|----|------|
| 13,2 | 14   | 0,6 | 5  | 1 | 23 | 2007 |
| 13,2 | 14   | 0,6 | 2  | 1 | 20 | 2009 |
| 13,2 | 14   | 0,6 | 2  | 1 | 24 | 2009 |
| 13,2 | 14   | 0,6 | 2  | 1 | 24 | 2009 |
| 14,3 | 17,8 | 0,6 | 5  | 1 | 27 | 1999 |
| 14,3 | 17,8 | 0,6 | 2  | 1 | 18 | 2000 |
| 14,3 | 17,8 | 0,6 | 2  | 1 | 23 | 2001 |
| 14,3 | 17,8 | 0,6 | 3  | 1 | 22 | 2003 |
| 14,3 | 17,8 | 0,6 | 4  | 1 | 23 | 2009 |
| 13,8 | 16   | 0,6 | 3  | 1 | 18 | 2002 |
| 13,8 | 16   | 0,6 | 3  | 1 | 26 | 2003 |
| 16,2 | 25,9 | 0,6 | 5  | 1 | 19 | 2012 |
| 12,5 | 11,9 | 0,6 | 2  | 1 | 19 | 2014 |
| 17,4 | 32,1 | 0,6 | 10 | 1 | 22 | 2015 |
| 15,2 | 21,4 | 0,6 | 3  | 1 | 24 | 2002 |
| 15,2 | 21,4 | 0,6 | 3  | 1 | 21 | 2003 |
| 15,2 | 21,4 | 0,6 | 5  | 1 | 22 | 2005 |
| 13,1 | 13,7 | 0,6 | 2  | 1 | 21 | 2000 |
| 13,1 | 13,7 | 0,6 | 2  | 1 | 21 | 2006 |

|      |      |     |   |   |    |      |
|------|------|-----|---|---|----|------|
| 13,1 | 13,7 | 0,6 | 2 | 1 | 24 | 2006 |
| 13,1 | 13,7 | 0,6 | 3 | 1 | 26 | 2006 |
| 13,1 | 13,7 | 0,6 | 3 | 1 | 17 | 2008 |
| 13,1 | 13,7 | 0,6 | 3 | 1 | 20 | 2008 |
| 13,1 | 13,7 | 0,6 | 2 | 1 | 19 | 2013 |
| 13,1 | 13,7 | 0,6 | 2 | 1 | 19 | 2013 |
| 13,1 | 13,7 | 0,6 | 2 | 1 | 20 | 2013 |
| 16,8 | 28,9 | 0,6 | 5 | 1 | 20 | 2000 |
| 16,8 | 28,9 | 0,6 | 6 | 1 | 17 | 2002 |
| 16,8 | 28,9 | 0,6 | 4 | 1 | 22 | 2015 |
| 15,9 | 24,5 | 0,6 | 6 | 1 | 19 | 2007 |
| 14,4 | 18,2 | 0,6 | 6 | 1 | 25 | 1999 |
| 14,4 | 18,2 | 0,6 | 3 | 1 | 18 | 2000 |
| 14,4 | 18,2 | 0,6 | 3 | 1 | 20 | 2000 |
| 14,4 | 18,2 | 0,6 | 2 | 1 | 21 | 2003 |
| 14,4 | 18,2 | 0,6 | 3 | 1 | 26 | 2003 |
| 17,7 | 33,8 | 0,6 | 4 | 1 | 15 | 2015 |
| 15,5 | 22,7 | 0,6 | 4 | 1 | 19 | 1999 |
| 15,5 | 22,7 | 0,6 | 5 | 1 | 20 | 2000 |

|      |      |     |   |   |    |      |
|------|------|-----|---|---|----|------|
| 16,3 | 26,4 | 0,6 | 6 | 1 | 20 | 2013 |
| 12,1 | 10,8 | 0,6 | 2 | 1 | 23 | 2006 |
| 12,1 | 10,8 | 0,6 | 2 | 1 | 26 | 2006 |
| 18,5 | 38,6 | 0,6 | 6 | 1 | 20 | 2013 |
| 13,5 | 15   | 0,6 | 2 | 1 | 19 | 2000 |
| 13,5 | 15   | 0,6 | 3 | 1 | 26 | 2001 |
| 13,5 | 15   | 0,6 | 2 | 1 | 20 | 2002 |
| 13,5 | 15   | 0,6 | 3 | 1 | 25 | 2005 |
| 13,5 | 15   | 0,6 | 4 | 1 | 23 | 2009 |
| 15,7 | 23,6 | 0,6 | 4 | 1 | 18 | 2002 |
| 15,7 | 23,6 | 0,6 | 6 | 1 | 22 | 2003 |
| 15,7 | 23,6 | 0,6 | 5 | 1 | 22 | 2004 |
| 15,7 | 23,6 | 0,6 | 3 | 1 | 19 | 2012 |
| 11,3 | 8,8  | 0,6 | 2 | 1 | 23 | 2004 |
| 12,6 | 12,2 | 0,6 | 2 | 1 | 23 | 2010 |
| 12,6 | 12,2 | 0,6 | 2 | 1 | 23 | 2010 |
| 13   | 13,4 | 0,6 | 2 | 1 | 20 | 2002 |
| 13   | 13,4 | 0,6 | 3 | 1 | 21 | 2005 |
| 13   | 13,4 | 0,6 | 2 | 1 | 19 | 2006 |

|      |      |     |   |   |    |      |
|------|------|-----|---|---|----|------|
| 13   | 13,4 | 0,6 | 2 | 1 | 24 | 2006 |
| 13   | 13,4 | 0,6 | 2 | 1 | 26 | 2006 |
| 13   | 13,4 | 0,6 | 3 | 1 | 20 | 2007 |
| 15,1 | 21   | 0,6 | 3 | 1 | 25 | 2002 |
| 15,1 | 21   | 0,6 | 5 | 1 | 19 | 2009 |
| 15,1 | 21   | 0,6 | 4 | 1 | 22 | 2015 |
| 19,1 | 42,5 | 0,6 | 7 | 1 | 17 | 2012 |
| 16,5 | 27,4 | 0,6 | 4 | 1 | 18 | 2002 |
| 16,5 | 27,4 | 0,6 | 5 | 1 | 19 | 2012 |
| 14,1 | 17,1 | 0,6 | 3 | 1 | 22 | 2005 |
| 14,1 | 17,1 | 0,6 | 4 | 1 | 24 | 2006 |
| 14,1 | 17,1 | 0,6 | 3 | 1 | 23 | 2010 |
| 14,1 | 17,1 | 0,6 | 3 | 1 | 23 | 2010 |
| 14,1 | 17,1 | 0,6 | 4 | 1 | 20 | 2011 |
| 14,1 | 17,1 | 0,6 | 4 | 1 | 21 | 2014 |
| 14,1 | 17,1 | 0,6 | 4 | 1 | 23 | 2014 |
| 14,5 | 18,6 | 0,6 | 3 | 1 | 19 | 2000 |
| 14,5 | 18,6 | 0,6 | 3 | 1 | 19 | 2002 |
| 14,5 | 18,6 | 0,6 | 4 | 1 | 21 | 2005 |

|      |      |     |   |   |    |      |
|------|------|-----|---|---|----|------|
| 14,5 | 18,6 | 0,6 | 5 | 1 | 19 | 2007 |
| 14,5 | 18,6 | 0,6 | 3 | 1 | 15 | 2015 |
| 14,5 | 18,6 | 0,6 | 3 | 1 | 21 | 2015 |
| 12,7 | 12,5 | 0,6 | 2 | 1 | 20 | 2002 |
| 12,7 | 12,5 | 0,6 | 2 | 1 | 23 | 2010 |
| 12,7 | 12,5 | 0,6 | 2 | 1 | 23 | 2010 |
| 12,7 | 12,5 | 0,6 | 2 | 1 | 19 | 2013 |
| 12,9 | 13,1 | 0,6 | 2 | 1 | 21 | 2011 |
| 12,8 | 12,8 | 0,6 | 2 | 1 | 19 | 2000 |
| 12,8 | 12,8 | 0,6 | 3 | 1 | 20 | 2004 |
| 12,8 | 12,8 | 0,6 | 2 | 1 | 20 | 2009 |
| 12,8 | 12,8 | 0,6 | 2 | 1 | 19 | 2013 |
| 12,8 | 12,8 | 0,6 | 3 | 1 | 21 | 2014 |
| 16   | 25   | 0,6 | 5 | 1 | 21 | 1999 |
| 16   | 25   | 0,6 | 4 | 1 | 25 | 2004 |
| 16   | 25   | 0,6 | 5 | 1 | 21 | 2005 |
| 16   | 25   | 0,6 | 4 | 1 | 19 | 2012 |
| 19,2 | 43,2 | 0,6 | 7 | 1 | 18 | 2012 |
| 16   | 25   | 0,6 | 5 | 1 | 20 | 2013 |

|      |      |     |   |   |    |      |
|------|------|-----|---|---|----|------|
| 15   | 20,6 | 0,6 | 4 | 1 | 23 | 1999 |
| 15   | 20,6 | 0,6 | 4 | 1 | 23 | 2007 |
| 15   | 20,6 | 0,6 | 4 | 1 | 25 | 2007 |
| 15   | 20,6 | 0,6 | 3 | 1 | 16 | 2008 |
| 15   | 20,6 | 0,6 | 4 | 1 | 19 | 2009 |
| 15   | 20,6 | 0,6 | 3 | 1 | 18 | 2014 |
| 14,6 | 19   | 0,6 | 8 | 1 | 22 | 2001 |
| 14,6 | 19   | 0,6 | 4 | 1 | 26 | 2009 |
| 14,6 | 19   | 0,6 | 4 | 1 | 19 | 2013 |
| 13,7 | 15,7 | 0,6 | 2 | 1 | 21 | 2000 |
| 13,7 | 15,7 | 0,6 | 2 | 1 | 21 | 2003 |
| 13,7 | 15,7 | 0,6 | 3 | 1 | 22 | 2007 |
| 15,4 | 22,3 | 0,6 | 3 | 1 | 17 | 2014 |
| 17   | 30   | 0,6 | 5 | 1 | 19 | 2013 |
| 13,9 | 16,4 | 0,6 | 2 | 1 | 19 | 1999 |
| 14,7 | 19,4 | 0,6 | 3 | 1 | 26 | 2001 |
| 14,7 | 19,4 | 0,6 | 3 | 1 | 22 | 2002 |
| 14,7 | 19,4 | 0,6 | 4 | 1 | 26 | 2003 |
| 14,8 | 19,8 | 0,6 | 2 | 1 | 21 | 2000 |

|      |      |     |   |   |    |      |
|------|------|-----|---|---|----|------|
| 14,8 | 19,8 | 0,6 | 5 | 1 | 20 | 2010 |
| 14,8 | 19,8 | 0,6 | 5 | 1 | 20 | 2010 |
| 13,4 | 14,7 | 0,6 | 2 | 1 | 26 | 2003 |
| 13,4 | 14,7 | 0,6 | 2 | 1 | 20 | 2011 |
| 15,8 | 24,1 | 0,6 | 3 | 1 | 19 | 2007 |
| 16,1 | 25,5 | 0,6 | 3 | 1 | 21 | 2001 |
| 15,6 | 23,2 | 0,6 | 4 | 1 | 20 | 2013 |
| 14,2 | 17,5 | 0,6 | 2 | 1 | 17 | 2002 |
| 14,2 | 17,5 | 0,6 | 3 | 1 | 21 | 2005 |
| 14,2 | 17,5 | 0,6 | 3 | 1 | 22 | 2011 |
| 14,2 | 17,5 | 0,6 | 6 | 1 | 19 | 2014 |
| 17,2 | 31,1 | 0,6 | 5 | 1 | 18 | 2000 |
| 11,9 | 10,3 | 0,6 | 2 | 1 | 19 | 2007 |
| 12,2 | 11,1 | 0,6 | 2 | 1 | 19 | 2014 |
| 17,7 | 33,9 | 0,6 | 5 | 1 | 15 | 2015 |
| 15,3 | 21,9 | 0,6 | 5 | 1 | 18 | 2000 |
| 15,9 | 24,6 | 0,6 | 3 | 1 | 21 | 2001 |
| 13,3 | 14,4 | 0,6 | 2 | 1 | 20 | 2002 |
| 16,4 | 27   | 0,6 | 6 | 1 | 21 | 2010 |

|      |      |     |   |   |    |      |
|------|------|-----|---|---|----|------|
| 16,4 | 27   | 0,6 | 6 | 1 | 21 | 2010 |
| 11,2 | 8,6  | 0,6 | 1 | 1 | 23 | 2005 |
| 14,3 | 17,9 | 0,6 | 2 | 1 | 24 | 2001 |
| 14,3 | 17,9 | 0,6 | 3 | 1 | 24 | 2001 |
| 18   | 35,7 | 0,6 | 6 | 1 | 19 | 2013 |
| 16,5 | 27,5 | 0,6 | 7 | 1 | 22 | 2001 |
| 16,5 | 27,5 | 0,6 | 3 | 1 | 21 | 2015 |
| 13,6 | 15,4 | 0,6 | 3 | 1 | 19 | 2013 |
| 15,2 | 21,5 | 0,6 | 5 | 1 | 19 | 2007 |
| 15,2 | 21,5 | 0,6 | 3 | 1 | 16 | 2008 |
| 15,2 | 21,5 | 0,6 | 4 | 1 | 24 | 2009 |
| 15,2 | 21,5 | 0,6 | 5 | 1 | 17 | 2014 |
| 17,3 | 31,7 | 0,6 | 5 | 1 | 19 | 2000 |
| 14   | 16,8 | 0,6 | 4 | 1 | 22 | 2004 |
| 14   | 16,8 | 0,6 | 4 | 1 | 20 | 2006 |
| 14   | 16,8 | 0,6 | 2 | 1 | 21 | 2006 |
| 14   | 16,8 | 0,6 | 3 | 1 | 20 | 2007 |
| 14   | 16,8 | 0,6 | 3 | 1 | 20 | 2008 |
| 14   | 16,8 | 0,6 | 4 | 1 | 20 | 2009 |

|      |      |     |    |   |    |      |
|------|------|-----|----|---|----|------|
| 14   | 16,8 | 0,6 | 6  | 1 | 22 | 2011 |
| 14   | 16,8 | 0,6 | 4  | 1 | 17 | 2014 |
| 14   | 16,8 | 0,6 | 2  | 1 | 15 | 2015 |
| 15,5 | 22,8 | 0,6 | 3  | 1 | 24 | 2001 |
| 15,5 | 22,8 | 0,6 | 3  | 1 | 21 | 2003 |
| 15,5 | 22,8 | 0,6 | 4  | 1 | 23 | 2006 |
| 15,7 | 23,7 | 0,6 | 5  | 1 | 26 | 2000 |
| 15,7 | 23,7 | 0,6 | 3  | 1 | 18 | 2002 |
| 13,8 | 16,1 | 0,6 | 3  | 1 | 25 | 2003 |
| 13,8 | 16,1 | 0,6 | 7  | 1 | 21 | 2009 |
| 16   | 25,1 | 0,6 | 5  | 1 | 20 | 2001 |
| 16   | 25,1 | 0,6 | 10 | 1 | 23 | 2002 |
| 15,1 | 21,1 | 0,6 | 4  | 1 | 22 | 2005 |
| 15,1 | 21,1 | 0,6 | 5  | 1 | 24 | 2006 |
| 15,1 | 21,1 | 0,6 | 3  | 1 | 19 | 2013 |
| 15,1 | 21,1 | 0,6 | 3  | 1 | 18 | 2015 |
| 14,4 | 18,3 | 0,6 | 2  | 1 | 26 | 2003 |
| 14,4 | 18,3 | 0,6 | 4  | 1 | 24 | 2009 |
| 13,2 | 14,1 | 0,6 | 2  | 1 | 26 | 1999 |

|      |      |     |   |   |    |      |
|------|------|-----|---|---|----|------|
| 13,2 | 14,1 | 0,6 | 3 | 1 | 19 | 2007 |
| 13,2 | 14,1 | 0,6 | 3 | 1 | 23 | 2009 |
| 13,2 | 14,1 | 0,6 | 2 | 1 | 26 | 2009 |
| 13,2 | 14,1 | 0,6 | 3 | 1 | 21 | 2011 |
| 13,2 | 14,1 | 0,6 | 2 | 1 | 20 | 2012 |
| 13,2 | 14,1 | 0,6 | 2 | 1 | 19 | 2013 |
| 17,4 | 32,3 | 0,6 | 7 | 1 | 24 | 2001 |
| 17,7 | 34   | 0,6 | 6 | 1 | 16 | 2015 |
| 17,2 | 31,2 | 0,6 | 6 | 1 | 17 | 2002 |
| 10,5 | 7,1  | 0,6 | 2 | 1 | 23 | 2004 |
| 15   | 20,7 | 0,6 | 6 | 1 | 23 | 2011 |
| 15   | 20,7 | 0,6 | 4 | 1 | 20 | 2013 |
| 15   | 20,7 | 0,6 | 4 | 1 | 18 | 2015 |
| 14,5 | 18,7 | 0,6 | 2 | 1 | 24 | 2001 |
| 14,5 | 18,7 | 0,6 | 3 | 1 | 20 | 2003 |
| 14,5 | 18,7 | 0,6 | 4 | 1 | 20 | 2004 |
| 14,5 | 18,7 | 0,6 | 5 | 1 | 26 | 2006 |
| 14,5 | 18,7 | 0,6 | 3 | 1 | 19 | 2010 |
| 14,5 | 18,7 | 0,6 | 3 | 1 | 19 | 2010 |

|      |      |     |   |   |    |      |
|------|------|-----|---|---|----|------|
| 14,5 | 18,7 | 0,6 | 4 | 1 | 17 | 2012 |
| 14,5 | 18,7 | 0,6 | 3 | 1 | 16 | 2015 |
| 12   | 10,6 | 0,6 | 2 | 1 | 18 | 2007 |
| 16,1 | 25,6 | 0,6 | 4 | 1 | 18 | 1999 |
| 17,8 | 34,6 | 0,6 | 5 | 1 | 21 | 2000 |
| 14,1 | 17,2 | 0,6 | 3 | 1 | 26 | 2003 |
| 14,1 | 17,2 | 0,6 | 3 | 1 | 20 | 2007 |
| 14,1 | 17,2 | 0,6 | 3 | 1 | 19 | 2008 |
| 21,3 | 59,3 | 0,6 | 9 | 1 | 17 | 2014 |
| 12,4 | 11,7 | 0,6 | 2 | 1 | 22 | 2011 |
| 14,9 | 20,3 | 0,6 | 3 | 1 | 16 | 2008 |
| 14,9 | 20,3 | 0,6 | 5 | 1 | 19 | 2012 |
| 14,9 | 20,3 | 0,6 | 4 | 1 | 19 | 2013 |
| 14,6 | 19,1 | 0,6 | 3 | 1 | 18 | 2014 |
| 13,5 | 15,1 | 0,6 | 2 | 1 | 21 | 2000 |
| 13,5 | 15,1 | 0,6 | 2 | 1 | 23 | 2010 |
| 13,5 | 15,1 | 0,6 | 2 | 1 | 23 | 2010 |
| 13,5 | 15,1 | 0,6 | 2 | 1 | 16 | 2015 |
| 18,2 | 37   | 0,6 | 4 | 1 | 19 | 2012 |

|      |      |     |   |   |    |      |
|------|------|-----|---|---|----|------|
| 13,1 | 13,8 | 0,6 | 2 | 1 | 26 | 1999 |
| 13,1 | 13,8 | 0,6 | 2 | 1 | 22 | 2001 |
| 13,1 | 13,8 | 0,6 | 5 | 1 | 18 | 2007 |
| 13,1 | 13,8 | 0,6 | 3 | 1 | 19 | 2007 |
| 13,1 | 13,8 | 0,6 | 2 | 1 | 22 | 2009 |
| 13,1 | 13,8 | 0,6 | 2 | 1 | 26 | 2009 |
| 13,1 | 13,8 | 0,6 | 2 | 1 | 19 | 2010 |
| 13,1 | 13,8 | 0,6 | 2 | 1 | 19 | 2010 |
| 14,8 | 19,9 | 0,6 | 3 | 1 | 21 | 2015 |
| 14,7 | 19,5 | 0,6 | 4 | 1 | 21 | 2009 |
| 14,7 | 19,5 | 0,6 | 5 | 1 | 21 | 2010 |
| 14,7 | 19,5 | 0,6 | 5 | 1 | 21 | 2010 |
| 16,2 | 26,1 | 0,6 | 4 | 1 | 19 | 2010 |
| 16,2 | 26,1 | 0,6 | 4 | 1 | 19 | 2010 |
| 17,1 | 30,7 | 0,6 | 4 | 1 | 17 | 2002 |
| 16,3 | 26,6 | 0,6 | 6 | 1 | 22 | 2004 |
| 16,3 | 26,6 | 0,6 | 8 | 1 | 20 | 2013 |
| 16,3 | 26,6 | 0,6 | 5 | 1 | 19 | 2014 |
| 15,3 | 22   | 0,6 | 4 | 1 | 21 | 2013 |

|      |      |     |    |   |    |      |
|------|------|-----|----|---|----|------|
| 15,3 | 22   | 0,6 | 3  | 1 | 15 | 2015 |
| 16,6 | 28,1 | 0,6 | 10 | 1 | 25 | 2004 |
| 13,9 | 16,5 | 0,6 | 5  | 1 | 26 | 2006 |
| 13,9 | 16,5 | 0,6 | 3  | 1 | 16 | 2015 |
| 12,5 | 12   | 0,6 | 1  | 1 | 26 | 2001 |
| 12,5 | 12   | 0,6 | 3  | 1 | 22 | 2005 |
| 16,5 | 27,6 | 0,6 | 4  | 1 | 22 | 2001 |
| 16,5 | 27,6 | 0,6 | 6  | 1 | 19 | 2013 |
| 13,7 | 15,8 | 0,6 | 2  | 1 | 26 | 1999 |
| 13,7 | 15,8 | 0,6 | 2  | 1 | 26 | 2001 |
| 13,7 | 15,8 | 0,6 | 3  | 1 | 19 | 2015 |
| 13   | 13,5 | 0,6 | 2  | 1 | 25 | 1999 |
| 13   | 13,5 | 0,6 | 2  | 1 | 21 | 2001 |
| 13   | 13,5 | 0,6 | 2  | 1 | 20 | 2002 |
| 13   | 13,5 | 0,6 | 3  | 1 | 22 | 2004 |
| 13   | 13,5 | 0,6 | 3  | 1 | 23 | 2005 |
| 13   | 13,5 | 0,6 | 2  | 1 | 24 | 2006 |
| 13   | 13,5 | 0,6 | 3  | 1 | 18 | 2007 |
| 13   | 13,5 | 0,6 | 2  | 1 | 20 | 2009 |

|      |      |     |    |   |    |      |
|------|------|-----|----|---|----|------|
| 13   | 13,5 | 0,6 | 3  | 1 | 21 | 2011 |
| 13   | 13,5 | 0,6 | 2  | 1 | 20 | 2013 |
| 13   | 13,5 | 0,6 | 2  | 1 | 20 | 2013 |
| 13   | 13,5 | 0,6 | 2  | 1 | 21 | 2014 |
| 21,7 | 62,8 | 0,6 | 10 | 1 | 17 | 2012 |
| 14,2 | 17,6 | 0,6 | 2  | 1 | 24 | 2001 |
| 14,2 | 17,6 | 0,6 | 4  | 1 | 22 | 2011 |
| 14,2 | 17,6 | 0,6 | 4  | 1 | 22 | 2011 |
| 14,2 | 17,6 | 0,6 | 3  | 1 | 19 | 2014 |
| 14,2 | 17,6 | 0,6 | 3  | 1 | 15 | 2015 |
| 17   | 30,2 | 0,6 | 7  | 1 | 17 | 2012 |
| 11,8 | 10,1 | 0,6 | 2  | 1 | 22 | 2007 |
| 12,6 | 12,3 | 0,6 | 2  | 1 | 20 | 2002 |
| 12,6 | 12,3 | 0,6 | 2  | 1 | 26 | 2009 |
| 12,6 | 12,3 | 0,6 | 2  | 1 | 17 | 2014 |
| 12,9 | 13,2 | 0,6 | 3  | 1 | 21 | 2005 |
| 15,5 | 22,9 | 0,6 | 4  | 1 | 22 | 2004 |
| 15,7 | 23,8 | 0,6 | 4  | 1 | 18 | 1999 |
| 15,2 | 21,6 | 0,6 | 4  | 1 | 19 | 2015 |

|      |      |     |   |   |    |      |
|------|------|-----|---|---|----|------|
| 13,4 | 14,8 | 0,6 | 3 | 1 | 23 | 2001 |
| 13,4 | 14,8 | 0,6 | 2 | 1 | 19 | 2006 |
| 13,4 | 14,8 | 0,6 | 4 | 1 | 24 | 2006 |
| 17,2 | 31,3 | 0,6 | 5 | 1 | 23 | 2003 |
| 12,7 | 12,6 | 0,6 | 2 | 1 | 18 | 2002 |
| 12,7 | 12,6 | 0,6 | 2 | 1 | 21 | 2009 |
| 12,8 | 12,9 | 0,6 | 2 | 1 | 20 | 2013 |
| 12,8 | 12,9 | 0,6 | 2 | 1 | 21 | 2014 |
| 16   | 25,2 | 0,6 | 5 | 1 | 19 | 2004 |
| 12,1 | 10,9 | 0,6 | 2 | 1 | 19 | 2007 |
| 12,1 | 10,9 | 0,6 | 2 | 1 | 23 | 2010 |
| 12,1 | 10,9 | 0,6 | 2 | 1 | 23 | 2010 |
| 14,3 | 18   | 0,6 | 4 | 1 | 22 | 2011 |
| 14,3 | 18   | 0,6 | 4 | 1 | 18 | 2015 |
| 17,5 | 33   | 0,6 | 4 | 1 | 19 | 2013 |
| 15,1 | 21,2 | 0,6 | 6 | 1 | 17 | 2008 |
| 15,1 | 21,2 | 0,6 | 5 | 1 | 19 | 2012 |
| 16,1 | 25,7 | 0,6 | 5 | 1 | 16 | 2008 |
| 16,1 | 25,7 | 0,6 | 5 | 1 | 20 | 2013 |

|      |      |     |   |   |    |      |
|------|------|-----|---|---|----|------|
| 14   | 16,9 | 0,6 | 4 | 1 | 19 | 1999 |
| 14   | 16,9 | 0,6 | 2 | 1 | 21 | 2000 |
| 14   | 16,9 | 0,6 | 3 | 1 | 21 | 2008 |
| 14   | 16,9 | 0,6 | 3 | 1 | 22 | 2015 |
| 15,4 | 22,5 | 0,6 | 3 | 1 | 20 | 2006 |
| 15,4 | 22,5 | 0,6 | 5 | 1 | 21 | 2013 |
| 15,4 | 22,5 | 0,6 | 3 | 1 | 18 | 2015 |
| 15,8 | 24,3 | 0,6 | 4 | 1 | 24 | 2001 |
| 15,8 | 24,3 | 0,6 | 4 | 1 | 18 | 2014 |
| 17,3 | 31,9 | 0,6 | 5 | 1 | 21 | 2010 |
| 17,3 | 31,9 | 0,6 | 5 | 1 | 21 | 2010 |
| 17,3 | 31,9 | 0,6 | 7 | 1 | 19 | 2014 |
| 13,6 | 15,5 | 0,6 | 3 | 1 | 24 | 2001 |
| 13,6 | 15,5 | 0,6 | 6 | 1 | 22 | 2005 |
| 13,6 | 15,5 | 0,6 | 3 | 1 | 25 | 2008 |
| 13,6 | 15,5 | 0,6 | 2 | 1 | 23 | 2009 |
| 13,6 | 15,5 | 0,6 | 3 | 1 | 18 | 2015 |
| 14,4 | 18,4 | 0,6 | 3 | 1 | 26 | 2001 |
| 14,4 | 18,4 | 0,6 | 3 | 1 | 26 | 2003 |

|      |      |     |   |   |    |      |
|------|------|-----|---|---|----|------|
| 14,4 | 18,4 | 0,6 | 2 | 1 | 23 | 2008 |
| 14,4 | 18,4 | 0,6 | 2 | 1 | 22 | 2013 |
| 14,4 | 18,4 | 0,6 | 3 | 1 | 18 | 2015 |
| 14,4 | 18,4 | 0,6 | 3 | 1 | 18 | 2015 |
| 16,7 | 28,7 | 0,6 | 4 | 1 | 19 | 2001 |
| 16,7 | 28,7 | 0,6 | 7 | 1 | 22 | 2001 |
| 16,2 | 26,2 | 0,6 | 5 | 1 | 22 | 2005 |
| 16,2 | 26,2 | 0,6 | 6 | 1 | 22 | 2015 |
| 15   | 20,8 | 0,6 | 5 | 1 | 18 | 1999 |
| 15   | 20,8 | 0,6 | 4 | 1 | 19 | 1999 |
| 15   | 20,8 | 0,6 | 5 | 1 | 23 | 1999 |
| 15   | 20,8 | 0,6 | 3 | 1 | 21 | 2001 |
| 15   | 20,8 | 0,6 | 4 | 1 | 22 | 2009 |
| 15   | 20,8 | 0,6 | 3 | 1 | 19 | 2012 |
| 13,3 | 14,5 | 0,6 | 2 | 1 | 22 | 2000 |
| 13,3 | 14,5 | 0,6 | 2 | 1 | 26 | 2009 |
| 13,3 | 14,5 | 0,6 | 3 | 1 | 20 | 2011 |
| 13,3 | 14,5 | 0,6 | 9 | 1 | 21 | 2011 |
| 13,3 | 14,5 | 0,6 | 2 | 1 | 18 | 2012 |

|      |      |     |   |   |    |      |
|------|------|-----|---|---|----|------|
| 13,3 | 14,5 | 0,6 | 4 | 1 | 21 | 2013 |
| 13,3 | 14,5 | 0,6 | 2 | 1 | 18 | 2014 |
| 15,6 | 23,4 | 0,6 | 4 | 1 | 21 | 1999 |
| 15,6 | 23,4 | 0,6 | 5 | 1 | 19 | 2014 |
| 13,8 | 16,2 | 0,6 | 5 | 1 | 19 | 1999 |
| 13,8 | 16,2 | 0,6 | 3 | 1 | 21 | 2000 |
| 13,8 | 16,2 | 0,6 | 3 | 1 | 25 | 2003 |
| 13,8 | 16,2 | 0,6 | 3 | 1 | 18 | 2008 |
| 13,8 | 16,2 | 0,6 | 3 | 1 | 19 | 2013 |
| 16,3 | 26,7 | 0,6 | 5 | 1 | 23 | 2011 |
| 14,5 | 18,8 | 0,6 | 4 | 1 | 20 | 1999 |
| 14,5 | 18,8 | 0,6 | 3 | 1 | 18 | 2015 |
| 14,9 | 20,4 | 0,6 | 5 | 1 | 19 | 2012 |
| 12,2 | 11,2 | 0,6 | 1 | 1 | 26 | 2003 |
| 12,2 | 11,2 | 0,6 | 2 | 1 | 18 | 2007 |
| 12,2 | 11,2 | 0,6 | 2 | 1 | 22 | 2009 |
| 12,2 | 11,2 | 0,6 | 2 | 1 | 19 | 2011 |
| 14,6 | 19,2 | 0,6 | 3 | 1 | 22 | 2001 |
| 14,6 | 19,2 | 0,6 | 3 | 1 | 17 | 2002 |

|      |      |     |   |   |    |      |
|------|------|-----|---|---|----|------|
| 14,6 | 19,2 | 0,6 | 3 | 1 | 20 | 2003 |
| 14,6 | 19,2 | 0,6 | 7 | 1 | 21 | 2009 |
| 14,8 | 20   | 0,6 | 3 | 1 | 23 | 2006 |
| 14,8 | 20   | 0,6 | 3 | 1 | 20 | 2012 |
| 14,7 | 19,6 | 0,6 | 3 | 1 | 26 | 2003 |
| 15,3 | 22,1 | 0,6 | 4 | 1 | 23 | 1999 |
| 15,3 | 22,1 | 0,6 | 5 | 1 | 22 | 2007 |
| 15,3 | 22,1 | 0,6 | 3 | 1 | 20 | 2011 |
| 14,1 | 17,3 | 0,6 | 2 | 1 | 25 | 2003 |
| 14,1 | 17,3 | 0,6 | 4 | 1 | 21 | 2006 |
| 14,1 | 17,3 | 0,6 | 3 | 1 | 17 | 2008 |
| 14,1 | 17,3 | 0,6 | 2 | 1 | 19 | 2013 |
| 18   | 36   | 0,6 | 8 | 1 | 15 | 2015 |
| 13,2 | 14,2 | 0,6 | 3 | 1 | 19 | 2005 |
| 13,2 | 14,2 | 0,6 | 2 | 1 | 19 | 2008 |
| 13,2 | 14,2 | 0,6 | 3 | 1 | 23 | 2009 |
| 13,2 | 14,2 | 0,6 | 2 | 1 | 19 | 2013 |
| 13,2 | 14,2 | 0,6 | 2 | 1 | 19 | 2013 |
| 13,2 | 14,2 | 0,6 | 2 | 1 | 17 | 2014 |

|      |      |     |   |   |    |      |
|------|------|-----|---|---|----|------|
| 13,2 | 14,2 | 0,6 | 2 | 1 | 18 | 2014 |
| 13,2 | 14,2 | 0,6 | 3 | 1 | 18 | 2014 |
| 20,2 | 50,9 | 0,6 | 5 | 1 | 18 | 2012 |
| 15,7 | 23,9 | 0,6 | 3 | 1 | 19 | 2001 |
| 19,3 | 44,4 | 0,6 | 8 | 1 | 21 | 2013 |
| 15,5 | 23   | 0,6 | 5 | 1 | 22 | 2004 |
| 16   | 25,3 | 0,6 | 5 | 1 | 20 | 1999 |
| 16   | 25,3 | 0,6 | 4 | 1 | 17 | 2002 |
| 16   | 25,3 | 0,6 | 4 | 1 | 22 | 2011 |
| 13,5 | 15,2 | 0,6 | 2 | 1 | 22 | 2000 |
| 13,5 | 15,2 | 0,6 | 2 | 1 | 18 | 2002 |
| 13,5 | 15,2 | 0,6 | 3 | 1 | 25 | 2007 |
| 13,5 | 15,2 | 0,6 | 3 | 1 | 23 | 2010 |
| 13,5 | 15,2 | 0,6 | 3 | 1 | 23 | 2010 |
| 13,5 | 15,2 | 0,6 | 2 | 1 | 20 | 2012 |
| 18,7 | 40,4 | 0,6 | 4 | 1 | 18 | 2012 |
| 15,2 | 21,7 | 0,6 | 4 | 1 | 18 | 1999 |
| 15,2 | 21,7 | 0,6 | 4 | 1 | 20 | 2000 |
| 15,2 | 21,7 | 0,6 | 6 | 1 | 24 | 2001 |

|      |      |     |   |   |    |      |
|------|------|-----|---|---|----|------|
| 15,2 | 21,7 | 0,6 | 3 | 1 | 17 | 2002 |
| 15,2 | 21,7 | 0,6 | 4 | 1 | 23 | 2003 |
| 15,2 | 21,7 | 0,6 | 4 | 1 | 17 | 2009 |
| 15,2 | 21,7 | 0,6 | 9 | 1 | 22 | 2009 |
| 19,9 | 48,7 | 0,6 | 7 | 1 | 18 | 2012 |
| 12,3 | 11,5 | 0,6 | 2 | 1 | 26 | 2006 |
| 11,7 | 9,9  | 0,6 | 1 | 1 | 26 | 2001 |
| 17,6 | 33,7 | 0,6 | 6 | 1 | 24 | 2006 |
| 14,2 | 17,7 | 0,6 | 4 | 1 | 21 | 2006 |
| 14,2 | 17,7 | 0,6 | 3 | 1 | 18 | 2014 |
| 14,2 | 17,7 | 0,6 | 3 | 1 | 18 | 2014 |
| 14,2 | 17,7 | 0,6 | 3 | 1 | 22 | 2015 |
| 16,1 | 25,8 | 0,6 | 5 | 1 | 21 | 2000 |
| 16,1 | 25,8 | 0,6 | 5 | 1 | 19 | 2013 |
| 13,1 | 13,9 | 0,6 | 2 | 1 | 24 | 2006 |
| 13,1 | 13,9 | 0,6 | 5 | 1 | 23 | 2010 |
| 13,1 | 13,9 | 0,6 | 5 | 1 | 23 | 2010 |
| 13,7 | 15,9 | 0,6 | 2 | 1 | 22 | 2001 |
| 13,7 | 15,9 | 0,6 | 4 | 1 | 25 | 2005 |

|      |      |     |   |   |    |      |
|------|------|-----|---|---|----|------|
| 13,7 | 15,9 | 0,6 | 3 | 1 | 19 | 2008 |
| 13,7 | 15,9 | 0,6 | 3 | 1 | 20 | 2011 |
| 16,7 | 28,8 | 0,6 | 4 | 1 | 23 | 2002 |
| 16,2 | 26,3 | 0,6 | 3 | 1 | 22 | 2003 |
| 16,2 | 26,3 | 0,6 | 5 | 1 | 18 | 2012 |
| 15,8 | 24,4 | 0,6 | 4 | 1 | 21 | 2015 |
| 15,1 | 21,3 | 0,6 | 4 | 1 | 18 | 2004 |
| 16,6 | 28,3 | 0,6 | 4 | 1 | 15 | 2015 |
| 17   | 30,4 | 0,6 | 5 | 1 | 21 | 2010 |
| 17   | 30,4 | 0,6 | 5 | 1 | 21 | 2010 |
| 15,4 | 22,6 | 0,6 | 4 | 1 | 20 | 2013 |
| 16,3 | 26,8 | 0,6 | 5 | 1 | 20 | 2003 |
| 16,3 | 26,8 | 0,6 | 4 | 1 | 19 | 2015 |
| 16,5 | 27,8 | 0,6 | 4 | 1 | 19 | 2002 |
| 14,3 | 18,1 | 0,6 | 3 | 1 | 21 | 2000 |
| 14,3 | 18,1 | 0,6 | 3 | 1 | 19 | 2010 |
| 14,3 | 18,1 | 0,6 | 3 | 1 | 19 | 2010 |
| 13   | 13,6 | 0,6 | 3 | 1 | 21 | 2005 |
| 13   | 13,6 | 0,6 | 2 | 1 | 20 | 2010 |

|      |      |     |   |   |    |      |
|------|------|-----|---|---|----|------|
| 13   | 13,6 | 0,6 | 2 | 1 | 23 | 2010 |
| 13   | 13,6 | 0,6 | 2 | 1 | 20 | 2010 |
| 13   | 13,6 | 0,6 | 2 | 1 | 23 | 2010 |
| 13   | 13,6 | 0,6 | 2 | 1 | 19 | 2013 |
| 13   | 13,6 | 0,6 | 2 | 1 | 19 | 2014 |
| 17,2 | 31,5 | 0,6 | 4 | 1 | 23 | 2002 |
| 12   | 10,7 | 0,6 | 1 | 1 | 26 | 2001 |
| 12   | 10,7 | 0,6 | 2 | 1 | 19 | 2007 |
| 12   | 10,7 | 0,6 | 2 | 1 | 23 | 2007 |
| 12   | 10,7 | 0,6 | 2 | 1 | 23 | 2009 |
| 13,4 | 14,9 | 0,6 | 3 | 1 | 20 | 2000 |
| 13,4 | 14,9 | 0,6 | 2 | 1 | 19 | 2002 |
| 13,4 | 14,9 | 0,6 | 3 | 1 | 21 | 2005 |
| 13,4 | 14,9 | 0,6 | 3 | 1 | 19 | 2014 |
| 15   | 20,9 | 0,6 | 6 | 1 | 21 | 1999 |
| 15   | 20,9 | 0,6 | 7 | 1 | 19 | 2009 |
| 15,9 | 24,9 | 0,6 | 5 | 1 | 18 | 1999 |
| 12,5 | 12,1 | 0,6 | 2 | 1 | 26 | 2009 |
| 12,5 | 12,1 | 0,6 | 2 | 1 | 20 | 2013 |

|      |      |     |   |   |    |      |
|------|------|-----|---|---|----|------|
| 14   | 17   | 0,6 | 2 | 1 | 22 | 2001 |
| 14   | 17   | 0,6 | 4 | 1 | 19 | 2007 |
| 14   | 17   | 0,6 | 5 | 1 | 25 | 2007 |
| 14   | 17   | 0,6 | 4 | 1 | 24 | 2009 |
| 14   | 17   | 0,6 | 4 | 1 | 20 | 2011 |
| 14   | 17   | 0,6 | 2 | 1 | 17 | 2012 |
| 14   | 17   | 0,6 | 4 | 1 | 21 | 2013 |
| 14   | 17   | 0,6 | 3 | 1 | 18 | 2014 |
| 12,9 | 13,3 | 0,6 | 2 | 1 | 25 | 1999 |
| 12,9 | 13,3 | 0,6 | 3 | 1 | 23 | 2007 |
| 14,4 | 18,5 | 0,6 | 6 | 1 | 23 | 1999 |
| 14,9 | 20,5 | 0,6 | 4 | 1 | 18 | 1999 |
| 14,9 | 20,5 | 0,6 | 3 | 1 | 23 | 2003 |
| 21   | 57,4 | 0,6 | 8 | 1 | 19 | 2013 |
| 15,3 | 22,2 | 0,6 | 3 | 1 | 21 | 2000 |
| 15,3 | 22,2 | 0,6 | 3 | 1 | 23 | 2002 |
| 15,3 | 22,2 | 0,6 | 4 | 1 | 21 | 2003 |
| 12,6 | 12,4 | 0,6 | 3 | 1 | 19 | 2008 |
| 12,6 | 12,4 | 0,6 | 2 | 1 | 23 | 2010 |

|      |      |     |    |   |    |      |
|------|------|-----|----|---|----|------|
| 12,6 | 12,4 | 0,6 | 2  | 1 | 23 | 2010 |
| 12,8 | 13   | 0,6 | 2  | 1 | 22 | 2011 |
| 12,8 | 13   | 0,6 | 2  | 1 | 20 | 2013 |
| 14,5 | 18,9 | 0,6 | 6  | 1 | 20 | 1999 |
| 14,5 | 18,9 | 0,6 | 3  | 1 | 20 | 2000 |
| 12,7 | 12,7 | 0,6 | 2  | 1 | 19 | 2009 |
| 12,7 | 12,7 | 0,6 | 2  | 1 | 23 | 2009 |
| 12,7 | 12,7 | 0,6 | 2  | 1 | 19 | 2013 |
| 14,8 | 20,1 | 0,6 | 3  | 1 | 20 | 2003 |
| 20,8 | 55,8 | 0,6 | 10 | 1 | 18 | 2012 |
| 16   | 25,4 | 0,6 | 5  | 1 | 21 | 2014 |
| 14,6 | 19,3 | 0,6 | 3  | 1 | 18 | 2000 |
| 14,6 | 19,3 | 0,6 | 4  | 1 | 21 | 2009 |
| 14,6 | 19,3 | 0,6 | 5  | 1 | 26 | 2009 |
| 13,6 | 15,6 | 0,6 | 3  | 1 | 25 | 2003 |
| 15,7 | 24   | 0,6 | 5  | 1 | 20 | 1999 |
| 15,7 | 24   | 0,6 | 4  | 1 | 20 | 2004 |
| 14,7 | 19,7 | 0,6 | 3  | 1 | 22 | 2004 |
| 14,7 | 19,7 | 0,6 | 3  | 1 | 21 | 2015 |

|      |      |     |   |   |    |      |
|------|------|-----|---|---|----|------|
| 13,8 | 16,3 | 0,6 | 4 | 1 | 26 | 1999 |
| 13,8 | 16,3 | 0,6 | 2 | 1 | 24 | 2006 |
| 13,8 | 16,3 | 0,6 | 4 | 1 | 24 | 2009 |
| 15,5 | 23,1 | 0,6 | 5 | 1 | 18 | 1999 |
| 15,5 | 23,1 | 0,6 | 3 | 1 | 21 | 2001 |
| 15,5 | 23,1 | 0,6 | 4 | 1 | 15 | 2015 |
| 16,7 | 28,9 | 0,6 | 6 | 1 | 20 | 2011 |
| 13,3 | 14,6 | 0,6 | 2 | 1 | 23 | 2002 |
| 13,3 | 14,6 | 0,6 | 3 | 1 | 18 | 2008 |
| 13,3 | 14,6 | 0,6 | 2 | 1 | 20 | 2008 |
| 13,3 | 14,6 | 0,6 | 3 | 1 | 21 | 2015 |
| 14,1 | 17,4 | 0,6 | 3 | 1 | 23 | 1999 |
| 15,2 | 21,8 | 0,6 | 4 | 1 | 20 | 2001 |
| 15,2 | 21,8 | 0,6 | 5 | 1 | 22 | 2005 |
| 15,2 | 21,8 | 0,6 | 5 | 1 | 26 | 2009 |
| 15,2 | 21,8 | 0,6 | 7 | 1 | 19 | 2012 |
| 15,2 | 21,8 | 0,6 | 4 | 1 | 21 | 2012 |
| 15,2 | 21,8 | 0,6 | 3 | 1 | 17 | 2014 |
| 11,8 | 10,2 | 0,6 | 1 | 1 | 25 | 1999 |

|      |      |     |   |   |    |      |
|------|------|-----|---|---|----|------|
| 12,1 | 11   | 0,6 | 2 | 1 | 22 | 2007 |
| 16,2 | 26,4 | 0,6 | 5 | 1 | 22 | 2003 |
| 16,2 | 26,4 | 0,6 | 5 | 1 | 26 | 2005 |
| 16,2 | 26,4 | 0,6 | 7 | 1 | 21 | 2014 |
| 17,2 | 31,6 | 0,6 | 7 | 1 | 21 | 2012 |
| 16,5 | 27,9 | 0,6 | 3 | 1 | 18 | 2014 |
| 16,5 | 27,9 | 0,6 | 3 | 1 | 15 | 2015 |
| 16,3 | 26,9 | 0,6 | 5 | 1 | 18 | 1999 |
| 16,3 | 26,9 | 0,6 | 7 | 1 | 26 | 2003 |
| 16,3 | 26,9 | 0,6 | 4 | 1 | 17 | 2008 |
| 16,3 | 26,9 | 0,6 | 6 | 1 | 20 | 2011 |
| 16,3 | 26,9 | 0,6 | 4 | 1 | 18 | 2014 |
| 15,8 | 24,5 | 0,6 | 5 | 1 | 18 | 1999 |
| 15,8 | 24,5 | 0,6 | 4 | 1 | 22 | 1999 |
| 15,8 | 24,5 | 0,6 | 5 | 1 | 19 | 2012 |
| 16,4 | 27,4 | 0,6 | 3 | 1 | 20 | 2003 |
| 16,4 | 27,4 | 0,6 | 6 | 1 | 21 | 2003 |
| 16,4 | 27,4 | 0,6 | 6 | 1 | 25 | 2004 |
| 17,5 | 33,3 | 0,6 | 6 | 1 | 19 | 2011 |

|      |      |     |   |   |    |      |
|------|------|-----|---|---|----|------|
| 11,1 | 8,5  | 0,6 | 1 | 1 | 22 | 2007 |
| 16,9 | 30   | 0,6 | 7 | 1 | 17 | 2014 |
| 15,1 | 21,4 | 0,6 | 7 | 1 | 20 | 2007 |
| 15,1 | 21,4 | 0,6 | 6 | 1 | 23 | 2008 |
| 15,6 | 23,6 | 0,6 | 4 | 1 | 20 | 1999 |
| 15,6 | 23,6 | 0,6 | 5 | 1 | 20 | 1999 |
| 15,6 | 23,6 | 0,6 | 5 | 1 | 22 | 1999 |
| 15,6 | 23,6 | 0,6 | 3 | 1 | 19 | 2012 |
| 14,2 | 17,8 | 0,6 | 2 | 1 | 24 | 2001 |
| 14,2 | 17,8 | 0,6 | 3 | 1 | 25 | 2003 |
| 14,2 | 17,8 | 0,6 | 4 | 1 | 21 | 2006 |
| 14,2 | 17,8 | 0,6 | 4 | 1 | 26 | 2006 |
| 14,2 | 17,8 | 0,6 | 3 | 1 | 21 | 2008 |
| 14,2 | 17,8 | 0,6 | 7 | 1 | 21 | 2009 |
| 14,2 | 17,8 | 0,6 | 2 | 1 | 17 | 2014 |
| 14,2 | 17,8 | 0,6 | 5 | 1 | 21 | 2014 |
| 13,2 | 14,3 | 0,6 | 2 | 1 | 22 | 1999 |
| 13,2 | 14,3 | 0,6 | 3 | 1 | 21 | 2000 |
| 13,2 | 14,3 | 0,6 | 3 | 1 | 20 | 2002 |

|      |      |     |   |   |    |      |
|------|------|-----|---|---|----|------|
| 13,2 | 14,3 | 0,6 | 2 | 1 | 23 | 2002 |
| 13,2 | 14,3 | 0,6 | 2 | 1 | 18 | 2008 |
| 13,2 | 14,3 | 0,6 | 3 | 1 | 19 | 2008 |
| 13,2 | 14,3 | 0,6 | 4 | 1 | 23 | 2009 |
| 13,2 | 14,3 | 0,6 | 3 | 1 | 17 | 2014 |
| 13,2 | 14,3 | 0,6 | 3 | 1 | 21 | 2014 |
| 13,2 | 14,3 | 0,6 | 3 | 1 | 15 | 2015 |
| 13,9 | 16,7 | 0,6 | 3 | 1 | 24 | 2001 |
| 13,9 | 16,7 | 0,6 | 3 | 1 | 24 | 2006 |
| 13,5 | 15,3 | 0,6 | 3 | 1 | 19 | 2006 |
| 13,5 | 15,3 | 0,6 | 2 | 1 | 21 | 2013 |
| 17,3 | 32,2 | 0,6 | 3 | 1 | 19 | 2015 |
| 17,1 | 31,1 | 0,6 | 5 | 1 | 19 | 2013 |
| 15   | 21   | 0,6 | 5 | 1 | 22 | 1999 |
| 15   | 21   | 0,6 | 3 | 1 | 19 | 2000 |
| 15   | 21   | 0,6 | 4 | 1 | 24 | 2001 |
| 15   | 21   | 0,6 | 3 | 1 | 23 | 2003 |
| 15   | 21   | 0,6 | 4 | 1 | 22 | 2004 |
| 15   | 21   | 0,6 | 6 | 1 | 23 | 2006 |

|      |      |     |    |   |    |      |
|------|------|-----|----|---|----|------|
| 15   | 21   | 0,6 | 3  | 1 | 20 | 2008 |
| 15   | 21   | 0,6 | 5  | 1 | 24 | 2009 |
| 15   | 21   | 0,6 | 4  | 1 | 20 | 2013 |
| 13,7 | 16   | 0,6 | 2  | 1 | 20 | 2000 |
| 13,7 | 16   | 0,6 | 5  | 1 | 19 | 2000 |
| 13,7 | 16   | 0,6 | 3  | 1 | 21 | 2003 |
| 13,7 | 16   | 0,6 | 3  | 1 | 22 | 2004 |
| 10,4 | 7    | 0,6 | 1  | 1 | 23 | 2009 |
| 12,2 | 11,3 | 0,6 | 2  | 1 | 25 | 2003 |
| 20   | 49,8 | 0,6 | 10 | 1 | 19 | 2013 |
| 16   | 25,5 | 0,6 | 5  | 1 | 20 | 2000 |
| 16   | 25,5 | 0,6 | 6  | 1 | 19 | 2007 |
| 16   | 25,5 | 0,6 | 4  | 1 | 16 | 2008 |
| 17,4 | 32,8 | 0,6 | 5  | 1 | 19 | 2013 |
| 15,3 | 22,3 | 0,6 | 5  | 1 | 23 | 2006 |
| 15,3 | 22,3 | 0,6 | 5  | 1 | 18 | 2007 |
| 14,9 | 20,6 | 0,6 | 3  | 1 | 19 | 2014 |
| 13,1 | 14   | 0,6 | 2  | 1 | 20 | 2002 |
| 13,1 | 14   | 0,6 | 3  | 1 | 23 | 2005 |

|      |      |     |   |   |    |      |
|------|------|-----|---|---|----|------|
| 13,1 | 14   | 0,6 | 2 | 1 | 24 | 2009 |
| 13,1 | 14   | 0,6 | 2 | 1 | 17 | 2014 |
| 13,1 | 14   | 0,6 | 3 | 1 | 19 | 2014 |
| 13,1 | 14   | 0,6 | 2 | 1 | 19 | 2014 |
| 15,7 | 24,1 | 0,6 | 6 | 1 | 22 | 1999 |
| 15,7 | 24,1 | 0,6 | 4 | 1 | 24 | 2001 |
| 15,7 | 24,1 | 0,6 | 6 | 1 | 20 | 2007 |
| 15,7 | 24,1 | 0,6 | 6 | 1 | 19 | 2015 |
| 17   | 30,6 | 0,6 | 4 | 1 | 21 | 2015 |
| 15,5 | 23,2 | 0,6 | 7 | 1 | 21 | 2009 |
| 16,1 | 26   | 0,6 | 5 | 1 | 18 | 1999 |
| 16,1 | 26   | 0,6 | 5 | 1 | 20 | 2013 |
| 19,2 | 44,1 | 0,6 | 5 | 1 | 19 | 2010 |
| 19,2 | 44,1 | 0,6 | 5 | 1 | 19 | 2010 |
| 11,9 | 10,5 | 0,6 | 2 | 1 | 23 | 2007 |
| 14,8 | 20,2 | 0,6 | 4 | 1 | 18 | 2015 |
| 14   | 17,1 | 0,6 | 4 | 1 | 25 | 2002 |
| 14   | 17,1 | 0,6 | 4 | 1 | 25 | 2004 |
| 14,5 | 19   | 0,6 | 3 | 1 | 26 | 2000 |

|      |      |     |   |   |    |      |
|------|------|-----|---|---|----|------|
| 14,5 | 19   | 0,6 | 2 | 1 | 20 | 2003 |
| 14,5 | 19   | 0,6 | 3 | 1 | 20 | 2004 |
| 14,5 | 19   | 0,6 | 4 | 1 | 20 | 2006 |
| 14,5 | 19   | 0,6 | 3 | 1 | 19 | 2014 |
| 16,5 | 28   | 0,6 | 6 | 1 | 24 | 2001 |
| 14,7 | 19,8 | 0,6 | 5 | 1 | 21 | 2000 |
| 14,7 | 19,8 | 0,6 | 4 | 1 | 26 | 2006 |
| 14,7 | 19,8 | 0,6 | 4 | 1 | 20 | 2011 |
| 14,7 | 19,8 | 0,6 | 4 | 1 | 19 | 2013 |
| 12,3 | 11,6 | 0,6 | 2 | 1 | 19 | 2006 |
| 12,3 | 11,6 | 0,6 | 2 | 1 | 19 | 2006 |
| 14,6 | 19,4 | 0,6 | 4 | 1 | 25 | 1999 |
| 13,4 | 15   | 0,6 | 2 | 1 | 20 | 2000 |
| 13,4 | 15   | 0,6 | 3 | 1 | 25 | 2004 |
| 13,4 | 15   | 0,6 | 3 | 1 | 18 | 2008 |
| 13,4 | 15   | 0,6 | 4 | 1 | 22 | 2009 |
| 13,4 | 15   | 0,6 | 2 | 1 | 24 | 2009 |
| 16,3 | 27   | 0,6 | 4 | 1 | 19 | 2013 |
| 13   | 13,7 | 0,6 | 3 | 1 | 22 | 2005 |

|      |      |     |   |   |    |      |
|------|------|-----|---|---|----|------|
| 13   | 13,7 | 0,6 | 3 | 1 | 23 | 2007 |
| 13   | 13,7 | 0,6 | 3 | 1 | 25 | 2008 |
| 13   | 13,7 | 0,6 | 2 | 1 | 19 | 2013 |
| 11   | 8,3  | 0,6 | 2 | 1 | 23 | 2004 |
| 15,2 | 21,9 | 0,6 | 3 | 1 | 18 | 2002 |
| 15,2 | 21,9 | 0,6 | 4 | 1 | 24 | 2006 |
| 15,2 | 21,9 | 0,6 | 3 | 1 | 15 | 2015 |
| 11,3 | 9    | 0,6 | 2 | 1 | 23 | 2004 |
| 17,3 | 32,3 | 0,6 | 6 | 1 | 22 | 2003 |
| 13,8 | 16,4 | 0,6 | 3 | 1 | 23 | 2008 |
| 12,4 | 11,9 | 0,6 | 2 | 1 | 22 | 2004 |
| 12,4 | 11,9 | 0,6 | 3 | 1 | 25 | 2004 |
| 12,4 | 11,9 | 0,6 | 2 | 1 | 20 | 2006 |
| 12,4 | 11,9 | 0,6 | 2 | 1 | 21 | 2006 |
| 13,6 | 15,7 | 0,6 | 2 | 1 | 23 | 2015 |
| 12,9 | 13,4 | 0,6 | 3 | 1 | 23 | 2005 |
| 16,8 | 29,6 | 0,6 | 6 | 1 | 19 | 2001 |
| 15,4 | 22,8 | 0,6 | 5 | 1 | 19 | 2000 |
| 15,4 | 22,8 | 0,6 | 3 | 1 | 19 | 2001 |

|      |      |     |   |   |    |      |
|------|------|-----|---|---|----|------|
| 15,4 | 22,8 | 0,6 | 6 | 1 | 16 | 2015 |
| 15,6 | 23,7 | 0,6 | 3 | 1 | 20 | 2000 |
| 15,6 | 23,7 | 0,6 | 3 | 1 | 20 | 2002 |
| 14,1 | 17,5 | 0,6 | 2 | 1 | 22 | 2001 |
| 14,1 | 17,5 | 0,6 | 3 | 1 | 26 | 2003 |
| 14,1 | 17,5 | 0,6 | 2 | 1 | 16 | 2008 |
| 14,1 | 17,5 | 0,6 | 7 | 1 | 19 | 2009 |
| 15,9 | 25,1 | 0,6 | 4 | 1 | 19 | 2013 |
| 15,9 | 25,1 | 0,6 | 4 | 1 | 22 | 2013 |
| 15,1 | 21,5 | 0,6 | 3 | 1 | 18 | 2000 |
| 15,1 | 21,5 | 0,6 | 3 | 1 | 22 | 2001 |
| 12,5 | 12,2 | 0,6 | 2 | 1 | 22 | 2005 |
| 12,5 | 12,2 | 0,6 | 2 | 1 | 23 | 2010 |
| 12,5 | 12,2 | 0,6 | 2 | 1 | 23 | 2010 |
| 12,8 | 13,1 | 0,6 | 3 | 1 | 23 | 2003 |
| 12,8 | 13,1 | 0,6 | 3 | 1 | 21 | 2005 |
| 12,8 | 13,1 | 0,6 | 2 | 1 | 24 | 2006 |
| 12,8 | 13,1 | 0,6 | 2 | 1 | 19 | 2014 |
| 13,3 | 14,7 | 0,6 | 2 | 1 | 19 | 2000 |

|      |      |     |   |   |    |      |
|------|------|-----|---|---|----|------|
| 13,3 | 14,7 | 0,6 | 3 | 1 | 26 | 2003 |
| 13,3 | 14,7 | 0,6 | 2 | 1 | 22 | 2009 |
| 12,6 | 12,5 | 0,6 | 2 | 1 | 22 | 2002 |
| 12,6 | 12,5 | 0,6 | 2 | 1 | 24 | 2006 |
| 12,7 | 12,8 | 0,6 | 2 | 1 | 21 | 2003 |
| 12,7 | 12,8 | 0,6 | 4 | 1 | 20 | 2009 |
| 12,7 | 12,8 | 0,6 | 2 | 1 | 20 | 2009 |
| 16   | 25,6 | 0,6 | 5 | 1 | 19 | 2004 |
| 12   | 10,8 | 0,6 | 2 | 1 | 19 | 2006 |
| 12   | 10,8 | 0,6 | 2 | 1 | 21 | 2011 |
| 16   | 25,6 | 0,6 | 6 | 1 | 21 | 2013 |
| 14,2 | 17,9 | 0,6 | 3 | 1 | 18 | 2007 |
| 14,2 | 17,9 | 0,6 | 5 | 1 | 22 | 2007 |
| 14,2 | 17,9 | 0,6 | 3 | 1 | 20 | 2008 |
| 14,2 | 17,9 | 0,6 | 4 | 1 | 23 | 2008 |
| 14,2 | 17,9 | 0,6 | 4 | 1 | 20 | 2011 |
| 14,2 | 17,9 | 0,6 | 3 | 1 | 18 | 2014 |
| 14,2 | 17,9 | 0,6 | 3 | 1 | 19 | 2014 |
| 14,2 | 17,9 | 0,6 | 3 | 1 | 19 | 2015 |

|      |      |     |   |   |    |      |
|------|------|-----|---|---|----|------|
| 15   | 21,1 | 0,6 | 7 | 1 | 19 | 2002 |
| 15   | 21,1 | 0,6 | 3 | 1 | 22 | 2003 |
| 15   | 21,1 | 0,6 | 9 | 1 | 21 | 2005 |
| 15   | 21,1 | 0,6 | 5 | 1 | 23 | 2007 |
| 15   | 21,1 | 0,6 | 3 | 1 | 19 | 2012 |
| 15   | 21,1 | 0,6 | 3 | 1 | 21 | 2015 |
| 16,6 | 28,6 | 0,6 | 3 | 1 | 19 | 2000 |
| 16,6 | 28,6 | 0,6 | 5 | 1 | 20 | 2010 |
| 16,6 | 28,6 | 0,6 | 5 | 1 | 20 | 2010 |
| 15,7 | 24,2 | 0,6 | 6 | 1 | 19 | 1999 |
| 15,7 | 24,2 | 0,6 | 3 | 1 | 24 | 2001 |
| 15,7 | 24,2 | 0,6 | 4 | 1 | 24 | 2002 |
| 15,3 | 22,4 | 0,6 | 5 | 1 | 22 | 2011 |
| 17,6 | 34,1 | 0,6 | 5 | 1 | 19 | 2013 |
| 13,9 | 16,8 | 0,6 | 3 | 1 | 21 | 2008 |
| 13,9 | 16,8 | 0,6 | 2 | 1 | 20 | 2013 |
| 18,1 | 37,1 | 0,6 | 7 | 1 | 19 | 2015 |
| 15,5 | 23,3 | 0,6 | 7 | 1 | 23 | 2001 |
| 15,5 | 23,3 | 0,6 | 6 | 1 | 25 | 2005 |

|      |      |     |   |   |    |      |
|------|------|-----|---|---|----|------|
| 15,5 | 23,3 | 0,6 | 4 | 1 | 20 | 2013 |
| 16,4 | 27,6 | 0,6 | 4 | 1 | 18 | 2015 |
| 17,3 | 32,4 | 0,6 | 6 | 1 | 17 | 2002 |
| 14,9 | 20,7 | 0,6 | 4 | 1 | 20 | 1999 |
| 14,3 | 18,3 | 0,6 | 5 | 1 | 21 | 2000 |
| 14,3 | 18,3 | 0,6 | 3 | 1 | 18 | 2001 |
| 14,3 | 18,3 | 0,6 | 4 | 1 | 23 | 2002 |
| 14,3 | 18,3 | 0,6 | 3 | 1 | 21 | 2015 |
| 18   | 36,5 | 0,6 | 9 | 1 | 20 | 2010 |
| 18   | 36,5 | 0,6 | 9 | 1 | 20 | 2010 |
| 13,5 | 15,4 | 0,6 | 2 | 1 | 20 | 2000 |
| 13,5 | 15,4 | 0,6 | 3 | 1 | 20 | 2002 |
| 13,5 | 15,4 | 0,6 | 3 | 1 | 19 | 2014 |
| 17,1 | 31,3 | 0,6 | 6 | 1 | 15 | 2015 |
| 13,2 | 14,4 | 0,6 | 4 | 1 | 22 | 2004 |
| 13,2 | 14,4 | 0,6 | 2 | 1 | 24 | 2006 |
| 13,2 | 14,4 | 0,6 | 2 | 1 | 26 | 2009 |
| 13,2 | 14,4 | 0,6 | 2 | 1 | 21 | 2014 |
| 13,7 | 16,1 | 0,6 | 2 | 1 | 18 | 2002 |

|      |      |     |   |   |    |      |
|------|------|-----|---|---|----|------|
| 13,7 | 16,1 | 0,6 | 3 | 1 | 19 | 2008 |
| 13,7 | 16,1 | 0,6 | 3 | 1 | 21 | 2011 |
| 13,7 | 16,1 | 0,6 | 4 | 1 | 22 | 2011 |
| 13,7 | 16,1 | 0,6 | 2 | 1 | 17 | 2014 |
| 14,8 | 20,3 | 0,6 | 5 | 1 | 23 | 1999 |
| 14,8 | 20,3 | 0,6 | 3 | 1 | 25 | 2007 |
| 15,8 | 24,7 | 0,6 | 5 | 1 | 23 | 2003 |
| 14,4 | 18,7 | 0,6 | 3 | 1 | 21 | 2003 |
| 20,3 | 52,4 | 0,6 | 7 | 1 | 17 | 2012 |
| 15,2 | 22   | 0,6 | 5 | 1 | 20 | 2000 |
| 15,2 | 22   | 0,6 | 4 | 1 | 23 | 2011 |
| 15,2 | 22   | 0,6 | 4 | 1 | 21 | 2012 |
| 14,7 | 19,9 | 0,6 | 3 | 1 | 23 | 2002 |
| 14,7 | 19,9 | 0,6 | 4 | 1 | 25 | 2004 |
| 14,7 | 19,9 | 0,6 | 6 | 1 | 25 | 2005 |
| 14,7 | 19,9 | 0,6 | 5 | 1 | 20 | 2013 |
| 14,5 | 19,1 | 0,6 | 3 | 1 | 26 | 2001 |
| 14,5 | 19,1 | 0,6 | 7 | 1 | 19 | 2009 |
| 14,5 | 19,1 | 0,6 | 5 | 1 | 20 | 2009 |

|      |      |     |   |   |    |      |
|------|------|-----|---|---|----|------|
| 14,5 | 19,1 | 0,6 | 6 | 1 | 22 | 2009 |
| 12,1 | 11,1 | 0,6 | 2 | 1 | 18 | 2014 |
| 14,6 | 19,5 | 0,6 | 3 | 1 | 20 | 2004 |
| 14,6 | 19,5 | 0,6 | 6 | 1 | 20 | 2011 |
| 14   | 17,2 | 0,6 | 3 | 1 | 20 | 2001 |
| 14   | 17,2 | 0,6 | 3 | 1 | 25 | 2004 |
| 14   | 17,2 | 0,6 | 4 | 1 | 21 | 2005 |
| 14   | 17,2 | 0,6 | 3 | 1 | 18 | 2008 |
| 14   | 17,2 | 0,6 | 4 | 1 | 21 | 2011 |
| 14   | 17,2 | 0,6 | 3 | 1 | 19 | 2015 |
| 14   | 17,2 | 0,6 | 3 | 1 | 23 | 2015 |
| 11,8 | 10,3 | 0,6 | 1 | 1 | 23 | 2015 |
| 15,6 | 23,8 | 0,6 | 5 | 1 | 20 | 2013 |
| 15,6 | 23,8 | 0,6 | 6 | 1 | 18 | 2015 |
| 15,9 | 25,2 | 0,6 | 5 | 1 | 22 | 2013 |
| 15,4 | 22,9 | 0,6 | 4 | 1 | 18 | 2015 |
| 18,2 | 37,8 | 0,6 | 6 | 1 | 19 | 2013 |
| 13,1 | 14,1 | 0,6 | 2 | 1 | 24 | 2001 |
| 13,1 | 14,1 | 0,6 | 2 | 1 | 24 | 2006 |

|      |      |     |   |   |    |      |
|------|------|-----|---|---|----|------|
| 13,1 | 14,1 | 0,6 | 2 | 1 | 22 | 2009 |
| 15,1 | 21,6 | 0,6 | 9 | 1 | 23 | 2007 |
| 16   | 25,7 | 0,6 | 5 | 1 | 21 | 1999 |
| 16   | 25,7 | 0,6 | 5 | 1 | 25 | 2004 |
| 17,3 | 32,5 | 0,6 | 3 | 1 | 18 | 2015 |
| 16,5 | 28,2 | 0,6 | 5 | 1 | 25 | 2004 |
| 16,5 | 28,2 | 0,6 | 4 | 1 | 18 | 2015 |
| 12,2 | 11,4 | 0,6 | 2 | 1 | 23 | 2003 |
| 12,2 | 11,4 | 0,6 | 2 | 1 | 24 | 2006 |
| 12,2 | 11,4 | 0,6 | 2 | 1 | 19 | 2007 |
| 13,8 | 16,5 | 0,6 | 2 | 1 | 22 | 2001 |
| 13,8 | 16,5 | 0,6 | 3 | 1 | 18 | 2015 |
| 11,6 | 9,8  | 0,6 | 2 | 1 | 22 | 2011 |
| 14,1 | 17,6 | 0,6 | 2 | 1 | 25 | 2002 |
| 14,1 | 17,6 | 0,6 | 4 | 1 | 25 | 2007 |
| 14,1 | 17,6 | 0,6 | 3 | 1 | 18 | 2014 |
| 15,7 | 24,3 | 0,6 | 3 | 1 | 20 | 2013 |
| 17,1 | 31,4 | 0,6 | 4 | 1 | 21 | 2015 |
| 13   | 13,8 | 0,6 | 5 | 1 | 23 | 1999 |

|      |      |     |   |   |    |      |
|------|------|-----|---|---|----|------|
| 13   | 13,8 | 0,6 | 3 | 1 | 23 | 2005 |
| 13   | 13,8 | 0,6 | 5 | 1 | 25 | 2007 |
| 13   | 13,8 | 0,6 | 3 | 1 | 18 | 2008 |
| 13   | 13,8 | 0,6 | 2 | 1 | 21 | 2008 |
| 13   | 13,8 | 0,6 | 4 | 1 | 23 | 2009 |
| 13   | 13,8 | 0,6 | 2 | 1 | 26 | 2009 |
| 13   | 13,8 | 0,6 | 3 | 1 | 21 | 2015 |
| 15   | 21,2 | 0,6 | 7 | 1 | 21 | 1999 |
| 15   | 21,2 | 0,6 | 3 | 1 | 20 | 2000 |
| 15   | 21,2 | 0,6 | 4 | 1 | 20 | 2006 |
| 15   | 21,2 | 0,6 | 3 | 1 | 18 | 2007 |
| 15   | 21,2 | 0,6 | 5 | 1 | 21 | 2012 |
| 15   | 21,2 | 0,6 | 5 | 1 | 19 | 2012 |
| 15,3 | 22,5 | 0,6 | 3 | 1 | 20 | 2000 |
| 15,3 | 22,5 | 0,6 | 5 | 1 | 22 | 2000 |
| 15,5 | 23,4 | 0,6 | 3 | 1 | 18 | 2000 |
| 15,5 | 23,4 | 0,6 | 5 | 1 | 19 | 2002 |
| 15,5 | 23,4 | 0,6 | 4 | 1 | 23 | 2015 |
| 16,8 | 29,8 | 0,6 | 4 | 1 | 19 | 2012 |

|      |      |     |   |   |    |      |
|------|------|-----|---|---|----|------|
| 14,2 | 18   | 0,6 | 3 | 1 | 24 | 2002 |
| 14,2 | 18   | 0,6 | 3 | 1 | 24 | 2002 |
| 14,2 | 18   | 0,6 | 6 | 1 | 23 | 2007 |
| 14,2 | 18   | 0,6 | 4 | 1 | 21 | 2011 |
| 14,2 | 18   | 0,6 | 3 | 1 | 19 | 2012 |
| 12,3 | 11,7 | 0,6 | 2 | 1 | 26 | 1999 |
| 12,3 | 11,7 | 0,6 | 3 | 1 | 22 | 2005 |
| 12,3 | 11,7 | 0,6 | 3 | 1 | 23 | 2005 |
| 12,3 | 11,7 | 0,6 | 2 | 1 | 26 | 2009 |
| 12,3 | 11,7 | 0,6 | 2 | 1 | 23 | 2010 |
| 12,3 | 11,7 | 0,6 | 2 | 1 | 23 | 2010 |
| 12,3 | 11,7 | 0,6 | 2 | 1 | 21 | 2014 |
| 15,8 | 24,8 | 0,6 | 3 | 1 | 18 | 1999 |
| 15,8 | 24,8 | 0,6 | 5 | 1 | 19 | 2012 |
| 14,9 | 20,8 | 0,6 | 3 | 1 | 22 | 2004 |
| 11,1 | 8,6  | 0,6 | 2 | 1 | 25 | 2004 |
| 12,9 | 13,5 | 0,6 | 4 | 1 | 20 | 2006 |
| 12,9 | 13,5 | 0,6 | 3 | 1 | 23 | 2007 |
| 12,9 | 13,5 | 0,6 | 2 | 1 | 20 | 2013 |

|      |      |     |   |   |    |      |
|------|------|-----|---|---|----|------|
| 12,9 | 13,5 | 0,6 | 2 | 1 | 17 | 2014 |
| 11,9 | 10,6 | 0,6 | 2 | 1 | 22 | 2007 |
| 13,3 | 14,8 | 0,6 | 3 | 1 | 20 | 2008 |
| 13,3 | 14,8 | 0,6 | 3 | 1 | 21 | 2008 |
| 14,3 | 18,4 | 0,6 | 3 | 1 | 23 | 1999 |
| 14,3 | 18,4 | 0,6 | 3 | 1 | 22 | 2003 |
| 14,3 | 18,4 | 0,6 | 3 | 1 | 22 | 2003 |
| 14,3 | 18,4 | 0,6 | 3 | 1 | 18 | 2014 |
| 14,3 | 18,4 | 0,6 | 3 | 1 | 23 | 2015 |
| 9,2  | 4,9  | 0,6 | 1 | 1 | 20 | 2004 |
| 20,1 | 51,1 | 0,6 | 7 | 1 | 18 | 2012 |
| 13,9 | 16,9 | 0,6 | 4 | 1 | 22 | 2013 |
| 13,9 | 16,9 | 0,6 | 3 | 1 | 19 | 2014 |
| 14,8 | 20,4 | 0,6 | 3 | 1 | 26 | 2003 |
| 18   | 36,7 | 0,6 | 4 | 1 | 18 | 2012 |
| 15,2 | 22,1 | 0,6 | 5 | 1 | 19 | 1999 |
| 15,2 | 22,1 | 0,6 | 5 | 1 | 25 | 1999 |
| 15,2 | 22,1 | 0,6 | 5 | 1 | 19 | 2006 |
| 15,2 | 22,1 | 0,6 | 3 | 1 | 17 | 2008 |

|      |      |     |   |   |    |      |
|------|------|-----|---|---|----|------|
| 12,4 | 12   | 0,6 | 3 | 1 | 26 | 1999 |
| 12,4 | 12   | 0,6 | 2 | 1 | 19 | 2002 |
| 12,4 | 12   | 0,6 | 2 | 1 | 20 | 2013 |
| 12,4 | 12   | 0,6 | 2 | 1 | 23 | 2015 |
| 12,8 | 13,2 | 0,6 | 2 | 1 | 18 | 2014 |
| 15,6 | 23,9 | 0,6 | 4 | 1 | 18 | 1999 |
| 16,6 | 28,8 | 0,6 | 5 | 1 | 20 | 2000 |
| 14,7 | 20   | 0,6 | 4 | 1 | 18 | 1999 |
| 14,7 | 20   | 0,6 | 4 | 1 | 25 | 2003 |
| 14,7 | 20   | 0,6 | 4 | 1 | 20 | 2009 |
| 14,7 | 20   | 0,6 | 3 | 1 | 15 | 2015 |
| 12,7 | 12,9 | 0,6 | 2 | 1 | 26 | 2000 |
| 12,7 | 12,9 | 0,6 | 2 | 1 | 18 | 2002 |
| 12,7 | 12,9 | 0,6 | 2 | 1 | 26 | 2009 |
| 12,7 | 12,9 | 0,6 | 2 | 1 | 19 | 2011 |
| 14,5 | 19,2 | 0,6 | 4 | 1 | 21 | 2011 |
| 14,6 | 19,6 | 0,6 | 3 | 1 | 23 | 2003 |
| 14,6 | 19,6 | 0,6 | 2 | 1 | 19 | 2014 |
| 16,9 | 30,4 | 0,6 | 5 | 1 | 22 | 2013 |

|      |      |     |   |   |    |      |
|------|------|-----|---|---|----|------|
| 9,5  | 5,4  | 0,6 | 1 | 1 | 23 | 2005 |
| 12,6 | 12,6 | 0,6 | 3 | 1 | 23 | 2005 |
| 12,6 | 12,6 | 0,6 | 2 | 1 | 23 | 2006 |
| 12,6 | 12,6 | 0,6 | 2 | 1 | 18 | 2014 |
| 16   | 25,8 | 0,6 | 9 | 1 | 19 | 2013 |
| 17,1 | 31,5 | 0,6 | 9 | 1 | 22 | 2000 |
| 13,5 | 15,5 | 0,6 | 4 | 1 | 26 | 2000 |
| 13,5 | 15,5 | 0,6 | 2 | 1 | 19 | 2013 |
| 20   | 50,4 | 0,6 | 7 | 1 | 17 | 2014 |
| 13,7 | 16,2 | 0,6 | 3 | 1 | 18 | 2015 |
| 16,1 | 26,3 | 0,6 | 4 | 1 | 23 | 2002 |
| 16,1 | 26,3 | 0,6 | 4 | 1 | 19 | 2007 |
| 15,1 | 21,7 | 0,6 | 5 | 1 | 21 | 2001 |
| 15,1 | 21,7 | 0,6 | 6 | 1 | 21 | 2011 |
| 16,2 | 26,8 | 0,6 | 6 | 1 | 19 | 2001 |
| 16,3 | 27,3 | 0,6 | 4 | 1 | 17 | 2002 |
| 16,3 | 27,3 | 0,6 | 4 | 1 | 17 | 2014 |
| 13,2 | 14,5 | 0,6 | 2 | 1 | 26 | 2003 |
| 13,2 | 14,5 | 0,6 | 2 | 1 | 23 | 2011 |

|      |      |     |   |   |    |      |
|------|------|-----|---|---|----|------|
| 13,2 | 14,5 | 0,6 | 2 | 1 | 17 | 2014 |
| 14   | 17,3 | 0,6 | 3 | 1 | 20 | 2002 |
| 14   | 17,3 | 0,6 | 5 | 1 | 19 | 2009 |
| 14   | 17,3 | 0,6 | 4 | 1 | 24 | 2009 |
| 14   | 17,3 | 0,6 | 4 | 1 | 24 | 2009 |
| 15,7 | 24,4 | 0,6 | 6 | 1 | 23 | 2011 |
| 15,7 | 24,4 | 0,6 | 7 | 1 | 19 | 2012 |
| 11,3 | 9,1  | 0,6 | 2 | 1 | 22 | 2007 |
| 12   | 10,9 | 0,6 | 2 | 1 | 26 | 2006 |
| 12   | 10,9 | 0,6 | 2 | 1 | 19 | 2011 |
| 12   | 10,9 | 0,6 | 2 | 1 | 19 | 2013 |
| 17,2 | 32,1 | 0,6 | 5 | 1 | 23 | 2002 |
| 18,4 | 39,3 | 0,6 | 6 | 1 | 19 | 2013 |
| 10,1 | 6,5  | 0,6 | 1 | 1 | 21 | 2009 |
| 17   | 31   | 0,6 | 6 | 1 | 18 | 2000 |
| 17   | 31   | 0,6 | 5 | 1 | 22 | 2013 |
| 15,3 | 22,6 | 0,6 | 5 | 1 | 25 | 2005 |
| 15,3 | 22,6 | 0,6 | 4 | 1 | 22 | 2011 |
| 15,5 | 23,5 | 0,6 | 4 | 1 | 27 | 1999 |

|      |      |     |    |   |    |      |
|------|------|-----|----|---|----|------|
| 11   | 8,4  | 0,6 | 2  | 1 | 23 | 2004 |
| 15   | 21,3 | 0,6 | 7  | 1 | 21 | 1999 |
| 15   | 21,3 | 0,6 | 3  | 1 | 22 | 2003 |
| 15   | 21,3 | 0,6 | 3  | 1 | 20 | 2006 |
| 15   | 21,3 | 0,6 | 7  | 1 | 20 | 2009 |
| 15   | 21,3 | 0,6 | 6  | 1 | 21 | 2010 |
| 15   | 21,3 | 0,6 | 8  | 1 | 23 | 2010 |
| 15   | 21,3 | 0,6 | 6  | 1 | 21 | 2010 |
| 15   | 21,3 | 0,6 | 8  | 1 | 23 | 2010 |
| 11,5 | 9,6  | 0,6 | 2  | 1 | 23 | 2007 |
| 17,8 | 35,6 | 0,6 | 4  | 1 | 19 | 2012 |
| 16,7 | 29,4 | 0,6 | 4  | 1 | 20 | 2003 |
| 16,7 | 29,4 | 0,6 | 3  | 1 | 20 | 2003 |
| 16,7 | 29,4 | 0,6 | 10 | 1 | 23 | 2008 |
| 16,7 | 29,4 | 0,6 | 4  | 1 | 15 | 2015 |
| 20   | 50,5 | 0,6 | 6  | 1 | 19 | 2013 |
| 15,8 | 24,9 | 0,6 | 5  | 1 | 19 | 2012 |
| 14,1 | 17,7 | 0,6 | 5  | 1 | 23 | 2010 |
| 14,1 | 17,7 | 0,6 | 5  | 1 | 23 | 2010 |

|      |      |     |    |   |    |      |
|------|------|-----|----|---|----|------|
| 14,1 | 17,7 | 0,6 | 3  | 1 | 18 | 2014 |
| 14,1 | 17,7 | 0,6 | 3  | 1 | 15 | 2015 |
| 14,1 | 17,7 | 0,6 | 3  | 1 | 15 | 2015 |
| 18,3 | 38,7 | 0,6 | 5  | 1 | 19 | 2013 |
| 17,3 | 32,7 | 0,6 | 7  | 1 | 22 | 2001 |
| 13,8 | 16,6 | 0,6 | 4  | 1 | 19 | 1999 |
| 13,8 | 16,6 | 0,6 | 2  | 1 | 21 | 2008 |
| 13,8 | 16,6 | 0,6 | 2  | 1 | 25 | 2008 |
| 13,1 | 14,2 | 0,6 | 4  | 1 | 23 | 2006 |
| 13,1 | 14,2 | 0,6 | 3  | 1 | 25 | 2007 |
| 13,1 | 14,2 | 0,6 | 2  | 1 | 18 | 2008 |
| 13,1 | 14,2 | 0,6 | 3  | 1 | 20 | 2008 |
| 13,1 | 14,2 | 0,6 | 2  | 1 | 21 | 2014 |
| 13,1 | 14,2 | 0,6 | 2  | 1 | 23 | 2014 |
| 20,1 | 51,3 | 0,6 | 8  | 1 | 19 | 2013 |
| 13,4 | 15,2 | 0,6 | 3  | 1 | 20 | 2002 |
| 16,9 | 30,5 | 0,6 | 10 | 1 | 21 | 2013 |
| 14,2 | 18,1 | 0,6 | 2  | 1 | 22 | 2000 |
| 14,2 | 18,1 | 0,6 | 4  | 1 | 23 | 2005 |

|      |      |     |   |   |    |      |
|------|------|-----|---|---|----|------|
| 14,2 | 18,1 | 0,6 | 3 | 1 | 18 | 2008 |
| 14,2 | 18,1 | 0,6 | 3 | 1 | 20 | 2008 |
| 14,2 | 18,1 | 0,6 | 3 | 1 | 15 | 2015 |
| 15,2 | 22,2 | 0,6 | 3 | 1 | 22 | 2001 |
| 15,2 | 22,2 | 0,6 | 3 | 1 | 21 | 2008 |
| 15,2 | 22,2 | 0,6 | 3 | 1 | 16 | 2015 |
| 15,6 | 24   | 0,6 | 3 | 1 | 19 | 2000 |
| 12,1 | 11,2 | 0,6 | 3 | 1 | 23 | 2005 |
| 12,1 | 11,2 | 0,6 | 2 | 1 | 23 | 2007 |
| 12,1 | 11,2 | 0,6 | 2 | 1 | 23 | 2009 |
| 16,5 | 28,4 | 0,6 | 6 | 1 | 22 | 2001 |
| 16,5 | 28,4 | 0,6 | 6 | 1 | 20 | 2013 |
| 16   | 25,9 | 0,6 | 7 | 1 | 21 | 2011 |
| 16   | 25,9 | 0,6 | 4 | 1 | 22 | 2011 |
| 16   | 25,9 | 0,6 | 6 | 1 | 22 | 2013 |
| 14,8 | 20,5 | 0,6 | 4 | 1 | 20 | 2011 |
| 18,4 | 39,4 | 0,6 | 8 | 1 | 19 | 2015 |
| 15,4 | 23,1 | 0,6 | 5 | 1 | 22 | 1999 |
| 15,4 | 23,1 | 0,6 | 4 | 1 | 18 | 2000 |

|      |      |     |   |   |    |      |
|------|------|-----|---|---|----|------|
| 15,4 | 23,1 | 0,6 | 4 | 1 | 20 | 2003 |
| 15,4 | 23,1 | 0,6 | 4 | 1 | 18 | 2007 |
| 15,4 | 23,1 | 0,6 | 4 | 1 | 16 | 2015 |
| 16,1 | 26,4 | 0,6 | 3 | 1 | 26 | 2001 |
| 16,1 | 26,4 | 0,6 | 5 | 1 | 19 | 2004 |
| 20,5 | 54,5 | 0,6 | 5 | 1 | 19 | 2010 |
| 20,5 | 54,5 | 0,6 | 5 | 1 | 19 | 2010 |
| 14,3 | 18,5 | 0,6 | 4 | 1 | 22 | 1999 |
| 14,3 | 18,5 | 0,6 | 2 | 1 | 21 | 2000 |
| 14,3 | 18,5 | 0,6 | 3 | 1 | 18 | 2002 |
| 14,3 | 18,5 | 0,6 | 3 | 1 | 19 | 2002 |
| 14,3 | 18,5 | 0,6 | 2 | 1 | 18 | 2012 |
| 13   | 13,9 | 0,6 | 2 | 1 | 20 | 2002 |
| 13   | 13,9 | 0,6 | 3 | 1 | 23 | 2007 |
| 13   | 13,9 | 0,6 | 3 | 1 | 25 | 2007 |
| 13   | 13,9 | 0,6 | 3 | 1 | 25 | 2007 |
| 13   | 13,9 | 0,6 | 3 | 1 | 20 | 2008 |
| 13   | 13,9 | 0,6 | 2 | 1 | 19 | 2013 |
| 13   | 13,9 | 0,6 | 2 | 1 | 19 | 2013 |

|      |      |     |   |   |    |      |
|------|------|-----|---|---|----|------|
| 13   | 13,9 | 0,6 | 2 | 1 | 21 | 2014 |
| 16,3 | 27,4 | 0,6 | 7 | 1 | 20 | 1999 |
| 16,3 | 27,4 | 0,6 | 6 | 1 | 23 | 2002 |
| 16,8 | 30   | 0,6 | 3 | 1 | 15 | 2015 |
| 16,2 | 26,9 | 0,6 | 5 | 1 | 20 | 1999 |
| 16,2 | 26,9 | 0,6 | 4 | 1 | 18 | 2015 |
| 14,7 | 20,1 | 0,6 | 4 | 1 | 21 | 1999 |
| 14,7 | 20,1 | 0,6 | 4 | 1 | 21 | 2003 |
| 17,9 | 36,3 | 0,6 | 6 | 1 | 19 | 2012 |
| 14,4 | 18,9 | 0,6 | 4 | 1 | 19 | 1999 |
| 14,4 | 18,9 | 0,6 | 3 | 1 | 18 | 2014 |
| 11,8 | 10,4 | 0,6 | 2 | 1 | 21 | 2005 |
| 11,8 | 10,4 | 0,6 | 3 | 1 | 21 | 2005 |
| 14,6 | 19,7 | 0,6 | 2 | 1 | 19 | 2000 |
| 14,6 | 19,7 | 0,6 | 3 | 1 | 25 | 2003 |
| 14,6 | 19,7 | 0,6 | 4 | 1 | 19 | 2012 |
| 14,5 | 19,3 | 0,6 | 4 | 1 | 25 | 2004 |
| 13,3 | 14,9 | 0,6 | 2 | 1 | 20 | 2000 |
| 13,3 | 14,9 | 0,6 | 3 | 1 | 18 | 2014 |

|      |      |     |   |   |    |      |
|------|------|-----|---|---|----|------|
| 16,7 | 29,5 | 0,6 | 6 | 1 | 22 | 2003 |
| 11,2 | 8,9  | 0,6 | 2 | 1 | 23 | 2008 |
| 12,9 | 13,6 | 0,6 | 3 | 1 | 21 | 2005 |
| 12,9 | 13,6 | 0,6 | 2 | 1 | 21 | 2006 |
| 12,9 | 13,6 | 0,6 | 3 | 1 | 19 | 2012 |
| 15,5 | 23,6 | 0,6 | 3 | 1 | 21 | 2001 |
| 15,3 | 22,7 | 0,6 | 4 | 1 | 22 | 2001 |
| 15,3 | 22,7 | 0,6 | 3 | 1 | 24 | 2001 |
| 15,3 | 22,7 | 0,6 | 3 | 1 | 19 | 2008 |
| 15,8 | 25   | 0,6 | 5 | 1 | 19 | 2001 |
| 13,7 | 16,3 | 0,6 | 2 | 1 | 24 | 2006 |
| 13,7 | 16,3 | 0,6 | 7 | 1 | 19 | 2012 |
| 13,7 | 16,3 | 0,6 | 3 | 1 | 21 | 2015 |
| 16,6 | 29   | 0,6 | 5 | 1 | 18 | 2000 |
| 18,6 | 40,8 | 0,6 | 5 | 1 | 21 | 2010 |
| 18,6 | 40,8 | 0,6 | 5 | 1 | 21 | 2010 |
| 13,5 | 15,6 | 0,6 | 4 | 1 | 21 | 2006 |
| 13,5 | 15,6 | 0,6 | 4 | 1 | 23 | 2006 |
| 13,5 | 15,6 | 0,6 | 3 | 1 | 26 | 2009 |

|      |      |     |     |   |    |      |
|------|------|-----|-----|---|----|------|
| 15   | 21,4 | 0,6 | 5   | 1 | 21 | 2000 |
| 15   | 21,4 | 0,6 | 5   | 1 | 21 | 2000 |
| 15   | 21,4 | 0,6 | 3   | 1 | 26 | 2001 |
| 15   | 21,4 | 0,6 | 4   | 1 | 19 | 2011 |
| 15   | 21,4 | 0,6 | 4   | 1 | 19 | 2012 |
| 15   | 21,4 | 0,6 | 4   | 1 | 20 | 2013 |
| 14   | 17,4 | 0,6 | 3   | 1 | 22 | 2000 |
| 14   | 17,4 | 0,6 | 2   | 1 | 26 | 2000 |
| 14   | 17,4 | 0,6 | 3   | 1 | 18 | 2008 |
| 14   | 17,4 | 0,6 | 3   | 1 | 23 | 2008 |
| 14   | 17,4 | 0,6 | 4   | 1 | 23 | 2009 |
| 14   | 17,4 | 0,6 | 3   | 1 | 15 | 2015 |
| 12,3 | 11,8 | 0,6 | 2   | 1 | 19 | 2013 |
| 12,8 | 13,3 | 0,6 | 3   | 1 | 25 | 2007 |
| 19,3 | 45,6 | 0,6 | 10+ | 1 | 17 | 2014 |
| 18   | 37   | 0,6 | 5   | 1 | 17 | 2014 |
| 16,5 | 28,5 | 0,6 | 6   | 1 | 23 | 2002 |
| 16,5 | 28,5 | 0,6 | 8   | 1 | 25 | 2008 |
| 11,4 | 9,4  | 0,6 | 2   | 1 | 23 | 2007 |

|      |      |     |   |   |    |      |
|------|------|-----|---|---|----|------|
| 12,4 | 12,1 | 0,6 | 2 | 1 | 23 | 1999 |
| 12,4 | 12,1 | 0,6 | 2 | 1 | 21 | 2009 |
| 12,7 | 13   | 0,6 | 2 | 1 | 26 | 1999 |
| 12,7 | 13   | 0,6 | 2 | 1 | 19 | 2000 |
| 12,7 | 13   | 0,6 | 2 | 1 | 20 | 2002 |
| 12,7 | 13   | 0,6 | 2 | 1 | 18 | 2014 |
| 16   | 26   | 0,6 | 5 | 1 | 18 | 1999 |
| 13,2 | 14,6 | 0,6 | 3 | 1 | 23 | 2005 |
| 13,2 | 14,6 | 0,6 | 3 | 1 | 25 | 2007 |
| 13,2 | 14,6 | 0,6 | 2 | 1 | 24 | 2009 |
| 13,2 | 14,6 | 0,6 | 2 | 1 | 18 | 2014 |
| 15,6 | 24,1 | 0,6 | 6 | 1 | 20 | 2001 |
| 15,6 | 24,1 | 0,6 | 5 | 1 | 20 | 2001 |
| 15,6 | 24,1 | 0,6 | 3 | 1 | 21 | 2003 |
| 14,9 | 21   | 0,6 | 5 | 1 | 18 | 2007 |
| 14,9 | 21   | 0,6 | 3 | 1 | 19 | 2012 |
| 12,5 | 12,4 | 0,6 | 3 | 1 | 23 | 1999 |
| 12,5 | 12,4 | 0,6 | 2 | 1 | 23 | 2011 |
| 12,6 | 12,7 | 0,6 | 2 | 1 | 19 | 2013 |

|      |      |     |   |   |    |      |
|------|------|-----|---|---|----|------|
| 11,9 | 10,7 | 0,6 | 1 | 1 | 26 | 2001 |
| 11,9 | 10,7 | 0,6 | 2 | 1 | 21 | 2006 |
| 14,1 | 17,8 | 0,6 | 3 | 1 | 20 | 2001 |
| 14,1 | 17,8 | 0,6 | 4 | 1 | 19 | 2006 |
| 14,1 | 17,8 | 0,6 | 4 | 1 | 19 | 2009 |
| 14,1 | 17,8 | 0,6 | 6 | 1 | 20 | 2011 |
| 14,1 | 17,8 | 0,6 | 3 | 1 | 21 | 2011 |
| 14,1 | 17,8 | 0,6 | 3 | 1 | 19 | 2012 |
| 14,1 | 17,8 | 0,6 | 3 | 1 | 15 | 2015 |
| 16,1 | 26,5 | 0,6 | 4 | 1 | 20 | 2013 |
| 15,2 | 22,3 | 0,6 | 5 | 1 | 23 | 1999 |
| 15,2 | 22,3 | 0,6 | 4 | 1 | 22 | 2015 |
| 18,8 | 42,2 | 0,6 | 4 | 1 | 19 | 2010 |
| 18,8 | 42,2 | 0,6 | 4 | 1 | 19 | 2010 |
| 15,4 | 23,2 | 0,6 | 4 | 1 | 26 | 1999 |
| 15,4 | 23,2 | 0,6 | 4 | 1 | 20 | 2006 |
| 15,4 | 23,2 | 0,6 | 3 | 1 | 19 | 2013 |
| 13,8 | 16,7 | 0,6 | 3 | 1 | 22 | 2005 |
| 13,8 | 16,7 | 0,6 | 3 | 1 | 18 | 2008 |

|      |      |     |   |   |    |      |
|------|------|-----|---|---|----|------|
| 14,8 | 20,6 | 0,6 | 3 | 1 | 23 | 2001 |
| 14,2 | 18,2 | 0,6 | 4 | 1 | 18 | 1999 |
| 14,2 | 18,2 | 0,6 | 6 | 1 | 23 | 2008 |
| 19   | 43,6 | 0,6 | 4 | 1 | 17 | 2014 |
| 15,7 | 24,6 | 0,6 | 4 | 1 | 20 | 1999 |
| 15,7 | 24,6 | 0,6 | 4 | 1 | 19 | 2001 |
| 15,7 | 24,6 | 0,6 | 5 | 1 | 22 | 2001 |
| 15,7 | 24,6 | 0,6 | 4 | 1 | 23 | 2002 |
| 15,7 | 24,6 | 0,6 | 6 | 1 | 25 | 2004 |
| 15,7 | 24,6 | 0,6 | 4 | 1 | 19 | 2013 |
| 19,7 | 48,6 | 0,6 | 5 | 1 | 19 | 2010 |
| 19,7 | 48,6 | 0,6 | 5 | 1 | 19 | 2010 |
| 19,3 | 45,7 | 0,6 | 8 | 1 | 19 | 2013 |
| 18,1 | 37,7 | 0,6 | 8 | 1 | 22 | 2013 |
| 13,4 | 15,3 | 0,6 | 3 | 1 | 25 | 2005 |
| 13,4 | 15,3 | 0,6 | 2 | 1 | 19 | 2013 |
| 17,4 | 33,5 | 0,6 | 7 | 1 | 19 | 2014 |
| 14,7 | 20,2 | 0,6 | 4 | 1 | 18 | 1999 |
| 14,7 | 20,2 | 0,6 | 3 | 1 | 15 | 2015 |

|      |      |     |   |   |    |      |
|------|------|-----|---|---|----|------|
| 13,6 | 16   | 0,6 | 3 | 1 | 19 | 2002 |
| 13,6 | 16   | 0,6 | 4 | 1 | 23 | 2005 |
| 13,6 | 16   | 0,6 | 2 | 1 | 21 | 2006 |
| 13,6 | 16   | 0,6 | 2 | 1 | 24 | 2009 |
| 13,6 | 16   | 0,6 | 2 | 1 | 19 | 2012 |
| 14,3 | 18,6 | 0,6 | 5 | 1 | 22 | 1999 |
| 14,3 | 18,6 | 0,6 | 4 | 1 | 26 | 1999 |
| 14,3 | 18,6 | 0,6 | 4 | 1 | 25 | 2003 |
| 14,3 | 18,6 | 0,6 | 4 | 1 | 19 | 2009 |
| 14,3 | 18,6 | 0,6 | 4 | 1 | 24 | 2009 |
| 14,3 | 18,6 | 0,6 | 6 | 1 | 23 | 2011 |
| 14,3 | 18,6 | 0,6 | 3 | 1 | 19 | 2014 |
| 15,1 | 21,9 | 0,6 | 4 | 1 | 19 | 2012 |
| 14,6 | 19,8 | 0,6 | 5 | 1 | 22 | 2005 |
| 14,6 | 19,8 | 0,6 | 7 | 1 | 23 | 2009 |
| 14,4 | 19   | 0,6 | 4 | 1 | 18 | 2002 |
| 14,4 | 19   | 0,6 | 3 | 1 | 21 | 2003 |
| 14,4 | 19   | 0,6 | 4 | 1 | 22 | 2003 |
| 14,4 | 19   | 0,6 | 3 | 1 | 22 | 2003 |

|      |      |     |    |   |    |      |
|------|------|-----|----|---|----|------|
| 14,4 | 19   | 0,6 | 4  | 1 | 19 | 2014 |
| 14,5 | 19,4 | 0,6 | 3  | 1 | 24 | 2001 |
| 14,5 | 19,4 | 0,6 | 4  | 1 | 20 | 2006 |
| 14,5 | 19,4 | 0,6 | 6  | 1 | 24 | 2006 |
| 15,8 | 25,1 | 0,6 | 3  | 1 | 26 | 2003 |
| 15,5 | 23,7 | 0,6 | 4  | 1 | 22 | 1999 |
| 19,5 | 47,2 | 0,6 | 8  | 1 | 20 | 2013 |
| 12   | 11   | 0,6 | 2  | 1 | 19 | 2006 |
| 12   | 11   | 0,6 | 2  | 1 | 23 | 2009 |
| 15,3 | 22,8 | 0,6 | 5  | 1 | 22 | 2001 |
| 15,3 | 22,8 | 0,6 | 3  | 1 | 20 | 2003 |
| 13,9 | 17,1 | 0,6 | 3  | 1 | 18 | 2008 |
| 13,9 | 17,1 | 0,6 | 3  | 1 | 22 | 2015 |
| 11,7 | 10,2 | 0,6 | 2  | 1 | 23 | 2004 |
| 11,7 | 10,2 | 0,6 | 2  | 1 | 25 | 2004 |
| 15,9 | 25,6 | 0,6 | 10 | 1 | 26 | 2005 |
| 16,8 | 30,2 | 0,6 | 4  | 1 | 20 | 2003 |
| 15   | 21,5 | 0,6 | 3  | 1 | 26 | 2003 |
| 16   | 26,1 | 0,6 | 5  | 1 | 20 | 1999 |

|      |      |     |   |   |    |      |
|------|------|-----|---|---|----|------|
| 16   | 26,1 | 0,6 | 3 | 1 | 19 | 2012 |
| 16   | 26,1 | 0,6 | 4 | 1 | 21 | 2012 |
| 16   | 26,1 | 0,6 | 7 | 1 | 21 | 2014 |
| 13   | 14   | 0,6 | 2 | 1 | 25 | 2005 |
| 13   | 14   | 0,6 | 2 | 1 | 26 | 2009 |
| 16,1 | 26,6 | 0,6 | 8 | 1 | 19 | 2002 |
| 16,1 | 26,6 | 0,6 | 5 | 1 | 17 | 2012 |
| 16,1 | 26,6 | 0,6 | 5 | 1 | 18 | 2012 |
| 16,2 | 27,1 | 0,6 | 4 | 1 | 25 | 2004 |
| 15,6 | 24,2 | 0,6 | 3 | 1 | 21 | 2001 |
| 15,6 | 24,2 | 0,6 | 6 | 1 | 22 | 2001 |
| 15,6 | 24,2 | 0,6 | 4 | 1 | 19 | 2013 |
| 18,1 | 37,8 | 0,6 | 7 | 1 | 18 | 2012 |
| 20   | 51   | 0,6 | 7 | 1 | 17 | 2012 |
| 13,3 | 15   | 0,6 | 2 | 1 | 19 | 2000 |
| 13,3 | 15   | 0,6 | 2 | 1 | 21 | 2000 |
| 13,3 | 15   | 0,6 | 2 | 1 | 24 | 2002 |
| 13,3 | 15   | 0,6 | 2 | 1 | 22 | 2013 |
| 11,3 | 9,2  | 0,6 | 2 | 1 | 20 | 2004 |

|      |      |     |   |   |    |      |
|------|------|-----|---|---|----|------|
| 16,7 | 29,7 | 0,6 | 5 | 1 | 26 | 2000 |
| 16,7 | 29,7 | 0,6 | 7 | 1 | 19 | 2001 |
| 14   | 17,5 | 0,6 | 5 | 1 | 19 | 2000 |
| 14   | 17,5 | 0,6 | 2 | 1 | 17 | 2012 |
| 14   | 17,5 | 0,6 | 3 | 1 | 18 | 2014 |
| 13,7 | 16,4 | 0,6 | 4 | 1 | 25 | 1999 |
| 13,7 | 16,4 | 0,6 | 3 | 1 | 19 | 2000 |
| 13,7 | 16,4 | 0,6 | 3 | 1 | 25 | 2004 |
| 17,4 | 33,6 | 0,6 | 9 | 1 | 26 | 1999 |
| 17,4 | 33,6 | 0,6 | 5 | 1 | 19 | 2000 |
| 15,2 | 22,4 | 0,6 | 5 | 1 | 19 | 2000 |
| 15,2 | 22,4 | 0,6 | 3 | 1 | 25 | 2003 |
| 15,2 | 22,4 | 0,6 | 5 | 1 | 18 | 2007 |
| 15,2 | 22,4 | 0,6 | 5 | 1 | 19 | 2012 |
| 12,1 | 11,3 | 0,6 | 2 | 1 | 23 | 2007 |
| 14,9 | 21,1 | 0,6 | 3 | 1 | 24 | 2002 |
| 14,9 | 21,1 | 0,6 | 3 | 1 | 18 | 2007 |
| 15,4 | 23,3 | 0,6 | 4 | 1 | 24 | 2002 |
| 15,4 | 23,3 | 0,6 | 4 | 1 | 22 | 2004 |

|      |      |     |   |   |    |      |
|------|------|-----|---|---|----|------|
| 15,4 | 23,3 | 0,6 | 5 | 1 | 21 | 2006 |
| 15,4 | 23,3 | 0,6 | 3 | 1 | 23 | 2007 |
| 17,1 | 31,9 | 0,6 | 6 | 1 | 21 | 2013 |
| 17,1 | 31,9 | 0,6 | 4 | 1 | 18 | 2015 |
| 18,5 | 40,4 | 0,6 | 4 | 1 | 15 | 2015 |
| 13,5 | 15,7 | 0,6 | 3 | 1 | 23 | 2001 |
| 13,5 | 15,7 | 0,6 | 3 | 1 | 18 | 2007 |
| 13,5 | 15,7 | 0,6 | 3 | 1 | 20 | 2009 |
| 13,5 | 15,7 | 0,6 | 2 | 1 | 21 | 2012 |
| 17,5 | 34,2 | 0,6 | 8 | 1 | 20 | 2013 |
| 17,5 | 34,2 | 0,6 | 7 | 1 | 18 | 2014 |
| 12,9 | 13,7 | 0,6 | 2 | 1 | 22 | 2009 |
| 12,9 | 13,7 | 0,6 | 2 | 1 | 22 | 2013 |
| 12,9 | 13,7 | 0,6 | 3 | 1 | 18 | 2014 |
| 15,7 | 24,7 | 0,6 | 5 | 1 | 18 | 2000 |
| 15,7 | 24,7 | 0,6 | 4 | 1 | 18 | 2014 |
| 14,8 | 20,7 | 0,6 | 5 | 1 | 21 | 2012 |
| 14,8 | 20,7 | 0,6 | 3 | 1 | 19 | 2012 |
| 14,1 | 17,9 | 0,6 | 3 | 1 | 18 | 2008 |

|      |      |     |   |   |    |      |
|------|------|-----|---|---|----|------|
| 14,1 | 17,9 | 0,6 | 5 | 1 | 20 | 2012 |
| 14,1 | 17,9 | 0,6 | 4 | 1 | 23 | 2015 |
| 11   | 8,5  | 0,6 | 2 | 1 | 23 | 2004 |
| 18,6 | 41,1 | 0,6 | 4 | 1 | 19 | 2012 |
| 12,2 | 11,6 | 0,6 | 2 | 1 | 23 | 2007 |
| 15,8 | 25,2 | 0,6 | 4 | 1 | 20 | 2013 |
| 12,8 | 13,4 | 0,6 | 2 | 1 | 24 | 2006 |
| 12,8 | 13,4 | 0,6 | 2 | 1 | 26 | 2009 |
| 12,8 | 13,4 | 0,6 | 3 | 1 | 23 | 2010 |
| 12,8 | 13,4 | 0,6 | 3 | 1 | 23 | 2010 |
| 12,8 | 13,4 | 0,6 | 3 | 1 | 17 | 2014 |
| 15,1 | 22   | 0,6 | 3 | 1 | 26 | 2003 |
| 15,1 | 22   | 0,6 | 5 | 1 | 20 | 2009 |
| 15,1 | 22   | 0,6 | 5 | 1 | 19 | 2012 |
| 15,1 | 22   | 0,6 | 5 | 1 | 21 | 2012 |
| 15,1 | 22   | 0,6 | 4 | 1 | 19 | 2015 |
| 14,7 | 20,3 | 0,6 | 4 | 1 | 18 | 1999 |
| 14,7 | 20,3 | 0,6 | 3 | 1 | 19 | 2001 |
| 14,7 | 20,3 | 0,6 | 3 | 1 | 23 | 2003 |

|      |      |     |   |   |    |      |
|------|------|-----|---|---|----|------|
| 14,2 | 18,3 | 0,6 | 4 | 1 | 20 | 2009 |
| 14,2 | 18,3 | 0,6 | 3 | 1 | 21 | 2014 |
| 14,2 | 18,3 | 0,6 | 3 | 1 | 21 | 2015 |
| 13,2 | 14,7 | 0,6 | 2 | 1 | 21 | 2013 |
| 13,2 | 14,7 | 0,6 | 3 | 1 | 17 | 2014 |
| 13,8 | 16,8 | 0,6 | 2 | 1 | 27 | 1999 |
| 13,8 | 16,8 | 0,6 | 3 | 1 | 17 | 2008 |
| 13,8 | 16,8 | 0,6 | 3 | 1 | 22 | 2015 |
| 16,4 | 28,2 | 0,6 | 4 | 1 | 19 | 2012 |
| 15,9 | 25,7 | 0,6 | 5 | 1 | 21 | 1999 |
| 15,3 | 22,9 | 0,6 | 3 | 1 | 19 | 2012 |
| 15,3 | 22,9 | 0,6 | 4 | 1 | 19 | 2012 |
| 14,3 | 18,7 | 0,6 | 3 | 1 | 20 | 2009 |
| 14,3 | 18,7 | 0,6 | 7 | 1 | 21 | 2012 |
| 14,3 | 18,7 | 0,6 | 3 | 1 | 19 | 2013 |
| 14,3 | 18,7 | 0,6 | 4 | 1 | 15 | 2015 |
| 14,3 | 18,7 | 0,6 | 3 | 1 | 18 | 2015 |
| 12,7 | 13,1 | 0,6 | 2 | 1 | 21 | 2014 |
| 14,5 | 19,5 | 0,6 | 5 | 1 | 26 | 2000 |

|      |      |     |   |   |    |      |
|------|------|-----|---|---|----|------|
| 14,5 | 19,5 | 0,6 | 6 | 1 | 19 | 2008 |
| 14,5 | 19,5 | 0,6 | 5 | 1 | 21 | 2012 |
| 18,5 | 40,5 | 0,6 | 6 | 1 | 18 | 2015 |
| 16   | 26,2 | 0,6 | 5 | 1 | 24 | 2009 |
| 16   | 26,2 | 0,6 | 5 | 1 | 21 | 2013 |
| 14,4 | 19,1 | 0,6 | 4 | 1 | 25 | 1999 |
| 14,4 | 19,1 | 0,6 | 3 | 1 | 19 | 2002 |
| 14,4 | 19,1 | 0,6 | 3 | 1 | 19 | 2015 |
| 16,2 | 27,2 | 0,6 | 6 | 1 | 21 | 1999 |
| 16,2 | 27,2 | 0,6 | 7 | 1 | 17 | 2009 |
| 12,4 | 12,2 | 0,6 | 2 | 1 | 19 | 2002 |
| 12,6 | 12,8 | 0,6 | 2 | 1 | 19 | 2013 |
| 15   | 21,6 | 0,6 | 3 | 1 | 21 | 1999 |
| 12,5 | 12,5 | 0,6 | 2 | 1 | 19 | 2000 |
| 15   | 21,6 | 0,6 | 4 | 1 | 22 | 2001 |
| 15   | 21,6 | 0,6 | 7 | 1 | 22 | 2005 |
| 12,5 | 12,5 | 0,6 | 2 | 1 | 19 | 2006 |
| 15   | 21,6 | 0,6 | 6 | 1 | 23 | 2007 |
| 12,5 | 12,5 | 0,6 | 2 | 1 | 22 | 2009 |

|      |      |     |   |   |    |      |
|------|------|-----|---|---|----|------|
| 12,5 | 12,5 | 0,6 | 2 | 1 | 23 | 2010 |
| 12,5 | 12,5 | 0,6 | 2 | 1 | 23 | 2010 |
| 15   | 21,6 | 0,6 | 3 | 1 | 19 | 2012 |
| 15   | 21,6 | 0,6 | 3 | 1 | 19 | 2012 |
| 15   | 21,6 | 0,6 | 5 | 1 | 19 | 2012 |
| 12,5 | 12,5 | 0,6 | 2 | 1 | 18 | 2014 |
| 15   | 21,6 | 0,6 | 4 | 1 | 16 | 2015 |
| 13,4 | 15,4 | 0,6 | 3 | 1 | 24 | 2009 |
| 13,4 | 15,4 | 0,6 | 4 | 1 | 18 | 2015 |
| 15,6 | 24,3 | 0,6 | 3 | 1 | 19 | 2000 |
| 15,6 | 24,3 | 0,6 | 6 | 1 | 18 | 2012 |
| 17,8 | 36,1 | 0,6 | 6 | 1 | 20 | 2013 |
| 13,9 | 17,2 | 0,6 | 3 | 1 | 25 | 2002 |
| 13,9 | 17,2 | 0,6 | 3 | 1 | 20 | 2010 |
| 13,9 | 17,2 | 0,6 | 3 | 1 | 20 | 2010 |
| 13,9 | 17,2 | 0,6 | 4 | 1 | 21 | 2012 |
| 16,6 | 29,3 | 0,6 | 6 | 1 | 20 | 2001 |
| 13,1 | 14,4 | 0,6 | 2 | 1 | 23 | 2001 |
| 13,1 | 14,4 | 0,6 | 3 | 1 | 25 | 2007 |

|      |      |     |   |   |    |      |
|------|------|-----|---|---|----|------|
| 13,1 | 14,4 | 0,6 | 2 | 1 | 17 | 2009 |
| 13,1 | 14,4 | 0,6 | 3 | 1 | 22 | 2009 |
| 13,1 | 14,4 | 0,6 | 4 | 1 | 21 | 2011 |
| 13,1 | 14,4 | 0,6 | 2 | 1 | 17 | 2014 |
| 13,1 | 14,4 | 0,6 | 2 | 1 | 21 | 2014 |
| 13,1 | 14,4 | 0,6 | 2 | 1 | 21 | 2014 |
| 13,1 | 14,4 | 0,6 | 2 | 1 | 23 | 2014 |
| 11,2 | 9    | 0,6 | 1 | 1 | 24 | 2009 |
| 11,6 | 10   | 0,6 | 2 | 1 | 23 | 2005 |
| 15,2 | 22,5 | 0,6 | 4 | 1 | 26 | 2000 |
| 15,2 | 22,5 | 0,6 | 3 | 1 | 26 | 2001 |
| 15,2 | 22,5 | 0,6 | 3 | 1 | 20 | 2006 |
| 15,2 | 22,5 | 0,6 | 4 | 1 | 20 | 2011 |
| 15,2 | 22,5 | 0,6 | 3 | 1 | 19 | 2012 |
| 15,4 | 23,4 | 0,6 | 3 | 1 | 18 | 2001 |
| 15,4 | 23,4 | 0,6 | 7 | 1 | 23 | 2006 |
| 15,4 | 23,4 | 0,6 | 3 | 1 | 16 | 2008 |
| 15,4 | 23,4 | 0,6 | 4 | 1 | 21 | 2011 |
| 20,5 | 55,2 | 0,6 | 5 | 1 | 17 | 2014 |

|      |      |     |   |   |    |      |
|------|------|-----|---|---|----|------|
| 15,7 | 24,8 | 0,6 | 3 | 1 | 18 | 2015 |
| 14,9 | 21,2 | 0,6 | 4 | 1 | 21 | 2012 |
| 14   | 17,6 | 0,6 | 4 | 1 | 25 | 1999 |
| 14   | 17,6 | 0,6 | 2 | 1 | 21 | 2000 |
| 14   | 17,6 | 0,6 | 4 | 1 | 25 | 2004 |
| 14   | 17,6 | 0,6 | 7 | 1 | 20 | 2009 |
| 14   | 17,6 | 0,6 | 3 | 1 | 26 | 2009 |
| 15,8 | 25,3 | 0,6 | 3 | 1 | 18 | 2001 |
| 19,2 | 45,4 | 0,6 | 8 | 1 | 22 | 2013 |
| 16,4 | 28,3 | 0,6 | 5 | 1 | 18 | 1999 |
| 16,4 | 28,3 | 0,6 | 8 | 1 | 22 | 2003 |
| 17,4 | 33,8 | 0,6 | 5 | 1 | 18 | 2000 |
| 17,4 | 33,8 | 0,6 | 5 | 1 | 20 | 2000 |
| 14,8 | 20,8 | 0,6 | 3 | 1 | 21 | 2000 |
| 22,2 | 70,2 | 0,6 | 7 | 1 | 20 | 2013 |
| 13,7 | 16,5 | 0,6 | 3 | 1 | 21 | 2009 |
| 13   | 14,1 | 0,6 | 2 | 1 | 18 | 2000 |
| 13   | 14,1 | 0,6 | 2 | 1 | 21 | 2008 |
| 13   | 14,1 | 0,6 | 2 | 1 | 23 | 2010 |

|      |      |     |   |   |    |      |
|------|------|-----|---|---|----|------|
| 13   | 14,1 | 0,6 | 2 | 1 | 23 | 2010 |
| 13   | 14,1 | 0,6 | 2 | 1 | 22 | 2011 |
| 15,5 | 23,9 | 0,6 | 3 | 1 | 22 | 2001 |
| 15,5 | 23,9 | 0,6 | 5 | 1 | 19 | 2012 |
| 13,3 | 15,1 | 0,6 | 3 | 1 | 22 | 2002 |
| 13,3 | 15,1 | 0,6 | 3 | 1 | 21 | 2011 |
| 13,3 | 15,1 | 0,6 | 3 | 1 | 17 | 2014 |
| 17,5 | 34,4 | 0,6 | 4 | 1 | 19 | 2013 |
| 15,1 | 22,1 | 0,6 | 4 | 1 | 22 | 2007 |
| 16,3 | 27,8 | 0,6 | 6 | 1 | 19 | 2013 |
| 16,7 | 29,9 | 0,6 | 6 | 1 | 24 | 2001 |
| 16   | 26,3 | 0,6 | 3 | 1 | 18 | 2002 |
| 16   | 26,3 | 0,6 | 5 | 1 | 24 | 2002 |
| 16   | 26,3 | 0,6 | 6 | 1 | 19 | 2013 |
| 14,1 | 18   | 0,6 | 3 | 1 | 23 | 2003 |
| 14,1 | 18   | 0,6 | 3 | 1 | 20 | 2008 |
| 14,1 | 18   | 0,6 | 2 | 1 | 21 | 2014 |
| 14,1 | 18   | 0,6 | 2 | 1 | 23 | 2014 |
| 16,2 | 27,3 | 0,6 | 7 | 1 | 26 | 2003 |

|      |      |     |   |   |    |      |
|------|------|-----|---|---|----|------|
| 15,3 | 23   | 0,6 | 3 | 1 | 18 | 2000 |
| 15,3 | 23   | 0,6 | 3 | 1 | 25 | 2004 |
| 15,3 | 23   | 0,6 | 6 | 1 | 21 | 2008 |
| 15,3 | 23   | 0,6 | 4 | 1 | 19 | 2013 |
| 13,5 | 15,8 | 0,6 | 3 | 1 | 22 | 2000 |
| 13,5 | 15,8 | 0,6 | 2 | 1 | 25 | 2002 |
| 13,5 | 15,8 | 0,6 | 2 | 1 | 19 | 2013 |
| 14,7 | 20,4 | 0,6 | 5 | 1 | 22 | 2009 |
| 16,9 | 31   | 0,6 | 4 | 1 | 19 | 2012 |
| 12   | 11,1 | 0,6 | 2 | 1 | 20 | 2004 |
| 12   | 11,1 | 0,6 | 3 | 1 | 22 | 2005 |
| 12   | 11,1 | 0,6 | 2 | 1 | 22 | 2007 |
| 12   | 11,1 | 0,6 | 2 | 1 | 18 | 2014 |
| 14,2 | 18,4 | 0,6 | 3 | 1 | 25 | 2003 |
| 17,2 | 32,7 | 0,6 | 9 | 1 | 26 | 2003 |
| 17,2 | 32,7 | 0,6 | 6 | 1 | 19 | 2011 |
| 15,6 | 24,4 | 0,6 | 7 | 1 | 24 | 2006 |
| 18,3 | 39,4 | 0,6 | 7 | 1 | 19 | 2013 |
| 14,3 | 18,8 | 0,6 | 3 | 1 | 21 | 2000 |

|      |      |     |   |   |    |      |
|------|------|-----|---|---|----|------|
| 14,3 | 18,8 | 0,6 | 4 | 1 | 25 | 2004 |
| 14,3 | 18,8 | 0,6 | 3 | 1 | 18 | 2008 |
| 14,3 | 18,8 | 0,6 | 5 | 1 | 19 | 2012 |
| 14,5 | 19,6 | 0,6 | 5 | 1 | 19 | 1999 |
| 15   | 21,7 | 0,6 | 5 | 1 | 21 | 2006 |
| 15   | 21,7 | 0,6 | 4 | 1 | 22 | 2011 |
| 10,8 | 8,1  | 0,6 | 2 | 1 | 23 | 2004 |
| 10,8 | 8,1  | 0,6 | 2 | 1 | 25 | 2005 |
| 14,4 | 19,2 | 0,6 | 3 | 1 | 17 | 2012 |
| 14,4 | 19,2 | 0,6 | 3 | 1 | 21 | 2015 |
| 13,8 | 16,9 | 0,6 | 4 | 1 | 26 | 1999 |
| 13,8 | 16,9 | 0,6 | 3 | 1 | 18 | 2007 |
| 13,8 | 16,9 | 0,6 | 3 | 1 | 23 | 2010 |
| 13,8 | 16,9 | 0,6 | 3 | 1 | 23 | 2010 |
| 13,8 | 16,9 | 0,6 | 3 | 1 | 19 | 2011 |
| 13,8 | 16,9 | 0,6 | 3 | 1 | 21 | 2015 |
| 17   | 31,6 | 0,6 | 6 | 1 | 19 | 2013 |
| 17   | 31,6 | 0,6 | 4 | 1 | 16 | 2015 |
| 15,4 | 23,5 | 0,6 | 3 | 1 | 21 | 2003 |

|      |      |     |   |   |    |      |
|------|------|-----|---|---|----|------|
| 13,2 | 14,8 | 0,6 | 2 | 1 | 21 | 2006 |
| 13,2 | 14,8 | 0,6 | 4 | 1 | 26 | 2009 |
| 13,2 | 14,8 | 0,6 | 4 | 1 | 22 | 2011 |
| 13,2 | 14,8 | 0,6 | 2 | 1 | 23 | 2011 |
| 12,1 | 11,4 | 0,6 | 2 | 1 | 19 | 2014 |
| 15,2 | 22,6 | 0,6 | 4 | 1 | 20 | 2001 |
| 15,2 | 22,6 | 0,6 | 4 | 1 | 24 | 2002 |
| 15,2 | 22,6 | 0,6 | 5 | 1 | 23 | 2002 |
| 15,2 | 22,6 | 0,6 | 3 | 1 | 17 | 2008 |
| 15,2 | 22,6 | 0,6 | 6 | 1 | 22 | 2011 |
| 12,8 | 13,5 | 0,6 | 3 | 1 | 25 | 2005 |
| 12,8 | 13,5 | 0,6 | 3 | 1 | 21 | 2008 |
| 12,8 | 13,5 | 0,6 | 2 | 1 | 20 | 2009 |
| 16,4 | 28,4 | 0,6 | 6 | 1 | 23 | 2007 |
| 14,9 | 21,3 | 0,6 | 5 | 1 | 18 | 1999 |
| 14,9 | 21,3 | 0,6 | 4 | 1 | 18 | 2002 |
| 14,9 | 21,3 | 0,6 | 4 | 1 | 20 | 2012 |
| 15,8 | 25,4 | 0,6 | 4 | 1 | 20 | 2003 |
| 15,8 | 25,4 | 0,6 | 6 | 1 | 23 | 2003 |

|      |      |     |   |   |    |      |
|------|------|-----|---|---|----|------|
| 16,7 | 30   | 0,6 | 3 | 1 | 18 | 2014 |
| 13,9 | 17,3 | 0,6 | 3 | 1 | 21 | 2008 |
| 13,4 | 15,5 | 0,6 | 2 | 1 | 19 | 2000 |
| 16,3 | 27,9 | 0,6 | 6 | 1 | 18 | 2000 |
| 16,3 | 27,9 | 0,6 | 4 | 1 | 19 | 2000 |
| 16,3 | 27,9 | 0,6 | 6 | 1 | 20 | 2011 |
| 12,2 | 11,7 | 0,6 | 2 | 1 | 20 | 2008 |
| 12,2 | 11,7 | 0,6 | 2 | 1 | 19 | 2014 |
| 15,9 | 25,9 | 0,6 | 4 | 1 | 23 | 2005 |
| 12,7 | 13,2 | 0,6 | 3 | 1 | 22 | 2005 |
| 12,7 | 13,2 | 0,6 | 2 | 1 | 23 | 2009 |
| 16,2 | 27,4 | 0,6 | 4 | 1 | 16 | 2015 |
| 15,5 | 24   | 0,6 | 4 | 1 | 23 | 2011 |
| 16   | 26,4 | 0,6 | 5 | 1 | 19 | 2000 |
| 16   | 26,4 | 0,6 | 4 | 1 | 20 | 2001 |
| 16   | 26,4 | 0,6 | 3 | 1 | 19 | 2012 |
| 11,3 | 9,3  | 0,6 | 1 | 1 | 26 | 2001 |
| 16,1 | 26,9 | 0,6 | 5 | 1 | 18 | 2000 |
| 16,1 | 26,9 | 0,6 | 5 | 1 | 19 | 2012 |

|      |      |     |   |   |    |      |
|------|------|-----|---|---|----|------|
| 14,8 | 20,9 | 0,6 | 3 | 1 | 17 | 2002 |
| 14,8 | 20,9 | 0,6 | 6 | 1 | 23 | 2007 |
| 14,8 | 20,9 | 0,6 | 4 | 1 | 19 | 2012 |
| 15,1 | 22,2 | 0,6 | 5 | 1 | 24 | 2001 |
| 12,3 | 12   | 0,6 | 2 | 1 | 22 | 2005 |
| 12,3 | 12   | 0,6 | 2 | 1 | 19 | 2011 |
| 12,3 | 12   | 0,6 | 2 | 1 | 19 | 2013 |
| 12,6 | 12,9 | 0,6 | 2 | 1 | 21 | 2008 |
| 16,6 | 29,5 | 0,6 | 4 | 1 | 20 | 2013 |
| 15,3 | 23,1 | 0,6 | 5 | 1 | 20 | 2003 |
| 13,1 | 14,5 | 0,6 | 3 | 1 | 26 | 2003 |
| 20   | 51,6 | 0,6 | 6 | 1 | 18 | 2015 |
| 14   | 17,7 | 0,6 | 5 | 1 | 22 | 1999 |
| 14   | 17,7 | 0,6 | 2 | 1 | 22 | 2000 |
| 14   | 17,7 | 0,6 | 2 | 1 | 26 | 2000 |
| 14   | 17,7 | 0,6 | 2 | 1 | 26 | 2003 |
| 14   | 17,7 | 0,6 | 4 | 1 | 25 | 2008 |
| 14   | 17,7 | 0,6 | 4 | 1 | 20 | 2011 |
| 12,4 | 12,3 | 0,6 | 2 | 1 | 22 | 2011 |

|      |      |     |   |   |    |      |
|------|------|-----|---|---|----|------|
| 12,4 | 12,3 | 0,6 | 2 | 1 | 20 | 2013 |
| 12,4 | 12,3 | 0,6 | 2 | 1 | 17 | 2014 |
| 12,5 | 12,6 | 0,6 | 2 | 1 | 22 | 2001 |
| 12,5 | 12,6 | 0,6 | 2 | 1 | 20 | 2002 |
| 11,8 | 10,6 | 0,6 | 2 | 1 | 23 | 2005 |
| 14,7 | 20,5 | 0,6 | 5 | 1 | 20 | 1999 |
| 14,7 | 20,5 | 0,6 | 4 | 1 | 24 | 2009 |
| 14,7 | 20,5 | 0,6 | 7 | 1 | 19 | 2012 |
| 20,2 | 53,2 | 0,6 | 6 | 1 | 17 | 2014 |
| 16,5 | 29   | 0,6 | 6 | 1 | 18 | 2002 |
| 13,7 | 16,6 | 0,6 | 3 | 1 | 25 | 1999 |
| 13,7 | 16,6 | 0,6 | 2 | 1 | 24 | 2002 |
| 13,7 | 16,6 | 0,6 | 4 | 1 | 24 | 2009 |
| 13,7 | 16,6 | 0,6 | 4 | 1 | 22 | 2011 |
| 17,6 | 35,2 | 0,6 | 4 | 1 | 15 | 2015 |
| 14,1 | 18,1 | 0,6 | 3 | 1 | 20 | 2006 |
| 14,1 | 18,1 | 0,6 | 5 | 1 | 25 | 2007 |
| 14,1 | 18,1 | 0,6 | 6 | 1 | 17 | 2008 |
| 14,1 | 18,1 | 0,6 | 3 | 1 | 20 | 2008 |

|      |      |     |   |   |    |      |
|------|------|-----|---|---|----|------|
| 14,1 | 18,1 | 0,6 | 4 | 1 | 22 | 2009 |
| 14,6 | 20,1 | 0,6 | 5 | 1 | 18 | 2000 |
| 14,6 | 20,1 | 0,6 | 7 | 1 | 22 | 2007 |
| 15   | 21,8 | 0,6 | 3 | 1 | 24 | 2001 |
| 15   | 21,8 | 0,6 | 4 | 1 | 22 | 2004 |
| 15   | 21,8 | 0,6 | 3 | 1 | 18 | 2015 |
| 13,3 | 15,2 | 0,6 | 3 | 1 | 23 | 2003 |
| 13,3 | 15,2 | 0,6 | 4 | 1 | 25 | 2004 |
| 14,2 | 18,5 | 0,6 | 5 | 1 | 23 | 1999 |
| 14,2 | 18,5 | 0,6 | 5 | 1 | 26 | 1999 |
| 14,2 | 18,5 | 0,6 | 5 | 1 | 20 | 2007 |
| 16,4 | 28,5 | 0,6 | 6 | 1 | 22 | 2003 |
| 14,5 | 19,7 | 0,6 | 3 | 1 | 22 | 2001 |
| 14,5 | 19,7 | 0,6 | 4 | 1 | 20 | 2006 |
| 14,5 | 19,7 | 0,6 | 6 | 1 | 20 | 2013 |
| 13,5 | 15,9 | 0,6 | 2 | 1 | 20 | 2002 |
| 20,9 | 59   | 0,6 | 8 | 1 | 21 | 2013 |
| 16,7 | 30,1 | 0,6 | 4 | 1 | 18 | 2000 |
| 16,7 | 30,1 | 0,6 | 6 | 1 | 19 | 2000 |

|      |      |     |   |   |    |      |
|------|------|-----|---|---|----|------|
| 16,7 | 30,1 | 0,6 | 5 | 1 | 21 | 2001 |
| 14,3 | 18,9 | 0,6 | 5 | 1 | 22 | 1999 |
| 14,3 | 18,9 | 0,6 | 5 | 1 | 19 | 2000 |
| 13   | 14,2 | 0,6 | 5 | 1 | 26 | 1999 |
| 13   | 14,2 | 0,6 | 2 | 1 | 26 | 2001 |
| 13   | 14,2 | 0,6 | 2 | 1 | 26 | 2003 |
| 13   | 14,2 | 0,6 | 3 | 1 | 23 | 2005 |
| 13   | 14,2 | 0,6 | 2 | 1 | 20 | 2009 |
| 13   | 14,2 | 0,6 | 2 | 1 | 18 | 2014 |
| 13   | 14,2 | 0,6 | 2 | 1 | 19 | 2014 |
| 13   | 14,2 | 0,6 | 2 | 1 | 23 | 2015 |
| 14,4 | 19,3 | 0,6 | 3 | 1 | 22 | 2002 |
| 14,4 | 19,3 | 0,6 | 2 | 1 | 25 | 2003 |
| 14,4 | 19,3 | 0,6 | 3 | 1 | 26 | 2003 |
| 14,4 | 19,3 | 0,6 | 3 | 1 | 15 | 2015 |
| 15,2 | 22,7 | 0,6 | 4 | 1 | 21 | 1999 |
| 15,2 | 22,7 | 0,6 | 5 | 1 | 21 | 2006 |
| 15,2 | 22,7 | 0,6 | 6 | 1 | 23 | 2008 |
| 18   | 37,7 | 0,6 | 6 | 1 | 20 | 2013 |

|      |      |     |    |   |    |      |
|------|------|-----|----|---|----|------|
| 19,4 | 47,2 | 0,6 | 6  | 1 | 20 | 2013 |
| 15,8 | 25,5 | 0,6 | 3  | 1 | 26 | 2003 |
| 15,8 | 25,5 | 0,6 | 6  | 1 | 22 | 2007 |
| 15,8 | 25,5 | 0,6 | 5  | 1 | 19 | 2012 |
| 15,8 | 25,5 | 0,6 | 3  | 1 | 18 | 2015 |
| 17,2 | 32,9 | 0,6 | 10 | 1 | 17 | 2008 |
| 15,9 | 26   | 0,6 | 4  | 1 | 17 | 2012 |
| 13,8 | 17   | 0,6 | 3  | 1 | 21 | 2000 |
| 13,8 | 17   | 0,6 | 2  | 1 | 21 | 2006 |
| 13,8 | 17   | 0,6 | 3  | 1 | 21 | 2009 |
| 13,8 | 17   | 0,6 | 4  | 1 | 19 | 2012 |
| 14,9 | 21,4 | 0,6 | 10 | 1 | 25 | 2007 |
| 16   | 26,5 | 0,6 | 6  | 1 | 26 | 2001 |
| 16   | 26,5 | 0,6 | 5  | 1 | 18 | 2015 |
| 11,6 | 10,1 | 0,6 | 2  | 1 | 22 | 2007 |
| 16,6 | 29,6 | 0,6 | 5  | 1 | 18 | 2001 |
| 16,6 | 29,6 | 0,6 | 5  | 1 | 19 | 2012 |
| 15,5 | 24,1 | 0,6 | 6  | 1 | 21 | 1999 |
| 15,5 | 24,1 | 0,6 | 5  | 1 | 22 | 1999 |

|      |      |     |   |   |    |      |
|------|------|-----|---|---|----|------|
| 15,5 | 24,1 | 0,6 | 5 | 1 | 26 | 2000 |
| 15,5 | 24,1 | 0,6 | 3 | 1 | 18 | 2001 |
| 15,5 | 24,1 | 0,6 | 3 | 1 | 26 | 2001 |
| 15,5 | 24,1 | 0,6 | 5 | 1 | 19 | 2006 |
| 17,8 | 36,5 | 0,6 | 4 | 1 | 19 | 2013 |
| 17,7 | 35,9 | 0,6 | 4 | 1 | 18 | 2012 |
| 17,7 | 35,9 | 0,6 | 6 | 1 | 22 | 2013 |
| 16,8 | 30,7 | 0,6 | 4 | 1 | 22 | 2013 |
| 16,8 | 30,7 | 0,6 | 4 | 1 | 20 | 2013 |
| 12,9 | 13,9 | 0,6 | 2 | 1 | 19 | 2014 |
| 18,1 | 38,4 | 0,6 | 9 | 1 | 23 | 2001 |
| 15,1 | 22,3 | 0,6 | 3 | 1 | 19 | 2012 |
| 15,1 | 22,3 | 0,6 | 3 | 1 | 19 | 2013 |
| 15,3 | 23,2 | 0,6 | 4 | 1 | 22 | 2001 |
| 15,3 | 23,2 | 0,6 | 5 | 1 | 26 | 2001 |
| 16,5 | 29,1 | 0,6 | 7 | 1 | 21 | 2012 |
| 16,5 | 29,1 | 0,6 | 5 | 1 | 21 | 2013 |
| 13,2 | 14,9 | 0,6 | 3 | 1 | 18 | 2007 |
| 13,2 | 14,9 | 0,6 | 3 | 1 | 23 | 2008 |

|      |      |     |   |   |    |      |
|------|------|-----|---|---|----|------|
| 10,5 | 7,5  | 0,6 | 2 | 1 | 20 | 2004 |
| 13,9 | 17,4 | 0,6 | 3 | 1 | 25 | 2007 |
| 13,9 | 17,4 | 0,6 | 2 | 1 | 21 | 2013 |
| 11,4 | 9,6  | 0,6 | 2 | 1 | 23 | 2004 |
| 15,6 | 24,6 | 0,6 | 5 | 1 | 19 | 2000 |
| 13,6 | 16,3 | 0,6 | 2 | 1 | 23 | 1999 |
| 13,6 | 16,3 | 0,6 | 3 | 1 | 20 | 2006 |
| 13,6 | 16,3 | 0,6 | 3 | 1 | 19 | 2012 |
| 12   | 11,2 | 0,6 | 2 | 1 | 22 | 1999 |
| 12   | 11,2 | 0,6 | 2 | 1 | 24 | 2009 |
| 13,4 | 15,6 | 0,6 | 4 | 1 | 26 | 1999 |
| 13,4 | 15,6 | 0,6 | 2 | 1 | 24 | 2009 |
| 16,7 | 30,2 | 0,6 | 4 | 1 | 20 | 2013 |
| 12,8 | 13,6 | 0,6 | 2 | 1 | 20 | 2013 |
| 14,7 | 20,6 | 0,6 | 5 | 1 | 21 | 2000 |
| 14,7 | 20,6 | 0,6 | 3 | 1 | 24 | 2001 |
| 14,7 | 20,6 | 0,6 | 3 | 1 | 24 | 2001 |
| 14,7 | 20,6 | 0,6 | 6 | 1 | 20 | 2013 |
| 14,7 | 20,6 | 0,6 | 3 | 1 | 18 | 2014 |

|      |      |     |   |   |    |      |
|------|------|-----|---|---|----|------|
| 14   | 17,8 | 0,6 | 5 | 1 | 26 | 1999 |
| 14   | 17,8 | 0,6 | 4 | 1 | 23 | 2005 |
| 14   | 17,8 | 0,6 | 3 | 1 | 25 | 2007 |
| 14   | 17,8 | 0,6 | 3 | 1 | 22 | 2011 |
| 14   | 17,8 | 0,6 | 2 | 1 | 19 | 2014 |
| 16,3 | 28,1 | 0,6 | 5 | 1 | 19 | 2010 |
| 16,3 | 28,1 | 0,6 | 5 | 1 | 19 | 2010 |
| 15   | 21,9 | 0,6 | 6 | 1 | 25 | 2004 |
| 15   | 21,9 | 0,6 | 4 | 1 | 21 | 2005 |
| 15,4 | 23,7 | 0,6 | 3 | 1 | 20 | 2003 |
| 15,4 | 23,7 | 0,6 | 4 | 1 | 22 | 2011 |
| 15,4 | 23,7 | 0,6 | 4 | 1 | 19 | 2012 |
| 17,3 | 33,6 | 0,6 | 6 | 1 | 23 | 2002 |
| 20,1 | 52,7 | 0,6 | 4 | 1 | 19 | 2013 |
| 15,8 | 25,6 | 0,6 | 3 | 1 | 18 | 2001 |
| 15,8 | 25,6 | 0,6 | 5 | 1 | 23 | 2005 |
| 15,8 | 25,6 | 0,6 | 6 | 1 | 22 | 2011 |
| 14,6 | 20,2 | 0,6 | 4 | 1 | 21 | 2001 |
| 14,6 | 20,2 | 0,6 | 4 | 1 | 19 | 2012 |

|      |      |     |    |   |    |      |
|------|------|-----|----|---|----|------|
| 16,2 | 27,6 | 0,6 | 5  | 1 | 19 | 1999 |
| 16,2 | 27,6 | 0,6 | 4  | 1 | 26 | 1999 |
| 15,2 | 22,8 | 0,6 | 5  | 1 | 19 | 1999 |
| 15,2 | 22,8 | 0,6 | 3  | 1 | 21 | 2001 |
| 15,2 | 22,8 | 0,6 | 3  | 1 | 22 | 2003 |
| 14,1 | 18,2 | 0,6 | 4  | 1 | 25 | 2004 |
| 14,1 | 18,2 | 0,6 | 5  | 1 | 25 | 2007 |
| 14,1 | 18,2 | 0,6 | 3  | 1 | 16 | 2008 |
| 14,1 | 18,2 | 0,6 | 3  | 1 | 19 | 2012 |
| 14,1 | 18,2 | 0,6 | 3  | 1 | 21 | 2015 |
| 17   | 31,9 | 0,6 | 10 | 1 | 19 | 2012 |
| 17   | 31,9 | 0,6 | 4  | 1 | 19 | 2013 |
| 11,7 | 10,4 | 0,6 | 2  | 1 | 23 | 2007 |
| 16   | 26,6 | 0,6 | 4  | 1 | 20 | 1999 |
| 16   | 26,6 | 0,6 | 6  | 1 | 22 | 1999 |
| 16   | 26,6 | 0,6 | 6  | 1 | 26 | 2005 |
| 16   | 26,6 | 0,6 | 6  | 1 | 21 | 2013 |
| 13,1 | 14,6 | 0,6 | 2  | 1 | 25 | 1999 |
| 13,1 | 14,6 | 0,6 | 2  | 1 | 25 | 2003 |

|      |      |     |   |   |    |      |
|------|------|-----|---|---|----|------|
| 13,1 | 14,6 | 0,6 | 2 | 1 | 21 | 2008 |
| 13,1 | 14,6 | 0,6 | 2 | 1 | 22 | 2011 |
| 19,6 | 48,9 | 0,6 | 8 | 1 | 22 | 2013 |
| 13,7 | 16,7 | 0,6 | 3 | 1 | 26 | 1999 |
| 13,7 | 16,7 | 0,6 | 2 | 1 | 21 | 2011 |
| 13,7 | 16,7 | 0,6 | 3 | 1 | 18 | 2015 |
| 14,5 | 19,8 | 0,6 | 3 | 1 | 22 | 2001 |
| 14,5 | 19,8 | 0,6 | 4 | 1 | 21 | 2009 |
| 14,5 | 19,8 | 0,6 | 2 | 1 | 19 | 2013 |
| 16,8 | 30,8 | 0,6 | 4 | 1 | 23 | 2003 |
| 14,2 | 18,6 | 0,6 | 3 | 1 | 21 | 2000 |
| 14,2 | 18,6 | 0,6 | 4 | 1 | 25 | 2004 |
| 14,2 | 18,6 | 0,6 | 3 | 1 | 21 | 2005 |
| 14,2 | 18,6 | 0,6 | 3 | 1 | 17 | 2008 |
| 14,4 | 19,4 | 0,6 | 5 | 1 | 27 | 1999 |
| 14,4 | 19,4 | 0,6 | 3 | 1 | 26 | 2000 |
| 14,4 | 19,4 | 0,6 | 3 | 1 | 21 | 2005 |
| 14,4 | 19,4 | 0,6 | 5 | 1 | 23 | 2009 |
| 14,4 | 19,4 | 0,6 | 3 | 1 | 21 | 2012 |

|      |      |     |   |   |    |      |
|------|------|-----|---|---|----|------|
| 14,3 | 19   | 0,6 | 4 | 1 | 21 | 2009 |
| 14,3 | 19   | 0,6 | 3 | 1 | 18 | 2015 |
| 12,2 | 11,8 | 0,6 | 2 | 1 | 18 | 2000 |
| 12,2 | 11,8 | 0,6 | 3 | 1 | 23 | 2005 |
| 12,2 | 11,8 | 0,6 | 2 | 1 | 20 | 2007 |
| 12,2 | 11,8 | 0,6 | 2 | 1 | 25 | 2007 |
| 12,2 | 11,8 | 0,6 | 2 | 1 | 20 | 2012 |
| 12,2 | 11,8 | 0,6 | 2 | 1 | 20 | 2013 |
| 15,5 | 24,2 | 0,6 | 5 | 1 | 21 | 1999 |
| 15,5 | 24,2 | 0,6 | 5 | 1 | 25 | 2002 |
| 12,6 | 13   | 0,6 | 2 | 1 | 23 | 2007 |
| 16,5 | 29,2 | 0,7 | 4 | 1 | 24 | 2001 |
| 20,8 | 58,5 | 0,7 | 5 | 1 | 16 | 2015 |
| 12,3 | 12,1 | 0,7 | 2 | 1 | 20 | 2002 |
| 12,3 | 12,1 | 0,7 | 2 | 1 | 19 | 2013 |
| 12,3 | 12,1 | 0,7 | 2 | 1 | 18 | 2014 |
| 12,5 | 12,7 | 0,7 | 2 | 1 | 21 | 2006 |
| 12,5 | 12,7 | 0,7 | 3 | 1 | 23 | 2010 |
| 12,5 | 12,7 | 0,7 | 3 | 1 | 23 | 2010 |

|      |      |     |   |   |    |      |
|------|------|-----|---|---|----|------|
| 12,5 | 12,7 | 0,7 | 2 | 1 | 20 | 2013 |
| 13,5 | 16   | 0,7 | 2 | 1 | 22 | 2009 |
| 13,3 | 15,3 | 0,7 | 2 | 1 | 19 | 2000 |
| 13,3 | 15,3 | 0,7 | 3 | 1 | 16 | 2015 |
| 12,4 | 12,4 | 0,7 | 2 | 1 | 22 | 2002 |
| 12,4 | 12,4 | 0,7 | 2 | 1 | 19 | 2013 |
| 15,3 | 23,3 | 0,7 | 3 | 1 | 16 | 2015 |
| 15,3 | 23,3 | 0,7 | 3 | 1 | 21 | 2015 |
| 16,7 | 30,3 | 0,7 | 6 | 1 | 20 | 2013 |
| 15,1 | 22,4 | 0,7 | 4 | 1 | 26 | 2001 |
| 15,1 | 22,4 | 0,7 | 3 | 1 | 19 | 2010 |
| 15,1 | 22,4 | 0,7 | 3 | 1 | 19 | 2010 |
| 15,6 | 24,7 | 0,7 |   | 1 | 20 | 2011 |
| 13,8 | 17,1 | 0,7 | 3 | 1 | 25 | 2007 |
| 13   | 14,3 | 0,7 | 3 | 1 | 23 | 2005 |
| 13   | 14,3 | 0,7 | 4 | 1 | 21 | 2006 |
| 13   | 14,3 | 0,7 | 2 | 1 | 26 | 2009 |
| 13   | 14,3 | 0,7 | 2 | 1 | 23 | 2010 |
| 13   | 14,3 | 0,7 | 2 | 1 | 23 | 2010 |

|      |      |     |   |   |    |      |
|------|------|-----|---|---|----|------|
| 13   | 14,3 | 0,7 | 2 | 1 | 19 | 2013 |
| 13   | 14,3 | 0,7 | 2 | 1 | 18 | 2014 |
| 11,5 | 9,9  | 0,7 | 2 | 1 | 20 | 2004 |
| 11,5 | 9,9  | 0,7 | 2 | 1 | 26 | 2006 |
| 17,6 | 35,5 | 0,7 | 4 | 1 | 19 | 2012 |
| 15,7 | 25,2 | 0,7 | 5 | 1 | 19 | 1999 |
| 15,7 | 25,2 | 0,7 | 5 | 1 | 19 | 2000 |
| 17,5 | 34,9 | 0,7 | 6 | 1 | 22 | 2013 |
| 17   | 32   | 0,7 | 5 | 1 | 19 | 2012 |
| 18,7 | 42,6 | 0,7 | 6 | 1 | 20 | 2013 |
| 11,3 | 9,4  | 0,7 | 2 | 1 | 22 | 2004 |
| 11,3 | 9,4  | 0,7 | 2 | 1 | 25 | 2004 |
| 16,2 | 27,7 | 0,7 | 5 | 1 | 25 | 2004 |
| 15,8 | 25,7 | 0,7 | 3 | 1 | 17 | 2012 |
| 20,9 | 59,5 | 0,7 | 6 | 1 | 17 | 2012 |
| 16,1 | 27,2 | 0,7 | 5 | 1 | 19 | 2000 |
| 15   | 22   | 0,7 | 5 | 1 | 20 | 2004 |
| 15   | 22   | 0,7 | 3 | 1 | 17 | 2008 |
| 16   | 26,7 | 0,7 | 6 | 1 | 22 | 2000 |

|      |      |     |   |   |    |      |
|------|------|-----|---|---|----|------|
| 13,6 | 16,4 | 0,7 | 2 | 1 | 26 | 2001 |
| 13,6 | 16,4 | 0,7 | 4 | 1 | 25 | 2005 |
| 13,6 | 16,4 | 0,7 | 2 | 1 | 19 | 2010 |
| 13,6 | 16,4 | 0,7 | 2 | 1 | 19 | 2010 |
| 13,6 | 16,4 | 0,7 | 3 | 1 | 22 | 2015 |
| 15,2 | 22,9 | 0,7 | 5 | 1 | 20 | 2012 |
| 13,2 | 15   | 0,7 | 3 | 1 | 25 | 2007 |
| 13,2 | 15   | 0,7 | 3 | 1 | 19 | 2008 |
| 13,2 | 15   | 0,7 | 3 | 1 | 18 | 2014 |
| 16,5 | 29,3 | 0,7 | 6 | 1 | 20 | 2013 |
| 14,6 | 20,3 | 0,7 | 5 | 1 | 18 | 1999 |
| 14,6 | 20,3 | 0,7 | 5 | 1 | 22 | 1999 |
| 14,6 | 20,3 | 0,7 | 6 | 1 | 22 | 2002 |
| 14,6 | 20,3 | 0,7 | 4 | 1 | 26 | 2006 |
| 14   | 17,9 | 0,7 | 3 | 1 | 26 | 1999 |
| 14   | 17,9 | 0,7 | 5 | 1 | 20 | 2000 |
| 14   | 17,9 | 0,7 | 3 | 1 | 21 | 2003 |
| 14   | 17,9 | 0,7 | 4 | 1 | 25 | 2004 |
| 14   | 17,9 | 0,7 | 2 | 1 | 17 | 2014 |

|      |      |     |   |   |    |      |
|------|------|-----|---|---|----|------|
| 13,4 | 15,7 | 0,7 | 4 | 1 | 22 | 1999 |
| 13,4 | 15,7 | 0,7 | 6 | 1 | 21 | 2008 |
| 13,4 | 15,7 | 0,7 | 4 | 1 | 25 | 2008 |
| 13,4 | 15,7 | 0,7 | 5 | 1 | 19 | 2012 |
| 13,4 | 15,7 | 0,7 | 2 | 1 | 19 | 2013 |
| 15,5 | 24,3 | 0,7 | 5 | 1 | 23 | 1999 |
| 15,5 | 24,3 | 0,7 | 4 | 1 | 22 | 2004 |
| 15,5 | 24,3 | 0,7 | 4 | 1 | 22 | 2011 |
| 16,9 | 31,5 | 0,7 | 5 | 1 | 19 | 2012 |
| 16,7 | 30,4 | 0,7 | 6 | 1 | 20 | 2013 |
| 14,5 | 19,9 | 0,7 | 5 | 1 | 22 | 1999 |
| 11,9 | 11   | 0,7 | 2 | 1 | 19 | 2006 |
| 17,7 | 36,2 | 0,7 | 5 | 1 | 18 | 2014 |
| 14,1 | 18,3 | 0,7 | 4 | 1 | 25 | 1999 |
| 14,1 | 18,3 | 0,7 | 3 | 1 | 21 | 2008 |
| 14,1 | 18,3 | 0,7 | 3 | 1 | 19 | 2014 |
| 14,1 | 18,3 | 0,7 | 3 | 1 | 15 | 2015 |
| 16,4 | 28,8 | 0,7 | 4 | 1 | 18 | 2015 |
| 14,9 | 21,6 | 0,7 | 4 | 1 | 25 | 2003 |

|      |      |     |   |   |    |      |
|------|------|-----|---|---|----|------|
| 14,9 | 21,6 | 0,7 | 3 | 1 | 19 | 2008 |
| 14,4 | 19,5 | 0,7 | 2 | 1 | 24 | 2002 |
| 14,4 | 19,5 | 0,7 | 3 | 1 | 24 | 2002 |
| 14,2 | 18,7 | 0,7 | 3 | 1 | 21 | 1999 |
| 14,2 | 18,7 | 0,7 | 4 | 1 | 21 | 2006 |
| 14,2 | 18,7 | 0,7 | 4 | 1 | 20 | 2007 |
| 14,2 | 18,7 | 0,7 | 4 | 1 | 23 | 2008 |
| 14,2 | 18,7 | 0,7 | 3 | 1 | 25 | 2008 |
| 14,3 | 19,1 | 0,7 | 5 | 1 | 27 | 1999 |
| 14,3 | 19,1 | 0,7 | 2 | 1 | 21 | 2000 |
| 14,3 | 19,1 | 0,7 | 3 | 1 | 19 | 2002 |
| 14,3 | 19,1 | 0,7 | 4 | 1 | 20 | 2011 |
| 15,6 | 24,8 | 0,7 | 4 | 1 | 24 | 2001 |
| 15,6 | 24,8 | 0,7 | 4 | 1 | 22 | 2003 |
| 12,8 | 13,7 | 0,7 | 3 | 1 | 25 | 2007 |
| 12,8 | 13,7 | 0,7 | 2 | 1 | 22 | 2011 |
| 15,3 | 23,4 | 0,7 | 4 | 1 | 19 | 2001 |
| 15,3 | 23,4 | 0,7 | 5 | 1 | 20 | 2013 |
| 17   | 32,1 | 0,7 | 5 | 1 | 21 | 2013 |

|      |      |     |   |   |    |      |
|------|------|-----|---|---|----|------|
| 17   | 32,1 | 0,7 | 6 | 1 | 22 | 2013 |
| 16,3 | 28,3 | 0,7 | 5 | 1 | 19 | 2000 |
| 16,3 | 28,3 | 0,7 | 7 | 1 | 25 | 2004 |
| 15,1 | 22,5 | 0,7 | 5 | 1 | 20 | 1999 |
| 15,1 | 22,5 | 0,7 | 3 | 1 | 21 | 2001 |
| 15,1 | 22,5 | 0,7 | 3 | 1 | 23 | 2008 |
| 11   | 8,7  | 0,7 | 2 | 1 | 20 | 2004 |
| 11   | 8,7  | 0,7 | 2 | 1 | 23 | 2004 |
| 16,6 | 29,9 | 0,7 | 4 | 1 | 20 | 2004 |
| 16,8 | 31   | 0,7 | 4 | 1 | 18 | 2002 |
| 16,2 | 27,8 | 0,7 | 4 | 1 | 19 | 2001 |
| 16,2 | 27,8 | 0,7 | 6 | 1 | 18 | 2007 |
| 13,1 | 14,7 | 0,7 | 2 | 1 | 19 | 2002 |
| 13,1 | 14,7 | 0,7 | 2 | 1 | 23 | 2008 |
| 13,1 | 14,7 | 0,7 | 9 | 1 | 20 | 2011 |
| 12   | 11,3 | 0,7 | 2 | 1 | 21 | 2006 |
| 12   | 11,3 | 0,7 | 2 | 1 | 23 | 2007 |
| 12   | 11,3 | 0,7 | 2 | 1 | 26 | 2009 |
| 17,1 | 32,7 | 0,7 | 4 | 1 | 18 | 2012 |

|      |      |     |   |   |    |      |
|------|------|-----|---|---|----|------|
| 16,1 | 27,3 | 0,7 | 4 | 1 | 19 | 2012 |
| 12,7 | 13,4 | 0,7 | 2 | 1 | 22 | 2009 |
| 15,9 | 26,3 | 0,7 | 6 | 1 | 21 | 2013 |
| 16   | 26,8 | 0,7 | 6 | 1 | 24 | 2006 |
| 13,5 | 16,1 | 0,7 | 3 | 1 | 22 | 2011 |
| 13,5 | 16,1 | 0,7 | 3 | 1 | 23 | 2015 |
| 15,4 | 23,9 | 0,7 | 4 | 1 | 16 | 2015 |
| 13,8 | 17,2 | 0,7 | 3 | 1 | 25 | 2008 |
| 13,3 | 15,4 | 0,7 | 2 | 1 | 22 | 1999 |
| 13,3 | 15,4 | 0,7 | 4 | 1 | 23 | 2004 |
| 13,3 | 15,4 | 0,7 | 2 | 1 | 21 | 2012 |
| 12,1 | 11,6 | 0,7 | 3 | 1 | 22 | 2005 |
| 12,1 | 11,6 | 0,7 | 2 | 1 | 22 | 2007 |
| 12,1 | 11,6 | 0,7 | 2 | 1 | 25 | 2007 |
| 12,1 | 11,6 | 0,7 | 2 | 1 | 18 | 2014 |
| 14,7 | 20,8 | 0,7 | 5 | 1 | 25 | 1999 |
| 15   | 22,1 | 0,7 | 6 | 1 | 21 | 2006 |
| 15   | 22,1 | 0,7 | 4 | 1 | 23 | 2011 |
| 15   | 22,1 | 0,7 | 3 | 1 | 19 | 2013 |

|      |      |     |   |   |    |      |
|------|------|-----|---|---|----|------|
| 11,2 | 9,2  | 0,7 | 2 | 1 | 23 | 2004 |
| 10,6 | 7,8  | 0,7 | 1 | 1 | 25 | 2008 |
| 18   | 38,2 | 0,7 | 5 | 1 | 19 | 2013 |
| 16,4 | 28,9 | 0,7 | 5 | 1 | 21 | 1999 |
| 16,4 | 28,9 | 0,7 | 4 | 1 | 18 | 2002 |
| 16,4 | 28,9 | 0,7 | 4 | 1 | 19 | 2013 |
| 15,5 | 24,4 | 0,7 | 4 | 1 | 18 | 1999 |
| 15,5 | 24,4 | 0,7 | 5 | 1 | 19 | 2012 |
| 12,2 | 11,9 | 0,7 | 2 | 1 | 24 | 2006 |
| 12,2 | 11,9 | 0,7 | 2 | 1 | 25 | 2007 |
| 12,2 | 11,9 | 0,7 | 2 | 1 | 21 | 2011 |
| 12,2 | 11,9 | 0,7 | 2 | 1 | 22 | 2011 |
| 13,9 | 17,6 | 0,7 | 3 | 1 | 23 | 2008 |
| 17   | 32,2 | 0,7 | 8 | 1 | 21 | 2013 |
| 17   | 32,2 | 0,7 | 5 | 1 | 20 | 2013 |
| 17   | 32,2 | 0,7 | 6 | 1 | 15 | 2015 |
| 13   | 14,4 | 0,7 | 2 | 1 | 21 | 2000 |
| 13   | 14,4 | 0,7 | 2 | 1 | 22 | 2002 |
| 13   | 14,4 | 0,7 | 2 | 1 | 23 | 2002 |

|      |      |     |   |   |    |      |
|------|------|-----|---|---|----|------|
| 14,6 | 20,4 | 0,7 | 3 | 1 | 16 | 2015 |
| 17,9 | 37,6 | 0,7 | 4 | 1 | 18 | 2015 |
| 11,7 | 10,5 | 0,7 | 2 | 1 | 20 | 2004 |
| 12,3 | 12,2 | 0,7 | 2 | 1 | 23 | 2008 |
| 12,3 | 12,2 | 0,7 | 2 | 1 | 17 | 2014 |
| 15,6 | 24,9 | 0,7 | 6 | 1 | 20 | 2011 |
| 13,6 | 16,5 | 0,7 | 4 | 1 | 21 | 2006 |
| 14   | 18   | 0,7 | 4 | 1 | 20 | 2009 |
| 14   | 18   | 0,7 | 3 | 1 | 20 | 2011 |
| 14   | 18   | 0,7 | 3 | 1 | 16 | 2015 |
| 14,9 | 21,7 | 0,7 | 8 | 1 | 19 | 2011 |
| 18,1 | 38,9 | 0,7 | 6 | 1 | 19 | 2013 |
| 14,5 | 20   | 0,7 | 3 | 1 | 24 | 2001 |
| 14,5 | 20   | 0,7 | 3 | 1 | 23 | 2003 |
| 14,5 | 20   | 0,7 | 4 | 1 | 16 | 2015 |
| 15,3 | 23,5 | 0,7 | 6 | 1 | 27 | 1999 |
| 15,7 | 25,4 | 0,7 | 3 | 1 | 22 | 2001 |
| 15,7 | 25,4 | 0,7 | 5 | 1 | 19 | 2012 |
| 14,1 | 18,4 | 0,7 | 4 | 1 | 18 | 2014 |

|      |      |     |   |   |    |      |
|------|------|-----|---|---|----|------|
| 14,1 | 18,4 | 0,7 | 3 | 1 | 21 | 2014 |
| 14,4 | 19,6 | 0,7 | 2 | 1 | 26 | 2001 |
| 14,4 | 19,6 | 0,7 | 4 | 1 | 19 | 2004 |
| 14,4 | 19,6 | 0,7 | 5 | 1 | 19 | 2007 |
| 14,4 | 19,6 | 0,7 | 3 | 1 | 22 | 2011 |
| 14,4 | 19,6 | 0,7 | 4 | 1 | 20 | 2013 |
| 15,1 | 22,6 | 0,7 | 3 | 1 | 21 | 2003 |
| 15,1 | 22,6 | 0,7 | 3 | 1 | 21 | 2003 |
| 13,2 | 15,1 | 0,7 | 3 | 1 | 20 | 2008 |
| 19,3 | 47,2 | 0,7 | 5 | 1 | 21 | 2010 |
| 19,3 | 47,2 | 0,7 | 5 | 1 | 21 | 2010 |
| 16,1 | 27,4 | 0,7 | 5 | 1 | 18 | 1999 |
| 16,1 | 27,4 | 0,7 | 3 | 1 | 20 | 2013 |
| 14,2 | 18,8 | 0,7 | 5 | 1 | 20 | 2000 |
| 14,2 | 18,8 | 0,7 | 3 | 1 | 26 | 2003 |
| 14,2 | 18,8 | 0,7 | 6 | 1 | 17 | 2008 |
| 14,2 | 18,8 | 0,7 | 4 | 1 | 19 | 2008 |
| 14,2 | 18,8 | 0,7 | 3 | 1 | 21 | 2008 |
| 14,2 | 18,8 | 0,7 | 3 | 1 | 21 | 2015 |

|      |      |     |   |   |    |      |
|------|------|-----|---|---|----|------|
| 14,3 | 19,2 | 0,7 | 7 | 1 | 25 | 1999 |
| 14,3 | 19,2 | 0,7 | 5 | 1 | 26 | 1999 |
| 14,3 | 19,2 | 0,7 | 2 | 1 | 19 | 2000 |
| 14,3 | 19,2 | 0,7 | 3 | 1 | 23 | 2002 |
| 14,3 | 19,2 | 0,7 | 4 | 1 | 23 | 2010 |
| 14,3 | 19,2 | 0,7 | 4 | 1 | 23 | 2010 |
| 13,4 | 15,8 | 0,7 | 2 | 1 | 26 | 2001 |
| 13,4 | 15,8 | 0,7 | 2 | 1 | 20 | 2013 |
| 16,5 | 29,5 | 0,7 | 5 | 1 | 22 | 1999 |
| 16,5 | 29,5 | 0,7 | 5 | 1 | 20 | 2013 |
| 15,9 | 26,4 | 0,7 | 5 | 1 | 25 | 2007 |
| 14,8 | 21,3 | 0,7 | 3 | 1 | 22 | 2011 |
| 21,5 | 65,3 | 0,7 | 5 | 1 | 17 | 2014 |
| 13,7 | 16,9 | 0,7 | 2 | 1 | 27 | 1999 |
| 15   | 22,2 | 0,7 | 3 | 1 | 22 | 2003 |
| 15   | 22,2 | 0,7 | 3 | 1 | 25 | 2007 |
| 15   | 22,2 | 0,7 | 5 | 1 | 20 | 2009 |
| 15,2 | 23,1 | 0,7 | 5 | 1 | 22 | 1999 |
| 15,2 | 23,1 | 0,7 | 5 | 1 | 19 | 2013 |

|      |      |     |   |   |    |      |
|------|------|-----|---|---|----|------|
| 15,5 | 24,5 | 0,7 | 5 | 1 | 21 | 1999 |
| 15,5 | 24,5 | 0,7 | 3 | 1 | 26 | 2001 |
| 15,5 | 24,5 | 0,7 | 4 | 1 | 20 | 2003 |
| 17,1 | 32,9 | 0,7 | 7 | 1 | 19 | 2014 |
| 16,6 | 30,1 | 0,7 | 4 | 1 | 18 | 2002 |
| 11,1 | 9    | 0,7 | 2 | 1 | 23 | 2007 |
| 21,4 | 64,5 | 0,7 | 6 | 1 | 17 | 2014 |
| 13,8 | 17,3 | 0,7 | 2 | 1 | 22 | 2001 |
| 13,1 | 14,8 | 0,7 | 3 | 1 | 23 | 2001 |
| 13,1 | 14,8 | 0,7 | 2 | 1 | 20 | 2002 |
| 13,1 | 14,8 | 0,7 | 3 | 1 | 23 | 2005 |
| 13,1 | 14,8 | 0,7 | 3 | 1 | 25 | 2007 |
| 11,3 | 9,5  | 0,7 | 1 | 1 | 26 | 2001 |
| 11,3 | 9,5  | 0,7 | 2 | 1 | 20 | 2004 |
| 11,3 | 9,5  | 0,7 | 2 | 1 | 18 | 2007 |
| 11,3 | 9,5  | 0,7 | 2 | 1 | 19 | 2007 |
| 13,5 | 16,2 | 0,7 | 4 | 1 | 27 | 1999 |
| 13,5 | 16,2 | 0,7 | 2 | 1 | 15 | 2015 |
| 15,6 | 25   | 0,7 | 4 | 1 | 19 | 2002 |

|      |      |     |   |   |    |      |
|------|------|-----|---|---|----|------|
| 18,5 | 41,7 | 0,7 | 7 | 1 | 18 | 2012 |
| 14,6 | 20,5 | 0,7 | 8 | 1 | 20 | 2000 |
| 14,6 | 20,5 | 0,7 | 4 | 1 | 20 | 2002 |
| 14,6 | 20,5 | 0,7 | 3 | 1 | 23 | 2003 |
| 13,3 | 15,5 | 0,7 | 3 | 1 | 23 | 2008 |
| 13,3 | 15,5 | 0,7 | 2 | 1 | 20 | 2013 |
| 13,3 | 15,5 | 0,7 | 3 | 1 | 22 | 2015 |
| 10,8 | 8,3  | 0,7 | 2 | 1 | 23 | 2004 |
| 15,3 | 23,6 | 0,7 | 4 | 1 | 19 | 2013 |
| 15,7 | 25,5 | 0,7 | 4 | 1 | 21 | 1999 |
| 14,9 | 21,8 | 0,7 | 3 | 1 | 19 | 2012 |
| 12,7 | 13,5 | 0,7 | 2 | 1 | 25 | 1999 |
| 12,7 | 13,5 | 0,7 | 2 | 1 | 26 | 1999 |
| 12,7 | 13,5 | 0,7 | 2 | 1 | 22 | 2005 |
| 12,7 | 13,5 | 0,7 | 2 | 1 | 20 | 2013 |
| 13,9 | 17,7 | 0,7 | 3 | 1 | 19 | 2012 |
| 13,9 | 17,7 | 0,7 | 2 | 1 | 21 | 2014 |
| 13,9 | 17,7 | 0,7 | 2 | 1 | 23 | 2014 |
| 16,7 | 30,7 | 0,7 | 6 | 1 | 19 | 2013 |

|      |      |     |   |   |    |      |
|------|------|-----|---|---|----|------|
| 15,8 | 26   | 0,7 | 3 | 1 | 22 | 2003 |
| 16   | 27   | 0,7 | 5 | 1 | 20 | 1999 |
| 14,5 | 20,1 | 0,7 | 3 | 1 | 23 | 2007 |
| 14,5 | 20,1 | 0,7 | 6 | 1 | 20 | 2013 |
| 15,1 | 22,7 | 0,7 | 4 | 1 | 23 | 2003 |
| 19,8 | 51,2 | 0,7 | 4 | 1 | 19 | 2013 |
| 14   | 18,1 | 0,7 | 2 | 1 | 25 | 1999 |
| 14   | 18,1 | 0,7 | 2 | 1 | 19 | 2001 |
| 14   | 18,1 | 0,7 | 2 | 1 | 24 | 2002 |
| 14   | 18,1 | 0,7 | 3 | 1 | 19 | 2008 |
| 14   | 18,1 | 0,7 | 3 | 1 | 19 | 2014 |
| 14   | 18,1 | 0,7 | 3 | 1 | 18 | 2015 |
| 12   | 11,4 | 0,7 | 3 | 1 | 21 | 2005 |
| 12   | 11,4 | 0,7 | 2 | 1 | 23 | 2007 |
| 12   | 11,4 | 0,7 | 2 | 1 | 23 | 2007 |
| 14,4 | 19,7 | 0,7 | 5 | 1 | 22 | 1999 |
| 15,4 | 24,1 | 0,7 | 4 | 1 | 19 | 2011 |
| 12,6 | 13,2 | 0,7 | 2 | 1 | 23 | 2010 |
| 12,6 | 13,2 | 0,7 | 2 | 1 | 23 | 2010 |

|      |      |     |   |   |    |      |
|------|------|-----|---|---|----|------|
| 11,6 | 10,3 | 0,7 | 1 | 1 | 26 | 2001 |
| 11,6 | 10,3 | 0,7 | 2 | 1 | 21 | 2006 |
| 13,6 | 16,6 | 0,7 | 2 | 1 | 24 | 2001 |
| 14,1 | 18,5 | 0,7 | 6 | 1 | 23 | 2008 |
| 13   | 14,5 | 0,7 | 2 | 1 | 21 | 2006 |
| 13   | 14,5 | 0,7 | 3 | 1 | 25 | 2007 |
| 13   | 14,5 | 0,7 | 2 | 1 | 25 | 2007 |
| 13   | 14,5 | 0,7 | 2 | 1 | 21 | 2008 |
| 13   | 14,5 | 0,7 | 2 | 1 | 17 | 2014 |
| 14,3 | 19,3 | 0,7 | 4 | 1 | 23 | 1999 |
| 14,3 | 19,3 | 0,7 | 3 | 1 | 19 | 2000 |
| 14,3 | 19,3 | 0,7 | 4 | 1 | 17 | 2012 |
| 14,3 | 19,3 | 0,7 | 4 | 1 | 15 | 2015 |
| 14,3 | 19,3 | 0,7 | 3 | 1 | 18 | 2015 |
| 14,2 | 18,9 | 0,7 | 3 | 1 | 21 | 2005 |
| 14,2 | 18,9 | 0,7 | 3 | 1 | 20 | 2008 |
| 14,2 | 18,9 | 0,7 | 4 | 1 | 20 | 2008 |
| 14,2 | 18,9 | 0,7 | 3 | 1 | 21 | 2008 |
| 14,2 | 18,9 | 0,7 | 4 | 1 | 19 | 2012 |

|      |      |     |   |   |    |      |
|------|------|-----|---|---|----|------|
| 14,8 | 21,4 | 0,7 | 4 | 1 | 21 | 1999 |
| 18,5 | 41,8 | 0,7 | 7 | 1 | 17 | 2014 |
| 16,6 | 30,2 | 0,7 | 4 | 1 | 18 | 2012 |
| 17,6 | 36   | 0,7 | 5 | 1 | 19 | 2012 |
| 12,1 | 11,7 | 0,7 | 2 | 1 | 19 | 2014 |
| 19   | 45,3 | 0,7 | 9 | 1 | 19 | 2010 |
| 19   | 45,3 | 0,7 | 9 | 1 | 19 | 2010 |
| 19   | 45,3 | 0,7 | 6 | 1 | 20 | 2013 |
| 17,5 | 35,4 | 0,7 | 6 | 1 | 19 | 2000 |
| 15,5 | 24,6 | 0,7 | 4 | 1 | 20 | 2013 |
| 18,9 | 44,6 | 0,7 | 8 | 1 | 19 | 2013 |
| 15,2 | 23,2 | 0,7 | 3 | 1 | 16 | 2008 |
| 15,2 | 23,2 | 0,7 | 3 | 1 | 19 | 2014 |
| 15   | 22,3 | 0,7 | 3 | 1 | 17 | 2002 |
| 15   | 22,3 | 0,7 | 4 | 1 | 25 | 2002 |
| 15   | 22,3 | 0,7 | 5 | 1 | 20 | 2009 |
| 13,4 | 15,9 | 0,7 | 3 | 1 | 25 | 1999 |
| 13,4 | 15,9 | 0,7 | 5 | 1 | 23 | 2007 |
| 13,4 | 15,9 | 0,7 | 2 | 1 | 20 | 2008 |

|      |      |     |    |   |    |      |
|------|------|-----|----|---|----|------|
| 12,2 | 12   | 0,7 | 2  | 1 | 20 | 2002 |
| 12,2 | 12   | 0,7 | 2  | 1 | 25 | 2007 |
| 12,4 | 12,6 | 0,7 | 2  | 1 | 22 | 2002 |
| 12,4 | 12,6 | 0,7 | 2  | 1 | 26 | 2009 |
| 13,2 | 15,2 | 0,7 | 4  | 1 | 26 | 1999 |
| 13,2 | 15,2 | 0,7 | 3  | 1 | 23 | 2008 |
| 13,2 | 15,2 | 0,7 | 3  | 1 | 20 | 2011 |
| 16,2 | 28,1 | 0,7 | 6  | 1 | 19 | 2007 |
| 16,2 | 28,1 | 0,7 | 10 | 1 | 20 | 2011 |
| 12,3 | 12,3 | 0,7 | 2  | 1 | 20 | 2002 |
| 12,3 | 12,3 | 0,7 | 2  | 1 | 23 | 2005 |
| 12,3 | 12,3 | 0,7 | 2  | 1 | 25 | 2007 |
| 14,7 | 21   | 0,7 | 3  | 1 | 22 | 2000 |
| 13,7 | 17   | 0,7 | 4  | 1 | 22 | 2009 |
| 15,6 | 25,1 | 0,7 | 5  | 1 | 18 | 1999 |
| 11   | 8,8  | 0,7 | 2  | 1 | 22 | 2004 |
| 11   | 8,8  | 0,7 | 2  | 1 | 25 | 2004 |
| 11   | 8,8  | 0,7 | 2  | 1 | 26 | 2009 |
| 16,1 | 27,6 | 0,7 | 4  | 1 | 20 | 2001 |

|      |      |     |   |   |    |      |
|------|------|-----|---|---|----|------|
| 11,4 | 9,8  | 0,7 | 2 | 1 | 23 | 2004 |
| 17   | 32,5 | 0,7 | 5 | 1 | 19 | 2014 |
| 15,7 | 25,6 | 0,7 | 7 | 1 | 25 | 1999 |
| 15,7 | 25,6 | 0,7 | 6 | 1 | 22 | 2003 |
| 15,8 | 26,1 | 0,7 | 4 | 1 | 23 | 2002 |
| 15,3 | 23,7 | 0,7 | 4 | 1 | 23 | 2002 |
| 15,3 | 23,7 | 0,7 | 4 | 1 | 21 | 2009 |
| 17,7 | 36,7 | 0,7 | 5 | 1 | 18 | 2000 |
| 21   | 61,3 | 0,7 | 7 | 1 | 18 | 2012 |
| 14,6 | 20,6 | 0,7 | 3 | 1 | 27 | 1999 |
| 14,6 | 20,6 | 0,7 | 6 | 1 | 25 | 2007 |
| 14,6 | 20,6 | 0,7 | 4 | 1 | 21 | 2011 |
| 11,2 | 9,3  | 0,7 | 1 | 1 | 24 | 2009 |
| 16,4 | 29,2 | 0,7 | 5 | 1 | 18 | 2001 |
| 16,4 | 29,2 | 0,7 | 3 | 1 | 23 | 2015 |
| 18,6 | 42,6 | 0,7 | 8 | 1 | 22 | 2013 |
| 14,9 | 21,9 | 0,7 | 4 | 1 | 20 | 1999 |
| 14,9 | 21,9 | 0,7 | 3 | 1 | 23 | 2007 |
| 13,8 | 17,4 | 0,7 | 4 | 1 | 23 | 1999 |

|      |      |     |   |   |    |      |
|------|------|-----|---|---|----|------|
| 13,8 | 17,4 | 0,7 | 3 | 1 | 20 | 2002 |
| 15,1 | 22,8 | 0,7 | 3 | 1 | 26 | 2003 |
| 15,1 | 22,8 | 0,7 | 4 | 1 | 16 | 2015 |
| 17,2 | 33,7 | 0,7 | 9 | 1 | 18 | 2000 |
| 16,6 | 30,3 | 0,7 | 3 | 1 | 21 | 2003 |
| 13,5 | 16,3 | 0,7 | 2 | 1 | 19 | 2000 |
| 13,5 | 16,3 | 0,7 | 2 | 1 | 26 | 2000 |
| 13,5 | 16,3 | 0,7 | 2 | 1 | 23 | 2003 |
| 13,5 | 16,3 | 0,7 | 4 | 1 | 26 | 2006 |
| 13,5 | 16,3 | 0,7 | 3 | 1 | 18 | 2008 |
| 13,5 | 16,3 | 0,7 | 3 | 1 | 20 | 2011 |
| 13,5 | 16,3 | 0,7 | 3 | 1 | 18 | 2015 |
| 14,5 | 20,2 | 0,7 | 4 | 1 | 21 | 1999 |
| 14,5 | 20,2 | 0,7 | 5 | 1 | 22 | 2004 |
| 15,4 | 24,2 | 0,7 | 5 | 1 | 18 | 1999 |
| 15,4 | 24,2 | 0,7 | 4 | 1 | 24 | 2001 |
| 15,4 | 24,2 | 0,7 | 4 | 1 | 22 | 2004 |
| 13,1 | 14,9 | 0,7 | 3 | 1 | 15 | 2015 |
| 13,9 | 17,8 | 0,7 | 3 | 1 | 25 | 2007 |

|      |      |     |   |   |    |      |
|------|------|-----|---|---|----|------|
| 12,8 | 13,9 | 0,7 | 5 | 1 | 23 | 2010 |
| 12,8 | 13,9 | 0,7 | 5 | 1 | 23 | 2010 |
| 13,3 | 15,6 | 0,7 | 3 | 1 | 22 | 2005 |
| 13,3 | 15,6 | 0,7 | 2 | 1 | 22 | 2011 |
| 13,3 | 15,6 | 0,7 | 2 | 1 | 19 | 2013 |
| 13,3 | 15,6 | 0,7 | 2 | 1 | 19 | 2013 |
| 13,3 | 15,6 | 0,7 | 3 | 1 | 19 | 2014 |
| 14,4 | 19,8 | 0,7 | 4 | 1 | 26 | 2003 |
| 17,8 | 37,4 | 0,7 | 5 | 1 | 21 | 2013 |
| 14,8 | 21,5 | 0,7 | 4 | 1 | 23 | 2006 |
| 14   | 18,2 | 0,7 | 3 | 1 | 25 | 2003 |
| 14   | 18,2 | 0,7 | 5 | 1 | 23 | 2007 |
| 14   | 18,2 | 0,7 | 4 | 1 | 15 | 2015 |
| 16,5 | 29,8 | 0,7 | 9 | 1 | 20 | 2000 |
| 11,8 | 10,9 | 0,7 | 2 | 1 | 22 | 1999 |
| 14,3 | 19,4 | 0,7 | 5 | 1 | 18 | 2000 |
| 14,3 | 19,4 | 0,7 | 2 | 1 | 21 | 2000 |
| 16,7 | 30,9 | 0,7 | 3 | 1 | 19 | 2000 |
| 15,2 | 23,3 | 0,7 | 5 | 1 | 19 | 2000 |

|      |      |     |   |   |    |      |
|------|------|-----|---|---|----|------|
| 15,2 | 23,3 | 0,7 | 4 | 1 | 24 | 2009 |
| 14,1 | 18,6 | 0,7 | 5 | 1 | 22 | 2007 |
| 14,2 | 19   | 0,7 | 4 | 1 | 26 | 1999 |
| 14,2 | 19   | 0,7 | 4 | 1 | 18 | 2008 |
| 15   | 22,4 | 0,7 | 4 | 1 | 25 | 2003 |
| 15   | 22,4 | 0,7 | 5 | 1 | 17 | 2014 |
| 15,6 | 25,2 | 0,7 | 4 | 1 | 19 | 2012 |
| 13,6 | 16,7 | 0,7 | 2 | 1 | 22 | 2000 |
| 13,6 | 16,7 | 0,7 | 4 | 1 | 23 | 2009 |
| 12,7 | 13,6 | 0,7 | 2 | 1 | 20 | 2002 |
| 12,7 | 13,6 | 0,7 | 2 | 1 | 26 | 2009 |
| 17,1 | 33,2 | 0,7 | 5 | 1 | 20 | 2013 |
| 17,6 | 36,2 | 0,7 | 7 | 1 | 19 | 2012 |
| 16   | 27,2 | 0,7 | 8 | 1 | 16 | 2008 |
| 11,5 | 10,1 | 0,7 | 2 | 1 | 23 | 2004 |
| 15,7 | 25,7 | 0,7 | 5 | 1 | 19 | 2014 |
| 14,7 | 21,1 | 0,7 | 4 | 1 | 18 | 1999 |
| 14,7 | 21,1 | 0,7 | 6 | 1 | 21 | 1999 |
| 16,4 | 29,3 | 0,7 | 5 | 1 | 20 | 1999 |

|      |      |     |   |   |    |      |
|------|------|-----|---|---|----|------|
| 17,3 | 34,4 | 0,7 | 5 | 1 | 19 | 2012 |
| 15,3 | 23,8 | 0,7 | 5 | 1 | 25 | 2004 |
| 13   | 14,6 | 0,7 | 2 | 1 | 19 | 2000 |
| 13   | 14,6 | 0,7 | 2 | 1 | 24 | 2002 |
| 13   | 14,6 | 0,7 | 3 | 1 | 23 | 2008 |
| 13   | 14,6 | 0,7 | 3 | 1 | 25 | 2008 |
| 16,6 | 30,4 | 0,7 | 5 | 1 | 22 | 2004 |
| 12,6 | 13,3 | 0,7 | 3 | 1 | 25 | 2007 |
| 13,4 | 16   | 0,7 | 3 | 1 | 21 | 2000 |
| 16,3 | 28,8 | 0,7 | 7 | 1 | 19 | 2012 |
| 13,7 | 17,1 | 0,7 | 3 | 1 | 26 | 2000 |
| 13,7 | 17,1 | 0,7 | 2 | 1 | 20 | 2002 |
| 13,7 | 17,1 | 0,7 | 2 | 1 | 24 | 2009 |
| 13,7 | 17,1 | 0,7 | 4 | 1 | 18 | 2015 |
| 16,9 | 32,1 | 0,7 | 5 | 1 | 21 | 2012 |
| 18,9 | 44,9 | 0,7 | 9 | 1 | 17 | 2012 |
| 18,9 | 44,9 | 0,7 | 6 | 1 | 20 | 2013 |
| 15,1 | 22,9 | 0,7 | 5 | 1 | 21 | 2000 |
| 15,1 | 22,9 | 0,7 | 4 | 1 | 23 | 2006 |

|      |      |     |   |   |    |      |
|------|------|-----|---|---|----|------|
| 15,1 | 22,9 | 0,7 | 6 | 1 | 20 | 2013 |
| 14,6 | 20,7 | 0,7 | 4 | 1 | 21 | 2012 |
| 13,2 | 15,3 | 0,7 | 2 | 1 | 19 | 2000 |
| 11,3 | 9,6  | 0,7 | 2 | 1 | 23 | 2004 |
| 15,4 | 24,3 | 0,7 | 5 | 1 | 21 | 2000 |
| 15,4 | 24,3 | 0,7 | 6 | 1 | 18 | 2001 |
| 15,4 | 24,3 | 0,7 | 4 | 1 | 25 | 2002 |
| 15,4 | 24,3 | 0,7 | 4 | 1 | 21 | 2012 |
| 12   | 11,5 | 0,7 | 3 | 1 | 23 | 2005 |
| 12   | 11,5 | 0,7 | 2 | 1 | 23 | 2007 |
| 12   | 11,5 | 0,7 | 2 | 1 | 22 | 2011 |
| 12,5 | 13   | 0,7 | 2 | 1 | 23 | 2006 |
| 12,5 | 13   | 0,7 | 2 | 1 | 21 | 2011 |
| 16,5 | 29,9 | 0,7 | 5 | 1 | 18 | 1999 |
| 16,5 | 29,9 | 0,7 | 5 | 1 | 23 | 2010 |
| 16,5 | 29,9 | 0,7 | 5 | 1 | 23 | 2010 |
| 14,5 | 20,3 | 0,7 | 4 | 1 | 15 | 2015 |
| 13,8 | 17,5 | 0,7 | 3 | 1 | 22 | 2000 |
| 15,5 | 24,8 | 0,7 | 4 | 1 | 19 | 2002 |

|      |      |     |   |   |    |      |
|------|------|-----|---|---|----|------|
| 12,1 | 11,8 | 0,7 | 2 | 1 | 25 | 2007 |
| 12,1 | 11,8 | 0,7 | 2 | 1 | 21 | 2014 |
| 12,1 | 11,8 | 0,7 | 2 | 1 | 23 | 2014 |
| 12,4 | 12,7 | 0,7 | 3 | 1 | 23 | 2005 |
| 12,4 | 12,7 | 0,7 | 2 | 1 | 20 | 2013 |
| 19,3 | 47,9 | 0,7 | 5 | 1 | 19 | 2013 |
| 17,3 | 34,5 | 0,7 | 5 | 1 | 19 | 2000 |
| 12,2 | 12,1 | 0,7 | 2 | 1 | 25 | 2003 |
| 12,2 | 12,1 | 0,7 | 2 | 1 | 22 | 2007 |
| 12,3 | 12,4 | 0,7 | 2 | 1 | 23 | 1999 |
| 12,3 | 12,4 | 0,7 | 2 | 1 | 25 | 2007 |
| 12,3 | 12,4 | 0,7 | 2 | 1 | 21 | 2008 |
| 14,4 | 19,9 | 0,7 | 4 | 1 | 23 | 2002 |
| 16   | 27,3 | 0,7 | 4 | 1 | 22 | 2000 |
| 16   | 27,3 | 0,7 | 6 | 1 | 23 | 2001 |
| 16   | 27,3 | 0,7 | 4 | 1 | 19 | 2012 |
| 16,4 | 29,4 | 0,7 | 5 | 1 | 20 | 2013 |
| 13,5 | 16,4 | 0,7 | 2 | 1 | 23 | 2002 |
| 15   | 22,5 | 0,7 | 5 | 1 | 22 | 1999 |

|      |      |     |   |   |    |      |
|------|------|-----|---|---|----|------|
| 15   | 22,5 | 0,7 | 4 | 1 | 16 | 2015 |
| 15,7 | 25,8 | 0,7 | 5 | 1 | 19 | 2000 |
| 15,9 | 26,8 | 0,7 | 5 | 1 | 22 | 2001 |
| 15,9 | 26,8 | 0,7 | 4 | 1 | 22 | 2013 |
| 16,6 | 30,5 | 0,7 | 4 | 1 | 20 | 2013 |
| 15,8 | 26,3 | 0,7 | 6 | 1 | 22 | 2007 |
| 15,8 | 26,3 | 0,7 | 6 | 1 | 21 | 2013 |
| 14,3 | 19,5 | 0,7 | 5 | 1 | 18 | 1999 |
| 14,3 | 19,5 | 0,7 | 5 | 1 | 18 | 2000 |
| 14,3 | 19,5 | 0,7 | 2 | 1 | 25 | 2002 |
| 14,3 | 19,5 | 0,7 | 6 | 1 | 20 | 2011 |
| 14,3 | 19,5 | 0,7 | 3 | 1 | 21 | 2012 |
| 14,3 | 19,5 | 0,7 | 4 | 1 | 19 | 2012 |
| 14   | 18,3 | 0,7 | 3 | 1 | 26 | 2003 |
| 14   | 18,3 | 0,7 | 3 | 1 | 20 | 2007 |
| 14   | 18,3 | 0,7 | 5 | 1 | 25 | 2007 |
| 14   | 18,3 | 0,7 | 3 | 1 | 20 | 2011 |
| 14,2 | 19,1 | 0,7 | 4 | 1 | 22 | 1999 |
| 14,1 | 18,7 | 0,7 | 5 | 1 | 19 | 1999 |

|      |      |     |   |   |    |      |
|------|------|-----|---|---|----|------|
| 14,1 | 18,7 | 0,7 | 3 | 1 | 23 | 2007 |
| 14,1 | 18,7 | 0,7 | 3 | 1 | 21 | 2014 |
| 14,1 | 18,7 | 0,7 | 3 | 1 | 23 | 2014 |
| 13,1 | 15   | 0,7 | 2 | 1 | 24 | 2001 |
| 13,1 | 15   | 0,7 | 3 | 1 | 25 | 2008 |
| 15,3 | 23,9 | 0,7 | 5 | 1 | 18 | 2007 |
| 15,3 | 23,9 | 0,7 | 4 | 1 | 22 | 2011 |
| 15,3 | 23,9 | 0,7 | 5 | 1 | 22 | 2013 |
| 16,3 | 28,9 | 0,7 | 5 | 1 | 22 | 2002 |
| 13,3 | 15,7 | 0,7 | 3 | 1 | 22 | 2000 |
| 13,3 | 15,7 | 0,7 | 2 | 1 | 22 | 2003 |
| 13,3 | 15,7 | 0,7 | 3 | 1 | 25 | 2005 |
| 13,3 | 15,7 | 0,7 | 3 | 1 | 23 | 2006 |
| 13,3 | 15,7 | 0,7 | 5 | 1 | 20 | 2013 |
| 14,7 | 21,2 | 0,7 | 4 | 1 | 18 | 1999 |
| 20   | 53,4 | 0,7 | 6 | 1 | 18 | 2012 |
| 12,8 | 14   | 0,7 | 3 | 1 | 22 | 2011 |
| 17   | 32,8 | 0,7 | 5 | 1 | 21 | 2014 |
| 24,3 | 95,8 | 0,7 | 9 | 1 | 15 | 2015 |

|      |      |     |    |   |    |      |
|------|------|-----|----|---|----|------|
| 19   | 45,8 | 0,7 | 8  | 1 | 20 | 2013 |
| 17,9 | 38,3 | 0,7 | 4  | 1 | 18 | 2012 |
| 18,4 | 41,6 | 0,7 | 5  | 1 | 18 | 2012 |
| 16,5 | 30   | 0,7 | 9  | 1 | 22 | 2004 |
| 13,6 | 16,8 | 0,7 | 2  | 1 | 27 | 1999 |
| 13,6 | 16,8 | 0,7 | 4  | 1 | 21 | 2006 |
| 15,1 | 23   | 0,7 | 4  | 1 | 21 | 2006 |
| 11,7 | 10,7 | 0,7 | 2  | 1 | 23 | 1999 |
| 15,4 | 24,4 | 0,7 | 3  | 1 | 20 | 2003 |
| 15,4 | 24,4 | 0,7 | 4  | 1 | 20 | 2011 |
| 15,4 | 24,4 | 0,7 | 10 | 1 | 19 | 2012 |
| 14,9 | 22,1 | 0,7 | 5  | 1 | 25 | 1999 |
| 11,4 | 9,9  | 0,7 | 2  | 1 | 22 | 2011 |
| 17,3 | 34,6 | 0,7 | 5  | 1 | 21 | 2001 |
| 14,6 | 20,8 | 0,7 | 3  | 1 | 25 | 2004 |
| 14,6 | 20,8 | 0,7 | 7  | 1 | 22 | 2009 |
| 14,6 | 20,8 | 0,7 | 5  | 1 | 22 | 2011 |
| 18,2 | 40,3 | 0,7 | 8  | 1 | 19 | 2013 |
| 16,1 | 27,9 | 0,7 | 5  | 1 | 21 | 2013 |

|      |      |     |   |   |    |      |
|------|------|-----|---|---|----|------|
| 16,1 | 27,9 | 0,7 | 7 | 1 | 19 | 2014 |
| 15,5 | 24,9 | 0,7 | 4 | 1 | 23 | 2011 |
| 15,5 | 24,9 | 0,7 | 3 | 1 | 22 | 2011 |
| 11   | 8,9  | 0,7 | 2 | 1 | 22 | 2004 |
| 11   | 8,9  | 0,7 | 2 | 1 | 22 | 2004 |
| 11   | 8,9  | 0,7 | 2 | 1 | 25 | 2004 |
| 11   | 8,9  | 0,7 | 1 | 1 | 26 | 2009 |
| 18   | 39   | 0,7 | 6 | 1 | 22 | 2013 |
| 20   | 53,5 | 0,7 | 7 | 1 | 17 | 2014 |
| 12,7 | 13,7 | 0,7 | 3 | 1 | 25 | 2005 |
| 12,7 | 13,7 | 0,7 | 2 | 1 | 17 | 2014 |
| 13,7 | 17,2 | 0,7 | 4 | 1 | 27 | 1999 |
| 13,7 | 17,2 | 0,7 | 4 | 1 | 25 | 2005 |
| 16   | 27,4 | 0,7 | 4 | 1 | 23 | 2002 |
| 16   | 27,4 | 0,7 | 6 | 1 | 20 | 2013 |
| 16,6 | 30,6 | 0,7 | 7 | 1 | 22 | 2002 |
| 16,6 | 30,6 | 0,7 | 5 | 1 | 17 | 2012 |
| 10,2 | 7,1  | 0,7 | 2 | 1 | 25 | 2004 |
| 13   | 14,7 | 0,7 | 3 | 1 | 23 | 2007 |

|      |      |     |   |   |    |      |
|------|------|-----|---|---|----|------|
| 13   | 14,7 | 0,7 | 3 | 1 | 18 | 2014 |
| 13,4 | 16,1 | 0,7 | 2 | 1 | 21 | 2000 |
| 13,4 | 16,1 | 0,7 | 3 | 1 | 21 | 2008 |
| 13,4 | 16,1 | 0,7 | 3 | 1 | 25 | 2008 |
| 14,5 | 20,4 | 0,7 | 3 | 1 | 24 | 2001 |
| 14,5 | 20,4 | 0,7 | 3 | 1 | 22 | 2002 |
| 14,5 | 20,4 | 0,7 | 4 | 1 | 25 | 2005 |
| 14,5 | 20,4 | 0,7 | 5 | 1 | 22 | 2007 |
| 14,5 | 20,4 | 0,7 | 4 | 1 | 22 | 2011 |
| 15,2 | 23,5 | 0,7 | 3 | 1 | 26 | 2000 |
| 15,2 | 23,5 | 0,7 | 6 | 1 | 19 | 2001 |
| 15,7 | 25,9 | 0,7 | 3 | 1 | 20 | 2003 |
| 15,8 | 26,4 | 0,7 | 9 | 1 | 26 | 2001 |
| 15,8 | 26,4 | 0,7 | 4 | 1 | 21 | 2015 |
| 17,6 | 36,5 | 0,7 | 5 | 1 | 19 | 2010 |
| 17,6 | 36,5 | 0,7 | 5 | 1 | 19 | 2010 |
| 13,2 | 15,4 | 0,7 | 3 | 1 | 22 | 2000 |
| 13,2 | 15,4 | 0,7 | 5 | 1 | 26 | 2000 |
| 13,2 | 15,4 | 0,7 | 3 | 1 | 23 | 2005 |

|      |      |     |   |   |    |      |
|------|------|-----|---|---|----|------|
| 13,2 | 15,4 | 0,7 | 3 | 1 | 25 | 2007 |
| 13,2 | 15,4 | 0,7 | 3 | 1 | 19 | 2008 |
| 13,2 | 15,4 | 0,7 | 3 | 1 | 23 | 2008 |
| 13,8 | 17,6 | 0,7 | 2 | 1 | 26 | 2001 |
| 13,8 | 17,6 | 0,7 | 3 | 1 | 21 | 2008 |
| 14,4 | 20   | 0,7 | 3 | 1 | 21 | 2000 |
| 14,4 | 20   | 0,7 | 5 | 1 | 26 | 2000 |
| 14,4 | 20   | 0,7 | 3 | 1 | 25 | 2003 |
| 12,6 | 13,4 | 0,7 | 2 | 1 | 26 | 2000 |
| 12,6 | 13,4 | 0,7 | 2 | 1 | 20 | 2002 |
| 12,6 | 13,4 | 0,7 | 2 | 1 | 23 | 2010 |
| 12,6 | 13,4 | 0,7 | 2 | 1 | 23 | 2010 |
| 17,1 | 33,5 | 0,7 | 6 | 1 | 21 | 2013 |
| 15,3 | 24   | 0,7 | 5 | 1 | 20 | 1999 |
| 15,3 | 24   | 0,7 | 5 | 1 | 21 | 1999 |
| 15,3 | 24   | 0,7 | 6 | 1 | 19 | 2008 |
| 14,3 | 19,6 | 0,7 | 6 | 1 | 25 | 1999 |
| 19,5 | 49,7 | 0,7 | 7 | 1 | 20 | 2013 |
| 16,2 | 28,5 | 0,7 | 6 | 1 | 19 | 2000 |

|      |      |     |   |   |    |      |
|------|------|-----|---|---|----|------|
| 16,2 | 28,5 | 0,7 | 4 | 1 | 24 | 2002 |
| 14   | 18,4 | 0,7 | 2 | 1 | 26 | 2000 |
| 14   | 18,4 | 0,7 | 3 | 1 | 18 | 2002 |
| 14   | 18,4 | 0,7 | 6 | 1 | 21 | 2013 |
| 14   | 18,4 | 0,7 | 4 | 1 | 23 | 2015 |
| 14,2 | 19,2 | 0,7 | 4 | 1 | 26 | 1999 |
| 14,2 | 19,2 | 0,7 | 3 | 1 | 22 | 2003 |
| 13,5 | 16,5 | 0,7 | 2 | 1 | 25 | 2005 |
| 13,5 | 16,5 | 0,7 | 4 | 1 | 22 | 2011 |
| 11,5 | 10,2 | 0,7 | 2 | 1 | 25 | 2004 |
| 12,5 | 13,1 | 0,7 | 2 | 1 | 26 | 1999 |
| 12,5 | 13,1 | 0,7 | 2 | 1 | 20 | 2013 |
| 12,9 | 14,4 | 0,7 | 3 | 1 | 21 | 2008 |
| 15,4 | 24,5 | 0,7 | 4 | 1 | 20 | 2011 |
| 16,1 | 28   | 0,7 | 6 | 1 | 19 | 2011 |
| 16,1 | 28   | 0,7 | 4 | 1 | 22 | 2011 |
| 15,1 | 23,1 | 0,7 | 5 | 1 | 18 | 2007 |
| 15,1 | 23,1 | 0,7 | 4 | 1 | 22 | 2011 |
| 16,4 | 29,6 | 0,7 | 6 | 1 | 23 | 2001 |

|      |      |     |   |   |    |      |
|------|------|-----|---|---|----|------|
| 14,9 | 22,2 | 0,7 | 5 | 1 | 18 | 2007 |
| 16,6 | 30,7 | 0,7 | 6 | 1 | 21 | 1999 |
| 16,6 | 30,7 | 0,7 | 4 | 1 | 15 | 2015 |
| 17,9 | 38,5 | 0,7 | 7 | 1 | 19 | 2012 |
| 12   | 11,6 | 0,7 | 2 | 1 | 26 | 2009 |
| 12,4 | 12,8 | 0,7 | 3 | 1 | 23 | 2004 |
| 12,4 | 12,8 | 0,7 | 2 | 1 | 24 | 2009 |
| 14,6 | 20,9 | 0,7 | 4 | 1 | 22 | 2002 |
| 13,3 | 15,8 | 0,7 | 3 | 1 | 19 | 2011 |
| 13,1 | 15,1 | 0,7 | 2 | 1 | 20 | 2000 |
| 13,1 | 15,1 | 0,7 | 3 | 1 | 19 | 2006 |
| 15,6 | 25,5 | 0,7 | 5 | 1 | 18 | 2000 |
| 15,6 | 25,5 | 0,7 | 5 | 1 | 22 | 2000 |
| 17   | 33   | 0,7 | 6 | 1 | 20 | 2013 |
| 15,9 | 27   | 0,7 | 5 | 1 | 22 | 2013 |
| 12,1 | 11,9 | 0,7 | 2 | 1 | 23 | 2005 |
| 12,3 | 12,5 | 0,7 | 3 | 1 | 26 | 1999 |
| 12,3 | 12,5 | 0,7 | 2 | 1 | 22 | 2011 |
| 15,7 | 26   | 0,7 | 5 | 1 | 19 | 1999 |

|      |      |     |   |   |    |      |
|------|------|-----|---|---|----|------|
| 15,7 | 26   | 0,7 | 6 | 1 | 20 | 2000 |
| 16,3 | 29,1 | 0,7 | 5 | 1 | 19 | 2013 |
| 15,2 | 23,6 | 0,7 | 5 | 1 | 20 | 2000 |
| 15,2 | 23,6 | 0,7 | 5 | 1 | 23 | 2002 |
| 17,3 | 34,8 | 0,7 | 4 | 1 | 21 | 2012 |
| 11,3 | 9,7  | 0,7 | 2 | 1 | 22 | 2007 |
| 16,5 | 30,2 | 0,7 | 5 | 1 | 18 | 2000 |
| 16,5 | 30,2 | 0,7 | 7 | 1 | 19 | 2015 |
| 14,5 | 20,5 | 0,7 | 3 | 1 | 21 | 2008 |
| 14,5 | 20,5 | 0,7 | 3 | 1 | 23 | 2008 |
| 14,8 | 21,8 | 0,7 | 4 | 1 | 21 | 1999 |
| 14,8 | 21,8 | 0,7 | 4 | 1 | 27 | 1999 |
| 14,8 | 21,8 | 0,7 | 3 | 1 | 25 | 2007 |
| 14,8 | 21,8 | 0,7 | 5 | 1 | 25 | 2007 |
| 14,8 | 21,8 | 0,7 | 4 | 1 | 21 | 2012 |
| 15   | 22,7 | 0,7 | 3 | 1 | 19 | 2000 |
| 16,8 | 31,9 | 0,7 | 4 | 1 | 16 | 2015 |
| 16,8 | 31,9 | 0,7 | 4 | 1 | 16 | 2015 |
| 13,7 | 17,3 | 0,7 | 4 | 1 | 26 | 1999 |

|      |      |     |   |   |    |      |
|------|------|-----|---|---|----|------|
| 13,7 | 17,3 | 0,7 | 7 | 1 | 22 | 2002 |
| 13,7 | 17,3 | 0,7 | 3 | 1 | 19 | 2015 |
| 15,3 | 24,1 | 0,7 | 4 | 1 | 22 | 2003 |
| 15,3 | 24,1 | 0,7 | 3 | 1 | 26 | 2003 |
| 15,3 | 24,1 | 0,7 | 4 | 1 | 22 | 2015 |
| 14,4 | 20,1 | 0,7 | 3 | 1 | 26 | 2005 |
| 14,4 | 20,1 | 0,7 | 4 | 1 | 19 | 2012 |
| 13,4 | 16,2 | 0,7 | 4 | 1 | 22 | 2002 |
| 16,9 | 32,5 | 0,7 | 6 | 1 | 19 | 2013 |
| 16,9 | 32,5 | 0,7 | 9 | 1 | 17 | 2014 |
| 16,1 | 28,1 | 0,7 | 6 | 1 | 20 | 2007 |
| 13,8 | 17,7 | 0,7 | 2 | 1 | 27 | 1999 |
| 13,8 | 17,7 | 0,7 | 2 | 1 | 27 | 1999 |
| 15,4 | 24,6 | 0,7 | 4 | 1 | 21 | 2000 |
| 13   | 14,8 | 0,7 | 3 | 1 | 20 | 2002 |
| 13   | 14,8 | 0,7 | 3 | 1 | 23 | 2005 |
| 14,3 | 19,7 | 0,7 | 2 | 1 | 27 | 1999 |
| 14,3 | 19,7 | 0,7 | 3 | 1 | 18 | 2012 |
| 14,3 | 19,7 | 0,7 | 2 | 1 | 21 | 2013 |

|      |      |     |   |   |    |      |
|------|------|-----|---|---|----|------|
| 14,7 | 21,4 | 0,7 | 3 | 1 | 18 | 1999 |
| 12,7 | 13,8 | 0,7 | 2 | 1 | 19 | 2011 |
| 17   | 33,1 | 0,7 | 7 | 1 | 22 | 2013 |
| 16   | 27,6 | 0,7 | 5 | 1 | 21 | 1999 |
| 16   | 27,6 | 0,7 | 4 | 1 | 18 | 2001 |
| 15,1 | 23,2 | 0,7 | 3 | 1 | 20 | 2003 |
| 13,2 | 15,5 | 0,7 | 2 | 1 | 22 | 2002 |
| 13,2 | 15,5 | 0,7 | 3 | 1 | 23 | 2007 |
| 13,2 | 15,5 | 0,7 | 4 | 1 | 16 | 2008 |
| 13,2 | 15,5 | 0,7 | 2 | 1 | 18 | 2014 |
| 17,1 | 33,7 | 0,7 | 6 | 1 | 19 | 2012 |
| 15,5 | 25,1 | 0,7 | 5 | 1 | 19 | 2005 |
| 17,3 | 34,9 | 0,7 | 7 | 1 | 21 | 2014 |
| 14,2 | 19,3 | 0,7 | 2 | 1 | 24 | 2002 |
| 14,2 | 19,3 | 0,7 | 4 | 1 | 21 | 2006 |
| 14,2 | 19,3 | 0,7 | 3 | 1 | 23 | 2008 |
| 14,2 | 19,3 | 0,7 | 4 | 1 | 22 | 2011 |
| 14   | 18,5 | 0,7 | 5 | 1 | 23 | 1999 |
| 14   | 18,5 | 0,7 | 5 | 1 | 20 | 2010 |

|      |      |     |   |   |    |      |
|------|------|-----|---|---|----|------|
| 14   | 18,5 | 0,7 | 5 | 1 | 20 | 2010 |
| 14,1 | 18,9 | 0,7 | 2 | 1 | 26 | 2003 |
| 14,1 | 18,9 | 0,7 | 4 | 1 | 18 | 2008 |
| 14,1 | 18,9 | 0,7 | 4 | 1 | 19 | 2008 |
| 11,7 | 10,8 | 0,7 | 2 | 1 | 22 | 2007 |
| 15,8 | 26,6 | 0,7 | 4 | 1 | 21 | 2013 |
| 15,7 | 26,1 | 0,7 | 5 | 1 | 21 | 1999 |
| 13,5 | 16,6 | 0,7 | 5 | 1 | 26 | 1999 |
| 13,5 | 16,6 | 0,7 | 2 | 1 | 22 | 2000 |
| 17,9 | 38,7 | 0,7 | 4 | 1 | 21 | 2012 |
| 14,6 | 21   | 0,7 | 4 | 1 | 21 | 2006 |
| 15,2 | 23,7 | 0,7 | 5 | 1 | 23 | 2006 |
| 15,2 | 23,7 | 0,7 | 4 | 1 | 15 | 2015 |
| 12,6 | 13,5 | 0,7 | 2 | 1 | 25 | 2007 |
| 16,2 | 28,7 | 0,7 | 5 | 1 | 24 | 2002 |
| 16,2 | 28,7 | 0,7 | 5 | 1 | 24 | 2002 |
| 16,2 | 28,7 | 0,7 | 5 | 1 | 19 | 2012 |
| 16,2 | 28,7 | 0,7 | 4 | 1 | 22 | 2013 |
| 16,9 | 32,6 | 0,7 | 4 | 1 | 18 | 2012 |

|      |      |     |   |   |    |      |
|------|------|-----|---|---|----|------|
| 12,9 | 14,5 | 0,7 | 3 | 1 | 25 | 2007 |
| 14,8 | 21,9 | 0,7 | 5 | 1 | 21 | 2000 |
| 14,8 | 21,9 | 0,7 | 6 | 1 | 23 | 2008 |
| 15   | 22,8 | 0,7 | 3 | 1 | 23 | 2002 |
| 15   | 22,8 | 0,7 | 5 | 1 | 26 | 2006 |
| 15   | 22,8 | 0,7 | 5 | 1 | 19 | 2012 |
| 11,8 | 11,1 | 0,7 | 2 | 1 | 20 | 2002 |
| 16,4 | 29,8 | 0,7 | 6 | 1 | 23 | 2003 |
| 19,5 | 50,1 | 0,7 | 7 | 1 | 17 | 2012 |
| 15,3 | 24,2 | 0,7 | 5 | 1 | 21 | 2012 |
| 14,5 | 20,6 | 0,7 | 4 | 1 | 20 | 2011 |
| 13,6 | 17   | 0,7 | 3 | 1 | 19 | 2000 |
| 13,3 | 15,9 | 0,7 | 2 | 1 | 19 | 2013 |
| 13,3 | 15,9 | 0,7 | 2 | 1 | 18 | 2014 |
| 12,5 | 13,2 | 0,7 | 2 | 1 | 23 | 2002 |
| 12,5 | 13,2 | 0,7 | 3 | 1 | 21 | 2011 |
| 12,5 | 13,2 | 0,7 | 2 | 1 | 20 | 2013 |
| 17,1 | 33,8 | 0,7 | 6 | 1 | 20 | 2013 |
| 13,1 | 15,2 | 0,7 | 3 | 1 | 25 | 2004 |

|      |      |     |   |   |    |      |
|------|------|-----|---|---|----|------|
| 13,1 | 15,2 | 0,7 | 2 | 1 | 20 | 2008 |
| 13,1 | 15,2 | 0,7 | 3 | 1 | 18 | 2014 |
| 11,2 | 9,5  | 0,7 | 2 | 1 | 23 | 2006 |
| 15,4 | 24,7 | 0,7 | 4 | 1 | 25 | 2002 |
| 19   | 46,4 | 0,7 | 5 | 1 | 21 | 2012 |
| 14,4 | 20,2 | 0,7 | 3 | 1 | 19 | 2002 |
| 14,4 | 20,2 | 0,7 | 3 | 1 | 22 | 2003 |
| 14,4 | 20,2 | 0,7 | 4 | 1 | 24 | 2009 |
| 14,4 | 20,2 | 0,7 | 4 | 1 | 22 | 2015 |
| 11,9 | 11,4 | 0,7 | 2 | 1 | 25 | 2007 |
| 12,4 | 12,9 | 0,7 | 2 | 1 | 22 | 2009 |
| 12,4 | 12,9 | 0,7 | 3 | 1 | 23 | 2009 |
| 15,9 | 27,2 | 0,7 | 4 | 1 | 20 | 1999 |
| 15,9 | 27,2 | 0,7 | 4 | 1 | 24 | 2002 |
| 15,9 | 27,2 | 0,7 | 4 | 1 | 20 | 2013 |
| 13,7 | 17,4 | 0,7 | 2 | 1 | 22 | 1999 |
| 15,5 | 25,2 | 0,7 | 3 | 1 | 23 | 2002 |
| 16,5 | 30,4 | 0,7 | 5 | 1 | 18 | 2014 |
| 15,1 | 23,3 | 0,7 | 4 | 1 | 20 | 2006 |

|      |      |     |   |   |    |      |
|------|------|-----|---|---|----|------|
| 14,7 | 21,5 | 0,7 | 3 | 1 | 20 | 2003 |
| 15,6 | 25,7 | 0,7 | 4 | 1 | 18 | 2014 |
| 16,8 | 32,1 | 0,7 | 7 | 1 | 18 | 2001 |
| 15,7 | 26,2 | 0,7 | 5 | 1 | 26 | 2006 |
| 15,7 | 26,2 | 0,7 | 5 | 1 | 21 | 2013 |
| 12   | 11,7 | 0,7 | 2 | 1 | 23 | 2007 |
| 12   | 11,7 | 0,7 | 2 | 1 | 25 | 2007 |
| 12,3 | 12,6 | 0,7 | 2 | 1 | 19 | 2014 |
| 14,3 | 19,8 | 0,7 | 3 | 1 | 23 | 2003 |
| 12,8 | 14,2 | 0,7 | 2 | 1 | 20 | 2002 |
| 12,8 | 14,2 | 0,7 | 2 | 1 | 25 | 2007 |
| 12,8 | 14,2 | 0,7 | 2 | 1 | 20 | 2013 |
| 11,5 | 10,3 | 0,7 | 2 | 1 | 26 | 2001 |
| 11,5 | 10,3 | 0,7 | 1 | 1 | 26 | 2001 |
| 18   | 39,5 | 0,7 | 6 | 1 | 19 | 2008 |
| 13,8 | 17,8 | 0,7 | 3 | 1 | 23 | 1999 |
| 12,1 | 12   | 0,7 | 2 | 1 | 23 | 2005 |
| 12,1 | 12   | 0,7 | 2 | 1 | 25 | 2007 |
| 12,2 | 12,3 | 0,7 | 3 | 1 | 23 | 2005 |

|      |      |     |   |   |    |      |
|------|------|-----|---|---|----|------|
| 12,2 | 12,3 | 0,7 | 2 | 1 | 23 | 2009 |
| 16,2 | 28,8 | 0,7 | 7 | 1 | 19 | 2012 |
| 13,4 | 16,3 | 0,7 | 4 | 1 | 22 | 1999 |
| 13,4 | 16,3 | 0,7 | 2 | 1 | 22 | 2000 |
| 13,4 | 16,3 | 0,7 | 2 | 1 | 21 | 2000 |
| 13,4 | 16,3 | 0,7 | 2 | 1 | 24 | 2002 |
| 13,4 | 16,3 | 0,7 | 3 | 1 | 25 | 2007 |
| 16,9 | 32,7 | 0,7 | 5 | 1 | 20 | 2013 |
| 14,2 | 19,4 | 0,7 | 6 | 1 | 26 | 1999 |
| 14,2 | 19,4 | 0,7 | 3 | 1 | 23 | 2008 |
| 14,2 | 19,4 | 0,7 | 3 | 1 | 18 | 2012 |
| 15,2 | 23,8 | 0,7 | 7 | 1 | 26 | 2006 |
| 14,1 | 19   | 0,7 | 4 | 1 | 21 | 1999 |
| 14,1 | 19   | 0,7 | 3 | 1 | 26 | 2003 |
| 14,1 | 19   | 0,7 | 2 | 1 | 21 | 2012 |
| 17   | 33,3 | 0,7 | 5 | 1 | 18 | 2000 |
| 14   | 18,6 | 0,7 | 5 | 1 | 19 | 2012 |
| 14,6 | 21,1 | 0,7 | 6 | 1 | 25 | 1999 |
| 17,2 | 34,5 | 0,7 | 6 | 1 | 23 | 1999 |

|      |      |     |   |   |    |      |
|------|------|-----|---|---|----|------|
| 13   | 14,9 | 0,7 | 3 | 1 | 23 | 2003 |
| 13   | 14,9 | 0,7 | 3 | 1 | 18 | 2015 |
| 15,3 | 24,3 | 0,7 | 5 | 1 | 18 | 1999 |
| 15,3 | 24,3 | 0,7 | 4 | 1 | 22 | 2011 |
| 12,7 | 13,9 | 0,7 | 2 | 1 | 19 | 2000 |
| 12,7 | 13,9 | 0,7 | 3 | 1 | 25 | 2005 |
| 14,8 | 22   | 0,7 | 4 | 1 | 18 | 1999 |
| 21,6 | 68,4 | 0,7 | 7 | 1 | 18 | 2012 |
| 13,5 | 16,7 | 0,7 | 2 | 1 | 21 | 2000 |
| 13,5 | 16,7 | 0,7 | 3 | 1 | 25 | 2008 |
| 13,5 | 16,7 | 0,7 | 6 | 1 | 17 | 2014 |
| 18,3 | 41,6 | 0,7 | 6 | 1 | 19 | 2013 |
| 16,3 | 29,4 | 0,7 | 4 | 1 | 18 | 2000 |
| 14,5 | 20,7 | 0,7 | 5 | 1 | 27 | 1999 |
| 14,5 | 20,7 | 0,7 | 3 | 1 | 22 | 2000 |
| 14,5 | 20,7 | 0,7 | 8 | 1 | 23 | 2010 |
| 14,5 | 20,7 | 0,7 | 8 | 1 | 23 | 2010 |
| 18   | 39,6 | 0,7 | 5 | 1 | 18 | 2012 |
| 15,4 | 24,8 | 0,7 | 5 | 1 | 25 | 2003 |

|      |      |     |   |   |    |      |
|------|------|-----|---|---|----|------|
| 15,4 | 24,8 | 0,7 | 4 | 1 | 22 | 2011 |
| 17,5 | 36,4 | 0,7 | 9 | 1 | 20 | 2011 |
| 17,5 | 36,4 | 0,7 | 7 | 1 | 17 | 2012 |
| 15,5 | 25,3 | 0,7 | 5 | 1 | 26 | 1999 |
| 15,5 | 25,3 | 0,7 | 9 | 1 | 23 | 2006 |
| 15,8 | 26,8 | 0,7 | 6 | 1 | 23 | 2006 |
| 16,9 | 32,8 | 0,7 | 3 | 1 | 17 | 2012 |
| 15,6 | 25,8 | 0,7 | 5 | 1 | 22 | 2000 |
| 15,7 | 26,3 | 0,7 | 4 | 1 | 25 | 2004 |
| 15,1 | 23,4 | 0,7 | 5 | 1 | 20 | 2000 |
| 15,1 | 23,4 | 0,7 | 3 | 1 | 18 | 2012 |
| 13,6 | 17,1 | 0,7 | 2 | 1 | 21 | 2000 |
| 13,6 | 17,1 | 0,7 | 5 | 1 | 26 | 2005 |
| 17   | 33,4 | 0,7 | 6 | 1 | 19 | 2011 |
| 17,3 | 35,2 | 0,7 | 4 | 1 | 21 | 2013 |
| 14,4 | 20,3 | 0,7 | 5 | 1 | 26 | 1999 |
| 14,4 | 20,3 | 0,7 | 5 | 1 | 27 | 1999 |
| 14,4 | 20,3 | 0,7 | 3 | 1 | 27 | 1999 |
| 14,4 | 20,3 | 0,7 | 5 | 1 | 22 | 2000 |

|      |      |     |    |   |    |      |
|------|------|-----|----|---|----|------|
| 14,4 | 20,3 | 0,7 | 3  | 1 | 23 | 2003 |
| 12,6 | 13,6 | 0,7 | 2  | 1 | 25 | 1999 |
| 12,6 | 13,6 | 0,7 | 2  | 1 | 25 | 2007 |
| 17,1 | 34   | 0,7 | 4  | 1 | 18 | 2012 |
| 17,1 | 34   | 0,7 | 3  | 1 | 19 | 2012 |
| 17,2 | 34,6 | 0,7 | 7  | 1 | 18 | 2012 |
| 17,9 | 39   | 0,7 | 4  | 1 | 18 | 2012 |
| 20   | 54,4 | 0,7 | 10 | 1 | 18 | 2012 |
| 13,3 | 16   | 0,7 | 2  | 1 | 22 | 2000 |
| 13,3 | 16   | 0,7 | 3  | 1 | 23 | 2008 |
| 14,3 | 19,9 | 0,7 | 5  | 1 | 25 | 1999 |
| 14,3 | 19,9 | 0,7 | 5  | 1 | 26 | 2000 |
| 14,3 | 19,9 | 0,7 | 3  | 1 | 20 | 2003 |
| 14,3 | 19,9 | 0,7 | 5  | 1 | 17 | 2012 |
| 15,2 | 23,9 | 0,7 | 5  | 1 | 19 | 2012 |
| 15,2 | 23,9 | 0,7 | 5  | 1 | 20 | 2013 |
| 13,7 | 17,5 | 0,7 | 2  | 1 | 20 | 2000 |
| 13,7 | 17,5 | 0,7 | 3  | 1 | 21 | 2003 |
| 13,7 | 17,5 | 0,7 | 3  | 1 | 20 | 2008 |

|      |      |     |   |   |    |      |
|------|------|-----|---|---|----|------|
| 13,1 | 15,3 | 0,7 | 3 | 1 | 26 | 2005 |
| 18   | 39,7 | 0,7 | 6 | 1 | 20 | 2013 |
| 12,5 | 13,3 | 0,7 | 2 | 1 | 22 | 2002 |
| 14,2 | 19,5 | 0,7 | 3 | 1 | 22 | 2000 |
| 14,2 | 19,5 | 0,7 | 3 | 1 | 22 | 2001 |
| 14,2 | 19,5 | 0,7 | 4 | 1 | 23 | 2006 |
| 14,2 | 19,5 | 0,7 | 3 | 1 | 18 | 2008 |
| 14,2 | 19,5 | 0,7 | 3 | 1 | 18 | 2014 |
| 13,8 | 17,9 | 0,7 | 2 | 1 | 24 | 2002 |
| 13,8 | 17,9 | 0,7 | 4 | 1 | 20 | 2011 |
| 13,8 | 17,9 | 0,7 | 4 | 1 | 21 | 2012 |
| 16   | 27,9 | 0,7 | 5 | 1 | 20 | 1999 |
| 16   | 27,9 | 0,7 | 7 | 1 | 22 | 1999 |
| 16   | 27,9 | 0,7 | 5 | 1 | 22 | 2013 |
| 16,3 | 29,5 | 0,7 | 6 | 1 | 19 | 2013 |
| 14,1 | 19,1 | 0,7 | 2 | 1 | 21 | 2000 |
| 13,9 | 18,3 | 0,7 | 5 | 1 | 26 | 1999 |
| 15   | 23   | 0,7 | 4 | 1 | 27 | 1999 |
| 15   | 23   | 0,7 | 3 | 1 | 26 | 2000 |

|      |      |     |   |   |    |      |
|------|------|-----|---|---|----|------|
| 15   | 23   | 0,7 | 5 | 1 | 19 | 2012 |
| 15   | 23   | 0,7 | 3 | 1 | 20 | 2012 |
| 14   | 18,7 | 0,7 | 4 | 1 | 23 | 2006 |
| 14   | 18,7 | 0,7 | 3 | 1 | 25 | 2007 |
| 14   | 18,7 | 0,7 | 3 | 1 | 18 | 2015 |
| 13,4 | 16,4 | 0,7 | 2 | 1 | 24 | 2006 |
| 11,8 | 11,2 | 0,7 | 2 | 1 | 25 | 2004 |
| 11,8 | 11,2 | 0,7 | 2 | 1 | 19 | 2006 |
| 15,4 | 24,9 | 0,7 | 7 | 1 | 24 | 2001 |
| 15,4 | 24,9 | 0,7 | 3 | 1 | 22 | 2003 |
| 15,4 | 24,9 | 0,7 | 4 | 1 | 22 | 2004 |
| 17   | 33,5 | 0,7 | 6 | 1 | 23 | 2006 |
| 17   | 33,5 | 0,7 | 5 | 1 | 22 | 2013 |
| 12,8 | 14,3 | 0,7 | 2 | 1 | 22 | 2000 |
| 12,8 | 14,3 | 0,7 | 2 | 1 | 22 | 2000 |
| 12,8 | 14,3 | 0,7 | 2 | 1 | 26 | 2000 |
| 12,8 | 14,3 | 0,7 | 4 | 1 | 20 | 2004 |
| 18,3 | 41,8 | 0,7 | 6 | 1 | 19 | 2013 |
| 15,5 | 25,4 | 0,7 | 4 | 1 | 20 | 1999 |

|      |      |     |    |   |    |      |
|------|------|-----|----|---|----|------|
| 15,5 | 25,4 | 0,7 | 7  | 1 | 27 | 1999 |
| 15,5 | 25,4 | 0,7 | 6  | 1 | 22 | 2011 |
| 15,5 | 25,4 | 0,7 | 4  | 1 | 16 | 2015 |
| 15,7 | 26,4 | 0,7 | 4  | 1 | 20 | 1999 |
| 15,7 | 26,4 | 0,7 | 3  | 1 | 19 | 2000 |
| 15,7 | 26,4 | 0,7 | 7  | 1 | 20 | 2001 |
| 15,7 | 26,4 | 0,7 | 4  | 1 | 19 | 2011 |
| 14,5 | 20,8 | 0,7 | 4  | 1 | 21 | 2008 |
| 18   | 39,8 | 0,7 | 5  | 1 | 20 | 2013 |
| 12,3 | 12,7 | 0,7 | 2  | 1 | 24 | 2002 |
| 12,3 | 12,7 | 0,7 | 2  | 1 | 18 | 2014 |
| 20   | 54,6 | 0,7 | 6  | 1 | 22 | 2013 |
| 15,1 | 23,5 | 0,7 | 4  | 1 | 21 | 2001 |
| 13   | 15   | 0,7 | 2  | 1 | 27 | 1999 |
| 13   | 15   | 0,7 | 5  | 1 | 25 | 2007 |
| 13   | 15   | 0,7 | 2  | 1 | 19 | 2013 |
| 23   | 83,1 | 0,7 | 10 | 1 | 18 | 2012 |
| 12,1 | 12,1 | 0,7 | 4  | 1 | 23 | 2005 |
| 12,1 | 12,1 | 0,7 | 2  | 1 | 17 | 2014 |

|      |      |     |   |   |    |      |
|------|------|-----|---|---|----|------|
| 14,7 | 21,7 | 0,7 | 3 | 1 | 19 | 2011 |
| 14,4 | 20,4 | 0,7 | 2 | 1 | 27 | 1999 |
| 14,4 | 20,4 | 0,7 | 6 | 1 | 23 | 2008 |
| 17,4 | 36   | 0,7 | 5 | 1 | 18 | 2014 |
| 15,2 | 24   | 0,7 | 3 | 1 | 19 | 2012 |
| 16,5 | 30,7 | 0,7 | 5 | 1 | 21 | 2000 |
| 12,7 | 14   | 0,7 | 2 | 1 | 22 | 2002 |
| 12,7 | 14   | 0,7 | 3 | 1 | 25 | 2004 |
| 16,3 | 29,6 | 0,7 | 6 | 1 | 19 | 2014 |
| 16   | 28   | 0,7 | 7 | 1 | 19 | 2009 |
| 11   | 9,1  | 0,7 | 1 | 1 | 25 | 2007 |
| 13,6 | 17,2 | 0,7 | 3 | 1 | 17 | 2014 |
| 17,2 | 34,8 | 0,7 | 6 | 1 | 22 | 2013 |
| 14,3 | 20   | 0,7 | 3 | 1 | 23 | 2003 |
| 14,3 | 20   | 0,7 | 6 | 1 | 17 | 2008 |
| 14,3 | 20   | 0,7 | 3 | 1 | 21 | 2015 |
| 15,3 | 24,5 | 0,7 | 4 | 1 | 26 | 1999 |
| 15,3 | 24,5 | 0,7 | 5 | 1 | 26 | 2000 |
| 13,3 | 16,1 | 0,7 | 3 | 1 | 19 | 2009 |

|      |      |     |   |   |    |      |
|------|------|-----|---|---|----|------|
| 13,3 | 16,1 | 0,7 | 2 | 1 | 21 | 2013 |
| 13,3 | 16,1 | 0,7 | 2 | 1 | 22 | 2013 |
| 14,6 | 21,3 | 0,7 | 8 | 1 | 17 | 2009 |
| 14,6 | 21,3 | 0,7 | 4 | 1 | 19 | 2012 |
| 14,6 | 21,3 | 0,7 | 3 | 1 | 16 | 2015 |
| 15   | 23,1 | 0,7 | 3 | 1 | 19 | 2012 |
| 16,2 | 29,1 | 0,7 | 7 | 1 | 21 | 1999 |
| 16,2 | 29,1 | 0,7 | 6 | 1 | 18 | 2000 |
| 16,2 | 29,1 | 0,7 | 4 | 1 | 20 | 2007 |
| 15,4 | 25   | 0,7 | 5 | 1 | 22 | 2013 |
| 10,4 | 7,7  | 0,7 | 1 | 1 | 26 | 2009 |
| 14,2 | 19,6 | 0,7 | 4 | 1 | 21 | 1999 |
| 14,2 | 19,6 | 0,7 | 5 | 1 | 25 | 1999 |
| 14,2 | 19,6 | 0,7 | 3 | 1 | 21 | 2008 |
| 14,2 | 19,6 | 0,7 | 3 | 1 | 20 | 2011 |
| 14,2 | 19,6 | 0,7 | 2 | 1 | 20 | 2013 |
| 14,2 | 19,6 | 0,7 | 3 | 1 | 18 | 2014 |
| 15,8 | 27   | 0,7 | 6 | 1 | 21 | 1999 |
| 15,8 | 27   | 0,7 | 4 | 1 | 20 | 2011 |

|      |      |     |    |   |    |      |
|------|------|-----|----|---|----|------|
| 16,4 | 30,2 | 0,7 | 5  | 1 | 18 | 1999 |
| 16,4 | 30,2 | 0,7 | 7  | 1 | 20 | 1999 |
| 16,4 | 30,2 | 0,7 | 8  | 1 | 19 | 2015 |
| 15,7 | 26,5 | 0,7 | 5  | 1 | 22 | 1999 |
| 15,7 | 26,5 | 0,7 | 4  | 1 | 22 | 2011 |
| 12,9 | 14,7 | 0,7 | 3  | 1 | 21 | 2011 |
| 14,8 | 22,2 | 0,7 | 3  | 1 | 26 | 2003 |
| 12,6 | 13,7 | 0,7 | 2  | 1 | 25 | 2008 |
| 13,8 | 18   | 0,7 | 3  | 1 | 22 | 2005 |
| 16,7 | 31,9 | 0,7 | 5  | 1 | 18 | 2000 |
| 14,1 | 19,2 | 0,7 | 3  | 1 | 23 | 2006 |
| 14,1 | 19,2 | 0,7 | 5  | 1 | 25 | 2007 |
| 13,1 | 15,4 | 0,7 | 3  | 1 | 25 | 2005 |
| 13,1 | 15,4 | 0,7 | 3  | 1 | 25 | 2007 |
| 19,5 | 50,8 | 0,7 | 5  | 1 | 19 | 2012 |
| 13,9 | 18,4 | 0,7 | 4  | 1 | 21 | 1999 |
| 13,9 | 18,4 | 0,7 | 3  | 1 | 21 | 2012 |
| 14   | 18,8 | 0,7 | 3  | 1 | 20 | 2012 |
| 19,2 | 48,5 | 0,7 | 10 | 1 | 20 | 2013 |

|      |      |     |   |   |    |      |
|------|------|-----|---|---|----|------|
| 11,6 | 10,7 | 0,7 | 2 | 1 | 22 | 2007 |
| 14,5 | 20,9 | 0,7 | 3 | 1 | 27 | 1999 |
| 16,3 | 29,7 | 0,7 | 5 | 1 | 20 | 2003 |
| 17,1 | 34,3 | 0,7 | 7 | 1 | 21 | 2012 |
| 12,5 | 13,4 | 0,7 | 2 | 1 | 23 | 2002 |
| 12,5 | 13,4 | 0,7 | 2 | 1 | 25 | 2005 |
| 12,5 | 13,4 | 0,7 | 2 | 1 | 20 | 2013 |
| 19,4 | 50,1 | 0,7 | 8 | 1 | 18 | 2012 |
| 15,2 | 24,1 | 0,7 | 5 | 1 | 23 | 2006 |
| 14,7 | 21,8 | 0,7 | 3 | 1 | 27 | 1999 |
| 14,7 | 21,8 | 0,7 | 3 | 1 | 23 | 2002 |
| 14,7 | 21,8 | 0,7 | 3 | 1 | 15 | 2015 |
| 16,6 | 31,4 | 0,7 | 7 | 1 | 19 | 2012 |
| 15,9 | 27,6 | 0,7 | 3 | 1 | 22 | 2001 |
| 12,8 | 14,4 | 0,7 | 5 | 1 | 25 | 1999 |
| 12,8 | 14,4 | 0,7 | 4 | 1 | 23 | 2006 |
| 12,8 | 14,4 | 0,7 | 3 | 1 | 21 | 2008 |
| 19   | 47,1 | 0,7 | 5 | 1 | 18 | 2012 |
| 16,2 | 29,2 | 0,7 | 6 | 1 | 23 | 2005 |

|      |      |     |   |   |    |      |
|------|------|-----|---|---|----|------|
| 16,2 | 29,2 | 0,7 | 6 | 1 | 19 | 2012 |
| 16,2 | 29,2 | 0,7 | 4 | 1 | 19 | 2013 |
| 15,3 | 24,6 | 0,7 | 6 | 1 | 20 | 2013 |
| 13,5 | 16,9 | 0,7 | 3 | 1 | 23 | 2008 |
| 13,2 | 15,8 | 0,7 | 2 | 1 | 21 | 2008 |
| 13,2 | 15,8 | 0,7 | 2 | 1 | 21 | 2014 |
| 12,4 | 13,1 | 0,7 | 3 | 1 | 21 | 2005 |
| 15,7 | 26,6 | 0,7 | 5 | 1 | 22 | 1999 |
| 15,7 | 26,6 | 0,7 | 3 | 1 | 18 | 2001 |
| 15,7 | 26,6 | 0,7 | 6 | 1 | 20 | 2013 |
| 14,3 | 20,1 | 0,7 | 3 | 1 | 23 | 1999 |
| 14,3 | 20,1 | 0,7 | 3 | 1 | 20 | 2008 |
| 14,3 | 20,1 | 0,7 | 3 | 1 | 21 | 2015 |
| 15   | 23,2 | 0,7 | 5 | 1 | 21 | 2000 |
| 15,5 | 25,6 | 0,7 | 5 | 1 | 20 | 2009 |
| 18   | 40,1 | 0,7 | 4 | 1 | 21 | 2012 |
| 14,6 | 21,4 | 0,7 | 3 | 1 | 26 | 2000 |
| 14,6 | 21,4 | 0,7 | 4 | 1 | 23 | 2008 |
| 13,6 | 17,3 | 0,7 | 2 | 1 | 21 | 2000 |

|      |      |     |    |   |    |      |
|------|------|-----|----|---|----|------|
| 11,8 | 11,3 | 0,7 | 1  | 1 | 26 | 2001 |
| 17,2 | 35   | 0,7 | 6  | 1 | 22 | 2013 |
| 20,8 | 61,9 | 0,7 | 5  | 1 | 18 | 2012 |
| 16,5 | 30,9 | 0,7 | 7  | 1 | 23 | 2001 |
| 16,5 | 30,9 | 0,7 | 5  | 1 | 19 | 2012 |
| 14,8 | 22,3 | 0,7 | 10 | 1 | 26 | 2006 |
| 14,2 | 19,7 | 0,7 | 3  | 1 | 27 | 1999 |
| 16,3 | 29,8 | 0,7 | 4  | 1 | 18 | 1999 |
| 19   | 47,2 | 0,7 | 6  | 1 | 20 | 2013 |
| 13,7 | 17,7 | 0,7 | 3  | 1 | 26 | 2000 |
| 15,1 | 23,7 | 0,7 | 5  | 1 | 19 | 2013 |
| 12,2 | 12,5 | 0,7 | 2  | 1 | 25 | 2007 |
| 16   | 28,2 | 0,7 | 6  | 1 | 19 | 2011 |
| 14,1 | 19,3 | 0,7 | 5  | 1 | 23 | 2007 |
| 13,3 | 16,2 | 0,7 | 2  | 1 | 24 | 2002 |
| 16,6 | 31,5 | 0,7 | 8  | 1 | 23 | 2008 |
| 16,6 | 31,5 | 0,7 | 5  | 1 | 20 | 2013 |
| 12,1 | 12,2 | 0,7 | 2  | 1 | 22 | 2007 |
| 12,1 | 12,2 | 0,7 | 2  | 1 | 25 | 2007 |

|      |      |     |    |   |    |      |
|------|------|-----|----|---|----|------|
| 13,8 | 18,1 | 0,7 | 4  | 1 | 23 | 2008 |
| 14   | 18,9 | 0,7 | 2  | 1 | 19 | 2001 |
| 14   | 18,9 | 0,7 | 3  | 1 | 26 | 2003 |
| 14   | 18,9 | 0,7 | 5  | 1 | 26 | 2005 |
| 14   | 18,9 | 0,7 | 4  | 1 | 21 | 2011 |
| 14,5 | 21   | 0,7 | 3  | 1 | 27 | 1999 |
| 13,9 | 18,5 | 0,7 | 2  | 1 | 24 | 2002 |
| 13,9 | 18,5 | 0,7 | 3  | 1 | 21 | 2011 |
| 17,4 | 36,3 | 0,7 | 10 | 1 | 21 | 2012 |
| 15,2 | 24,2 | 0,7 | 4  | 1 | 24 | 2002 |
| 16,7 | 32,1 | 0,7 | 5  | 1 | 22 | 2003 |
| 16,7 | 32,1 | 0,7 | 6  | 1 | 20 | 2011 |
| 13,1 | 15,5 | 0,7 | 3  | 1 | 19 | 2000 |
| 13,1 | 15,5 | 0,7 | 3  | 1 | 21 | 2000 |
| 13,1 | 15,5 | 0,7 | 4  | 1 | 23 | 2005 |
| 13,1 | 15,5 | 0,7 | 3  | 1 | 25 | 2007 |
| 13,1 | 15,5 | 0,7 | 4  | 1 | 20 | 2011 |
| 15,3 | 24,7 | 0,7 | 4  | 1 | 27 | 1999 |
| 15,3 | 24,7 | 0,7 | 3  | 1 | 20 | 2003 |

|      |      |     |   |   |    |      |
|------|------|-----|---|---|----|------|
| 12,6 | 13,8 | 0,7 | 2 | 1 | 22 | 2002 |
| 14,4 | 20,6 | 0,7 | 2 | 1 | 26 | 2000 |
| 13,4 | 16,6 | 0,7 | 4 | 1 | 22 | 2001 |
| 15,7 | 26,7 | 0,7 | 5 | 1 | 19 | 2000 |
| 17,1 | 34,5 | 0,7 | 6 | 1 | 22 | 2013 |
| 20   | 55,2 | 0,7 | 6 | 1 | 19 | 2010 |
| 20   | 55,2 | 0,7 | 6 | 1 | 19 | 2010 |
| 17   | 33,9 | 0,7 | 5 | 1 | 22 | 2013 |
| 16,1 | 28,8 | 0,7 | 6 | 1 | 20 | 2013 |
| 15,6 | 26,2 | 0,7 | 3 | 1 | 20 | 2003 |
| 15   | 23,3 | 0,7 | 5 | 1 | 25 | 1999 |
| 15   | 23,3 | 0,7 | 5 | 1 | 27 | 1999 |
| 15   | 23,3 | 0,7 | 4 | 1 | 21 | 2012 |
| 16,3 | 29,9 | 0,7 | 5 | 1 | 21 | 2000 |
| 17,9 | 39,6 | 0,7 | 9 | 1 | 20 | 2011 |
| 14,3 | 20,2 | 0,7 | 4 | 1 | 21 | 1999 |
| 14,3 | 20,2 | 0,7 | 4 | 1 | 25 | 1999 |
| 14,3 | 20,2 | 0,7 | 3 | 1 | 21 | 2000 |
| 14,3 | 20,2 | 0,7 | 5 | 1 | 26 | 2000 |

|      |      |     |   |   |    |      |
|------|------|-----|---|---|----|------|
| 14,3 | 20,2 | 0,7 | 4 | 1 | 24 | 2006 |
| 14,3 | 20,2 | 0,7 | 6 | 1 | 18 | 2008 |
| 14,3 | 20,2 | 0,7 | 4 | 1 | 19 | 2008 |
| 14,3 | 20,2 | 0,7 | 4 | 1 | 20 | 2009 |
| 14,6 | 21,5 | 0,7 | 4 | 1 | 22 | 2011 |
| 16   | 28,3 | 0,7 | 6 | 1 | 19 | 2000 |
| 16   | 28,3 | 0,7 | 6 | 1 | 20 | 2013 |
| 13,5 | 17   | 0,7 | 2 | 1 | 22 | 2000 |
| 13,5 | 17   | 0,7 | 4 | 1 | 18 | 2012 |
| 19   | 47,4 | 0,7 | 6 | 1 | 18 | 2012 |
| 11   | 9,2  | 0,7 | 2 | 1 | 25 | 2007 |
| 15,1 | 23,8 | 0,7 | 7 | 1 | 18 | 1999 |
| 15,1 | 23,8 | 0,7 | 2 | 1 | 26 | 2000 |
| 13,2 | 15,9 | 0,7 | 3 | 1 | 23 | 2008 |
| 14,2 | 19,8 | 0,7 | 5 | 1 | 19 | 2012 |
| 17,6 | 37,7 | 0,7 | 5 | 1 | 17 | 2012 |
| 13,6 | 17,4 | 0,7 | 2 | 1 | 27 | 1999 |
| 13,6 | 17,4 | 0,7 | 3 | 1 | 23 | 2008 |
| 13   | 15,2 | 0,7 | 2 | 1 | 23 | 1999 |

|      |      |     |   |   |    |      |
|------|------|-----|---|---|----|------|
| 13   | 15,2 | 0,7 | 2 | 1 | 25 | 2002 |
| 13   | 15,2 | 0,7 | 3 | 1 | 21 | 2011 |
| 14,1 | 19,4 | 0,7 | 4 | 1 | 26 | 1999 |
| 14,1 | 19,4 | 0,7 | 4 | 1 | 24 | 2006 |
| 14,5 | 21,1 | 0,7 | 5 | 1 | 21 | 2000 |
| 14,5 | 21,1 | 0,7 | 4 | 1 | 17 | 2012 |
| 14,5 | 21,1 | 0,7 | 3 | 1 | 22 | 2015 |
| 15,8 | 27,3 | 0,7 | 4 | 1 | 19 | 2012 |
| 13,7 | 17,8 | 0,7 | 3 | 1 | 22 | 1999 |
| 13,7 | 17,8 | 0,7 | 2 | 1 | 26 | 2000 |
| 12,4 | 13,2 | 0,7 | 2 | 1 | 25 | 2008 |
| 14   | 19   | 0,7 | 2 | 1 | 27 | 1999 |
| 15,3 | 24,8 | 0,7 | 4 | 1 | 18 | 1999 |
| 15,3 | 24,8 | 0,7 | 3 | 1 | 19 | 2012 |
| 13,8 | 18,2 | 0,7 | 3 | 1 | 25 | 2008 |
| 15,5 | 25,8 | 0,7 | 6 | 1 | 18 | 2001 |
| 15,5 | 25,8 | 0,7 | 6 | 1 | 18 | 2008 |
| 15,5 | 25,8 | 0,7 | 4 | 1 | 20 | 2013 |
| 11,3 | 10   | 0,7 | 2 | 1 | 23 | 2004 |

|      |      |     |   |   |    |      |
|------|------|-----|---|---|----|------|
| 11,3 | 10   | 0,7 | 2 | 1 | 23 | 2004 |
| 11,3 | 10   | 0,7 | 2 | 1 | 23 | 2007 |
| 12,3 | 12,9 | 0,7 | 2 | 1 | 23 | 2009 |
| 12,7 | 14,2 | 0,7 | 2 | 1 | 22 | 2000 |
| 12,7 | 14,2 | 0,7 | 2 | 1 | 23 | 2002 |
| 12,7 | 14,2 | 0,7 | 2 | 1 | 19 | 2006 |
| 14,4 | 20,7 | 0,7 | 3 | 1 | 20 | 2000 |
| 14,4 | 20,7 | 0,7 | 3 | 1 | 22 | 2003 |
| 15   | 23,4 | 0,7 | 3 | 1 | 17 | 2008 |
| 10,4 | 7,8  | 0,7 | 2 | 1 | 23 | 2004 |
| 18,4 | 43,2 | 0,7 | 8 | 1 | 22 | 2013 |
| 17,2 | 35,3 | 0,7 | 6 | 1 | 19 | 2013 |
| 11,8 | 11,4 | 0,7 | 1 | 1 | 26 | 2001 |
| 11,8 | 11,4 | 0,7 | 2 | 1 | 19 | 2014 |
| 16,2 | 29,5 | 0,7 | 8 | 1 | 19 | 2012 |
| 12,2 | 12,6 | 0,7 | 2 | 1 | 17 | 2014 |
| 13,1 | 15,6 | 0,7 | 4 | 1 | 24 | 2006 |
| 13,1 | 15,6 | 0,7 | 5 | 1 | 25 | 2007 |
| 14,8 | 22,5 | 0,7 | 4 | 1 | 27 | 1999 |

|      |      |     |   |   |    |      |
|------|------|-----|---|---|----|------|
| 14,8 | 22,5 | 0,7 | 8 | 1 | 20 | 2010 |
| 14,8 | 22,5 | 0,7 | 8 | 1 | 20 | 2010 |
| 13,4 | 16,7 | 0,7 | 2 | 1 | 21 | 2000 |
| 13,4 | 16,7 | 0,7 | 3 | 1 | 22 | 2004 |
| 17,5 | 37,2 | 0,7 | 6 | 1 | 19 | 2013 |
| 15,1 | 23,9 | 0,7 | 4 | 1 | 19 | 2009 |
| 14,3 | 20,3 | 0,7 | 3 | 1 | 24 | 2002 |
| 12,1 | 12,3 | 0,7 | 3 | 1 | 23 | 2005 |
| 12,1 | 12,3 | 0,7 | 2 | 1 | 19 | 2006 |
| 12   | 12   | 0,7 | 3 | 1 | 25 | 2005 |
| 16,5 | 31,2 | 0,7 | 5 | 1 | 18 | 2001 |
| 15,8 | 27,4 | 0,7 | 4 | 1 | 24 | 2002 |
| 12,6 | 13,9 | 0,7 | 4 | 1 | 25 | 2005 |
| 12,6 | 13,9 | 0,7 | 3 | 1 | 26 | 2005 |
| 12,6 | 13,9 | 0,7 | 2 | 1 | 24 | 2009 |
| 16,1 | 29   | 0,7 | 6 | 1 | 20 | 2011 |
| 16,1 | 29   | 0,7 | 6 | 1 | 19 | 2012 |
| 13,5 | 17,1 | 0,7 | 2 | 1 | 26 | 1999 |
| 13,5 | 17,1 | 0,7 | 3 | 1 | 25 | 2003 |

|      |      |     |    |   |    |      |
|------|------|-----|----|---|----|------|
| 15,7 | 26,9 | 0,7 | 3  | 1 | 19 | 2013 |
| 16,6 | 31,8 | 0,7 | 8  | 1 | 22 | 2007 |
| 14,5 | 21,2 | 0,7 | 4  | 1 | 23 | 2003 |
| 14,5 | 21,2 | 0,7 | 3  | 1 | 19 | 2013 |
| 14,5 | 21,2 | 0,7 | 3  | 1 | 20 | 2013 |
| 19   | 47,7 | 0,7 | 6  | 1 | 19 | 2013 |
| 15,4 | 25,4 | 0,7 | 5  | 1 | 19 | 2000 |
| 15,5 | 25,9 | 0,7 | 5  | 1 | 20 | 1999 |
| 14,1 | 19,5 | 0,7 | 4  | 1 | 19 | 2006 |
| 16,7 | 32,4 | 0,7 | 5  | 1 | 19 | 2012 |
| 13,6 | 17,5 | 0,7 | 2  | 1 | 22 | 2000 |
| 16   | 28,5 | 0,7 | 5  | 1 | 22 | 2003 |
| 16   | 28,5 | 0,7 | 10 | 1 | 20 | 2007 |
| 16   | 28,5 | 0,7 | 5  | 1 | 21 | 2013 |
| 16,4 | 30,7 | 0,7 | 5  | 1 | 18 | 1999 |
| 14   | 19,1 | 0,7 | 4  | 1 | 23 | 2008 |
| 13,7 | 17,9 | 0,7 | 5  | 1 | 26 | 1999 |
| 16,2 | 29,6 | 0,7 | 4  | 1 | 20 | 2001 |
| 15   | 23,5 | 0,7 | 10 | 1 | 21 | 2003 |

|      |      |     |   |   |    |      |
|------|------|-----|---|---|----|------|
| 15   | 23,5 | 0,7 | 5 | 1 | 19 | 2013 |
| 13,9 | 18,7 | 0,7 | 3 | 1 | 20 | 1999 |
| 12,5 | 13,6 | 0,7 | 2 | 1 | 25 | 2007 |
| 12,5 | 13,6 | 0,7 | 3 | 1 | 20 | 2011 |
| 12,5 | 13,6 | 0,7 | 2 | 1 | 19 | 2013 |
| 13,8 | 18,3 | 0,7 | 3 | 1 | 25 | 2008 |
| 13,8 | 18,3 | 0,7 | 4 | 1 | 22 | 2011 |
| 13   | 15,3 | 0,7 | 2 | 1 | 25 | 2002 |
| 13   | 15,3 | 0,7 | 2 | 1 | 23 | 2002 |
| 10,6 | 8,3  | 0,7 | 2 | 1 | 25 | 2004 |
| 10,6 | 8,3  | 0,7 | 2 | 1 | 25 | 2004 |
| 15,1 | 24   | 0,7 | 3 | 1 | 15 | 2015 |
| 17,3 | 36,1 | 0,7 | 6 | 1 | 20 | 2013 |
| 14,6 | 21,7 | 0,7 | 4 | 1 | 21 | 2012 |
| 16,1 | 29,1 | 0,7 | 8 | 1 | 20 | 2007 |
| 16,6 | 31,9 | 0,7 | 5 | 1 | 19 | 2012 |
| 12,4 | 13,3 | 0,7 | 2 | 1 | 21 | 2006 |
| 12,4 | 13,3 | 0,7 | 2 | 1 | 25 | 2007 |
| 14,3 | 20,4 | 0,7 | 5 | 1 | 23 | 2007 |

|      |      |     |   |   |    |      |
|------|------|-----|---|---|----|------|
| 15,2 | 24,5 | 0,7 | 6 | 1 | 18 | 2000 |
| 17,7 | 38,7 | 0,7 | 4 | 1 | 21 | 2015 |
| 17,1 | 34,9 | 0,7 | 9 | 1 | 22 | 1999 |
| 15,3 | 25   | 0,7 | 5 | 1 | 18 | 2000 |
| 12,7 | 14,3 | 0,7 | 2 | 1 | 20 | 2002 |
| 15,4 | 25,5 | 0,7 | 5 | 1 | 22 | 1999 |
| 15,5 | 26   | 0,7 | 7 | 1 | 21 | 1999 |
| 15,5 | 26   | 0,7 | 5 | 1 | 22 | 1999 |
| 15,5 | 26   | 0,7 | 4 | 1 | 20 | 2013 |
| 13,4 | 16,8 | 0,7 | 2 | 1 | 26 | 2000 |
| 13,4 | 16,8 | 0,7 | 3 | 1 | 22 | 2002 |
| 13,4 | 16,8 | 0,7 | 2 | 1 | 23 | 2002 |
| 13,4 | 16,8 | 0,7 | 2 | 1 | 20 | 2013 |
| 16,4 | 30,8 | 0,7 | 8 | 1 | 25 | 2005 |
| 13,1 | 15,7 | 0,7 | 2 | 1 | 21 | 2000 |
| 13,1 | 15,7 | 0,7 | 3 | 1 | 19 | 2014 |
| 14,2 | 20   | 0,7 | 3 | 1 | 18 | 2012 |
| 16,2 | 29,7 | 0,7 | 4 | 1 | 15 | 2015 |
| 12,3 | 13   | 0,7 | 2 | 1 | 25 | 2007 |

|      |      |     |   |   |    |      |
|------|------|-----|---|---|----|------|
| 14,5 | 21,3 | 0,7 | 5 | 1 | 27 | 1999 |
| 14,5 | 21,3 | 0,7 | 4 | 1 | 21 | 2012 |
| 14,5 | 21,3 | 0,7 | 4 | 1 | 23 | 2015 |
| 11   | 9,3  | 0,7 | 2 | 1 | 25 | 2004 |
| 17,6 | 38,1 | 0,7 | 6 | 1 | 21 | 2013 |
| 18,7 | 45,7 | 0,7 | 8 | 1 | 19 | 2013 |
| 14,7 | 22,2 | 0,7 | 5 | 1 | 22 | 1999 |
| 13,5 | 17,2 | 0,7 | 4 | 1 | 22 | 1999 |
| 17,9 | 40,1 | 0,7 | 6 | 1 | 21 | 2013 |
| 11,7 | 11,2 | 0,7 | 2 | 1 | 23 | 2004 |
| 12,2 | 12,7 | 0,7 | 2 | 1 | 23 | 2008 |
| 16,3 | 30,3 | 0,7 | 3 | 1 | 18 | 2012 |
| 16,3 | 30,3 | 0,7 | 4 | 1 | 18 | 2012 |
| 17,5 | 37,5 | 0,7 | 6 | 1 | 20 | 2003 |
| 10,5 | 8,1  | 0,7 | 1 | 1 | 22 | 2007 |
| 14   | 19,2 | 0,7 | 3 | 1 | 18 | 2008 |
| 12,6 | 14   | 0,7 | 2 | 1 | 25 | 1999 |
| 12,6 | 14   | 0,7 | 2 | 1 | 23 | 2002 |
| 12,1 | 12,4 | 0,7 | 2 | 1 | 23 | 2007 |

|      |      |     |   |   |    |      |
|------|------|-----|---|---|----|------|
| 15,1 | 24,1 | 0,7 | 5 | 1 | 23 | 1999 |
| 15,1 | 24,1 | 0,7 | 4 | 1 | 21 | 2000 |
| 15,1 | 24,1 | 0,7 | 3 | 1 | 19 | 2012 |
| 13,2 | 16,1 | 0,7 | 3 | 1 | 20 | 2002 |
| 13,2 | 16,1 | 0,7 | 2 | 1 | 24 | 2002 |
| 13,2 | 16,1 | 0,7 | 3 | 1 | 25 | 2007 |
| 13,7 | 18   | 0,7 | 2 | 1 | 27 | 1999 |
| 11,9 | 11,8 | 0,7 | 3 | 1 | 23 | 2005 |
| 12   | 12,1 | 0,7 | 2 | 1 | 25 | 2007 |
| 16,9 | 33,8 | 0,7 | 7 | 1 | 22 | 1999 |
| 17,4 | 36,9 | 0,7 | 6 | 1 | 20 | 2013 |
| 14,6 | 21,8 | 0,7 | 3 | 1 | 15 | 2015 |
| 16,4 | 30,9 | 0,7 | 6 | 1 | 23 | 2006 |
| 16   | 28,7 | 0,7 | 5 | 1 | 19 | 2012 |
| 15,3 | 25,1 | 0,7 | 4 | 1 | 20 | 2006 |
| 15,4 | 25,6 | 0,7 | 4 | 1 | 23 | 2003 |
| 13   | 15,4 | 0,7 | 2 | 1 | 24 | 2002 |
| 13   | 15,4 | 0,7 | 2 | 1 | 22 | 2013 |
| 17,3 | 36,3 | 0,7 | 5 | 1 | 19 | 2013 |

|      |      |     |    |   |    |      |
|------|------|-----|----|---|----|------|
| 16,5 | 31,5 | 0,7 | 6  | 1 | 21 | 1999 |
| 16,5 | 31,5 | 0,7 | 6  | 1 | 19 | 2011 |
| 13,3 | 16,5 | 0,7 | 3  | 1 | 21 | 2000 |
| 18,3 | 43   | 0,7 | 6  | 1 | 19 | 2013 |
| 11,1 | 9,6  | 0,7 | 2  | 1 | 21 | 2014 |
| 14,5 | 21,4 | 0,7 | 5  | 1 | 20 | 2007 |
| 14,2 | 20,1 | 0,7 | 4  | 1 | 23 | 2006 |
| 14,2 | 20,1 | 0,7 | 3  | 1 | 19 | 2013 |
| 14,7 | 22,3 | 0,7 | 5  | 1 | 27 | 1999 |
| 14,7 | 22,3 | 0,7 | 3  | 1 | 22 | 2003 |
| 16,7 | 32,7 | 0,7 | 4  | 1 | 20 | 2003 |
| 17   | 34,5 | 0,7 | 7  | 1 | 23 | 2002 |
| 20   | 56,2 | 0,7 | 10 | 1 | 21 | 2013 |
| 21,3 | 67,9 | 0,7 | 6  | 1 | 20 | 2013 |
| 12,4 | 13,4 | 0,7 | 3  | 1 | 20 | 2000 |
| 12,4 | 13,4 | 0,7 | 4  | 1 | 19 | 2006 |
| 13,1 | 15,8 | 0,7 | 5  | 1 | 25 | 2007 |
| 12,7 | 14,4 | 0,7 | 2  | 1 | 19 | 2013 |
| 13,5 | 17,3 | 0,7 | 2  | 1 | 21 | 2000 |

|      |      |     |   |   |    |      |
|------|------|-----|---|---|----|------|
| 13,5 | 17,3 | 0,7 | 4 | 1 | 22 | 2005 |
| 13,5 | 17,3 | 0,7 | 4 | 1 | 24 | 2009 |
| 16,2 | 29,9 | 0,7 | 5 | 1 | 20 | 2003 |
| 16,2 | 29,9 | 0,7 | 7 | 1 | 19 | 2012 |
| 15,6 | 26,7 | 0,7 | 6 | 1 | 24 | 2006 |
| 15,6 | 26,7 | 0,7 | 3 | 1 | 16 | 2008 |
| 17,7 | 39   | 0,7 | 5 | 1 | 19 | 2000 |
| 14,8 | 22,8 | 0,7 | 4 | 1 | 22 | 2011 |
| 15,2 | 24,7 | 0,7 | 5 | 1 | 19 | 2012 |
| 17,5 | 37,7 | 0,7 | 6 | 1 | 18 | 2000 |
| 15,3 | 25,2 | 0,7 | 5 | 1 | 27 | 1999 |
| 13,6 | 17,7 | 0,7 | 2 | 1 | 27 | 1999 |
| 15,4 | 25,7 | 0,7 | 5 | 1 | 24 | 2001 |
| 15,4 | 25,7 | 0,7 | 5 | 1 | 24 | 2002 |
| 13,9 | 18,9 | 0,7 | 5 | 1 | 23 | 1999 |
| 12,3 | 13,1 | 0,7 | 2 | 1 | 25 | 2007 |
| 18,6 | 45,3 | 0,7 | 5 | 1 | 18 | 2012 |
| 15,9 | 28,3 | 0,7 | 5 | 1 | 19 | 2000 |
| 16,7 | 32,8 | 0,7 | 5 | 1 | 22 | 2001 |

|      |       |     |    |   |    |      |
|------|-------|-----|----|---|----|------|
| 17   | 34,6  | 0,7 | 10 | 1 | 19 | 2007 |
| 17   | 34,6  | 0,7 | 8  | 1 | 22 | 2011 |
| 13,2 | 16,2  | 0,7 | 2  | 1 | 24 | 2002 |
| 13,2 | 16,2  | 0,7 | 3  | 1 | 15 | 2015 |
| 14,3 | 20,6  | 0,7 | 3  | 1 | 23 | 2003 |
| 14,3 | 20,6  | 0,7 | 4  | 1 | 25 | 2005 |
| 14,3 | 20,6  | 0,7 | 3  | 1 | 25 | 2008 |
| 10,3 | 7,7   | 0,7 | 1  | 1 | 22 | 2007 |
| 12,2 | 12,8  | 0,7 | 2  | 1 | 17 | 2014 |
| 18,7 | 46,1  | 0,7 | 4  | 1 | 19 | 2012 |
| 19   | 48,36 | 0,7 | 8  | 1 | 20 | 2013 |
| 14,7 | 22,4  | 0,7 | 4  | 1 | 20 | 1999 |
| 15   | 23,8  | 0,7 | 3  | 1 | 25 | 2002 |
| 14,5 | 21,5  | 0,7 | 4  | 1 | 22 | 2011 |
| 14,5 | 21,5  | 0,7 | 4  | 1 | 22 | 2013 |
| 13   | 15,5  | 0,7 | 2  | 1 | 26 | 1999 |
| 13   | 15,5  | 0,7 | 3  | 1 | 25 | 2007 |
| 11,7 | 11,3  | 0,7 | 2  | 1 | 20 | 2009 |
| 16   | 28,9  | 0,7 | 4  | 1 | 20 | 2011 |

|      |      |     |    |   |    |      |
|------|------|-----|----|---|----|------|
| 13,3 | 16,6 | 0,7 | 2  | 1 | 22 | 2002 |
| 12,1 | 12,5 | 0,7 | 3  | 1 | 23 | 2008 |
| 12,1 | 12,5 | 0,7 | 2  | 1 | 23 | 2009 |
| 16,2 | 30   | 0,7 | 7  | 1 | 21 | 1999 |
| 16,5 | 31,7 | 0,7 | 5  | 1 | 21 | 2000 |
| 15,1 | 24,3 | 0,7 | 4  | 1 | 23 | 2008 |
| 11,8 | 11,6 | 0,7 | 2  | 1 | 25 | 2004 |
| 12   | 12,2 | 0,7 | 2  | 1 | 23 | 2009 |
| 16,7 | 32,9 | 0,7 | 10 | 1 | 20 | 2003 |
| 14,8 | 22,9 | 0,7 | 5  | 1 | 22 | 2002 |
| 15,4 | 25,8 | 0,7 | 4  | 1 | 22 | 2011 |
| 15,4 | 25,8 | 0,7 | 4  | 1 | 21 | 2013 |
| 16,9 | 34,1 | 0,7 | 8  | 1 | 25 | 1999 |
| 13,4 | 17   | 0,7 | 2  | 1 | 26 | 2000 |
| 13,4 | 17   | 0,7 | 3  | 1 | 26 | 2005 |
| 13,4 | 17   | 0,7 | 4  | 1 | 24 | 2009 |
| 12,5 | 13,8 | 0,7 | 5  | 1 | 26 | 2006 |
| 10,2 | 7,5  | 0,7 | 1  | 1 | 18 | 2007 |
| 20,7 | 62,7 | 0,7 | 10 | 1 | 22 | 2013 |

|      |      |     |   |   |    |      |
|------|------|-----|---|---|----|------|
| 14   | 19,4 | 0,7 | 4 | 1 | 27 | 1999 |
| 14   | 19,4 | 0,7 | 2 | 1 | 24 | 2002 |
| 14   | 19,4 | 0,7 | 3 | 1 | 24 | 2006 |
| 19   | 48,5 | 0,7 | 7 | 1 | 20 | 2013 |
| 17,5 | 37,9 | 0,7 | 4 | 1 | 18 | 2012 |
| 13,1 | 15,9 | 0,7 | 2 | 1 | 26 | 2005 |
| 13,7 | 18,2 | 0,7 | 3 | 1 | 25 | 2005 |
| 13,7 | 18,2 | 0,7 | 3 | 1 | 25 | 2008 |
| 13,7 | 18,2 | 0,7 | 3 | 1 | 15 | 2015 |
| 12,7 | 14,5 | 0,7 | 2 | 1 | 22 | 2000 |
| 16   | 29   | 0,7 | 5 | 1 | 22 | 2000 |
| 15,7 | 27,4 | 0,7 | 4 | 1 | 20 | 2003 |
| 15   | 23,9 | 0,7 | 5 | 1 | 22 | 1999 |
| 15   | 23,9 | 0,7 | 5 | 1 | 20 | 2011 |
| 15   | 23,9 | 0,7 | 5 | 1 | 19 | 2012 |
| 16,6 | 32,4 | 0,7 | 6 | 1 | 19 | 2000 |
| 15,6 | 26,9 | 0,7 | 7 | 1 | 22 | 2001 |
| 15,1 | 24,4 | 0,7 | 4 | 1 | 27 | 1999 |
| 14,2 | 20,3 | 0,7 | 3 | 1 | 26 | 2000 |

|      |      |     |   |   |    |      |
|------|------|-----|---|---|----|------|
| 15,9 | 28,5 | 0,7 | 5 | 1 | 18 | 2008 |
| 15,2 | 24,9 | 0,7 | 7 | 1 | 25 | 2008 |
| 15,2 | 24,9 | 0,7 | 8 | 1 | 19 | 2012 |
| 15,4 | 25,9 | 0,7 | 4 | 1 | 27 | 1999 |
| 17,8 | 40   | 0,7 | 5 | 1 | 19 | 2000 |
| 11,1 | 9,7  | 0,7 | 2 | 1 | 25 | 2004 |
| 12,3 | 13,2 | 0,7 | 2 | 1 | 26 | 2000 |
| 17,2 | 36,1 | 0,7 | 8 | 1 | 19 | 2013 |
| 21,2 | 67,6 | 0,7 | 6 | 1 | 18 | 2012 |
| 16,4 | 31,3 | 0,7 | 6 | 1 | 19 | 2011 |
| 13,3 | 16,7 | 0,7 | 4 | 1 | 23 | 2006 |
| 13,3 | 16,7 | 0,7 | 2 | 1 | 19 | 2012 |
| 12,6 | 14,2 | 0,7 | 3 | 1 | 21 | 2011 |
| 14,1 | 19,9 | 0,7 | 3 | 1 | 20 | 2011 |
| 17,1 | 35,5 | 0,7 | 7 | 1 | 18 | 2012 |
| 17,1 | 35,5 | 0,7 | 6 | 1 | 20 | 2013 |
| 14,4 | 21,2 | 0,7 | 4 | 1 | 21 | 1999 |
| 14,4 | 21,2 | 0,7 | 3 | 1 | 23 | 2003 |
| 13   | 15,6 | 0,7 | 4 | 1 | 23 | 2005 |

|      |      |     |   |   |    |      |
|------|------|-----|---|---|----|------|
| 16,2 | 30,2 | 0,7 | 7 | 1 | 21 | 1999 |
| 16,2 | 30,2 | 0,7 | 7 | 1 | 18 | 2012 |
| 12,2 | 12,9 | 0,7 | 2 | 1 | 24 | 2002 |
| 16   | 29,1 | 0,7 | 5 | 1 | 18 | 1999 |
| 16   | 29,1 | 0,7 | 5 | 1 | 20 | 1999 |
| 16   | 29,1 | 0,7 | 5 | 1 | 18 | 2000 |
| 19,2 | 50,3 | 0,7 | 5 | 1 | 18 | 2012 |
| 17,8 | 40,1 | 0,7 | 6 | 1 | 19 | 2000 |
| 17,8 | 40,1 | 0,7 | 5 | 1 | 19 | 2013 |
| 16,3 | 30,8 | 0,7 | 6 | 1 | 22 | 2003 |
| 12,1 | 12,6 | 0,7 | 2 | 1 | 17 | 2014 |
| 13,5 | 17,5 | 0,7 | 2 | 1 | 21 | 2000 |
| 14,7 | 22,6 | 0,7 | 7 | 1 | 22 | 1999 |
| 14,7 | 22,6 | 0,7 | 3 | 1 | 21 | 2000 |
| 15,9 | 28,6 | 0,7 | 5 | 1 | 19 | 2012 |
| 15,9 | 28,6 | 0,7 | 6 | 1 | 20 | 2013 |
| 13,8 | 18,7 | 0,7 | 4 | 1 | 23 | 2008 |
| 15,5 | 26,5 | 0,7 | 5 | 1 | 18 | 2000 |
| 15,5 | 26,5 | 0,7 | 5 | 1 | 26 | 2000 |

|      |      |     |    |   |    |      |
|------|------|-----|----|---|----|------|
| 16,1 | 29,7 | 0,7 | 6  | 1 | 20 | 2011 |
| 12,5 | 13,9 | 0,7 | 2  | 1 | 23 | 2003 |
| 12,5 | 13,9 | 0,7 | 4  | 1 | 25 | 2008 |
| 12,5 | 13,9 | 0,7 | 3  | 1 | 20 | 2013 |
| 13,7 | 18,3 | 0,7 | 2  | 1 | 26 | 2000 |
| 13,1 | 16   | 0,7 | 3  | 1 | 25 | 2007 |
| 13,1 | 16   | 0,7 | 3  | 1 | 25 | 2008 |
| 16,4 | 31,4 | 0,7 | 10 | 1 | 23 | 2008 |
| 11,8 | 11,7 | 0,7 | 3  | 1 | 25 | 2004 |
| 18,5 | 45,1 | 0,7 | 6  | 1 | 19 | 2013 |
| 15,8 | 28,1 | 0,7 | 5  | 1 | 19 | 2012 |
| 14,2 | 20,4 | 0,7 | 5  | 1 | 25 | 1999 |
| 16,2 | 30,3 | 0,7 | 10 | 1 | 19 | 2011 |
| 12,7 | 14,6 | 0,7 | 2  | 1 | 26 | 2001 |
| 12,7 | 14,6 | 0,7 | 2  | 1 | 22 | 2002 |
| 12,7 | 14,6 | 0,7 | 3  | 1 | 25 | 2005 |
| 16,7 | 33,2 | 0,7 | 7  | 1 | 22 | 2002 |
| 16   | 29,2 | 0,7 | 6  | 1 | 19 | 2013 |
| 13,2 | 16,4 | 0,7 | 6  | 1 | 23 | 2008 |

|      |      |     |    |   |    |      |
|------|------|-----|----|---|----|------|
| 19,9 | 56,2 | 0,7 | 5  | 1 | 17 | 2012 |
| 12,4 | 13,6 | 0,7 | 2  | 1 | 22 | 2002 |
| 14,4 | 21,3 | 0,7 | 4  | 1 | 20 | 2009 |
| 19,5 | 52,9 | 0,7 | 5  | 1 | 19 | 2012 |
| 14,1 | 20   | 0,7 | 6  | 1 | 23 | 2008 |
| 15,6 | 27,1 | 0,7 | 6  | 1 | 19 | 1999 |
| 15,6 | 27,1 | 0,7 | 5  | 1 | 21 | 1999 |
| 15,6 | 27,1 | 0,7 | 6  | 1 | 20 | 2000 |
| 17,1 | 35,7 | 0,7 | 10 | 1 | 21 | 2013 |
| 15,9 | 28,7 | 0,7 | 5  | 1 | 21 | 2012 |
| 16,1 | 29,8 | 0,7 | 5  | 1 | 19 | 2012 |
| 13,3 | 16,8 | 0,7 | 2  | 1 | 26 | 2000 |
| 18,4 | 44,5 | 0,7 | 9  | 1 | 18 | 2012 |
| 15,1 | 24,6 | 0,7 | 4  | 1 | 20 | 2011 |
| 17,3 | 37   | 0,7 | 6  | 1 | 16 | 2008 |
| 15,4 | 26,1 | 0,7 | 6  | 1 | 21 | 1999 |
| 15,4 | 26,1 | 0,7 | 3  | 1 | 19 | 2013 |
| 12,3 | 13,3 | 0,7 | 2  | 1 | 18 | 2014 |
| 14,3 | 20,9 | 0,7 | 4  | 1 | 27 | 1999 |

|      |      |     |   |   |    |      |
|------|------|-----|---|---|----|------|
| 14,3 | 20,9 | 0,7 | 2 | 1 | 26 | 2000 |
| 14,3 | 20,9 | 0,7 | 2 | 1 | 26 | 2000 |
| 14,3 | 20,9 | 0,7 | 4 | 1 | 18 | 2012 |
| 15,2 | 25,1 | 0,7 | 6 | 1 | 25 | 1999 |
| 15,3 | 25,6 | 0,7 | 5 | 1 | 18 | 2012 |
| 15,3 | 25,6 | 0,7 | 6 | 1 | 19 | 2013 |
| 19,2 | 50,6 | 0,7 | 7 | 1 | 18 | 2012 |
| 13,9 | 19,2 | 0,7 | 2 | 1 | 27 | 1999 |
| 13,9 | 19,2 | 0,7 | 2 | 1 | 21 | 2000 |
| 15,8 | 28,2 | 0,7 | 4 | 1 | 19 | 2012 |
| 18   | 41,7 | 0,7 | 7 | 1 | 17 | 2012 |
| 18   | 41,7 | 0,7 | 5 | 1 | 22 | 2013 |
| 14,5 | 21,8 | 0,7 | 5 | 1 | 19 | 2012 |
| 13,5 | 17,6 | 0,7 | 3 | 1 | 26 | 2005 |
| 13,5 | 17,6 | 0,7 | 3 | 1 | 19 | 2011 |
| 13,7 | 18,4 | 0,7 | 2 | 1 | 24 | 2002 |
| 13,7 | 18,4 | 0,7 | 2 | 1 | 25 | 2005 |
| 15,7 | 27,7 | 0,7 | 7 | 1 | 20 | 2006 |
| 12,2 | 13   | 0,7 | 2 | 1 | 25 | 2002 |

|      |      |     |   |   |    |      |
|------|------|-----|---|---|----|------|
| 12,2 | 13   | 0,7 | 2 | 1 | 25 | 2007 |
| 12,2 | 13   | 0,7 | 2 | 1 | 20 | 2009 |
| 14,2 | 20,5 | 0,7 | 3 | 1 | 22 | 2000 |
| 13,1 | 16,1 | 0,7 | 3 | 1 | 25 | 2007 |
| 14,9 | 23,7 | 0,7 | 4 | 1 | 20 | 2011 |
| 14,9 | 23,7 | 0,7 | 7 | 1 | 19 | 2012 |
| 17,5 | 38,4 | 0,7 | 6 | 1 | 19 | 2013 |
| 14,4 | 21,4 | 0,7 | 5 | 1 | 27 | 1999 |
| 16,5 | 32,2 | 0,7 | 6 | 1 | 19 | 2000 |
| 12,1 | 12,7 | 0,7 | 2 | 1 | 26 | 2005 |
| 15   | 24,2 | 0,7 | 5 | 1 | 26 | 2000 |
| 12,9 | 15,4 | 0,7 | 2 | 1 | 24 | 2002 |
| 13,2 | 16,5 | 0,7 | 3 | 1 | 21 | 2008 |
| 15,1 | 24,7 | 0,7 | 5 | 1 | 20 | 1999 |
| 15,3 | 25,7 | 0,7 | 9 | 1 | 26 | 1999 |
| 14   | 19,7 | 0,7 | 3 | 1 | 21 | 2008 |
| 16,3 | 31,1 | 0,7 | 6 | 1 | 21 | 2013 |
| 18,2 | 43,3 | 0,7 | 8 | 1 | 22 | 2013 |
| 13,3 | 16,9 | 0,7 | 2 | 1 | 19 | 2000 |

|      |      |     |   |   |    |      |
|------|------|-----|---|---|----|------|
| 13,3 | 16,9 | 0,7 | 3 | 1 | 17 | 2014 |
| 12,4 | 13,7 | 0,7 | 3 | 1 | 25 | 2005 |
| 13,4 | 17,3 | 0,7 | 4 | 1 | 23 | 2002 |
| 13,4 | 17,3 | 0,7 | 3 | 1 | 20 | 2011 |
| 16,8 | 34,1 | 0,7 | 5 | 1 | 18 | 2001 |
| 13,5 | 17,7 | 0,7 | 3 | 1 | 25 | 2007 |
| 13,5 | 17,7 | 0,7 | 3 | 1 | 15 | 2015 |
| 17,4 | 37,9 | 0,7 | 5 | 1 | 19 | 2000 |
| 13,6 | 18,1 | 0,7 | 4 | 1 | 21 | 2012 |
| 16,2 | 30,6 | 0,7 | 5 | 1 | 19 | 2012 |
| 14,6 | 22,4 | 0,7 | 6 | 1 | 27 | 1999 |
| 12,8 | 15,1 | 0,7 | 2 | 1 | 22 | 2000 |
| 15,8 | 28,4 | 0,7 | 5 | 1 | 19 | 2012 |
| 14,4 | 21,5 | 0,7 | 5 | 1 | 27 | 1999 |
| 14,4 | 21,5 | 0,7 | 6 | 1 | 19 | 2000 |
| 12,3 | 13,4 | 0,7 | 2 | 1 | 22 | 2000 |
| 12,3 | 13,4 | 0,7 | 2 | 1 | 19 | 2008 |
| 12,3 | 13,4 | 0,7 | 2 | 1 | 23 | 2008 |
| 15,2 | 25,3 | 0,7 | 4 | 1 | 27 | 1999 |

|      |      |     |    |   |    |      |
|------|------|-----|----|---|----|------|
| 15,2 | 25,3 | 0,7 | 4  | 1 | 23 | 2008 |
| 17   | 35,4 | 0,7 | 6  | 1 | 22 | 2002 |
| 14,1 | 20,2 | 0,7 | 3  | 1 | 25 | 2002 |
| 14,7 | 22,9 | 0,7 | 3  | 1 | 23 | 2003 |
| 14,7 | 22,9 | 0,7 | 4  | 1 | 21 | 2006 |
| 15,7 | 27,9 | 0,7 | 7  | 1 | 23 | 1999 |
| 15,7 | 27,9 | 0,7 | 4  | 1 | 22 | 2011 |
| 15,7 | 27,9 | 0,7 | 6  | 1 | 19 | 2013 |
| 16,1 | 30,1 | 0,7 | 6  | 1 | 22 | 2013 |
| 12,2 | 13,1 | 0,7 | 3  | 1 | 25 | 2007 |
| 14,3 | 21,1 | 0,7 | 3  | 1 | 21 | 2000 |
| 14   | 19,8 | 0,7 | 3  | 1 | 25 | 2002 |
| 14,5 | 22   | 0,7 | 8  | 1 | 26 | 2001 |
| 14,5 | 22   | 0,7 | 5  | 1 | 18 | 2014 |
| 13,2 | 16,6 | 0,7 | 4  | 1 | 21 | 2012 |
| 14,8 | 23,4 | 0,7 | 3  | 1 | 26 | 2001 |
| 14,8 | 23,4 | 0,7 | 3  | 1 | 22 | 2015 |
| 19,1 | 50,3 | 0,7 | 10 | 1 | 20 | 2013 |
| 16,2 | 30,7 | 0,7 | 8  | 1 | 18 | 2008 |

|      |      |     |   |   |    |      |
|------|------|-----|---|---|----|------|
| 17,3 | 37,4 | 0,7 | 6 | 1 | 22 | 2003 |
| 15,5 | 26,9 | 0,7 | 3 | 1 | 19 | 2011 |
| 15,8 | 28,5 | 0,7 | 5 | 1 | 18 | 2012 |
| 13,3 | 17   | 0,7 | 3 | 1 | 22 | 2002 |
| 21,9 | 75,9 | 0,7 | 9 | 1 | 18 | 2012 |
| 13,8 | 19   | 0,7 | 2 | 1 | 26 | 2000 |
| 15,3 | 25,9 | 0,7 | 5 | 1 | 19 | 2000 |
| 13,4 | 17,4 | 0,7 | 6 | 1 | 22 | 2011 |
| 18,5 | 45,8 | 0,7 | 9 | 1 | 23 | 2002 |
| 13,7 | 18,6 | 0,7 | 4 | 1 | 26 | 2000 |
| 14,4 | 21,6 | 0,7 | 3 | 1 | 25 | 2008 |
| 12   | 12,5 | 0,7 | 2 | 1 | 22 | 2002 |
| 12   | 12,5 | 0,7 | 2 | 1 | 19 | 2013 |
| 13,5 | 17,8 | 0,7 | 3 | 1 | 22 | 2002 |
| 13,5 | 17,8 | 0,7 | 3 | 1 | 25 | 2002 |
| 13,6 | 18,2 | 0,7 | 2 | 1 | 22 | 2002 |
| 15,7 | 28   | 0,7 | 5 | 1 | 25 | 2005 |
| 16,7 | 33,7 | 0,7 | 6 | 1 | 20 | 2013 |
| 18   | 42,2 | 0,7 | 6 | 1 | 20 | 2013 |

|      |      |     |   |   |    |      |
|------|------|-----|---|---|----|------|
| 13   | 15,9 | 0,7 | 2 | 1 | 25 | 2002 |
| 12,4 | 13,8 | 0,7 | 2 | 1 | 22 | 2002 |
| 12,4 | 13,8 | 0,7 | 2 | 1 | 23 | 2002 |
| 11,6 | 11,3 | 0,7 | 2 | 1 | 25 | 2007 |
| 11,9 | 12,2 | 0,7 | 2 | 1 | 25 | 2007 |
| 14,7 | 23   | 0,7 | 3 | 1 | 23 | 2003 |
| 14,1 | 20,3 | 0,7 | 4 | 1 | 23 | 1999 |
| 17,3 | 37,5 | 0,7 | 4 | 1 | 18 | 2012 |
| 11,8 | 11,9 | 0,7 | 2 | 1 | 20 | 2009 |
| 17,6 | 39,5 | 0,7 | 6 | 1 | 22 | 2013 |
| 17   | 35,6 | 0,7 | 6 | 1 | 23 | 2006 |
| 14,3 | 21,2 | 0,7 | 6 | 1 | 23 | 2008 |
| 15,8 | 28,6 | 0,7 | 6 | 1 | 21 | 2003 |
| 14   | 19,9 | 0,7 | 7 | 1 | 25 | 1999 |
| 14   | 19,9 | 0,7 | 2 | 1 | 21 | 2000 |
| 18   | 42,3 | 0,7 | 7 | 1 | 20 | 2013 |
| 12,3 | 13,5 | 0,7 | 2 | 1 | 22 | 2002 |
| 12,3 | 13,5 | 0,7 | 2 | 1 | 20 | 2009 |
| 15,4 | 26,5 | 0,7 | 8 | 1 | 26 | 2006 |

|      |      |     |   |   |    |      |
|------|------|-----|---|---|----|------|
| 16,6 | 33,2 | 0,7 | 7 | 1 | 24 | 2006 |
| 15   | 24,5 | 0,7 | 3 | 1 | 16 | 2008 |
| 15,3 | 26   | 0,7 | 6 | 1 | 27 | 1999 |
| 15,3 | 26   | 0,7 | 4 | 1 | 18 | 2012 |
| 17,1 | 36,3 | 0,7 | 8 | 1 | 22 | 2013 |
| 13,2 | 16,7 | 0,7 | 4 | 1 | 26 | 2005 |
| 13,2 | 16,7 | 0,7 | 3 | 1 | 23 | 2008 |
| 15,1 | 25   | 0,7 | 3 | 1 | 25 | 2002 |
| 15,2 | 25,5 | 0,7 | 4 | 1 | 22 | 2011 |
| 14,6 | 22,6 | 0,7 | 3 | 1 | 19 | 2012 |
| 13,7 | 18,7 | 0,7 | 3 | 1 | 27 | 1999 |
| 13,7 | 18,7 | 0,7 | 2 | 1 | 21 | 2000 |
| 13,7 | 18,7 | 0,7 | 2 | 1 | 21 | 2000 |
| 13,7 | 18,7 | 0,7 | 4 | 1 | 22 | 2002 |
| 13,7 | 18,7 | 0,7 | 2 | 1 | 24 | 2002 |
| 16,3 | 31,5 | 0,7 | 6 | 1 | 21 | 2003 |
| 12,7 | 14,9 | 0,7 | 2 | 1 | 26 | 2000 |
| 12,7 | 14,9 | 0,7 | 3 | 1 | 25 | 2005 |
| 12,7 | 14,9 | 0,7 | 2 | 1 | 25 | 2008 |

|      |      |     |    |   |    |      |
|------|------|-----|----|---|----|------|
| 13,5 | 17,9 | 0,7 | 2  | 1 | 26 | 2000 |
| 13,5 | 17,9 | 0,7 | 3  | 1 | 22 | 2002 |
| 16,8 | 34,5 | 0,7 | 5  | 1 | 18 | 2000 |
| 14,1 | 20,4 | 0,7 | 5  | 1 | 25 | 1999 |
| 20,5 | 62,7 | 0,7 | 10 | 1 | 18 | 2012 |
| 16,5 | 32,7 | 0,7 | 5  | 1 | 19 | 2012 |
| 10,1 | 7,5  | 0,7 | 1  | 1 | 26 | 2009 |
| 17,3 | 37,7 | 0,7 | 9  | 1 | 19 | 2011 |
| 12,1 | 12,9 | 0,7 | 2  | 1 | 25 | 1999 |
| 14,5 | 22,2 | 0,7 | 3  | 1 | 26 | 2000 |
| 13   | 16   | 0,7 | 2  | 1 | 21 | 2000 |
| 15,4 | 26,6 | 0,7 | 3  | 1 | 22 | 2002 |
| 15,4 | 26,6 | 0,7 | 5  | 1 | 20 | 2012 |
| 14,3 | 21,3 | 0,7 | 5  | 1 | 22 | 2000 |
| 14   | 20   | 0,7 | 4  | 1 | 22 | 2011 |
| 15   | 24,6 | 0,7 | 5  | 1 | 27 | 1999 |
| 12,4 | 13,9 | 0,7 | 2  | 1 | 24 | 2009 |
| 12   | 12,6 | 0,7 | 2  | 1 | 21 | 2013 |
| 18,2 | 44   | 0,7 | 8  | 1 | 18 | 2012 |

|      |      |     |    |   |    |      |
|------|------|-----|----|---|----|------|
| 12,6 | 14,6 | 0,7 | 2  | 1 | 25 | 2002 |
| 14,7 | 23,2 | 0,7 | 3  | 1 | 15 | 2015 |
| 13,2 | 16,8 | 0,7 | 3  | 1 | 25 | 2003 |
| 18   | 42,6 | 0,7 | 10 | 1 | 18 | 2012 |
| 13,8 | 19,2 | 0,7 | 4  | 1 | 22 | 2002 |
| 17   | 35,9 | 0,7 | 7  | 1 | 19 | 2012 |
| 13,3 | 17,2 | 0,7 | 3  | 1 | 23 | 2008 |
| 13,7 | 18,8 | 0,7 | 2  | 1 | 24 | 2002 |
| 13,7 | 18,8 | 0,7 | 2  | 1 | 18 | 2012 |
| 16,9 | 35,3 | 0,7 | 8  | 1 | 19 | 2013 |
| 12,9 | 15,7 | 0,7 | 3  | 1 | 26 | 2005 |
| 13,4 | 17,6 | 0,7 | 2  | 1 | 22 | 2002 |
| 13,4 | 17,6 | 0,7 | 2  | 1 | 24 | 2002 |
| 15,3 | 26,2 | 0,7 | 5  | 1 | 21 | 2001 |
| 14,9 | 24,2 | 0,7 | 4  | 1 | 22 | 2002 |
| 14,9 | 24,2 | 0,7 | 3  | 1 | 25 | 2002 |
| 13,5 | 18   | 0,7 | 2  | 1 | 24 | 2002 |
| 15,2 | 25,7 | 0,7 | 5  | 1 | 26 | 2000 |
| 15   | 24,7 | 0,7 | 4  | 1 | 26 | 1999 |

|      |      |     |   |   |    |      |
|------|------|-----|---|---|----|------|
| 15   | 24,7 | 0,7 | 7 | 1 | 18 | 2012 |
| 12,5 | 14,3 | 0,7 | 2 | 1 | 21 | 2000 |
| 12,7 | 15   | 0,7 | 2 | 1 | 26 | 1999 |
| 16,6 | 33,5 | 0,7 | 6 | 1 | 19 | 2013 |
| 15,5 | 27,3 | 0,7 | 4 | 1 | 20 | 2013 |
| 18,2 | 44,2 | 0,7 | 6 | 1 | 18 | 2012 |
| 14,2 | 21   | 0,7 | 5 | 1 | 21 | 2012 |
| 14,4 | 21,9 | 0,7 | 4 | 1 | 26 | 2000 |
| 14,4 | 21,9 | 0,7 | 3 | 1 | 25 | 2008 |
| 14,4 | 21,9 | 0,7 | 3 | 1 | 25 | 2008 |
| 19,5 | 54,4 | 0,7 | 8 | 1 | 22 | 2013 |
| 15,9 | 29,5 | 0,7 | 6 | 1 | 19 | 2013 |
| 13,1 | 16,5 | 0,7 | 3 | 1 | 25 | 2008 |
| 15,3 | 26,3 | 0,7 | 4 | 1 | 20 | 2013 |
| 12,8 | 15,4 | 0,7 | 2 | 1 | 26 | 1999 |
| 12,8 | 15,4 | 0,7 | 2 | 1 | 25 | 2008 |
| 13,8 | 19,3 | 0,7 | 3 | 1 | 22 | 2000 |
| 15,2 | 25,8 | 0,7 | 5 | 1 | 19 | 2012 |
| 17   | 36,1 | 0,7 | 6 | 1 | 20 | 2013 |

|      |      |     |    |   |    |      |
|------|------|-----|----|---|----|------|
| 13,2 | 16,9 | 0,7 | 4  | 1 | 25 | 2005 |
| 12,6 | 14,7 | 0,7 | 3  | 1 | 25 | 1999 |
| 16   | 30,1 | 0,7 | 10 | 1 | 23 | 2008 |
| 14,1 | 20,6 | 0,7 | 5  | 1 | 22 | 2002 |
| 14,1 | 20,6 | 0,7 | 4  | 1 | 25 | 2007 |
| 17,2 | 37,4 | 0,7 | 6  | 1 | 21 | 2001 |
| 13,7 | 18,9 | 0,7 | 3  | 1 | 23 | 2003 |
| 14,3 | 21,5 | 0,7 | 3  | 1 | 17 | 2008 |
| 13,6 | 18,5 | 0,7 | 5  | 1 | 22 | 2000 |
| 13,6 | 18,5 | 0,7 | 4  | 1 | 26 | 2005 |
| 18   | 42,9 | 0,7 | 8  | 1 | 21 | 2013 |
| 18   | 42,9 | 0,7 | 6  | 1 | 19 | 2013 |
| 13,4 | 17,7 | 0,7 | 4  | 1 | 25 | 2008 |
| 17,7 | 40,8 | 0,7 | 5  | 1 | 20 | 2013 |
| 15,5 | 27,4 | 0,7 | 7  | 1 | 21 | 2012 |
| 14,6 | 22,9 | 0,7 | 4  | 1 | 22 | 2000 |
| 14,6 | 22,9 | 0,7 | 5  | 1 | 21 | 2003 |
| 15,9 | 29,6 | 0,7 | 5  | 1 | 21 | 2012 |
| 23,2 | 92   | 0,7 | 8  | 1 | 18 | 2012 |

|      |      |     |   |   |    |      |
|------|------|-----|---|---|----|------|
| 14,2 | 21,1 | 0,7 | 4 | 1 | 21 | 2000 |
| 14,2 | 21,1 | 0,7 | 2 | 1 | 25 | 2002 |
| 14,2 | 21,1 | 0,7 | 5 | 1 | 19 | 2012 |
| 15,3 | 26,4 | 0,7 | 5 | 1 | 21 | 2012 |
| 18   | 43   | 0,7 | 4 | 1 | 21 | 2012 |
| 15,2 | 25,9 | 0,7 | 5 | 1 | 21 | 2000 |
| 15,6 | 28   | 0,7 | 5 | 1 | 23 | 1999 |
| 17,7 | 40,9 | 0,7 | 5 | 1 | 19 | 2000 |
| 19   | 50,6 | 0,7 | 6 | 1 | 15 | 2015 |
| 10,4 | 8,3  | 0,7 | 2 | 1 | 23 | 2004 |
| 13,1 | 16,6 | 0,7 | 5 | 1 | 25 | 2007 |
| 14,3 | 21,6 | 0,7 | 5 | 1 | 23 | 1999 |
| 14,3 | 21,6 | 0,7 | 3 | 1 | 19 | 2012 |
| 16,5 | 33,2 | 0,7 | 6 | 1 | 22 | 2013 |
| 12,8 | 15,5 | 0,7 | 2 | 1 | 25 | 2002 |
| 13,2 | 17   | 0,7 | 2 | 1 | 21 | 2000 |
| 17,8 | 41,7 | 0,7 | 8 | 1 | 20 | 2013 |
| 12,4 | 14,1 | 0,7 | 4 | 1 | 25 | 1999 |
| 12,4 | 14,1 | 0,7 | 3 | 1 | 23 | 2005 |

|      |      |     |    |   |    |      |
|------|------|-----|----|---|----|------|
| 13,3 | 17,4 | 0,7 | 3  | 1 | 23 | 1999 |
| 13,4 | 17,8 | 0,7 | 3  | 1 | 25 | 2008 |
| 11,2 | 10,4 | 0,7 | 2  | 1 | 25 | 2004 |
| 17,6 | 40,4 | 0,7 | 6  | 1 | 21 | 2013 |
| 14,5 | 22,6 | 0,7 | 3  | 1 | 22 | 2003 |
| 12,3 | 13,8 | 0,7 | 3  | 1 | 26 | 2005 |
| 15,7 | 28,7 | 0,7 | 5  | 1 | 26 | 2000 |
| 13   | 16,3 | 0,7 | 2  | 1 | 25 | 2002 |
| 16   | 30,4 | 0,7 | 5  | 1 | 19 | 2012 |
| 14,7 | 23,6 | 0,7 | 4  | 1 | 27 | 1999 |
| 15,2 | 26,1 | 0,7 | 3  | 1 | 26 | 2000 |
| 13,6 | 18,7 | 0,7 | 4  | 1 | 26 | 1999 |
| 19,1 | 51,8 | 0,7 | 5  | 1 | 19 | 2013 |
| 14   | 20,4 | 0,7 | 3  | 1 | 26 | 1999 |
| 14   | 20,4 | 0,7 | 5  | 1 | 21 | 2000 |
| 13,2 | 17,1 | 0,7 | 2  | 1 | 25 | 2008 |
| 13,2 | 17,1 | 0,7 | 3  | 1 | 20 | 2011 |
| 17,3 | 38,5 | 0,7 | 10 | 1 | 16 | 2008 |
| 15   | 25,1 | 0,7 | 7  | 1 | 20 | 1999 |

|      |      |     |   |   |    |      |
|------|------|-----|---|---|----|------|
| 15   | 25,1 | 0,7 | 5 | 1 | 19 | 2012 |
| 13,3 | 17,5 | 0,7 | 4 | 1 | 26 | 1999 |
| 14,2 | 21,3 | 0,7 | 3 | 1 | 26 | 2000 |
| 18   | 43,4 | 0,7 | 8 | 1 | 22 | 2013 |
| 16   | 30,5 | 0,7 | 4 | 1 | 20 | 2013 |
| 13,9 | 20   | 0,7 | 4 | 1 | 26 | 2005 |
| 17,6 | 40,6 | 0,7 | 6 | 1 | 20 | 2013 |
| 17,2 | 37,9 | 0,7 | 6 | 1 | 22 | 2013 |
| 12,1 | 13,2 | 0,7 | 2 | 1 | 25 | 2002 |
| 16,5 | 33,5 | 0,7 | 6 | 1 | 20 | 2013 |
| 13,8 | 19,6 | 0,7 | 2 | 1 | 27 | 1999 |
| 16,4 | 32,9 | 0,7 | 6 | 1 | 19 | 2011 |
| 14,7 | 23,7 | 0,7 | 3 | 1 | 24 | 2001 |
| 15,1 | 25,7 | 0,7 | 9 | 1 | 21 | 1999 |
| 17,8 | 42,1 | 0,7 | 7 | 1 | 18 | 2012 |
| 14,8 | 24,2 | 0,7 | 5 | 1 | 23 | 2007 |
| 15   | 25,2 | 0,7 | 6 | 1 | 23 | 2008 |
| 17,2 | 38   | 0,7 | 6 | 1 | 22 | 2013 |
| 12,7 | 15,3 | 0,7 | 2 | 1 | 22 | 2002 |

|      |      |     |   |   |    |      |
|------|------|-----|---|---|----|------|
| 12,7 | 15,3 | 0,7 | 3 | 1 | 25 | 2008 |
| 12,7 | 15,3 | 0,7 | 3 | 1 | 25 | 2008 |
| 14   | 20,5 | 0,7 | 3 | 1 | 25 | 2007 |
| 14   | 20,5 | 0,7 | 3 | 1 | 25 | 2008 |
| 16,7 | 34,8 | 0,7 | 8 | 1 | 21 | 2001 |
| 13,1 | 16,8 | 0,7 | 3 | 1 | 25 | 2007 |
| 11,2 | 10,5 | 0,7 | 2 | 1 | 22 | 2004 |
| 12,5 | 14,6 | 0,7 | 2 | 1 | 23 | 2002 |
| 18   | 43,6 | 0,7 | 8 | 1 | 20 | 2013 |
| 13,2 | 17,2 | 0,7 | 3 | 1 | 22 | 2002 |
| 13,5 | 18,4 | 0,7 | 4 | 1 | 26 | 1999 |
| 13,5 | 18,4 | 0,7 | 2 | 1 | 26 | 2000 |
| 18,8 | 49,7 | 0,7 | 9 | 1 | 17 | 2012 |
| 16,4 | 33   | 0,7 | 8 | 1 | 19 | 2006 |
| 13,9 | 20,1 | 0,7 | 2 | 1 | 25 | 2002 |
| 12,2 | 13,6 | 0,7 | 3 | 1 | 23 | 2005 |
| 14,1 | 21   | 0,7 | 4 | 1 | 24 | 2006 |
| 14,1 | 21   | 0,7 | 6 | 1 | 20 | 2008 |
| 11,7 | 12   | 0,7 | 2 | 1 | 22 | 2002 |

|      |      |     |   |   |    |      |
|------|------|-----|---|---|----|------|
| 15,1 | 25,8 | 0,7 | 9 | 1 | 20 | 2000 |
| 18,2 | 45,2 | 0,7 | 8 | 1 | 22 | 2013 |
| 16,5 | 33,7 | 0,8 | 7 | 1 | 18 | 2012 |
| 12,1 | 13,3 | 0,8 | 2 | 1 | 25 | 2007 |
| 10,7 | 9,2  | 0,8 | 2 | 1 | 25 | 2004 |
| 13   | 16,5 | 0,8 | 2 | 1 | 25 | 2002 |
| 17   | 36,9 | 0,8 | 6 | 1 | 21 | 2013 |
| 13,5 | 18,5 | 0,8 | 7 | 1 | 27 | 1999 |
| 13,5 | 18,5 | 0,8 | 2 | 1 | 25 | 2005 |
| 16   | 30,8 | 0,8 | 5 | 1 | 19 | 2012 |
| 12,3 | 14   | 0,8 | 3 | 1 | 23 | 2005 |
| 14,3 | 22   | 0,8 | 5 | 1 | 23 | 1999 |
| 16,1 | 31,4 | 0,8 | 5 | 1 | 18 | 2012 |
| 14,1 | 21,1 | 0,8 | 2 | 1 | 21 | 2000 |
| 14,1 | 21,1 | 0,8 | 3 | 1 | 21 | 2012 |
| 16,3 | 32,6 | 0,8 | 6 | 1 | 20 | 2011 |
| 18,2 | 45,4 | 0,8 | 6 | 1 | 22 | 2013 |
| 17   | 37   | 0,8 | 8 | 1 | 18 | 2012 |
| 17   | 37   | 0,8 | 5 | 1 | 20 | 2013 |

|      |      |     |   |   |    |      |
|------|------|-----|---|---|----|------|
| 15,6 | 28,6 | 0,8 | 4 | 1 | 17 | 2008 |
| 18,3 | 46,2 | 0,8 | 6 | 1 | 19 | 2013 |
| 16,6 | 34,5 | 0,8 | 6 | 1 | 19 | 2013 |
| 14   | 20,7 | 0,8 | 4 | 1 | 27 | 1999 |
| 15,7 | 29,2 | 0,8 | 4 | 1 | 22 | 2011 |
| 16,2 | 32,1 | 0,8 | 4 | 1 | 18 | 2012 |
| 15   | 25,5 | 0,8 | 5 | 1 | 21 | 2012 |
| 13   | 16,6 | 0,8 | 3 | 1 | 15 | 2015 |
| 13,1 | 17   | 0,8 | 6 | 1 | 25 | 2008 |
| 13,3 | 17,8 | 0,8 | 2 | 1 | 25 | 2008 |
| 15,3 | 27,1 | 0,8 | 4 | 1 | 25 | 2002 |
| 14,4 | 22,6 | 0,8 | 5 | 1 | 27 | 1999 |
| 16,5 | 34   | 0,8 | 5 | 1 | 18 | 2000 |
| 13,8 | 19,9 | 0,8 | 5 | 1 | 27 | 1999 |
| 13,8 | 19,9 | 0,8 | 6 | 1 | 25 | 2008 |
| 12,5 | 14,8 | 0,8 | 2 | 1 | 22 | 2002 |
| 15,8 | 29,9 | 0,8 | 5 | 1 | 21 | 2012 |
| 14,6 | 23,6 | 0,8 | 8 | 1 | 26 | 1999 |
| 15   | 25,6 | 0,8 | 3 | 1 | 25 | 2002 |

|      |      |     |    |   |    |      |
|------|------|-----|----|---|----|------|
| 15,6 | 28,8 | 0,8 | 3  | 1 | 19 | 2000 |
| 11   | 10,1 | 0,8 | 2  | 1 | 23 | 2005 |
| 16,5 | 34,1 | 0,8 | 4  | 1 | 18 | 2012 |
| 16   | 31,1 | 0,8 | 4  | 1 | 19 | 2013 |
| 16,2 | 32,3 | 0,8 | 5  | 1 | 19 | 2012 |
| 12,6 | 15,2 | 0,8 | 3  | 1 | 22 | 2002 |
| 13   | 16,7 | 0,8 | 3  | 1 | 25 | 2008 |
| 13,1 | 17,1 | 0,8 | 4  | 1 | 25 | 2008 |
| 13,3 | 17,9 | 0,8 | 2  | 1 | 25 | 2002 |
| 17,5 | 40,8 | 0,8 | 6  | 1 | 20 | 2013 |
| 14,2 | 21,8 | 0,8 | 3  | 1 | 25 | 2002 |
| 12,7 | 15,6 | 0,8 | 2  | 1 | 22 | 2002 |
| 14   | 20,9 | 0,8 | 4  | 1 | 25 | 2002 |
| 11,7 | 12,2 | 0,8 | 2  | 1 | 26 | 1999 |
| 14,7 | 24,2 | 0,8 | 3  | 1 | 23 | 2007 |
| 16,1 | 31,8 | 0,8 | 9  | 1 | 20 | 2013 |
| 20,1 | 61,9 | 0,8 | 5  | 1 | 17 | 2012 |
| 22,3 | 84,6 | 0,8 | 10 | 1 | 18 | 2012 |
| 12,5 | 14,9 | 0,8 | 2  | 1 | 21 | 2009 |

|      |      |     |    |   |    |      |
|------|------|-----|----|---|----|------|
| 12,8 | 16   | 0,8 | 3  | 1 | 21 | 2014 |
| 15,8 | 30,1 | 0,8 | 10 | 1 | 23 | 2002 |
| 10,2 | 8,1  | 0,8 | 2  | 1 | 19 | 2007 |
| 13,6 | 19,2 | 0,8 | 4  | 1 | 21 | 2008 |
| 20,1 | 62   | 0,8 | 10 | 1 | 19 | 2012 |
| 14,4 | 22,8 | 0,8 | 5  | 1 | 22 | 2002 |
| 15,4 | 27,9 | 0,8 | 5  | 1 | 24 | 2006 |
| 19   | 52,4 | 0,8 | 7  | 1 | 18 | 2012 |
| 16,4 | 33,7 | 0,8 | 4  | 1 | 19 | 2013 |
| 14,5 | 23,3 | 0,8 | 5  | 1 | 21 | 2012 |
| 13   | 16,8 | 0,8 | 2  | 1 | 22 | 2002 |
| 14,2 | 21,9 | 0,8 | 4  | 1 | 25 | 2008 |
| 12,6 | 15,3 | 0,8 | 2  | 1 | 25 | 2002 |
| 12,6 | 15,3 | 0,8 | 3  | 1 | 23 | 2008 |
| 14,8 | 24,8 | 0,8 | 7  | 1 | 20 | 1999 |
| 14   | 21   | 0,8 | 4  | 1 | 21 | 2012 |
| 15,5 | 28,5 | 0,8 | 5  | 1 | 21 | 2000 |
| 15,5 | 28,5 | 0,8 | 5  | 1 | 25 | 2002 |
| 15,5 | 28,5 | 0,8 | 6  | 1 | 21 | 2003 |

|      |      |     |    |   |    |      |
|------|------|-----|----|---|----|------|
| 15,8 | 30,2 | 0,8 | 5  | 1 | 19 | 2012 |
| 14,3 | 22,4 | 0,8 | 5  | 1 | 26 | 1999 |
| 13,7 | 19,7 | 0,8 | 5  | 1 | 22 | 2002 |
| 18,1 | 45,5 | 0,8 | 10 | 1 | 22 | 2013 |
| 14,5 | 23,4 | 0,8 | 4  | 1 | 22 | 2002 |
| 18   | 44,8 | 0,8 | 6  | 1 | 20 | 2013 |
| 13,8 | 20,2 | 0,8 | 3  | 1 | 22 | 2002 |
| 13   | 16,9 | 0,8 | 3  | 1 | 26 | 2005 |
| 15,1 | 26,5 | 0,8 | 4  | 1 | 19 | 2012 |
| 13,7 | 19,8 | 0,8 | 3  | 1 | 25 | 2008 |
| 20,4 | 65,4 | 0,8 | 8  | 1 | 18 | 2012 |
| 15,3 | 27,6 | 0,8 | 4  | 1 | 25 | 2002 |
| 16,9 | 37,2 | 0,8 | 7  | 1 | 21 | 2001 |
| 16,3 | 33,4 | 0,8 | 5  | 1 | 18 | 2012 |
| 13,6 | 19,4 | 0,8 | 2  | 1 | 25 | 2008 |
| 15,6 | 29,3 | 0,8 | 5  | 1 | 21 | 2000 |
| 12,8 | 16,2 | 0,8 | 2  | 1 | 25 | 2002 |
| 19,2 | 54,7 | 0,8 | 8  | 1 | 21 | 2013 |
| 13,4 | 18,6 | 0,8 | 2  | 1 | 21 | 2000 |

|      |      |     |   |   |    |      |
|------|------|-----|---|---|----|------|
| 13,4 | 18,6 | 0,8 | 2 | 1 | 22 | 2002 |
| 15   | 26,1 | 0,8 | 6 | 1 | 19 | 2008 |
| 12,3 | 14,4 | 0,8 | 5 | 1 | 21 | 2006 |
| 13,7 | 19,9 | 0,8 | 2 | 1 | 26 | 2000 |
| 13,1 | 17,4 | 0,8 | 2 | 1 | 25 | 2002 |
| 15,6 | 29,4 | 0,8 | 9 | 1 | 20 | 2000 |
| 11,6 | 12,1 | 0,8 | 3 | 1 | 26 | 2005 |
| 14,2 | 22,2 | 0,8 | 3 | 1 | 23 | 2001 |
| 15,5 | 28,9 | 0,8 | 8 | 1 | 20 | 2013 |
| 13,4 | 18,7 | 0,8 | 2 | 1 | 21 | 2000 |
| 15,2 | 27,3 | 0,8 | 6 | 1 | 21 | 1999 |
| 14,5 | 23,7 | 0,8 | 3 | 1 | 25 | 2002 |
| 14,7 | 24,7 | 0,8 | 6 | 1 | 20 | 1999 |
| 19,1 | 54,2 | 0,8 | 6 | 1 | 20 | 2013 |
| 13   | 17,1 | 0,8 | 3 | 1 | 25 | 2008 |
| 15,1 | 26,8 | 0,8 | 5 | 1 | 18 | 1999 |
| 13,1 | 17,5 | 0,8 | 3 | 1 | 26 | 2005 |
| 19,2 | 55,1 | 0,8 | 6 | 1 | 21 | 2012 |
| 14,2 | 22,3 | 0,8 | 3 | 1 | 25 | 2002 |

|      |      |     |    |   |    |      |
|------|------|-----|----|---|----|------|
| 12,1 | 13,8 | 0,8 | 3  | 1 | 26 | 2005 |
| 14,4 | 23,3 | 0,8 | 6  | 1 | 21 | 1999 |
| 14,7 | 24,8 | 0,8 | 6  | 1 | 21 | 2000 |
| 12,7 | 16   | 0,8 | 3  | 1 | 21 | 2015 |
| 13,4 | 18,8 | 0,8 | 2  | 1 | 25 | 2002 |
| 13,4 | 18,8 | 0,8 | 2  | 1 | 25 | 2002 |
| 13,4 | 18,8 | 0,8 | 3  | 1 | 25 | 2008 |
| 15,5 | 29,1 | 0,8 | 3  | 1 | 20 | 2003 |
| 13,2 | 18   | 0,8 | 3  | 1 | 25 | 2008 |
| 16,3 | 33,9 | 0,8 | 5  | 1 | 23 | 2006 |
| 18,2 | 47,2 | 0,8 | 8  | 1 | 19 | 2012 |
| 11,4 | 11,6 | 0,8 | 2  | 1 | 23 | 2007 |
| 19,6 | 59   | 0,8 | 9  | 1 | 22 | 2013 |
| 10,7 | 9,6  | 0,8 | 2  | 1 | 25 | 2004 |
| 17,4 | 41,3 | 0,8 | 10 | 1 | 19 | 2012 |
| 18,8 | 52,1 | 0,8 | 6  | 1 | 20 | 2013 |
| 15,1 | 27   | 0,8 | 4  | 1 | 22 | 2013 |
| 13,5 | 19,3 | 0,8 | 4  | 1 | 22 | 1999 |
| 12,6 | 15,7 | 0,8 | 2  | 1 | 22 | 2002 |

|      |      |     |    |   |    |      |
|------|------|-----|----|---|----|------|
| 13,7 | 20,2 | 0,8 | 3  | 1 | 20 | 2013 |
| 12,7 | 16,1 | 0,8 | 2  | 1 | 25 | 2008 |
| 13,6 | 19,8 | 0,8 | 3  | 1 | 26 | 2005 |
| 13,6 | 19,8 | 0,8 | 3  | 1 | 25 | 2008 |
| 13,1 | 17,7 | 0,8 | 3  | 1 | 26 | 2005 |
| 13,5 | 19,4 | 0,8 | 3  | 1 | 25 | 2008 |
| 14,6 | 24,6 | 0,8 | 5  | 1 | 27 | 1999 |
| 13,2 | 18,2 | 0,8 | 2  | 1 | 25 | 2008 |
| 15,5 | 29,5 | 0,8 | 7  | 1 | 19 | 2012 |
| 13   | 17,6 | 0,8 | 2  | 1 | 22 | 2002 |
| 14,7 | 25,5 | 0,8 | 5  | 1 | 22 | 2002 |
| 14,7 | 25,5 | 0,8 | 8  | 1 | 20 | 2011 |
| 17,7 | 44,6 | 0,8 | 10 | 1 | 19 | 2012 |
| 13,5 | 19,8 | 0,8 | 4  | 1 | 25 | 2008 |
| 13,5 | 19,8 | 0,8 | 3  | 1 | 25 | 2008 |
| 12,6 | 16,1 | 0,8 | 3  | 1 | 20 | 2013 |
| 19,2 | 57   | 0,8 | 6  | 1 | 21 | 2013 |
| 13   | 17,7 | 0,8 | 3  | 1 | 25 | 2005 |
| 14,3 | 23,6 | 0,8 | 4  | 1 | 20 | 2013 |

|      |      |     |    |   |    |      |
|------|------|-----|----|---|----|------|
| 10,4 | 9,1  | 0,8 | 1  | 1 | 26 | 2009 |
| 12,9 | 17,4 | 0,8 | 2  | 1 | 22 | 2002 |
| 13,7 | 20,9 | 0,8 | 4  | 1 | 26 | 2005 |
| 13,2 | 18,7 | 0,8 | 4  | 1 | 23 | 2005 |
| 17,3 | 42,1 | 0,8 | 10 | 1 | 19 | 2013 |
| 13,1 | 18,3 | 0,8 | 2  | 1 | 25 | 2002 |
| 13,4 | 19,6 | 0,8 | 2  | 1 | 22 | 2002 |
| 12,6 | 16,3 | 0,8 | 2  | 1 | 25 | 2008 |
| 10,4 | 9,2  | 0,8 | 1  | 1 | 23 | 2015 |
| 14,7 | 26   | 0,8 | 5  | 1 | 19 | 2000 |
| 11   | 10,9 | 0,8 | 1  | 1 | 25 | 2008 |
| 12,9 | 17,6 | 0,8 | 4  | 1 | 24 | 2006 |
| 17,3 | 42,5 | 0,8 | 10 | 1 | 21 | 2012 |
| 13,5 | 20,2 | 0,8 | 4  | 1 | 21 | 2012 |
| 12,1 | 14,6 | 0,8 | 2  | 1 | 25 | 2002 |
| 14,3 | 24,1 | 0,8 | 4  | 1 | 22 | 2011 |
| 13,8 | 21,7 | 0,8 | 4  | 1 | 26 | 2005 |
| 12   | 14,3 | 0,8 | 2  | 1 | 22 | 2002 |
| 13,7 | 21,3 | 0,8 | 3  | 1 | 25 | 2008 |

|      |      |     |   |   |    |      |
|------|------|-----|---|---|----|------|
| 12,8 | 17,4 | 0,8 | 2 | 1 | 25 | 2002 |
| 14,7 | 26,4 | 0,8 | 4 | 1 | 25 | 2008 |
| 14,2 | 23,8 | 0,8 | 5 | 1 | 21 | 2012 |
| 15   | 28,1 | 0,8 | 6 | 1 | 20 | 2013 |
| 14   | 22,9 | 0,8 | 4 | 1 | 22 | 2011 |
| 15,2 | 29,4 | 0,8 | 5 | 1 | 19 | 2012 |
| 14   | 23   | 0,8 | 3 | 1 | 25 | 2002 |
| 12,8 | 17,6 | 0,8 | 4 | 1 | 23 | 2006 |
| 12,7 | 17,2 | 0,8 | 2 | 1 | 25 | 2008 |
| 11,2 | 11,8 | 0,8 | 2 | 1 | 26 | 2005 |
| 13,3 | 19,8 | 0,8 | 6 | 1 | 25 | 2008 |
| 16,1 | 35,3 | 0,8 | 6 | 1 | 22 | 2013 |
| 14,1 | 23,8 | 0,8 | 5 | 1 | 18 | 2012 |
| 12,3 | 15,8 | 0,8 | 2 | 1 | 25 | 2002 |
| 18,1 | 50,6 | 0,9 | 7 | 1 | 18 | 2012 |
| 15,7 | 33,1 | 0,9 | 7 | 1 | 18 | 2012 |
| 14,5 | 26,1 | 0,9 | 5 | 1 | 19 | 2012 |
| 12,7 | 17,6 | 0,9 | 3 | 1 | 25 | 2008 |
| 16,3 | 37,3 | 0,9 | 7 | 1 | 19 | 2012 |

|      |      |     |    |   |    |      |
|------|------|-----|----|---|----|------|
| 13,1 | 19,4 | 0,9 | 4  | 1 | 26 | 2005 |
| 10,1 | 8,9  | 0,9 | 1  | 1 | 26 | 2001 |
| 14,3 | 25,4 | 0,9 | 6  | 1 | 25 | 2008 |
| 16,2 | 37,3 | 0,9 | 6  | 1 | 21 | 2013 |
| 10,4 | 9,9  | 0,9 | 2  | 1 | 23 | 2006 |
| 13,9 | 23,7 | 0,9 | 5  | 1 | 19 | 2007 |
| 14   | 24,3 | 0,9 | 4  | 1 | 25 | 2005 |
| 18,3 | 54,5 | 0,9 | 7  | 1 | 18 | 2012 |
| 16,6 | 41,3 | 0,9 | 7  | 1 | 19 | 2012 |
| 14,1 | 25,4 | 0,9 | 5  | 1 | 26 | 1999 |
| 13,9 | 24,5 | 0,9 | 3  | 1 | 18 | 2004 |
| 17   | 45   | 0,9 | 10 | 1 | 22 | 2013 |
| 15,4 | 33,6 | 0,9 | 5  | 1 | 18 | 2012 |
| 15,3 | 34,1 | 1,0 | 5  | 1 | 20 | 2007 |
| 15,1 | 33,1 | 1,0 | 3  | 1 | 19 | 2000 |
| 12,7 | 20,8 | 1,0 | 3  | 1 | 20 | 2003 |
| 9,6  | 5    | 0,6 | 1  | 0 | 21 | 2006 |
| 7,3  | 2,3  | 0,6 | 1  | 0 | 23 | 2010 |
| 7,3  | 2,3  | 0,6 | 1  | 0 | 23 | 2010 |

|      |      |     |   |   |    |      |
|------|------|-----|---|---|----|------|
| 11,6 | 10,2 | 0,7 | 1 | 0 | 26 | 2001 |
| 11,9 | 7,2  | 0,4 | 1 |   | 18 | 2007 |
| 9    | 3,5  | 0,5 | 1 |   | 22 | 2011 |
| 11,8 | 8,2  | 0,5 | 3 |   | 21 | 2005 |
| 12   | 8,8  | 0,5 | 2 |   | 18 | 2007 |
| 10   | 5,2  | 0,5 | 1 |   | 22 | 2013 |
| 9,7  | 4,8  | 0,5 | 1 |   | 20 | 2003 |
| 10,8 | 6,7  | 0,5 | 1 |   | 22 | 2007 |
| 9    | 3,9  | 0,5 | 1 |   | 21 | 2009 |
| 9,4  | 4,5  | 0,5 | 1 |   | 21 | 2005 |
| 9,6  | 4,8  | 0,5 | 1 |   | 25 | 2003 |
| 14,9 | 18,1 | 0,5 | 3 |   | 25 | 2003 |
| 11,6 | 8,8  | 0,6 | 2 |   | 19 | 2007 |
| 14,5 | 17,8 | 0,6 |   |   | 20 | 2011 |
| 8    | 3    | 0,6 | 1 |   | 25 | 2003 |
| 12,1 | 10,4 | 0,6 | 2 |   | 20 | 2008 |
| 7,9  | 3    | 0,6 | 1 |   | 25 | 2005 |
| 9,3  | 5    | 0,6 | 1 |   | 19 | 2006 |
| 13,3 | 14,7 | 0,6 | 2 |   | 23 | 2007 |

|      |      |     |   |    |      |
|------|------|-----|---|----|------|
| 9,7  | 5,8  | 0,6 | 1 | 26 | 2009 |
| 11,7 | 10,2 | 0,6 | 1 | 26 | 2001 |
| 9,8  | 6    | 0,6 | 2 | 23 | 2004 |
| 10,6 | 7,6  | 0,6 | 1 | 26 | 2001 |
| 10,3 | 7    | 0,6 | 1 | 26 | 2009 |
| 9,3  | 5,2  | 0,6 | 1 | 21 | 2008 |
| 10,1 | 6,7  | 0,7 | 1 | 26 | 2001 |
| 12,2 | 11,9 | 0,7 | 2 | 23 | 2007 |
| 7,7  | 3    | 0,7 | 1 | 25 | 2005 |
| 8,7  | 4,4  | 0,7 | 1 | 26 | 2003 |
| 7,3  | 2,6  | 0,7 | 1 | 25 | 2005 |
| 14   | 18,5 | 0,7 | 3 | 24 | 2001 |
| 8,6  | 4,3  | 0,7 | 1 | 26 | 2003 |
| 8,4  | 4,2  | 0,7 | 1 | 23 | 2003 |
| 9,6  | 6,4  | 0,7 | 1 | 26 | 2003 |
| 8,2  | 4    | 0,7 | 1 | 25 | 2003 |
| 13,8 | 20,1 | 0,8 | 4 | 26 | 1999 |
