# Supplementary material for: Thermal conditions and age structure determine the spawning regularities and condition of Baltic herring ( Clupea harengus membras ) in the NE of the Baltic Sea
Source: PeerJ journal article supplement (doi:10.7717/peerj.7345), 2019-07-22
Supplement: Appendix_2..pdf [file Appendix_2..pdf]

The start of herring spawning, end of spawning, winter air temperature and larval occurrence in 1947-2015.

| <u>Year</u> | <u>Start of spawning</u> | <u>End of spawning</u> | <u>Winter air temperature</u> | <u>Larval occurrence</u> |
|-------------|--------------------------|------------------------|-------------------------------|--------------------------|
| 1947        | 19                       | 26                     | -26,4                         | 21                       |
| 1948        | 18                       | 27                     | -13,9                         | 22                       |
| 1949        | 17                       | 27                     | -4,5                          | 19                       |
| 1953        | 19                       | 28                     | -15,3                         | 21                       |
| 1954        | 18                       | 27                     | -18,4                         | 21                       |
| 1955        | 20                       | 27                     | -16,0                         | 19                       |
| 1964        | 18                       | 27                     | -14,6                         | 20                       |
| 1965        | 18                       | 28                     | -13,6                         | 20                       |
| 1966        | 18                       | 28                     | -21,9                         | 21                       |
| 1974        | 17                       | 26                     | -2,8                          | 20                       |
| 1975        | 17                       | 26                     | -1,4                          | 18                       |
| 1976        | 18                       | 28                     | -18,0                         | 20                       |
| 1984        | 18                       | 28                     | -10,0                         | 20                       |
| 1985        | 18                       | 28                     | -26,8                         | 20                       |
| 1986        | 18                       | 27                     | -15,2                         | 20                       |
| 1999        | 18                       | 29                     | -7,7                          | 20                       |
| 2000        | 18                       | 28                     | -2,4                          | 19                       |
| 2001        | 18                       | 27                     | -6,9                          | 19                       |
| 2002        | 17                       | 28                     | -0,7                          | 19                       |
| 2003        | 20                       | 29                     | -12,3                         | 20                       |
| 2004        | 18                       | 27                     | -9,6                          | 20                       |
| 2005        | 19                       | 24                     | -12,6                         | 20                       |
| 2006        | 19                       | 31                     | -16,9                         | 21                       |
| 2007        | 18                       | 25                     | -6,8                          | 19                       |
| 2008        | 16                       | 26                     | 1,7                           | 18                       |
| 2009        | 17                       | 25                     | -6,9                          | 19                       |
| 2010        | 19                       | 26                     | -21,9                         | 22                       |
| 2011        | 19                       | 26                     | -15,0                         | 21                       |
| 2012        | 17                       | 25                     | -13,1                         | 20                       |
| 2013        | 19                       | 27                     | -14,9                         | 21                       |
| 2014        | 17                       | 27                     | -3,10                         | 19                       |
| 2015        | 15                       | 23                     | 3,3                           | 19                       |
