# Supplementary material for: Thermal conditions and age structure determine the spawning regularities and condition of Baltic herring ( Clupea harengus membras ) in the NE of the Baltic Sea
Source: PeerJ journal article supplement (doi:10.7717/peerj.7345), 2019-07-22
Supplement: Appendix_3..pdf [file Appendix_3..pdf]

The number of young (2-3 yr old) and old (4-8+ yr old) herring in spawning stock (ICES 2018).

| YEAR             | 1999          | 2000          | 2001          | 2002          | 2003          | 2004          | 2005          | 2006          | 2007          | 2008          | 2009          | 2010          | 2011          | 2012          | 2013          | 2014          | 2015          |
|------------------|---------------|---------------|---------------|---------------|---------------|---------------|---------------|---------------|---------------|---------------|---------------|---------------|---------------|---------------|---------------|---------------|---------------|
| 1                | 288547        | 263537        | 607175        | 226183        | 697117        | 101490        | 314097        | 686923        | 199132        | 539304        | 276442        | 278640        | 108843        | 487116        | 526068        | 92167         | 214909        |
| 2                | 204812        | 203497        | 192328        | 422963        | 157662        | 516756        | 68004         | 222478        | 491116        | 135431        | 387306        | 201512        | 185677        | 80552         | 357292        | 391327        | 68496         |
| 3                | 65079         | 127285        | 116635        | 115700        | 239279        | 93234         | 301653        | 37802         | 127848        | 298400        | 80104         | 247839        | 128077        | 120671        | 54733         | 238541        | 270285        |
| <b>NO 2-3 YR</b> | <b>269891</b> | <b>330782</b> | <b>308963</b> | <b>538663</b> | <b>396941</b> | <b>609990</b> | <b>369657</b> | <b>260280</b> | <b>618964</b> | <b>433831</b> | <b>467410</b> | <b>449351</b> | <b>313754</b> | <b>201223</b> | <b>412025</b> | <b>629868</b> | <b>338781</b> |
| 4                | 114303        | 39072         | 71689         | 61275         | 62104         | 112403        | 48627         | 167927        | 20670         | 64745         | 180296        | 47439         | 156270        | 75371         | 73822         | 36162         | 155177        |
| 5                | 50097         | 64947         | 20794         | 35074         | 31879         | 29928         | 46264         | 24301         | 95197         | 9332          | 37984         | 102849        | 28887         | 91854         | 43965         | 47443         | 23406         |
| 6                | 21103         | 26792         | 29823         | 9680          | 17953         | 16379         | 12816         | 21043         | 10766         | 50439         | 5662          | 21385         | 59257         | 15867         | 52996         | 28137         | 28369         |
| 7                | 18113         | 9709          | 14336         | 13470         | 4640          | 8319          | 7584          | 5883          | 10857         | 3413          | 31115         | 2782          | 12475         | 33312         | 9432          | 31762         | 17421         |
| 8+               | 23973         | 14605         | 17891         | 12471         | 13444         | 18191         | 7756          | 7092          | 7718          | 7655          | 8939          | 26943         | 15596         | 12389         | 25423         | 23002         | 32054         |
| <b>NO 4+</b>     | <b>227589</b> | <b>155125</b> | <b>154533</b> | <b>131970</b> | <b>130020</b> | <b>185220</b> | <b>123047</b> | <b>226246</b> | <b>145208</b> | <b>135584</b> | <b>263996</b> | <b>201398</b> | <b>272485</b> | <b>228793</b> | <b>205638</b> | <b>166506</b> | <b>256427</b> |
